# Supplementary material for: MYOD1 functions as a clock amplifier as well as a critical co-factor for downstream circadian gene expression in muscle
Source: eLife journal article supplement (doi:10.7554/elife.43017), 2019-02-21

**A** VN-CLOCK + VC-MATR3

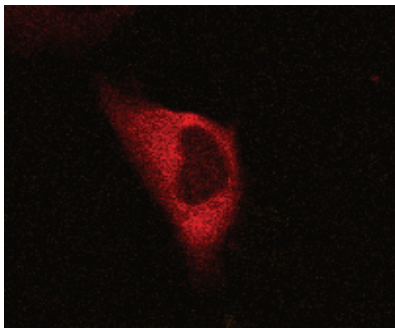

**B** VC-BMAL1 + VN-MATR3

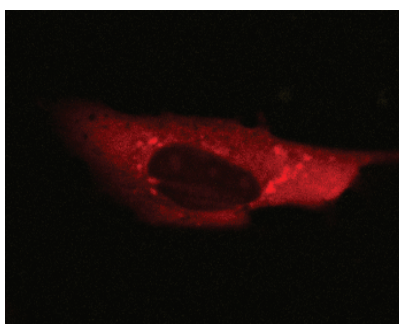

**C** VN-HDAC5 + VC-vector

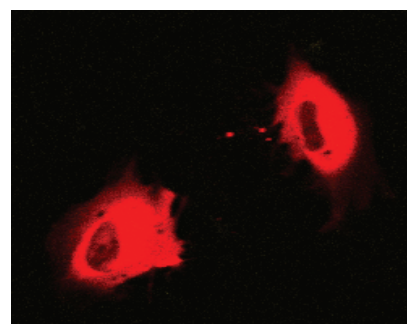

**D** VC-MEF2c + VN-vector

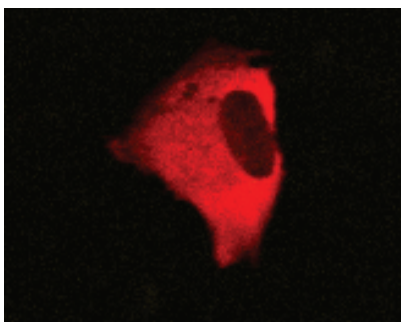

**E** VN-HDAC5 + VC-MEF2c

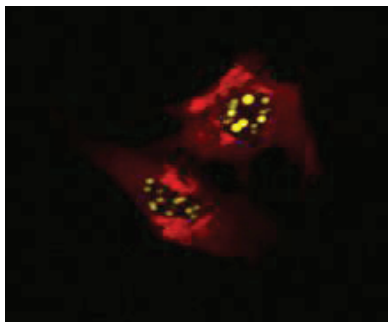

**F** VN-BMAL1 + VC-vector

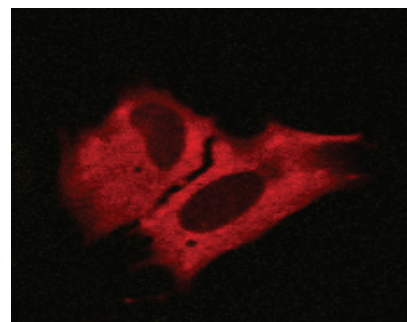

**G** VC-BMAL2 + VN-vector

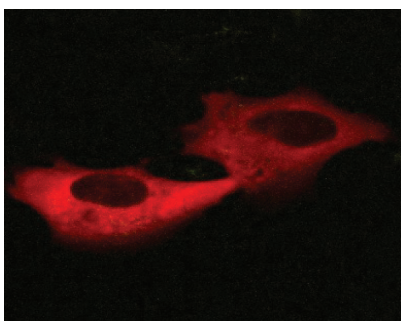

**H** VC-MYOD1 + VN-vector

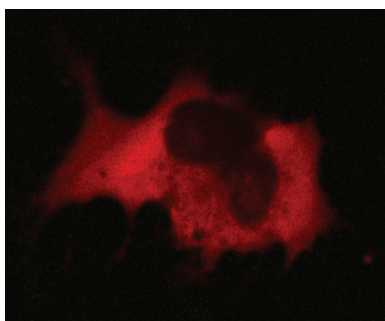

**I** VN-CLOCK + VC-vector

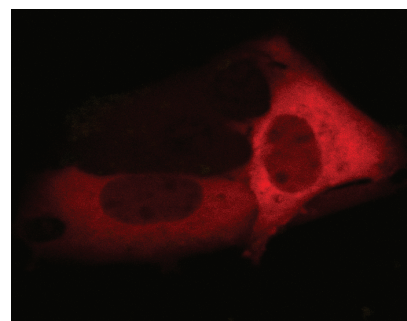

**J** VN-BMAL1 + VC-vector

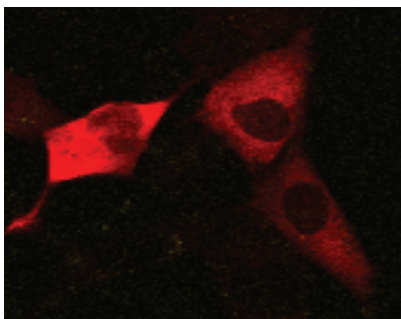

Supplement: supp [file elife-43017-supp-v1.zip]
