# Supplementary material for: MYOD1 functions as a clock amplifier as well as a critical co-factor for downstream circadian gene expression in muscle
Source: eLife. 2019 Feb 21;8:e43017. doi: 10.7554/eLife.43017 (PMC6398978; doi:10.7554/eLife.43017)
Supplement: Supplementary file 1. [file elife-43017-supp1.xlsx]

## Sheet: MYOD1_ChIP-Seq_Sk.Musc.
Entrez ID	PeakID (cmd=annotatePeaks.pl /Users/brianhodge/Desktop/Tapscott_Data/MYOD1_TAGS/peaks_L6.txt mm10 -gene /Users/brianhodge/Desktop/Tapscott_Data/Hogenesch_Gene_Info.txt)	Chr	Start	End	Strand	Peak Score	Focus Ratio/Region Size	Annotation	Detailed Annotation	Distance to TSS	Nearest PromoterID	Nearest Unigene	Nearest Refseq	Nearest Ensembl	Gene Name	Gene Alias	Gene Description	Gene Type	Gene.Symbol	Hogenesch	BH.Q	ADJ.P	PER	LAG	AMP	t18	t22	t26	t30	t34	t38
72309	chr9-1088	chr9	123259476	123259746	+	8.75	0.8	3' UTR (NM_001002267, exon 1 of 1)	3' UTR (NM_001002267, exon 1 of 1)	1178	NM_001002267	Mm.8569	NM_001002267	ENSMUSG00000054871	Tmem158	2310037P21Rik|Ris1	transmembrane protein 158	protein-coding	Tmem158	10597945	1	0.410551	12	6	0.152099	75.1343	67.1567	77.2274	65.6631	72.359	66.8692
13380	chr19-714	chr19	30566600	30566870	+	8.75	0.833	3' UTR (NM_001013833, exon 18 of 18)	3' UTR (NM_001013833, exon 18 of 18)	-17239	NM_010051	Mm.214717	NM_010051	ENSMUSG00000024868	Dkk1	mdkk-1	dickkopf WNT signaling pathway inhibitor 1	protein-coding	Dkk1	10467006	1	0.357622	12	8	0.143521	47.6948	45.8637	52.7921	44.587	56.64	52.1433
73449	chr18-100	chr18	35730057	35730327	+	17.5	0.667	3' UTR (NM_001033168, exon 2 of 2)	3' UTR (NM_001033168, exon 2 of 2)	3203	NM_001033168	Mm.379225	NM_001033168	ENSMUSG00000073598	1700066B19Rik	-	RIKEN cDNA 1700066B19 gene	protein-coding	1700066B19Rik	10454836	1	1	20	12.5	0	67.1847	62.6516	57.8871	57.5726	58.6476	57.2189
66070	chr9-116	chr9	14547565	14547835	+	19	0.769	3' UTR (NM_001081395, exon 13 of 13)	3' UTR (NM_001081395, exon 13 of 13)	47081	NM_023153	Mm.245938	NM_023153	ENSMUSG00000004096	Cwc15	0610040D20Rik|2900052N06Rik|Ed1|c11orf5|mED1	CWC15 spliceosome-associated protein	protein-coding	Cwc15	10583254	1	0.610752	12	1.5	0.0383075	516.212	500.578	507.977	509.31	485.551	518.105
208194	chr9-81	chr9	119483554	119483824	+	22.6	0.667	3' UTR (NM_001253860, exon 27 of 27)	3' UTR (NM_001253860, exon 27 of 27)	38766	NM_172456	Mm.101578	NM_172456	ENSMUSG00000042787	Exog	AW557704|ENGL-B|ENGL-a|Endogl1|Endogl2|Engl|Engla|Englb	endo/exonuclease (5'-3'), endonuclease G-like	protein-coding	Exog	10590182	1	0.610752	24	4	0	39.1318	34.7093	39.1286	38.4089	36.1632	37.4917
84035	chr11-104	chr11	5277583	5277853	+	27	0.844	3' UTR (NM_001290501, exon 9 of 9)	3' UTR (NM_001290501, exon 9 of 9)	-16108	NM_032396	Mm.209989	NM_032396	ENSMUSG00000020393	Kremen1	AV002070|Kremen|Krm1	kringle containing transmembrane protein 1	protein-coding	Kremen1	10383970	0.66424	0.125235	12	11	0.152572	541.662	530.504	577.821	618.787	537.068	564.586
213121	chr3-746	chr3	96663487	96663757	+	10.9	0.842	3' UTR (NM_001302471, exon 30 of 30)	3' UTR (NM_001302471, exon 30 of 30)	-6509	NM_001081139	Mm.39732	NM_001081139	ENSMUSG00000038354	Ankrd35	4732436F15Rik	ankyrin repeat domain 35	protein-coding	Ankrd35	10494500	1	0.536501	12	8	0.155238	48.1465	41.2422	48.0209	42.1298	43.7333	40.7184
71803	chr6-231	chr6	120795383	120795653	+	17.5	0.706	3' UTR (NM_007510, exon 9 of 9)	3' UTR (NM_007510, exon 9 of 9)	21750	NM_001081048	Mm.425340	NM_001081048	ENSMUSG00000004902	Slc25a18	1500015I14Rik|AW125787	solute carrier family 25 (mitochondrial carrier), member 18	protein-coding	Slc25a18	10541268	1	1	20	11.5	0.0572152	5.92481	6.14164	6.15471	6.27776	6.07813	6.09157
13185	chr16-360	chr16	94497927	94498197	+	11.7	0.731	3' UTR (NM_007834, exon 8 of 8)	3' UTR (NM_007834, exon 8 of 8)	28567	NM_007834	Mm.7472	NM_007834	ENSMUSG00000022898	Dscr3	AW538125|Dcra	Down syndrome critical region gene 3	protein-coding	Dscr3	10441064	0.608446	0.10647	12	0	0.0956998	178.595	177.298	200.314	195.822	175.843	168.801
17329	chr5-686	chr5	92323312	92323582	+	10.9	0.692	3' UTR (NM_008599, exon 4 of 4)	3' UTR (NM_008599, exon 4 of 4)	4632	NM_008599	Mm.766	NM_008599	ENSMUSG00000029417	Cxcl9	BB139920|CMK|Mig|MuMIG|Scyb9|crg-10	chemokine (C-X-C motif) ligand 9	protein-coding	Cxcl9	10531407	0.994691	0.269008	12	3	0.0759857	76.1457	140.263	109.36	136.473	115.775	108.666
218454	chr13-44	chr13	93941096	93941366	+	23.3	0.929	3' UTR (NM_009712, exon 8 of 8)	3' UTR (NM_009712, exon 8 of 8)	-116565	NM_172589	Mm.316553	NM_172589	ENSMUSG00000045312	Lhfpl2	6030465B15|AI447312|AW050335|mKIAA0206|vgim	lipoma HMGIC fusion partner-like 2	protein-coding	Lhfpl2	10406676	0.146865	0.00939007	24	7	0.0902693	75.9075	74.8173	93.6236	76.4	69.93	68.3434
27370	chr10-1060	chr10	128632787	128633057	+	9.48	0.929	3' UTR (NM_011772, exon 8 of 8)	3' UTR (NM_011772, exon 8 of 8)	-6416	NM_013765	Mm.32118	NM_013765	ENSMUSG00000025362	Rps26	-	ribosomal protein S26	protein-coding	Rps26	10373498	1	1	20	12.8333	0.0074639	2719.64	2641.97	2459.42	2452.61	2367.26	2665.89
56198	chr4-66	chr4	123249148	123249418	+	23.3	0.75	3' UTR (NM_013905, exon 5 of 5)	3' UTR (NM_013905, exon 5 of 5)	15727	NM_013905	Mm.103615	NM_013905	ENSMUSG00000032744	Heyl	Hey3|Hrt3|bHLHb33|hesr3	hairy/enhancer-of-split related with YRPW motif-like	protein-coding	Heyl	10507840	1	0.536501	24	13	0.159354	120.975	101.679	133.906	121.199	115.131	108.703
54422	chr2-1074	chr2	28908367	28908637	+	10.2	0.682	3' UTR (NM_019446, exon 3 of 3)	3' UTR (NM_019446, exon 3 of 3)	7919	NM_019446	Mm.21390	NM_019446	ENSMUSG00000026805	Barhl1	Dres115|MBH2	BarH-like 1 (Drosophila)	protein-coding	Barhl1	10481329	0.852649	0.199965	12	7	0.0536128	68.4596	63.2665	75.3925	62.7081	70.1996	67.713
22169	chr12-472	chr12	26478135	26478405	+	11.7	0.68	3' UTR (NM_020557, exon 5 of 5)	3' UTR (NM_020557, exon 5 of 5)	9055	NM_020557	Mm.271839	NM_020557	ENSMUSG00000020638	Cmpk2	1200004E04Rik|TDKI|Tyki	cytidine monophosphate (UMP-CMP) kinase 2, mitochondrial	protein-coding	Cmpk2	10395039	0.922182	0.232281	24	2	0.0836154	50.0209	49.7802	47.5028	45.2178	46.9118	48.4871
66514	chr19-149	chr19	9112151	9112421	+	16.8	0.615	3' UTR (NM_025610, exon 7 of 7)	3' UTR (NM_025610, exon 7 of 7)	23280	NM_025610	Mm.272847	NM_025610	ENSMUSG00000024654	Asrgl1	2410004D18Rik|ALP|ALP1|AU040643|AW060375	asparaginase like 1	protein-coding	Asrgl1	10465844	1	0.693388	12	2	0.0153796	427.393	368.962	411.592	429.71	439.732	410.088
66585	chr4-124	chr4	130389608	130389878	+	21.1	0.821	3' UTR (NM_025645, exon 10 of 10)	3' UTR (NM_025645, exon 10 of 10)	29611	NM_025645	Mm.423019	NM_025645	ENSMUSG00000074088	Snrnp40	0610009C03Rik|Prp8bp|Wdr57	small nuclear ribonucleoprotein 40 (U5)	protein-coding	Snrnp40	10608696	0.0151421	0.00031003	24	15	0.0755614	175.011	181.595	185.633	198.75	198.882	188.824
68036	chr15-191	chr15	36999635	36999905	+	16	0.727	3' UTR (NM_026521, exon 4 of 4)	3' UTR (NM_026521, exon 4 of 4)	7632	NM_026521	Mm.371631	NM_026521	ENSMUSG00000062397	Zfp706	3110006P09Rik|AA793007|AW536850|C77232|Znf706	zinc finger protein 706	protein-coding	Zfp706	10349049	1	1	20	9.5	0	2770.06	2501.37	2455.84	2650.59	2538.92	2809.12
69034	chr5-786	chr5	129908766	129909036	+	12.4	0.613	3' UTR (NM_026916, exon 1 of 3)	3' UTR (NM_026916, exon 1 of 3)	361	NM_026916	Mm.211372	NM_026916	ENSMUSG00000095789	Nupr1l	1810010E01Rik|4930579G22Rik|Nupr2	nuclear protein transcriptional regulator 1 like	protein-coding	4930579G22Rik	10526101	0.215927	0.0173912	12	7	0	6.47744	6.40297	6.38831	6.18552	6.43118	6.44297
16691	chr15-459	chr15	101996778	101997048	+	13.1	0.793	3' UTR (NM_031170, exon 9 of 9)	3' UTR (NM_031170, exon 9 of 9)	7429	NM_031170	Mm.358618	NM_031170	ENSMUSG00000049382	Krt8	AA960620|AL022697|AU019895|Card2|EndoA|K8|Krt-2.8|Krt2-8	keratin 8	protein-coding	Krt8	10432918	0.66424	0.125235	12	7	0.159014	94.9193	95.6054	75.571	80.9276	82.1438	91.1569
140703	chr11-54	chr11	5192344	5192614	+	32.1	0.693	3' UTR (NM_032396, exon 9 of 9)	3' UTR (NM_032396, exon 9 of 9)	-40257	NM_080595	Mm.840	NM_080595	ENSMUSG00000034164	Emid1	AW122071|CO-5|Emu1	EMI domain containing 1	protein-coding	Emid1	10383953	1	1	20	9.16667	0.00831008	192.927	164.65	173.804	155.806	172.424	173.317
732489	chr2-1487	chr2	117180617	117180887	+	9.48	0.929	3' UTR (NM_033524, exon 7 of 7)	3' UTR (NM_033524, exon 7 of 7)	-4375	NR_030440		NR_030440	ENSMUSG00000076376	Mir674	Mirn674|mir-674|mmu-mir-674	microRNA 674	ncRNA	Mir674	10474683	0.66424	0.125235	24	21	0.091337	163.367	158.411	149.843	142.429	166.083	159.003
69852	chr5-235	chr5	30974900	30975170	+	15.3	0.7	3' UTR (NM_053085, exon 3 of 3)	3' UTR (NM_053085, exon 3 of 3)	6358	NM_053085	Mm.57874	NM_053085	ENSMUSG00000006642	Tcf23	2010002O16Rik|Out|bHLHa24	transcription factor 23	protein-coding	Tcf23	10520633	0.242857	0.0211898	12	8	0.0376534	74.8977	73.6468	85.5265	65.828	75.4417	92.357
74754	chr4-1194	chr4	106587019	106587289	+	9.48	0.882	3' UTR (NM_053272, exon 9 of 9)	3' UTR (NM_053272, exon 9 of 9)	26116	NM_053272	Mm.133370	NM_053272	ENSMUSG00000034926	Dhcr24	2310076D10Rik|5830417J06Rik|mKIAA0018	24-dehydrocholesterol reductase	protein-coding	Dhcr24	10506571	0.555588	0.0902228	24	9	0.0817203	134.353	143.185	139.353	149.155	122.42	119.58
28000	chr19-48	chr19	10905245	10905515	+	20.4	0.739	3' UTR (NM_134129, exon 16 of 16)	3' UTR (NM_134129, exon 16 of 16)	6735	NM_001253844	Mm.491104	NM_134129	ENSMUSG00000024735	Prpf19	AA617263|AL024362|D19Wsu55e|NMP200|PSO4|Prp19|Snev	pre-mRNA processing factor 19	protein-coding	Prpf19	10461568	1	0.536501	24	14.5	0.0306884	10.2913	10.3001	10.3195	10.3276	10.3391	10.3507
218624	chr13-130	chr13	112523501	112523771	+	19.7	0.718	3' UTR (NM_139299, exon 17 of 17)	3' UTR (NM_139299, exon 17 of 17)	57026	NM_139299	Mm.380801	NM_139299	ENSMUSG00000050377	Il31ra	CRL3|GLM-R|GPL|Glmr|NR10	interleukin 31 receptor A	protein-coding	Il31ra	10412126	1	0.410551	12	7	0.00181019	25.4877	25.0217	25.2384	23.2895	25.6652	25.361
60527	chr19-416	chr19	10034808	10035078	+	12.4	0.731	3' UTR (NM_144538, exon 10 of 10)	3' UTR (NM_144538, exon 10 of 10)	-6605	NM_021890	Mm.253875	NM_021890	ENSMUSG00000024664	Fads3	AI464531	fatty acid desaturase 3	protein-coding	Fads3	10461423	0.66424	0.125235	12	3	0.128983	144.413	214.222	164.776	172.743	159.472	169.664
226777	chr1-704	chr1	184897544	184897814	+	11.7	0.773	3' UTR (NM_145515, exon 18 of 18)	3' UTR (NM_145515, exon 18 of 18)	-14643	NM_178692	Mm.169542	NM_178692	ENSMUSG00000039349	C130074G19Rik	-	RIKEN cDNA C130074G19 gene	protein-coding	C130074G19Rik	10360858	0.418067	0.0538095	24	7.5	0.038007	120.887	115.506	118.921	113.998	106.776	98.1666
228359	chr2-674	chr2	91674917	91675187	+	12.4	0.719	3' UTR (NM_145528, exon 16 of 16)	3' UTR (NM_145528, exon 16 of 16)	21844	NM_146124	Mm.22413	NM_146124	ENSMUSG00000027247	Arhgap1	B230365D05Rik|C76222|Cdc42GAP|p50rhoGAP	Rho GTPase activating protein 1	protein-coding	Arhgap1	10473965	0.0151421	0.00031003	24	5	0.211489	164.957	213.506	209.694	199.101	159.344	158.502
16172	chr6-520	chr6	120443815	120444085	+	11.7	0.75	3' UTR (NM_145997, exon 28 of 28)	3' UTR (NM_145997, exon 28 of 28)	-19247	NM_008359	Mm.4481	NM_008359	ENSMUSG00000002897	Il17ra	AW538159|Cdw217|Il17r|VDw217	interleukin 17 receptor A	protein-coding	Il17ra	10541246	0.0712878	0.00309146	12	4	0.163639	60.0857	85.1704	62.9795	59.0342	63.4259	60.4818
103768	chr11-209	chr11	101162704	101162974	+	23.3	0.655	3' UTR (NM_146030, exon 13 of 13)	3' UTR (NM_146030, exon 13 of 13)	6955	NM_134028	Mm.142348	NM_134028	ENSMUSG00000045007	Tubg2	AI504772|Tubgl	tubulin, gamma 2	protein-coding	Tubg2	10381260	1	1	20	5.83333	0.0114048	187.512	149.403	155.622	164.258	157.259	162.104
29806	chr9-37	chr9	123461865	123462135	+	81.7	0.639	3' UTR (NM_153168, exon 21 of 21)	3' UTR (NM_153168, exon 21 of 21)	-16701	NM_013860	Mm.10987	NM_013860	ENSMUSG00000025239	Limd1	AW822033|D9Ertd192e	LIM domains containing 1	protein-coding	Limd1	10590586	0.271867	0.0257197	12	0	0.0924471	443.611	411.926	405.177	445.691	427.396	419.766
73389	chr12-190	chr12	31926779	31927049	+	16	0.694	3' UTR (NM_153198, exon 11 of 11)	3' UTR (NM_153198, exon 11 of 11)	23621	NM_153198	Mm.390461	NM_153198	ENSMUSG00000002996	Hbp1	1700058O05Rik|BE629963|C330012F01Rik|C86454	high mobility group box transcription factor 1	protein-coding	Hbp1	10399897	0.0124456	0.00023376	24	14	0.0644316	821.553	846.373	911.659	890.258	917.306	881.863
235504	chr9-61	chr9	78537255	78537525	+	32.1	0.863	3' UTR (NM_172773, exon 11 of 11)	3' UTR (NM_172773, exon 11 of 11)	50655	NM_172773	Mm.46932	NM_172773	ENSMUSG00000049624	Slc17a5	4631416G20Rik|4732491M05|AST|ISSD|NSD|SD|SIALIN|SIASD|SLD	solute carrier family 17 (anion/sugar transporter), member 5	protein-coding	Slc17a5	10595189	0.418067	0.0538095	24	15	0.123701	294.342	302.764	332.345	326.903	330.686	367.182
331524	chrX-88	chrX	134150151	134150421	+	9.48	0.682	3' UTR (NM_183319, exon 3 of 3)	3' UTR (NM_183319, exon 3 of 3)	11642	NM_183319	Mm.235055	NM_183319	ENSMUSG00000031258	Xkrx	A630026F04	X-linked Kx blood group related, X-linked	protein-coding	Xkrx	10606654	1	0.357622	24	5	0.030349	37.9985	40.0375	36.8594	36.0458	35.9954	35.779
76178	chr1-1373	chr1	37419312	37419582	+	8.02	0.571	3' UTR (NM_198006, exon 3 of 3)	3' UTR (NM_198006, exon 3 of 3)	10656	NM_198006	Mm.28085	NM_198006	ENSMUSG00000026112	Coa5	1700001A24Rik|6330578E17Rik|Pet191	cytochrome C oxidase assembly factor 5	protein-coding	6330578E17Rik	10353993	1	0.693388	12	5.5	0.056215	10.0123	9.93349	10.0498	10.0092	9.99594	9.92766
320209	chr17-505	chr17	66123528	66123798	+	13.1	0.905	5' UTR (NM_001003919, exon 1 of 27)	5' UTR (NM_001003919, exon 1 of 27)	143	NM_001003919	Mm.259605	NM_001003919	ENSMUSG00000035842	Ddx11	4732462I11Rik|CHL1|CHLR1|KRG2|essa15a	DEAD/H (Asp-Glu-Ala-Asp/His) box helicase 11	protein-coding	Ddx11	10446441	1	1	20	9.83333	0.0388272	63.5302	53.4245	60.0965	52.8976	57.5818	53.9803
216825	chr11-322	chr11	61174801	61175071	+	17.5	0.579	5' UTR (NM_001004143, exon 1 of 13)	5' UTR (NM_001004143, exon 1 of 13)	123	NM_001004143	Mm.30602	NM_001004143	ENSMUSG00000042506	Usp22	AI427806	ubiquitin specific peptidase 22	protein-coding	Usp22	10386636	0.271867	0.0257197	24	14	0.061787	230.38	253.247	266.097	280.96	287.144	256.686
381549	chr4-353	chr4	120951331	120951601	+	16	0.676	5' UTR (NM_001005788, exon 1 of 6)	5' UTR (NM_001005788, exon 1 of 6)	235	NM_001005788	Mm.331840	NM_001005788	ENSMUSG00000064141	Zfp69	Gm1029|Krab2|Zfp63	zinc finger protein 69	protein-coding	Zfp69	10515986	1	0.610752	18	10	0.0223764	32.6604	31.1023	32.7688	32.0408	33.5232	29.831
238693	chr13-401	chr13	67500247	67500517	+	13.1	0.625	5' UTR (NM_001007575, exon 1 of 4)	5' UTR (NM_001007575, exon 1 of 4)	140	NM_001007575	Mm.478914	NM_001007575	ENSMUSG00000071291	Zfp58	A530094I17Rik|Mfg-1|Mfg1|Rslcan5|Zfp817	zinc finger protein 58	protein-coding	Zfp58	10410332	0.922182	0.232281	24	12	0.0287085	63.5553	71.3168	73.3523	78.4293	71.437	76.6748
108961	chr7-585	chr7	48880616	48880886	+	11.7	0.769	5' UTR (NM_001013368, exon 1 of 13)	5' UTR (NM_001013368, exon 1 of 13)	290	NM_001013368	Mm.240566	NM_001013368	ENSMUSG00000046179	E2f8	4432406C08Rik|AA410048	E2F transcription factor 8	protein-coding	E2f8	10563780	1	1	20	10.8333	0.00887812	32.4069	27.9001	28.598	30.3606	28.7755	27.4731
67534	chr1-1309	chr1	74672761	74673031	+	9.48	0.842	5' UTR (NM_001014974, exon 2 of 20)	5' UTR (NM_001014974, exon 2 of 20)	11142	NM_001014974	Mm.260714	NM_001014974	ENSMUSG00000033257	Ttll4	4632407P03Rik|AI451681|mKIAA0173	tubulin tyrosine ligase-like family, member 4	protein-coding	Ttll4	10347460	0.66424	0.125235	24	1	0.0760069	314.71	353.398	267.203	298.47	302.414	329.084
381305	chr1-188	chr1	160906545	160906815	+	18.2	0.534	5' UTR (NM_001024952, exon 1 of 20)	5' UTR (NM_001024952, exon 1 of 20)	269	NM_001024952	Mm.329667	NM_001024952	ENSMUSG00000040423	Rc3h1	5730557L09Rik|Gm551|N28103|mKIAA2025	RING CCCH (C3H) domains 1	protein-coding	Rc3h1	10350992	0.00673042	9.66e-05	24	3	0.192588	752.308	893.479	671.983	666.703	606.969	738.826
66317	chr9-1073	chr9	54734295	54734565	+	8.75	0.682	5' UTR (NM_001025375, exon 1 of 11)	5' UTR (NM_001025375, exon 1 of 11)	119	NM_001025376	Mm.28437	NM_023191	ENSMUSG00000061559	Wdr61	2700038L12Rik|2810418I05Rik|REC14	WD repeat domain 61	protein-coding	Wdr61	10593740	0.994691	0.269008	12	0	0.0800798	8.60441	8.60344	8.77532	8.71474	8.65171	8.66186
237877	chr11-1086	chr11	80089578	80089848	+	11.7	0.75	5' UTR (NM_001029856, exon 1 of 23)	5' UTR (NM_001029856, exon 1 of 23)	313	NM_001029856	Mm.89551	NM_001029856	ENSMUSG00000017550	Atad5	C130052G03Rik|FRAG1|Gm17	ATPase family, AAA domain containing 5	protein-coding	Atad5	10379363	1	0.886572	12	8	0	25.4224	25.3953	27.093	24.2281	26.4537	29.4062
109700	chr13-527	chr13	115101683	115101953	+	10.9	0.64	5' UTR (NM_001033228, exon 1 of 29)	5' UTR (NM_001033228, exon 1 of 29)	146	NM_001033228	Mm.317280	NM_001033228	ENSMUSG00000042284	Itga1	CD49A|E130012M19Rik|Vla1	integrin alpha 1	protein-coding	Itga1	10412298	0.66424	0.125235	24	6.5	0.176883	274.787	306.506	359.197	332.802	261.571	275.201
328232	chr13-150	chr13	43303554	43303824	+	16.8	0.718	5' UTR (NM_001033399, exon 1 of 2)	5' UTR (NM_001033399, exon 1 of 2)	483	NM_001033399	Mm.441399	NM_001033399	ENSMUSG00000051335	Gfod1	9630032O13|AI850995	glucose-fructose oxidoreductase domain containing 1	protein-coding	Gfod1	10408879	1	1	20	8.16667	0.00434792	69.5515	70.7574	68.2241	77.0061	66.853	70.2823
381126	chr18-165	chr18	21299856	21300126	+	15.3	0.6	5' UTR (NM_001033445, exon 1 of 6)	5' UTR (NM_001033445, exon 1 of 6)	148	NM_001033445	Mm.312276	NM_001033445	ENSMUSG00000042680	Garem1	C86169|Fam59a|Garem|Gm944|mKIAA4238	GRB2 associated regulator of MAPK1 subtype 1	protein-coding	Fam59a	10457780	0.460888	0.0641441	12	0	0.127753	7.0682	7.02162	7.23673	7.49125	7.0403	7.04637
382423	chr10-96	chr10	112928680	112928950	+	21.9	0.638	5' UTR (NM_001033474, exon 1 of 1)	5' UTR (NM_001033474, exon 1 of 1)	211	NM_001033474	Mm.431239	NM_001033474	ENSMUSG00000074748	Atxn7l3b	4921506J03Rik|6230409E21Rik|AI315132|ENSMUSG00000074747	ataxin 7-like 3B	protein-coding	Atxn7l3b	10372417	1	1	20	8.5	0.00339804	300.458	330.144	312.935	334.82	323.316	337.726
101835	chr7-777	chr7	41499553	41499823	+	14.6	0.69	5' UTR (NM_001033530, exon 1 of 4)	5' UTR (NM_001033530, exon 1 of 4)	202	NM_001033530	Mm.370336	NM_001033530	ENSMUSG00000074166	AW146154	AI451288	expressed sequence AW146154	protein-coding	AW146154///Vmn2r57	10562612	1	1	20	10.8333	0.0330895	5.60257	5.78958	5.98387	5.79315	5.89435	5.86534
242377	chr4-432	chr4	33189417	33189687	+	14.6	0.742	5' UTR (NM_001034867, exon 1 of 7)	5' UTR (NM_001034867, exon 1 of 7)	185	NM_001034867	Mm.372465	NM_001034867	ENSMUSG00000054659	Pm20d2	Acy1l2|Gm424	peptidase M20 domain containing 2	protein-coding	Pm20d2	10511923	0.723213	0.146835	12	11	0.155309	216.433	199.541	248.693	239.34	224.807	221.009
58172	chr11-284	chr11	20631965	20632235	+	19	0.6	5' UTR (NM_001038625, exon 1 of 2)	5' UTR (NM_001038625, exon 1 of 2)	123	NM_001038625	Mm.339676	NM_021372	ENSMUSG00000049800	Sertad2	AB041541|AU021878|Kiaa0127|MNCb-1504|SEI-2|Sei2|TRIP-Br2|mKIAA0127	SERTA domain containing 2	protein-coding	Sertad2	10374478	0.418067	0.0538095	12	1	0.122584	7.56708	7.38051	7.45373	7.50933	7.50069	7.54751
236904	chrX-72	chrX	94235028	94235298	+	10.2	0.679	5' UTR (NM_001039061, exon 1 of 3)	5' UTR (NM_001039061, exon 1 of 3)	233	NM_001039059	Mm.115533	NM_153165	ENSMUSG00000043929	Klhl15	6330500C13Rik	kelch-like 15	protein-coding	Klhl15	10600786	1	1	20	8.83333	0.0318017	6.18558	6.139	6.23667	6.28841	6.30301	6.25457
71148	chr4-738	chr4	103119361	103119631	+	10.9	0.548	5' UTR (NM_001039081, exon 1 of 13)	5' UTR (NM_001039081, exon 1 of 13)	106	NM_001039081	Mm.288721	NM_027696	ENSMUSG00000028522	Mier1	4933425I22Rik|5830411K19Rik|er1	MEIR1 treanscription regulator	protein-coding	Mier1	10506397	0.786454	0.171619	12	1	0.0577423	7.46903	7.50278	7.45772	7.69303	7.63768	7.5031
26987	chr1-231	chr1	87214260	87214530	+	17.5	0.634	5' UTR (NM_001039169, exon 1 of 7)	5' UTR (NM_001039169, exon 1 of 7)	456	NM_001039169	Mm.227183	NM_023314	ENSMUSG00000026254	Eif4e2	2700069E09Rik|AI036339|AV129531|D0H0S6743E|Eif4el3	eukaryotic translation initiation factor 4E member 2	protein-coding	Eif4e2	10348180	1	1	20	7.83333	0.01871	8.82393	8.77303	8.84534	8.87877	8.84364	8.81043
630579	chr13-498	chr13	62129884	62130154	+	10.9	0.739	5' UTR (NM_001039239, exon 1 of 4)	5' UTR (NM_001039239, exon 1 of 4)	129	NM_001039239	Mm.440905	NM_001039239	ENSMUSG00000074867	Zfp808	EG630579|Gm7036	zinc finger protein 80	protein-coding	Zfp808	10405733	1	1	20	10.1667	0.0171615	79.8871	95.748	90.7798	86.3474	89.7774	95.3321
242126	chr3-560	chr3	101923987	101924257	+	10.2	0.652	5' UTR (NM_001039371, exon 1 of 12)	5' UTR (NM_001039371, exon 1 of 12)	331	NM_001039371	Mm.90204	NM_001039371	ENSMUSG00000033147	Slc22a15	2610034P21Rik|4930477M19|A530052I06Rik|BB219042	solute carrier family 22 (organic anion/cation transporter), member 15	protein-coding	Slc22a15	10500720	1	1	20	6.83333	0.0384729	61.3657	63.4782	60.9819	54.3629	49.1746	59.2573
226541	chr1-749	chr1	161131232	161131502	+	11.7	0.606	5' UTR (NM_001039482, exon 1 of 12)	5' UTR (NM_001039482, exon 1 of 12)	112	NM_001039482	Mm.255165	NM_144876	ENSMUSG00000026705	Klhl20	AI504637|D930050H05Rik|Kleip|mKIAA4210	kelch-like 20	protein-coding	Klhl20	10359405	1	1	20	8.16667	0.0226691	8.06224	8.20632	8.10744	8.16769	8.15796	8.22758
667742	chr18-595	chr18	63386181	63386451	+	8.75	0.591	5' UTR (NM_001039485, exon 1 of 54)	5' UTR (NM_001039485, exon 1 of 54)	867	NM_001039485	Mm.158720	NM_172629	ENSMUSG00000041482	Piezo2	5930434P17|9030411M15Rik|9430028L06Rik|Fam38b|Fam38b2	piezo-type mechanosensitive ion channel component 2	protein-coding	Fam38b	10459335	1	1	20	11.5	0.0726741	5.74927	5.70929	6.03421	5.96922	5.70186	5.66874
17920	chr9-240	chr9	80165070	80165340	+	16.8	0.522	5' UTR (NM_001039546, exon 1 of 33)	5' UTR (NM_001039546, exon 1 of 33)	171	NM_001039546	Mm.4040	NM_008662	ENSMUSG00000033577	Myo6	BC029719|Tlc|sv	myosin VI	protein-coding	Myo6	10587446	0.271867	0.0257197	12	0	0.0108329	7.596	7.67802	7.68956	7.81902	7.56405	7.61496
75415	chr18-128	chr18	6135720	6135990	+	16.8	0.6	5' UTR (NM_001039692, exon 1 of 19)	5' UTR (NM_001039692, exon 1 of 19)	243	NM_001039692	Mm.239675	NM_029277	ENSMUSG00000041225	Arhgap12	2810011M08Rik	Rho GTPase activating protein 12	protein-coding	Arhgap12	10457250	1	0.693388	18	4.5	0.119282	7.68763	7.61893	7.78378	7.80326	7.73694	7.61165
67040	chr15-108	chr15	79546304	79546574	+	19.7	0.66	5' UTR (NM_001040187, exon 1 of 13)	5' UTR (NM_001040187, exon 1 of 13)	120	NM_199079	Mm.29644	NM_152806	ENSMUSG00000055065	Ddx17	2610007K22Rik|A430025E01Rik|AI047725|C80929|Gm926|p72	DEAD (Asp-Glu-Ala-Asp) box polypeptide 17	protein-coding	Ddx17	10430536	0.555588	0.0902228	24	9	0.0709912	9.53301	9.73147	9.71952	9.70442	9.56794	9.41507
11988	chr8-1086	chr8	40862363	40862633	+	10.2	0.593	5' UTR (NM_001044740, exon 1 of 12)	5' UTR (NM_001044740, exon 1 of 12)	131	NM_001044740	Mm.4676	NM_007514	ENSMUSG00000031596	Slc7a2	20.5|AI158848|Atrc2|CAT-2|Cat2|Tea	solute carrier family 7 (cationic amino acid transporter, y+ system), member 2	protein-coding	Slc7a2	10571444	0.0220008	0.000536109	24	21.5	0.278826	9.58818	9.30406	9.07263	9.19386	9.54737	9.57489
268281	chr10-61	chr10	11149448	11149718	+	26.2	0.667	5' UTR (NM_001077707, exon 1 of 30)	5' UTR (NM_001077707, exon 1 of 30)	153	NM_172937	Mm.133101	NM_172937	ENSMUSG00000090112	Shprh	2610103K11Rik|AA450458|AU024614|BC006883|D230017O13Rik|E130018M05	SNF2 histone linker PHD RING helicase	protein-coding	Shprh	10361712	0.66424	0.125235	12	1	0.00806809	233.81	266.287	265.754	270.064	254.597	242.508
110809	chr11-307	chr11	88047448	88047718	+	19.7	0.623	5' UTR (NM_001078167, exon 1 of 3)	5' UTR (NM_001078167, exon 1 of 3)	210	NM_001078167	Mm.391719	NM_173374	ENSMUSG00000018379	Srsf1	1110054N12Rik|5730507C05Rik|6330415C05Rik|AI482334|AW491331|Asf|Sf2|Sfrs1	serine/arginine-rich splicing factor 1	protein-coding	Srsf1	10380210	1	1	20	8.5	0.0081553	8.72227	8.72522	8.71756	8.85106	8.76325	8.75537
12757	chr4-532	chr4	44012641	44012911	+	13.9	0.625	5' UTR (NM_001080385, exon 1 of 7)	5' UTR (NM_001080385, exon 1 of 7)	126	NM_001290470	Mm.298875	NM_016760	ENSMUSG00000028478	Clta	AV026556|Lca	clathrin, light polypeptide (Lca)	protein-coding	Clta	10504458	1	1	20	10.1667	0.0219612	7.90469	7.96829	7.93198	8.0016	8.06337	7.87917
13728	chr19-17	chr19	7341575	7341845	+	29.2	0.641	5' UTR (NM_001080388, exon 1 of 17)	5' UTR (NM_001080388, exon 1 of 17)	150	NM_007928	Mm.258986	NM_007928	ENSMUSG00000024969	Mark2	EMK-1|Emk|Par-1|Par-1b	MAP/microtubule affinity regulating kinase 2	protein-coding	Mark2	10465649	1	1	20	9.5	0.0274114	162.152	148.79	189.435	189.444	158.859	163.27
237988	chr11-768	chr11	115381895	115382165	+	13.9	0.649	5' UTR (NM_001080929, exon 1 of 5)	5' UTR (NM_001080929, exon 1 of 5)	114	NM_001080929	Mm.102872	NM_001080929	ENSMUSG00000050910	Cdr2l	D030068L24Rik|Gm21	cerebellar degeneration-related protein 2-like	protein-coding	Cdr2l	10382502	1	0.693388	12	5	0	91.8183	79.0334	93.0207	87.1187	92.0669	86.22
72823	chr1-1041	chr1	61638943	61639213	+	10.9	0.593	5' UTR (NM_001081050, exon 1 of 23)	5' UTR (NM_001081050, exon 1 of 23)	254	NM_001081050	Mm.35153	NM_001081050	ENSMUSG00000052062	Pard3b	1810008K04Rik|2010002N16Rik|2810455B10Rik|Als2cr19|PAR3B|PAR3L|PAR3beta	par-3 family cell polarity regulator beta	protein-coding	Pard3b	10346810	1	1	20	10.5	0.000427407	130.894	110.27	129.252	113.685	115.871	121.64
544971	chr13-320	chr13	100103785	100104055	+	11.7	0.656	5' UTR (NM_001081061, exon 1 of 39)	5' UTR (NM_001081061, exon 1 of 39)	150	NM_001081061	Mm.288546	NM_001081061	ENSMUSG00000049658	Bdp1	AI662220|AW049390|AW456745|B130055N23Rik|G630013P12Rik|TAF3B1|TFC5|TFIIIB150|TFIIIB90|Tfnr|mKIAA1241	B double prime 1, subunit of RNA polymerase III transcription initiation factor IIIB	protein-coding	Bdp1	10411552	1	0.610752	18	3.5	0.0282913	209.458	210.343	202.479	227.612	191.893	207.925
225010	chr17-667	chr17	73108025	73108295	+	10.2	0.606	5' UTR (NM_001081071, exon 1 of 6)	5' UTR (NM_001081071, exon 1 of 6)	175	NM_001177967	Mm.329194	NM_001081071	ENSMUSG00000054469	Lclat1	AI181996|Agpat8|Alcat1|Gm91|Lycat	lysocardiolipin acyltransferase 1	protein-coding	Lclat1	10446771	1	1	20	10.5	0.0571162	9.22025	9.13973	9.31674	9.4197	9.45455	9.27899
66096	chr5-199	chr5	138255638	138255908	+	17.5	0.64	5' UTR (NM_001081108, exon 1 of 4)	5' UTR (NM_001081108, exon 1 of 4)	291	NM_001081108	Mm.206901	NM_001081108	ENSMUSG00000050552	Lamtor4	0910001L09Rik|AV006840	late endosomal/lysosomal adaptor, MAPK and MTOR activator 4	protein-coding	0910001L09Rik	10526792	1	1	20	12.8333	0.0196481	9.19824	9.14219	9.03015	9.04743	9.0103	9.13471
238505	chr13-231	chr13	12257756	12258026	+	15.3	0.596	5' UTR (NM_001081128, exon 1 of 33)	5' UTR (NM_001081128, exon 1 of 33)	222	NM_001081128	Mm.40335	NM_001081128	ENSMUSG00000021311	Mtr	AI894170|D830038K18Rik|MS	5-methyltetrahydrofolate-homocysteine methyltransferase	protein-coding	Mtr	10407709	0.271867	0.0257197	12	2	0.0363594	273.188	279.035	269.264	292.272	300.35	258.566
319670	chr12-944	chr12	98901111	98901381	+	8.75	0.56	5' UTR (NM_001081191, exon 1 of 44)	5' UTR (NM_001081191, exon 1 of 44)	238	NM_001081191	Mm.390484	NM_001081191	ENSMUSG00000051166	Eml5	BC027154|C130068M19Rik	echinoderm microtubule associated protein like 5	protein-coding	Eml5	10402020	1	1	20	9.83333	0.029132	102.572	112.718	103.955	101.059	119.307	120.607
69163	chr1-227	chr1	79775993	79776263	+	19.7	0.627	5' UTR (NM_001081210, exon 1 of 4)	5' UTR (NM_001081210, exon 1 of 4)	110	NM_001081210	Mm.238455	NM_001081210	ENSMUSG00000026248	Mrpl44	1810030E18Rik|5730593H20Rik|AI463302	mitochondrial ribosomal protein L44	protein-coding	Mrpl44	10347774	1	1	20	10.5	0.0193197	115.636	105.293	117.824	113.623	127.408	115.057
385674	chr16-322	chr16	3847279	3847549	+	12.4	0.741	5' UTR (NM_001081217, exon 1 of 3)	5' UTR (NM_001081217, exon 1 of 3)	191	NM_001081217	Mm.244261	NM_001081217	ENSMUSG00000054939	Zfp174	Gm1754	zinc finger protein 174	protein-coding	Zfp174	10433214	1	0.610752	24	19	0.0823284	129.825	123.064	124.413	113.723	119.985	129.707
319901	chr1-427	chr1	111864660	111864930	+	15.3	0.658	5' UTR (NM_001081316, exon 1 of 2)	5' UTR (NM_001081316, exon 1 of 2)	123	NM_001081316	Mm.103468	NM_001081316	ENSMUSG00000038702	Dsel	9330132E09Rik|DS-epi2	dermatan sulfate epimerase-like	protein-coding	Dsel	10357115	1	1	20	8.16667	0.0168716	44.9366	51.2379	49.9184	56.2098	45.9588	46.9571
66060	chr18-16	chr18	36348621	36348891	+	29.9	0.692	5' UTR (NM_001081365, exon 1 of 3)	5' UTR (NM_001081365, exon 1 of 3)	132	NM_001081365	Mm.272527	NM_001081365	ENSMUSG00000046727	Cystm1	0610010O12Rik	cysteine-rich transmembrane module containing 1	protein-coding	0610010O12Rik	10454881	1	1	20	8.16667	0.000447834	10.8278	10.7284	10.6939	10.7193	10.6759	10.756
320817	chr12-140	chr12	4917395	4917665	+	18.2	0.565	5' UTR (NM_001099628, exon 1 of 31)	5' UTR (NM_001099628, exon 1 of 31)	177	NM_001099628	Mm.210966	NM_001099628	ENSMUSG00000052812	Atad2b	1110014E10Rik|BC032887|C79189|D530031C13Rik	ATPase family, AAA domain containing 2B	protein-coding	Atad2b	10394366	0.608446	0.10647	24	5	0	239.548	275.535	243.397	252.773	233.408	268.173
74051	chr5-1411	chr5	5693715	5693985	+	8.75	0.565	5' UTR (NM_001103157, exon 1 of 6)	5' UTR (NM_001103157, exon 1 of 6)	239	NM_001285470	Mm.274956	NM_028734	ENSMUSG00000015653	Steap2	4921538B17Rik|AI930049|AW045895|IPCA-1|IPCA1|PCANAP1|STAMP1|STMP	six transmembrane epithelial antigen of prostate 2	protein-coding	Steap2	10519484	1	0.410551	12	8	0.000516188	4.26647	4.40416	4.2672	4.29575	4.27082	4.5567
74051	chr5-1411	chr5	5693715	5693985	+	8.75	0.565	5' UTR (NM_001103157, exon 1 of 6)	5' UTR (NM_001103157, exon 1 of 6)	239	NM_001285470	Mm.274956	NM_028734	ENSMUSG00000015653	Steap2	4921538B17Rik|AI930049|AW045895|IPCA-1|IPCA1|PCANAP1|STAMP1|STMP	six transmembrane epithelial antigen of prostate 2	protein-coding	Steap2	10528008	1	1	20	12.1667	0.00902033	5.58225	5.79418	5.73345	5.68856	5.75704	5.81543
68031	chr10-374	chr10	29362019	29362289	+	14.6	0.781	5' UTR (NM_001110198, exon 1 of 4)	5' UTR (NM_001110198, exon 1 of 4)	288	NM_026518	Mm.28930	NM_026518	ENSMUSG00000038876	Rnf146	2610509H23Rik|Iduna	ring finger protein 146	protein-coding	Rnf146	10368486	0.608446	0.10647	12	0	0.257189	183.01	172.532	195.799	221.759	205.314	217.779
12395	chr4-989	chr4	13743452	13743722	+	9.48	0.6	5' UTR (NM_001111026, exon 1 of 11)	5' UTR (NM_001111026, exon 1 of 11)	285	NM_001111026	Mm.4909	NM_009822	ENSMUSG00000006586	Runx1t1	Cbfa2t1h|ETO|MTG8	runt-related transcription factor 1; translocated to, 1 (cyclin D-related)	protein-coding	Runx1t1	10503382	1	1	20	10.8333	0.0462071	6.67116	6.46239	6.52606	6.5657	6.48643	6.65393
100855	chr5-340	chr5	36530353	36530623	+	16	0.684	5' UTR (NM_001113364, exon 1 of 12)	5' UTR (NM_001113364, exon 1 of 12)	135	NM_001113364	Mm.486203	NM_133910	ENSMUSG00000029192	Tbc1d14	2810413P16Rik|AU043625|C86258|D5Ertd110e|mKIAA1322	TBC1 domain family, member 14	protein-coding	Tbc1d14	10529549	0.271867	0.0257197	24	7	0.134704	6.5539	6.8016	6.69075	6.61278	6.5503	6.50714
20851	chr11-386	chr11	100850349	100850619	+	17.5	0.591	5' UTR (NM_001113563, exon 1 of 19)	5' UTR (NM_001113563, exon 1 of 19)	101	NM_001113563	Mm.34064	NM_011489	ENSMUSG00000020919	Stat5b	-	signal transducer and activator of transcription 5B	protein-coding	Stat5b	10391286	0.167635	0.011578	24	11	0.052538	10.4124	10.4355	10.4557	10.4867	10.4554	10.3692
76499	chr9-603	chr9	113741510	113741780	+	12.4	0.618	5' UTR (NM_001114347, exon 1 of 40)	5' UTR (NM_001114347, exon 1 of 40)	172	NM_001286599	Mm.222272	NM_029633	ENSMUSG00000033392	Clasp2	1500004F14Rik|8030404L10Rik|C77448|CLASP2beta|mKIAA0627	CLIP associating protein 2	protein-coding	Clasp2	10589800	0.555588	0.0902228	24	10	0.0512157	9.42328	9.47394	9.59447	9.61784	9.51037	9.36687
227120	chr1-495	chr1	55406157	55406427	+	13.9	0.543	5' UTR (NM_001114663, exon 1 of 6)	5' UTR (NM_001114663, exon 1 of 6)	346	NM_001114663	Mm.194183	NM_001114663	ENSMUSG00000038349	Plcl1	C230017K02Rik|PLC-L|PLC-L1|PLCE|PLCL|PLDL1|PRIP|PRIP-1	phospholipase C-like 1	protein-coding	Plcl1	10346330	1	0.610752	24	16	0.0495965	118.275	113.688	116.189	127.501	124.926	130.544
12593	chr13-226	chr13	35741512	35741782	+	16.8	0.674	5' UTR (NM_001123386, exon 1 of 7)	5' UTR (NM_001123386, exon 1 of 7)	245	NM_001123386	Mm.29002	NM_009881	ENSMUSG00000059288	Cdyl	AI325931	chromodomain protein, Y chromosome-like	protein-coding	Cdyl	10404578	1	0.886572	12	2	0	5.84579	5.72232	5.83142	5.8122	5.84401	5.7437
433022	chr16-83	chr16	46010106	46010376	+	19	0.714	5' UTR (NM_001134480, exon 1 of 4)	5' UTR (NM_001134480, exon 1 of 4)	172	NM_001134480	Mm.380993	NM_001134480	ENSMUSG00000087141	Plcxd2	AW494639|EG433022	phosphatidylinositol-specific phospholipase C, X domain containing 2	protein-coding	Plcxd2	10439732	1	1	20	7.5	0	58.5185	59.0371	48.7476	63.4558	55.7689	57.8213
67547	chr3-743	chr3	135826219	135826489	+	8.75	0.636	5' UTR (NM_001135150, exon 2 of 9)	5' UTR (NM_001135150, exon 2 of 9)	564	NM_001135150	Mm.30239	NM_026228	ENSMUSG00000053897	Slc39a8	4933419D20Rik|AA986696|BIGM103|ZIP-8|Zip8	solute carrier family 39 (metal ion transporter), member 8	protein-coding	Slc39a8	10496324	1	0.886572	12	8	0.0221395	5.47142	5.64031	5.47579	5.42287	5.92368	5.68499
544717	chr10-112	chr10	82622832	82623102	+	22.6	0.76	5' UTR (NM_001135567, exon 1 of 3)	5' UTR (NM_001135567, exon 1 of 3)	261	NM_001135569	Mm.334867	NM_001135567	ENSMUSG00000063320	1190007I07Rik	-	RIKEN cDNA 1190007I07 gene	protein-coding	1190007I07Rik	10371293	1	0.693388	24	14	0.0552604	8.3302	8.05935	8.28362	8.21932	8.0886	8.27175
233056	chr7-472	chr7	29816054	29816324	+	13.9	0.667	5' UTR (NM_001145880, exon 1 of 5)	5' UTR (NM_001145880, exon 1 of 5)	117	NM_146185	Mm.224766	NM_146185	ENSMUSG00000011427	Zfp790	6330581L23Rik	zinc finger protein 790	protein-coding	Zfp790	10551777	1	0.410551	12	1	0.13766	133.916	116.231	98.2551	126.708	129.961	127.404
227545	chr2-1142	chr2	6129892	6130162	+	10.2	0.783	5' UTR (NM_001159657, exon 1 of 4)	5' UTR (NM_001159657, exon 1 of 4)	158	NM_144883	Mm.133542	NM_144883	ENSMUSG00000045319	Proser2	5430407P10Rik|AU067770	proline and serine rich 2	protein-coding	5430407P10Rik	10479925	1	0.357622	12	6	0.114148	6.35453	6.19897	6.34129	6.27513	6.4088	6.26467
100494	chr5-227	chr5	139484249	139484519	+	17.5	0.635	5' UTR (NM_001159908, exon 1 of 7)	5' UTR (NM_001159908, exon 1 of 7)	107	NM_133349	Mm.24521	NM_133349	ENSMUSG00000053581	Zfand2a	AA407930|AU016206|Airap	zinc finger, AN1-type domain 2A	protein-coding	Zfand2a	10535095	1	1	20	11.1667	0.114481	551.012	474.887	561.312	653.988	579.755	688.022
74018	chr1-715	chr1	59236853	59237123	+	11.7	0.633	5' UTR (NM_001159948, exon 1 of 34)	5' UTR (NM_001159948, exon 1 of 34)	105	NM_001159948	Mm.272078	NM_028717	ENSMUSG00000026024	Als2	3222402C23Rik|9430073A21Rik|Als2cr6|Alsin|mKIAA1563	amyotrophic lateral sclerosis 2 (juvenile)	protein-coding	Als2	10354979	1	1	20	9.83333	0.0332639	7.86942	7.76676	7.82024	7.8813	7.93748	7.83257
75717	chr9-87	chr9	53667269	53667539	+	24.1	0.703	5' UTR (NM_001161618, exon 1 of 18)	5' UTR (NM_001161618, exon 1 of 18)	103	NM_001161618	Mm.218910	NM_027807	ENSMUSG00000032030	Cul5	4921514I20Rik|8430423K24Rik|AI852817|C030032G03Rik|C330021I08Rik|VACM-1|VACM1	cullin 5	protein-coding	Cul5	10593605	0.608446	0.10647	12	1.5	0.0949291	10.1678	10.0499	9.97784	10.1212	10.0918	10.0327
59040	chr11-344	chr11	80209086	80209356	+	17.5	0.673	5' UTR (NM_001163354, exon 1 of 20)	5' UTR (NM_001163354, exon 1 of 20)	166	NM_001163354	Mm.489674	NM_021536	ENSMUSG00000017686	Rhot1	2210403N23Rik|AA415293|AF244542|AI834919|Arht1|C430039G08Rik|Miro1	ras homolog family member T1	protein-coding	Rhot1	10379410	0.0966279	0.00488493	12	1	0.0492005	9.06239	9.02009	9.00541	9.09544	8.9964	9.05245
74493	chr19-176	chr19	36834218	36834488	+	17.5	0.604	5' UTR (NM_001163635, exon 1 of 27)	5' UTR (NM_001163635, exon 1 of 27)	121	NM_001163635	Mm.249310	NM_001163635	ENSMUSG00000024811	Tnks2	5430432P15Rik|AA517131|AI662480|ARTD6|TNKS-2|Tank2	tankyrase, TRF1-interacting ankyrin-related ADP-ribose polymerase 2	protein-coding	Tnks2	10462724	0.304521	0.0311014	24	7	0.0328098	1490.21	1598.39	1474.08	1555.86	1436.16	1489.49
50762	chr4-260	chr4	148151629	148151899	+	18.2	0.62	5' UTR (NM_001163704, exon 1 of 6)	5' UTR (NM_001163704, exon 1 of 6)	161	NM_001163704	Mm.27445	NM_015797	ENSMUSG00000055401	Fbxo6	AA408845|FBG2|Fbs2|Fbx6b|Fbxo6b	F-box protein 6	protein-coding	Fbxo6	10518473	1	0.536501	12	10	0.0604117	8.16087	7.87838	7.94849	7.95893	7.94599	8.0689
75304	chr11-212	chr11	72215144	72215414	+	23.3	0.58	5' UTR (NM_001163728, exon 1 of 1)	5' UTR (NM_001163728, exon 1 of 1)	141	NM_001163728	Mm.340776	NM_001163728		4930563E22Rik	-	RIKEN cDNA 4930563E22 gene	protein-coding	4930563E22Rik	10378065	1	1	20	11.8333	0.00654074	53.2264	39.0035	47.483	47.486	55.4594	48.6015
381921	chr7-161	chr7	126884731	126885001	+	18.2	0.646	5' UTR (NM_001163775, exon 1 of 16)	5' UTR (NM_001163775, exon 1 of 16)	101	NM_001163774	Mm.259634	NM_001163774	ENSMUSG00000059981	Taok2	1110033K02Rik|B230344N16|MAP3K17|PSK|PSK1|TAO1|TAO2|mKIAA0881	TAO kinase 2	protein-coding	Taok2	10568078	1	0.357622	12	2	0.0542634	194.816	203.801	193.244	200.684	199.093	188.393
24135	chr5-244	chr5	138619486	138619756	+	19	0.667	5' UTR (NM_001163797, exon 1 of 6)	5' UTR (NM_001163797, exon 1 of 6)	122	NM_013844	Mm.27575	NM_013844	ENSMUSG00000058291	Zfp68	KRAB3|KRAZ2|Zfp70|mszf22|mszf49	zinc finger protein 68	protein-coding	Zfp68	10535034	1	0.469977	24	16.5	0.0792066	472.349	438.545	507.903	497.999	477.819	535.388
67338	chr11-505	chr11	82845736	82846006	+	16	0.707	5' UTR (NM_001164569, exon 2 of 8)	5' UTR (NM_001164569, exon 2 of 8)	-16828	NM_026097	Mm.341608	NM_026097	ENSMUSG00000020696	Rffl	1700051E09Rik|4930516L10Rik|BG080975|Carp2	ring finger and FYVE like domain containing protein	protein-coding	Rffl	10389087	0.994691	0.269008	12	0	0.082583	145.041	133.274	148.457	150.33	144.219	143.781
76857	chr2-1280	chr2	23571785	23572055	+	10.2	0.842	5' UTR (NM_001165997, exon 1 of 12)	5' UTR (NM_001165997, exon 1 of 12)	184	NM_001165997	Mm.276415	NM_029773	ENSMUSG00000026771	Spopl	4921517N04Rik|AU014935|BB233739|E430033K04Rik	speckle-type POZ protein-like	protein-coding	Spopl	10480445	0.460888	0.0641441	12	2	0.116043	7.61232	7.6823	7.51819	7.72435	7.74896	7.59104
74125	chr9-492	chr9	99568524	99568794	+	12.4	0.5	5' UTR (NM_001166138, exon 1 of 12)	5' UTR (NM_001166138, exon 1 of 12)	240	NM_028768	Mm.234823	NM_028768	ENSMUSG00000032468	Armc8	1200015K23Rik|Gid5|HSPC056	armadillo repeat containing 8	protein-coding	Armc8	10595990	0.922182	0.232281	12	0	0.0598566	485.777	475.14	492.091	478.488	457.732	485.817
65099	chr9-392	chr9	82829822	82830092	+	14.6	0.629	5' UTR (NM_001168240, exon 1 of 3)	5' UTR (NM_001168240, exon 1 of 3)	151	NM_001168240	Mm.41415	NM_022986	ENSMUSG00000032251	Irak1bp1	4921528N06Rik|AI851240|Aabp3|Aip70|Simpl	interleukin-1 receptor-associated kinase 1 binding protein 1	protein-coding	Irak1bp1	10587495	1	0.998554	12	2	0.0515976	6.52233	6.43794	6.38256	6.43879	6.55154	6.67825
75725	chr6-875	chr6	11926076	11926346	+	10.9	0.562	5' UTR (NM_001168382, exon 1 of 18)	5' UTR (NM_001168382, exon 1 of 18)	330	NM_029404	Mm.212411	NM_029404	ENSMUSG00000029629	Phf14	1110001C23Rik|4932409F11Rik|5730446A07Rik|AA623952|AV297001|mKIAA0783	PHD finger protein 14	protein-coding	Phf14	10536407	1	1	20	11.1667	0.0359744	222.622	223.345	218.383	230.728	231.495	243.637
192196	chr6-189	chr6	38551433	38551703	+	19.7	0.646	5' UTR (NM_001170849, exon 1 of 8)	5' UTR (NM_001170849, exon 1 of 8)	234	NM_001311099	Mm.276133	NM_138680	ENSMUSG00000029823	Luc7l2	4930471C18Rik|AA522013|AU015269|CGI59|Cgi74	LUC7-like 2 (S. cerevisiae)	protein-coding	Luc7l2	10537397	1	0.410551	24	16.5	0.014531	10.0376	9.96803	10.1618	10.0417	10.2275	10.0682
229776	chr3-52	chr3	116423701	116423971	+	21.9	0.6	5' UTR (NM_001173553, exon 1 of 14)	5' UTR (NM_001173553, exon 1 of 14)	196	NM_001173553	Mm.17647	NM_001080818	ENSMUSG00000033502	Cdc14a	A830059A17Rik|CDC14A2|CDC14a1|Cdc14	CDC14 cell division cycle 14A	protein-coding	Cdc14a	10501629	0.00543649	7.11e-05	24	20	0.274605	9.47608	9.32924	8.84603	9.27621	9.50537	9.74738
224826	chr17-65	chr17	47010243	47010513	+	24.1	0.618	5' UTR (NM_001177374, exon 1 of 47)	5' UTR (NM_001177374, exon 1 of 47)	154	NM_146078	Mm.28234	NM_146078	ENSMUSG00000023977	Ubr2	9930021A08Rik|AI462103|AW540746|E130209G04Rik|ENSMUSG00000043296|mKIAA0349	ubiquitin protein ligase E3 component n-recognin 2	protein-coding	Ubr2	10451495	1	1	20	9.83333	0.0325858	1033.27	988.708	1009.48	961.431	1004.3	1024.14
239099	chr14-210	chr14	54863905	54864175	+	14.6	0.737	5' UTR (NM_001177705, exon 1 of 2)	5' UTR (NM_001177705, exon 1 of 2)	118	NM_001177705	Mm.280994	NM_183174	ENSMUSG00000057156	Homez	mKIAA1443	homeodomain leucine zipper-encoding gene	protein-coding	Homez	10419867	1	1	20	10.5	0.0299743	6.42767	6.68262	6.63777	6.43562	6.61598	6.50733
68149	chr12-295	chr12	103388689	103388959	+	13.1	0.639	5' UTR (NM_001177841, exon 1 of 7)	5' UTR (NM_001177841, exon 1 of 7)	142	NM_001177841	Mm.127378	NM_026580	ENSMUSG00000021203	Otub2	2010015L18Rik|4930586I02Rik|AI413508|AW557219|OTB2|OTU2	OTU domain, ubiquitin aldehyde binding 2	protein-coding	Otub2	10397966	0.000358582	1.49e-06	24	5	0.426675	8.10948	8.41844	8.40733	7.95185	7.54993	7.82951
65973	chr4-75	chr4	9668888	9669158	+	22.6	0.618	5' UTR (NM_001177850, exon 1 of 14)	5' UTR (NM_001177850, exon 1 of 14)	139	NM_001177851	Mm.222206	NM_023066	ENSMUSG00000028207	Asph	2310005F16Rik|3110001L23Rik|AI848629|AW261690|AW561901|BAH|C79816|cI-37	aspartate-beta-hydroxylase	protein-coding	Asph	10511446	0.146865	0.00939007	24	7	0.0675216	9.23641	9.40713	9.47199	9.43999	9.31164	9.35856
13418	chr2-110	chr2	18392407	18392677	+	21.1	0.632	5' UTR (NM_001190817, exon 1 of 13)	5' UTR (NM_001190817, exon 1 of 13)	288	NM_001190817	Mm.246674	NM_007869	ENSMUSG00000026740	Dnajc1	4733401K02Rik|AA960110|D230036H06Rik|Dnajl1|ERdj1|ERj1p|MTJ1	DnaJ heat shock protein family (Hsp40) member C1	protein-coding	Dnajc1	10480329	0.555588	0.0902228	12	0	0.106116	6.93133	6.93416	6.79831	7.09875	6.90931	6.95701
14768	chr1-986	chr1	67038540	67038810	+	10.9	0.69	5' UTR (NM_001190985, exon 1 of 9)	5' UTR (NM_001190985, exon 1 of 9)	159	NM_001190984	Mm.20522	NM_021295	ENSMUSG00000026000	Lancl1	AW124738|Gpr69|Gpr69a|p40	LanC (bacterial lantibiotic synthetase component C)-like 1	protein-coding	Lancl1	10355266	1	0.31062	12	11	0.0510319	9.4874	9.39474	9.45945	9.46379	9.53792	9.53561
217127	chr11-211	chr11	95309982	95310252	+	21.1	0.565	5' UTR (NM_001195004, exon 1 of 14)	5' UTR (NM_001195004, exon 1 of 14)	129	NM_001195004	Mm.90213	NM_177619	ENSMUSG00000038909	Kat7	Hbo1|Hboa|Myst2	K(lysine) acetyltransferase 7	protein-coding	Myst2	10390153	0.377948	0.044983	12	0.5	0.0362463	8.92522	8.79847	8.9253	8.90929	8.8906	8.95924
66092	chr14-596	chr14	37134878	37135148	+	10.2	0.5	5' UTR (NM_001199122, exon 1 of 9)	5' UTR (NM_001199122, exon 1 of 9)	126	NM_001199122	Mm.182912	NM_078478	ENSMUSG00000041028	Ghitm	1010001P14Rik|C77840|MICS1|PTD010|Tmbim5	growth hormone inducible transmembrane protein	protein-coding	Ghitm	10419038	0.786454	0.171619	12	1	0.0478004	10.7659	10.7455	10.8249	10.8349	10.815	10.8126
14048	chr1-1399	chr1	14309756	14310026	+	9.48	0.714	5' UTR (NM_001252192, exon 1 of 17)	5' UTR (NM_001252192, exon 1 of 17)	308	NM_001310459	Mm.250185	NM_010164	ENSMUSG00000025932	Eya1	bor	EYA transcriptional coactivator and phosphatase 1	protein-coding	Eya1	10353192	0.0712878	0.00309146	24	7	0.0661357	9.68762	9.7163	9.82775	9.7657	9.45626	9.59281
109272	chr10-694	chr10	88604903	88605173	+	11.7	0.739	5' UTR (NM_001252372, exon 1 of 29)	5' UTR (NM_001252372, exon 1 of 29)	114	NM_175418	Mm.147208	NM_175418	ENSMUSG00000020061	Mybpc1	8030451F13Rik	myosin binding protein C, slow-type	protein-coding	Mybpc1	10371627	1	0.469977	24	14	0.187171	3057.21	2661.27	4220.51	3446.46	3173.37	3034.62
67283	chr11-537	chr11	115627982	115628252	+	16.8	0.721	5' UTR (NM_001252384, exon 1 of 8)	5' UTR (NM_001252384, exon 1 of 8)	178	NM_001252395	Mm.383426	NM_026071	ENSMUSG00000020744	Slc25a19	2900089E13Rik|DNC|MUP1|TPC	solute carrier family 25 (mitochondrial thiamine pyrophosphate carrier), member 19	protein-coding	Slc25a19	10392983	0.505682	0.0762022	24	9	0.0472277	8.08919	7.86371	8.01998	8.14769	7.96398	7.80708
21787	chr16-46	chr16	56717198	56717468	+	21.1	0.61	5' UTR (NM_001252443, exon 1 of 7)	5' UTR (NM_001252443, exon 1 of 7)	117	NM_001252443	Mm.425970	NM_019678	ENSMUSG00000022757	Tfg	AI173908	Trk-fused gene	protein-coding	Tfg	10439991	0.304521	0.0311014	12	9	0.0463862	10.3168	10.2493	10.4862	10.4428	10.2461	10.4754
64291	chr18-134	chr18	12862036	12862306	+	15.3	0.569	5' UTR (NM_001252492, exon 1 of 14)	5' UTR (NM_001252492, exon 1 of 14)	542	NM_001252491	Mm.259470	NM_020573	ENSMUSG00000044252	Osbpl1a	G430090F17Rik|Gm753|ORP-1|Osbpl1b	oxysterol binding protein-like 1A	protein-coding	Osbpl1a	10457546	0.242857	0.0211898	24	13	0.105514	7.6073	7.6375	7.77939	7.77508	7.71055	7.64811
216549	chr11-703	chr11	20741233	20741503	+	14.6	0.545	5' UTR (NM_001252503, exon 1 of 8)	5' UTR (NM_001252503, exon 1 of 8)	188	NM_001290545	Mm.356580	NM_181411	ENSMUSG00000049659	Aftph	-	aftiphilin	protein-coding	Aftph	10384555	0.994691	0.269008	12	2	0.138084	8.50839	8.72159	8.51008	8.73971	8.46777	8.54828
12163	chr4-194	chr4	123342661	123342931	+	17.5	0.653	5' UTR (NM_001256019, exon 1 of 7)	5' UTR (NM_001256019, exon 1 of 7)	456	NM_001256019	Mm.439749	NM_007558	ENSMUSG00000032726	Bmp8a	Bmp7r1|OP-2|OP2	bone morphogenetic protein 8a	protein-coding	Bmp8a	10516093	1	1	20	11.5	0.0261307	6.42863	5.90626	6.01646	6.08285	6.00384	6.16081
18393	chr1-374	chr1	58504766	58505036	+	15.3	0.632	5' UTR (NM_001271526, exon 1 of 18)	5' UTR (NM_001271526, exon 1 of 18)	208	NM_001271526	Mm.3411	NM_008765	ENSMUSG00000026037	Orc2	AU041563|Orc2l	origin recognition complex, subunit 2	protein-coding	Orc2	10354845	1	0.998554	12	1	0.0458064	7.58386	7.62423	7.63175	7.61752	7.61137	7.70698
12545	chr5-262	chr5	106964570	106964840	+	16.8	0.6	5' UTR (NM_001271566, exon 1 of 12)	5' UTR (NM_001271566, exon 1 of 12)	144	NM_001271566	Mm.20842	NM_009863	ENSMUSG00000029283	Cdc7	AI597260|Cdc7l1|muCdc7	cell division cycle 7 (S. cerevisiae)	protein-coding	Cdc7	10523802	0.505682	0.0762022	12	7	0.013329	4.41241	4.49729	4.42417	4.25922	4.4364	4.62745
22433	chr11-114	chr11	5520624	5520894	+	25.5	0.677	5' UTR (NM_001271730, exon 1 of 6)	5' UTR (NM_001271730, exon 1 of 6)	118	NM_013842	Mm.469937	NM_013842	ENSMUSG00000020484	Xbp1	D11Ertd39e|TREB-5|TREB5|XBP-1	X-box binding protein 1	protein-coding	Xbp1	10374035	1	1	20	8.5	0.017772	924.789	920.453	877.515	928.656	887.553	880.403
21339	chr1-708	chr1	183388956	183389226	+	13.9	0.556	5' UTR (NM_001277959, exon 1 of 11)	5' UTR (NM_001277959, exon 1 of 11)	106	NM_001277958	Mm.383556	NM_021466	ENSMUSG00000072258	Taf1a	TAFI48|mTAFI48	TATA-box binding protein associated factor, RNA polymerase I, A	protein-coding	Taf1a	10598107	1	1	20	8.83333	0.0182874	7.91906	7.77794	7.94476	8.03801	7.82338	8.06648
26611	chr9-570	chr9	56041910	56042180	+	12.4	0.579	5' UTR (NM_001278274, exon 1 of 2)	5' UTR (NM_001278274, exon 1 of 2)	200	NM_011992	Mm.1782	NM_011992	ENSMUSG00000032320	Rcn2	AA408742|Tcbp49	reticulocalbin 2	protein-coding	Rcn2	10585545	1	1	20	11.8333	0.0246545	219.262	236.078	226.549	230.252	251.456	247.081
18441	chr3-793	chr3	61002847	61003117	+	9.48	0.516	5' UTR (NM_001282016, exon 1 of 2)	5' UTR (NM_001282016, exon 1 of 2)	197	NM_008772	Mm.281452	NM_008772	ENSMUSG00000027765	P2ry1	P2Y1	purinergic receptor P2Y, G-protein coupled 1	protein-coding	P2ry1	10492330	0.66424	0.125235	12	11	0.0809142	227.129	184.155	234.116	206.201	209.084	184.182
78783	chr6-172	chr6	113307111	113307381	+	19.7	0.611	5' UTR (NM_001282127, exon 1 of 14)	5' UTR (NM_001282127, exon 1 of 14)	109	NM_001282126	Mm.356059	NM_030178	ENSMUSG00000001632	Brpf1	4833438B11Rik|4930540D11Rik|Brpf2	bromodomain and PHD finger containing, 1	protein-coding	Brpf1	10540622	1	1	20	7.5	0.0115086	7.80188	7.74291	7.81009	7.89404	7.71161	7.74555
56403	chr9-150	chr9	88482131	88482401	+	19.7	0.615	5' UTR (NM_001284328, exon 1 of 12)	5' UTR (NM_001284328, exon 1 of 12)	131	NM_019666	Mm.260545	NM_019666	ENSMUSG00000032423	Syncrip	2610109K23Rik|4632417O19Rik|GRY-RBP|Nsap1|Nsap1l|hnRNP Q|pp68	synaptotagmin binding, cytoplasmic RNA interacting protein	protein-coding	Syncrip	10595604	1	0.886572	12	2	0.00512652	990.278	1042.91	996.13	1065.64	1025.14	1002.84
218734	chr14-303	chr14	12284198	12284468	+	13.1	0.69	5' UTR (NM_001284385, exon 1 of 5)	5' UTR (NM_001284385, exon 1 of 5)	130	NM_178141	Mm.44068	NM_146051	ENSMUSG00000033111	3830406C13Rik	-	RIKEN cDNA 3830406C13 gene	protein-coding	3830406C13Rik	10412701	1	1	20	7.5	0.0059342	7.56668	7.61507	7.67172	7.61856	7.66482	7.60324
67878	chr5-596	chr5	67260787	67261057	+	12.4	0.605	5' UTR (NM_001285452, exon 1 of 7)	5' UTR (NM_001285452, exon 1 of 7)	357	NM_030108	Mm.23217	NM_028975	ENSMUSG00000037720	Tmem33	1110006G02Rik|1600019D15Rik|2410089A21Rik|2700052H22Rik|5430406L04Rik|AA388285|AI314185|AI426615|db83	transmembrane protein 33	protein-coding	Tmem33	10522250	1	0.998554	24	4.5	0	7.96697	7.95076	8.02418	7.96839	7.95477	7.96722
22670	chr17-375	chr17	36837145	36837415	+	12.4	0.636	5' UTR (NM_001286726, exon 1 of 10)	5' UTR (NM_001286726, exon 1 of 10)	134	NM_001286727	Mm.34587	NM_030698	ENSMUSG00000024457	Trim26	AI462198|Zfp173|Zfp1736	tripartite motif-containing 26	protein-coding	Trim26	10445033	0.505682	0.0762022	12	0	0.113674	6.56975	6.2367	6.36579	6.39128	6.29049	6.39911
27049	chr3-385	chr3	87525792	87526062	+	13.1	0.647	5' UTR (NM_001286844, exon 1 of 5)	5' UTR (NM_001286844, exon 1 of 5)	349	NM_001083318	Mm.219460	NM_012051	ENSMUSG00000003382	Etv3	AI414410|METS|Pe1	ets variant 3	protein-coding	Etv3	10492997	0.377948	0.044983	12	3	0.127866	7.78922	7.91719	7.662	7.83576	8.03574	7.69715
18741	chr3-686	chr3	129214073	129214343	+	10.2	0.655	5' UTR (NM_001287048, exon 1 of 3)	5' UTR (NM_001287048, exon 1 of 3)	276	NM_001042502	Mm.246804	NM_011098	ENSMUSG00000028023	Pitx2	9430085M16Rik|Brx1|Brx1b|Munc30|Otlx2|Ptx2|Rieg	paired-like homeodomain transcription factor 2	protein-coding	Pitx2	10495976	1	1	20	10.5	0.0559604	6.09289	5.89699	6.41533	6.19147	6.09356	6.04847
76223	chr6-401	chr6	34780556	34780826	+	14.6	0.611	5' UTR (NM_001289656, exon 1 of 20)	5' UTR (NM_001289656, exon 1 of 20)	259	NM_001289657	Mm.150047	NM_178630	ENSMUSG00000038836	Agbl3	2900053G10Rik|4930431N21Rik|6530406M24Rik|CCP3	ATP/GTP binding protein-like 3	protein-coding	Agbl3	10537204	0.852649	0.199965	12	8	0.0348038	4.89601	4.76601	4.94523	4.90548	4.82334	4.9614
68235	chr6-353	chr6	54681608	54681878	+	15.3	0.69	5' UTR (NM_001289741, exon 1 of 5)	5' UTR (NM_001289741, exon 1 of 5)	119	NM_001289741	Mm.233860	NM_026629	ENSMUSG00000038065	Mturn	2410066E13Rik|AI448550|B230212L03Rik	maturin, neural progenitor differentiation regulator homolog (Xenopus)	protein-coding	2410066E13Rik	10538408	1	0.469977	24	3.5	0.080688	6.76541	6.80313	6.64924	6.57009	6.57395	6.57618
71354	chr4-922	chr4	62470642	62470912	+	10.9	0.882	5' UTR (NM_001290521, exon 1 of 11)	5' UTR (NM_001290521, exon 1 of 11)	118	NM_001290521	Mm.155573	NM_023597	ENSMUSG00000028391	Wdr31	5430402I10Rik|spWD	WD repeat domain 31	protein-coding	Wdr31	10513592	1	0.693388	24	0	0	5.36281	5.08097	5.27698	5.18083	5.29819	5.18901
67694	chr4-794	chr4	94614487	94614757	+	11.7	0.69	5' UTR (NM_001290568, exon 1 of 14)	5' UTR (NM_001290568, exon 1 of 14)	131	NM_001290568	Mm.240619	NM_026319	ENSMUSG00000028576	Ift74	1700029H06Rik|Ccdc2|Cmg1|b2b796Clo	intraflagellar transport 74	protein-coding	Ift74	10505931	1	1	20	9.16667	0.0197267	5.17094	5.06747	5.17202	5.23909	5.17898	5.25366
75712	chr1-924	chr1	21218584	21218854	+	10.9	0.773	5' UTR (NM_001290679, exon 1 of 5)	5' UTR (NM_001290679, exon 1 of 5)	144	NM_029398	Mm.304763	NM_029398	ENSMUSG00000025933	Tmem14a	5730496E24Rik|C85783|PTD011	transmembrane protein 14A	protein-coding	Tmem14a	10345058	0.994691	0.269008	24	1.5	0.0829366	45.9936	46.0909	47.8909	42.8915	40.4478	52.9813
229905	chr3-244	chr3	142701023	142701293	+	15.3	0.697	5' UTR (NM_001293560, exon 1 of 14)	5' UTR (NM_001293560, exon 1 of 14)	110	NM_173763	Mm.289643	NM_173763	ENSMUSG00000040213	Kyat3	Ccbl2|KATIII|Kat3	kynurenine aminotransferase 3	protein-coding	Ccbl2	10496605	0.66424	0.125235	12	0	0.0878509	6.81867	6.80854	7.04395	6.98949	6.94507	6.96756
18004	chr8-339	chr8	60993162	60993432	+	15.3	0.578	5' UTR (NM_001293639, exon 1 of 32)	5' UTR (NM_001293639, exon 1 of 32)	104	NM_175089	Mm.486881	NM_175089	ENSMUSG00000031644	Nek1	D8Ertd790e|kat	NIMA (never in mitosis gene a)-related expressed kinase 1	protein-coding	Nek1	10571922	1	0.31062	24	12	0.0210647	123.207	120.605	141.447	160.127	133.936	138.754
108058	chr3-89	chr3	126597262	126597532	+	19	0.667	5' UTR (NM_001293663, exon 1 of 20)	5' UTR (NM_001293663, exon 1 of 20)	446	NM_001025439	Mm.255822	NM_023813	ENSMUSG00000053819	Camk2d	2810011D23Rik|8030469K03Rik|CaMK II|[d]-CaMKII	calcium/calmodulin-dependent protein kinase II, delta	protein-coding	Camk2d	10495896	0.922182	0.232281	24	8	0.0165392	9.44638	9.45713	9.29324	9.47954	9.38928	9.232
215031	chr10-1158	chr10	52022552	52022822	+	8.75	0.7	5' UTR (NM_001300957, exon 1 of 3)	5' UTR (NM_001300957, exon 1 of 3)	185	NM_001300957	Mm.87237	NM_153786	ENSMUSG00000049641	Vgll2	C130057C21Rik|VITO-1|Vito1|vgl-2	vestigial like family member 2	protein-coding	Vgll2	10363112	0.505682	0.0762022	12	11	0.234052	8.54812	8.31244	8.93445	8.87503	8.4832	8.51591
22200	chr6-607	chr6	97205000	97205270	+	10.9	0.68	5' UTR (NM_001301857, exon 2 of 18)	5' UTR (NM_001301857, exon 2 of 18)	512	NM_001301859	Mm.277626	NM_011666	ENSMUSG00000030061	Uba3	A830034N06Rik|AI256736|AI848246|AW546539|Ube1c	ubiquitin-like modifier activating enzyme 3	protein-coding	Uba3	10546606	1	1	20	8.5	0.0262667	9.5588	9.51731	9.64223	9.63086	9.58951	9.55519
14339	chr8-205	chr8	91133766	91134036	+	19.7	0.565	5' UTR (NM_001302337, exon 1 of 10)	5' UTR (NM_001302337, exon 1 of 10)	126	NM_001302266	Mm.324588	NM_010241	ENSMUSG00000031667	Aktip	AL023020|Fif|Ft|Ft1|Fts	thymoma viral proto-oncogene 1 interacting protein	protein-coding	Aktip	10580537	0.922182	0.232281	12	1	0.076813	9.3562	9.2305	9.33089	9.36072	9.39845	9.35367
70892	chr3-166	chr3	146852443	146852713	+	16	0.571	5' UTR (NM_001302958, exon 1 of 15)	5' UTR (NM_001302958, exon 1 of 15)	211	NM_001302958	Mm.187793	NM_027594	ENSMUSG00000036745	Ttll7	1110049N09Rik|4921517B04Rik|C630030B20|mTTLL7	tubulin tyrosine ligase-like family, member 7	protein-coding	Ttll7	10496837	0.66424	0.125235	24	5	0.0429921	10.0948	10.1329	9.91354	9.97825	10.0799	10.087
70892	chr3-166	chr3	146852443	146852713	+	16	0.571	5' UTR (NM_001302958, exon 1 of 15)	5' UTR (NM_001302958, exon 1 of 15)	211	NM_001302958	Mm.187793	NM_027594	ENSMUSG00000036745	Ttll7	1110049N09Rik|4921517B04Rik|C630030B20|mTTLL7	tubulin tyrosine ligase-like family, member 7	protein-coding	Ttll7	10496854	1	0.610752	20	5.66667	0.00605755	10.7165	10.6952	10.5267	10.6851	10.6882	10.6946
15574	chr11-1945	chr11	9010881	9011151	+	8.75	0.538	5' UTR (NM_001303610, exon 1 of 7)	5' UTR (NM_001303610, exon 1 of 7)	175	NM_001303610	Mm.42201	NM_008316	ENSMUSG00000020413	Hus1	-	HUS1 checkpoint clamp component	protein-coding	Hus1	10384322	0.608446	0.10647	12	1	0.146173	8.46885	8.31564	8.49657	8.60195	8.44726	8.43181
68178	chr9-215	chr9	71771203	71771473	+	17.5	0.711	5' UTR (NM_001304362, exon 1 of 19)	5' UTR (NM_001304362, exon 1 of 19)	264	NM_026599	Mm.99961	NM_026599	ENSMUSG00000032232	Cgnl1	4933421H10Rik|9930020M10Rik|AI503810|Jacop	cingulin-like 1	protein-coding	Cgnl1	10594855	1	1	20	12.5	0.00557357	67.9928	67.8511	66.1409	63.1552	67.167	70.129
11800	chr2-1324	chr2	94437867	94438137	+	10.2	0.607	5' UTR (NM_001305258, exon 1 of 14)	5' UTR (NM_001305258, exon 1 of 14)	184	NM_007466	Mm.181824	NM_007466	ENSMUSG00000027193	Api5	AAC-11|AI196452|API-5	apoptosis inhibitor 5	protein-coding	Api5	10485344	1	0.357622	24	5	0	234.67	228.062	212.76	212.003	220.697	216.656
17475	chr4-1587	chr4	81442538	81442808	+	8.75	0.565	5' UTR (NM_001305286, exon 1 of 46)	5' UTR (NM_001305286, exon 1 of 46)	142	NM_010820	Mm.153039	NM_010820	ENSMUSG00000028402	Mpdz	AI225843|B930003D11Rik|MUPP1	multiple PDZ domain protein	protein-coding	Mpdz	10514000	0.555588	0.0902228	20	6.66667	0.0477344	347.406	330.994	348.25	379.78	332.597	317.275
74370	chr11-990	chr11	119602883	119603153	+	12.4	0.667	5' UTR (NM_001306081, exon 1 of 33)	5' UTR (NM_001306081, exon 1 of 33)	113	NM_028898	Mm.209933	NM_028898	ENSMUSG00000025583	Rptor	4932417H02Rik|Rap|Raptor|mKIAA1303	regulatory associated protein of MTOR, complex 1	protein-coding	Rptor	10383245	0.723213	0.146835	12	0	0	249.176	257.452	282.375	298.763	228.688	252.301
223922	chr15-77	chr15	102625168	102625438	+	21.9	0.521	5' UTR (NM_001310070, exon 1 of 12)	5' UTR (NM_001310070, exon 1 of 12)	161	NM_001310067	Mm.208714	NM_146065	ENSMUSG00000052414	Atf7	1110012F10Rik|9430065F09Rik|AI549878|C130020M04Rik	activating transcription factor 7	protein-coding	Atf7	10433034	1	0.998554	24	13	0.0669913	9.42375	9.55325	9.71736	9.59004	9.54535	9.60661
26419	chr14-329	chr14	33446918	33447188	+	12.4	0.6	5' UTR (NM_001310453, exon 1 of 12)	5' UTR (NM_001310453, exon 1 of 12)	105	NM_001310453	Mm.21495	NM_016700	ENSMUSG00000021936	Mapk8	AI849689|JNK|JNK1|Prkm8|SAPK1	mitogen-activated protein kinase 8	protein-coding	Mapk8	10418879	1	1	20	11.5	0.0269251	8.86869	8.86045	8.74636	8.85504	8.80864	8.94904
98314	chr1-100	chr1	93825380	93825650	+	23.3	0.639	5' UTR (NM_001310767, exon 1 of 10)	5' UTR (NM_001310767, exon 1 of 10)	275	NM_001310767	Mm.383401	NM_178882	ENSMUSG00000073609	D2hgdh	AA408776|AA408778|AI325464	D-2-hydroxyglutarate dehydrogenase	protein-coding	D2hgdh	10348889	1	1	20	8.5	0.0113388	7.56551	7.41588	7.56915	7.4557	7.41318	7.52849
72507	chr9-992	chr9	99629799	99630069	+	9.48	0.565	5' UTR (NM_001311142, exon 1 of 16)	5' UTR (NM_001311142, exon 1 of 16)	356	NM_001311142	Mm.221455	NM_028258	ENSMUSG00000037784	Dzip1l	2610524A10Rik|AI663976	DAZ interacting protein 1-like	protein-coding	Dzip1l	10588137	1	1	20	13.1667	0.0141091	6.24184	5.97639	6.07003	6.02214	6.07509	5.98822
26398	chr11-1059	chr11	65788123	65788393	+	11.7	0.543	5' UTR (NM_001316367, exon 1 of 12)	5' UTR (NM_001316367, exon 1 of 12)	101	NM_009157	Mm.412922	NM_009157	ENSMUSG00000033352	Map2k4	JNKK1|MEK4|MKK4|PRKMK4|Sek1|Serk1	mitogen-activated protein kinase kinase 4	protein-coding	Map2k4	10387014	1	0.357622	12	2	0.133466	968.656	941.841	849.865	936.153	963.306	941.378
70564	chr14-456	chr14	41013591	41013861	+	10.2	0.654	5' UTR (NM_001316734, exon 1 of 6)	5' UTR (NM_001316734, exon 1 of 6)	107	NM_001316735	Mm.27227	NM_027464	ENSMUSG00000021792	Fam213a	5730469M10Rik|AU040822|Adrx|Pamm	family with sequence similarity 213, member A	protein-coding	5730469M10Rik	10419082	1	1	20	11.8333	0.0961351	10.4688	10.5658	10.7818	10.7595	10.5968	10.7748
19944	chr9-278	chr9	106429585	106429855	+	16.8	0.549	5' UTR (NM_001324534, exon 1 of 3)	5' UTR (NM_001324534, exon 1 of 3)	309	NM_009082	Mm.288696	NM_009082	ENSMUSG00000048758	Rpl29	Rpl43	ribosomal protein L29	protein-coding	Rpl29	10345909	1	0.886572	12	9	0	2698.42	2599.65	2514.75	2565.99	2496.86	2754.74
109676	chr3-796	chr3	127408814	127409084	+	9.48	0.6	5' UTR (NM_001327939, exon 1 of 46)	5' UTR (NM_001327939, exon 1 of 46)	109	NM_001327939	Mm.220242	NM_178655	ENSMUSG00000032826	Ank2	100043364|AI835472|AW491075|Ank-2|Gm4392	ankyrin 2, brain	protein-coding	Ank2	10501971	0.0043622	5.2e-05	24	14	0.118313	8.26202	8.23256	8.42934	8.7516	8.42418	8.30059
83965	chr17-977	chr17	44078841	44079111	+	9.48	0.714	5' UTR (NM_001329620, exon 1 of 4)	5' UTR (NM_001329620, exon 1 of 4)	174	NM_001329618	Mm.30145	NM_032003	ENSMUSG00000023960	Enpp5	AW061004|D17Abb1e|E-NPP 5	ectonucleotide pyrophosphatase/phosphodiesterase 5	protein-coding	Enpp5	10445338	1	0.31062	12	1.5	0.0631552	8.33409	8.41283	8.32389	8.47671	8.31237	8.27142
73086	chr12-83	chr12	100724851	100725121	+	19.7	0.638	5' UTR (NM_001330702, exon 1 of 17)	5' UTR (NM_001330702, exon 1 of 17)	134	NM_153587	Mm.220417	NM_153587	ENSMUSG00000021180	Rps6ka5	3110005L17Rik|6330404E13Rik|AI854034|MSK1|MSPK1|RLPK|RLSK|S6K-alpha-5	ribosomal protein S6 kinase, polypeptide 5	protein-coding	Rps6ka5	10402117	1	1	20	8.5	0.0358432	222.87	208.251	261.805	209.721	201.702	223.176
231532	chr5-482	chr5	102845034	102845304	+	14.6	0.793	5' UTR (NM_001346585, exon 1 of 7)	5' UTR (NM_001346585, exon 1 of 7)	162	NM_001346585	Mm.440191	NM_029270	ENSMUSG00000057315	Arhgap24	0610025G21Rik	Rho GTPase activating protein 24	protein-coding	Arhgap24	10523579	0.418067	0.0538095	24	9	0.241109	7.11505	7.41239	7.64889	7.62986	6.97376	7.2335
72306	chr6-492	chr6	48047526	48047796	+	12.4	0.583	5' UTR (NM_001347139, exon 1 of 6)	5' UTR (NM_001347139, exon 1 of 6)	133	NM_001347139	Mm.381553	NM_001081382	ENSMUSG00000071477	Zfp777	2500002G23Rik	zinc finger protein 777	protein-coding	Zfp777	10544547	0.994691	0.269008	24	18	0.0709935	7.3368	7.38167	7.38289	7.53512	7.42604	7.67617
72972	chr14-418	chr14	36919252	36919522	+	11.7	0.76	5' UTR (NM_001347503, exon 1 of 8)	5' UTR (NM_001347503, exon 1 of 8)	148	NM_001347503	Mm.27621	NM_027045	ENSMUSG00000058690	Ccser2	1700012P13Rik|2900054P12Rik|AI035535|AW108503|Fam190b|Gcap14	coiled-coil serine rich 2	protein-coding	Gcap14	10418991	0.34014	0.0374712	12	0	0	9.94191	10.0165	10.0452	10.0644	9.98284	10.0459
17260	chr13-705	chr13	83524734	83525004	+	9.48	0.667	5' UTR (NM_001347567, exon 1 of 11)	5' UTR (NM_001347567, exon 1 of 11)	126	NM_001347566	Mm.24001	NM_025282	ENSMUSG00000005583	Mef2c	5430401D19Rik|9930028G15Rik|AV011172|Mef2	myocyte enhancer factor 2C	protein-coding	Mef2c	10406434	1	0.410551	12	0	0.0558614	11.5152	11.4362	11.517	11.5341	11.5126	11.4539
11480	chr2-874	chr2	48814123	48814393	+	13.1	0.647	5' UTR (NM_007396, exon 1 of 11)	5' UTR (NM_007396, exon 1 of 11)	149	NM_007396	Mm.314338	NM_007396	ENSMUSG00000052155	Acvr2a	ActrIIa|Acvr2|TactrII	activin receptor IIA	protein-coding	Acvr2a	10471953	0.555588	0.0902228	24	9	0.0443356	444.522	457.948	465.559	420.648	421.141	456.196
11487	chr9-296	chr9	70678973	70679243	+	15.3	0.651	5' UTR (NM_007399, exon 1 of 16)	5' UTR (NM_007399, exon 1 of 16)	126	NM_007399	Mm.3037	NM_007399	ENSMUSG00000054693	Adam10	1700031C13Rik|MADM|kuz|kuzbanian	a disintegrin and metallopeptidase domain 10	protein-coding	Adam10	10586844	1	0.693388	20	4.33333	0.0558049	245.417	292.905	240.288	268.363	248.741	254.69
11671	chr11-876	chr11	61266890	61267160	+	12.4	0.625	5' UTR (NM_007437, exon 1 of 10)	5' UTR (NM_007437, exon 1 of 10)	161	NM_007437	Mm.398221	NM_007437	ENSMUSG00000010025	Aldh3a2	AI194803|Ahd-3|Ahd-3r|Ahd3|Ahd3-r|Aldh4|Aldh4-r|FALDH	aldehyde dehydrogenase family 3, subfamily A2	protein-coding	Aldh3a2	10386652	0.00673042	9.66e-05	12	1	0.0304339	157.602	168.357	161.431	174.311	165.293	153.764
11796	chr9-379	chr9	7872738	7873008	+	15.3	0.675	5' UTR (NM_007464, exon 1 of 9)	5' UTR (NM_007464, exon 1 of 9)	297	NM_007464	Mm.2026	NM_007464	ENSMUSG00000032000	Birc3	AW107670|Api1|Api2|Birc2|C-IAP2|HIAP2|IAP1|IAP2|MIAP1|MIAP2|MIHB|MIHC|RNF49|cIAP-1|cIAP-2|cIAP1|cIAP2	baculoviral IAP repeat-containing 3	protein-coding	Birc3	10590801	0.00220262	1.94e-05	24	5.5	0.16774	108.656	137.656	109.421	111.549	110.754	93.6658
11946	chr18-73	chr18	77773900	77774170	+	19	0.667	5' UTR (NM_007505, exon 1 of 12)	5' UTR (NM_007505, exon 1 of 12)	267	NM_007505	Mm.276137	NM_007505	ENSMUSG00000025428	Atp5a1	AI035633|AL022851|AL023067|Atpm|D18Ertd206e|Mom2	ATP synthase, H+ transporting, mitochondrial F1 complex, alpha subunit 1	protein-coding	Atp5a1	10456891	0.34014	0.0374712	12	11	0.0772868	12.3196	12.2515	12.3877	12.3337	12.2619	12.2689
12314	chr17-128	chr17	87446694	87446964	+	19.7	0.532	5' UTR (NM_007589, exon 1 of 6)	5' UTR (NM_007589, exon 1 of 6)	106	NM_007589	Mm.329243	NM_007589	ENSMUSG00000036438	Calm2	1500001E21Rik|AL024017	calmodulin 2	protein-coding	Calm2	10453451	1	1	20	12.1667	0	1688	1563.32	1472.96	1546.72	1706	1549.73
12412	chr11-684	chr11	96789176	96789446	+	13.1	0.629	5' UTR (NM_007622, exon 1 of 6)	5' UTR (NM_007622, exon 1 of 6)	175	NM_007622	Mm.29055	NM_007622	ENSMUSG00000018666	Cbx1	Cbx|Cbx-rs2|E430007M08Rik|HP1B|Hp1beta|M31|MOD1	chromobox 1	protein-coding	Cbx1	10380689	0.460888	0.0641441	12	1	0.129309	275.691	253.607	270.211	285.564	285.194	277.726
12447	chr7-781	chr7	38106673	38106943	+	10.9	0.633	5' UTR (NM_007633, exon 2 of 12)	5' UTR (NM_007633, exon 2 of 12)	682	NM_007633	Mm.16110	NM_007633	ENSMUSG00000002068	Ccne1	AW538188|CycE1	cyclin E1	protein-coding	Ccne1	10562563	1	1	20	8.5	0.00608347	69.6128	70.6771	71.4806	64.4041	74.2171	67.3432
12843	chr6-927	chr6	4505628	4505898	+	8.75	0.737	5' UTR (NM_007743, exon 1 of 52)	5' UTR (NM_007743, exon 1 of 52)	145	NM_007743	Mm.277792	NM_007743	ENSMUSG00000029661	Col1a2	AA960264|AI325291|Col1a-2|Cola-2|Cola2|oim	collagen, type I, alpha 2	protein-coding	Col1a2	10536220	1	0.785093	24	11	0.137544	607.277	799.791	848.994	869.203	642.588	611.708
13340	chr19-168	chr19	5023981	5024251	+	17.5	0.6	5' UTR (NM_007854, exon 1 of 12)	5' UTR (NM_007854, exon 1 of 12)	110	NM_007854	Mm.4930	NM_007854	ENSMUSG00000024891	Slc29a2	Der12|Ent2|Hnp36	solute carrier family 29 (nucleoside transporters), member 2	protein-coding	Slc29a2	10460498	0.418067	0.0538095	12	8	0.0635548	147.894	130.188	150.612	143.235	131.02	142.093
14081	chr8-56	chr8	46471068	46471338	+	26.2	0.71	5' UTR (NM_007981, exon 1 of 21)	5' UTR (NM_007981, exon 1 of 21)	166	NM_007981	Mm.210323	NM_007981	ENSMUSG00000018796	Acsl1	Acas|Acas1|Acs|FACS|Facl2|LACS 1|LACS1	acyl-CoA synthetase long-chain family member 1	protein-coding	Acsl1	10571657	0.786454	0.171619	24	13.5	0.108824	1950.46	2070.12	2322.72	2495.48	2233.98	2087.7
14360	chr10-400	chr10	39370015	39370285	+	16	0.587	5' UTR (NM_008054, exon 1 of 14)	5' UTR (NM_008054, exon 1 of 14)	351	NM_001122892	Mm.4848	NM_008054	ENSMUSG00000019843	Fyn	AI448320|AW552119	Fyn proto-oncogene	protein-coding	Fyn	10362596	0.0610847	0.00244254	24	5	0.174443	6.86723	7.45689	7.19851	7.12475	6.90664	6.86903
14675	chr19-174	chr19	16435907	16436177	+	18.2	0.596	5' UTR (NM_008137, exon 1 of 7)	5' UTR (NM_008137, exon 1 of 7)	375	NM_008137	Mm.313181	NM_008137	ENSMUSG00000024697	Gna14	AU023208	guanine nucleotide binding protein, alpha 14	protein-coding	Gna14	10461856	0.460888	0.0641441	24	0	0.171169	67.6398	56.9155	53.4478	51.8931	59.2996	63.9224
15354	chrX-165	chrX	71556014	71556284	+	8.75	0.684	5' UTR (NM_008253, exon 1 of 5)	5' UTR (NM_008253, exon 1 of 5)	232	NM_001293625	Mm.336087	NM_008253	ENSMUSG00000015217	Hmgb3	Hmg2a|Hmg4	high mobility group box 3	protein-coding	Hmgb3	10600017	0.34014	0.0374712	24	16	0.0605849	6.84707	7.04484	7.01177	7.04685	7.10532	7.1625
15354	chrX-165	chrX	71556014	71556284	+	8.75	0.684	5' UTR (NM_008253, exon 1 of 5)	5' UTR (NM_008253, exon 1 of 5)	232	NM_001293625	Mm.336087	NM_008253	ENSMUSG00000015217	Hmgb3	Hmg2a|Hmg4	high mobility group box 3	protein-coding	Hmgb3	10352954	1	0.357622	24	15.5	0.00995606	6.41576	6.69035	6.66163	6.66854	6.67571	6.77103
16329	chr1-531	chr1	52817448	52817718	+	12.4	0.759	5' UTR (NM_008384, exon 1 of 6)	5' UTR (NM_008384, exon 1 of 6)	105	NM_008384	Mm.917	NM_008384	ENSMUSG00000026102	Inpp1	2300002C06Rik|AV137389	inositol polyphosphate-1-phosphatase	protein-coding	Inpp1	10354521	1	0.469977	24	10	0.110775	72.6238	81.6788	76.662	77.2814	75.9933	70.8306
16410	chr2-931	chr2	83724387	83724657	+	11.7	0.615	5' UTR (NM_008402, exon 1 of 30)	5' UTR (NM_008402, exon 1 of 30)	125	NM_008402	Mm.227	NM_008402	ENSMUSG00000027087	Itgav	1110004F14Rik|2610028E01Rik|CD51|D430040G12Rik	integrin alpha V	protein-coding	Itgav	10473281	0.922182	0.232281	12	0.5	0.0395556	462.786	482.799	473.73	560.71	467.801	460.105
16573	chr18-189	chr18	6241054	6241324	+	13.9	0.533	5' UTR (NM_008448, exon 1 of 26)	5' UTR (NM_008448, exon 1 of 26)	335	NM_008448	Mm.223744	NM_008448	ENSMUSG00000006740	Kif5b	AL022807|Khc|Khcs|Kns1|Ukhc	kinesin family member 5B	protein-coding	Kif5b	10457273	1	0.693388	20	6.66667	0.0586899	1153.1	1148.95	1179.86	1213.96	1094.46	1128.82
16909	chr2-1387	chr2	103970263	103970533	+	10.2	0.615	5' UTR (NM_008505, exon 1 of 3)	5' UTR (NM_008505, exon 1 of 3)	111	NM_008505	Mm.29266	NM_008505	ENSMUSG00000032698	Lmo2	Rbtn-2|Rbtn2|Rhom-2|Ttg2	LIM domain only 2	protein-coding	Lmo2	10474201	0.460888	0.0641441	24	5.5	0.141139	198.076	256.777	200.15	209.162	186.395	199.097
17222	chr2-470	chr2	128687111	128687381	+	16.8	0.643	5' UTR (NM_008569, exon 1 of 48)	5' UTR (NM_008569, exon 1 of 48)	149	NM_008569	Mm.277408	NM_008569	ENSMUSG00000014355	Anapc1	2610021O03Rik|AI047775|AI853536|AW547281|Apc1|Mcpr|tsg24	anaphase promoting complex subunit 1	protein-coding	Anapc1	10487513	0.377948	0.044983	24	13	0.0438194	526.54	532.863	557.049	571.579	560.651	553.32
17756	chr1-1138	chr1	66175336	66175606	+	9.48	0.667	5' UTR (NM_008632, exon 1 of 14)	5' UTR (NM_008632, exon 1 of 14)	142	NM_001039934	Mm.256966	NM_008632	ENSMUSG00000015222	Map2	G1-397-34|MAP-2|Mtap-2|Mtap2|repro4	microtubule-associated protein 2	protein-coding	Mtap2	10347036	1	1	20	10.5	0.00790938	7.05049	7.36618	7.29359	7.52385	7.0403	7.16312
18102	chr11-12	chr11	93968193	93968463	+	45.2	0.787	5' UTR (NM_008704, exon 1 of 5)	5' UTR (NM_008704, exon 1 of 5)	193	NM_008704	Mm.439702	NM_008704	ENSMUSG00000037601	Nme1	AL024257|NDPK-A|NM23-M1|NM23A	NME/NM23 nucleoside diphosphate kinase 1	protein-coding	Nme1	10389865	1	0.998554	12	0	0.105748	143.596	124.987	138.443	145.044	123.245	119.125
18475	chr9-543	chr9	45984610	45984880	+	13.9	0.595	5' UTR (NM_008775, exon 1 of 6)	5' UTR (NM_008775, exon 1 of 6)	126	NM_008775	Mm.200859	NM_008775	ENSMUSG00000003131	Pafah1b2	AI747451|AU021353|Pafahb|mus[b]	platelet-activating factor acetylhydrolase, isoform 1b, subunit 2	protein-coding	Pafah1b2	10593159	1	1	20	7.5	0.0499987	203.903	253.438	261.176	257.815	240.09	228.296
18655	chrX-123	chrX	106187084	106187354	+	10.2	0.64	5' UTR (NM_008828, exon 1 of 11)	5' UTR (NM_008828, exon 1 of 11)	119	NM_008828	Mm.316355	NM_008828	ENSMUSG00000062070	Pgk1	Pgk-1	phosphoglycerate kinase 1	protein-coding	Pgk1	10399379	1	1	20	7.16667	0.00997806	5396.47	4845.74	4691.72	5141.59	5044.17	4661.25
18738	chr11-146	chr11	75588096	75588366	+	24.1	0.629	5' UTR (NM_008850, exon 1 of 12)	5' UTR (NM_008850, exon 1 of 12)	152	NM_008850	Mm.3128	NM_008850	ENSMUSG00000017781	Pitpna	Pitpn|vb|vibrator	phosphatidylinositol transfer protein, alpha	protein-coding	Pitpna	10378668	1	1	20	10.5	0.00399123	3730.1	3514.49	3356.64	3483.45	3572.95	3653.34
18759	chr3-222	chr3	30995743	30996013	+	14.6	0.643	5' UTR (NM_008857, exon 1 of 18)	5' UTR (NM_008857, exon 1 of 18)	107	NM_008857	Mm.291554	NM_008857	ENSMUSG00000037643	Prkci	2310021H13Rik|AI427505|PKClambda|Pkci|Pkcl|Prkcl|aPKClambda|mKIAA4165	protein kinase C, iota	protein-coding	Prkci	10491279	1	0.289814	24	6	0.0198697	222.83	262.134	243.568	236.433	244.866	241.879
19012	chr13-245	chr13	112800895	112801165	+	15.3	0.5	5' UTR (NM_008903, exon 1 of 6)	5' UTR (NM_008903, exon 1 of 6)	253	NM_008903	Mm.291029	NM_008247	ENSMUSG00000021759	Plpp1	Hic53|Hpic53|LPP-1|LPP1|PAP-2a|PAP2-alpha|PAP2a|Ppap2a|mPAP	phospholipid phosphatase 1	protein-coding	Ppap2a	10407211	1	0.785093	12	0	0.123588	9.48682	9.42669	9.77164	9.77507	9.52816	9.53383
19164	chr12-325	chr12	83688538	83688808	+	13.1	0.5	5' UTR (NM_008943, exon 1 of 12)	5' UTR (NM_008943, exon 1 of 12)	110	NM_008943	Mm.998	NM_008943	ENSMUSG00000019969	Psen1	Ad3h|PS-1|PS1|S182	presenilin 1	protein-coding	Psen1	10397094	1	0.469977	24	8.5	0.0375191	392.307	423.081	477.276	416.303	400.498	412.56
19300	chr12-210	chr12	84617191	84617461	+	16	0.778	5' UTR (NM_008992, exon 1 of 19)	5' UTR (NM_008992, exon 1 of 19)	140	NM_008992	Mm.229109	NM_008992	ENSMUSG00000021240	Abcd4	P69r|P70R|Pxmp1l	ATP-binding cassette, sub-family D (ALD), member 4	protein-coding	Abcd4	10401488	1	0.410551	12	8	0.00407293	96.4627	99.6612	100.06	91.8635	100.933	108.194
19696	chr11-80	chr11	23770642	23770912	+	27	0.623	5' UTR (NM_009044, exon 1 of 10)	5' UTR (NM_009044, exon 1 of 10)	193	NM_009044	Mm.4869	NM_009044	ENSMUSG00000020275	Rel	c-Rel	reticuloendotheliosis oncogene	protein-coding	Rel	10384725	0.00134283	9.73e-06	24	4	0.269386	317.92	361.768	318.07	264.734	236.737	307.135
20133	chr7-298	chr7	102441846	102442116	+	16	0.619	5' UTR (NM_009103, exon 1 of 19)	5' UTR (NM_009103, exon 1 of 19)	286	NM_009103	Mm.197486	NM_009103	ENSMUSG00000030978	Rrm1	RnrM1	ribonucleotide reductase M1	protein-coding	Rrm1	10555695	0.608446	0.10647	12	0	0.0765231	443.07	415.942	442.493	444.097	421.927	415.706
20391	chr11-45	chr11	94973326	94973596	+	33.5	0.727	5' UTR (NM_009161, exon 2 of 11)	5' UTR (NM_009161, exon 2 of 11)	2866	NM_009161	Mm.18709	NM_009161	ENSMUSG00000001508	Sgca	50DAG|Asg	sarcoglycan, alpha (dystrophin-associated glycoprotein)	protein-coding	Sgca	10390090	0.34014	0.0374712	12	9	0.0555079	2792.42	2679.78	3011.15	2723.79	2635.94	2973.82
20460	chr4-1577	chr4	115000191	115000461	+	7.29	0.571	5' UTR (NM_009185, exon 1 of 17)	5' UTR (NM_009185, exon 1 of 17)	208	NM_001304555	Mm.3988	NM_009185	ENSMUSG00000028718	Stil	Sil	Scl/Tal1 interrupting locus	protein-coding	Stil	10507112	0.418067	0.0538095	12	8	0.114078	4.62399	4.58473	4.78532	4.71418	4.86468	4.94684
20775	chr15-210	chr15	59315080	59315350	+	19	0.667	5' UTR (NM_009270, exon 1 of 11)	5' UTR (NM_009270, exon 1 of 11)	123	NM_009270	Mm.296169	NM_009270	ENSMUSG00000022351	Sqle	AI323792	squalene epoxidase	protein-coding	Sqle	10424349	0.66424	0.125235	24	8	0.203088	54.081	65.8956	69.2825	59.2404	56.3288	53.9361
21969	chr2-257	chr2	160645883	160646153	+	19	0.642	5' UTR (NM_009408, exon 1 of 21)	5' UTR (NM_009408, exon 1 of 21)	121	NM_009408	Mm.217233	NM_009408	ENSMUSG00000070544	Top1	AI467334|D130064I21Rik|Top-1	topoisomerase (DNA) I	protein-coding	Top1	10478196	0.786454	0.171619	12	2	0.135588	389.846	394.264	336.679	395.474	345.296	386.448
22193	chr2-993	chr2	78869024	78869294	+	11.7	0.708	5' UTR (NM_009454, exon 1 of 6)	5' UTR (NM_009454, exon 1 of 6)	112	NM_009454	Mm.1485	NM_009454	ENSMUSG00000027011	Ube2e3	Ubce4|ubcM2	ubiquitin-conjugating enzyme E2E 3	protein-coding	Ube2e3	10473118	1	1	20	9.16667	0.00913346	258.156	246.047	255.334	253.108	258.69	261.243
22218	chr1-285	chr1	59670558	59670828	+	16	0.63	5' UTR (NM_009460, exon 1 of 5)	5' UTR (NM_009460, exon 1 of 5)	141	NM_009460	Mm.362118	NM_009460	ENSMUSG00000026021	Sumo1	GMP1|PIC1|SENTRIN|SMT3|SMT3H3|SMTP3|SUMO-1|Smt3C|Ubl1	small ubiquitin-like modifier 1	protein-coding	Sumo1	10355017	0.922182	0.232281	12	2	0.117196	482.157	446.365	429.829	450.131	432.384	466.612
22240	chr18-455	chr18	43392901	43393171	+	10.2	0.538	5' UTR (NM_009468, exon 1 of 14)	5' UTR (NM_009468, exon 1 of 14)	341	NM_009468	Mm.8180	NM_009468	ENSMUSG00000024501	Dpysl3	CRMP-4|DRP-3|TUC4|ULIP-1|Ulip|Ulip1	dihydropyrimidinase-like 3	protein-coding	Dpysl3	10458663	0.786454	0.171619	24	8.5	0.182045	115.672	138.031	141.192	146.203	120.417	111.635
22289	chrX-61	chrX	18162640	18162910	+	11.7	0.594	5' UTR (NM_009483, exon 1 of 29)	5' UTR (NM_009483, exon 1 of 29)	200	NM_009483	Mm.257498	NM_009483	ENSMUSG00000037369	Kdm6a	Utx	lysine (K)-specific demethylase 6A	protein-coding	Kdm6a	10598798	0.377948	0.044983	12	1	0.119027	235.3	259.376	263.577	300.725	279.493	254.874
22644	chr6-238	chr6	71493943	71494213	+	17.5	0.596	5' UTR (NM_009543, exon 1 of 4)	5' UTR (NM_009543, exon 1 of 4)	201	NM_001308303	Mm.422969	NM_009543	ENSMUSG00000052656	Rnf103	AW146237|AW212918|Zfp103|kf-1	ring finger protein 103	protein-coding	Rnf103	10539002	1	0.785093	24	13	0.0218425	7.98554	7.94913	7.91925	8.06042	7.97458	8.05141
22775	chr7-1597	chr7	10495018	10495288	+	8.02	0.667	5' UTR (NM_009577, exon 1 of 4)	5' UTR (NM_009577, exon 1 of 4)	228	NM_009577	Mm.49441	NM_009577	ENSMUSG00000030393	Zik1	-	zinc finger protein interacting with K protein 1	protein-coding	Zik1	10559964	1	1	20	10.8333	0.0181758	38.3962	39.5356	38.1077	40.0189	43.773	41.6109
11980	chr5-275	chr5	67847172	67847442	+	16	0.614	5' UTR (NM_009727, exon 1 of 36)	5' UTR (NM_009727, exon 1 of 36)	124	NM_001284345	Mm.153230	NM_009727	ENSMUSG00000037685	Atp8a1	AI481521|AI853962|APLT|AW743152|AW822227|Atp3a2|B230107D19Rik|ClassI	ATPase, aminophospholipid transporter (APLT), class I, type 8A, member 1	protein-coding	Atp8a1	10530319	1	1	20	8.5	0.0206161	10.4792	10.4533	10.4273	10.3407	10.5017	10.5302
12038	chr3-952	chr3	73708143	73708413	+	8.02	0.706	5' UTR (NM_009738, exon 1 of 4)	5' UTR (NM_009738, exon 1 of 4)	137	NM_009738	Mm.250719	NM_009738	ENSMUSG00000027792	Bche	C730038G20Rik	butyrylcholinesterase	protein-coding	Bche	10498710	0.66424	0.125235	24	7.5	0.243782	77.1177	119.634	78.4331	105.288	97.3831	79.012
12370	chr1-949	chr1	58795501	58795771	+	10.2	0.75	5' UTR (NM_009812, exon 1 of 9)	5' UTR (NM_009812, exon 1 of 9)	262	NM_009812	Mm.336851	NM_009812	ENSMUSG00000026029	Casp8	CASP-8|FLICE|MACH|Mch5	caspase 8	protein-coding	Casp8	10346564	0.0124456	0.00023376	24	6	0.245309	180.737	329.666	235.952	240.977	195.314	159.855
12457	chr3-108	chr3	51224570	51224840	+	17.5	0.625	5' UTR (NM_009834, exon 1 of 3)	5' UTR (NM_009834, exon 1 of 3)	258	NM_009834	Mm.86541	NM_009834	ENSMUSG00000023087	Noct	AU043840|Ccr4|Ccrn4l	nocturnin	protein-coding	Ccrn4l	10491915	0.0712878	0.00309146	24	20	0.238479	8.00595	7.61214	7.79542	7.83063	7.85195	8.17303
12505	chr2-637	chr2	102901350	102901620	+	13.1	0.667	5' UTR (NM_009851, exon 1 of 19)	5' UTR (NM_009851, exon 1 of 19)	180	NM_001177787	Mm.423621	NM_009851	ENSMUSG00000005087	Cd44	AU023126|AW121933|AW146109|HERMES|Ly-24|Pgp-1	CD44 antigen	protein-coding	Cd44	10485405	0.994691	0.269008	24	5	0.116729	6.36996	6.7484	6.51143	6.42007	6.5098	6.33296
13110	chr4-1439	chr4	96553349	96553619	+	7.29	0.737	5' UTR (NM_010008, exon 1 of 9)	5' UTR (NM_010008, exon 1 of 9)	167	NM_010008	Mm.98200	NM_010008	ENSMUSG00000052914	Cyp2j6	-	cytochrome P450, family 2, subfamily j, polypeptide 6	protein-coding	Cyp2j6	10514510	1	0.886572	12	11	0.0488611	54.65	59.8629	69.8515	68.8927	52.2167	61.3227
13602	chr5-708	chr5	104113837	104114107	+	12.4	0.769	5' UTR (NM_010097, exon 1 of 11)	5' UTR (NM_010097, exon 1 of 11)	116	NM_010097	Mm.29027	NM_010097	ENSMUSG00000029309	Sparcl1	Ecm2|Sc1|hevin|mast9	SPARC-like 1	protein-coding	Sparcl1	10531931	1	0.998554	24	12	0.058902	1898.18	2063.82	2186.49	2215.63	2000.44	1957.37
14043	chr2-530	chr2	93822280	93822550	+	15.3	0.595	5' UTR (NM_010163, exon 1 of 14)	5' UTR (NM_010163, exon 1 of 14)	153	NM_010163	Mm.4336	NM_010163	ENSMUSG00000027198	Ext2	AI893565	exostoses (multiple) 2	protein-coding	Ext2	10485225	0.0521571	0.00192078	12	11	0.10398	358.51	323.769	337.707	347.664	323.473	345.444
14137	chr14-62	chr14	63177822	63178092	+	21.1	0.649	5' UTR (NM_010191, exon 3 of 10)	5' UTR (NM_010191, exon 3 of 10)	1621	NM_010191	Mm.474432	NM_010191	ENSMUSG00000021273	Fdft1	SQS|SS	farnesyl diphosphate farnesyl transferase 1	protein-coding	Fdft1	10412909	1	0.469977	12	1	0.0272236	1498.29	1415.5	1459.74	1489.28	1512.9	1497.56
15251	chr12-160	chr12	73907899	73908169	+	16	0.673	5' UTR (NM_010431, exon 1 of 15)	5' UTR (NM_010431, exon 1 of 15)	167	NM_001313919	Mm.3879	NM_010431	ENSMUSG00000021109	Hif1a	AA959795|HIF-1-alpha|HIF1-alpha|HIF1alpha|MOP1|bHLHe78	hypoxia inducible factor 1, alpha subunit	protein-coding	Hif1a	10396421	0.377948	0.044983	24	12	0.153499	8.8992	9.16456	9.16876	9.2544	9.10576	8.96168
16438	chr6-307	chr6	108213101	108213371	+	14.6	0.639	5' UTR (NM_010585, exon 1 of 62)	5' UTR (NM_010585, exon 1 of 62)	140	NM_010585	Mm.227912	NM_010585	ENSMUSG00000030102	Itpr1	D6Pas2|ENSMUSG00000072853|Gm10429|IP3R 1|IP3R1|InsP3R|Ip3r|Itpr-1|P400|Pcp-1|Pcp1|insP3R1|opt|wblo	inositol 1,4,5-trisphosphate receptor 1	protein-coding	Itpr1	10540408	0.00172794	1.38e-05	24	6.5	0.197955	184.833	209.73	205.004	197.359	166.192	161.998
16865	chr1-553	chr1	131153208	131153478	+	13.1	0.84	5' UTR (NM_010709, exon 1 of 15)	5' UTR (NM_010709, exon 1 of 15)	136	NM_001136070	Mm.276294	NM_010709	ENSMUSG00000026427	Eif2d	D1Ertd5e|Lgtn	eukaryotic translation initiation factor 2D	protein-coding	Eif2d	10349610	1	1	20	9.5	0.0141453	8.07261	7.99253	8.0561	8.07049	8.08246	8.12033
17246	chr10-72	chr10	117710434	117710704	+	22.6	0.551	5' UTR (NM_010786, exon 1 of 12)	5' UTR (NM_010786, exon 1 of 12)	189	NM_010786	Mm.22670	NM_010786	ENSMUSG00000020184	Mdm2	1700007J15Rik|AA415488|Mdm-2	transformed mouse 3T3 cell double minute 2	protein-coding	Mdm2	10372668	1	1	20	8.16667	0.0412369	557.601	550.466	496.903	599.843	567.537	538.036
17692	chrX-76	chrX	168673621	168673891	+	10.9	0.517	5' UTR (NM_010832, exon 1 of 12)	5' UTR (NM_010832, exon 1 of 12)	146	NM_010832	Mm.24248	NM_010832	ENSMUSG00000031358	Msl3	AU018931|Msl31|Msl3l1	male-specific lethal 3 homolog (Drosophila)	protein-coding	Msl3	10607910	0.994691	0.269008	12	1	0.0623173	9.44518	9.40611	9.45933	9.5668	9.51645	9.50404
18746	chr9-58	chr9	59656468	59656738	+	31.3	0.652	5' UTR (NM_011099, exon 1 of 11)	5' UTR (NM_011099, exon 1 of 11)	235	NM_011099	Mm.326167	NM_011099	ENSMUSG00000032294	Pkm	AA414905|AL024370|AL024424|Pk-2|Pk-3|Pk3|Pkm2	pyruvate kinase, muscle	protein-coding	Pkm	10585932	1	1	20	6.83333	0.0012178	5185.26	5273.7	5236.91	5131.27	5024.62	4965.42
19106	chr17-733	chr17	78882298	78882568	+	10.2	0.696	5' UTR (NM_011163, exon 1 of 16)	5' UTR (NM_011163, exon 1 of 16)	139	NM_011163	Mm.378990	NM_011163	ENSMUSG00000024079	Eif2ak2	2310047A08Rik|4732414G15Rik|AI467567|AI747578|Pkr|Prkr|Tik	eukaryotic translation initiation factor 2-alpha kinase 2	protein-coding	Eif2ak2	10452980	0.555588	0.0902228	12	2	0.0549563	46.5462	63.2253	48.4498	63.6015	51.6326	43.5509
19192	chr11-447	chr11	101316244	101316514	+	16.8	0.729	5' UTR (NM_011192, exon 1 of 11)	5' UTR (NM_011192, exon 1 of 11)	128	NM_011192	Mm.288477	NM_011192	ENSMUSG00000078652	Psme3	AA410043|AU020960|Ki|PA28gamma|REGgamma|pa28g	proteaseome (prosome, macropain) activator subunit 3 (PA28 gamma, Ki)	protein-coding	Psme3	10381345	0.555588	0.0902228	12	11	0.0562998	788.901	809.81	855.759	828.926	813.213	825.755
19387	chr15-139	chr15	81729671	81729941	+	17.5	0.652	5' UTR (NM_011241, exon 1 of 17)	5' UTR (NM_011241, exon 1 of 17)	113	NM_001146174	Mm.270975	NM_011241	ENSMUSG00000022391	Rangap1	C79654|Fug1|mKIAA1835	RAN GTPase activating protein 1	protein-coding	Rangap1	10430748	1	1	20	7.5	0.0104471	7.44331	7.30119	7.35173	7.42765	7.32465	7.47087
20660	chr9-446	chr9	42123995	42124265	+	15.3	0.667	5' UTR (NM_011436, exon 1 of 48)	5' UTR (NM_011436, exon 1 of 48)	159	NM_011436	Mm.121920	NM_011436	ENSMUSG00000049313	Sorl1	2900010L19Rik|AI596264|AW261561|LR11|SorLA|gp250|mSorLA	sortilin-related receptor, LDLR class A repeats-containing	protein-coding	Sorl1	10592535	0.167635	0.011578	24	6.5	0.0671645	448.701	474.798	527.092	503.068	438.411	442.839
353187	chr14-38	chr14	18238695	18238965	+	27	0.632	5' UTR (NM_011584, exon 1 of 8)	5' UTR (NM_011584, exon 1 of 8)	276	NM_011584	Mm.26587	NM_011584	ENSMUSG00000021775	Nr1d2	RVR|Rev-erb	nuclear receptor subfamily 1, group D, member 2	protein-coding	Nr1d2	10417734	0.000358582	1.49e-06	24	15.5	0.244235	1096.58	881.007	1069.34	1313.41	1331.28	1206.07
21976	chr16-382	chr16	16870726	16870996	+	13.9	0.676	5' UTR (NM_011624, exon 1 of 18)	5' UTR (NM_011624, exon 1 of 18)	125	NM_011624	Mm.326089	NM_011624	ENSMUSG00000022779	Top3b	-	topoisomerase (DNA) III beta	protein-coding	Top3b	10433910	0.373391	0.0412271	12	1	0.00644174	233.824	238.694	267.21	248.431	238.949	232.011
21982	chr5-100	chr5	76183890	76184160	+	21.9	0.667	5' UTR (NM_011626, exon 1 of 6)	5' UTR (NM_011626, exon 1 of 6)	145	NM_011626	Mm.790	NM_011626	ENSMUSG00000029234	Tmem165	AV026557|Tpardl|Tparl|pFT27	transmembrane protein 165	protein-coding	Tmem165	10522596	0.608446	0.10647	12	0	0.0158745	418.113	407.442	433.017	458.259	387.892	395.858
22592	chr1-365	chr1	44147836	44148106	+	16.8	0.587	5' UTR (NM_011729, exon 1 of 15)	5' UTR (NM_011729, exon 1 of 15)	227	NM_011729	Mm.2213	NM_011729	ENSMUSG00000026048	Ercc5	Xpg	excision repair cross-complementing rodent repair deficiency, complementation group 5	protein-coding	Ercc5	10345981	0.271867	0.0257197	24	18	0.11907	234.121	210.384	217.168	272.071	251.076	249.259
22629	chr5-234	chr5	33018830	33019100	+	18.2	0.732	5' UTR (NM_011738, exon 1 of 2)	5' UTR (NM_011738, exon 1 of 2)	149	NM_011738	Mm.332314	NM_011738	ENSMUSG00000018965	Ywhah	-	tyrosine 3-monooxygenase/tryptophan 5-monooxygenase activation protein, eta polypeptide	protein-coding	Ywhah	10494662	1	1	20	7.83333	0.00561679	929.345	1013.2	1078.49	990.862	861.926	1038.01
23892	chr2-1647	chr2	113758361	113758631	+	8.02	0.652	5' UTR (NM_011824, exon 1 of 2)	5' UTR (NM_011824, exon 1 of 2)	152	NM_011824	Mm.166318	NM_011824	ENSMUSG00000074934	Grem1	Cktsf1b1|Drm|Grem|ld	gremlin 1, DAN family BMP antagonist	protein-coding	Grem1	10485948	0.723213	0.146835	12	6	0.116984	43.4059	48.6801	42.5106	38.0277	42.0712	44.7936
24117	chr10-829	chr10	121033970	121034240	+	8.75	0.708	5' UTR (NM_011915, exon 1 of 10)	5' UTR (NM_011915, exon 1 of 10)	101	NM_011915	Mm.32831	NM_011915	ENSMUSG00000020218	Wif1	AW107799|WIF-1	Wnt inhibitory factor 1	protein-coding	Wif1	10366653	1	0.998554	24	12	0.119572	52.1148	51.8877	58.5197	60.4558	54.8622	48.7392
26416	chr17-69	chr17	28691316	28691586	+	24.8	0.513	5' UTR (NM_011951, exon 1 of 12)	5' UTR (NM_011951, exon 1 of 12)	109	NM_001168508	Mm.311337	NM_011951	ENSMUSG00000053436	Mapk14	CSBP2|Crk1|Csbp1|Mxi2|PRKM14|PRKM15|p38|p38-alpha|p38MAPK|p38a|p38alpha	mitogen-activated protein kinase 14	protein-coding	Mapk14	10443391	1	0.785093	24	5	0	10.3695	10.3334	10.3136	10.347	10.2918	10.378
26556	chr13-293	chr13	93304357	93304627	+	15.3	0.694	5' UTR (NM_011982, exon 1 of 5)	5' UTR (NM_011982, exon 1 of 5)	735	NM_001284189	Mm.37533	NM_011982	ENSMUSG00000007617	Homer1	PSD-Zip45|SYN47|Ves-1|homer-1|vesl-1	homer scaffolding protein 1	protein-coding	Homer1	10406626	1	1	20	5.83333	0.0104895	9.7986	9.76307	9.72639	9.81682	9.76847	9.84536
26569	chr2-285	chr2	29802757	29803027	+	18.2	0.694	5' UTR (NM_011989, exon 1 of 13)	5' UTR (NM_011989, exon 1 of 13)	212	NM_011989	Mm.330113	NM_011989	ENSMUSG00000059316	Slc27a4	BB144259|FATP4	solute carrier family 27 (fatty acid transporter), member 4	protein-coding	Slc27a4	10470751	1	1	20	5.5	0.0128018	130.226	133.471	130.21	131.725	126.621	126.856
26889	chr8-103	chr8	14888696	14888966	+	24.1	0.609	5' UTR (NM_012000, exon 1 of 3)	5' UTR (NM_012000, exon 1 of 3)	295	NM_012000	Mm.254027	NM_012000	ENSMUSG00000026317	Cln8	mnd	ceroid-lipofuscinosis, neuronal 8	protein-coding	Cln8	10570472	1	1	20	6.5	0.0172361	125.22	128.929	127.074	137.453	129.235	122.782
11835	chrX-110	chrX	98148761	98149031	+	8.75	0.625	5' UTR (NM_013476, exon 1 of 8)	5' UTR (NM_013476, exon 1 of 8)	139	NM_013476	Mm.39005	NM_013476	ENSMUSG00000046532	Ar	AW320017|Tfm	androgen receptor	protein-coding	Ar	10600901	1	1	20	10.8333	0.0346011	1275.55	1268.49	1168.3	1288.07	1287.27	1309.5
17311	chr10-595	chr10	100015819	100016089	+	13.1	0.581	5' UTR (NM_013598, exon 1 of 10)	5' UTR (NM_013598, exon 1 of 10)	133	NM_013598	Mm.45124	NM_013598	ENSMUSG00000019966	Kitl	Clo|Con|Gb|Kitlg|Mgf|SCF|SF|SLF|Sl|blz|contrasted	kit ligand	protein-coding	Kitl	10366052	0.304521	0.0311014	12	0.5	0.0951978	249.596	228.188	247.078	255.015	229.223	233.704
17938	chr10-27	chr10	128035394	128035664	+	29.9	0.597	5' UTR (NM_013608, exon 1 of 8)	5' UTR (NM_013608, exon 1 of 8)	183	NM_001113199	Mm.3746	NM_013608	ENSMUSG00000061315	Naca	AL022831|AL024382|Gm1878|mKIAA0363|skNAC	nascent polypeptide-associated complex alpha polypeptide	protein-coding	Naca	10367091	1	1	20	8.5	0.0334933	11.0641	11.0694	11.1687	11.0373	10.9489	11.0811
17938	chr10-27	chr10	128035394	128035664	+	29.9	0.597	5' UTR (NM_013608, exon 1 of 8)	5' UTR (NM_013608, exon 1 of 8)	183	NM_001113199	Mm.3746	NM_013608	ENSMUSG00000061315	Naca	AL022831|AL024382|Gm1878|mKIAA0363|skNAC	nascent polypeptide-associated complex alpha polypeptide	protein-coding	Naca	10401958	1	1	20	7.16667	0.0219596	10.963	10.9711	11.0094	10.9398	10.8154	10.9519
18763	chr17-29	chr17	24550032	24550302	+	35.7	0.651	5' UTR (NM_013630, exon 1 of 46)	5' UTR (NM_013630, exon 1 of 46)	217	NM_013630	Mm.30435	NM_013630	ENSMUSG00000032855	Pkd1	PC1|mFLJ00285	polycystic kidney disease 1 homolog	protein-coding	Pkd1	10442495	1	0.410551	24	19	0.0171756	254.697	242.796	250.678	256.784	235.55	262.607
18950	chr14-123	chr14	50944403	50944673	+	18.2	0.667	5' UTR (NM_013632, exon 1 of 6)	5' UTR (NM_013632, exon 1 of 6)	235	NM_013632	Mm.17932	NM_013632	ENSMUSG00000021871	Pnp	AL024301|AU015798|Np|Np-1|Np-2|Pnp1	purine-nucleoside phosphorylase	protein-coding	Pnp	10414514	1	0.536501	24	3	0.0502117	70.2979	81.4623	61.7634	66.7035	67.0846	60.0978
20656	chr17-124	chr17	13007849	13008119	+	19	0.532	5' UTR (NM_013671, exon 1 of 5)	5' UTR (NM_013671, exon 1 of 5)	145	NM_013671	Mm.290876	NM_013671	ENSMUSG00000006818	Sod2	MnSOD|Sod-2	superoxide dismutase 2, mitochondrial	protein-coding	Sod2	10441815	1	0.835833	18	5.5	0.00434871	3594.31	3435.49	3777.46	3808.75	3598.05	3398.78
27215	chr9-168	chr9	118040577	118040847	+	19	0.559	5' UTR (NM_013727, exon 1 of 8)	5' UTR (NM_013727, exon 1 of 8)	190	NM_001286508	Mm.92705	NM_013727	ENSMUSG00000039285	Azi2	AA410145|AZ2	5-azacytidine induced gene 2	protein-coding	Azi2	10589982	1	1	20	9.16667	0.0400026	8.28169	8.168	8.12918	8.26871	8.31191	8.31887
22365	chr3-777	chr3	96057907	96058177	+	9.48	0.565	5' UTR (NM_013841, exon 1 of 15)	5' UTR (NM_013841, exon 1 of 15)	413	NM_013841	Mm.263185	NM_013841	ENSMUSG00000015747	Vps45	AI462172|AW554165|mVps45	vacuolar protein sorting 45	protein-coding	Vps45	10500304	1	1	20	9.5	0.0464357	63.4945	67.241	64.3974	71.5798	67.079	73.5891
26563	chr4-886	chr4	100095809	100096079	+	12.4	0.607	5' UTR (NM_013845, exon 1 of 9)	5' UTR (NM_013845, exon 1 of 9)	153	NM_013845	Mm.57252	NM_013845	ENSMUSG00000035305	Ror1	2810404D04Rik|Ntrkr1	receptor tyrosine kinase-like orphan receptor 1	protein-coding	Ror1	10506201	1	1	20	13.8333	0.0252036	121.964	138.691	145.973	132.266	136.726	132.944
29820	chr14-505	chr14	61046337	61046607	+	10.2	0.643	5' UTR (NM_013869, exon 1 of 10)	5' UTR (NM_013869, exon 1 of 10)	383	NM_013869	Mm.281356	NM_013869	ENSMUSG00000060548	Tnfrsf19	AL023044|AW123854|TAJ|TAJ-ALPHA|TRADE|Troy	tumor necrosis factor receptor superfamily, member 19	protein-coding	Tnfrsf19	10420596	0.0442516	0.00150322	24	9	0.22235	149.842	154.459	198.663	156.832	152.757	134.249
30878	chrX-133	chrX	48034543	48034813	+	10.2	0.789	5' UTR (NM_013912, exon 1 of 3)	5' UTR (NM_013912, exon 1 of 3)	175	NM_013912	Mm.29262	NM_013912	ENSMUSG00000037010	Apln	6030430G11Rik|Apel	apelin	protein-coding	Apln	10604375	0.146865	0.00939007	12	7	0.0855458	97.8581	85.9348	93.4518	85.8127	89.2438	90.1659
50768	chr8-174	chr8	36613598	36613868	+	21.1	0.647	5' UTR (NM_015802, exon 1 of 14)	5' UTR (NM_015802, exon 1 of 14)	210	NM_015802	Mm.125155	NM_015802	ENSMUSG00000031523	Dlc1	A730069N07Rik|Arhgap7|HP|STARD12|dlc-1	deleted in liver cancer 1	protein-coding	Dlc1	10578222	0.377948	0.044983	24	7	0.200444	152.609	210.743	186.496	202.866	161.484	158.711
19338	chr3-22	chr3	51483958	51484228	+	29.9	0.565	5' UTR (NM_016858, exon 1 of 2)	5' UTR (NM_016858, exon 1 of 2)	127	NM_016858	Mm.1664	NM_016858	ENSMUSG00000027739	Rab33b	-	RAB33B, member RAS oncogene family	protein-coding	Rab33b	10491945	1	0.886572	12	1	0	142.476	152.49	146.863	151.476	147.44	136.238
50875	chr9-383	chr9	75559381	75559651	+	14.6	0.605	5' UTR (NM_016963, exon 1 of 10)	5' UTR (NM_016963, exon 1 of 10)	141	NM_016963	Mm.38445	NM_016963	ENSMUSG00000058587	Tmod3	U-Tmod|UTMOD	tropomodulin 3	protein-coding	Tmod3	10595000	0.377948	0.044983	12	2	0.0685469	150.292	189.658	176.586	205.867	171.144	140.161
54198	chr10-136	chr10	42502071	42502341	+	18.2	0.61	5' UTR (NM_017472, exon 1 of 4)	5' UTR (NM_017472, exon 1 of 4)	152	NM_017472	Mm.277870	NM_017472	ENSMUSG00000019804	Snx3	SDP3	sorting nexin 3	protein-coding	Snx3	10362823	1	1	20	9.83333	0	1181.17	1176.27	1167.41	1299.01	1160.15	1186.5
102247	chr8-802	chr8	23191475	23191745	+	11.7	0.773	5' UTR (NM_018743, exon 2 of 13)	5' UTR (NM_018743, exon 2 of 13)	16843	NM_018743	Mm.200898	NM_018743	ENSMUSG00000031545	Gpat4	AU041707|AW545732|Agpat6|Tsarg7	glycerol-3-phosphate acyltransferase 4	protein-coding	Agpat6	10577604	0.555588	0.0902228	12	1	0.0384666	8.01516	8.10125	7.93855	8.07384	7.99247	7.99116
54381	chr15-880	chr15	33083178	33083448	+	8.75	0.714	5' UTR (NM_018755, exon 1 of 9)	5' UTR (NM_018755, exon 1 of 9)	184	NM_176073	Mm.158251	NM_018755	ENSMUSG00000039007	Cpq	1190003P12Rik|2610034C17Rik|Hls2|Lal-1|Pgcp	carboxypeptidase Q	protein-coding	Pgcp	10423556	1	1	20	5.83333	0	8.70569	8.91365	8.79268	8.82981	8.86545	8.69278
54380	chr1-436	chr1	72583283	72583553	+	16.8	0.543	5' UTR (NM_018817, exon 1 of 17)	5' UTR (NM_018817, exon 1 of 17)	167	NM_018817	Mm.274232	NM_018817	ENSMUSG00000039354	Smarcal1	6030401P21Rik|AI851716|Mharp	SWI/SNF related matrix associated, actin dependent regulator of chromatin, subfamily a-like 1	protein-coding	Smarcal1	10347254	1	1	20	9.16667	0.00602062	262.283	262.403	280.596	270.987	232.723	292.913
14773	chr19-106	chr19	60889798	60890068	+	17.5	0.595	5' UTR (NM_018869, exon 1 of 16)	5' UTR (NM_018869, exon 1 of 16)	184	NM_018869	Mm.279400	NM_018869	ENSMUSG00000003228	Grk5	Gprk5	G protein-coupled receptor kinase 5	protein-coding	Grk5	10464425	0.00673042	9.66e-05	24	6.5	0.25062	103.829	125.087	110.098	119.065	83.7699	87.4969
22628	chr5-43	chr5	135934393	135934663	+	28.4	0.562	5' UTR (NM_018871, exon 1 of 2)	5' UTR (NM_018871, exon 1 of 2)	113	NM_018871	Mm.233813	NM_018871	ENSMUSG00000051391	Ywhag	14-3-3gamma|D7Bwg1348e	tyrosine 3-monooxygenase/tryptophan 5-monooxygenase activation protein, gamma polypeptide	protein-coding	Ywhag	10534531	1	0.835833	24	4	0.0361332	1512.27	1526.7	1425.84	1440.35	1399.99	1528.08
55991	chr9-637	chr9	15044906	15045176	+	13.1	0.6	5' UTR (NM_019482, exon 1 of 5)	5' UTR (NM_019482, exon 1 of 5)	437	NM_019482	Mm.142253	NM_019482	ENSMUSG00000031934	Panx1	AI847747	pannexin 1	protein-coding	Panx1	10590983	1	0.334121	24	6	0.12315	102.114	110.968	125.514	117.627	102.222	104.287
56195	chr3-366	chr3	119783086	119783356	+	13.1	0.6	5' UTR (NM_019550, exon 1 of 14)	5' UTR (NM_019550, exon 1 of 14)	167	NM_019550	Mm.29966	NM_019550	ENSMUSG00000028134	Ptbp2	Ptb2|brPTB|nPTB	polypyrimidine tract binding protein 2	protein-coding	Ptbp2	10501778	0.34014	0.0374712	24	15	0.108732	614.39	658.601	724.303	737.316	783.685	746.382
56349	chr13-565	chr13	3917961	3918231	+	10.2	0.63	5' UTR (NM_019671, exon 1 of 12)	5' UTR (NM_019671, exon 1 of 12)	124	NM_019671	Mm.22261	NM_019671	ENSMUSG00000021215	Net1	Net1a|mNET1	neuroepithelial cell transforming gene 1	protein-coding	Net1	10407420	1	1	20	11.8333	0.015499	313.393	319.588	308.747	341.995	326.915	325.813
56505	chr6-533	chr6	88465382	88465652	+	10.9	0.676	5' UTR (NM_019685, exon 1 of 11)	5' UTR (NM_019685, exon 1 of 11)	108	NM_019685	Mm.42195	NM_019685	ENSMUSG00000030079	Ruvbl1	2510009G06Rik|Pontin52|Tip49a	RuvB-like protein 1	protein-coding	Ruvbl1	10539882	1	0.410551	12	10.5	0.0587111	193.911	197.491	209.19	199.005	193.004	223.847
56314	chr5-177	chr5	138155495	138155765	+	19.7	0.667	5' UTR (NM_019747, exon 1 of 5)	5' UTR (NM_019747, exon 1 of 5)	114	NM_019747	Mm.19274	NM_019747	ENSMUSG00000037007	Zfp113	4732456B05Rik|mKIAA4229	zinc finger protein 113	protein-coding	Zfp113	10534966	0.922182	0.232281	24	15.5	0.055225	122.911	123.89	115.171	146.93	130.878	129.157
56431	chr2-554	chr2	143915459	143915729	+	13.9	0.615	5' UTR (NM_019771, exon 1 of 4)	5' UTR (NM_019771, exon 1 of 4)	263	NM_019771	Mm.28919	NM_019771	ENSMUSG00000015932	Dstn	2610043P17Rik|ADF|AU042046|Dsn|corn1|sid23p	destrin	protein-coding	Dstn	10476648	1	0.410551	12	3	0.0755826	342.222	414.728	366.592	417.494	332.636	342.495
56363	chr1-1584	chr1	50927581	50927851	+	8.02	0.538	5' UTR (NM_019790, exon 1 of 10)	5' UTR (NM_019790, exon 1 of 10)	193	NM_019790	Mm.245154	NM_019790	ENSMUSG00000026109	Tmeff2	4832418D20Rik|7630402F16Rik|TR-2	transmembrane protein with EGF-like and two follistatin-like domains 2	protein-coding	Tmeff2	10346150	0.190788	0.0142182	24	5	0.0865852	124.225	137.793	120.82	138.81	126.644	107.46
268977	chr17-349	chr17	75005624	75005894	+	15.3	0.512	5' UTR (NM_019919, exon 1 of 34)	5' UTR (NM_019919, exon 1 of 34)	230	NM_019919	Mm.269747	NM_019919	ENSMUSG00000001870	Ltbp1	9430031G15Rik|9830146M04|Ltbp-1|Ltbp1L|TGF-beta1-BP-1|Tgfb|b2b1000Clo	latent transforming growth factor beta binding protein 1	protein-coding	Ltbp1	10446928	0.0833197	0.00389482	24	12	0.0456225	168.223	192.952	201.607	199.282	195.948	199.995
56697	chr11-544	chr11	61930017	61930287	+	15.3	0.587	5' UTR (NM_019921, exon 1 of 15)	5' UTR (NM_019921, exon 1 of 15)	105	NM_019921	Mm.274404	NM_019921	ENSMUSG00000047804	Akap10	1500031L16Rik|B130049N18Rik|D-AKAP-2|D-AKAP2|PRKA10	A kinase (PRKA) anchor protein 10	protein-coding	Akap10	10386824	0.460888	0.0641441	12	2	0	188.283	215.688	220.657	221.864	197.685	196.439
56693	chr9-839	chr9	114390468	114390738	+	10.9	0.516	5' UTR (NM_019922, exon 1 of 7)	5' UTR (NM_019922, exon 1 of 7)	109	NM_019922	Mm.20904	NM_019922	ENSMUSG00000032431	Crtap	5730529N23Rik|CASP|Leprel3|P3h5	cartilage associated protein	protein-coding	Crtap	10597413	1	1	20	9.83333	0.030536	123.703	145.914	143.13	142.789	121.103	122.916
16439	chr6-128	chr6	146501888	146502158	+	21.1	0.627	5' UTR (NM_019923, exon 1 of 57)	5' UTR (NM_019923, exon 1 of 57)	200	NM_019923	Mm.7800	NM_010586	ENSMUSG00000030287	Itpr2	AI649341|InsP3R-2|InsP3R-5|Ip3r2|Itpr5|insP3R2	inositol 1,4,5-triphosphate receptor 2	protein-coding	Itpr2	10549282	0.994691	0.269008	24	3.5	0.0418395	7.73552	7.87761	7.66052	7.85058	7.69985	7.79812
56784	chr12-154	chr12	55820863	55821133	+	16.8	0.784	5' UTR (NM_019994, exon 1 of 41)	5' UTR (NM_019994, exon 1 of 41)	518	NM_019994	Mm.292180	NM_019994	ENSMUSG00000021027	Ralgapa1	2310003F20Rik|4930400K19Rik|AI563624|GRIPE|Garnl1|Tulip1|mKIAA0884	Ral GTPase activating protein, alpha subunit 1	protein-coding	Ralgapa1	10400413	0.786454	0.171619	24	7	0.0247558	669.198	645.525	642.254	685.636	630.031	614.16
56749	chr8-243	chr8	109608423	109608693	+	19.7	0.6	5' UTR (NM_020046, exon 1 of 9)	5' UTR (NM_020046, exon 1 of 9)	115	NM_020046	Mm.23894	NM_020046	ENSMUSG00000031730	Dhodh	2810417D19Rik|AI834883	dihydroorotate dehydrogenase	protein-coding	Dhodh	10581612	1	1	20	8.5	0.00454748	116.036	103.371	120.531	122.837	116.815	120.835
56878	chr2-432	chr2	60962770	60963040	+	15.3	0.577	5' UTR (NM_020296, exon 1 of 14)	5' UTR (NM_020296, exon 1 of 14)	299	NM_020296	Mm.259667	NM_020296	ENSMUSG00000026970	Rbms1	2600014B10Rik|AI255215|MSSP-1|MSSP-2|MSSP-3|YC1	RNA binding motif, single stranded interacting protein 1	protein-coding	Rbms1	10483023	1	0.31062	24	8	0.157819	202.291	232.372	252.512	236.137	212.951	210.606
57257	chr3-374	chr3	109340875	109341145	+	12.4	0.793	5' UTR (NM_020505, exon 1 of 27)	5' UTR (NM_020505, exon 1 of 27)	327	NM_020505	Mm.282257	NM_020505	ENSMUSG00000033721	Vav3	A530094I06Rik|AA986410|Idd18.1	vav 3 oncogene	protein-coding	Vav3	10495416	1	0.693388	24	6	0.0613839	61.009	69.3383	69.0084	65.8728	69.473	72.0242
80517	chr9-250	chr9	25151272	25151542	+	16.8	0.583	5' UTR (NM_020586, exon 1 of 8)	5' UTR (NM_020586, exon 1 of 8)	374	NM_020586	Mm.142843	NM_020586	ENSMUSG00000008429	Herpud2	5031400M07Rik|AB041580	HERPUD family member 2	protein-coding	Herpud2	10591869	0.922182	0.232281	24	10.5	0.00721249	1139.43	1160.8	1190.04	1144.5	1116.53	1072.53
57376	chr11-1872	chr11	99230576	99230846	+	10.2	0.667	5' UTR (NM_020618, exon 1 of 11)	5' UTR (NM_020618, exon 1 of 11)	306	NM_020618	Mm.379086	NM_020618	ENSMUSG00000037935	Smarce1	2810417B20Rik|5830412H02Rik|9030408N19Rik|Baf27	SWI/SNF related, matrix associated, actin dependent regulator of chromatin, subfamily e, member 1	protein-coding	Smarce1	10390768	1	1	20	12.1667	0.0190212	620.669	647.802	678.756	668.619	624.349	665.424
68981	chr7-592	chr7	66060411	66060681	+	12.4	0.579	5' UTR (NM_021336, exon 1 of 9)	5' UTR (NM_021336, exon 1 of 9)	210	NM_021336	Mm.22362	NM_021336	ENSMUSG00000030512	Snrpa1	1500015N06Rik	small nuclear ribonucleoprotein polypeptide A'	protein-coding	Snrpa1	10553993	1	0.31062	12	0	0.0639507	168.94	176.234	192.69	202.049	171.244	167.433
58810	chr4-523	chr4	116651256	116651526	+	13.1	0.553	5' UTR (NM_021473, exon 1 of 9)	5' UTR (NM_021473, exon 1 of 9)	283	NM_021473	Mm.30085	NM_021473	ENSMUSG00000028692	Akr1a1	2610201A18Rik|Akr1a4	aldo-keto reductase family 1, member A1 (aldehyde reductase)	protein-coding	Akr1a1	10515352	1	1	20	14.5	0.0109759	1570.71	1580.76	1576.71	1480.63	1491.66	1513.42
13626	chr7-137	chr7	89980618	89980888	+	19.7	0.508	5' UTR (NM_021876, exon 1 of 12)	5' UTR (NM_021876, exon 1 of 12)	223	NM_021876	Mm.380914	NM_021876	ENSMUSG00000030619	Eed	ENSMUSG00000039373|l(7)5Rn|l7Rn5|lusk	embryonic ectoderm development	protein-coding	Eed	10565486	1	0.998554	18	4	0.00913582	235.707	256.025	244.907	282.123	236.204	251.48
59095	chr9-908	chr9	45370274	45370544	+	10.9	0.81	5' UTR (NM_022004, exon 1 of 8)	5' UTR (NM_022004, exon 1 of 8)	224	NM_022004	Mm.208287	NM_022004	ENSMUSG00000066705	Fxyd6	0610030I18Rik|Php	FXYD domain-containing ion transport regulator 6	protein-coding	Fxyd6	10584883	0.505682	0.0762022	24	14	0.285318	532.649	465.956	729.928	701.145	597.403	589.215
63985	chr14-119	chr14	46821994	46822264	+	16.8	0.659	5' UTR (NM_022023, exon 1 of 7)	5' UTR (NM_022023, exon 1 of 7)	113	NM_022023	Mm.87312	NM_022023	ENSMUSG00000062014	Gmfb	3110001H22Rik|3110001O16Rik|AI851627|C79176|D14Ertd630e	glia maturation factor, beta	protein-coding	Gmfb	10419274	0.723213	0.146835	12	2	0	402.845	449.76	450.402	458.246	440.895	423.909
64009	chr10-892	chr10	5068778	5069048	+	10.2	0.6	5' UTR (NM_022027, exon 1 of 17)	5' UTR (NM_022027, exon 1 of 17)	150	NM_022027	Mm.331626	NM_022027	ENSMUSG00000096054	Syne1	8B|A330049M09Rik|BE692247|C130039F11Rik|CPG2|Myne1|mKIAA1756|myne-1	spectrin repeat containing, nuclear envelope 1	protein-coding	Syne1	10361381	1	0.410551	12	0	0.058506	234.22	237.539	236.784	252.679	240.245	251.057
109145	chr8-1071	chr8	23237382	23237652	+	10.9	0.618	5' UTR (NM_024240, exon 1 of 8)	5' UTR (NM_024240, exon 1 of 8)	151	NM_024240	Mm.27945	NM_024240	ENSMUSG00000031546	Gins4	2810037C03Rik|4933405K01Rik|Sld5	GINS complex subunit 4 (Sld5 homolog)	protein-coding	Gins4	10577623	0.460888	0.0641441	12	2	0.0472772	253.363	265.381	247.225	269.026	285.471	251.205
71819	chr9-559	chr9	61946492	61946762	+	13.9	0.579	5' UTR (NM_024245, exon 1 of 23)	5' UTR (NM_024245, exon 1 of 23)	172	NM_024245	Mm.259374	NM_024245	ENSMUSG00000032254	Kif23	3110001D19Rik|C87313|CHO1|Knsl5|MKLP-1|MKLP1	kinesin family member 23	protein-coding	Kif23	10594251	1	0.610752	12	6	0.0305329	27.8051	31.8244	27.2533	25.9901	27.8485	31.013
78825	chr1-310	chr1	178187533	178187803	+	16	0.531	5' UTR (NM_024282, exon 1 of 5)	5' UTR (NM_024282, exon 1 of 5)	251	NM_024282	Mm.440132	NM_024282	ENSMUSG00000026502	Desi2	5830417C01Rik|DeSI-2|Fam152a|Pppde1	desumoylating isopeptidase 2	protein-coding	Pppde1	10352119	1	0.536501	18	2	0.0411077	9.42489	9.2918	9.31326	9.3778	9.20925	9.46358
66109	chr12-716	chr12	36042201	36042471	+	8.02	0.714	5' UTR (NM_025359, exon 1 of 6)	5' UTR (NM_025359, exon 1 of 6)	142	NM_025359	Mm.254663	NM_025359	ENSMUSG00000020577	Tspan13	1100001I23Rik|NET-6|Tm4sf13	tetraspanin 13	protein-coding	Tspan13	10400023	0.66424	0.125235	12	10	0.105111	838.415	820.972	912	822.465	780.579	810.653
66460	chr2-246	chr2	164460951	164461221	+	18.2	0.571	5' UTR (NM_025575, exon 1 of 4)	5' UTR (NM_025575, exon 1 of 4)	115	NM_025575	Mm.44218	NM_025575	ENSMUSG00000045503	Sys1	2610042O14Rik|AI266964|C87389	SYS1 Golgi-localized integral membrane protein homolog (S. cerevisiae)	protein-coding	Sys1	10478487	1	0.998554	12	0	0.0372928	268.53	248.836	273.806	280.882	256.085	288.971
66832	chr17-249	chr17	7945598	7945868	+	17.5	0.551	5' UTR (NM_025789, exon 1 of 8)	5' UTR (NM_025789, exon 1 of 8)	119	NM_025789	Mm.29830	NM_025789	ENSMUSG00000073471	Rsph3a	1700012G05Rik|4930524H12Rik|R74860|Rshl2|Rshl2a	radial spoke 3A homolog (Chlamydomonas)	protein-coding	Rsph3a	10441610	0.608446	0.10647	12	0	0.129938	510.413	441.779	460.712	512.941	467.528	487.011
66840	chr11-103	chr11	121354182	121354452	+	26.2	0.597	5' UTR (NM_025793, exon 1 of 10)	5' UTR (NM_025793, exon 1 of 10)	130	NM_025793	Mm.103986	NM_025793	ENSMUSG00000025173	Wdr45b	0610008N23Rik|AA408735|D16Bwg0193e|WIPI-3|Wdr45l	WD repeat domain 45B	protein-coding	Wdr45l	10394102	0.146865	0.00939007	12	1	0.0215314	8.0521	8.14268	8.02165	8.25901	8.04423	7.89817
66857	chr6-335	chr6	136661577	136661847	+	17.5	0.703	5' UTR (NM_025806, exon 1 of 11)	5' UTR (NM_025806, exon 1 of 11)	181	NM_025806	Mm.3311	NM_025806	ENSMUSG00000030214	Plbd1	1100001H23Rik	phospholipase B domain containing 1	protein-coding	Plbd1	10548817	1	0.65207	24	12	0.148344	387.083	441.148	479.714	548.227	446.647	431.076
67045	chr17-433	chr17	17374437	17374707	+	13.1	0.694	5' UTR (NM_025934, exon 1 of 10)	5' UTR (NM_025934, exon 1 of 10)	240	NM_025934	Mm.35117	NM_025934	ENSMUSG00000023852	Riok2	2010110K24Rik|2410085M17Rik	RIO kinase 2 (yeast)	protein-coding	Riok2	10442057	0.66424	0.125235	24	16	0.113604	440.83	452.17	473.29	480.686	497.658	531.848
67053	chr14-122	chr14	8080316	8080586	+	17.5	0.617	5' UTR (NM_025938, exon 1 of 6)	5' UTR (NM_025938, exon 1 of 6)	138	NM_025938	Mm.210048	NM_025938	ENSMUSG00000023156	Rpp14	2610511E03Rik|AA682089	ribonuclease P 14 subunit	protein-coding	Rpp14	10412616	0.418067	0.0538095	12	0	0.0808435	266.96	248.936	266.954	294.714	270.424	275.668
13486	chr5-867	chr5	108269047	108269317	+	11.7	0.625	5' UTR (NM_026106, exon 1 of 3)	5' UTR (NM_026106, exon 1 of 3)	285	NM_026106	Mm.303534	NM_026106	ENSMUSG00000029265	Dr1	1700121L09Rik|Dr1l|NC2|NC2beta	down-regulator of transcription 1	protein-coding	Dr1	10523955	1	0.785093	12	1.5	0.00183141	332.44	336.962	343.082	373.701	339.098	342.735
67378	chr8-71	chr8	94098447	94098717	+	24.8	0.594	5' UTR (NM_026116, exon 1 of 17)	5' UTR (NM_026116, exon 1 of 17)	229	NM_026116	Mm.292107	NM_026116	ENSMUSG00000031755	Bbs2	2410125H22Rik|AI447581	Bardet-Biedl syndrome 2 (human)	protein-coding	Bbs2	10580733	1	0.785093	12	0	0.0430557	95.1868	102.019	107.285	110.904	106.805	115.121
73447	chrX-103	chrX	8132193	8132463	+	10.2	0.654	5' UTR (NM_026137, exon 1 of 9)	5' UTR (NM_026137, exon 1 of 9)	530	NM_026137	Mm.284162	NM_026137	ENSMUSG00000031166	Wdr13	1700060B08Rik|5730411P10Rik|DXHXS7467e|W51679|mMg21	WD repeat domain 13	protein-coding	Wdr13	10603453	1	1	20	12.5	0.0182528	139.631	140.646	148.713	154.361	134.457	151.14
67448	chr2-915	chr2	16356621	16356891	+	10.9	0.625	5' UTR (NM_026162, exon 1 of 14)	5' UTR (NM_026162, exon 1 of 14)	452	NM_026162	Mm.313938	NM_026162	ENSMUSG00000026748	Plxdc2	1200007L24Rik|5430431D22Rik|AI646728|AU022916|AV231634|Tem7r	plexin domain containing 2	protein-coding	Plxdc2	10469457	0.34014	0.0374712	12	1	0	439.546	487.663	471.332	561.028	495.981	378.22
67698	chr1-466	chr1	95313619	95313889	+	14.6	0.667	5' UTR (NM_026321, exon 1 of 3)	5' UTR (NM_026321, exon 1 of 3)	126	NM_026321	Mm.272705	NM_026321	ENSMUSG00000051185	Fam174a	2310044D20Rik|Fam174|Naa6|Tmem157	family with sequence similarity 174, member A	protein-coding	Fam174a	10348917	0.994691	0.269008	12	2	0	348.644	350.15	353.788	361.602	366.084	358.376
67774	chr6-547	chr6	134641048	134641318	+	12.4	0.739	5' UTR (NM_026371, exon 1 of 4)	5' UTR (NM_026371, exon 1 of 4)	243	NM_026371	Mm.41892	NM_026371	ENSMUSG00000042992	Borcs5	5830457J20Rik|AW124643|Loh12cr1	BLOC-1 related complex subunit 5	protein-coding	Loh12cr1	10542297	1	0.31062	12	0	0.0926522	7.63638	7.47117	7.51476	7.61131	7.53942	7.61028
226747	chr1-260	chr1	179803428	179803698	+	16.8	0.483	5' UTR (NM_026375, exon 1 of 36)	5' UTR (NM_026375, exon 1 of 36)	452	NM_026375	Mm.128165	NM_026375	ENSMUSG00000026491	Ahctf1	6230412P20Rik|AV011447|Elys	AT hook containing transcription factor 1	protein-coding	Ahctf1	10352192	1	1	20	12.5	0.00906747	35.3126	30.9385	31.3084	30.3787	31.7499	30.7086
67812	chr1-250	chr1	128244162	128244432	+	18.2	0.588	5' UTR (NM_026390, exon 1 of 13)	5' UTR (NM_026390, exon 1 of 13)	116	NM_026390	Mm.293321	NM_026390	ENSMUSG00000026353	Ubxn4	1300013G12Rik|Ubxd2|mKIAA0242	UBX domain protein 4	protein-coding	Ubxn4	10349512	1	1	20	9.83333	0.0349051	604.459	608.537	640.098	660.947	650.777	609.132
67864	chr17-302	chr17	74489527	74489797	+	15.3	0.622	5' UTR (NM_026417, exon 1 of 6)	5' UTR (NM_026417, exon 1 of 6)	169	NM_026417	Mm.41891	NM_026417	ENSMUSG00000024072	Yipf4	2310034L04Rik	Yip1 domain family, member 4	protein-coding	Yipf4	10446823	1	0.357622	12	1.5	0.0547513	190.247	201.923	198.607	215.92	213.8	208.058
67974	chr18-55	chr18	9449698	9449968	+	19	0.524	5' UTR (NM_026484, exon 1 of 10)	5' UTR (NM_026484, exon 1 of 10)	317	NM_026484	Mm.86523	NM_026484	ENSMUSG00000024286	Ccny	1700025H17Rik|3110050L10Rik|4631402G10Rik|5730405I09Rik	cyclin Y	protein-coding	Ccny	10457385	0.34014	0.0374712	12	2	0.0758584	996.931	985.567	884.881	1025.92	983.097	990.642
68010	chr18-260	chr18	3507978	3508248	+	13.1	0.479	5' UTR (NM_026505, exon 1 of 3)	5' UTR (NM_026505, exon 1 of 3)	156	NM_026505	Mm.284863	NM_026505	ENSMUSG00000024232	Bambi	2610003H06Rik	BMP and activin membrane-bound inhibitor	protein-coding	Bambi	10453604	0.994691	0.269008	24	16	0.0129188	99.1444	90.2103	97.2287	95.2343	115.836	123.823
72482	chr1-582	chr1	155558203	155558473	+	13.9	0.556	5' UTR (NM_026683, exon 1 of 4)	5' UTR (NM_026683, exon 1 of 4)	218	NM_028250	Mm.288249	NM_026683	ENSMUSG00000033701	Acbd6	0610010G04Rik|2610100E10Rik	acyl-Coenzyme A binding domain containing 6	protein-coding	Acbd6	10350777	0.922182	0.232281	12	10	0.0548008	7.74198	7.67115	7.74865	7.79019	7.73258	7.72932
52397	chr5-587	chr5	106696545	106696815	+	13.9	0.59	5' UTR (NM_026856, exon 1 of 7)	5' UTR (NM_026856, exon 1 of 7)	150	NM_026856	Mm.249474	NM_026856	ENSMUSG00000049606	Zfp644	1110068L01Rik|AA408882|BM-005|D5Ertd689e|Zep-2	zinc finger protein 644	protein-coding	Zfp644	10532040	0.125072	0.00684202	12	1	0.114141	512.504	532.029	492.568	573.301	488.275	504.395
69276	chr3-63	chr3	30793184	30793454	+	21.1	0.538	5' UTR (NM_027016, exon 1 of 8)	5' UTR (NM_027016, exon 1 of 8)	443	NM_027016	Mm.26017	NM_027016	ENSMUSG00000027706	Sec62	3100002M17Rik|AI844545|AW545092|Dtrp1|HTP1|Tloc1	SEC62 homolog (S. cerevisiae)	protein-coding	Sec62	10491261	1	1	20	7.16667	0.0095208	353.977	335.775	366.399	367.686	359.025	341.369
72972	chr14-49	chr14	36968494	36968764	+	22.6	0.578	5' UTR (NM_027045, exon 1 of 11)	5' UTR (NM_027045, exon 1 of 11)	135	NM_027045	Mm.27621	NM_027045	ENSMUSG00000058690	Ccser2	1700012P13Rik|2900054P12Rik|AI035535|AW108503|Fam190b|Gcap14	coiled-coil serine rich 2	protein-coding	Gcap14	10418991	0.34014	0.0374712	12	0	0	9.94191	10.0165	10.0452	10.0644	9.98284	10.0459
69544	chr16-354	chr16	36041222	36041492	+	13.1	0.588	5' UTR (NM_027113, exon 1 of 1)	5' UTR (NM_027113, exon 1 of 1)	167	NM_027113	Mm.37802	NM_027113	ENSMUSG00000034379	Wdr5b	2310009C03Rik|AI606931	WD repeat domain 5B	protein-coding	Wdr5b	10435487	1	1	20	11.8333	0.0267624	77.7505	75.6674	78.2728	80.445	87.6948	78.3059
69554	chr12-238	chr12	69296736	69297006	+	15.3	0.547	5' UTR (NM_027117, exon 1 of 13)	5' UTR (NM_027117, exon 1 of 13)	190	NM_027117	Mm.234368	NM_027117	ENSMUSG00000020978	Klhdc2	2310022K15Rik|D12Ertd522e|HCLP-1|LCP	kelch domain containing 2	protein-coding	Klhdc2	10396094	0.922182	0.232281	12	2	0.0408708	1201.65	1177	1154.46	1186.59	1151.34	1118.38
69737	chr2-1110	chr2	129065979	129066249	+	10.2	0.586	5' UTR (NM_027192, exon 1 of 7)	5' UTR (NM_027192, exon 1 of 7)	167	NM_027192	Mm.33909	NM_027192	ENSMUSG00000027394	Ttl	2410003M22Rik|2700049H19Rik|AI848570	tubulin tyrosine ligase	protein-coding	Ttl	10475957	0.852649	0.199965	12	0	0.125009	204.821	190.262	227.905	241.968	201.477	198.102
70225	chr1-419	chr1	58445241	58445511	+	16.8	0.609	5' UTR (NM_027351, exon 1 of 7)	5' UTR (NM_027351, exon 1 of 7)	110	NM_001285827	Mm.340195	NM_027351	ENSMUSG00000026035	Ppil3	2310076N22Rik|2510026K04Rik|Cyp10l	peptidylprolyl isomerase (cyclophilin)-like 3	protein-coding	Ppil3	10354832	1	1	20	8.16667	0.0351393	7.58624	7.52524	7.67966	7.67286	7.7451	7.5665
70235	chr9-34	chr9	106281145	106281415	+	105	0.813	5' UTR (NM_027354, exon 1 of 11)	5' UTR (NM_027354, exon 1 of 11)	219	NM_027354	Mm.23054	NM_027354	ENSMUSG00000023345	Poc1a	2510040D07Rik|Wdr51a|cha	POC1 centriolar protein A	protein-coding	Poc1a	10588482	0.922182	0.232281	12	7	0.007064	31.2235	27.4471	31.4405	29.1863	27.2522	30.8633
70238	chr16-246	chr16	32277508	32277778	+	12.4	0.629	5' UTR (NM_027355, exon 1 of 6)	5' UTR (NM_027355, exon 1 of 6)	182	NM_027355	Mm.228263	NM_027355	ENSMUSG00000014074	Rnf168	3110001H15Rik	ring finger protein 168	protein-coding	Rnf168	10435024	1	0.469977	24	16	0.107169	196.914	191.888	197.95	211.249	217.829	217.681
70247	chr1-589	chr1	86064615	86064885	+	14.6	0.538	5' UTR (NM_027357, exon 1 of 25)	5' UTR (NM_027357, exon 1 of 25)	131	NM_027357	Mm.280013	NM_027357	ENSMUSG00000026229	Psmd1	2410026J11Rik|P112|S1	proteasome (prosome, macropain) 26S subunit, non-ATPase, 1	protein-coding	Psmd1	10348004	1	1	20	6.16667	2.36e-05	2422.7	2368.73	2441.07	2379.59	2450.74	2442.6
75782	chr9-1072	chr9	83440844	83441114	+	8.75	0.68	5' UTR (NM_027448, exon 1 of 8)	5' UTR (NM_027448, exon 1 of 8)	120	NM_027448	Mm.199698	NM_027448	ENSMUSG00000032258	Lca5	4930431B11Rik|5730406O13Rik|AV274874|ORF64	Leber congenital amaurosis 5 (human)	protein-coding	Lca5	10595382	1	1	20	8.16667	0.0220232	55.8502	51.5621	54.7418	50.6542	50.709	49.5681
70717	chr5-360	chr5	149411784	149412054	+	16	0.676	5' UTR (NM_027519, exon 1 of 5)	5' UTR (NM_027519, exon 1 of 5)	113	NM_027519	Mm.252139	NM_027519	ENSMUSG00000029659	Medag	6330406I15Rik|Awms3|MEDA-4|Meda4|mAWMS3	mesenteric estrogen dependent adipogenesis	protein-coding	6330406I15Rik	10527649	0.608446	0.10647	24	7	0.0365574	6.71375	6.81222	6.67033	6.85487	6.70497	6.50082
71147	chr14-35	chr14	16249474	16249744	+	27	0.643	5' UTR (NM_027695, exon 1 of 3)	5' UTR (NM_027695, exon 1 of 3)	199	NM_027695	Mm.197960	NM_027695	ENSMUSG00000021786	Oxsm	4933425A18Rik|C80494	3-oxoacyl-ACP synthase, mitochondrial	protein-coding	Oxsm	10417708	0.994691	0.269008	12	1	0.0958625	409.313	392.356	402.362	468.381	420.392	392.182
71544	chr9-556	chr9	9238704	9238974	+	12.4	0.727	5' UTR (NM_027823, exon 1 of 23)	5' UTR (NM_027823, exon 1 of 23)	174	NM_027823	Mm.334955	NM_027823	ENSMUSG00000050730	Arhgap42	9030420J04Rik|BE136619	Rho GTPase activating protein 42	protein-coding	Arhgap42	10590844	1	0.693388	12	0	0	175.303	201.983	213.606	232.881	180.795	184.176
71949	chr15-379	chr15	99772267	99772537	+	15.3	0.622	5' UTR (NM_028015, exon 1 of 10)	5' UTR (NM_028015, exon 1 of 10)	113	NM_028015	Mm.390821	NM_028015	ENSMUSG00000023021	Cers5	2310081H14Rik|AU045339|AW544927|Lass5|Trh4	ceramide synthase 5	protein-coding	Lass5	10432527	1	1	20	8.5	0	7.84487	8.0982	8.06571	8.10144	7.94486	7.91927
71971	chr2-125	chr2	164823002	164823272	+	23.3	0.717	5' UTR (NM_028028, exon 1 of 2)	5' UTR (NM_028028, exon 1 of 2)	451	NM_028028	Mm.161149	NM_028028	ENSMUSG00000017764	Zswim1	2410003H12Rik|AI850991|BB046916	zinc finger SWIM-type containing 1	protein-coding	Zswim1	10478590	1	0.469977	24	5	0	67.2014	59.2302	60.87	60.3939	54.9215	55.137
72397	chr4-924	chr4	12140329	12140599	+	10.2	0.484	5' UTR (NM_028226, exon 1 of 3)	5' UTR (NM_028226, exon 1 of 3)	347	NM_028226	Mm.430709	NM_028226	ENSMUSG00000046667	Rbm12b1	3000004N20Rik|Rbm12b|Rbm12ba	RNA binding motif protein 12 B1	protein-coding	Rbm12b///C430048L16Rik	10503363	1	1	20	7.5	0.00458755	7.35844	7.42493	7.53747	7.522	7.25829	7.42618
72416	chr17-152	chr17	84790497	84790767	+	18.2	0.631	5' UTR (NM_028233, exon 1 of 38)	5' UTR (NM_028233, exon 1 of 38)	154	NM_028233	Mm.217027	NM_028233	ENSMUSG00000024120	Lrpprc	3110001K13Rik|C76645|Gp130|Lrp130|Lsfc	leucine-rich PPR-motif containing	protein-coding	Lrpprc	10453334	0.852649	0.199965	12	1	0.0915562	622.608	623.273	645.329	731.503	666.865	638.278
72759	chr7-170	chr7	89338547	89338817	+	16.8	0.633	5' UTR (NM_028343, exon 1 of 15)	5' UTR (NM_028343, exon 1 of 15)	105	NM_028343	Mm.208477	NM_028343	ENSMUSG00000039428	Tmem135	2810439K08Rik|AW319712|PMP52	transmembrane protein 135	protein-coding	Tmem135	10565437	0.377948	0.044983	24	7.5	0.0930623	187.738	203.282	205.67	219.136	183.03	174.834
72787	chr4-630	chr4	107367777	107368047	+	12.4	0.639	5' UTR (NM_028355, exon 1 of 18)	5' UTR (NM_028355, exon 1 of 18)	128	NM_028355	Mm.28478	NM_028355	ENSMUSG00000028614	Ndc1	2810475A17Rik|AI450313|Tmem48|sks	NDC1 transmembrane nucleoporin	protein-coding	Tmem48	10506680	1	1	20	12.1667	0	7.33751	7.4086	7.3701	7.34639	7.42205	7.44293
72825	chr9-423	chr9	107888100	107888370	+	13.9	0.628	5' UTR (NM_028369, exon 1 of 6)	5' UTR (NM_028369, exon 1 of 6)	106	NM_028369	Mm.38037	NM_028369	ENSMUSG00000032583	Mon1a	2810468K17Rik	MON1 homolog A, secretory traffciking associated	protein-coding	Mon1a	10588722	1	1	20	10.1667	0.0335789	169.039	160.737	161.015	174.312	172.594	166.784
73112	chr10-401	chr10	18022968	18023238	+	13.9	0.6	5' UTR (NM_028440, exon 1 of 3)	5' UTR (NM_028440, exon 1 of 3)	149	NM_028440	Mm.276041	NM_028440	ENSMUSG00000078453	Abracl	1700028I04Rik|3110003A17Rik	ABRA C-terminal like	protein-coding	3110003A17Rik	10368041	0.723213	0.146835	24	6	0.0692894	5.45256	5.87164	5.71586	5.6582	5.69085	5.3936
73112	chr10-401	chr10	18022968	18023238	+	13.9	0.6	5' UTR (NM_028440, exon 1 of 3)	5' UTR (NM_028440, exon 1 of 3)	149	NM_028440	Mm.276041	NM_028440	ENSMUSG00000078453	Abracl	1700028I04Rik|3110003A17Rik	ABRA C-terminal like	protein-coding	3110003A17Rik	10368045	1	0.410551	12	5.5	0.168518	5.49105	5.81399	5.51694	5.34105	5.5378	5.74516
74150	chr1-212	chr1	125561093	125561363	+	18.2	0.569	5' UTR (NM_028787, exon 1 of 16)	5' UTR (NM_028787, exon 1 of 16)	212	NM_028787	Mm.28654	NM_028787	ENSMUSG00000026342	Slc35f5	1300003P13Rik|AI646727	solute carrier family 35, member F5	protein-coding	Slc35f5	10349383	0.922182	0.232281	12	0	0.129613	583.306	570.052	626.539	713.797	624.267	636.894
74185	chr16-66	chr16	70313973	70314243	+	20.4	0.723	5' UTR (NM_028803, exon 1 of 16)	5' UTR (NM_028803, exon 1 of 16)	159	NM_028803	Mm.396102	NM_028803	ENSMUSG00000022707	Gbe1	2310045H19Rik|2810426P10Rik|D16Ertd536e	glucan (1,4-alpha-), branching enzyme 1	protein-coding	Gbe1	10436500	1	0.357622	12	0	0.178912	777.113	668.364	841.069	831.038	798.728	765.48
74204	chr7-937	chr7	126200084	126200354	+	10.9	0.621	5' UTR (NM_028816, exon 1 of 24)	5' UTR (NM_028816, exon 1 of 24)	189	NM_028816	Mm.235663	NM_028816	ENSMUSG00000000131	Xpo6	2610005L19Rik|AL022631|C230091E20Rik|R75304|Ranbp20|mKIAA0370	exportin 6	protein-coding	Xpo6	10567797	1	1	20	8.16667	0.035503	440.006	461.411	536.108	484.412	489.756	428.47
74375	chr6-127	chr6	28421357	28421627	+	19.7	0.63	5' UTR (NM_028900, exon 1 of 2)	5' UTR (NM_028900, exon 1 of 2)	232	NM_028900	Mm.332950	NM_028900	ENSMUSG00000029708	Gcc1	4932417P04Rik	golgi coiled coil 1	protein-coding	Gcc1	10543524	0.922182	0.232281	24	10	0.0402132	73.9265	60.9528	67.8577	65.7236	65.5271	60.8359
74895	chr1-597	chr1	164275615	164275885	+	13.9	0.677	5' UTR (NM_029115, exon 1 of 6)	5' UTR (NM_029115, exon 1 of 6)	152	NM_029115	Mm.167258	NM_029115	ENSMUSG00000026578	Ccdc181	4930455F23Rik|AI427889	coiled-coil domain containing 181	protein-coding	4930455F23Rik	10351269	0.377948	0.044983	12	0	0.203088	7.36053	6.86589	7.14753	7.28622	7.11781	6.97314
19654	chr9-281	chr9	107872573	107872843	+	16.8	0.588	5' UTR (NM_029169, exon 1 of 21)	5' UTR (NM_029169, exon 1 of 21)	111	NM_011251	Mm.139926	NM_011251	ENSMUSG00000032582	Rbm6	4930506F14Rik|Def-3|NY-LU-12|g16|mKIAA4015	RNA binding motif protein 6	protein-coding	Rbm6	10596796	0.922182	0.232281	12	1	0.130299	148.721	160.757	143.774	168.06	146.051	142.948
75547	chr7-394	chr7	75455592	75455862	+	15.3	0.707	5' UTR (NM_029332, exon 1 of 37)	5' UTR (NM_029332, exon 1 of 37)	193	NM_029332	Mm.216107	NM_029332	ENSMUSG00000066406	Akap13	1700026G02Rik|5730522G15Rik|5830460E08Rik|AKAP-13|AKAP-Lbc|BRX|Ht31|LBC|PROTO-LB|PROTO-LBC	A kinase (PRKA) anchor protein 13	protein-coding	Akap13	10554166	0.167635	0.011578	24	11.5	0.195727	261.261	304.247	303.274	341.093	311.766	249.675
75560	chr5-129	chr5	110770403	110770673	+	20.4	0.706	5' UTR (NM_029337, exon 1 of 52)	5' UTR (NM_029337, exon 1 of 52)	179	NM_029337	Mm.270487	NM_029337	ENSMUSG00000029505	Ep400	1700020J09Rik|AU023439|mDomino|mKIAA1498|p400	E1A binding protein p400	protein-coding	Ep400	10532407	0.0521571	0.00192078	24	7	0.115166	188.282	250.589	224.878	221.454	197.754	209.482
75565	chr7-527	chr7	126649331	126649601	+	13.1	0.541	5' UTR (NM_029339, exon 1 of 10)	5' UTR (NM_029339, exon 1 of 10)	157	NM_029339	Mm.45686	NM_029339	ENSMUSG00000030714	Sgf29	1700023O11Rik|9530025I05Rik|Ccdc101	SAGA complex associated factor 29	protein-coding	Ccdc101	10557439	1	0.785093	12	10	0.0186676	8.31278	8.37954	8.31419	8.45145	8.17984	8.37072
72083	chr16-269	chr16	15862834	15863104	+	14.6	0.595	5' UTR (NM_029354, exon 1 of 3)	5' UTR (NM_029354, exon 1 of 3)	353	NM_029354	Mm.22351	NM_029354	ENSMUSG00000022671	Mzt2	2410018G20Rik|2610001E06Rik|Fam128|Fam128b	mitotic spindle organizing protein 2	protein-coding	Mzt2	10437963	1	1	20	11.8333	0.0225316	81.4611	70.9288	85.7349	75.483	75.8943	81.372
109294	chr1-611	chr1	10993615	10993885	+	12.4	0.568	5' UTR (NM_029525, exon 1 of 40)	5' UTR (NM_029525, exon 1 of 40)	285	NM_029525	Mm.123247	NM_029525	ENSMUSG00000048960	Prex2	6230420N16Rik|AI316880|AI553603|C030045D06Rik|D430013K02|Depdc2|P-Rex2	phosphatidylinositol-3,4,5-trisphosphate-dependent Rac exchange factor 2	protein-coding	Prex2	10344837	1	0.536501	12	1	0.074925	238.316	242.004	246.665	260.757	244.048	239.988
76295	chr3-729	chr3	35754118	35754388	+	9.48	0.654	5' UTR (NM_029570, exon 1 of 30)	5' UTR (NM_029570, exon 1 of 30)	115	NM_029570	Mm.239416	NM_029570	ENSMUSG00000037400	Atp11b	1110019I14Rik|ATPIF|ATPIR|mKIAA0956	ATPase, class VI, type 11B	protein-coding	Atp11b	10491486	0.555588	0.0902228	12	1	0.0741684	392.147	418.305	401.927	432.303	405.562	371.392
76485	chr14-107	chr14	31001402	31001672	+	18.2	0.604	5' UTR (NM_029626, exon 1 of 10)	5' UTR (NM_029626, exon 1 of 10)	104	NM_029626	Mm.8766	NM_029626	ENSMUSG00000021916	Glt8d1	2410004H05Rik|5430414N14Rik|AI450005	glycosyltransferase 8 domain containing 1	protein-coding	Glt8d1	10413657	1	0.886572	12	11	0.0695227	192.813	183.478	196.418	201.958	190.346	197.337
76539	chr19-348	chr19	60226327	60226597	+	12.4	0.618	5' UTR (NM_029648, exon 1 of 8)	5' UTR (NM_029648, exon 1 of 8)	235	NM_029648	Mm.290183	NM_029648	ENSMUSG00000057858	Fam204a	2310065H12Rik|2610015K05Rik|D19Ertd737e	family with sequence similarity 204, member A	protein-coding	D19Ertd737e	10468802	0.786454	0.171619	12	1.5	0.103365	8.04241	8.13732	7.92809	8.1745	8.09585	8.16489
76832	chr9-199	chr9	35569772	35570042	+	19	0.564	5' UTR (NM_029762, exon 1 of 4)	5' UTR (NM_029762, exon 1 of 4)	162	NM_029762	Mm.482285	NM_029762	ENSMUSG00000050555	Hyls1	3010015K02Rik	hydrolethalus syndrome 1	protein-coding	Hyls1	10592154	0.0521571	0.00192078	24	5	0.0247417	22.3263	28.9107	24.6992	24.4817	24.1035	23.5113
76877	chr10-768	chr10	75037150	75037420	+	10.2	0.531	5' UTR (NM_029781, exon 1 of 11)	5' UTR (NM_029781, exon 1 of 11)	196	NM_029781	Mm.133593	NM_029781	ENSMUSG00000020175	Rab36	6330593L16Rik|AW047545	RAB36, member RAS oncogene family	protein-coding	Rab36	10363970	1	1	20	7.83333	0.00356303	44.1399	45.1464	43.1468	42.0312	38.1518	40.436
76915	chr3-277	chr3	84155538	84155808	+	15.3	0.676	5' UTR (NM_029797, exon 1 of 8)	5' UTR (NM_029797, exon 1 of 8)	113	NM_029797	Mm.274829	NM_029797	ENSMUSG00000033752	Mnd1	2610034E18Rik|AI591601|Gaj	meiotic nuclear divisions 1	protein-coding	Mnd1	10499035	1	1	20	7.16667	0.0195468	22.423	23.5162	24.0224	24.6129	23.2571	25.194
380686	chr11-1927	chr11	17051973	17052243	+	8.75	0.583	5' UTR (NM_029861, exon 1 of 3)	5' UTR (NM_029861, exon 1 of 3)	174	NM_029861	Mm.425666	NM_029861	ENSMUSG00000044629	Cnrip1	1500041B16Rik|3110054C06Rik|5330437A18Rik|AI854501|C2orf32	cannabinoid receptor interacting protein 1	protein-coding	Cnrip1	10374406	1	0.998554	24	11	0.0363736	70.4706	65.1408	74.7043	71.4009	70.3613	61.1093
74570	chr5-590	chr5	138085095	138085365	+	13.1	0.731	5' UTR (NM_029869, exon 1 of 4)	5' UTR (NM_029869, exon 1 of 4)	146	NM_133906	Mm.213114	NM_029869	ENSMUSG00000029729	Zkscan1	5930429A01Rik|9130423L19Rik|9230118B16Rik|AI646829|AI788588|C87323|KOX18|PHZ-37|ZNF139	zinc finger with KRAB and SCAN domains 1	protein-coding	Zkscan1	10526726	1	0.357622	24	13.5	0	8.46602	8.53829	8.48386	8.61257	8.49856	8.56964
78372	chr11-1054	chr11	32205417	32205687	+	12.4	0.71	5' UTR (NM_030093, exon 1 of 5)	5' UTR (NM_030093, exon 1 of 5)	137	NM_030093	Mm.29952	NM_030093	ENSMUSG00000040767	Snrnp25	3300001G02Rik|AL033324|C16ORF33	small nuclear ribonucleoprotein 25 (U11/U12)	protein-coding	Snrnp25	10375031	1	1	20	13.5	0.0248469	137.635	134.74	156.583	148.365	141.836	148.5
78903	chr13-77	chr13	32801998	32802268	+	20.4	0.731	5' UTR (NM_030215, exon 1 of 7)	5' UTR (NM_030215, exon 1 of 7)	103	NM_030215	Mm.286680	NM_030215	ENSMUSG00000021400	Wrnip1	4833444L21Rik|WHIP|Wrnip	Werner helicase interacting protein 1	protein-coding	Wrnip1	10404412	1	1	20	6.5	0	88.9455	100.429	95.6863	95.5524	96.5798	97.6752
27878	chr1-26	chr1	166379186	166379456	+	37.9	0.629	5' UTR (NM_030245, exon 1 of 8)	5' UTR (NM_030245, exon 1 of 8)	154	NM_030245	Mm.100665	NM_030245	ENSMUSG00000026563	Tada1	2900026B15Rik|D1Ertd251e|Staf42|Tada1l	transcriptional adaptor 1	protein-coding	Tada1	10351390	0.460888	0.0641441	24	4	0.00490732	193.848	223.169	199.897	213.975	200.792	214.962
80718	chr18-608	chr18	70053165	70053435	+	8.75	0.52	5' UTR (NM_030554, exon 1 of 6)	5' UTR (NM_030554, exon 1 of 6)	288	NM_030554	Mm.246753	NM_030554	ENSMUSG00000024511	Rab27b	2310021G14Rik|B130064M09Rik	RAB27B, member RAS oncogene family	protein-coding	Rab27b	10459620	1	0.886572	12	7	0.0776686	47.8673	50.741	47.0545	43.3623	44.7039	50.6103
26422	chr3-819	chr3	56183463	56183733	+	8.75	0.654	5' UTR (NM_030595, exon 1 of 58)	5' UTR (NM_030595, exon 1 of 58)	103	NM_030595	Mm.384353	NM_030595	ENSMUSG00000027799	Nbea	Lyst2|mKIAA1544	neurobeachin	protein-coding	Nbea	10498210	1	1	20	8.5	0.02738	100.526	126.373	116.387	122.275	111.335	113.194
94315	chr3-226	chr3	87885258	87885528	+	16.8	0.625	5' UTR (NM_033573, exon 1 of 7)	5' UTR (NM_033573, exon 1 of 7)	169	NM_033573	Mm.35089	NM_033573	ENSMUSG00000004895	Prcc	-	papillary renal cell carcinoma (translocation-associated)	protein-coding	Prcc	10499265	0.608446	0.10647	12	0	0.00120915	354.298	353.878	361.615	401.29	340.521	340.953
11793	chr10-534	chr10	44268443	44268713	+	12.4	0.606	5' UTR (NM_053069, exon 1 of 8)	5' UTR (NM_053069, exon 1 of 8)	239	NM_053069	Mm.22264	NM_053069	ENSMUSG00000038160	Atg5	2010107M05Rik|3110067M24Rik|AW319544|Apg5l|Atg5l|C88337|Paddy	autophagy related 5	protein-coding	Atg5	10362922	0.994691	0.269008	12	1	0.0764029	133.556	133.051	139.044	136.558	129.018	138.147
94093	chr3-344	chr3	103279377	103279647	+	13.9	0.645	5' UTR (NM_053170, exon 1 of 20)	5' UTR (NM_053170, exon 1 of 20)	219	NM_053170	Mm.195036	NM_053170	ENSMUSG00000033014	Trim33	8030451N04Rik|AI413936|Ecto|Tif1g	tripartite motif-containing 33	protein-coding	Trim33	10494924	1	0.536501	12	1	0.0842871	301.512	312.372	330.132	344.345	294.771	316.945
114142	chr6-502	chr6	14901328	14901598	+	12.4	0.778	5' UTR (NM_053242, exon 1 of 19)	5' UTR (NM_053242, exon 1 of 19)	114	NM_053242	Mm.332919	NM_053242	ENSMUSG00000029563	Foxp2	2810043D05Rik|AI449000|CAG-16|D0Kist7	forkhead box P2	protein-coding	Foxp2	10536444	0.0521571	0.00192078	24	9.5	0.0490308	80.3118	84.5229	86.2056	84.7952	84.1622	82.9304
259302	chr6-434	chr6	112946798	112947068	+	13.9	0.75	5' UTR (NM_080448, exon 1 of 22)	5' UTR (NM_080448, exon 1 of 22)	333	NM_080448	Mm.236401	NM_080448	ENSMUSG00000030257	Srgap3	AI452337|Arhgap14|D130026O08Rik|Gbi|MEGAP|WRP|mKIAA0411	SLIT-ROBO Rho GTPase activating protein 3	protein-coding	Srgap3	10546853	1	0.357622	12	7	0.291943	65.7742	93.3689	83.1895	71.9204	74.3618	70.9052
140546	chr4-185	chr4	117550364	117550634	+	16.8	0.659	5' UTR (NM_080469, exon 1 of 9)	5' UTR (NM_080469, exon 1 of 9)	134	NM_080469	Mm.235891	NM_080469	ENSMUSG00000033423	Eri3	PINT1|Prnpip1	exoribonuclease 3	protein-coding	Eri3	10507484	0.608446	0.10647	12	0	0.0718491	663.862	618.714	639.411	667.221	622.409	598.327
116733	chr8-411	chr8	107031322	107031592	+	14.6	0.605	5' UTR (NM_126165, exon 1 of 11)	5' UTR (NM_126165, exon 1 of 11)	131	NM_126165	Mm.236004	NM_126165	ENSMUSG00000031913	Vps4a	4930589C15Rik|AI325971|AW553189	vacuolar protein sorting 4A	protein-coding	Vps4a	10575129	1	0.357622	12	0	0.049455	1052.35	981.987	1024.43	1000.1	1043.78	1064.38
73173	chr3-487	chr3	49756913	49757183	+	11.7	0.606	5' UTR (NM_130448, exon 1 of 4)	5' UTR (NM_130448, exon 1 of 4)	268	NM_130448	Mm.87246	NM_130448	ENSMUSG00000037892	Pcdh18	3110038E07Rik|BB095589|PCDH68L	protocadherin 18	protein-coding	Pcdh18	10498018	1	0.31062	12	0	0.0857084	137.147	141.498	124.603	148.08	88.834	123.154
170762	chr15-299	chr15	8109281	8109551	+	13.9	0.667	5' UTR (NM_133227, exon 1 of 35)	5' UTR (NM_133227, exon 1 of 35)	103	NM_133227	Mm.295168	NM_133227	ENSMUSG00000022142	Nup155	D930027M19Rik|mKIAA0791	nucleoporin 155	protein-coding	Nup155	10422854	0.460888	0.0641441	12	0	0.0901561	174.793	175.991	182.028	195.019	189.901	186.381
76142	chr10-1084	chr10	3366384	3366654	+	8.02	0.591	5' UTR (NM_133485, exon 1 of 4)	5' UTR (NM_133485, exon 1 of 4)	369	NM_133485	Mm.308126	NM_133485	ENSMUSG00000040653	Ppp1r14c	6330514J04Rik|KEPI	protein phosphatase 1, regulatory (inhibitor) subunit 14c	protein-coding	Ppp1r14c	10367697	1	0.357622	24	9.5	0	528.533	516.921	562.216	509.123	537.977	514.615
20166	chr6-32	chr6	83137572	83137842	+	37.9	0.728	5' UTR (NM_133641, exon 1 of 12)	5' UTR (NM_133641, exon 1 of 12)	623	NM_009106	Mm.4139	NM_009106	ENSMUSG00000034930	Rtkn	-	rhotekin	protein-coding	Rtkn	10539342	0.919488	0.216123	24	11	0.0790333	59.8733	59.5686	63.887	65.7651	59.6818	53.6141
69780	chr4-684	chr4	121017001	121017271	+	13.1	0.647	5' UTR (NM_133716, exon 1 of 10)	5' UTR (NM_133716, exon 1 of 10)	111	NM_133716	Mm.271819	NM_133716	ENSMUSG00000032870	Smap2	1810031K02Rik|AA408614|Smap1l	small ArfGAP 2	protein-coding	Smap2	10515994	0.0833197	0.00389482	24	5	0.0248477	249.069	293.751	275.405	270.242	251.691	256.935
70396	chr1-476	chr1	53352459	53352729	+	13.9	0.71	5' UTR (NM_133728, exon 1 of 6)	5' UTR (NM_133728, exon 1 of 6)	158	NM_133728	Mm.285783	NM_133728	ENSMUSG00000026095	Asnsd1	2210409M21Rik	asparagine synthetase domain containing 1	protein-coding	Asnsd1	10354555	0.852649	0.199965	12	1	0.0275065	2455.84	2418.67	2411.31	2498.59	2467.61	2448.02
20623	chr9-136	chr9	122117254	122117524	+	21.1	0.654	5' UTR (NM_133741, exon 1 of 7)	5' UTR (NM_133741, exon 1 of 7)	123	NM_001164572	Mm.257989	NM_133741	ENSMUSG00000038145	Snrk	2010012F07Rik|AI448042|AW547029|E030034B15|R74830|mKIAA0096	SNF related kinase	protein-coding	Snrk	10590445	0.0521571	0.00192078	24	17	0.176897	9.54585	9.5799	9.50272	9.92573	9.89398	9.75289
98053	chr17-239	chr17	57011009	57011279	+	19	0.674	5' UTR (NM_133801, exon 1 of 13)	5' UTR (NM_133801, exon 1 of 13)	144	NM_133801	Mm.24632	NM_133801	ENSMUSG00000002658	Gtf2f1	2810405L04Rik|C76800|RAP74	general transcription factor IIF, polypeptide 1	protein-coding	Gtf2f1	10452213	0.555588	0.0902228	12	0	0.09273	220.796	204.059	201.611	214.306	191.017	203.734
104479	chr11-697	chr11	5541933	5542203	+	15.3	0.596	5' UTR (NM_134033, exon 1 of 5)	5' UTR (NM_134033, exon 1 of 5)	149	NM_134033	Mm.210403	NM_134033	ENSMUSG00000020482	Ccdc117	1110004K02Rik|1700026O03Rik|AU018638|AU042822|AV173073|BC018601	coiled-coil domain containing 117	protein-coding	Ccdc117	10383993	1	0.785093	12	0	0.107692	292.001	243.786	275.919	259.57	263.225	258.242
246738	chr16-309	chr16	91618674	91618944	+	11.7	0.88	5' UTR (NM_138664, exon 1 of 2)	5' UTR (NM_138664, exon 1 of 2)	190	NM_138664	Mm.101927	NM_138664	ENSMUSG00000039763	Dnajc28	BC020175|ORF28	DnaJ heat shock protein family (Hsp40) member C28	protein-coding	Dnajc28	10440926	1	0.357622	12	1	0.159792	238.86	216.288	232.31	252.721	245.403	225.42
67249	chr5-544	chr5	53809607	53809877	+	13.9	0.618	5' UTR (NM_144517, exon 1 of 21)	5' UTR (NM_144517, exon 1 of 21)	115	NM_144517	Mm.28823	NM_144517	ENSMUSG00000039178	Tbc1d19	2810453K03Rik	TBC1 domain family, member 19	protein-coding	Tbc1d19	10521927	1	1	20	11.1667	0.0539452	879.165	802.195	813.247	857.647	889.185	895.662
74080	chr9-456	chr9	98296655	98296925	+	13.9	0.615	5' UTR (NM_144533, exon 1 of 5)	5' UTR (NM_144533, exon 1 of 5)	207	NM_144533	Mm.294082	NM_144533	ENSMUSG00000032456	Nmnat3	4933408N02Rik|PNAT3	nicotinamide nucleotide adenylyltransferase 3	protein-coding	Nmnat3	10588028	1	1	20	9.83333	0.00479418	137.291	127.486	121.961	143.176	123.112	129.164
217517	chr12-599	chr12	45074139	45074409	+	10.9	0.704	5' UTR (NM_144552, exon 1 of 6)	5' UTR (NM_144552, exon 1 of 6)	209	NM_144552	Mm.285400	NM_144552	ENSMUSG00000046314	Stxbp6	BC024598|C85317	syntaxin binding protein 6 (amisyn)	protein-coding	Stxbp6	10400143	1	1	20	7.83333	0.050269	172.955	216.125	219.266	227.85	223.217	199.298
207304	chr12-98	chr12	51829207	51829477	+	19.7	0.508	5' UTR (NM_144788, exon 1 of 43)	5' UTR (NM_144788, exon 1 of 43)	194	NM_144788	Mm.249391	NM_144788	ENSMUSG00000035247	Hectd1	A630086P08Rik|AI844876|b2b327Clo|opm	HECT domain containing 1	protein-coding	Hectd1	10400210	1	0.31062	12	2	0.0726199	1311.41	1274.04	1221.3	1327.96	1381.96	1258.95
219135	chr14-212	chr14	60265201	60265471	+	15.3	0.641	5' UTR (NM_144843, exon 1 of 14)	5' UTR (NM_144843, exon 1 of 14)	131	NM_144843	Mm.247007	NM_144843	ENSMUSG00000021987	Mtmr6	4022440C11Rik|AI428804|AU041072	myotubularin related protein 6	protein-coding	Mtmr6	10415700	1	0.31062	12	2	0.0202586	566.417	542.651	555.279	589.047	608.208	573.997
224419	chr16-5	chr16	87553340	87553610	+	53.2	0.712	5' UTR (NM_144854, exon 1 of 5)	5' UTR (NM_144854, exon 1 of 5)	145	NM_144854	Mm.194466	NM_144854	ENSMUSG00000025610	Map3k7cl	C21orf7|ORF63|Tak1l	Map3k7 C-terminal like	protein-coding	ORF63	10436727	0.723213	0.146835	24	15	0.0729098	8.94676	8.99573	9.39686	9.14041	9.09884	9.42788
231871	chr5-324	chr5	143464461	143464731	+	15.3	0.675	5' UTR (NM_144915, exon 1 of 15)	5' UTR (NM_144915, exon 1 of 15)	103	NM_144915	Mm.469963	NM_144915	ENSMUSG00000039206	Daglb	E330036I19Rik	diacylglycerol lipase, beta	protein-coding	Daglb	10527213	1	0.31062	24	14.5	0.057813	254.411	252.255	271.7	264.829	272.647	271.361
233833	chr7-419	chr7	123123940	123124210	+	13.9	0.561	5' UTR (NM_144925, exon 1 of 24)	5' UTR (NM_144925, exon 1 of 24)	190	NM_144925	Mm.102305	NM_144925	ENSMUSG00000052707	Tnrc6a	2010321I05Rik|3110054G10Rik|AW557223|CAGH26|D130023A07Rik|GW182|Tnrc6	trinucleotide repeat containing 6a	protein-coding	Tnrc6a	10557233	1	0.31062	24	11	0	313.663	335.207	324.65	344.166	307.463	351.076
211007	chr11-86	chr11	48817084	48817354	+	27	0.635	5' UTR (NM_145377, exon 1 of 6)	5' UTR (NM_145377, exon 1 of 6)	172	NM_145377	Mm.794	NM_145377	ENSMUSG00000040365	Trim41	AW552703|BC020156|R75223|RINCK	tripartite motif-containing 41	protein-coding	Trim41	10385486	0.922182	0.232281	24	14	0.105635	256.819	267.128	285.845	287.664	306.344	284.255
213541	chr4-341	chr4	132211966	132212236	+	14.6	0.718	5' UTR (NM_145393, exon 1 of 5)	5' UTR (NM_145393, exon 1 of 5)	155	NM_145393	Mm.23998	NM_145393	ENSMUSG00000040025	Ythdf2	9430020E02Rik|HGRG8|NY-REN-2	YTH domain family 2	protein-coding	Ythdf2	10516859	0.215927	0.0173912	12	0	0.0513713	295.346	260.051	271.883	297.338	275.642	275.909
234463	chr8-474	chr8	77610417	77610687	+	13.9	0.636	5' UTR (NM_145599, exon 1 of 10)	5' UTR (NM_145599, exon 1 of 10)	101	NM_145599	Mm.273578	NM_145599	ENSMUSG00000031617	Tmem184c	8430433H16Rik|AI645453|AL033298|BC004056|Tmem34	transmembrane protein 184C	protein-coding	Tmem184c	10579799	0.994691	0.269008	12	2	0.116383	609.951	678.469	595.356	676.624	632.569	641.418
235339	chr9-112	chr9	50659480	50659750	+	22.6	0.55	5' UTR (NM_145614, exon 1 of 14)	5' UTR (NM_145614, exon 1 of 14)	165	NM_145614	Mm.285076	NM_145614	ENSMUSG00000000168	Dlat	6332404G05Rik|DLTA|PDC-E2	dihydrolipoamide S-acetyltransferase (E2 component of pyruvate dehydrogenase complex)	protein-coding	Dlat	10593367	1	0.536501	24	9	0.0120208	1339.24	1231.07	1387.43	1417.17	1336.74	1327.5
235439	chr9-327	chr9	66350444	66350714	+	15.3	0.551	5' UTR (NM_145617, exon 1 of 78)	5' UTR (NM_145617, exon 1 of 78)	129	NM_145617	Mm.244179	NM_145617	ENSMUSG00000038664	Herc1	2810449H11Rik|B230218H07|D130015N03Rik|tbl	HECT and RLD domain containing E3 ubiquitin protein ligase family member 1	protein-coding	Herc1	10586505	1	0.469977	12	11	0.040298	627.108	616.937	645.816	628.309	639.163	659.286
252967	chr15-591	chr15	31453412	31453682	+	10.2	0.594	5' UTR (NM_145852, exon 1 of 5)	5' UTR (NM_145852, exon 1 of 5)	142	NM_145852	Mm.436668	NM_145852	ENSMUSG00000022236	Ropn1l	ASP|AV047578|Akapasp	ropporin 1-like	protein-coding	Ropn1l	10428012	1	0.357622	24	0	0.0433386	30.7118	25.8419	25.6716	24.3225	28.6396	26.1163
100532	chr5-327	chr5	63968607	63968877	+	16.8	0.549	5' UTR (NM_145923, exon 1 of 7)	5' UTR (NM_145923, exon 1 of 7)	155	NM_145923	Mm.243632	NM_145923	ENSMUSG00000047881	Rell1	AA536743	RELT-like 1	protein-coding	Rell1	10530130	0.271867	0.0257197	24	21	0.0469307	286.242	278.994	279.207	278.671	255.605	303.567
210973	chr6-459	chr6	56797389	56797659	+	13.9	0.512	5' UTR (NM_145958, exon 1 of 4)	5' UTR (NM_145958, exon 1 of 4)	289	NM_145958	Mm.57295	NM_145958	ENSMUSG00000059486	Kbtbd2	BC022962|Bklhd1|mKIAA1489	kelch repeat and BTB (POZ) domain containing 2	protein-coding	Kbtbd2	10544976	0.66424	0.125235	12	1.5	0.0458028	256.369	284.718	283.723	298.366	296.595	247.599
109168	chr19-125	chr19	7494435	7494705	+	17.5	0.551	5' UTR (NM_146091, exon 1 of 13)	5' UTR (NM_146091, exon 1 of 13)	132	NM_146091	Mm.264016	NM_146091	ENSMUSG00000024759	Atl3	4633402C03Rik|5730596K20Rik|AI465397|AW228836	atlastin GTPase 3	protein-coding	Atl3	10461078	0.786454	0.171619	12	3	0.142595	140.15	214.663	178.523	182.777	179.861	150.936
226351	chr1-123	chr1	119526168	119526438	+	21.1	0.766	5' UTR (NM_146103, exon 1 of 1)	5' UTR (NM_146103, exon 1 of 1)	149	NM_146103	Mm.439806	NM_146103	ENSMUSG00000098923	Tmem185b	2500001K11Rik	transmembrane protein 185B	protein-coding	Tmem185b	10349316	0.460888	0.0641441	24	14	0.18843	112.8	101.714	131.979	120.978	113.57	114.808
16451	chr4-356	chr4	101264927	101265197	+	13.9	0.605	5' UTR (NM_146145, exon 1 of 25)	5' UTR (NM_146145, exon 1 of 25)	220	NM_146145	Mm.289657	NM_146145	ENSMUSG00000028530	Jak1	AA960307|BAP004|C130039L05Rik	Janus kinase 1	protein-coding	Jak1	10514668	1	1	20	7.16667	0.0097895	1745.11	1610.28	1483.2	1544.58	1633.22	1611.18
230753	chr4-138	chr4	126202466	126202736	+	19.7	0.608	5' UTR (NM_146153, exon 1 of 11)	5' UTR (NM_146153, exon 1 of 11)	109	NM_146153	Mm.29813	NM_146153	ENSMUSG00000043962	Thrap3	9330151F09Rik|B230333E16Rik|Trap150	thyroid hormone receptor associated protein 3	protein-coding	Thrap3	10516296	0.505682	0.0762022	12	3	0.0313743	401.813	410.634	398.126	447.7	439.476	407.253
235028	chr9-493	chr9	20492460	20492730	+	13.1	0.613	5' UTR (NM_146221, exon 1 of 7)	5' UTR (NM_146221, exon 1 of 7)	151	NM_146221	Mm.297660	NM_146221	ENSMUSG00000059475	Zfp426	2900057C04Rik|KRAB1|Zfo61|Zfp68-rs1|Znf426|mKIAA4237	zinc finger protein 426	protein-coding	Zfp426	10591241	0.922182	0.232281	24	6.5	0.0457816	101.362	119.771	110.668	110.131	101.982	98.1482
217265	chr11-1040	chr11	110337431	110337701	+	13.1	0.564	5' UTR (NM_147219, exon 1 of 39)	5' UTR (NM_147219, exon 1 of 39)	150	NM_147219	Mm.41942	NM_147219	ENSMUSG00000018800	Abca5	ABC13|B930033A02Rik|mKIAA1888	ATP-binding cassette, sub-family A (ABC1), member 5	protein-coding	Abca5	10392642	0.723213	0.146835	24	15.5	0.0540937	300.473	267.588	326.217	343.982	327.323	328.543
211548	chr7-511	chr7	46033685	46033955	+	13.9	0.733	5' UTR (NM_153057, exon 1 of 31)	5' UTR (NM_153057, exon 1 of 31)	124	NM_153057	Mm.274811	NM_153057	ENSMUSG00000030835	Nomo1	D7Ertd156e|Nomo|pM5	nodal modulator 1	protein-coding	Nomo1	10553163	1	1	20	9.5	0	734.241	736.152	725.544	716.618	713.075	725.218
217378	chr12-116	chr12	4082589	4082859	+	19	0.528	5' UTR (NM_153082, exon 1 of 7)	5' UTR (NM_153082, exon 1 of 7)	150	NM_153082	Mm.271656	NM_153082	ENSMUSG00000020657	Dnajc27	AI639580|C330021A05Rik|Rabj|Rbj	DnaJ heat shock protein family (Hsp40) member C27	protein-coding	Dnajc27	10394245	0.852649	0.199965	24	9	0.0584494	443.134	441.265	462.981	471.512	441.528	424.706
98956	chr2-260	chr2	103760961	103761231	+	17.5	0.553	5' UTR (NM_153126, exon 1 of 29)	5' UTR (NM_153126, exon 1 of 29)	154	NM_153126	Mm.288005	NM_153126	ENSMUSG00000027185	Nat10	AI429152	N-acetyltransferase 10	protein-coding	Nat10	10485483	1	1	20	11.5	0.00500553	233.393	226.653	222.279	222.383	213.618	245.35
215243	chr1-116	chr1	193197903	193198173	+	24.8	0.643	5' UTR (NM_153137, exon 3 of 16)	5' UTR (NM_153137, exon 3 of 16)	3508	NM_153137	Mm.261259	NM_153137	ENSMUSG00000037318	Traf3ip3	6030423D04Rik|AI115021|T3jam	TRAF3 interacting protein 3	protein-coding	Traf3ip3	10361215	0.271867	0.0257197	24	1.5	0.064976	27.2781	35.9311	26.4521	25.8729	26.4958	27.0197
73389	chr12-283	chr12	31950177	31950447	+	16	0.605	5' UTR (NM_153198, exon 1 of 11)	5' UTR (NM_153198, exon 1 of 11)	223	NM_153198	Mm.390461	NM_153198	ENSMUSG00000002996	Hbp1	1700058O05Rik|BE629963|C330012F01Rik|C86454	high mobility group box transcription factor 1	protein-coding	Hbp1	10399897	0.0124456	0.00023376	24	14	0.0644316	821.553	846.373	911.659	890.258	917.306	881.863
207785	chr15-376	chr15	100494993	100495263	+	15.3	0.619	5' UTR (NM_153407, exon 1 of 5)	5' UTR (NM_153407, exon 1 of 5)	111	NM_153407	Mm.294969	NM_153407	ENSMUSG00000044636	Csrnp2	CSRNP-2|Csnrp2|taip-12	cysteine-serine-rich nuclear protein 2	protein-coding	Csrnp2	10432593	1	1	20	8.16667	0.00312855	100.538	99.1073	97.0671	107.722	98.9845	99.3508
233724	chr7-351	chr7	109985958	109986228	+	15.3	0.681	5' UTR (NM_153525, exon 1 of 7)	5' UTR (NM_153525, exon 1 of 7)	137	NM_153525	Mm.43212	NM_153525	ENSMUSG00000047554	Tmem41b	1500015G02Rik|1500031M19Rik|AU018901|D7Ertd70e|D7Ertd743e	transmembrane protein 41B	protein-coding	Tmem41b	10566870	1	1	20	9.5	0.0391839	131.601	128.218	148.344	140.335	143.9	126.456
58909	chr6-176	chr6	59024263	59024533	+	19	0.636	5' UTR (NM_153574, exon 1 of 18)	5' UTR (NM_153574, exon 1 of 18)	104	NM_153574	Mm.28813	NM_153574	ENSMUSG00000037709	Fam13a	AI462012|D430015B01Rik|FAM13A1|Precm1	family with sequence similarity 13, member A	protein-coding	Fam13a	10545045	1	0.357622	24	12	0.229845	144.256	244.517	216.932	242.686	182.46	173.171
244141	chr7-207	chr7	96951652	96951922	+	18.2	0.644	5' UTR (NM_153591, exon 1 of 14)	5' UTR (NM_153591, exon 1 of 14)	260	NM_153591	Mm.274864	NM_153591	ENSMUSG00000018995	Nars2	AI875199	asparaginyl-tRNA synthetase 2 (mitochondrial)(putative)	protein-coding	Nars2	10555011	1	1	20	10.1667	0.0126179	178.588	169.328	176.049	204.006	168.563	202.927
210135	chr7-405	chr7	24081926	24082196	+	14.6	0.636	5' UTR (NM_172483, exon 1 of 3)	5' UTR (NM_172483, exon 1 of 3)	164	NM_001289634	Mm.32254	NM_172483	ENSMUSG00000057101	Zfp180	2310040I01Rik|AI852378|D130011P11|HHZ168	zinc finger protein 180	protein-coding	Zfp180	10550833	1	1	20	5.83333	0.0213185	8.38116	8.2871	8.36009	8.34366	8.24681	8.33733
212919	chr5-388	chr5	130144901	130145171	+	15.3	0.583	5' UTR (NM_172509, exon 1 of 4)	5' UTR (NM_172509, exon 1 of 4)	148	NM_172509	Mm.55812	NM_172509	ENSMUSG00000034110	Kctd7	4932409E18|9430010P06Rik	potassium channel tetramerisation domain containing 7	protein-coding	Kctd7	10526128	0.0373613	0.00117065	12	0	0.060797	44.8361	40.4083	41.019	44.1218	35.2316	35.9408
215748	chr10-202	chr10	7211852	7212122	+	18.2	0.589	5' UTR (NM_172546, exon 1 of 13)	5' UTR (NM_172546, exon 1 of 13)	250	NM_172546	Mm.37984	NM_172546	ENSMUSG00000015202	Cnksr3	6820402C05|BC024086|Magi1	Cnksr family member 3	protein-coding	Cnksr3	10361323	1	1	20	10.1667	0.00791253	79.0887	66.0653	76.0428	73.1867	75.0224	80.8334
218460	chr13-318	chr13	94976348	94976618	+	13.9	0.647	5' UTR (NM_172590, exon 1 of 13)	5' UTR (NM_172590, exon 1 of 13)	139	NM_172590	Mm.33856	NM_172590	ENSMUSG00000042015	Wdr41	B830029I03Rik|MSTP048	WD repeat domain 41	protein-coding	Wdr41	10406718	1	1	20	9.83333	0.0140714	547.073	556.767	567.018	575.184	608.701	592.536
225651	chr18-383	chr18	67245583	67245853	+	10.9	0.6	5' UTR (NM_172630, exon 1 of 11)	5' UTR (NM_172630, exon 1 of 11)	112	NM_172630	Mm.235792	NM_172630	ENSMUSG00000062526	Mppe1	A530095G11	metallophosphoesterase 1	protein-coding	Mppe1	10459518	1	1	20	6.83333	0	77.1118	72.7618	81.5775	75.2897	77.0931	71.7556
103967	chr1-518	chr1	162477752	162478022	+	14.6	0.667	5' UTR (NM_172646, exon 1 of 20)	5' UTR (NM_172646, exon 1 of 20)	143	NM_001038619	Mm.441620	NM_172646	ENSMUSG00000040265	Dnm3	9630020E24Rik|AW061159|B230343F03Rik|C530045C17|mKIAA0820	dynamin 3	protein-coding	Dnm3	10359480	0.994691	0.269008	12	0	0.0636113	7.21631	7.26713	7.31409	7.45824	7.25704	7.24053
18786	chr4-314	chr4	94603009	94603279	+	17.5	0.592	5' UTR (NM_172695, exon 1 of 14)	5' UTR (NM_172695, exon 1 of 14)	103	NM_172695	Mm.490101	NM_172695	ENSMUSG00000028577	Plaa	2410007N06|AI536418|AU018445|AW208417|D4Ertd618e|PLA2P|PLAP|Ufd3	phospholipase A2, activating protein	protein-coding	Plaa	10514405	1	0.785093	12	1	0.0922279	639.256	629.756	628.98	702.946	675.733	646.883
232853	chr7-739	chr7	7121175	7121445	+	11.7	0.621	5' UTR (NM_172738, exon 1 of 5)	5' UTR (NM_172738, exon 1 of 5)	166	NM_172738	Mm.23838	NM_172738	ENSMUSG00000062116	Zfp954	5730403M16Rik|8030437F07|AA123315	zinc finger protein 954	protein-coding	Zfp954	10559820	0.66424	0.125235	12	1	0.18138	54.6959	66.6439	51.1166	73.965	57.7909	58.9296
236790	chrX-122	chrX	56454883	56455153	+	9.48	0.583	5' UTR (NM_172779, exon 1 of 17)	5' UTR (NM_172779, exon 1 of 17)	179	NM_172779	Mm.474772	NM_172779	ENSMUSG00000035967	Ints6l	4930535D10Rik|6330505F04Rik|D130066O12|Ddx26b	integrator complex subunit 6 like	protein-coding	Ddx26b	10599696	0.786454	0.171619	12	1.5	0.0334638	7.94721	7.9891	8.01878	7.97669	7.89356	7.84611
237886	chr11-1683	chr11	82991544	82991814	+	9.48	0.737	5' UTR (NM_172796, exon 1 of 5)	5' UTR (NM_172796, exon 1 of 5)	151	NM_172796	Mm.270253	NM_172796	ENSMUSG00000069793	Slfn9	9830137M10Rik	schlafen 9	protein-coding	Slfn9	10389134	1	0.65207	12	4	0.00291328	22.7257	22.7906	23.2074	22.5765	22.0933	23.3978
242521	chr4-253	chr4	88722172	88722442	+	16	0.781	5' UTR (NM_172871, exon 1 of 1)	5' UTR (NM_172871, exon 1 of 1)	201	NM_172871	Mm.260601	NM_172871	ENSMUSG00000070923	Klhl9	8030469P05|C530050O22Rik|ENSMUSG00000070923|mKIAA1354	kelch-like 9	protein-coding	Klhl9	10505839	1	0.886572	24	9.5	0.086069	33.4784	36.4256	34.3143	38.854	35.6995	32.3573
242669	chr4-502	chr4	128962181	128962451	+	13.9	0.561	5' UTR (NM_172875, exon 1 of 11)	5' UTR (NM_172875, exon 1 of 11)	139	NM_001301841	Mm.215814	NM_172875	ENSMUSG00000028789	Azin2	4933429I20Rik|Adc|Azi2|B930082O19|ODC-p|Odcp	antizyme inhibitor 2	protein-coding	Adc	10516529	1	1	20	11.5	0.0443545	6.13622	5.86314	6.00848	5.91549	6.16101	5.95572
242736	chr4-536	chr4	143412772	143413042	+	13.1	0.556	5' UTR (NM_172877, exon 1 of 5)	5' UTR (NM_172877, exon 1 of 5)	481	NM_172877	Mm.275953	NM_172877	ENSMUSG00000046862	Pramef8	4732496O08Rik|AU023234	PRAME family member 8	protein-coding	Pramef8	10510061	0.505682	0.0762022	24	9	0.0578838	117.116	102.364	120.912	144.012	114.242	102.856
72145	chr5-738	chr5	102069576	102069846	+	11.7	0.576	5' UTR (NM_172882, exon 1 of 67)	5' UTR (NM_172882, exon 1 of 67)	210	NM_172882	Mm.332522	NM_172882	ENSMUSG00000043940	Wdfy3	2610509D04Rik|ALFY|AW319683|B930017C24|BWF1|Bchs|D5Ertd66e|Ggtb3|ZFYVE25|mKIAA0993	WD repeat and FYVE domain containing 3	protein-coding	Wdfy3	10523577	1	1	20	12.5	0.0271773	346.351	310.582	347.324	309.259	339.258	299.24
244713	chr9-569	chr9	19622077	19622347	+	12.4	0.655	5' UTR (NM_172918, exon 1 of 9)	5' UTR (NM_172918, exon 1 of 9)	121	NM_172918	Mm.67366	NM_172918	ENSMUSG00000057551	Zfp317	4932416G03|D230022C05Rik|KRAB9|Zfp67|Zfp75|mszf40	zinc finger protein 317	protein-coding	Zfp317	10583402	0.66424	0.125235	24	11	0.025873	208.987	219.072	213.089	227.487	185.291	207.752
244721	chr9-928	chr9	20581420	20581690	+	9.48	0.696	5' UTR (NM_172919, exon 1 of 6)	5' UTR (NM_172919, exon 1 of 6)	227	NM_172919	Mm.86627	NM_172919	ENSMUSG00000058192	Zfp846	2210010B09Rik|9130221F13|Znf846	zinc finger protein 846	protein-coding	Zfp846	10583450	0.994691	0.269008	24	11	0.0285883	89.1758	92.2054	94.8259	98.1815	92.1122	95.1235
271564	chr19-113	chr19	16780658	16780928	+	19.7	0.667	5' UTR (NM_173028, exon 1 of 72)	5' UTR (NM_173028, exon 1 of 72)	140	NM_173028	Mm.211963	NM_173028	ENSMUSG00000046230	Vps13a	4930425F11|4930516E05Rik|4930543C13Rik|9930023P20|Chac|Chorein|D330038K10Rik|mKIAA0986	vacuolar protein sorting 13A	protein-coding	Vps13a	10466441	0.66424	0.125235	12	2	0.0834032	314.359	315.501	290.733	318.511	351.062	344.333
244329	chr8-216	chr8	18595261	18595531	+	19.7	0.615	5' UTR (NM_173189, exon 1 of 14)	5' UTR (NM_173189, exon 1 of 14)	223	NM_173189	Mm.235296	NM_173189	ENSMUSG00000039842	Mcph1	5430437K10Rik|BRIT1|D030046N04Rik|MCT	microcephaly, primary autosomal recessive 1	protein-coding	Mcph1	10570556	1	1	20	12.5	0.0173249	107.106	109.025	119.152	121.288	120.039	119.167
209456	chr1-785	chr1	182409185	182409455	+	11.7	0.679	5' UTR (NM_173378, exon 1 of 18)	5' UTR (NM_173378, exon 1 of 18)	153	NM_173378	Mm.287450	NM_173378	ENSMUSG00000026510	Trp53bp2	53BP2|AI746547|ASPP2|PPP1R13A|Tp53bp2|X98550	transformation related protein 53 binding protein 2	protein-coding	Trp53bp2	10352396	0.922182	0.232281	24	18	0.0982878	228.062	202.328	207.575	209.919	205.759	231.013
73473	chr18-248	chr18	32067826	32068096	+	13.9	0.714	5' UTR (NM_173441, exon 1 of 14)	5' UTR (NM_173441, exon 1 of 14)	227	NM_173441	Mm.66853	NM_173441	ENSMUSG00000024384	Iws1	1700069O15Rik|3000008H23|AL117927|AW214353	IWS1, SUPT6 interacting protein	protein-coding	Iws1	10454525	0.242857	0.0211898	24	8	0.00952473	331.446	318.376	348.129	345.088	321.267	312.894
209586	chr11-130	chr11	6200032	6200302	+	24.8	0.657	5' UTR (NM_173748, exon 1 of 6)	5' UTR (NM_173748, exon 1 of 6)	284	NM_173748	Mm.25321	NM_173748	ENSMUSG00000053838	Nudcd3	AI427847|BC024322|mKIAA1068	NudC domain containing 3	protein-coding	Nudcd3	10384092	1	0.693388	12	0	0.169868	371.225	314.283	351.329	381.209	387.134	369.062
67892	chr8-353	chr8	126422537	126422807	+	14.6	0.5	5' UTR (NM_174987, exon 1 of 2)	5' UTR (NM_174987, exon 1 of 2)	171	NM_174987	Mm.31946	NM_174987	ENSMUSG00000051671	Coa6	1810063B05Rik|AI447995	cytochrome c oxidase assembly factor 6	protein-coding	1810063B05Rik	10576598	1	0.610752	24	17	0	6.69323	6.23224	6.48787	6.38274	6.49163	6.4763
66125	chr10-559	chr10	13008421	13008691	+	13.1	0.59	5' UTR (NM_175102, exon 1 of 1)	5' UTR (NM_175102, exon 1 of 1)	106	NM_175102	Mm.29743	NM_175102	ENSMUSG00000078348	Sf3b5	10kDa|1110005L13Rik|AU043053|Sf3b10	splicing factor 3b, subunit 5	protein-coding	Sf3b5	10361767	0.304521	0.0311014	12	1	0.0544755	164.985	151.102	166.638	175.677	165.559	154.485
70097	chr10-250	chr10	8885734	8886004	+	19	0.627	5' UTR (NM_175155, exon 1 of 20)	5' UTR (NM_175155, exon 1 of 20)	201	NM_175155	Mm.338275	NM_175155	ENSMUSG00000015305	Sash1	1100001C18Rik|2500002E12Rik|A330076K04Rik|mKIAA0790	SAM and SH3 domain containing 1	protein-coding	Sash1	10367746	0.0264474	0.000699194	24	7.5	0.213575	151.772	184.626	203.32	187.117	134.495	144.087
70683	chr10-882	chr10	88826541	88826811	+	9.48	0.548	5' UTR (NM_175158, exon 1 of 62)	5' UTR (NM_175158, exon 1 of 62)	138	NM_175158	Mm.29631	NM_175158	ENSMUSG00000004356	Utp20	3830408P06Rik|AA617408|Drim|mDRIM|mDRIN	UTP20 small subunit processome component	protein-coding	Utp20	10371676	0.852649	0.199965	24	13.5	0.104977	153.487	155.044	164.178	177.387	173.328	160.041
71801	chr4-1300	chr4	11007324	11007594	+	9.48	0.567	5' UTR (NM_175175, exon 1 of 2)	5' UTR (NM_175175, exon 1 of 2)	160	NM_175175	Mm.34351	NM_175175	ENSMUSG00000049969	Plekhf2	1110070J07Rik|AA673237|ZFYVE18	pleckstrin homology domain containing, family F (with FYVE domain) member 2	protein-coding	Plekhf2	10511498	0.505682	0.0762022	24	9.5	0.117882	204.505	245.962	252.572	248.772	220.977	206.137
77371	chr11-548	chr11	51756360	51756630	+	15.3	0.682	5' UTR (NM_175255, exon 1 of 23)	5' UTR (NM_175255, exon 1 of 23)	339	NM_001290785	Mm.33878	NM_175255	ENSMUSG00000036391	Sec24a	-	Sec24 related gene family, member A (S. cerevisiae)	protein-coding	Sec24a	10385719	0.608446	0.10647	24	5	0.00507703	9.82548	9.89019	9.65384	9.82087	9.66915	9.77492
108927	chr3-365	chr3	53041596	53041866	+	13.1	0.667	5' UTR (NM_175386, exon 1 of 4)	5' UTR (NM_175386, exon 1 of 4)	184	NM_175386	Mm.118617	NM_175386	ENSMUSG00000048332	Lhfp	2810489O06Rik|AI194968	lipoma HMGIC fusion partner	protein-coding	Lhfp	10491970	0.34014	0.0374712	24	11.5	0.129655	173.198	205.822	214.124	218.193	202.785	202.895
93686	chr15-185	chr15	77306816	77307086	+	18.2	0.63	5' UTR (NM_175387, exon 1 of 13)	5' UTR (NM_175387, exon 1 of 13)	102	NM_001110827	Mm.202774	NM_053104	ENSMUSG00000033565	Rbfox2	Fbm2|Fxh|Hrnbp2|Rbm9	RNA binding protein, fox-1 homolog (C. elegans) 2	protein-coding	Rbfox2	10430145	0.304521	0.0311014	24	14.5	0.101781	8.96725	8.86453	9.20554	9.09988	9.09596	9.11642
269997	chr7-253	chr7	127375807	127376077	+	18.2	0.622	5' UTR (NM_175560, exon 1 of 3)	5' UTR (NM_175560, exon 1 of 3)	108	NM_175560	Mm.221270	NM_175560	ENSMUSG00000054381	Zfp747	6430604K15Rik	zinc finger protein 747	protein-coding	Zfp747	10568228	1	1	20	12.1667	0.017603	143.555	120.463	129.539	130.202	134.924	139.479
218210	chr13-464	chr13	46727466	46727736	+	11.7	0.639	5' UTR (NM_175749, exon 1 of 22)	5' UTR (NM_175749, exon 1 of 22)	248	NM_175749	Mm.255398	NM_175749	ENSMUSG00000021374	Nup153	B130015D15Rik|C88147	nucleoporin 153	protein-coding	Nup153	10408952	1	0.610752	12	2	0.0586687	981.599	956.944	926.547	973.772	947.866	932.293
320213	chr16-207	chr16	32002895	32003165	+	15.3	0.667	5' UTR (NM_177103, exon 1 of 10)	5' UTR (NM_177103, exon 1 of 10)	257	NM_177103	Mm.152890	NM_023801	ENSMUSG00000022772	Senp5	6230429P13Rik|A730063F07Rik|AI851888|BB189556|SMT3IP3	SUMO/sentrin specific peptidase 5	protein-coding	Senp5	10439021	0.304521	0.0311014	12	2	0.0627133	7.95686	7.88514	7.80477	7.9855	7.78184	7.74374
320253	chr18-136	chr18	56925288	56925558	+	17.5	0.544	5' UTR (NM_177115, exon 1 of 5)	5' UTR (NM_177115, exon 1 of 5)	125	NM_177115	Mm.312623	NM_177115	ENSMUSG00000032656	2017-03-03	6330411I15Rik|A530081L18Rik|AI843639|MARCH-III	membrane-associated ring finger (C3HC4) 3	protein-coding	41701	10458983	1	1	20	7.83333	0.0129047	6.06905	6.04331	5.96091	5.97235	5.98183	6.12951
666173	chr15-612	chr15	35371606	35371876	+	10.2	0.6	5' UTR (NM_177151, exon 1 of 62)	5' UTR (NM_177151, exon 1 of 62)	195	NM_177151	Mm.309250	NM_177151	ENSMUSG00000037646	Vps13b	1810042B05Rik|2310042E16Rik|4732488H20|C330002D13Rik|C87206|Coh1|D230005K13|mKIAA0532|mKIAA5032	vacuolar protein sorting 13B	protein-coding	Vps13b	10423663	0.505682	0.0762022	24	7	0.0582585	276.714	332.5	290.58	293.523	279.226	274.049
224105	chr16-232	chr16	32078986	32079256	+	14.6	0.579	5' UTR (NM_177326, exon 1 of 15)	5' UTR (NM_177326, exon 1 of 15)	221	NM_177326	Mm.234204	NM_177326	ENSMUSG00000022781	Pak2	5330420P17Rik|A130002K10Rik|AI836325|D16Ertd269e|PAK-2|mKIAA4182	p21 protein (Cdc42/Rac)-activated kinase 2	protein-coding	Pak2	10439032	0.852649	0.199965	24	5	0.0024183	464.969	497.158	438.955	495.981	426.068	455.416
227743	chr2-395	chr2	34406956	34407226	+	15.3	0.585	5' UTR (NM_177345, exon 1 of 12)	5' UTR (NM_177345, exon 1 of 12)	240	NM_177345	Mm.270866	NM_177345	ENSMUSG00000038696	Mapkap1	AI591529|D230039K05Rik|Sin1	mitogen-activated protein kinase associated protein 1	protein-coding	Mapkap1	10471571	1	0.357622	24	7	0.0304834	446.904	419.329	461.271	489.064	447.691	437.282
64453	chr10-720	chr10	76032602	76032872	+	10.9	0.655	5' UTR (NM_177475, exon 1 of 2)	5' UTR (NM_177475, exon 1 of 2)	125	NM_177475	Mm.80609	NM_177475	ENSMUSG00000049764	Zfp280b	D10Jhu82e|Suhw2	zinc finger protein 280B	protein-coding	Zfp280b	10364130	0.922182	0.232281	24	5	0.0478641	259.939	256.522	244.286	238.663	243.531	260.831
70354	chr2-446	chr2	125782630	125782900	+	15.3	0.727	5' UTR (NM_177608, exon 1 of 18)	5' UTR (NM_177608, exon 1 of 18)	105	NM_177608	Mm.138091	NM_133725	ENSMUSG00000035093	Secisbp2l	3110001I20Rik|AI504340|C630011I23	SECIS binding protein 2-like	protein-coding	Secisbp2l	10487154	0.994691	0.269008	24	5	0.0305187	8.36045	8.40214	8.44584	8.58165	8.35898	8.39302
223732	chr15-452	chr15	84557441	84557711	+	11.7	0.636	5' UTR (NM_177630, exon 1 of 1)	5' UTR (NM_177630, exon 1 of 1)	247	NM_177630	Mm.6471	NM_177630	ENSMUSG00000055745	Ldoc1l	BC058638|Mar6|Mart6	leucine zipper, down-regulated in cancer 1-like	protein-coding	Ldoc1l	10431147	1	0.785093	24	14	0.0743947	103.789	91.0401	108.382	85.4827	108.11	88.631
232430	chr6-256	chr6	134830255	134830525	+	16.8	0.556	5' UTR (NM_177687, exon 1 of 5)	5' UTR (NM_177687, exon 1 of 5)	191	NM_177687	Mm.267010	NM_177687	ENSMUSG00000032652	Crebl2	AI046348|B230205M03	cAMP responsive element binding protein-like 2	protein-coding	Crebl2	10542302	1	1	20	8.83333	0.0313091	278.714	272.275	284.345	297.949	293.572	250.089
106894	chr18-254	chr18	61176713	61176983	+	14.6	0.649	5' UTR (NM_178277, exon 1 of 20)	5' UTR (NM_178277, exon 1 of 20)	201	NM_178277	Mm.22574	NM_134134	ENSMUSG00000024622	Hmgxb3	2510002C16Rik|A630042L21Rik|AI413166|mKIAA0194	HMG box domain containing 3	protein-coding	Hmgxb3	10459158	0.418067	0.0538095	12	1	0.06487	7.63265	7.54091	7.57973	7.65679	7.6028	7.60364
94185	chr17-533	chr17	43016533	43016803	+	13.1	0.561	5' UTR (NM_178589, exon 1 of 6)	5' UTR (NM_178589, exon 1 of 6)	113	NM_178589	Mm.200792	NM_178589	ENSMUSG00000023915	Tnfrsf21	AA959878|DR6|R74815|TR7	tumor necrosis factor receptor superfamily, member 21	protein-coding	Tnfrsf21	10445241	0.111763	0.00609984	24	16	0.156483	844.867	717.92	866.106	952.001	862.308	907.674
52679	chr10-221	chr10	110745530	110745800	+	17.5	0.718	5' UTR (NM_178609, exon 1 of 13)	5' UTR (NM_178609, exon 1 of 13)	200	NM_178609	Mm.11747	NM_178609	ENSMUSG00000020185	E2f7	A630014C11Rik|D10Ertd739e	E2F transcription factor 7	protein-coding	E2f7	10366277	1	0.536501	12	7	0.106702	97.3406	92.8243	97.0112	83.2559	99.9102	103.014
235527	chr9-583	chr9	92457640	92457910	+	11.7	0.657	5' UTR (NM_178711, exon 1 of 9)	5' UTR (NM_178711, exon 1 of 9)	397	NM_178711	Mm.55289	NM_178711	ENSMUSG00000032377	Plscr4	AV245873	phospholipid scramblase 4	protein-coding	Plscr4	10587818	1	0.536501	12	0	0.0994687	195.579	177.41	179.082	172.507	181.002	171.783
229543	chr3-126	chr3	90433388	90433658	+	16.8	0.516	5' UTR (NM_178876, exon 1 of 31)	5' UTR (NM_178876, exon 1 of 31)	113	NM_145540	Mm.268564	NM_145540	ENSMUSG00000027933	Ints3	C77668	integrator complex subunit 3	protein-coding	Ints3	10499777	1	0.610752	24	5.5	0.00418607	234.62	253.735	230.914	254.084	232.868	235.637
76438	chr17-539	chr17	50190211	50190481	+	14.6	0.719	5' UTR (NM_181397, exon 1 of 10)	5' UTR (NM_181397, exon 1 of 10)	151	NM_181397	Mm.41854	NM_181397	ENSMUSG00000039316	Rftn1	2310015N21Rik|AI853526	raftlin lipid raft linker 1	protein-coding	Rftn1	10451710	0.0442516	0.00150322	24	8	0.191195	145.511	176.3	157.599	168.378	137.743	126.795
107305	chr19-107	chr19	10688788	10689058	+	19	0.653	5' UTR (NM_181403, exon 1 of 5)	5' UTR (NM_181403, exon 1 of 5)	108	NM_181403	Mm.19091	NM_181403	ENSMUSG00000048832	Vps37c	5730409F24Rik|AU042646	vacuolar protein sorting 37C	protein-coding	Vps37c	10461547	1	0.998554	12	0	0.0306389	205.709	190.405	210.184	225.512	181.424	206.096
226255	chr19-130	chr19	57611175	57611445	+	16.8	0.69	5' UTR (NM_181415, exon 1 of 29)	5' UTR (NM_181415, exon 1 of 29)	276	NM_181415	Mm.245340	NM_181415	ENSMUSG00000054843	Atrnl1	AI504415|AW555641|Alp|Atrnl|Atrnlp	attractin like 1	protein-coding	Atrnl1	10464251	0.34014	0.0374712	12	1.5	0.0383711	163.663	191.18	191.239	196.818	183.532	164.083
252903	chr1-1530	chr1	79671719	79671989	+	9.48	0.6	5' UTR (NM_183027, exon 1 of 5)	5' UTR (NM_183027, exon 1 of 5)	118	NM_183027	Mm.32409	NM_183027	ENSMUSG00000054702	Ap1s3	1190009B22|Jr2|[s]3A	adaptor-related protein complex AP-1, sigma 3	protein-coding	Ap1s3	10355967	0.34014	0.0374712	24	2	0.125207	35.8048	56.511	45.7082	41.0312	43.3963	49.0632
319263	chr1-210	chr1	7088923	7089193	+	19.7	0.636	5' UTR (NM_183028, exon 1 of 6)	5' UTR (NM_183028, exon 1 of 6)	138	NM_183028	Mm.21539	NM_183028	ENSMUSG00000051285	Pcmtd1	8430411F12Rik|A030012M09Rik	protein-L-isoaspartate (D-aspartate) O-methyltransferase domain containing 1	protein-coding	Pcmtd1	10344707	0.460888	0.0641441	12	2	0	9.39885	9.31624	9.46252	9.45036	9.48905	9.23967
329470	chr2-1152	chr2	93849535	93849805	+	12.4	0.667	5' UTR (NM_183220, exon 1 of 15)	5' UTR (NM_183220, exon 1 of 15)	129	NM_183220	Mm.486910	NM_183220	ENSMUSG00000040272	Accs	2610203E10Rik|Phacs	1-aminocyclopropane-1-carboxylate synthase (non-functional)	protein-coding	Accs	10485241	1	0.693388	24	9	0.0882116	64.1701	53.8558	56.7544	53.281	49.8313	49.6011
77987	chr10-417	chr10	50592684	50592954	+	16	0.659	5' UTR (NM_198007, exon 1 of 42)	5' UTR (NM_198007, exon 1 of 42)	150	NM_198007	Mm.222497	NM_198007	ENSMUSG00000038774	Ascc3	ASC1p200|B630009I04Rik|BC023451|D430001L07Rik|D630041L21|Helic1|RNAH	activating signal cointegrator 1 complex subunit 3	protein-coding	Ascc3	10363007	1	0.357622	12	1.5	0.125893	287.538	303.918	269.298	315.131	299.74	281.484
231474	chr5-752	chr5	97111322	97111592	+	10.2	0.657	5' UTR (NM_198422, exon 1 of 7)	5' UTR (NM_198422, exon 1 of 7)	139	NM_198422	Mm.332505	NM_198422	ENSMUSG00000055725	Paqr3	6330415A20Rik|AY424292|RKTG	progestin and adipoQ receptor family member III	protein-coding	Paqr3	10531544	1	0.610752	24	13.5	0.110295	128.106	125.918	155.051	149.956	157.976	149.413
380993	chr15-74	chr15	68258576	68258846	+	19	0.571	5' UTR (NM_198644, exon 1 of 16)	5' UTR (NM_198644, exon 1 of 16)	145	NM_198644	Mm.309526	NM_198644	ENSMUSG00000022335	Zfat	Gm922|Zfat1|Zfp406	zinc finger and AT hook domain containing	protein-coding	Zfat	10429178	1	0.785093	12	0	0.0358645	64.6631	62.4292	68.0376	61.9216	61.1618	67.8337
68549	chr1-302	chr1	57996017	57996287	+	16.8	0.583	5' UTR (NM_199007, exon 1 of 9)	5' UTR (NM_199007, exon 1 of 9)	178	NM_199007	Mm.32800	NM_199007	ENSMUSG00000026039	Sgol2a	1110007N04Rik|4932411A20Rik|5730576N04Rik|AU018846|AV008062|D1Ertd8e|Sgol2|Tripin	shugoshin-like 2a (S. pombe)	protein-coding	Sgol2	10346365	0.242857	0.0211898	24	15.5	6.28e-16	5.2427	5.30934	5.74291	5.82878	5.57512	5.88092
382090	chr9-810	chr9	87255143	87255413	+	10.9	0.625	5' UTR (NM_199316, exon 1 of 27)	5' UTR (NM_199316, exon 1 of 27)	254	NM_199316	Mm.335338	NM_199316	ENSMUSG00000056919	Cep162	4922501C03Rik|mKIAA1009	centrosomal protein 162	protein-coding	4922501C03Rik	10595529	1	0.536501	12	3	0.0134633	6.00397	6.17171	5.98861	5.94095	6.00354	5.82163
23922	chr3-94	chr3	90231568	90231838	+	21.1	0.679	5' UTR (NM_206924, exon 1 of 5)	5' UTR (NM_206924, exon 1 of 5)	106	NM_206924	Mm.13912	NM_206924	ENSMUSG00000027937	Jtb	Gm622	jumping translocation breakpoint	protein-coding	Jtb	10493703	1	0.31062	12	1	0.162026	893.436	798.656	823.452	835.827	785.267	805.494
218232	chr13-394	chr13	48625422	48625692	+	12.4	0.633	5' UTR (NM_207232, exon 1 of 10)	5' UTR (NM_207232, exon 1 of 10)	115	NM_207232	Mm.315089	NM_207232	ENSMUSG00000038042	Ptpdc1	AI843923|AW456874|Naa-1|Ptpcd1	protein tyrosine phosphatase domain containing 1	protein-coding	Ptpdc1	10409065	1	0.785093	12	11	0.0247912	97.3548	95.5683	103.156	96.4367	97.8025	89.0393
104625	chr11-807	chr11	49712327	49712597	+	13.1	0.535	5' UTR (NM_212484, exon 1 of 12)	5' UTR (NM_212484, exon 1 of 12)	260	NM_212484	Mm.247113	NM_212484	ENSMUSG00000020362	Cnot6	CCR4	CCR4-NOT transcription complex, subunit 6	protein-coding	Cnot6	10385557	0.994691	0.269008	24	6	0.0386646	225.959	292.85	255.624	281.118	246.117	248.426
98496	chr1-912	chr1	84284212	84284482	+	9.48	0.762	exon (NM_001003948, exon 1 of 3)	exon (NM_001003948, exon 1 of 3)	298	NM_001003948	Mm.187470	NM_001003948	ENSMUSG00000045658	Pid1	5033414K04Rik|NYGGF4	phosphotyrosine interaction domain containing 1	protein-coding	Pid1	10356172	0.128197	0.00758419	24	6.5	0.0641629	127.748	143.746	138.272	125.403	128.488	122.501
434203	chr7-103	chr7	81124838	81125108	+	19.7	0.757	exon (NM_001004184, exon 6 of 18)	exon (NM_001004184, exon 6 of 18)	10174	NM_001004184	Mm.389909	NM_001004184	ENSMUSG00000025726	Slc28a1	Cnt1	solute carrier family 28 (sodium-coupled nucleoside transporter), member 1	protein-coding	Slc28a1	10554502	1	1	20	10.8333	0.0131176	103.344	92.9833	91.2043	94.9081	98.7754	89.5511
242894	chr5-550	chr5	25759955	25760225	+	14.6	0.538	exon (NM_001004365, exon 1 of 12)	exon (NM_001004365, exon 1 of 12)	117	NM_001310504	Mm.150319	NM_001004365	ENSMUSG00000056367	Actr3b	9630005C02|ARP11|AW047569|Arp3b|Arp3beta	ARP3 actin-related protein 3B	protein-coding	Actr3b	10520304	1	1	20	11.8333	0.0996848	7.51448	7.48082	7.30227	7.69069	7.71218	7.74147
13983	chr12-130	chr12	76104972	76105242	+	18.2	0.574	exon (NM_001005510, exon 110 of 116)	exon (NM_001005510, exon 110 of 116)	72152	NR_104386	Mm.2561	NM_010157	ENSMUSG00000021055	Esr2	ER[b]|ERbeta|Estrb	estrogen receptor 2 (beta)	protein-coding	Esr2	10401035	1	0.357622	24	17	0.0213546	5.09126	5.02331	4.96398	5.10367	5.1891	4.97684
234663	chr8-333	chr8	104442347	104442617	+	17.5	0.519	exon (NM_001013380, exon 2 of 13)	exon (NM_001013380, exon 2 of 13)	565	NM_001013380	Mm.289583	NM_001013380	ENSMUSG00000035770	Dync1li2	AA409702|C920003I06|Dncli2|Dnclic2|LIC2	dynein, cytoplasmic 1 light intermediate chain 2	protein-coding	Dync1li2	10574478	1	1	20	12.8333	0.017376	116.961	100.672	103.828	103.172	115.517	106.656
237926	chr11-546	chr11	94548939	94549209	+	16	0.568	exon (NM_001013381, exon 1 of 9)	exon (NM_001013381, exon 1 of 9)	133	NM_001013381	Mm.342275	NM_001013381	ENSMUSG00000039096	Rsad1	B430319G23|BC056485	radical S-adenosyl methionine domain containing 1	protein-coding	Rsad1	10390022	0.0183135	0.00040883	24	18	0.155047	152.175	108.321	127.604	153.249	151.959	154.684
268958	chr17-731	chr17	45642747	45643017	+	10.9	0.842	exon (NM_001013767, exon 5 of 22)	exon (NM_001013767, exon 5 of 22)	16427	NM_001013767	Mm.426026	NM_001013767	ENSMUSG00000058626	Capn11	-	calpain 11	protein-coding	Capn11	10451145	1	0.536501	12	8	0.00382545	29.831	27.9189	32.3688	27.6161	27.542	29.2438
381260	chr1-357	chr1	59516299	59516569	+	15.3	0.639	exon (NM_001013771, exon 1 of 20)	exon (NM_001013771, exon 1 of 20)	170	NM_001013771	Mm.486706	NM_001013771	ENSMUSG00000047361	Gm973	AW554518	predicted gene 973	protein-coding	Gm973	10346611	1	1	20	8.16667	0	29.4995	25.1253	30.1139	29.4591	26.0689	25.5388
75691	chr4-355	chr4	47057010	47057280	+	16.8	0.593	exon (NM_001024136, exon 1 of 15)	exon (NM_001024136, exon 1 of 15)	161	NM_001024136	Mm.86866	NM_001024136	ENSMUSG00000066191	Anks6	2210417J20Rik|Ankrd14|Gm635|SamCystin|Samd6|b2b1801.1Clo	ankyrin repeat and sterile alpha motif domain containing 6	protein-coding	Anks6	10512830	1	0.998554	24	10	0.0451276	58.0651	50.4083	58.5363	51.8	51.1967	52.8657
269473	chr3-452	chr3	104511333	104511603	+	11.7	0.514	exon (NM_001025067, exon 1 of 18)	exon (NM_001025067, exon 1 of 18)	450	NM_001025067	Mm.34855	NM_001025067	ENSMUSG00000032913	Lrig2	4632419I10Rik|BB096938|LIG-2	leucine-rich repeats and immunoglobulin-like domains 2	protein-coding	Lrig2	10500876	1	1	20	7.5	0.0581179	141.542	168.864	164.144	162.961	148.198	141.126
13347	chr4-126	chr4	149104171	149104441	+	20.4	0.68	exon (NM_001025296, exon 1 of 6)	exon (NM_001025296, exon 1 of 6)	164	NR_104263	Mm.41433	NM_010044	ENSMUSG00000028974	Dffa	A330085O09Rik|DFF35|Dff45|ICAD|ICAD-L|ICAD-S	DNA fragmentation factor, alpha subunit	protein-coding	Dffa	10510452	0.723213	0.146835	12	10.5	0.121177	8.69209	8.49278	8.72532	8.86629	8.58615	8.64232
12914	chr16-122	chr16	4213042	4213312	+	21.1	0.66	exon (NM_001025432, exon 1 of 31)	exon (NM_001025432, exon 1 of 31)	227	NM_001025432	Mm.132238	NM_001025432	ENSMUSG00000022521	Crebbp	AW558298|CBP|CBP/p300|KAT3A|p300/CBP	CREB binding protein	protein-coding	Crebbp	10437330	1	0.693388	12	0	0.0392727	208.212	200.349	222.045	241.286	185.033	186.524
378430	chr7-855	chr7	18957578	18957848	+	11.7	0.677	exon (NM_001029877, exon 4 of 4)	exon (NM_001029877, exon 4 of 4)	-29811	NM_194064	Mm.277153	NM_194064	ENSMUSG00000051965	Nanos2	nos2	nanos homolog 2 (Drosophila)	protein-coding	Nanos2	10550519	1	1	20	12.5	0.00141893	31.3	30.7853	33.407	30.9273	30.1204	32.1501
245827	chr11-1209	chr11	55262268	55262538	+	13.1	0.656	exon (NM_001029988, exon 18 of 23)	exon (NM_001029988, exon 18 of 23)	49854	NM_001029988	Mm.339363	NM_001029988	ENSMUSG00000055333	Fat2	EMI2|Fath2|Gm523|mKIAA0811	FAT atypical cadherin 2	protein-coding	Fat2	10386033	1	0.610752	12	8	0.0453255	55.4925	48.5608	54.1846	54.3802	51.6125	53.5461
52535	chr14-340	chr14	51884818	51885088	+	12.4	0.583	exon (NM_001029990, exon 1 of 14)	exon (NM_001029990, exon 1 of 14)	111	NM_001029990	Mm.5750	NM_001029990	ENSMUSG00000004561	Mettl17	2310032K15Rik|D14Ertd209e|Mett11d1	methyltransferase like 17	protein-coding	Mettl17	10414594	1	1	20	7.16667	0.0095923	105.377	94.7721	110.402	91.9559	90.6553	88.8746
72429	chr4-300	chr4	59003187	59003457	+	14.6	0.608	exon (NM_001033165, exon 1 of 4)	exon (NM_001033165, exon 1 of 4)	129	NM_001033165	Mm.317801	NM_001033165	ENSMUSG00000070972	Dnajc25	2010109C08Rik|2010203O07Rik	DnaJ heat shock protein family (Hsp40) member C25	protein-coding	Dnajc25	10505172	0.608446	0.10647	24	14	0.157296	165.651	142.309	164.142	179.531	177.472	152.113
98488	chr1-888	chr1	54438766	54439036	+	10.9	0.63	exon (NM_001033194, exon 1 of 18)	exon (NM_001033194, exon 1 of 18)	125	NM_001033194	Mm.25856	NM_001033194	ENSMUSG00000041303	Gtf3c3	TF3C-gamma|TFIIIC102	general transcription factor IIIC, polypeptide 3	protein-coding	Gtf3c3	10354630	0.66424	0.125235	24	13	0.138522	164.42	145.659	151.633	191.431	185.377	162.254
107368	chr19-201	chr19	59344995	59345265	+	16	0.714	exon (NM_001033222, exon 1 of 5)	exon (NM_001033222, exon 1 of 5)	650	NM_001033222	Mm.27250	NM_001033222	ENSMUSG00000074746	Pdzd8	A630041P07Rik|AV329468|AW228944|Pdzk8	PDZ domain containing 8	protein-coding	Pdzd8	10468789	0.608446	0.10647	12	1	0.0607829	306.489	339.277	333.696	372.088	301.8	319.114
228715	chr2-1046	chr2	144594031	144594301	+	10.9	0.696	exon (NM_001033297, exon 1 of 2)	exon (NM_001033297, exon 1 of 2)	101	NM_001033297	Mm.27391	NM_001033297	ENSMUSG00000074754	Gm561	-	predicted gene 561	protein-coding	Gm561	10476725	1	0.469977	12	0.5	0.193776	219.117	203.489	227.528	234.03	212.226	215.283
231430	chr5-267	chr5	90223726	90223996	+	18.2	0.643	exon (NM_001033310, exon 1 of 6)	exon (NM_001033310, exon 1 of 6)	135	NM_001163456	Mm.319697	NM_001033310	ENSMUSG00000035505	Cox18	BC038311	cytochrome c oxidase assembly protein 18	protein-coding	Cox18	10531208	1	1	20	9.16667	0.00410672	9.24631	9.10976	9.30189	9.13336	9.13434	9.26254
234740	chr8-347	chr8	111933340	111933610	+	15.3	0.714	exon (NM_001033321, exon 2 of 7)	exon (NM_001033321, exon 2 of 7)	316	NM_001033321	Mm.87513	NM_001033321	ENSMUSG00000031951	Tmem231	4932417I16Rik|Gm178	transmembrane protein 231	protein-coding	Tmem231	10581917	0.34014	0.0374712	24	19	0.0665105	74.0065	68.0772	74.931	72.4503	73.1649	86.9498
243621	chr6-932	chr6	121473062	121473332	+	8.02	0.722	exon (NM_001033354, exon 1 of 14)	exon (NM_001033354, exon 1 of 14)	481	NM_001033354	Mm.299442	NM_001033354	ENSMUSG00000040797	Iqsec3	AK122446|BRAG3|mKIAA1110|synarfGEF	IQ motif and Sec7 domain 3	protein-coding	Iqsec3	10547575	1	1	20	13.5	0.0181876	57.756	58.531	63.8693	55.3419	59.3814	60.2496
433864	chr5-964	chr5	29434959	29435229	+	10.2	0.586	exon (NM_001033457, exon 1 of 11)	exon (NM_001033457, exon 1 of 11)	427	NM_001033457	Mm.262815	NM_001033457	ENSMUSG00000001569	Nom1	D5Kng1|Gm1040	nucleolar protein with MIF4G domain 1	protein-coding	Nom1	10520405	0.242857	0.0211898	12	1	0.163511	129.605	119.594	126.112	132.751	129.04	118.898
432879	chr14-435	chr14	79452307	79452577	+	10.2	0.68	exon (NM_001034882, exon 1 of 1)	exon (NM_001034882, exon 1 of 1)	607	NM_001034882	Mm.308666	NM_001034882	ENSMUSG00000075502	Kbtbd6	EG432879|Gm5465|Zbtbd6	kelch repeat and BTB (POZ) domain containing 6	protein-coding	Gm5465	10416655	0.852649	0.199965	12	9	0	4.93579	5.27436	4.96403	5.08335	4.9621	5.12511
52592	chr12-216	chr12	55836490	55836760	+	17.5	0.608	exon (NM_001037756, exon 1 of 10)	exon (NM_001037756, exon 1 of 10)	259	NM_001037756	Mm.24761	NM_027867	ENSMUSG00000012076	Brms1l	0710008O11Rik|AI159718|BRMS1|D12Ertd407e	breast cancer metastasis-suppressor 1-like	protein-coding	Brms1l	10395831	0.852649	0.199965	12	0	0.068257	7.80008	7.88988	7.86086	8.01611	7.88257	7.95679
654470	chr5-455	chr5	122264096	122264366	+	15.3	0.765	exon (NM_001039153, exon 1 of 14)	exon (NM_001039153, exon 1 of 14)	229	NR_104441	Mm.28804	NM_001039153	ENSMUSG00000038593	Tctn1	G730031O11Rik|Tect1	tectonic family member 1	protein-coding	Tctn1	10533446	1	0.469977	24	21	0.0162635	6.11044	6.08701	6.26543	6.09459	6.32422	6.20357
621080	chr8-1166	chr8	36994176	36994446	+	10.2	0.882	exon (NM_001039220, exon 1 of 1)	exon (NM_001039220, exon 1 of 1)	736	NM_001039220	Mm.373292	NM_001039220	ENSMUSG00000074384	AI429214	-	expressed sequence AI429214	protein-coding	AI429214	10571362	1	0.357622	24	23	0.0902339	23.7827	26.2532	23.184	21.6325	21.1057	23.8782
214580	chr7-422	chr7	131371196	131371466	+	13.9	0.571	exon (NM_001039534, exon 1 of 6)	exon (NM_001039534, exon 1 of 6)	185	NM_001039534	Mm.272948	NM_177609	ENSMUSG00000063179	Pstk	5430423O14Rik|5730458D16Rik|Gm1099|R75284	phosphoseryl-tRNA kinase	protein-coding	Pstk	10558220	0.555588	0.0902228	24	12	0	7.8541	7.72212	7.79129	8.0822	7.79709	7.86039
66967	chr1-303	chr1	151755585	151755855	+	18.2	0.681	exon (NM_001039644, exon 1 of 20)	exon (NM_001039644, exon 1 of 20)	346	NM_001311165	Mm.337691	NM_001039644	ENSMUSG00000043019	Edem3	2310050N11Rik	ER degradation enhancer, mannosidase alpha-like 3	protein-coding	Edem3	10350646	0.608446	0.10647	24	6	0.0109107	8.83245	8.77487	8.72591	8.85891	8.75944	8.69534
17776	chr4-918	chr4	116463698	116463968	+	11.7	0.645	exon (NM_001042743, exon 1 of 30)	exon (NM_001042743, exon 1 of 30)	348	NM_008641	Mm.9287	NM_008641	ENSMUSG00000003810	Mast2	MAST205|Mtssk	microtubule associated serine/threonine kinase 2	protein-coding	Mast2	10515295	0.271867	0.0257197	12	10	0.0668357	767.11	730.88	802.958	771.429	693.235	838.263
270076	chr8-963	chr8	84893462	84893732	+	10.9	0.586	exon (NM_001044744, exon 2 of 12)	exon (NM_001044744, exon 2 of 12)	324	NM_008097	Mm.2475	NM_008097	ENSMUSG00000003809	Gcdh	9030411L18|AI266902|D17825|GCD	glutaryl-Coenzyme A dehydrogenase	protein-coding	Gcdh	10580233	0.377948	0.044983	12	11	0.114049	280.162	235.315	290.979	269.367	263.975	258.113
434246	chr7-94	chr7	128004414	128004684	+	20.4	0.62	exon (NM_001079932, exon 1 of 6)	exon (NM_001079932, exon 1 of 6)	171	NM_001079932	Mm.389924	NM_001079932	ENSMUSG00000042828	Trim72	BC067209|MG53	tripartite motif-containing 72	protein-coding	Trim72	10557855	0.555588	0.0902228	24	13	0.0842164	426.024	438.97	415.124	491.205	494.913	435.624
75767	chr8-993	chr8	27174225	27174495	+	10.9	0.63	exon (NM_001080813, exon 1 of 6)	exon (NM_001080813, exon 1 of 6)	286	NM_029423	Mm.205335	NM_029423	ENSMUSG00000031488	Rab11fip1	2010200K21Rik|4833414G05Rik|Rcp	RAB11 family interacting protein 1 (class I)	protein-coding	Rab11fip1	10577954	0.608446	0.10647	12	4	0.0567524	68.2719	65.7692	62.2102	60.25	64.938	56.8773
242860	chr5-278	chr5	20951292	20951562	+	16.8	0.558	exon (NM_001080977, exon 1 of 8)	exon (NM_001080977, exon 1 of 8)	395	NM_001080977	Mm.254286	NM_001080977	ENSMUSG00000039968	Rsbn1l	8430412F05Rik|AI447441|C330002G24Rik	round spermatid basic protein 1-like	protein-coding	Rsbn1l	10528257	1	0.469977	24	5	0.0341957	326.401	366.48	365.009	346.164	352.977	346.923
76137	chr13-39	chr13	43559927	43560197	+	24.1	0.635	exon (NM_001081059, exon 1 of 9)	exon (NM_001081059, exon 1 of 9)	129	NM_001081059	Mm.426290	NM_001081059	ENSMUSG00000021371	Mcur1	6230416A05Rik|AU015498|AV136929|AW554392|C88263|Ccdc90a	mitochondrial calcium uniporter regulator 1	protein-coding	Ccdc90a	10408902	0.418067	0.0538095	12	0	0.0550341	9.01609	9.00914	9.00613	9.16013	8.93291	9.05634
320727	chr6-249	chr6	148831055	148831325	+	16.8	0.562	exon (NM_001081113, exon 1 of 25)	exon (NM_001081113, exon 1 of 25)	277	NM_001081113	Mm.260105	NM_001081113	ENSMUSG00000040029	Ipo8	6230418K12Rik|Abcc10|C130009K11Rik|MRP7|OM-1|Om1|Ranbp8	importin 8	protein-coding	Ipo8	10549447	0.723213	0.146835	12	2	0.11173	265.392	296.11	254.761	289.428	277.355	248.743
17345	chr7-660	chr7	135715987	135716257	+	11.7	0.714	exon (NM_001081117, exon 1 of 14)	exon (NM_001081117, exon 1 of 14)	257	NM_001081117	Mm.4078	NM_001081117	ENSMUSG00000031004	Mki67	D630048A14Rik|Ki-67|Ki67	antigen identified by monoclonal antibody Ki 67	protein-coding	Mki67	10568714	0.723213	0.146835	24	5	0.0914713	48.217	55.5463	49.9482	46.7998	52.1328	44.0818
11733	chr8-444	chr8	22939309	22939579	+	13.9	0.676	exon (NM_001081149, exon 18 of 18)	exon (NM_001081149, exon 18 of 18)	-35392	NM_001110783	Mm.334444	NM_031158	ENSMUSG00000031543	Ank1	Ank-1|nb|pale	ankyrin 1, erythroid	protein-coding	Ank1	10570894	0.66424	0.125235	24	8	0.0323572	8.28786	8.21698	8.27305	8.30159	8.16138	8.22729
320473	chr17-747	chr17	78824474	78824744	+	10.9	0.85	exon (NM_001081179, exon 8 of 36)	exon (NM_001081179, exon 8 of 36)	10772	NM_001081179	Mm.46309	NM_028084	ENSMUSG00000039414	Heatr5b	2010013B10Rik|A230048G03Rik|AV071430|D330050P16Rik|mKIAA1414	HEAT repeat containing 5B	protein-coding	Heatr5b	10452935	0.34014	0.0374712	24	9	0.00522552	4.9293	4.83743	5.20728	4.9297	4.77535	4.77164
320473	chr17-747	chr17	78824474	78824744	+	10.9	0.85	exon (NM_001081179, exon 8 of 36)	exon (NM_001081179, exon 8 of 36)	10772	NM_001081179	Mm.46309	NM_028084	ENSMUSG00000039414	Heatr5b	2010013B10Rik|A230048G03Rik|AV071430|D330050P16Rik|mKIAA1414	HEAT repeat containing 5B	protein-coding	Heatr5b	10452937	1	0.610752	24	9	0.0436921	7.75136	7.91989	7.91655	7.9214	7.78746	7.80966
380664	chr10-444	chr10	120978459	120978729	+	15.3	0.697	exon (NM_001081193, exon 1 of 13)	exon (NM_001081193, exon 1 of 13)	736	NM_001081193	Mm.339371	NM_001081193	ENSMUSG00000048661	Lemd3	AI316861|Man1	LEM domain containing 3	protein-coding	Lemd3	10372815	1	0.998554	24	7	0.0171261	224.357	231.12	239.02	253.76	235.041	233.075
226090	chr19-180	chr19	29648068	29648338	+	16.8	0.585	exon (NM_001081213, exon 1 of 15)	exon (NM_001081213, exon 1 of 15)	217	NM_001081213	Mm.267131	NM_146098	ENSMUSG00000046324	Ermp1	D19Ertd410e|D19Wsu12e|Fxna|mKIAA1815	endoplasmic reticulum metallopeptidase 1	protein-coding	Ermp1	10466947	0.608446	0.10647	24	5	0.020103	8.09286	8.32912	7.9788	8.15891	8.17026	7.95588
232539	chr6-223	chr6	147091523	147091793	+	15.3	0.538	exon (NM_001081237, exon 1 of 3)	exon (NM_001081237, exon 1 of 3)	583	NM_001081237	Mm.491206	NM_001081237	ENSMUSG00000040102	Klhl42	A330079N23Rik|AI450355|C230080I20Rik|Ctb9|Klhdc5|mKIAA1340	kelch-like 42	protein-coding	Klhdc5	10542836	1	0.469977	12	2	0.00683065	6.50263	6.83858	6.53161	6.81489	6.64918	6.56716
102182	chr8-697	chr8	77549508	77549778	+	13.9	0.676	exon (NM_001081240, exon 1 of 12)	exon (NM_001081240, exon 1 of 12)	246	NM_001081240	Mm.197630	NM_178903	ENSMUSG00000037134	Prmt9	AI931714|Prmt10	protein arginine methyltransferase 9	protein-coding	Prmt10	10572962	1	1	20	10.8333	0	7.36558	7.36201	7.50433	7.53491	7.49192	7.47718
100125339	chr1-207	chr1	191025505	191025775	+	18.2	0.586	exon (NM_001081259, exon 1 of 10)	exon (NM_001081259, exon 1 of 10)	289	NR_027298	Mm.472263	NR_027298	ENSMUSG00000097845	A230020J21Rik	ENSMUSG00000066596	RIKEN cDNA A230020J21 gene	ncRNA	A230020J21Rik	10352703	1	1	20	5.83333	0.00612983	6.21008	6.2015	6.09756	6.12545	6.1988	5.76549
545527	chr3-462	chr3	58636626	58636896	+	11.7	0.667	exon (NM_001081262, exon 1 of 14)	exon (NM_001081262, exon 1 of 14)	446	NM_001081262	Mm.357722	NM_001081262	ENSMUSG00000070471	Erich6	4932431H17Rik|Fam194a	glutamate rich 6	protein-coding	Fam194a	10498323	0.786454	0.171619	12	8	0.034825	4.37154	4.28931	4.39797	4.35622	4.46034	4.22694
243510	chr6-133	chr6	83101779	83102049	+	20.4	0.667	exon (NM_001081266, exon 1 of 9)	exon (NM_001081266, exon 1 of 9)	398	NM_001081266	Mm.436553	NM_001081266	ENSMUSG00000079511	Ccdc142	A230058J24Rik	coiled-coil domain containing 142	protein-coding	Ccdc142	10539321	0.922182	0.232281	24	9	0.00473761	169.648	163.161	161.7	169.663	168.877	155.305
100038657	chr1-1107	chr1	162697970	162698240	+	10.9	0.68	exon (NM_001081290, exon 19 of 35)	exon (NM_001081290, exon 19 of 35)	-39886	NM_001177581	Mm.416999	NM_001177581	ENSMUSG00000091060	7420461P10Rik	ENSMUSG00000073516	RIKEN cDNA 7420461P10 gene	protein-coding	7420461P10Rik	10359520	0.460888	0.0641441	24	18	0.0642689	43.4101	33.5407	34.6679	35.2553	38.1235	37.3348
329251	chr1-269	chr1	134955612	134955882	+	16.8	0.611	exon (NM_001081307, exon 1 of 24)	exon (NM_001081307, exon 1 of 24)	193	NM_001081307	Mm.188709	NM_001081307	ENSMUSG00000073557	Ppp1r12b	1810037O03Rik|9530009M10Rik|AI132431|Mypt2	protein phosphatase 1, regulatory (inhibitor) subunit 12B	protein-coding	Ppp1r12b	10357932	0.723213	0.146835	12	10	0.110655	618.869	531.369	645.118	624.678	586.904	651.219
78923	chr18-376	chr18	59176172	59176442	+	10.2	0.773	exon (NM_001081328, exon 1 of 3)	exon (NM_001081328, exon 1 of 3)	967	NM_001081328	Mm.84007	NM_001081328	ENSMUSG00000058152	Chsy3	4833446K15Rik|AI662215	chondroitin sulfate synthase 3	protein-coding	Chsy3	10455948	1	0.785093	24	15	0.0430274	67.7064	63.5368	67.5962	69.8743	67.4343	61.2259
545085	chr15-296	chr15	8098874	8099144	+	15.3	0.719	exon (NM_001081402, exon 2 of 18)	exon (NM_001081402, exon 2 of 18)	200	NM_001081402	Mm.321312	NM_198413	ENSMUSG00000039828	Wdr70	4833422F06Rik	WD repeat domain 70	protein-coding	Wdr70	10427521	0.922182	0.232281	24	15	0.0944412	8.41406	8.31613	8.38287	8.58373	8.47936	8.47591
69706	chr12-237	chr12	69168849	69169119	+	15.3	0.639	exon (NM_001081406, exon 1 of 4)	exon (NM_001081406, exon 1 of 4)	170	NM_001081406	Mm.28847	NM_027178	ENSMUSG00000034883	Lrr1	2410005L11Rik|AU021780|LRR-1|Ppil5	leucine rich repeat protein 1	protein-coding	Lrr1	10396068	1	0.610752	24	17	0.0224931	4.62295	4.69717	4.64169	4.62301	4.81772	4.72773
66631	chr13-573	chr13	65112470	65112740	+	9.48	0.667	exon (NM_001083901, exon 2 of 13)	exon (NM_001083901, exon 2 of 13)	377	NM_001083901	Mm.239196	NM_133680	ENSMUSG00000038212	Mfsd14b	5730414C17Rik|AU045608|AW539692|Hiatl1	major facilitator superfamily domain containing 14B	protein-coding	Hiatl1	10410173	1	0.693388	24	11	0.043942	6.77367	7.15524	7.09056	7.1347	7.05177	7.08073
99371	chr2-361	chr2	166805697	166805967	+	15.3	0.737	exon (NM_001085495, exon 1 of 39)	exon (NM_001085495, exon 1 of 39)	251	NM_001085495	Mm.297192	NM_001085495	ENSMUSG00000074582	Arfgef2	AI463430|AW493672|BIG2|E230011G24Rik	ADP-ribosylation factor guanine nucleotide-exchange factor 2 (brefeldin A-inhibited)	protein-coding	Arfgef2	10478754	0.608446	0.10647	12	5.5	0.0786621	359.481	335.686	376.804	379.485	328.127	358.026
72504	chr18-151	chr18	14783539	14783809	+	16	0.61	exon (NM_001100449, exon 1 of 15)	exon (NM_001100449, exon 1 of 15)	429	NM_001100449	Mm.312233	NM_001100449	ENSMUSG00000054321	Taf4b	105kDa|2610524B04Rik|4932409F03Rik|AW987595|TAFII-105|TAFII105|Taf2c2	TATA-box binding protein associated factor 4b	protein-coding	Taf4b	10454077	0.271867	0.0257197	24	14	0.0552604	117.139	102.805	111.22	145.064	117.241	117.124
381823	chr6-444	chr6	134983699	134983969	+	13.9	0.667	exon (NM_001109914, exon 2 of 2)	exon (NM_001109914, exon 2 of 2)	1833	NM_001109914	Mm.296104	NM_001109914	ENSMUSG00000090698	Apold1	Gm1075	apolipoprotein L domain containing 1	protein-coding	Apold1	10542319	0.608446	0.10647	24	14	0.137412	141.764	111.674	137.118	176.221	134.112	119.838
69666	chr13-466	chr13	34162957	34163227	+	11.7	0.581	exon (NM_001110515, exon 1 of 2)	exon (NM_001110515, exon 1 of 2)	128	NM_001110515	Mm.24788	NM_001101430	ENSMUSG00000071451	Psmg4	PAC-4|mPAC4	proteasome (prosome, macropain) assembly chaperone 4	protein-coding	Psmg4	10404531	1	1	20	7.83333	0.00291642	6.38856	6.38459	6.39137	6.52687	6.35237	6.52148
17342	chr6-405	chr6	97807051	97807321	+	13.9	0.625	exon (NM_001113198, exon 1 of 10)	exon (NM_001113198, exon 1 of 10)	128	NM_001113198	Mm.333284	NM_008601	ENSMUSG00000035158	Mitf	BCC2|Bhlhe32|Gsfbcc2|Vitiligo|Wh|bw|mi|vit	microphthalmia-associated transcription factor	protein-coding	Mitf	10540248	0.242857	0.0211898	24	4.5	0.0508975	8.41459	8.42941	8.40234	8.39594	8.20269	8.30024
17342	chr6-405	chr6	97807051	97807321	+	13.9	0.625	exon (NM_001113198, exon 1 of 10)	exon (NM_001113198, exon 1 of 10)	128	NM_001113198	Mm.333284	NM_008601	ENSMUSG00000035158	Mitf	BCC2|Bhlhe32|Gsfbcc2|Vitiligo|Wh|bw|mi|vit	microphthalmia-associated transcription factor	protein-coding	Mitf	10540265	1	1	20	8.83333	0.0142113	3.6085	3.58181	3.57102	3.77551	3.69407	3.59815
210035	chr10-719	chr10	127677090	127677360	+	10.2	0.643	exon (NM_001113211, exon 1 of 9)	exon (NM_001113211, exon 1 of 9)	160	NM_001113211	Mm.251075	NM_173732	ENSMUSG00000040195	Nemp1	Tmem194|Tmem194a	nuclear envelope integral membrane protein 1	protein-coding	Tmem194	10366983	0.723213	0.146835	24	14.5	0.0366988	6.39312	6.41992	6.50433	6.45398	6.57417	6.59584
68512	chr4-812	chr4	45107828	45108098	+	13.1	0.556	exon (NM_001134646, exon 1 of 3)	exon (NM_001134646, exon 1 of 3)	150	NM_001099675	Mm.282081	NM_001099675	ENSMUSG00000078713	Tomm5	1110019J04Rik|Tom5	translocase of outer mitochondrial membrane 5 homolog (yeast)	protein-coding	Tomm5	10512701	0.460888	0.0641441	12	1	0.133983	275.319	266.535	247.28	314.115	264.16	245.526
232784	chr6-480	chr6	47920599	47920869	+	12.4	0.7	exon (NM_001145881, exon 1 of 5)	exon (NM_001145881, exon 1 of 5)	166	NM_145576	Mm.196782	NM_145576	ENSMUSG00000052763	Zfp212	Znf212|mKIAA3011	Zinc finger protein 212	protein-coding	Zfp212	10537934	1	1	20	6.16667	0.0139025	82.9396	89.3849	74.9782	82.3519	81.4019	87.412
212862	chr10-485	chr10	88503469	88503739	+	12.4	0.725	exon (NM_001146690, exon 1 of 9)	exon (NM_001146690, exon 1 of 9)	366	NR_027477	Mm.288897	NM_144807	ENSMUSG00000060002	Chpt1	-	choline phosphotransferase 1	protein-coding	Chpt1	10371616	0.555588	0.0902228	12	2	0.0124451	10.621	10.7174	10.6845	10.7428	10.7092	10.607
19317	chr17-1220	chr17	10216126	10216396	+	7.29	0.8	exon (NM_001159517, exon 6 of 8)	exon (NM_001159517, exon 6 of 8)	103100	NM_001159517	Mm.130694	NM_021881	ENSMUSG00000062078	Qk	1110003F05Rik|1500005P18|QkI|l(17)-1Wis|l17Wis1	quaking	protein-coding	Qk	10447708	0.555588	0.0902228	12	0	0.0165463	11.1102	11.1784	11.3448	11.4116	11.1625	11.2077
19317	chr17-1220	chr17	10216126	10216396	+	7.29	0.8	exon (NM_001159517, exon 6 of 8)	exon (NM_001159517, exon 6 of 8)	103100	NM_001159517	Mm.130694	NM_021881	ENSMUSG00000062078	Qk	1110003F05Rik|1500005P18|QkI|l(17)-1Wis|l17Wis1	quaking	protein-coding	Qk	10447725	1	1	20	13.1667	0.0574579	7.83004	7.27662	7.63224	7.48765	7.52065	7.47045
19317	chr17-1220	chr17	10216126	10216396	+	7.29	0.8	exon (NM_001159517, exon 6 of 8)	exon (NM_001159517, exon 6 of 8)	103100	NM_001159517	Mm.130694	NM_021881	ENSMUSG00000062078	Qk	1110003F05Rik|1500005P18|QkI|l(17)-1Wis|l17Wis1	quaking	protein-coding	Qk	10447729	1	1	20	14.5	0.0477894	7.05075	6.60721	6.82513	6.70515	6.64398	6.66892
21399	chr1-1119	chr1	4858363	4858633	+	8.75	0.571	exon (NM_001159751, exon 1 of 10)	exon (NM_001159751, exon 1 of 10)	170	NM_001159751	Mm.207263	NM_011541	ENSMUSG00000033813	Tcea1	S-II	transcription elongation factor A (SII) 1	protein-coding	Tcea1	10426301	0.786454	0.171619	12	2	0.0242325	9.51381	9.46611	9.45663	9.60044	9.52535	9.42583
21399	chr1-1119	chr1	4858363	4858633	+	8.75	0.571	exon (NM_001159751, exon 1 of 10)	exon (NM_001159751, exon 1 of 10)	170	NM_001159751	Mm.207263	NM_011541	ENSMUSG00000033813	Tcea1	S-II	transcription elongation factor A (SII) 1	protein-coding	Tcea1	10344633	1	1	20	5.83333	0	9.07656	9.02197	9.01884	8.9682	9.04023	8.99338
56812	chr1-140	chr1	75236763	75237033	+	21.9	0.696	exon (NM_001159883, exon 2 of 9)	exon (NM_001159883, exon 2 of 9)	196	NM_001159885	Mm.489660	NM_020266	ENSMUSG00000026203	Dnajb2	2700059H22Rik|Dnajb10|Hsj1|mDj8	DnaJ heat shock protein family (Hsp40) member B2	protein-coding	Dnajb2	10347564	0.215927	0.0173912	12	10	0.114601	8.2463	7.98947	8.26357	8.29471	8.07729	8.18711
240892	chr1-696	chr1	166127002	166127272	+	13.1	0.69	exon (NM_001160049, exon 2 of 6)	exon (NM_001160049, exon 2 of 6)	761	NM_001033344	Mm.35315	NM_001033344	ENSMUSG00000026564	Dusp27	C130085G02Rik|Gm209	dual specificity phosphatase 27 (putative)	protein-coding	Dusp27	10359793	0.377948	0.044983	12	0	0.201243	312.041	256.176	273.476	324.148	284.519	304.081
107197	chr19-387	chr19	8880454	8880724	+	13.1	0.541	exon (NM_001160356, exon 2 of 2)	exon (NM_001160356, exon 2 of 2)	344	NM_001160356	Mm.381181	NM_001160356	ENSMUSG00000071654	Uqcc3	AI462493|Cbp4	ubiquinol-cytochrome c reductase complex assembly factor 3	protein-coding	AI462493	10465826	0.922182	0.232281	24	10	0.015224	7.29581	7.30075	7.47466	7.32961	7.31203	7.34214
109267	chr5-72	chr5	135962865	135963135	+	24.1	0.707	exon (NM_001160366, exon 9 of 11)	exon (NM_001160366, exon 9 of 11)	11476	NM_001160366	Mm.332750	NM_001160366	ENSMUSG00000029699	Ssc4d	C330016E03Rik|S4D-SRCRB|SRCRB-S4D|Srcrb4d	scavenger receptor cysteine rich family, 4 domains	protein-coding	Srcrb4d	10534537	0.271867	0.0257197	12	8	0.107254	6.78138	6.50503	6.65671	6.53602	6.61959	6.73638
12879	chr12-350	chr12	24680534	24680804	+	13.1	0.583	exon (NM_001161807, exon 1 of 5)	exon (NM_001161807, exon 1 of 5)	1126	NM_138686	Mm.52265	NM_138686	ENSMUSG00000062563	Cys1	2900006B19Rik|AV218859|Ccap|ck|cpk	cystin 1	protein-coding	Cys1	10399680	0.0220008	0.000536109	24	18	0.129047	60.6868	40.6561	51.2887	53.215	58.205	57.2832
72123	chr12-260	chr12	32379195	32379465	+	15.3	0.628	exon (NM_001162903, exon 1 of 1)	exon (NM_001162903, exon 1 of 1)	541	NM_001162903	Mm.341352	NM_028111	ENSMUSG00000090946	Ccdc71l	2010109K11Rik|AV375874	coiled-coil domain containing 71 like	protein-coding	2010109K11Rik	10395252	1	1	20	5.83333	0.0112799	6.29386	6.39995	6.34818	6.38877	6.39802	6.34203
109050	chr3-47	chr3	105716397	105716667	+	24.8	0.818	exon (NM_001163356, exon 2 of 2)	exon (NM_001163356, exon 2 of 2)	11074	NM_001163356	Mm.212591	NM_175398	ENSMUSG00000048458	Fam212b	6530418L21Rik|inka2	family with sequence similarity 212, member B	protein-coding	6530418L21Rik	10495094	1	1	20	11.1667	0.0174105	6.07965	5.5663	5.67281	5.87606	5.64289	5.66848
381820	chr6-169	chr6	133105335	133105605	+	19	0.545	exon (NM_001163445, exon 1 of 1)	exon (NM_001163445, exon 1 of 1)	231	NM_001271583	Mm.291762	NM_001163445	ENSMUSG00000072704	Smim10l1	2700089E24Rik|AI662692	small integral membrane protein 10 like 1	protein-coding	2700089E24Rik	10542264	0.66424	0.125235	12	1	0.0390323	10.2657	10.1862	10.2148	10.1846	10.2181	10.179
69270	chr2-749	chr2	150909607	150909877	+	13.1	0.8	exon (NM_001163476, exon 1 of 5)	exon (NM_001163476, exon 1 of 5)	148	NM_001163476	Mm.271603	NM_027014	ENSMUSG00000027454	Gins1	2810418N01Rik|Gins4|PSF1|mKIAA0186	GINS complex subunit 1 (Psf1 homolog)	protein-coding	Gins1	10476989	1	1	20	12.1667	0.0404214	4.77076	4.53539	4.69003	4.57951	4.80146	4.69726
56016	chr10-753	chr10	18526297	18526567	+	11.7	0.833	exon (NM_001163592, exon 6 of 8)	exon (NM_001163592, exon 6 of 8)	19644	NM_019487	Mm.35551	NM_019487	ENSMUSG00000019853	Hebp2	SOUL	heme binding protein 2	protein-coding	Hebp2	10368092	1	1	20	9.83333	0.00871077	76.6062	61.7857	71.2728	67.6262	72.7129	53.7283
73390	chr10-1124	chr10	56115289	56115559	+	10.2	0.636	exon (NM_001163833, exon 2 of 2)	exon (NM_001163833, exon 2 of 2)	8507	NM_001163833	Mm.181475	NM_133751	ENSMUSG00000047669	Msl3l2	1700060H10Rik	male-specific lethal 3-like 2 (Drosophila)	protein-coding	Msl3l2	10363170	1	1	20	9.16667	0.001404	5.4244	5.299	5.42324	5.25613	5.38817	5.41727
77038	chr2-50	chr2	91269892	91270162	+	26.2	0.648	exon (NM_001166024, exon 10 of 17)	exon (NM_001166024, exon 10 of 17)	4912	NM_001166024	Mm.43636	NM_023854	ENSMUSG00000027255	Arfgap2	2310032E02Rik|Zfp289	ADP-ribosylation factor GTPase activating protein 2	protein-coding	Arfgap2	10473874	1	1	20	13.1667	0.043982	11.03	10.8716	10.8926	10.8188	10.9994	11.0299
74002	chr18-211	chr18	36018269	36018539	+	13.9	0.714	exon (NM_001167891, exon 10 of 10)	exon (NM_001167891, exon 10 of 10)	53574	NR_110349	Mm.196944	NM_028707	ENSMUSG00000024347	Psd2	6330404E20Rik|AW125584|EFA6C	pleckstrin and Sec7 domain containing 2	protein-coding	Psd2	10454856	1	1	20	11.1667	0	5.42634	5.3805	5.27972	5.42219	5.34385	5.36239
72103	chr6-570	chr6	87671795	87672065	+	11.7	0.64	exon (NM_001170489, exon 1 of 11)	exon (NM_001170489, exon 1 of 11)	238	NM_001170489	Mm.31770	NM_024251	ENSMUSG00000030051	Aplf	2010301N04Rik|AI452191	aprataxin and PNKP like factor	protein-coding	Aplf	10546031	1	1	20	6.83333	0	5.256	5.20109	5.319	5.31762	5.15629	5.28573
270685	chr10-402	chr10	3973242	3973512	+	13.9	0.5	exon (NM_001170785, exon 1 of 28)	exon (NM_001170785, exon 1 of 28)	302	NM_172308	Mm.184752	NM_172308	ENSMUSG00000040675	Mthfd1l	2410004L15Rik|AI647056|Fthfsdc1	methylenetetrahydrofolate dehydrogenase (NADP+ dependent) 1-like	protein-coding	Mthfd1l	10367641	0.66424	0.125235	24	20.5	0.068752	84.3637	73.6927	72.5518	67.6084	83.3194	85.5751
28105	chr18-631	chr18	46198401	46198671	+	8.75	0.682	exon (NM_001170855, exon 1 of 10)	exon (NM_001170855, exon 1 of 10)	282	NM_001170855	Mm.277382	NM_178872	ENSMUSG00000033949	Trim36	D18Wsu100e|haprin	tripartite motif-containing 36	protein-coding	Trim36	10458767	1	1	20	9.83333	0.00943202	4.34724	4.23643	4.27745	4.25487	4.28937	4.23054
68857	chr18-74	chr18	49755331	49755601	+	20.4	0.653	exon (NM_001170960, exon 1 of 4)	exon (NM_001170960, exon 1 of 4)	135	NM_001170960	Mm.96010	NM_026854	ENSMUSG00000024505	Dtwd2	1190002H09Rik|8030470C17Rik|AI414673|BB115449	DTW domain containing 2	protein-coding	Dtwd2	10458875	0.460888	0.0641441	24	11	0.10642	6.50123	6.69355	6.82816	6.81939	6.85292	6.6064
216440	chr10-199	chr10	127120858	127121128	+	17.5	0.6	exon (NM_001171026, exon 1 of 15)	exon (NM_001171026, exon 1 of 15)	167	NM_001171026	Mm.295246	NM_177614	ENSMUSG00000040462	Os9	4632413K17Rik|AU022351	amplified in osteosarcoma	protein-coding	Os9	10373036	0.786454	0.171619	12	1	0.0646225	7.54788	7.6664	7.42965	7.57311	7.36481	7.31953
208194	chr9-404	chr9	119444975	119445245	+	13.9	0.522	exon (NM_001172136, exon 1 of 7)	exon (NM_001172136, exon 1 of 7)	187	NM_172456	Mm.101578	NM_172456	ENSMUSG00000042787	Exog	AW557704|ENGL-B|ENGL-a|Endogl1|Endogl2|Engl|Engla|Englb	endo/exonuclease (5'-3'), endonuclease G-like	protein-coding	Exog	10590182	1	0.610752	24	4	0	39.1318	34.7093	39.1286	38.4089	36.1632	37.4917
67848	chr5-266	chr5	124552861	124553131	+	16	0.667	exon (NM_001190795, exon 1 of 14)	exon (NM_001190795, exon 1 of 14)	132	NM_001190795	Mm.281601	NM_026409	ENSMUSG00000029389	Ddx55	2810021H22Rik|mKIAA1595	DEAD (Asp-Glu-Ala-Asp) box polypeptide 55	protein-coding	Ddx55	10525751	1	1	20	8.5	0.0192019	6.35458	6.21704	6.39532	6.46455	6.35777	6.31886
64945	chr5-1079	chr5	5507888	5508158	+	8.75	0.696	exon (NM_001193660, exon 5 of 5)	exon (NM_001193660, exon 5 of 5)	6766	NM_001193660	Mm.40132	NM_022890	ENSMUSG00000046798	Cldn12	-	claudin 12	protein-coding	Cldn12	10527965	0.0712878	0.00309146	24	17	0.205775	8.05557	7.76301	8.01014	8.00649	8.22767	8.28986
225027	chr17-202	chr17	80207040	80207310	+	18.2	0.574	exon (NM_001195487, exon 1 of 7)	exon (NM_001195487, exon 1 of 7)	130	NM_001195486	Mm.292016	NM_146083	ENSMUSG00000024097	Srsf7	35kDa|9430065L19Rik|9G8|NX-96|Sfrs7	serine/arginine-rich splicing factor 7	protein-coding	Srsf7	10453102	1	1	20	8.83333	0.0122667	8.08991	8.21844	8.17567	8.41414	8.20845	8.27398
69709	chr12-127	chr12	4234007	4234277	+	17.5	0.525	exon (NM_001204912, exon 1 of 2)	exon (NM_001204912, exon 1 of 2)	115	NM_001204912	Mm.250552	NM_001204912	ENSMUSG00000096199	Ptrhd1	2410017P09Rik	peptidyl-tRNA hydrolase domain containing 1	protein-coding	2410017P09Rik	10394286	1	1	20	7.83333	0.0580637	6.96822	6.65217	6.71778	6.75726	6.89781	6.64934
69709	chr12-127	chr12	4234007	4234277	+	17.5	0.525	exon (NM_001204912, exon 1 of 2)	exon (NM_001204912, exon 1 of 2)	115	NM_001204912	Mm.250552	NM_001204912	ENSMUSG00000096199	Ptrhd1	2410017P09Rik	peptidyl-tRNA hydrolase domain containing 1	protein-coding	2410017P09Rik	10394283	1	1	20	10.1667	0.0202201	6.90745	6.83185	6.86872	7.09684	6.91709	6.91617
435391	chr14-416	chr14	21669641	21669911	+	12.4	0.72	exon (NM_001205241, exon 17 of 17)	exon (NM_001205241, exon 17 of 17)	44800	NM_001013826	Mm.295860	NM_001013826	ENSMUSG00000063821	Dupd1	EG435391	dual specificity phosphatase and pro isomerase domain containing 1	protein-coding	Dupd1	10418011	1	1	20	11.8333	0.0126871	197.94	154.495	176.329	174.437	168.61	171.864
12835	chr1-32	chr1	90775832	90776102	+	32.8	0.735	exon (NM_001243009, exon 37 of 41)	exon (NM_001243009, exon 37 of 41)	68004	NM_001243009	Mm.7562	NM_009935	ENSMUSG00000048126	Col6a3	AI507288|Col6a-3	collagen, type VI, alpha 3	protein-coding	Col6a3	10356520	0.852649	0.199965	24	7.5	0.174033	8.12043	8.34218	8.29399	8.31961	8.06242	7.81228
67767	chr6-178	chr6	113442649	113442919	+	17.5	0.763	exon (NM_001243739, exon 1 of 2)	exon (NM_001243739, exon 1 of 2)	215	NM_026365	Mm.2053	NM_026365	ENSMUSG00000051256	Jagn1	5830427H10Rik	jagunal homolog 1	protein-coding	Jagn1	10540676	0.994691	0.269008	24	14	0.0865428	392.052	398.065	429.543	416.95	426.763	427.097
72831	chr9-369	chr9	110100777	110101047	+	15.3	0.595	exon (NM_001252683, exon 1 of 19)	exon (NM_001252683, exon 1 of 19)	175	NM_001252683	Mm.276305	NM_133347	ENSMUSG00000032480	Dhx30	2810477H02Rik|C130058C04Rik|Ddx30|HELG|Ret-CoR	DEAH (Asp-Glu-Ala-His) box polypeptide 30	protein-coding	Dhx30	10597103	1	0.357622	12	1	0.0711137	7.01328	6.9651	6.91271	6.98119	6.94402	6.95619
100504183	chr11-1027	chr11	99985867	99986137	+	12.4	0.677	exon (NM_001256057, exon 1 of 1)	exon (NM_001256057, exon 1 of 1)	591	NM_001256057	Mm.426560	NM_001256057	ENSMUSG00000078253	Krtap16-1	Gm11570|OTTMUSG00000002209	keratin associated protein 16-1	protein-coding	Krtap16-1	10440681	0.723213	0.146835	12	7	0.208575	23.5653	28.0667	28.9616	26.1075	71.5356	32.4564
142688	chr13-174	chr13	3634018	3634288	+	16	0.609	exon (NM_001267724, exon 1 of 4)	exon (NM_001267724, exon 1 of 4)	121	NM_001267724	Mm.253061	NM_178283	ENSMUSG00000033781	Asb13	2210015B19Rik|6430573K02Rik|Asb-13|C85285	ankyrin repeat and SOCS box-containing 13	protein-coding	Asb13	10403273	1	0.469977	24	14	0.0228113	9.25856	9.01236	9.15643	9.18779	9.17104	9.21686
216792	chr11-4	chr11	59161470	59161740	+	77.3	0.827	exon (NM_001270791, exon 2 of 2)	exon (NM_001270791, exon 2 of 2)	2140	NM_001270791	Mm.266175	NM_173785	ENSMUSG00000049287	Iba57	4930543L23Rik|A230051G13Rik|C1orf69	IBA57 homolog, iron-sulfur cluster assembly	protein-coding	A230051G13Rik	10386344	0.919488	0.216123	24	14	0.0294086	6.13991	5.76388	6.01733	5.98972	5.99	5.88167
16169	chr2-536	chr2	11705725	11705995	+	15.3	0.833	exon (NM_001271500, exon 1 of 6)	exon (NM_001271500, exon 1 of 6)	148	NM_001271500	Mm.200196	NM_008358	ENSMUSG00000023206	Il15ra	AA690181|IL-15RA	interleukin 15 receptor, alpha chain	protein-coding	Il15ra	10469289	1	0.357622	24	21.5	0.0331562	8.0926	8.1199	7.95332	8.07064	8.02294	8.11753
12390	chr6-324	chr6	17281316	17281586	+	13.9	0.684	exon (NM_001277756, exon 1 of 2)	exon (NM_001277756, exon 1 of 2)	266	NM_001277756	Mm.396075	NM_016900	ENSMUSG00000000058	Cav2	AI447843	caveolin 2	protein-coding	Cav2	10536494	0.418067	0.0538095	24	7	0.245472	8.0418	8.51519	8.358	8.49181	8.14008	7.97632
269536	chr4-189	chr4	48415934	48416204	+	17.5	0.8	exon (NM_001281978, exon 15 of 19)	exon (NM_001281978, exon 15 of 19)	57353	NM_172304	Mm.272025	NM_172304	ENSMUSG00000028345	Tex10	2610206N19Rik|2810462N03Rik|BC006867	testis expressed gene 10	protein-coding	Tex10	10512867	1	1	20	11.8333	0.0287895	313.869	295.397	319.475	308.747	317.687	345.869
19651	chr8-343	chr8	91070166	91070436	+	17.5	0.64	exon (NM_001282001, exon 1 of 22)	exon (NM_001282001, exon 1 of 22)	244	NM_011250	Mm.235580	NM_011250	ENSMUSG00000031666	Rbl2	PRB2|RBR-2|Rb2|p130	retinoblastoma-like 2	protein-coding	Rbl2	10573867	0.190788	0.0142182	12	1	0.00453255	456.772	461.709	447.279	459.576	449.358	443.116
212880	chr13-96	chr13	55635055	55635325	+	18.2	0.833	exon (NM_001282055, exon 1 of 23)	exon (NM_001282055, exon 1 of 23)	191	NM_001282055	Mm.202725	NM_145975	ENSMUSG00000021500	Ddx46	2200005K02Rik|8430438J23Rik|AI325430|AI957095|mKIAA0801	DEAD (Asp-Glu-Ala-Asp) box polypeptide 46	protein-coding	Ddx46	10405511	1	0.886572	12	1	0.0482954	8.50521	8.49918	8.51721	8.63557	8.64151	8.64272
17168	chr11-963	chr11	32267296	32267566	+	12.4	0.677	exon (NM_001284359, exon 1 of 14)	exon (NM_001284359, exon 1 of 14)	276	NR_104306	Mm.263161	NM_181569	ENSMUSG00000020289	Nprl3	Aag|CGTHBA|HS-26|HS-40|Mare|Phg|Prox1|m(alpha)RE	nitrogen permease regulator-like 3	protein-coding	Nprl3	10385004	1	1	20	10.5	0.0556831	8.36492	8.25027	8.17556	8.20115	8.17913	8.30753
18391	chr4-111	chr4	41740766	41741036	+	19.7	0.68	exon (NM_001286551, exon 2 of 4)	exon (NM_001286551, exon 2 of 4)	458	NM_001286605	Mm.425181	NM_011014	ENSMUSG00000036078	Sigmar1	Oprs1|Sig1R|sigma1R	sigma non-opioid intracellular receptor 1	protein-coding	Sigmar1	10512308	1	1	20	8.5	0.0483103	8.08024	8.36966	8.25497	8.31413	8.1689	8.25506
338363	chr18-125	chr18	12121293	12121563	+	18.2	0.756	exon (NM_001289666, exon 1 of 15)	exon (NM_001289666, exon 1 of 15)	109	NM_001289667	Mm.271567	NM_178801	ENSMUSG00000049411	Tmem241	6030446N20Rik	transmembrane protein 241	protein-coding	6030446N20Rik	10457489	1	1	20	9.83333	0.0329402	6.55532	6.68893	6.78153	6.48707	6.60226	6.67331
214597	chr9-314	chr9	45954761	45955031	+	20.4	0.66	exon (NM_001289668, exon 1 of 27)	exon (NM_001289668, exon 1 of 27)	353	NM_172257	Mm.379345	NM_172257	ENSMUSG00000034908	Sidt2	B930096O19|BC023957|CGI-40	SID1 transmembrane family, member 2	protein-coding	Sidt2	10593130	1	1	20	7.83333	0.0101768	647.273	676.985	640.138	652.019	649.313	605.134
270627	chrX-116	chrX	101532733	101533003	+	9.48	0.65	exon (NM_001290729, exon 1 of 39)	exon (NM_001290729, exon 1 of 39)	133	NM_001290729	Mm.261750	NM_001081008	ENSMUSG00000031314	Taf1	AU015687|B430306D02Rik|Ccg-1|Ccg1|KAT4|N-TAF1|TAFII250|Taf2a|p250	TATA-box binding protein associated factor 1	protein-coding	Taf1	10601192	0.994691	0.269008	12	1	0.0297126	7.14724	7.33713	7.33139	7.41596	7.2611	7.40627
237860	chr11-997	chr11	77348321	77348591	+	12.4	0.526	exon (NM_001291190, exon 1 of 14)	exon (NM_001291190, exon 1 of 14)	176	NM_001291190	Mm.440381	NM_177710	ENSMUSG00000037926	Ssh2	SSH-2|SSH-2L|mSSH-2L	slingshot homolog 2 (Drosophila)	protein-coding	Ssh2	10378833	0.723213	0.146835	24	7.5	0.127746	9.74819	9.84216	9.92451	9.94118	9.76052	9.7134
67669	chr7-628	chr7	89940857	89941127	+	12.4	0.667	exon (NM_001291286, exon 1 of 5)	exon (NM_001291286, exon 1 of 5)	212	NR_111916	Mm.28679	NM_026304	ENSMUSG00000062797	Hikeshi	0610007P06Rik|1110002N09Rik|l(7)6Rn|l7Rn6	heat shock protein nuclear import factor	protein-coding	l7Rn6	10565479	1	0.998554	24	10	0	10.6715	10.6627	10.6269	10.7487	10.6895	10.6671
16709	chr14-654	chr14	47664096	47664366	+	8.75	0.765	exon (NM_001293635, exon 2 of 41)	exon (NM_001293635, exon 2 of 41)	475	NM_008477	Mm.3110	NM_008477	ENSMUSG00000021843	Ktn1	-	kinectin 1	protein-coding	Ktn1	10414374	1	0.357622	12	1	0.161277	800.002	729.973	753.394	817.843	775.848	748.563
17527	chr5-376	chr5	31153557	31153827	+	16	0.73	exon (NM_001294322, exon 2 of 7)	exon (NM_001294322, exon 2 of 7)	488	NM_001310527	Mm.271923	NM_008622	ENSMUSG00000107283	Mpv17	Tg.Mpv17	MpV17 mitochondrial inner membrane protein	protein-coding	Mpv17	10529082	0.723213	0.146835	24	13	0.0912875	8.65699	8.7084	8.84447	8.8868	8.80424	8.803
19358	chr8-285	chr8	84840423	84840693	+	19	0.583	exon (NM_001297607, exon 1 of 9)	exon (NM_001297607, exon 1 of 9)	107	NM_001297607	Mm.255539	NM_009010	ENSMUSG00000003813	Rad23a	2310040P19Rik|AL024030|HR23A|mHR23A	RAD23 homolog A, nucleotide excision repair protein	protein-coding	Rad23a	10580210	1	1	20	12.8333	0.0296576	9.77737	9.55725	9.67686	9.58699	9.71976	9.71226
14388	chr8-116	chr8	80879468	80879738	+	23.3	0.627	exon (NM_001301298, exon 1 of 11)	exon (NM_001301298, exon 1 of 11)	876	NM_021356	Mm.277409	NM_021356	ENSMUSG00000031714	Gab1	AA408973|AW107238	growth factor receptor bound protein 2-associated protein 1	protein-coding	Gab1	10579925	0.0833197	0.00389482	24	17	0.0235113	464.962	439.811	462.372	497.309	470.881	472.457
72029	chr17-247	chr17	46751940	46752210	+	16.8	0.554	exon (NM_001305988, exon 1 of 5)	exon (NM_001305988, exon 1 of 5)	139	NM_028065	Mm.240325	NM_028065	ENSMUSG00000023973	Cnpy3	1600025D17Rik|2410050O22Rik|AI413153|CAG4A|ERDA5|PRAT4A|Tnrc5	canopy FGF signaling regulator 3	protein-coding	Cnpy3	10451458	1	1	20	13.5	0.00743091	198.948	174.071	189.633	187.906	183.902	175.652
381633	chr5-890	chr5	33983654	33983924	+	11.7	0.767	exon (NM_001310547, exon 2 of 4)	exon (NM_001310547, exon 2 of 4)	356	NM_001310547	Mm.4923	NM_001033458	ENSMUSG00000070858	Gm1673	-	predicted gene 1673	protein-coding	Gm1673	10521163	1	1	20	13.8333	0.00168449	5.8922	5.78467	5.85204	5.7496	5.85286	5.78466
231279	chr5-248	chr5	69556932	69557202	+	19	0.571	exon (NM_001310631, exon 1 of 15)	exon (NM_001310631, exon 1 of 15)	143	NM_001310631	Mm.21105	NM_172711	ENSMUSG00000029208	Guf1	4631409J12|AA407526|EF-4	GUF1 homolog, GTPase	protein-coding	Guf1	10522303	1	0.693388	12	1	0.1231	8.52126	8.5198	8.61718	8.6319	8.60262	8.55272
66646	chr1-598	chr1	66700838	66701108	+	13.1	0.561	exon (NM_001310642, exon 1 of 7)	exon (NM_001310642, exon 1 of 7)	142	NM_001310643	Mm.240912	NM_025683	ENSMUSG00000026005	Rpe	2810429B02Rik|5730518J08Rik	ribulose-5-phosphate-3-epimerase	protein-coding	Rpe	10347106	0.555588	0.0902228	24	5	0	7.55067	7.77869	7.6511	7.71211	7.57358	7.67402
68099	chr4-1329	chr4	12171638	12171908	+	8.02	0.583	exon (NM_001310743, exon 1 of 8)	exon (NM_001310743, exon 1 of 8)	242	NM_026558	Mm.25340	NM_026558	ENSMUSG00000028218	Fam92a	6720467C03Rik|Fam92a1	family with sequence similarity 92, member A	protein-coding	Fam92a	10511617	1	1	20	7.5	0.0339128	89.829	98.4221	99.6039	103.677	92.8654	92.4749
66904	chr9-714	chr9	101034563	101034833	+	13.9	0.771	exon (NM_001311149, exon 1 of 14)	exon (NM_001311149, exon 1 of 14)	186	NM_025835	Mm.335385	NM_025835	ENSMUSG00000032527	Pccb	1300012P06Rik|AI314687|R74805	propionyl Coenzyme A carboxylase, beta polypeptide	protein-coding	Pccb	10596053	0.418067	0.0538095	24	10.5	0.0843013	457.279	444.078	475.345	481.342	462.138	445.336
76560	chr7-33	chr7	127935484	127935754	+	32.1	0.699	exon (NM_001319147, exon 10 of 15)	exon (NM_001319147, exon 10 of 15)	-5506	NM_133351	Mm.5875	NM_133351	ENSMUSG00000030800	Prss8	2410039E18Rik|AI313909|C79772|CAP1|fr|mCAP1	protease, serine 8 (prostasin)	protein-coding	Prss8	10568332	1	1	20	13.1667	0	34.0471	31.953	29.5364	30.9595	30.8022	30.5593
66266	chr12-184	chr12	54695609	54695879	+	16.8	0.675	exon (NM_001331162, exon 1 of 5)	exon (NM_001331162, exon 1 of 5)	150	NM_001331162	Mm.156440	NM_025456	ENSMUSG00000054302	Eapp	1810011O16Rik	E2F-associated phosphoprotein	protein-coding	Eapp	10400326	0.922182	0.232281	12	1	0.053627	8.39177	8.31804	8.31593	8.4659	8.32785	8.42195
231670	chr5-606	chr5	117976763	117977033	+	12.4	0.621	exon (NM_001346588, exon 1 of 12)	exon (NM_001346588, exon 1 of 12)	128	NM_145564	Mm.21912	NM_145564	ENSMUSG00000032898	Fbxo21	2810425J22Rik|AU016673	F-box protein 21	protein-coding	Fbxo21	10524941	0.111763	0.00609984	24	13.5	0.0851074	265.813	270.972	309.928	320.884	304.378	286.408
56531	chr12-562	chr12	84996884	84997154	+	10.9	0.679	exon (NM_001347421, exon 1 of 20)	exon (NM_001347421, exon 1 of 20)	698	NM_178363	Mm.153183	NM_178363	ENSMUSG00000021244	Ylpm1	A930013E17Rik|ZAP|Zap3	YLP motif containing 1	protein-coding	Ylpm1	10397281	1	1	20	7.16667	0.0226871	214.367	258.188	251.867	230.279	222.056	233.157
66671	chr13-181	chr13	85189511	85189781	+	16.8	0.571	exon (NM_001347588, exon 1 of 9)	exon (NM_001347588, exon 1 of 9)	261	NM_023243	Mm.18474	NM_023243	ENSMUSG00000021548	Ccnh	6330408H09Rik|AI661354|AV102684|AW538719	cyclin H	protein-coding	Ccnh	10406482	0.377948	0.044983	12	1	0.137454	496.242	441.938	458.819	511.482	471.695	423.368
170459	chr18-233	chr18	33213516	33213786	+	13.1	0.513	exon (NM_001347624, exon 1 of 6)	exon (NM_001347624, exon 1 of 6)	211	NM_001347624	Mm.127058	NM_133774	ENSMUSG00000024378	Stard4	4632419C16Rik|9030213J02Rik	StAR-related lipid transfer (START) domain containing 4	protein-coding	Stard4	10458033	1	1	20	6.83333	0.00740576	6.15412	6.14948	6.29005	6.32502	5.986	6.1272
64009	chr10-1079	chr10	5289345	5289615	+	8.75	0.65	exon (NM_001347711, exon 55 of 146)	exon (NM_001347711, exon 55 of 146)	-94773	NM_001079686	Mm.331626	NM_022027	ENSMUSG00000096054	Syne1	8B|A330049M09Rik|BE692247|C130039F11Rik|CPG2|Myne1|mKIAA1756|myne-1	spectrin repeat containing, nuclear envelope 1	protein-coding	Syne1	10361509	0.66424	0.125235	24	2	0.0417193	8.47238	8.46112	8.43936	8.38417	8.36385	8.49479
64009	chr10-1079	chr10	5289345	5289615	+	8.75	0.65	exon (NM_001347711, exon 55 of 146)	exon (NM_001347711, exon 55 of 146)	-94773	NM_001079686	Mm.331626	NM_022027	ENSMUSG00000096054	Syne1	8B|A330049M09Rik|BE692247|C130039F11Rik|CPG2|Myne1|mKIAA1756|myne-1	spectrin repeat containing, nuclear envelope 1	protein-coding	Syne1	10361381	1	0.410551	12	0	0.058506	7.87172	7.89202	7.88743	7.98116	7.90836	7.97187
11767	chr8-201	chr8	72240097	72240367	+	18.2	0.66	exon (NM_007456, exon 1 of 12)	exon (NM_007456, exon 1 of 12)	214	NM_007456	Mm.290086	NM_007456	ENSMUSG00000003033	Ap1m1	AA408894|AP47|Adtm1A|Cltnm|mu1A	adaptor-related protein complex AP-1, mu subunit 1	protein-coding	Ap1m1	10572786	0.608446	0.10647	24	9	0.0458912	305.096	313.624	366.35	362.87	332.864	321.818
12013	chr16-429	chr16	87719747	87720017	+	10.9	0.643	exon (NM_007520, exon 3 of 5)	exon (NM_007520, exon 3 of 5)	20928	NM_007520	Mm.26147	NM_007520	ENSMUSG00000025612	Bach1	6230421P05Rik|AI323795	BTB and CNC homology 1, basic leucine zipper transcription factor 1	protein-coding	Bach1	10436734	1	0.410551	12	1	0.0461175	422.059	383.255	386.319	399.732	421.76	404.002
12211	chr17-169	chr17	74579581	74579851	+	16	0.758	exon (NM_007566, exon 9 of 73)	exon (NM_007566, exon 9 of 73)	51421	NM_007566	Mm.442564	NM_007566	ENSMUSG00000024073	Birc6	A430032G04Rik|A430040A19Rik|AA501170|Bruce|D630005A10Rik|mKIAA1289	baculoviral IAP repeat-containing 6	protein-coding	Birc6	10446833	0.66424	0.125235	12	1	0	846.872	906.322	910.875	878.422	868.234	872.535
12328	chr13-110	chr13	55622980	55623250	+	17.5	0.652	exon (NM_007596, exon 1 of 4)	exon (NM_007596, exon 1 of 4)	110	NM_007596	Mm.2313	NM_007596	ENSMUSG00000021501	Caml	AI385748|Camlg	calcium modulating ligand	protein-coding	Caml	10405504	1	1	20	12.5	0.0519338	118.365	117.101	117.825	124.456	136.039	136.251
12492	chr5-64	chr5	92505144	92505414	+	24.8	0.784	exon (NM_007644, exon 1 of 12)	exon (NM_007644, exon 1 of 12)	378	NM_007644	Mm.297964	NM_007644	ENSMUSG00000029426	Scarb2	9330185J12Rik|Cd36l2|LGP85|LIMP II|LIMP-2|MLGP85	scavenger receptor class B, member 2	protein-coding	Scarb2	10531437	0.852649	0.199965	12	2	0.128906	660.118	604.53	526.522	661.281	576.581	565.471
12867	chr13-380	chr13	86046481	86046751	+	11.7	0.613	exon (NM_007749, exon 1 of 3)	exon (NM_007749, exon 1 of 3)	179	NM_007749	Mm.378898	NM_007749	ENSMUSG00000017778	Cox7c	COXVIIc|Cox7c1	cytochrome c oxidase subunit VIIc	protein-coding	Cox7c	10388461	1	1	20	9.16667	0.00292271	6849.58	6889.1	6761.84	6865.27	6900.09	6519.29
12892	chr16-78	chr16	58670336	58670606	+	19	0.6	exon (NM_007757, exon 1 of 7)	exon (NM_007757, exon 1 of 7)	263	NM_007757	Mm.291519	NM_007757	ENSMUSG00000022742	Cpox	CPX|Cpo|HCP|cac|nct	coproporphyrinogen oxidase	protein-coding	Cpox	10436392	0.66424	0.125235	12	2	0.0365574	233.99	207.199	225.753	252.682	214.456	222.287
12929	chr16-230	chr16	17452411	17452681	+	14.6	0.535	exon (NM_007764, exon 1 of 3)	exon (NM_007764, exon 1 of 3)	561	NM_007764	Mm.21048	NM_007764	ENSMUSG00000006134	Crkl	1110025F07Rik|AA589403|AI325100|Crkol	v-crk avian sarcoma virus CT10 oncogene homolog-like	protein-coding	Crkl	10434003	0.505682	0.0762022	12	0	0.015521	556.674	570.439	548.702	587.93	516.953	524.788
13014	chr10-453	chr10	78425676	78425946	+	13.1	0.564	exon (NM_007793, exon 1 of 3)	exon (NM_007793, exon 1 of 3)	141	NM_007793	Mm.6095	NM_007793	ENSMUSG00000005054	Cstb	AA960480|Stfb	cystatin B	protein-coding	Cstb	10364375	0.66424	0.125235	24	12.5	0.0330431	139.331	156.889	141.426	162.943	138.333	130.601
13382	chr12-578	chr12	31351198	31351468	+	10.9	0.545	exon (NM_007861, exon 1 of 14)	exon (NM_007861, exon 1 of 14)	138	NM_007861	Mm.3131	NM_007861	ENSMUSG00000020664	Dld	-	dihydrolipoamide dehydrogenase	protein-coding	Dld	10399825	1	0.357622	12	1	0.111864	1721.56	1694.92	1740.88	2031.32	1863.37	1611.4
13559	chr3-619	chr3	14578809	14579079	+	11.7	0.645	exon (NM_007892, exon 1 of 8)	exon (NM_007892, exon 1 of 8)	273	NM_007892	Mm.153415	NM_007892	ENSMUSG00000027552	E2f5	AU024671|E2F-5	E2F transcription factor 5	protein-coding	E2f5	10490894	1	1	20	8.83333	0.00762497	61.6424	66.6545	67.1972	66.5612	69.7272	66.9415
13861	chr11-1989	chr11	87871211	87871481	+	8.02	0.722	exon (NM_007946, exon 7 of 13)	exon (NM_007946, exon 7 of 13)	4190	NM_007946	Mm.1315	NM_007946	ENSMUSG00000052234	Epx	EPO	eosinophil peroxidase	protein-coding	Epx	10389654	0.922182	0.232281	12	6	0.109962	20.4126	22.7359	21.3501	21.3569	21.8412	20.8913
14070	chrX-41	chrX	73228554	73228824	+	13.9	0.5	exon (NM_007978, exon 1 of 1)	exon (NM_007978, exon 1 of 1)	383	NM_007978	Mm.165807	NM_007978	ENSMUSG00000078317	F8a	AI852759|DXUcsf1|F8a1	factor 8-associated gene A	protein-coding	F8a	10600144	1	1	20	6.5	0	56.2371	50.0341	62.9406	60.5158	67.7289	58.531
14296	chr19-263	chr19	41830158	41830428	+	14.6	0.758	exon (NM_008043, exon 1 of 1)	exon (NM_008043, exon 1 of 1)	323	NM_008043	Mm.4573	NM_008043	ENSMUSG00000067199	Frat1	AW060382	frequently rearranged in advanced T cell lymphomas	protein-coding	Frat1	10463164	0.922182	0.232281	12	7.5	0.00815648	102.913	106.085	126.569	106.276	124.127	131.729
14297	chr19-417	chr19	24280283	24280553	+	12.4	0.633	exon (NM_008044, exon 1 of 5)	exon (NM_008044, exon 1 of 5)	168	NM_008044	Mm.7319	NM_008044	ENSMUSG00000059363	Fxn	FA|FARR|Frda|X25	frataxin	protein-coding	Fxn	10466771	1	1	20	11.8333	0.0346467	178.571	164.018	158.292	180.935	186.342	198.731
14489	chr6-412	chr6	35539465	35539735	+	14.6	0.571	exon (NM_008098, exon 1 of 4)	exon (NM_008098, exon 1 of 4)	288	NM_008098	Mm.182746	NM_008098	ENSMUSG00000029840	Mtpn	5033418D15Rik|Gcdp|V1	myotrophin	protein-coding	Mtpn	10543944	0.555588	0.0902228	24	6	0.0493843	286.504	342.904	330.018	326.693	304.353	297.42
14682	chr19-163	chr19	16133297	16133567	+	17.5	0.6	exon (NM_008139, exon 1 of 7)	exon (NM_008139, exon 1 of 7)	601	NM_008139	Mm.439701	NM_008139	ENSMUSG00000024639	Gnaq	1110005L02Rik|6230401I02Rik|AA408290|AW060788|Dsk1|Dsk10|Galphaq|Gq|GqI	guanine nucleotide binding protein, alpha q polypeptide	protein-coding	Gnaq	10461844	0.608446	0.10647	24	5	0.000799031	346.824	349.319	359.785	356.002	324.891	349.386
14775	chr9-145	chr9	108339290	108339560	+	19.7	0.604	exon (NM_008160, exon 1 of 2)	exon (NM_008160, exon 1 of 2)	345	NM_001329527	Mm.1090	NM_008160	ENSMUSG00000063856	Gpx1	AI195024|AL033363|CGPx|GPx-1|GSHPx-1|Gpx	glutathione peroxidase 1	protein-coding	Gpx1	10588899	0.215927	0.0173912	24	2.5	0.0401354	8.8371	9.08504	8.71454	8.87721	8.55815	8.82397
15161	chrX-16	chrX	73954995	73955265	+	20.4	0.63	exon (NM_008224, exon 8 of 26)	exon (NM_008224, exon 8 of 26)	11227	NM_008224	Mm.491126	NM_008224	ENSMUSG00000031386	Hcfc1	AW060991|HCF|HCF1	host cell factor C1	protein-coding	Hcfc1	10605195	0.555588	0.0902228	24	14	0.0811546	437.64	411.609	479.564	461.159	415.435	423.386
15228	chr12-600	chr12	49385450	49385720	+	10.2	0.667	exon (NM_008241, exon 2 of 2)	exon (NM_008241, exon 2 of 2)	2578	NM_008241	Mm.4704	NM_008241	ENSMUSG00000020950	Foxg1	2900064B05Rik|BF-1|Bf1|Hfh9|Hfhbf1	forkhead box G1	protein-coding	Foxg1	10395596	1	1	20	10.5	0	46.0832	43.0124	40.6992	46.2689	44.2983	45.5349
16403	chr2-1842	chr2	71787124	71787394	+	9.48	0.615	exon (NM_008397, exon 1 of 26)	exon (NM_008397, exon 1 of 26)	320	NM_008397	Mm.225096	NM_008397	ENSMUSG00000027111	Itga6	5033401O05Rik|AI115430|Cd49f|VLA-6	integrin alpha 6	protein-coding	Itga6	10472820	0.215927	0.0173912	24	11	0.285014	229.686	348.308	347.375	455.21	269.102	249.693
17300	chr13-247	chr13	31807858	31808128	+	14.6	0.706	exon (NM_008592, exon 1 of 1)	exon (NM_008592, exon 1 of 1)	1347	NM_008592	Mm.12949	NM_008592	ENSMUSG00000050295	Foxc1	FREAC3|Fkh1|Mf1|Mf4|ch|fkh-1|frkhda	forkhead box C1	protein-coding	Foxc1	10404407	0.304521	0.0311014	24	16	0.101477	65.3851	59.0023	62.7068	57.1159	74.8515	69.2653
17755	chr13-372	chr13	99516285	99516555	+	12.4	0.71	exon (NM_008634, exon 1 of 7)	exon (NM_008634, exon 1 of 7)	182	NM_008634	Mm.4173	NM_008634	ENSMUSG00000052727	Map1b	A230055D22|AI843217|LC1|MAP5|Mtap-5|Mtap1b|Mtap5	microtubule-associated protein 1B	protein-coding	Mtap1b	10411519	1	1	20	13.5	0.0146866	8.49786	8.75357	8.78297	8.97721	8.54902	8.69538
17878	chr10-638	chr10	107494166	107494436	+	10.2	0.655	exon (NM_008657, exon 1 of 3)	exon (NM_008657, exon 1 of 3)	428	NM_008657	Mm.11	NM_008657	ENSMUSG00000035923	Myf6	MRF4|bHLHc4|herculin	myogenic factor 6	protein-coding	Myf6	10372230	0.00673042	9.66e-05	24	0	0.198061	2723.22	2137.19	2115.52	1990.48	2160.43	2417
18074	chr14-401	chr14	19751340	19751610	+	11.7	0.792	exon (NM_008695, exon 1 of 21)	exon (NM_008695, exon 1 of 21)	218	NM_008695	Mm.20348	NM_008695	ENSMUSG00000021806	Nid2	AW547149|Ly111|NID-2|entactin-2|nidogen-2	nidogen 2	protein-coding	Nid2	10412921	1	1	20	8.5	0.0368489	91.5209	101.502	96.5022	89.4376	90.4752	92.616
69094	chr7-945	chr7	16463190	16463460	+	10.9	0.652	exon (NM_008718, exon 6 of 12)	exon (NM_008718, exon 6 of 12)	10546	NM_026938	Mm.29633	NM_026938	ENSMUSG00000019158	Tmem160	1810008O21Rik	transmembrane protein 160	protein-coding	Tmem160	10550316	1	0.536501	24	14	0.0319612	985.451	969.905	952.133	1067.12	1000.77	998.19
18217	chr12-244	chr12	16653545	16653815	+	16	0.649	exon (NM_008747, exon 1 of 4)	exon (NM_008747, exon 1 of 4)	210	NM_008747	Mm.281715	NM_008747	ENSMUSG00000020591	Ntsr2	NT2R|NTRL	neurotensin receptor 2	protein-coding	Ntsr2	10394685	1	1	20	10.1667	0	125.119	108.157	103.922	114.332	97.4284	112.283
18230	chr11-125	chr11	76398621	76398891	+	22.6	0.609	exon (NM_008750, exon 1 of 8)	exon (NM_008750, exon 1 of 8)	385	NM_008750	Mm.27915	NM_008750	ENSMUSG00000020844	Nxn	l11Jus13	nucleoredoxin	protein-coding	Nxn	10388532	1	1	20	9.83333	0.0169431	843.182	755.365	823.366	831.297	848.488	844.287
18582	chr1-364	chr1	86582170	86582440	+	16.8	0.658	exon (NM_008801, exon 1 of 5)	exon (NM_008801, exon 1 of 5)	196	NM_008801	Mm.12925	NM_008801	ENSMUSG00000026239	Pde6d	AI841218|PrBP/delta	phosphodiesterase 6D, cGMP-specific, rod, delta	protein-coding	Pde6d	10356339	1	1	20	5.83333	0.00437621	1263.84	1208.33	1161.04	1277.85	1224.35	1203.4
18679	chrX-155	chrX	102643757	102644027	+	8.02	0.7	exon (NM_008832, exon 1 of 33)	exon (NM_008832, exon 1 of 33)	354	NM_173021	Mm.212889	NM_008832	ENSMUSG00000034055	Phka1	5330411D17|9830108K24Rik|Phka	phosphorylase kinase alpha 1	protein-coding	Phka1	10606102	1	0.357622	12	3	0.115258	12.3231	12.165	12.068	12.1566	12.219	12.1807
19062	chr11-74	chr11	75620160	75620430	+	31.3	0.632	exon (NM_008850, exon 10 of 12)	exon (NM_008850, exon 10 of 12)	-10725	NM_008916	Mm.1458	NM_008916	ENSMUSG00000006127	Inpp5k	C62|Pps|SKIP	inositol polyphosphate 5-phosphatase K	protein-coding	Inpp5k	10378681	1	0.998554	24	17.5	0.0453963	760.846	770.451	801.362	785.148	788.081	805.511
18779	chr2-1127	chr2	60552927	60553197	+	10.2	0.68	exon (NM_008867, exon 1 of 30)	exon (NM_008867, exon 1 of 30)	246	NM_008867	Mm.5092	NM_008867	ENSMUSG00000054580	Pla2r1	Pla2-r|Pla2g1br|Pla2r	phospholipase A2 receptor 1	protein-coding	Pla2r1	10482968	0.723213	0.146835	24	12	0.109686	84.7393	83.2051	86.3911	99.1046	79.3182	83.4222
18976	chr12-351	chr12	3960003	3960273	+	12.4	0.742	exon (NM_008895, exon 3 of 3)	exon (NM_008895, exon 3 of 3)	5193	NM_001278583	Mm.277996	NM_008895	ENSMUSG00000020660	Pomc	ACTH|BE|Beta-LPH|Clip|Gamma-LPH|Npp|Pomc-1|Pomc1|alpha-MSH|alphaMSH|beta-MSH|gamma-MSH	pro-opiomelanocortin-alpha	protein-coding	Pomc	10394240	0.922182	0.232281	12	7	0.00694379	5.37242	5.23064	5.2525	5.06184	5.42396	5.34056
19185	chr3-98	chr3	95042374	95042644	+	19.7	0.696	exon (NM_008951, exon 1 of 10)	exon (NM_008951, exon 1 of 10)	105	NM_001282017	Mm.2261	NM_008951	ENSMUSG00000005625	Psmd4	Af1|Mcb1|angiocidin	proteasome (prosome, macropain) 26S subunit, non-ATPase, 4	protein-coding	Psmd4	10500054	1	0.886572	24	21	0.035914	9.09725	8.98297	8.97615	8.95899	8.96313	9.03454
19288	chr3-182	chr3	66220595	66220865	+	17.5	0.714	exon (NM_008987, exon 2 of 3)	exon (NM_008987, exon 2 of 3)	843	NM_008987	Mm.276776	NM_008987	ENSMUSG00000027832	Ptx3	AI607804|TSG-14	pentraxin related gene	protein-coding	Ptx3	10492448	0.190788	0.0142182	24	14.5	0.114806	53.8282	51.7544	57.7636	56.3249	63.1872	58.42
19720	chr13-163	chr13	21180543	21180813	+	17.5	0.651	exon (NM_009054, exon 1 of 8)	exon (NM_009054, exon 1 of 8)	747	NM_009054	Mm.314056	NM_009054	ENSMUSG00000021326	Trim27	AW538890|Gm19403|Rfp	tripartite motif-containing 27	protein-coding	Trim27	10403903	0.66424	0.125235	24	7	0	228.5	236.724	201.997	219.794	229.069	215.819
20229	chrX-178	chrX	155216017	155216287	+	8.02	0.586	exon (NM_009121, exon 1 of 6)	exon (NM_009121, exon 1 of 6)	297	NM_001291865	Mm.2734	NM_009121	ENSMUSG00000025283	Sat1	AA617398|SSAT|Sat	spermidine/spermine N1-acetyl transferase 1	protein-coding	Sat1	10607467	1	0.469977	24	11	0.196526	6.995	7.26768	7.28387	7.43489	7.28012	7.0451
20768	chr7-343	chr7	127273703	127273973	+	16	0.519	exon (NM_009266, exon 1 of 1)	exon (NM_009266, exon 1 of 1)	221	NM_009266	Mm.20294	NM_009266	ENSMUSG00000049091	Sephs2	Sps2|Ysg3	selenophosphate synthetase 2	protein-coding	Sephs2	10568221	0.418067	0.0538095	12	1	0.0892157	280.619	251.949	254.673	264.285	243.902	224.693
20972	chr15-76	chr15	80091319	80091589	+	19.7	0.694	exon (NM_009303, exon 1 of 4)	exon (NM_009303, exon 1 of 4)	120	NM_009303	Mm.230301	NM_009303	ENSMUSG00000022415	Syngr1	R75468|Syngr1b|p29	synaptogyrin 1	protein-coding	Syngr1	10425335	1	1	20	10.8333	0.0229079	478.843	443.497	451.071	457.824	474.587	472.267
21950	chr17-462	chr17	57105413	57105683	+	14.6	0.786	exon (NM_009404, exon 1 of 3)	exon (NM_009404, exon 1 of 3)	163	NM_009404	Mm.41171	NM_009404	ENSMUSG00000035678	Tnfsf9	4-1BB-L|4-1BBL|AI848817|Cd137l|Ly63l	tumor necrosis factor (ligand) superfamily, member 9	protein-coding	Tnfsf9	10446229	1	0.289814	24	14	0.0135765	23.9269	21.2742	23.2626	23.3521	23.3336	22.6006
22184	chrX-171	chrX	163958150	163958420	+	8.02	0.7	exon (NM_009453, exon 1 of 11)	exon (NM_009453, exon 1 of 11)	381	NM_009453	Mm.426178	NM_009453	ENSMUSG00000031370	Zrsr2	35kDa|5031411E02Rik|A230052C13Rik|C77286|U2af1-rs2|URP	zinc finger (CCCH type), RNA binding motif and serine/arginine rich 2	protein-coding	Zrsr2	10607724	1	0.536501	24	14	0.0387212	161.535	152.01	155.843	183.807	162.252	172.698
22330	chr14-121	chr14	20929433	20929703	+	19.7	0.608	exon (NM_009502, exon 1 of 21)	exon (NM_009502, exon 1 of 21)	135	NM_009502	Mm.279361	NM_009502	ENSMUSG00000021823	Vcl	9430097D22|AA571387|AI462105|AW545629	vinculin	protein-coding	Vcl	10413059	1	1	20	5.16667	0.00840671	683.473	646.278	632.92	685.465	617.596	630.822
22409	chr1-196	chr1	74803078	74803348	+	19	0.744	exon (NM_009518, exon 4 of 4)	exon (NM_009518, exon 4 of 4)	11194	NM_009518	Mm.5130	NM_009518	ENSMUSG00000026167	Wnt10a	-	wingless-type MMTV integration site family, member 10A	protein-coding	Wnt10a	10347497	0.66424	0.125235	24	18	0.0821517	101.867	81.3139	80.642	86.4827	89.4798	96.893
22627	chr11-139	chr11	75732934	75733204	+	24.1	0.638	exon (NM_009536, exon 1 of 6)	exon (NM_009536, exon 1 of 6)	182	NM_009536	Mm.234700	NM_009536	ENSMUSG00000020849	Ywhae	AU019196	tyrosine 3-monooxygenase/tryptophan 5-monooxygenase activation protein, epsilon polypeptide	protein-coding	Ywhae	10378739	1	0.469977	24	16.5	0.028355	2564.92	2378.44	2469.49	2572.22	2468.81	2608.85
22722	chr2-483	chr2	168955004	168955274	+	13.9	0.628	exon (NM_009564, exon 1 of 6)	exon (NM_009564, exon 1 of 6)	448	NM_009564	Mm.2095	NM_009564	ENSMUSG00000027551	Zfp64	-	zinc finger protein 64	protein-coding	Zfp64	10490028	1	1	20	10.5	0.0213633	143.869	137.827	143.173	138.716	153.977	150.197
11564	chr15-20	chr15	80948473	80948743	+	33.5	0.72	exon (NM_009634, exon 1 of 13)	exon (NM_009634, exon 1 of 13)	118	NM_009634	Mm.38151	NM_009634	ENSMUSG00000022407	Adsl	Adl|Asl	adenylosuccinate lyase	protein-coding	Adsl	10425461	1	0.73924	24	14	0.0330926	1279.35	1193.27	1237.83	1259.82	1258.77	1289.86
11834	chr2-1635	chr2	114175010	114175280	+	8.75	0.583	exon (NM_009702, exon 1 of 35)	exon (NM_009702, exon 1 of 35)	194	NM_009702	Mm.2545	NM_009702	ENSMUSG00000040383	Aqr	AW495846|mKIAA0560	aquarius	protein-coding	Aqr	10485989	1	0.886572	12	1	0.0557766	351.978	398.891	388.581	412	362.368	384.439
11881	chr13-367	chr13	93771783	93772053	+	12.4	0.7	exon (NM_009712, exon 1 of 8)	exon (NM_009712, exon 1 of 8)	239	NM_009712	Mm.300178	NM_009712	ENSMUSG00000042082	Arsb	1110007C02Rik|AI480648|As-1|As-1r|As-1s|As-1t|As1|As1-r|As1-s|As1-t|Asr-1|Ast-1	arylsulfatase B	protein-coding	Arsb	10406663	0.0521571	0.00192078	24	6	0.116715	124.102	161.973	154.754	150.584	128.411	125.288
12224	chr14-333	chr14	99298884	99299154	+	11.7	0.583	exon (NM_009769, exon 1 of 4)	exon (NM_009769, exon 1 of 4)	328	NM_009769	Mm.30262	NM_009769	ENSMUSG00000005148	Klf5	4930520J07Rik|Bteb2|CKLF|IKLF	Kruppel-like factor 5	protein-coding	Klf5	10416777	0.505682	0.0762022	24	14	0.0935526	182.835	171.411	193.759	199.851	185.032	170.668
12237	chr7-796	chr7	131560670	131560940	+	11.7	0.586	exon (NM_009774, exon 2 of 8)	exon (NM_009774, exon 2 of 8)	311	NM_001317350	Mm.927	NM_009774	ENSMUSG00000066979	Bub3	AU019800|AU021329|AU043350|AW146323|C78067	BUB3 mitotic checkpoint protein	protein-coding	Bub3	10558248	1	0.610752	12	10	0.0729805	8.82967	8.63636	8.77983	8.7777	8.71407	8.78876
12304	chr6-372	chr6	47813088	47813358	+	14.6	0.641	exon (NM_009787, exon 1 of 10)	exon (NM_009787, exon 1 of 10)	289	NM_009787	Mm.2442	NM_009787	ENSMUSG00000025823	Pdia4	AI987846|Cai|ERp-72|Erp72	protein disulfide isomerase associated 4	protein-coding	Pdia4	10544525	0.0316242	0.000907061	24	5	0.252395	278.882	343.023	297.208	294.044	254.59	256.414
12316	chr1-1534	chr1	139454799	139455069	+	8.75	0.593	exon (NM_009791, exon 1 of 28)	exon (NM_009791, exon 1 of 28)	161	NM_009791	Mm.168523	NM_009791	ENSMUSG00000033952	Aspm	Calmbp1|D330028K02Rik|MCPH5|Sha1	asp (abnormal spindle)-like, microcephaly associated (Drosophila)	protein-coding	Aspm	10350392	0.786454	0.171619	12	9	0.0739704	26.3392	24.3406	25.6604	25.5725	25.1694	26.5831
12339	chr14-302	chr14	31336787	31337057	+	13.1	0.611	exon (NM_009796, exon 1 of 21)	exon (NM_009796, exon 1 of 21)	198	NM_009796	Mm.201535	NM_009796	ENSMUSG00000021893	Capn7	AU022319|PalBH	calpain 7	protein-coding	Capn7	10413771	1	0.31062	12	2	0.00416486	768.515	768.068	765.384	796.135	787.207	772.998
12642	chr19-538	chr19	34474660	34474930	+	12.4	0.636	exon (NM_009890, exon 1 of 1)	exon (NM_009890, exon 1 of 1)	340	NM_009890	Mm.30824	NM_009890	ENSMUSG00000050370	Ch25h	AI462618|m25OH	cholesterol 25-hydroxylase	protein-coding	Ch25h	10467136	0.994691	0.269008	24	20	0.0903258	27.8173	25.4602	26.4374	26.187	25.7641	29.7765
13136	chr1-491	chr1	130462439	130462709	+	12.4	0.5	exon (NM_010016, exon 1 of 10)	exon (NM_010016, exon 1 of 10)	170	NM_010016	Mm.101591	NM_010016	ENSMUSG00000026399	Cd55	Daf|Daf-GPI|Daf1|GPI-DAF	CD55 molecule, decay accelerating factor for complement	protein-coding	Cd55	10357488	0.994691	0.269008	12	2.5	0.0673307	502.416	486.39	383.715	457.475	443.574	391.726
13603	chr1-808	chr1	175692121	175692391	+	12.4	0.595	exon (NM_010098, exon 1 of 4)	exon (NM_010098, exon 1 of 4)	376	NM_010098	Mm.32744	NM_010098	ENSMUSG00000026525	Opn3	ERO|Ecpn	opsin 3	protein-coding	Opn3	10360454	1	1	20	7.5	0.0380423	69.8312	76.3565	72.7291	73.5763	77.0546	67.713
14219	chr10-289	chr10	24595614	24595884	+	17.5	0.705	exon (NM_010217, exon 1 of 5)	exon (NM_010217, exon 1 of 5)	307	NM_010217	Mm.390287	NM_010217	ENSMUSG00000019997	Ctgf	Ccn2|Fisp12|Hcs24|fisp-12	connective tissue growth factor	protein-coding	Ctgf	10362201	0.0124456	0.00023376	24	17	0.379561	441.546	481.292	657.515	949.905	776.305	609.491
14544	chr19-658	chr19	21472307	21472577	+	8.75	0.722	exon (NM_010266, exon 1 of 14)	exon (NM_010266, exon 1 of 14)	219	NM_010266	Mm.45054	NM_010266	ENSMUSG00000058624	Gda	AU015411|AW047581|GAH	guanine deaminase	protein-coding	Gda	10466659	0.215927	0.0173912	12	3	0.116192	115.764	134.296	119.839	113.166	112.898	106.093
14673	chr5-511	chr5	140829951	140830221	+	12.4	0.6	exon (NM_010302, exon 1 of 4)	exon (NM_010302, exon 1 of 4)	345	NM_010302	Mm.370185	NM_010302	ENSMUSG00000000149	Gna12	AI414047|AI504261|Galpha12	guanine nucleotide binding protein, alpha 12	protein-coding	Gna12	10535273	0.460888	0.0641441	12	1	0.0699682	631.746	691.857	596.311	775.95	639.531	618.41
14674	chr11-203	chr11	109362870	109363140	+	22.6	0.524	exon (NM_010303, exon 1 of 4)	exon (NM_010303, exon 1 of 4)	211	NM_010303	Mm.193925	NM_010303	ENSMUSG00000020611	Gna13	AU024132|AU043124|Galpha13	guanine nucleotide binding protein, alpha 13	protein-coding	Gna13	10382243	0.00673042	9.66e-05	24	5	0.115435	874.861	984.795	923.412	926.02	774.14	756.596
14782	chr8-725	chr8	33653488	33653758	+	11.7	0.688	exon (NM_010344, exon 1 of 13)	exon (NM_010344, exon 1 of 13)	385	NM_010344	Mm.283573	NM_010344	ENSMUSG00000031584	Gsr	AI325518|D8Ertd238e|Gr-1|Gr1	glutathione reductase	protein-coding	Gsr	10571274	0.242857	0.0211898	24	10.5	0.0766362	375.024	378.424	399.131	421.91	407.142	375.578
15211	chr9-231	chr9	59539678	59539948	+	17.5	0.761	exon (NM_010421, exon 1 of 14)	exon (NM_010421, exon 1 of 14)	273	NM_010421	Mm.2284	NM_010421	ENSMUSG00000025232	Hexa	Hex-1	hexosaminidase A	protein-coding	Hexa	10585874	0.555588	0.0902228	12	3	0.140467	447.79	499.683	403.141	439.79	445.793	415.32
15212	chr13-195	chr13	97197923	97198193	+	15.3	0.694	exon (NM_010422, exon 1 of 14)	exon (NM_010422, exon 1 of 14)	299	NM_010422	Mm.27816	NM_010422	ENSMUSG00000021665	Hexb	-	hexosaminidase B	protein-coding	Hexb	10411373	0.922182	0.232281	12	3	0.162642	137.943	173.659	127.04	154.256	142.395	122.497
15270	chr9-156	chr9	44334784	44335054	+	19	0.547	exon (NM_010436, exon 1 of 1)	exon (NM_010436, exon 1 of 1)	204	NM_010436	Mm.245931	NM_010436	ENSMUSG00000049932	H2afx	AW228881|H2A.X|H2ax|Hist5-2ax|gammaH2ax	H2A histone family, member X	protein-coding	H2afx	10584710	1	1	20	6.83333	0.0287486	95.3294	96.6046	86.6633	74.2866	86.7174	90.9026
15402	chr6-386	chr6	52203877	52204147	+	15.3	0.75	exon (NM_010453, exon 1 of 2)	exon (NM_010453, exon 1 of 2)	575	NM_010453	Mm.173	NM_010453	ENSMUSG00000038253	Hoxa5	Hox-1.3	homeobox A5	protein-coding	Hoxa5	10544768	1	1	20	7.16667	0.000133565	102.736	111.555	120.379	107.055	107.481	105.753
15463	chr1-219	chr1	82839622	82839892	+	18.2	0.58	exon (NM_010472, exon 1 of 13)	exon (NM_010472, exon 1 of 13)	297	NM_001347077	Mm.392569	NM_010472	ENSMUSG00000026159	Agfg1	AU045498|C130049H11Rik|C85612|D730048C23Rik|Hrb|RAB|Rip	ArfGAP with FG repeats 1	protein-coding	Agfg1	10347873	1	0.410551	24	7.5	0.0217789	9.93616	10.0871	10.0065	10.0459	9.98778	10.0285
15939	chr1-135	chr1	155098383	155098653	+	19.7	0.545	exon (NM_010500, exon 1 of 1)	exon (NM_010500, exon 1 of 1)	1118	NM_010500	Mm.12246	NM_010500	ENSMUSG00000056708	Ier5	-	immediate early response 5	protein-coding	Ier5	10358978	1	1	20	7.5	0.00856149	80.5476	72.6822	80.9052	79.5952	76.0086	86.1763
15979	chr10-171	chr10	19591994	19592264	+	18.2	0.723	exon (NM_010511, exon 1 of 7)	exon (NM_010511, exon 1 of 7)	180	NM_010511	Mm.549	NM_010511	ENSMUSG00000020009	Ifngr1	CD119|IFN-gammaR|Ifgr|Ifngr|Nktar	interferon gamma receptor 1	protein-coding	Ifngr1	10361897	0.994691	0.269008	12	2	0.0447174	557.25	815.516	577.589	623.64	600.229	561.192
218210	chr13-385	chr13	46801216	46801486	+	12.4	0.821	exon (NM_010617, exon 18 of 38)	exon (NM_010617, exon 18 of 38)	-73502	NM_175749	Mm.255398	NM_175749	ENSMUSG00000021374	Nup153	B130015D15Rik|C88147	nucleoporin 153	protein-coding	Nup153	10408952	1	0.610752	12	2	0.0586687	981.599	956.944	926.547	973.772	947.866	932.293
16589	chr1-635	chr1	170214897	170215167	+	13.9	0.535	exon (NM_010633, exon 1 of 8)	exon (NM_010633, exon 1 of 8)	361	NM_010633	Mm.209150	NM_010633	ENSMUSG00000026667	Uhmk1	4732477C12Rik|4930500M09Rik|AA673513|AI449218|AU021979|C820018A03Rik|KIS|Kist|OTTMUSG00000021542|P-CIP2	U2AF homology motif (UHM) kinase 1	protein-coding	Uhmk1	10359961	0.505682	0.0762022	24	5	0.0249821	351.89	376.642	352.336	402.033	346.795	311.088
16661	chr11-949	chr11	99386546	99386816	+	12.4	0.645	exon (NM_010660, exon 6 of 8)	exon (NM_010660, exon 6 of 8)	2683	NM_010660	Mm.22662	NM_010660	ENSMUSG00000019761	Krt10	D130054E02Rik|K10|K1C1|Krt-1.10|Krt1-10	keratin 10	protein-coding	Krt10	10390831	0.14308	0.00848713	12	5	1.26099	64.0271	164.641	47.8309	50.7561	61.6304	46.5055
16815	chr6-430	chr6	83087644	83087914	+	13.9	0.688	exon (NM_010692, exon 2 of 2)	exon (NM_010692, exon 2 of 2)	1414	NM_010692	Mm.20359	NM_010692	ENSMUSG00000034968	Lbx2	Lbx2h	ladybird homeobox homolog 2 (Drosophila)	protein-coding	Lbx2	10539316	1	1	20	10.1667	0.0277029	38.1936	32.0555	31.5258	35.2903	32.7542	31.5573
16948	chr18-252	chr18	52528801	52529071	+	13.1	0.595	exon (NM_010728, exon 1 of 7)	exon (NM_010728, exon 1 of 7)	785	NM_001286181	Mm.172	NM_010728	ENSMUSG00000024529	Lox	AI893619|TSC-160|rrg	lysyl oxidase	protein-coding	Lox	10458894	1	0.31062	24	11	0.176953	6.4879	7.25041	6.93332	7.20392	6.89194	6.47387
17688	chr17-275	chr17	87975198	87975468	+	15.3	0.65	exon (NM_010830, exon 1 of 10)	exon (NM_010830, exon 1 of 10)	283	NM_010830	Mm.18210	NM_010830	ENSMUSG00000005370	Msh6	AU044881|AW550279|GTBP|Gtmbp	mutS homolog 6	protein-coding	Msh6	10447417	1	0.357622	12	2	0.0235537	35.7193	38.5971	35.8768	39.6132	35.8259	34.6461
17993	chr13-205	chr13	114387828	114388098	+	13.9	0.55	exon (NM_010887, exon 1 of 5)	exon (NM_010887, exon 1 of 5)	131	NM_010887	Mm.253142	NM_010887	ENSMUSG00000021764	Ndufs4	6720411N02Rik|C1-18k	NADH dehydrogenase (ubiquinone) Fe-S protein 4	protein-coding	Ndufs4	10412251	0.994691	0.269008	24	14	0.0437699	5169.47	4818.61	4981.28	5246.72	5169.83	4986.8
18114	chr10-153	chr10	78412715	78412985	+	21.1	0.621	exon (NM_010925, exon 1 of 13)	exon (NM_010925, exon 1 of 13)	193	NM_010925	Mm.38344	NM_010925	ENSMUSG00000061032	Rrp1	AL033305|AL033306|AU018604|NNP-1|Nnp1	ribosomal RNA processing 1 homolog (S. cerevisiae)	protein-coding	Rrp1	10370483	1	0.536501	12	1.5	0.112932	444.365	410.344	403.608	440.751	474.242	415.51
18538	chr2-277	chr2	132252727	132252997	+	16.8	0.696	exon (NM_011045, exon 1 of 6)	exon (NM_011045, exon 1 of 6)	318	NM_011045	Mm.7141	NM_011045	ENSMUSG00000027342	Pcna	-	proliferating cell nuclear antigen	protein-coding	Pcna	10461391	1	1	20	9.16667	0.000573542	358.349	413.404	397.026	428.039	425.616	434.511
19060	chr7-194	chr7	17027600	17027870	+	18.2	0.63	exon (NM_011155, exon 1 of 13)	exon (NM_011155, exon 1 of 13)	179	NM_011155	Mm.3294	NM_011155	ENSMUSG00000003099	Ppp5c	AU020526|PP5	protein phosphatase 5, catalytic subunit	protein-coding	Ppp5c	10560315	0.460888	0.0641441	12	5.5	0.0852665	652.001	609.423	598.92	645.521	631.794	654.918
19128	chr16-239	chr16	62854327	62854597	+	14.6	0.815	exon (NM_011173, exon 1 of 15)	exon (NM_011173, exon 1 of 15)	155	NM_011173	Mm.127156	NM_011173	ENSMUSG00000022912	Pros1	AW214361	protein S (alpha)	protein-coding	Pros1	10436456	1	0.357622	24	5.5	0.143896	98.017	130.856	111.99	117.157	105.931	101.851
19291	chr11-602	chr11	6475014	6475284	+	16	0.649	exon (NM_011221, exon 1 of 1)	exon (NM_011221, exon 1 of 1)	927	NM_011221	Mm.296150	NM_011221	ENSMUSG00000094483	Purb	2310015K15Rik|AA114818|Cager-2|D11Bwg0414e	purine rich element binding protein B	protein-coding	Purb	10384150	1	0.610752	21	7.5	0.0598654	576.697	674.764	654.083	693.706	614.858	613.513
19823	chr9-677	chr9	96478438	96478708	+	11.7	0.594	exon (NM_011279, exon 1 of 3)	exon (NM_011279, exon 1 of 3)	102	NM_001311135	Mm.28235	NM_011279	ENSMUSG00000051234	Rnf7	Rbx2|SAG	ring finger protein 7	protein-coding	Rnf7	10595803	1	1	20	9.16667	0.0147432	9.18018	9.2196	9.23157	9.40373	9.27311	9.26211
19823	chr9-677	chr9	96478438	96478708	+	11.7	0.594	exon (NM_011279, exon 1 of 3)	exon (NM_011279, exon 1 of 3)	102	NM_001311135	Mm.28235	NM_011279	ENSMUSG00000051234	Rnf7	Rbx2|SAG	ring finger protein 7	protein-coding	Rnf7	10353008	1	1	20	7.83333	0	6.2492	6.22134	6.22704	6.29013	6.13238	6.23002
20333	chr3-269	chr3	97901218	97901488	+	15.3	0.667	exon (NM_011342, exon 1 of 5)	exon (NM_011342, exon 1 of 5)	126	NM_011342	Mm.2551	NM_011342	ENSMUSG00000027879	Sec22b	4930564D15Rik|AA517334|AI480645|C81333|ERS-24|Sec22l1	SEC22 homolog B, vesicle trafficking protein	protein-coding	Sec22b	10494583	1	1	20	9.16667	0.0443348	409.236	398.672	440.284	440.491	416.104	387.916
20520	chr11-283	chr11	53891290	53891560	+	19.7	0.648	exon (NM_011396, exon 1 of 10)	exon (NM_011396, exon 1 of 10)	278	NM_011396	Mm.42253	NM_011396	ENSMUSG00000018900	Slc22a5	Lstpl|Octn2|jvs	solute carrier family 22 (organic cation transporter), member 5	protein-coding	Slc22a5	10385872	0.505682	0.0762022	24	14	6.28e-16	112.77	120.055	113.956	118.634	135.201	135.021
20595	chr13-87	chr13	100124829	100125099	+	19	0.739	exon (NM_011420, exon 1 of 9)	exon (NM_011420, exon 1 of 9)	109	NM_011420	Mm.2025	NM_011420	ENSMUSG00000021645	Smn1	AI849087|Gemin1|Smn	survival motor neuron 1	protein-coding	Smn1	10406881	0.786454	0.171619	12	2.5	0.0109177	93.4084	87.7946	87.369	91.2549	87.597	83.1861
20655	chr16-133	chr16	90220784	90221054	+	16.8	0.571	exon (NM_011434, exon 1 of 5)	exon (NM_011434, exon 1 of 5)	177	NM_011434	Mm.276325	NM_011434	ENSMUSG00000022982	Sod1	B430204E11Rik|Cu/Zn-SOD|CuZnSOD|Ipo-1|Ipo1|SODC|Sod-1	superoxide dismutase 1, soluble	protein-coding	Sod1	10436783	0.922182	0.232281	12	7	0.0362039	1974.54	2003.35	2146.99	1890.56	2019.24	2114.65
20679	chr7-213	chr7	115476993	115477263	+	19	0.689	exon (NM_011445, exon 17 of 17)	exon (NM_011445, exon 17 of 17)	324481	NM_001277328	Mm.323365	NM_011445	ENSMUSG00000051910	Sox6	AI987981|SOX-LZ	SRY (sex determining region Y)-box 6	protein-coding	Sox6	10567108	0.34014	0.0374712	24	10.5	0	10.0341	9.96161	9.99026	10.0877	9.97029	10.0028
268980	chr17-345	chr17	78736282	78736552	+	16	0.625	exon (NM_011500, exon 1 of 18)	exon (NM_011500, exon 1 of 18)	143	NM_011500	Mm.311915	NM_011500	ENSMUSG00000024077	Strn	AU022939|D130055P19	striatin, calmodulin binding protein	protein-coding	Strn	10452918	1	0.886572	24	6	0.0621759	155.653	187.542	187.94	194.455	176.828	169.203
21826	chr17-289	chr17	14681107	14681377	+	13.9	0.714	exon (NM_011581, exon 9 of 22)	exon (NM_011581, exon 9 of 22)	13020	NM_011581	Mm.26688	NM_011581	ENSMUSG00000023885	Thbs2	TSP2|Thbs-2	thrombospondin 2	protein-coding	Thbs2	10447951	0.377948	0.044983	24	12	0.207182	174.324	233.848	242.685	298.904	222.673	176.929
21871	chr5-745	chr5	124629064	124629334	+	12.4	0.697	exon (NM_011596, exon 1 of 20)	exon (NM_011596, exon 1 of 20)	147	NM_011596	Mm.1158	NM_011596	ENSMUSG00000038023	Atp6v0a2	8430408C20Rik|AI385560|ATP6a2|AW489264|Atp6n1d|Atp6n2|C76904|ISF|J6B7|SHIF|Stv1|TJ6M|TJ6s|Tj6|V-ATPase 116 kDa|V-ATPase a2	ATPase, H+ transporting, lysosomal V0 subunit A2	protein-coding	Atp6v0a2	10525804	1	0.693388	12	0	0.0755261	493.402	481.022	512.415	562.684	514.155	517.627
22063	chr9-940	chr9	95749742	95750012	+	9.48	0.773	exon (NM_011643, exon 1 of 13)	exon (NM_011643, exon 1 of 13)	481	NM_001311123	Mm.149633	NM_011643	ENSMUSG00000032839	Trpc1	Mtrp1|Trp1|Trrp1	transient receptor potential cation channel, subfamily C, member 1	protein-coding	Trpc1	10595753	0.555588	0.0902228	12	8.5	0.0828446	6.66914	6.85617	6.89153	6.87984	6.80863	7.10102
22160	chr12-560	chr12	33958392	33958662	+	10.9	0.75	exon (NM_011658, exon 1 of 2)	exon (NM_011658, exon 1 of 2)	856	NM_011658	Mm.3280	NM_011658	ENSMUSG00000035799	Twist1	M-Twist|Pde|Ska10|Ska<m10Jus>|Twist|bHLHa38|pdt	twist basic helix-loop-helix transcription factor 1	protein-coding	Twist1	10395320	1	1	20	9.16667	0.0231467	50.1897	46.8914	55.9048	48.4032	48.3401	48.2822
22687	chr9-271	chr9	46273346	46273616	+	17.5	0.667	exon (NM_011752, exon 2 of 14)	exon (NM_011752, exon 2 of 14)	417	NM_011752	Mm.17519	NM_011752	ENSMUSG00000032078	Zpr1	AI303781|Zfp259|Znf259	ZPR1 zinc finger	protein-coding	Zfp259	10585022	0.167635	0.011578	12	1	0.0522905	8.74194	8.66015	8.63107	8.67425	8.70667	8.68606
170719	chr15-1063	chr15	41101047	41101317	+	8.75	0.75	exon (NM_011766, exon 8 of 8)	exon (NM_011766, exon 8 of 8)	-346300	NM_001130166	Mm.254267	NM_130885	ENSMUSG00000022307	Oxr1	2210416C20Rik|C7|C7B	oxidation resistance 1	protein-coding	Oxr1	10423921	0.786454	0.171619	12	2	0	8.27017	8.19996	8.29697	8.29175	8.123	8.23903
22763	chr15-174	chr15	12136452	12136722	+	17.5	0.867	exon (NM_011767, exon 3 of 20)	exon (NM_011767, exon 3 of 20)	18736	NM_011767	Mm.273496	NM_011767	ENSMUSG00000022201	Zfr	C920030H05Rik	zinc finger RNA binding protein	protein-coding	Zfr	10423134	0.505682	0.0762022	12	1	0.035723	745.012	732.228	753.728	766.127	768.281	759.528
22785	chr2-1134	chr2	122702067	122702337	+	10.9	0.633	exon (NM_011774, exon 1 of 7)	exon (NM_011774, exon 1 of 7)	461	NM_011774	Mm.27801	NM_011774	ENSMUSG00000005802	Slc30a4	Znt4|lm|znT-4	solute carrier family 30 (zinc transporter), member 4	protein-coding	Slc30a4	10487021	1	0.469977	12	2	0.0620981	370.513	369.479	348.632	374.44	384.071	346.894
12985	chr11-255	chr11	98709474	98709744	+	20.4	0.737	exon (NM_011869, exon 19 of 26)	exon (NM_011869, exon 19 of 26)	8296	NM_009971	Mm.1238	NM_009971	ENSMUSG00000038067	Csf3	Csfg|G-CSF|MGI-IG	colony stimulating factor 3 (granulocyte)	protein-coding	Csf3	10380999	1	1	20	11.8333	0	38.5463	33.446	37.4138	32.9206	33.5256	33.0794
23992	chr2-279	chr2	76647699	76647969	+	16.8	0.604	exon (NM_011871, exon 1 of 8)	exon (NM_011871, exon 1 of 8)	160	NM_011871	Mm.277250	NM_011871	ENSMUSG00000002731	Prkra	AV120107|PRK|Pact|RAX|lear	protein kinase, interferon inducible double stranded RNA dependent activator	protein-coding	Prkra	10483856	1	0.410551	12	2	0.028751	49.1391	46.4018	42.3835	53.6922	50.4919	47.7626
26373	chr17-157	chr17	25133360	25133630	+	18.2	0.583	exon (NM_011930, exon 1 of 25)	exon (NM_011930, exon 1 of 25)	104	NM_011930	Mm.270587	NM_011930	ENSMUSG00000036636	Clcn7	ClC-7|D17Wsu51e	chloride channel, voltage-sensitive 7	protein-coding	Clcn7	10442691	0.377948	0.044983	12	0	0	168.915	174.457	173.83	200.374	152.366	187.844
26447	chr18-166	chr18	70530064	70530334	+	14.6	0.75	exon (NM_011972, exon 1 of 10)	exon (NM_011972, exon 1 of 10)	122	NM_001289516	Mm.244352	NM_011972	ENSMUSG00000038425	Poli	Rad30b	polymerase (DNA directed), iota	protein-coding	Poli	10459655	0.66424	0.125235	24	3	0	6.55762	6.61852	6.5143	6.3585	6.60748	6.66938
26897	chr12-738	chr12	84009517	84009787	+	10.2	0.654	exon (NM_012006, exon 1 of 3)	exon (NM_012006, exon 1 of 3)	150	NM_012006	Mm.1978	NM_012006	ENSMUSG00000072949	Acot1	ACH2|CTE-1|CTE-I|Cte1|D12Ucla1	acyl-CoA thioesterase 1	protein-coding	Acot1	10397148	0.186349	0.0128981	24	15	0.0849801	26.0281	24.9708	28.9596	31.2125	28.7763	26.4437
26992	chr8-362	chr8	88361391	88361661	+	15.3	0.727	exon (NM_012047, exon 2 of 17)	exon (NM_012047, exon 2 of 17)	665	NM_012047	Mm.5400	NM_012047	ENSMUSG00000031660	Brd7	BP75|CELTIX1|Ptpn13ip	bromodomain containing 7	protein-coding	Brd7	10580486	1	0.469977	12	2	0	754.957	725.268	755.695	770.163	744.398	771.237
27055	chr6-572	chr6	56832255	56832525	+	10.9	0.528	exon (NM_012056, exon 1 of 10)	exon (NM_012056, exon 1 of 10)	331	NM_012056	Mm.20943	NM_012056	ENSMUSG00000029781	Fkbp9	1810014L23|AW549641|FKBP-63|FKBP-9|FKBP60|FKBP63|FKBP65RS	FK506 binding protein 9	protein-coding	Fkbp9	10538547	0.146865	0.00939007	24	10	0.0841316	395.828	435.443	450.393	454.46	432.852	391.286
12946	chr1-606	chr1	195131079	195131349	+	13.1	0.676	exon (NM_013499, exon 1 of 10)	exon (NM_013499, exon 1 of 10)	356	NM_013499	Mm.301652	NM_013499	ENSMUSG00000016481	Cr1l	Crry|Mcp|mCRY	complement component (3b/4b) receptor 1-like	protein-coding	Cr1l	10361282	1	0.31062	12	1	0.0493914	121.826	142.269	134.445	136.495	126.609	118.706
13824	chr18-380	chr18	34005876	34006146	+	10.9	0.696	exon (NM_013512, exon 2 of 24)	exon (NM_013512, exon 2 of 24)	1195	NM_013512	Mm.3465	NM_013512	ENSMUSG00000024376	Epb41l4a	Epb4.1l4|Epb4.1l4a|NBL4	erythrocyte membrane protein band 4.1 like 4a	protein-coding	Epb4.1l4a	10458052	0.786454	0.171619	12	0	0.090043	5.60744	5.16774	5.63668	5.67834	5.3985	5.23276
14300	chr8-552	chr8	41416772	41417042	+	13.1	0.69	exon (NM_013522, exon 1 of 9)	exon (NM_013522, exon 1 of 9)	211	NM_013522	Mm.217312	NM_013522	ENSMUSG00000031590	Frg1	-	FSHD region gene 1	protein-coding	Frg1	10578377	0.922182	0.232281	24	14	0.0855387	143.536	153.171	153.625	174.29	152.559	146.805
20352	chr7-613	chr7	80198589	80198859	+	14.6	0.618	exon (NM_013659, exon 2 of 15)	exon (NM_013659, exon 2 of 15)	11883	NM_013659	Mm.275909	NM_013659	ENSMUSG00000030539	Sema4b	SemC|Semac|mKIAA1745	sema domain, immunoglobulin domain (Ig), transmembrane domain (TM) and short cytoplasmic domain, (semaphorin) 4B	protein-coding	Sema4b	10554375	1	0.610752	12	5	0	99.539	97.6163	97.6481	91.8788	99.1396	93.5269
27354	chr4-294	chr4	15957969	15958239	+	15.3	0.636	exon (NM_013752, exon 1 of 16)	exon (NM_013752, exon 1 of 16)	137	NM_013752	Mm.20866	NM_013752	ENSMUSG00000028224	Nbn	Nbs1	nibrin	protein-coding	Nbn	10503431	1	1	20	10.5	0.0391761	211.756	223.291	206.08	231.789	222.981	234.075
27357	chr3-701	chr3	20154864	20155134	+	9.48	0.643	exon (NM_013755, exon 1 of 7)	exon (NM_013755, exon 1 of 7)	117	NM_013755	Mm.6375	NM_013755	ENSMUSG00000019528	Gyg	AU017667|Gyg1	glycogenin	protein-coding	Gyg	10497441	1	0.31062	12	10	0.0207889	3466.11	3431.44	3529.63	3518.15	3353.38	3528.16
27412	chr7-1226	chr7	62464078	62464348	+	8.75	0.833	exon (NM_013788, exon 1 of 1)	exon (NM_013788, exon 1 of 1)	297	NM_013788	Mm.422745	NM_013788	ENSMUSG00000070526	Peg12	Frat3	paternally expressed 12	protein-coding	Peg12	10564266	1	1	20	11.5	0.0342138	130.3	120.116	145.752	126.177	137.702	124.482
30946	chr13-360	chr13	23423541	23423811	+	13.1	0.581	exon (NM_013924, exon 1 of 3)	exon (NM_013924, exon 1 of 3)	190	NM_013924	Mm.292094	NM_013924	ENSMUSG00000036376	Abt1	-	activator of basal transcription 1	protein-coding	Abt1	10408168	1	0.998554	24	17	0.0811688	134.813	124.628	132.102	140.723	138.662	143.042
269378	chr2-8	chr2	155050558	155050828	+	69.3	0.805	exon (NM_015770, exon 4 of 4)	exon (NM_015770, exon 4 of 4)	23804	NM_016661	Mm.330692	NM_016661	ENSMUSG00000027597	Ahcy	AA987153|AL024110|CuBP|SAHH	S-adenosylhomocysteine hydrolase	protein-coding	Ahcy	10344713	1	0.785093	12	1	0.0929775	431.447	424.214	383.6	419.44	428.131	413.164
50709	chr13-476	chr13	23622056	23622326	+	10.9	0.567	exon (NM_015787, exon 1 of 1)	exon (NM_015787, exon 1 of 1)	367	NM_015787	Mm.170587	NM_015787	ENSMUSG00000051627	Hist1h1e	H1-4|H1.4|H1e|H1f4|H1s-4|H1var2	histone cluster 1, H1e	protein-coding	Hist1h1e///Hist1h2be	10408212	0.0373613	0.00117065	24	10	0.114332	7.40878	7.44663	7.48554	7.61479	7.43594	7.14853
50755	chr2-613	chr2	11767201	11767471	+	13.1	0.733	exon (NM_015792, exon 3 of 21)	exon (NM_015792, exon 3 of 21)	10191	NM_015792	Mm.24088	NM_015792	ENSMUSG00000058594	Fbxo18	AU015756|Fbh1|Fbx18	F-box protein 18	protein-coding	Fbxo18	10480064	1	0.357622	24	3.5	0.00157685	186.858	204.326	202.008	200.571	186.134	208.505
11992	chr13-136	chr13	52929373	52929643	+	17.5	0.605	exon (NM_016709, exon 1 of 10)	exon (NM_016709, exon 1 of 10)	169	NM_016709	Mm.252034	NM_016709	ENSMUSG00000021460	Auh	C77140|W91705	AU RNA binding protein/enoyl-coenzyme A hydratase	protein-coding	Auh	10409265	0.215927	0.0173912	12	11	0.0438335	757.536	729.589	761.621	811.698	779.762	769.688
53328	chrX-124	chrX	36598294	36598564	+	9.48	0.517	exon (NM_016783, exon 1 of 3)	exon (NM_016783, exon 1 of 3)	236	NM_016783	Mm.9052	NM_016783	ENSMUSG00000006373	Pgrmc1	AA415812|HPR6.6|PPMR|Vema	progesterone receptor membrane component 1	protein-coding	Pgrmc1	10599200	0.190788	0.0142182	12	2.5	0.160761	144.807	183.91	141.842	157.595	148.405	148.328
53612	chr12-326	chr12	79172170	79172440	+	12.4	0.579	exon (NM_016800, exon 1 of 6)	exon (NM_016800, exon 1 of 6)	153	NM_016800	Mm.265929	NM_016800	ENSMUSG00000021124	Vti1b	AU015348|GES30|MVti1b|SNARE|Vti1-rp1	vesicle transport through interaction with t-SNAREs 1B	protein-coding	Vti1b	10401172	0.271867	0.0257197	12	1	0.155196	223.387	225.671	242.095	307.169	254.482	232.892
53375	chr2-517	chr2	74825881	74826151	+	12.4	0.684	exon (NM_016804, exon 1 of 10)	exon (NM_016804, exon 1 of 10)	204	NM_016804	Mm.292613	NM_016804	ENSMUSG00000027099	Mtx2	1500012G02Rik	metaxin 2	protein-coding	Mtx2	10472994	0.555588	0.0902228	24	13	0.149772	541.411	570.06	634.73	688.418	643.997	586.273
54138	chr15-244	chr15	85336385	85336655	+	16	0.737	exon (NM_016843, exon 1 of 12)	exon (NM_016843, exon 1 of 12)	139	NM_016843	Mm.248906	NM_016843	ENSMUSG00000016541	Atxn10	AI325283|C77170|E46|Sca10|TEG-169|Tex169	ataxin 10	protein-coding	Atxn10	10425966	1	0.610752	12	3	0	824.023	854.135	858.628	878.58	840.428	809.081
54140	chr10-530	chr10	122448898	122449168	+	11.7	0.71	exon (NM_016847, exon 1 of 2)	exon (NM_016847, exon 1 of 2)	534	NM_016847	Mm.4351	NM_016847	ENSMUSG00000020123	Avpr1a	AVPR|Avpr1|V1a|V1aR	arginine vasopressin receptor 1A	protein-coding	Avpr1a	10366707	1	1	20	8.83333	0.00880662	54.7771	53.1707	55.1715	51.5997	53.3723	51.5296
11637	chr4-346	chr4	128993242	128993512	+	14.6	0.581	exon (NM_016895, exon 1 of 7)	exon (NM_016895, exon 1 of 7)	153	NM_016895	Mm.29460	NM_016895	ENSMUSG00000028792	Ak2	Ak-2|D4Ertd220e	adenylate kinase 2	protein-coding	Ak2	10508382	0.608446	0.10647	12	2	0.139265	200.31	216.189	186.782	201.461	194.761	204.774
53599	chr10-361	chr10	41519550	41519820	+	17.5	0.65	exon (NM_016898, exon 1 of 6)	exon (NM_016898, exon 1 of 6)	185	NM_016898	Mm.269815	NM_016898	ENSMUSG00000019818	Cd164	A115|A24|AA589639|AW540279|MGC-24|MSSP	CD164 antigen	protein-coding	Cd164	10362803	1	1	20	5.5	0	3321.23	3349.2	3055.09	3441.93	3346.65	3326.76
53895	chr17-52	chr17	56990300	56990570	+	25.5	0.695	exon (NM_017393, exon 1 of 6)	exon (NM_017393, exon 1 of 6)	171	NM_017393	Mm.287892	NM_017393	ENSMUSG00000002660	Clpp	AU019820|D17Wsu160e	caseinolytic mitochondrial matrix peptidase proteolytic subunit	protein-coding	Clpp	10446207	0.994691	0.269008	12	5.5	0.0159771	496.972	504.004	503.783	529.109	493.224	473.848
53975	chr3-204	chr3	105687208	105687478	+	14.6	0.6	exon (NM_017397, exon 1 of 11)	exon (NM_017397, exon 1 of 11)	228	NM_017397	Mm.272826	NM_017397	ENSMUSG00000027905	Ddx20	GEMIN3|dp103	DEAD (Asp-Glu-Ala-Asp) box polypeptide 20	protein-coding	Ddx20	10500960	1	1	20	11.1667	0.0208471	169.874	165.317	180.026	173.358	205.906	184.072
54394	chr11-1000	chr11	80080682	80080952	+	13.1	0.537	exon (NM_018776, exon 1 of 8)	exon (NM_018776, exon 1 of 8)	174	NM_001277106	Mm.272093	NM_018776	ENSMUSG00000017561	Crlf3	BB164954|Creme9|Cytor4	cytokine receptor-like factor 3	protein-coding	Crlf3	10388996	0.922182	0.232281	24	5	0.088056	6.89105	7.56008	7.22595	7.15054	7.09876	6.98556
54411	chrX-30	chrX	74297165	74297435	+	16	0.758	exon (NM_018794, exon 1 of 10)	exon (NM_018794, exon 1 of 10)	203	NM_018794	Mm.21961	NM_018794	ENSMUSG00000019087	Atp6ap1	16A|AC45|AI316502|AW108110|Atp6ip1|Atp6s1|C7-1|CF2|VATPS1|XAP-3|mFLJ00383	ATPase, H+ transporting, lysosomal accessory protein 1	protein-coding	Atp6ap1	10600377	1	1	20	11.1667	0.0336504	1380.43	1397.86	1450.16	1450.87	1436.76	1373.65
55989	chr1-721	chr1	59685075	59685345	+	11.7	0.815	exon (NM_018868, exon 1 of 15)	exon (NM_018868, exon 1 of 15)	204	NM_018868	Mm.220367	NM_018868	ENSMUSG00000026020	Nop58	MSSP|Nol5|SIK|nop5	NOP58 ribonucleoprotein	protein-coding	Nop58	10346634	0.460888	0.0641441	24	14	0.283005	88.8734	94.8345	95.0477	144.663	131.317	119.16
56012	chr11-70	chr11	5803551	5803821	+	31.3	0.689	exon (NM_018870, exon 1 of 3)	exon (NM_018870, exon 1 of 3)	110	NM_018870	Mm.219627	NM_018870	ENSMUSG00000020475	Pgam2	-	phosphoglycerate mutase 2	protein-coding	Pgam2	10384015	1	0.785093	12	10	0.0922067	4616.87	4087.49	4141.97	3917.45	4077.3	4100.55
56009	chr1-556	chr1	171504045	171504315	+	13.9	0.667	exon (NM_019484, exon 1 of 1)	exon (NM_019484, exon 1 of 1)	702	NM_019484	Mm.389208	NM_019484	ENSMUSG00000060244	Alyref2	C130042O11Rik|REF2|Refbp2	Aly/REF export factor 2	protein-coding	Alyref2	10351636	0.786454	0.171619	12	0	0	72.8981	68.0055	80.1139	74.8235	65.4254	68.1986
17957	chr2-137	chr2	148732134	148732404	+	21.9	0.74	exon (NM_019632, exon 1 of 11)	exon (NM_019632, exon 1 of 11)	151	NM_019632	Mm.274308	NM_019632	ENSMUSG00000027438	Napb	Brp14|E161|I47|SNARE|b-SNAP	N-ethylmaleimide sensitive fusion protein attachment protein beta	protein-coding	Napb	10488387	1	1	20	11.5	0.021588	276.072	246.768	259.002	271.975	254.17	292.159
56307	chr10-204	chr10	93889418	93889688	+	16.8	0.579	exon (NM_019648, exon 2 of 12)	exon (NM_019648, exon 2 of 12)	1649	NM_019648	Mm.289329	NM_019648	ENSMUSG00000036112	Metap2	4930584B20Rik|A930035J23Rik|AI047573|AL024412|AU014659|Amp2|Mnpep|p67|p67eIF2	methionine aminopeptidase 2	protein-coding	Metap2	10371987	1	1	20	8.5	0.0268779	1271.4	1214.71	1303.79	1296.4	1376.7	1276.7
56456	chr3-86	chr3	32708721	32708991	+	18.2	0.529	exon (NM_019673, exon 1 of 14)	exon (NM_019673, exon 1 of 14)	310	NM_019673	Mm.41077	NM_019673	ENSMUSG00000027671	Actl6a	2810432C06Rik|AI851094|ARP4|Actl6|Baf53a|C79802	actin-like 6A	protein-coding	Actl6a	10491385	0.786454	0.171619	24	12.5	0.111189	449.919	488.871	569.862	559.32	534.316	528.636
56473	chr19-278	chr19	10101104	10101374	+	13.9	0.59	exon (NM_019699, exon 1 of 12)	exon (NM_019699, exon 1 of 12)	264	NM_019699	Mm.38901	NM_019699	ENSMUSG00000024665	Fads2	2900042M13Rik|Fadsd2	fatty acid desaturase 2	protein-coding	Fads2	10465895	1	0.536501	24	8	0.146258	249.174	265.917	302.722	308.939	230.399	224.489
56330	chr7-487	chr7	35647215	35647485	+	13.1	0.59	exon (NM_019746, exon 1 of 6)	exon (NM_019746, exon 1 of 6)	132	NM_019746	Mm.371609	NM_019746	ENSMUSG00000030417	Pdcd5	2200003D22Rik|AA408513|Tfar19	programmed cell death 5	protein-coding	Pdcd5	10360983	1	1	20	7.83333	0.00532687	3163.71	3212.1	3241.85	3156.26	3229.51	3382.56
18457	chr2-428	chr2	122738545	122738815	+	16	0.622	exon (NM_019788, exon 1 of 5)	exon (NM_019788, exon 1 of 5)	175	NM_019788	Mm.268921	NM_019788	ENSMUSG00000005804	Bloc1s6	BLOC-1|Pldn|Stx13bp1|pa	biogenesis of lysosomal organelles complex-1, subunit 6, pallidin	protein-coding	Pldn	10475525	1	0.693388	12	9.5	0.0815153	7.56583	7.46387	7.63831	7.70496	7.65966	7.78923
56491	chr2-145	chr2	173737575	173737845	+	21.1	0.529	exon (NM_019806, exon 1 of 6)	exon (NM_019806, exon 1 of 6)	139	NM_019806	Mm.260456	NM_019806	ENSMUSG00000054455	Vapb	AI225786|AI840687|AI848259|D2Abb2e|R75548|VAP33b|Vamp33b	vesicle-associated membrane protein, associated protein B and C	protein-coding	Vapb	10479077	0.994691	0.269008	12	0	0.0237871	994.722	974.157	988.989	1010.99	985.997	980.029
56709	chr10-22	chr10	59879624	59879894	+	34.3	0.651	exon (NM_019965, exon 1 of 9)	exon (NM_019965, exon 1 of 9)	168	NM_019965	Mm.103610	NM_019965	ENSMUSG00000020109	Dnajb12	Dj10|mDj10	DnaJ heat shock protein family (Hsp40) member B12	protein-coding	Dnajb12	10363392	0.922182	0.232281	12	1	0.0959897	577.209	559.312	525.374	569.922	522.762	569.523
56541	chr13-570	chr13	64161882	64162152	+	10.9	0.667	exon (NM_019986, exon 1 of 8)	exon (NM_019986, exon 1 of 8)	151	NM_019986	Mm.40989	NM_019986	ENSMUSG00000021476	Habp4	4933413D03Rik|4933428J01Rik	hyaluronic acid binding protein 4	protein-coding	Habp4	10405811	1	1	20	9.16667	0.0281318	310.33	276.694	321.178	297.87	292.218	315.995
56700	chr3-268	chr3	88325019	88325289	+	13.9	0.632	exon (NM_020003, exon 1 of 6)	exon (NM_020003, exon 1 of 6)	131	NM_020003	Mm.439922	NM_020003	ENSMUSG00000001418	Glmp	0610031J06Rik|AB027141|NCU-G1	glycosylated lysosomal membrane protein	protein-coding	0610031J06Rik	10493203	1	0.357622	12	9	0.0340613	8.34217	8.35686	8.40976	8.29168	8.34463	8.40192
19718	chr5-632	chr5	134582672	134582942	+	13.1	0.643	exon (NM_020022, exon 1 of 11)	exon (NM_020022, exon 1 of 11)	117	NM_020022	Mm.332739	NM_020022	ENSMUSG00000023104	Rfc2	2610008M13Rik|40kDa|AI326953|Recc2	replication factor C (activator 1) 2	protein-coding	Rfc2	10526217	1	0.410551	12	1	0.0550483	101.866	86.6429	89.5958	90.6007	84.4198	78.4146
57028	chr15-103	chr15	78914040	78914310	+	19.7	0.682	exon (NM_020271, exon 1 of 2)	exon (NM_020271, exon 1 of 2)	256	NM_020271	Mm.263169	NM_020271	ENSMUSG00000022436	Pdxp	1600027H05Rik|AB041662|PLPP	pyridoxal (pyridoxine, vitamin B6) phosphatase	protein-coding	Pdxp	10425158	1	0.536501	24	9	0.044279	47.9883	47.3033	46.3674	48.1055	51.6791	45.2941
22169	chr12-539	chr12	26469669	26469939	+	10.9	0.64	exon (NM_020557, exon 1 of 5)	exon (NM_020557, exon 1 of 5)	589	NM_020557	Mm.271839	NM_020557	ENSMUSG00000020638	Cmpk2	1200004E04Rik|TDKI|Tyki	cytidine monophosphate (UMP-CMP) kinase 2, mitochondrial	protein-coding	Cmpk2	10395039	0.922182	0.232281	24	2	0.0836154	50.0209	49.7802	47.5028	45.2178	46.9118	48.4871
57342	chr7-1132	chr7	112427937	112428207	+	11.7	0.594	exon (NM_020606, exon 1 of 13)	exon (NM_020606, exon 1 of 13)	366	NM_020606	Mm.143763	NM_020606	ENSMUSG00000030770	Parva	2010012A22Rik|5430400F08Rik|AI225929|AU042898|Actp|CH-ILKBP|Parvin	parvin, alpha	protein-coding	Parva	10556426	0.0833197	0.00389482	24	10	0.127753	218.406	251.613	257.126	260.61	228.692	216.824
57357	chr5-108	chr5	76140327	76140597	+	21.1	0.673	exon (NM_020611, exon 1 of 6)	exon (NM_020611, exon 1 of 6)	189	NM_020611	Mm.289446	NM_020611	ENSMUSG00000029233	Srd5a3	1110025P14Rik|A430076C09|AV364670|AW987574|D730040M03Rik|H5ar|S5AR 3|Srd5a2l	steroid 5 alpha-reductase 3	protein-coding	Srd5a3	10522589	1	0.693388	24	8.5	0.133392	133.05	180.032	147.442	187.732	159.296	141.411
21898	chr4-1552	chr4	66827713	66827983	+	10.2	0.72	exon (NM_021297, exon 1 of 3)	exon (NM_021297, exon 1 of 3)	297	NM_021297	Mm.38049	NM_021297	ENSMUSG00000039005	Tlr4	Lps|Ly87|Ran/M1|Rasl2-8	toll-like receptor 4	protein-coding	Tlr4	10505517	1	1	20	7.83333	0	55.2097	67.3352	61.1089	72.1796	56.728	60.8958
57874	chr9-128	chr9	65021331	65021601	+	20.4	0.723	exon (NM_021345, exon 1 of 11)	exon (NM_021345, exon 1 of 11)	251	NM_021345	Mm.308180	NM_021345	ENSMUSG00000033629	Hacd3	4930523M17Rik|AW742319|B-ind1|Hcad3|Hspc121|Ptplad1	3-hydroxyacyl-CoA dehydratase 3	protein-coding	Ptplad1	10594501	1	0.410551	24	4	0	7.8698	7.97882	7.94356	7.98575	7.78074	8.09546
58202	chr2-235	chr2	25211176	25211446	+	19.7	0.721	exon (NM_021393, exon 1 of 13)	exon (NM_021393, exon 1 of 13)	178	NM_001310157	Mm.116418	NM_021393	ENSMUSG00000013465	Nelfb	A730008L03Rik|AB041607|AI663983|Cobra1|Nelf-b	negative elongation factor complex member B	protein-coding	Cobra1	10480605	1	1	20	6.83333	0.0184413	7.46583	7.44357	7.26595	7.42182	7.31945	7.36409
59008	chr5-90	chr5	122820915	122821185	+	24.1	0.735	exon (NM_021505, exon 1 of 17)	exon (NM_021505, exon 1 of 17)	292	NM_021505	Mm.332667	NM_021505	ENSMUSG00000029472	Anapc5	2510006G12Rik|AA408751|AA536819|AA986414|APC5|Anpc5	anaphase-promoting complex subunit 5	protein-coding	Anapc5	10533549	1	1	20	12.5	0.0387259	2692.26	2599.65	2353.02	2481.68	2582.23	2664.78
59033	chr15-394	chr15	100761835	100762105	+	13.1	0.714	exon (NM_021530, exon 1 of 25)	exon (NM_021530, exon 1 of 25)	223	NM_021530	Mm.209856	NM_021530	ENSMUSG00000023032	Slc4a8	AW493845|C230026C11|NDCBE|kNBC-3	solute carrier family 4 (anion exchanger), member 8	protein-coding	Slc4a8	10426924	0.994691	0.269008	24	15	0.0535987	83.2818	74.4118	88.6065	87.9572	81.0146	85.01
59036	chr12-298	chr12	71310119	71310389	+	15.3	0.684	exon (NM_021532, exon 1 of 4)	exon (NM_021532, exon 1 of 4)	370	NM_021532	Mm.46662	NM_021532	ENSMUSG00000044548	Dact1	4921528D17Rik|AI115603|DAPPER|DAPPER1|FRODO|Frd1|Frodo1|MDpr1|MTNG3|THYEX3	dishevelled-binding antagonist of beta-catenin 1	protein-coding	Dact1	10396270	1	0.469977	12	1	0.0687449	102.042	93.0194	91.0887	91.7668	99.7344	82.9805
74255	chr4-102	chr4	40757649	40757919	+	20.4	0.621	exon (NM_021535, exon 1 of 12)	exon (NM_021535, exon 1 of 12)	101	NM_021535	Mm.289929	NM_021535	ENSMUSG00000028409	Smu1	2600001O03Rik|2610203K23Rik|AB044414|AI845086|AW556129|Bwd	smu-1 suppressor of mec-8 and unc-52 homolog (C. elegans)	protein-coding	Smu1	10512111	1	0.357622	24	14.5	0.0420552	347.141	315.118	350.925	355.873	382.035	376.921
59053	chr15-212	chr15	76368926	76369196	+	17.5	0.509	exon (NM_021555, exon 1 of 6)	exon (NM_021555, exon 1 of 6)	163	NM_021555	Mm.133202	NM_021555	ENSMUSG00000022554	Hgh1	Brp16|D15Ertd741e|Fam203a|MNCb-5873	HGH1 homolog	protein-coding	Fam203a	10424853	1	1	20	8.83333	0.0391824	6.52537	6.11768	6.36801	6.37828	6.31212	6.18999
59054	chr13-378	chr13	118387001	118387271	+	11.7	0.514	exon (NM_021556, exon 1 of 5)	exon (NM_021556, exon 1 of 5)	116	NM_021556	Mm.143810	NM_021556	ENSMUSG00000021731	Mrps30	2610020A16Rik|AA968347|PAP|Pdcd9	mitochondrial ribosomal protein S30	protein-coding	Mrps30	10412385	0.786454	0.171619	12	1	0.178778	83.7397	81.6318	90.7886	97.162	88.136	85.5129
64074	chr17-1089	chr17	14279605	14279875	+	10.2	0.583	exon (NM_022315, exon 1 of 13)	exon (NM_022315, exon 1 of 13)	234	NM_022315	Mm.30162	NM_022315	ENSMUSG00000023886	Smoc2	1700056C05Rik|5430426J21Rik|Smoc2l	SPARC related modular calcium binding 2	protein-coding	Smoc2	10441902	1	0.31062	18	5	0.0122117	547.069	541.719	537.63	543.151	543.69	476.017
64707	chr2-415	chr2	3474635	3474905	+	13.9	0.711	exon (NM_022724, exon 1 of 6)	exon (NM_022724, exon 1 of 6)	216	NR_027509	Mm.23483	NM_022724	ENSMUSG00000026646	Suv39h2	4930507K23Rik|AA536750|D030054H19Rik|D2Ertd544e|KMT1B	suppressor of variegation 3-9 homolog 2 (Drosophila)	protein-coding	Suv39h2	10479765	1	1	20	13.1667	0.0264969	4.99025	4.78122	4.95925	4.81949	4.87746	4.98527
64424	chr4-542	chr4	45018612	45018882	+	13.1	0.625	exon (NM_022811, exon 1 of 12)	exon (NM_022811, exon 1 of 12)	138	NM_022811	Mm.282932	NM_022811	ENSMUSG00000028318	Polr1e	53kDa|AU042259|D030019D19Rik|Paf53|Praf1	polymerase (RNA) I polypeptide E	protein-coding	Polr1e	10504518	1	1	20	10.5	0	70.2682	59.6831	61.7086	60.7196	58.9271	61.2514
64817	chr4-676	chr4	58206177	58206447	+	13.1	0.6	exon (NM_022814, exon 1 of 48)	exon (NM_022814, exon 1 of 48)	284	NM_022814	Mm.261024	NM_022814	ENSMUSG00000028369	Svep1	1110021D17Rik|4833413O10Rik|AA387071|D430029O09Rik|Polydom	sushi, von Willebrand factor type A, EGF and pentraxin domain containing 1	protein-coding	Svep1	10513208	1	0.998554	24	13.5	0.0304551	251.927	298.838	284.989	270.359	262.099	269.857
69048	chr13-81	chr13	100833021	100833291	+	19.7	0.589	exon (NM_022885, exon 1 of 16)	exon (NM_022885, exon 1 of 16)	271	NM_022885	Mm.402215	NM_022885	ENSMUSG00000021629	Slc30a5	1810010K08Rik|AF233321|ZNT5|ZTL1|ZnT-5|Zntl1	solute carrier family 30 (zinc transporter), member 5	protein-coding	Slc30a5	10411751	1	1	20	8.16667	0.013193	183.057	213.13	195.073	212.247	206.044	216.473
65100	chr14-572	chr14	122464233	122464503	+	8.75	0.833	exon (NM_022987, exon 1 of 2)	exon (NM_022987, exon 1 of 2)	1290	NM_022987	Mm.390761	NM_022987	ENSMUSG00000041703	Zic5	1700049L20Rik|Opr	zinc finger protein of the cerebellum 5	protein-coding	Zic5	10376241	1	0.289814	12	7.5	0.13277	39.1109	34.2338	40.6657	32.086	38.0955	35.5584
65961	chr5-291	chr5	88554697	88554967	+	16	0.739	exon (NM_023054, exon 1 of 1)	exon (NM_023054, exon 1 of 1)	349	NM_023054	Mm.490364	NM_023054	ENSMUSG00000070697	Utp3	2400011K09Rik|AW557551|C87704|Crl1|Crlz1|Sas10	UTP3 small subunit processome component	protein-coding	Utp3	10522973	0.786454	0.171619	12	1.5	0.129906	90.6729	87.8317	82.3211	94.891	80.5644	90.8428
80915	chr1-800	chr1	170885187	170885457	+	10.9	0.64	exon (NM_023173, exon 1 of 6)	exon (NM_023173, exon 1 of 6)	218	NM_023173	Mm.34365	NM_023173	ENSMUSG00000026659	Dusp12	1190004O14Rik|AA027408|AW049275|ENSMUSG00000045460|ESTM36|LMW-DSP4|T-DSP4|VH1|mVH1	dual specificity phosphatase 12	protein-coding	Dusp12	10351502	1	1	20	13.5	0.00829436	64.2756	52.1874	55.6489	54.9246	60.6733	58.1614
56215	chr14-9	chr14	54686453	54686723	+	40.1	0.559	exon (NM_023190, exon 1 of 19)	exon (NM_023190, exon 1 of 19)	343	NM_001085473	Mm.297078	NM_019567	ENSMUSG00000022185	Acin1	2610036I19Rik|2610510L13Rik|Acinus|Acn|C79325|acinusL|acinusS|mKIAA0670	apoptotic chromatin condensation inducer 1	protein-coding	Acin1	10419825	0.34014	0.0374712	24	6	0.0653862	8.41247	8.47537	8.50697	8.48821	8.22387	8.38305
66647	chr7-726	chr7	64872538	64872808	+	11.7	0.645	exon (NM_023239, exon 1 of 1)	exon (NM_023239, exon 1 of 1)	367	NM_023239	Mm.19944	NM_023239	ENSMUSG00000070520	Ndnl2	5730494G16Rik|AI642138|BB044375|HCA4|Mageg1|Nsmce3|mage-g1	necdin-like 2	protein-coding	Ndnl2	10564337	1	1	20	8.5	0.0158667	140.906	130.775	150.785	141.31	137.07	144.86
224020	chr16-177	chr16	17406073	17406343	+	16.8	0.63	exon (NM_023348, exon 1 of 5)	exon (NM_023348, exon 1 of 5)	106	NM_001001983	Mm.5718	NM_001001983	ENSMUSG00000041720	Pi4ka	Pik4ca	phosphatidylinositol 4-kinase, catalytic, alpha polypeptide	protein-coding	Pi4ka	10438112	0.786454	0.171619	24	6	0.0419668	237.776	275.254	262.207	264.918	248.767	251.639
67943	chr7-196	chr7	83892229	83892499	+	21.1	0.576	exon (NM_023403, exon 1 of 3)	exon (NM_023403, exon 1 of 3)	364	NM_023403	Mm.117365	NM_023403	ENSMUSG00000038503	Mesdc2	2210015O11Rik|AW537813|mKIAA0081|mesd|msd	mesoderm development candidate 2	protein-coding	Mesdc2	10554704	1	0.998554	12	2.5	0	376.292	378.429	384.383	371.156	365.052	354.305
22439	chrX-118	chrX	9272890	9273160	+	9.48	0.727	exon (NM_023500, exon 1 of 3)	exon (NM_023500, exon 1 of 3)	241	NM_023500	Mm.56468	NM_023500	ENSMUSG00000015342	Xk	1810038K19Rik|XRG1|Xkh	X-linked Kx blood group	protein-coding	Xk	10598586	1	0.469977	12	1	0.16156	166.907	146.263	157.2	171.179	158.32	138.083
70078	chr13-115	chr13	43398343	43398613	+	18.2	0.551	exon (NM_023554, exon 1 of 8)	exon (NM_023554, exon 1 of 8)	102	NM_023554	Mm.439927	NM_023554	ENSMUSG00000063200	Nol7	2210008F15Rik|5730556I21Rik|NOP27|RARG-1	nucleolar protein 7	protein-coding	Nol7	10404827	1	0.610752	12	0	0.129436	271.049	215.625	253.656	251.628	250.947	262.547
71952	chr12-330	chr12	83950952	83951222	+	12.4	0.676	exon (NM_023633, exon 1 of 1)	exon (NM_023633, exon 1 of 1)	479	NM_023633	Mm.251483	NM_023633	ENSMUSG00000046791	2410016O06Rik	MAPJD|NO66	RIKEN cDNA 2410016O06 gene	protein-coding	2410016O06Rik	10397143	1	1	20	13.8333	0.0331217	45.927	40.9781	43.4153	44.2636	46.6518	43.883
77116	chr9-490	chr9	13749242	13749512	+	16.8	0.737	exon (NM_023858, exon 1 of 15)	exon (NM_023858, exon 1 of 15)	196	NM_023858	Mm.210405	NM_023858	ENSMUSG00000031918	Mtmr2	6030445P13Rik	myotubularin related protein 2	protein-coding	Mtmr2	10583215	0.0610847	0.00244254	12	1	0.10439	221.595	230.536	220.408	247.317	235.916	230.878
66290	chr4-202	chr4	63544844	63545114	+	18.2	0.609	exon (NM_024173, exon 1 of 3)	exon (NM_024173, exon 1 of 3)	214	NM_024173	Mm.371615	NM_024173	ENSMUSG00000039105	Atp6v1g1	1810024D14Rik|AA960677|ATP6J|Atp6g1|VAG1|Vma10	ATPase, H+ transporting, lysosomal V1 subunit G1	protein-coding	Atp6v1g1	10482330	1	1	20	7.16667	0.0227759	878.763	836.934	826.574	849.27	856.15	852.68
66878	chr18-135	chr18	12128833	12129103	+	16	0.744	exon (NM_024182, exon 1 of 13)	exon (NM_024182, exon 1 of 13)	118	NM_024182	Mm.28551	NM_024182	ENSMUSG00000024404	Riok3	1200013N13Rik|D18Ertd331e|E130306C24Rik|Sudd	RIO kinase 3	protein-coding	Riok3	10453900	0.304521	0.0311014	12	2	0.0882186	843.989	805.689	774.07	825.32	823.668	765.421
67819	chr15-59	chr15	57892135	57892405	+	22.6	0.515	exon (NM_024207, exon 1 of 8)	exon (NM_024207, exon 1 of 8)	148	NM_024207	Mm.289387	NM_024207	ENSMUSG00000022365	Derl1	1110021N07Rik|AI195141|AW551338|Derlin-1	Der1-like domain family, member 1	protein-coding	Derl1	10428736	1	0.536501	24	9.5	0.0469024	821.274	800.59	800.468	826.494	757.583	782.171
76916	chr16-251	chr16	38522394	38522664	+	13.1	0.488	exon (NM_024273, exon 1 of 7)	exon (NM_024273, exon 1 of 7)	134	NM_024273	Mm.132231	NM_024273	ENSMUSG00000002846	Timmdc1	2810021C21Rik|4930455C21Rik|AV135763	translocase of inner mitochondrial membrane domain containing 1	protein-coding	4930455C21Rik	10439463	0.555588	0.0902228	12	0	0.101378	9.4563	9.31293	9.40019	9.48777	9.31389	9.36375
30949	chr7-759	chr7	123378017	123378287	+	11.7	0.611	exon (NM_025304, exon 1 of 11)	exon (NM_025304, exon 1 of 11)	170	NM_025304	Mm.260527	NM_025304	ENSMUSG00000030763	Lcmt1	AL033290|LCMT-1|Lcmt	leucine carboxyl methyltransferase 1	protein-coding	Lcmt1	10557285	0.167635	0.011578	24	12	0.0394	229.61	229.978	240.301	241.199	248.494	233.933
66075	chr6-99	chr6	33059889	33060159	+	21.9	0.655	exon (NM_025336, exon 1 of 8)	exon (NM_025336, exon 1 of 8)	128	NM_025336	Mm.21501	NM_025336	ENSMUSG00000053768	Chchd3	0610041L09Rik|1700039J09Rik|AW558177	coiled-coil-helix-coiled-coil-helix domain containing 3	protein-coding	Chchd3	10543835	0.505682	0.0762022	12	1.5	0.0361685	2989.94	2897.11	2935.32	3116.26	2847.34	2910.6
22272	chr11-258	chr11	53430454	53430724	+	19.7	0.577	exon (NM_025352, exon 1 of 2)	exon (NM_025352, exon 1 of 2)	242	NM_001326614	Mm.251621	NM_025352	ENSMUSG00000044894	Uqcrq	1100001F06Rik|1500040F11Rik|5830407L17Rik|9.5kDa|AA959903|QP-C|Qpc|Uqcrb|c1502	ubiquinol-cytochrome c reductase, complex III subunit VII	protein-coding	Uqcrq	10385818	0.377948	0.044983	12	1	0.0343654	10.7711	10.6859	10.7137	10.8674	10.7783	10.5823
66155	chr1-257	chr1	171294578	171294848	+	17.5	0.568	exon (NM_025388, exon 2 of 7)	exon (NM_025388, exon 2 of 7)	269	NM_025388	Mm.2815	NM_025388	ENSMUSG00000062963	Ufc1	1110021H02Rik|AA062310|ESTM29	ubiquitin-fold modifier conjugating enzyme 1	protein-coding	Ufc1	10360120	1	0.65207	12	0	0.0188868	755.711	657.064	666.583	702.517	696.853	722.889
66253	chr10-568	chr10	13868516	13868786	+	13.1	0.677	exon (NM_025446, exon 1 of 6)	exon (NM_025446, exon 1 of 6)	306	NM_025446	Mm.45755	NM_025446	ENSMUSG00000019806	Aig1	1500031O19Rik|AV064870|AW413422|CGI-103	androgen-induced 1	protein-coding	Aig1	10367973	0.146865	0.00939007	24	11	0.121637	140.241	144.156	146.593	164.383	141.708	128.922
66302	chr4-308	chr4	19575161	19575431	+	16	0.523	exon (NM_025476, exon 1 of 10)	exon (NM_025476, exon 1 of 10)	230	NM_025476	Mm.440686	NM_025476	ENSMUSG00000028229	Rmdn1	Fam82b|RMD-1	regulator of microtubule dynamics 1	protein-coding	Fam82b	10503484	0.0712878	0.00309146	24	13	0.110853	7.80461	7.75399	7.8818	8.07512	7.91076	7.85952
66362	chr4-756	chr4	45320276	45320546	+	10.2	0.688	exon (NM_025513, exon 1 of 4)	exon (NM_025513, exon 1 of 4)	192	NM_025513	Mm.275788	NM_025513	ENSMUSG00000028322	Exosc3	2310005D06Rik|AI593501|Rrp40	exosome component 3	protein-coding	Exosc3	10504562	1	1	20	13.5	0.00121072	45.117	40.0253	40.1606	39.0849	39.9959	44.8088
66375	chr12-279	chr12	72664497	72664767	+	14.6	0.6	exon (NM_025522, exon 1 of 7)	exon (NM_025522, exon 1 of 7)	196	NM_025522	Mm.289653	NM_025522	ENSMUSG00000021094	Dhrs7	2310016E22Rik|5730564L20Rik|AW061210|Retdsr4|Retsdr4	dehydrogenase/reductase (SDR family) member 7	protein-coding	Dhrs7	10400941	0.608446	0.10647	12	0	0.0157968	171.245	192.991	168.614	183.142	168.105	176.693
66381	chr12-819	chr12	84417272	84417542	+	8.75	0.778	exon (NM_025525, exon 1 of 1)	exon (NM_025525, exon 1 of 1)	207	NM_025525	Mm.24846	NM_025525	ENSMUSG00000098134	Rnf113a2	2310020H19Rik|AI426758|Rnf113a	ring finger protein 113A2	protein-coding	Rnf113a2	10397244	1	1	20	10.5	0.0141948	108.484	117.901	104.124	115.451	117.597	117.653
66400	chr17-405	chr17	56997364	56997634	+	16.8	0.604	exon (NM_025538, exon 1 of 4)	exon (NM_025538, exon 1 of 4)	160	NM_025538	Mm.196150	NM_025538	ENSMUSG00000002661	Alkbh7	2310045B01Rik|2510008E23Rik|Abh7|Spata11	alkB homolog 7	protein-coding	Alkbh7	10446214	0.723213	0.146835	24	12	0.1055	140.041	120.715	157.535	174.001	134.501	138.797
66407	chr4-243	chr4	126046990	126047260	+	15.3	0.643	exon (NM_025544, exon 1 of 8)	exon (NM_025544, exon 1 of 8)	197	NM_025544	Mm.195628	NM_025544	ENSMUSG00000028861	Mrps15	1500003E24Rik|2410002B11Rik|Mprs15	mitochondrial ribosomal protein S15	protein-coding	Mrps15	10508089	1	0.886572	12	0	0	1310.5	1212.02	1229.96	1285.58	1254.94	1219.01
66413	chr14-338	chr14	14120659	14120929	+	11.7	0.643	exon (NM_025550, exon 1 of 8)	exon (NM_025550, exon 1 of 8)	110	NM_025550	Mm.27591	NM_025550	ENSMUSG00000021737	Psmd6	2400006A19Rik	proteasome (prosome, macropain) 26S subunit, non-ATPase, 6	protein-coding	Psmd6	10417689	1	0.469977	12	3	0.0725492	1865.96	1779.18	1737.86	1916.29	1862.98	1859.89
66448	chr4-225	chr4	155803588	155803858	+	16	0.592	exon (NM_025570, exon 1 of 4)	exon (NM_025570, exon 1 of 4)	105	NM_025570	Mm.23825	NM_025570	ENSMUSG00000029066	Mrpl20	2610008D01Rik|4930425I20Rik	mitochondrial ribosomal protein L20	protein-coding	Mrpl20	10511149	1	0.785093	24	10	0.0723441	209.123	199.973	200.302	215.78	182.84	193.962
66459	chr6-668	chr6	57691738	57692008	+	11.7	0.605	exon (NM_025574, exon 1 of 2)	exon (NM_025574, exon 1 of 2)	205	NM_025574	Mm.44201	NM_025574	ENSMUSG00000043162	Pyurf	2610022G08Rik|AI847956|Prey	Pigy upstream reading frame	protein-coding	Pigy	10545009	1	1	20	8.16667	0.016804	8.00322	7.88054	7.89181	8.09367	7.87119	7.96649
66497	chr16-304	chr16	57606559	57606829	+	13.1	0.8	exon (NM_025599, exon 1 of 10)	exon (NM_025599, exon 1 of 10)	173	NM_025599	Mm.425976	NM_025599	ENSMUSG00000022748	Cmss1	1110001A06Rik|2610528E23Rik|4930572F24Rik|AV099812|AV122629	cms small ribosomal subunit 1	protein-coding	2610528E23Rik	10440077	1	0.886572	12	1	0.133452	8.59251	8.32963	8.32502	8.38295	8.42405	8.48319
66588	chr4-331	chr4	114986990	114987260	+	15.3	0.533	exon (NM_025647, exon 1 of 6)	exon (NM_025647, exon 1 of 6)	103	NM_025647	Mm.294159	NM_025647	ENSMUSG00000028719	Cmpk1	0610011D08Rik|CK|Cmpk|UMP-CMPk	cytidine monophosphate (UMP-CMP) kinase 1	protein-coding	Cmpk1	10515164	1	0.998554	12	2	0.112331	344.937	408.579	365.977	428.218	396.21	383.816
66603	chr12-208	chr12	59013378	59013648	+	15.3	0.647	exon (NM_025656, exon 1 of 10)	exon (NM_025656, exon 1 of 10)	122	NM_025656	Mm.35353	NM_025656	ENSMUSG00000060121	Gemin2	Sip1|gemin-2	gem (nuclear organelle) associated protein 2	protein-coding	Sip1	10395893	1	1	20	10.5	0.0101572	6.7044	6.72922	6.7307	6.7496	6.76292	6.83432
66629	chr15-175	chr15	12321604	12321874	+	16.8	0.667	exon (NM_025673, exon 1 of 4)	exon (NM_025673, exon 1 of 4)	243	NM_025673	Mm.157655	NM_025673	ENSMUSG00000022200	Golph3	4733401N08Rik|5730410D03Rik|AW413496	golgi phosphoprotein 3	protein-coding	Golph3	10423172	1	0.886572	12	0	0.0926663	656.299	579.374	610.095	599.892	601.683	636.74
66637	chr1-545	chr1	152386435	152386705	+	12.4	0.75	exon (NM_025677, exon 1 of 5)	exon (NM_025677, exon 1 of 5)	112	NM_025677	Mm.379120	NM_025677	ENSMUSG00000014980	Tsen15	5730449L18Rik|AL023077|Sen15	tRNA splicing endonuclease subunit 15	protein-coding	Tsen15	10358726	1	1	20	8.83333	0.0231232	207.222	229.911	241.368	245.589	236.003	232.125
66642	chr2-859	chr2	157737421	157737691	+	13.1	0.559	exon (NM_025680, exon 1 of 16)	exon (NM_025680, exon 1 of 16)	155	NM_025680	Mm.45193	NM_025680	ENSMUSG00000027649	Ctnnbl1	5730471K09Rik|NAP|NYD-SP19|P14L	catenin, beta like 1	protein-coding	Ctnnbl1	10477994	0.922182	0.232281	12	1	0.0055225	99.9462	92.3257	94.4317	94.3702	94.9957	90.2985
66645	chr14-225	chr14	56778012	56778282	+	13.1	0.542	exon (NM_025682, exon 1 of 9)	exon (NM_025682, exon 1 of 9)	169	NM_025682	Mm.20129	NM_025682	ENSMUSG00000021938	Pspc1	5730470C09Rik|AI327109|AI449052|PSP1	paraspeckle protein 1	protein-coding	Pspc1	10420338	0.922182	0.232281	24	11	0.0641841	167.596	195.095	195.28	218.782	194.25	191.691
66653	chr8-997	chr8	27128318	27128588	+	10.9	0.586	exon (NM_025686, exon 1 of 4)	exon (NM_025686, exon 1 of 4)	179	NM_025686	Mm.334467	NM_025686	ENSMUSG00000031487	Brf2	2700059M06Rik|5730512K07Rik|AU018504|AU022602|BRFU|TFIIIB50	BRF2, RNA polymerase III transcription initiation factor 50kDa subunit	protein-coding	Brf2	10577948	1	0.998554	12	10.5	0.0973474	104.731	105.719	112.271	114.454	119.462	132.693
66725	chr15-602	chr15	91673190	91673460	+	11.7	0.654	exon (NM_025730, exon 1 of 51)	exon (NM_025730, exon 1 of 51)	101	NM_025730	Mm.37558	NM_025730	ENSMUSG00000036273	Lrrk2	4921513O20Rik|9330188B09Rik|AW561911|D630001M17Rik|Gm927|cI-46	leucine-rich repeat kinase 2	protein-coding	Lrrk2	10426315	0.418067	0.0538095	24	5	0.0868822	133.868	161.127	152.861	147.431	143.74	145.127
66868	chr3-43	chr3	67582742	67583012	+	24.8	0.776	exon (NM_025813, exon 1 of 16)	exon (NM_025813, exon 1 of 16)	109	NM_025813	Mm.491153	NM_025813	ENSMUSG00000027775	Mfsd1	1200003O06Rik	major facilitator superfamily domain containing 1	protein-coding	Mfsd1	10492499	1	0.536501	12	2	0.0698834	457.536	489.977	426.99	460.587	526.905	455.567
66874	chr11-706	chr11	73047901	73048171	+	13.9	0.583	exon (NM_025818, exon 1 of 13)	exon (NM_025818, exon 1 of 13)	169	NM_025818	Mm.41903	NM_025818	ENSMUSG00000020783	Ncbp3	1200014J11Rik|C130061O14Rik|C78393	nuclear cap binding subunit 3	protein-coding	1200014J11Rik	10378271	1	1	20	8.5	0.0194439	7.25335	7.41618	7.23615	7.36403	7.4644	7.45396
66887	chr8-646	chr8	86624184	86624454	+	10.9	0.571	exon (NM_025827, exon 1 of 15)	exon (NM_025827, exon 1 of 15)	276	NM_025827	Mm.324550	NM_025827	ENSMUSG00000047866	Lonp2	1300002A08Rik|AU015403|Lonp	lon peptidase 2, peroxisomal	protein-coding	Lonp2	10573675	1	0.469977	12	1	0.0733765	589.44	618.097	593.757	596.484	614.965	597.858
66913	chr5-467	chr5	143403853	143404123	+	14.6	0.545	exon (NM_025841, exon 1 of 5)	exon (NM_025841, exon 1 of 5)	168	NM_025841	Mm.181880	NM_025841	ENSMUSG00000079111	Kdelr2	1110007A14Rik	KDEL (Lys-Asp-Glu-Leu) endoplasmic reticulum protein retention receptor 2	protein-coding	Kdelr2	10608708	1	1	20	8.83333	0.0393034	9.6207	9.75473	9.84836	9.78839	9.71076	9.74965
66921	chr3-315	chr3	108911131	108911401	+	16	0.667	exon (NM_025845, exon 1 of 6)	exon (NM_025845, exon 1 of 6)	438	NM_025845	Mm.51049	NM_025845	ENSMUSG00000027881	Prpf38b	1110021E09Rik|AU018955	PRP38 pre-mRNA processing factor 38 (yeast) domain containing B	protein-coding	Prpf38b	10501447	1	0.693388	24	7	0.114021	181.399	232.673	189.56	223.964	201.429	193.755
66928	chr4-953	chr4	75278001	75278271	+	10.9	0.581	exon (NM_025849, exon 1 of 2)	exon (NM_025849, exon 1 of 2)	150	NM_025849	Mm.24332	NM_025849	ENSMUSG00000028398	Tmem261	1700027K24Rik|3110001D03Rik	transmembrane protein 261	protein-coding	3110001D03Rik	10513952	1	1	20	8.5	0.0474524	9.38455	9.3617	9.56345	9.48674	9.51436	9.36771
29812	chr2-323	chr2	156996640	156996910	+	16.8	0.781	exon (NM_025853, exon 10 of 11)	exon (NM_025853, exon 10 of 11)	-4664	NM_180956	Mm.279256	NM_013865	ENSMUSG00000027634	Ndrg3	4833415O14Rik|AI747193|Ndr3	N-myc downstream regulated gene 3	protein-coding	Ndrg3	10489065	0.555588	0.0902228	12	0	0.0176494	9.48932	9.49036	9.402	9.53834	9.45383	9.50135
66962	chr9-234	chr9	21955727	21955997	+	18.2	0.707	exon (NM_025870, exon 1 of 2)	exon (NM_025870, exon 1 of 2)	109	NM_025870	Mm.46647	NM_025870	ENSMUSG00000051238	Swsap1	2310047B19Rik	SWIM type zinc finger 7 associated protein 1	protein-coding	2310047B19Rik	10583785	1	1	20	10.8333	0.0232811	6.39692	6.45031	6.52895	6.45586	6.34703	6.63751
66999	chr5-599	chr5	45520300	45520570	+	13.1	0.641	exon (NM_025895, exon 1 of 4)	exon (NM_025895, exon 1 of 4)	206	NM_025895	Mm.283045	NM_025895	ENSMUSG00000015804	Med28	1500003D12Rik|AI451633|AU045690|Eg1|FKSG20|magicin	mediator complex subunit 28	protein-coding	Med28	10521725	1	0.357622	24	11	0	241.145	239.183	228.792	238.554	238.954	225.825
67043	chrX-173	chrX	162888140	162888410	+	9.48	0.615	exon (NM_025932, exon 1 of 9)	exon (NM_025932, exon 1 of 9)	187	NM_025932	Mm.44207	NM_025932	ENSMUSG00000031357	Syap1	2010110O17Rik|AW011796	synapse associated protein 1	protein-coding	Syap1	10607694	1	1	20	13.1667	0.0124192	557.42	556.57	625.727	591.211	569.618	612.765
67063	chr4-81	chr4	49586956	49587226	+	22.6	0.837	exon (NM_025944, exon 2 of 2)	exon (NM_025944, exon 2 of 2)	10779	NM_025944	Mm.490285	NM_025944	ENSMUSG00000039611	Tmem246	2810432L12Rik|9330170P15Rik|AI835809	transmembrane protein 246	protein-coding	Tmem246	10512915	1	1	20	5.5	0.041405	124.457	118.434	140.83	147.499	115.188	127.623
67072	chr19-209	chr19	28990433	28990703	+	15.3	0.556	exon (NM_025950, exon 1 of 7)	exon (NM_025950, exon 1 of 7)	216	NM_025950	Mm.78875	NM_025950	ENSMUSG00000024780	Cdc37l1	2700033A15Rik|BB159850|Cdc37l|Harc	cell division cycle 37-like 1	protein-coding	Cdc37l1	10462333	0.215927	0.0173912	12	2	0.107848	457.853	456.484	408.984	502.636	427.695	420.87
67073	chr5-368	chr5	52741659	52741929	+	16	0.781	exon (NM_025951, exon 1 of 10)	exon (NM_025951, exon 1 of 10)	220	NM_028744	Mm.248647	NM_025951	ENSMUSG00000029186	Pi4k2b	2610042N09Rik|4933409G22Rik	phosphatidylinositol 4-kinase type 2 beta	protein-coding	Pi4k2b	10521832	1	1	20	7.83333	0	5.11364	5.18217	5.26744	5.23861	5.24991	5.26475
67138	chr6-730	chr6	57581072	57581342	+	10.9	0.95	exon (NM_025992, exon 1 of 23)	exon (NM_025992, exon 1 of 23)	215	NM_025992	Mm.297393	NM_025992	ENSMUSG00000029798	Herc6	1700121D12Rik|2510038N07Rik|4930427L17Rik|AI451296|CEB1|Herc5	hect domain and RLD 6	protein-coding	Herc6	10538590	0.555588	0.0902228	24	2.5	0.0602809	99.2159	131.227	106.147	106.087	125.683	112.557
67151	chr5-900	chr5	123228239	123228509	+	10.2	0.618	exon (NM_026000, exon 1 of 6)	exon (NM_026000, exon 1 of 6)	184	NM_026000	Mm.278997	NM_026000	ENSMUSG00000029440	Psmd9	1500011J20Rik|2610202L11Rik|Bridge-1|P27	proteasome (prosome, macropain) 26S subunit, non-ATPase, 9	protein-coding	Psmd9	10525506	0.852649	0.199965	12	11	0.137532	142.839	119.185	136.387	135.198	127.087	135.382
67158	chr18-34	chr18	31910514	31910784	+	21.9	0.615	exon (NM_026006, exon 1 of 1)	exon (NM_026006, exon 1 of 1)	1254	NM_026006	Mm.31537	NM_026006	ENSMUSG00000044982	Sft2d3	2610206C24Rik|AI847965|AW046173	SFT2 domain containing 3	protein-coding	Sft2d3	10457959	1	0.886572	12	2	0	28.2947	29.6514	29.9954	29.8651	33.6921	27.0848
67164	chr7-165	chr7	100159336	100159606	+	20.4	0.66	exon (NM_026010, exon 1 of 2)	exon (NM_026010, exon 1 of 2)	194	NM_026010	Mm.46777	NM_026010	ENSMUSG00000030725	Lipt2	2610209A20Rik	lipoyl(octanoyl) transferase 2 (putative)	protein-coding	Lipt2	10555293	1	1	20	11.5	0.0507011	266.169	218.817	237.536	262.823	294.136	255.613
67228	chr2-504	chr2	24962480	24962750	+	12.4	0.595	exon (NM_026044, exon 1 of 9)	exon (NM_026044, exon 1 of 9)	193	NM_026044	Mm.389248	NM_026044	ENSMUSG00000026975	Dph7	2810443J12Rik|AW060693|Wdr85	diphthamine biosynethesis 7	protein-coding	Wdr85///Mrpl41	10469856	1	1	20	11.1667	0.0118448	6.78045	6.78811	6.76305	6.78996	6.7893	6.91273
67412	chr10-862	chr10	29146720	29146990	+	10.2	0.789	exon (NM_026138, exon 2 of 7)	exon (NM_026138, exon 2 of 7)	2859	NM_026138	Mm.390264	NM_026138	ENSMUSG00000038916	Soga3	6330407J23Rik	SOGA family member 3	protein-coding	6330407J23Rik	10362363	1	1	20	5.16667	0.0226211	4.94152	5.04524	5.05838	5.00471	4.97016	4.92272
67451	chr16-471	chr16	16213416	16213686	+	10.2	0.737	exon (NM_026163, exon 1 of 13)	exon (NM_026163, exon 1 of 13)	206	NM_026163	Mm.2252	NM_026163	ENSMUSG00000041957	Pkp2	1200008D14Rik|1200012P04Rik|AA516617|Pkp2l	plakophilin 2	protein-coding	Pkp2	10433887	1	1	20	11.8333	0.0102868	103.96	95.111	87.1477	91.4639	88.612	100.238
67468	chr11-64	chr11	90276639	90276909	+	33.5	0.877	exon (NM_026178, exon 7 of 7)	exon (NM_026178, exon 7 of 7)	27298	NM_026178	Mm.277518	NM_026178	ENSMUSG00000003948	Mmd	1200017E07Rik|1810073C06Rik|AA690185	monocyte to macrophage differentiation-associated	protein-coding	Mmd	10380289	0.0712878	0.00309146	24	6.5	0.235431	168.365	270.347	156.754	183.311	147.685	152.289
67511	chr13-186	chr13	55593222	55593492	+	16	0.6	exon (NM_026211, exon 1 of 5)	exon (NM_026211, exon 1 of 5)	222	NM_026211	Mm.45233	NM_026211	ENSMUSG00000058569	Tmed9	2400003B06Rik	transmembrane p24 trafficking protein 9	protein-coding	Tmed9	10405488	1	1	20	8.5	0.0360601	129.441	134.601	140.451	149.24	148.505	140.327
67712	chr14-691	chr14	69284734	69285004	+	8.75	0.481	exon (NM_026331, exon 1 of 4)	exon (NM_026331, exon 1 of 4)	234	NM_026331	Mm.293635	NM_026331	ENSMUSG00000034248	Slc25a37	1700020E22Rik|4930513O14Rik|4930526G11Rik|AI848481|C330015G08Rik|Mfrn|Mfrn1|Mscp|frascati|mitoferrin	solute carrier family 25, member 37	protein-coding	Slc25a37	10421172	1	0.410551	12	2	0.0548644	265.791	251.874	240.356	265.535	236.886	236.135
67773	chr7-251	chr7	127912489	127912759	+	16.8	0.604	exon (NM_026370, exon 1 of 11)	exon (NM_026370, exon 1 of 11)	107	NM_026370	Mm.425492	NM_026370	ENSMUSG00000030801	Kat8	2010203C02Rik|5830450F21Rik|D7Ertd629e|MOF|Myst1	K(lysine) acetyltransferase 8	protein-coding	Kat8	10557831	1	0.610752	24	9	0	378.311	370.02	384.681	395.419	392.405	389.071
67797	chr13-526	chr13	38204960	38205230	+	10.9	0.75	exon (NM_026382, exon 1 of 9)	exon (NM_026382, exon 1 of 9)	156	NM_026382	Mm.250783	NM_026382	ENSMUSG00000021431	Snrnp48	1110050F08Rik|6530403A03Rik|C6orf151	small nuclear ribonucleoprotein 48 (U11/U12)	protein-coding	Snrnp48	10404675	1	1	20	8.83333	0.0168582	131.295	133.584	146.144	144.068	144.172	138.295
67844	chr10-458	chr10	10557913	10558183	+	14.6	0.647	exon (NM_026405, exon 1 of 3)	exon (NM_026405, exon 1 of 3)	159	NM_026405	Mm.31486	NM_026405	ENSMUSG00000019832	Rab32	2810011A17Rik|AU022057	RAB32, member RAS oncogene family	protein-coding	Rab32	10367822	0.723213	0.146835	24	4.5	0.116061	55.2775	51.6054	50.3301	45.2166	43.5657	40.857
67890	chr3-196	chr3	53863500	53863770	+	16	0.605	exon (NM_026435, exon 2 of 6)	exon (NM_026435, exon 2 of 6)	172	NM_026435	Mm.23067	NM_026435	ENSMUSG00000027746	Ufm1	1810045K17Rik|AI132708|AI463323|ENSMUSG00000074598|Gm10726	ubiquitin-fold modifier 1	protein-coding	Ufm1	10498158	1	1	20	11.1667	0.00526009	12.9869	12.0422	12.6892	12.9941	12.5292	13.0468
67899	chr9-399	chr9	118149890	118150160	+	13.9	0.581	exon (NM_026442, exon 1 of 4)	exon (NM_026442, exon 1 of 4)	171	NM_026442	Mm.9953	NM_026442	ENSMUSG00000039163	Cmc1	2010110K16Rik|2010312P05Rik|AI596001	COX assembly mitochondrial protein 1	protein-coding	Cmc1	10597564	0.505682	0.0762022	12	1.5	0.0935113	359.682	322.412	334.048	329.707	345.495	350.238
67922	chr8-866	chr8	72219897	72220167	+	10.2	0.6	exon (NM_026455, exon 2 of 4)	exon (NM_026455, exon 2 of 4)	302	NM_026455	Mm.28327	NM_026455	ENSMUSG00000003039	Fam32a	2510049I19Rik|AW822030|OTAG-12|Otag12	family with sequence similarity 32, member A	protein-coding	Fam32a	10572779	1	0.785093	24	7.5	0	232.901	193.585	206.791	187.77	203.927	181.587
56284	chr6-489	chr6	81965627	81965897	+	13.1	0.625	exon (NM_026490, exon 1 of 5)	exon (NM_026490, exon 1 of 5)	187	NM_026490	Mm.276293	NM_026490	ENSMUSG00000030045	Mrpl19	9030416F12Rik|9130412E02Rik|D6Ertd157e|MRP-L15|RLX1|Rpml15	mitochondrial ribosomal protein L19	protein-coding	Mrpl19	10545576	0.555588	0.0902228	24	9	0.0296985	289.466	258.9	290.505	327.112	272.615	273.283
68034	chr19-188	chr19	24476950	24477220	+	16.8	0.62	exon (NM_026520, exon 1 of 1)	exon (NM_026520, exon 1 of 1)	389	NM_026520	Mm.440181	NM_026520	ENSMUSG00000074922	Fam122a	2410124L17Rik|2900009I07Rik|ENSMUSG00000051082|Gm9849	family with sequence similarity 122, member A	protein-coding	Fam122a	10466794	1	1	20	8.16667	0.0244478	189.091	173.107	156.604	179.987	170.993	186.354
57296	chr7-222	chr7	29180304	29180574	+	17.5	0.625	exon (NM_026545, exon 1 of 7)	exon (NM_026545, exon 1 of 7)	234	NM_026545	Mm.273152	NM_026545	ENSMUSG00000030591	Psmd8	6720456J22Rik|AA407360|AL033291|AL033322|AL033323|C76433	proteasome (prosome, macropain) 26S subunit, non-ATPase, 8	protein-coding	Psmd8	10561679	1	1	20	10.5	0.0768468	1721.08	1720.49	1471.22	1545.97	1617.33	1729.57
68079	chr7-1001	chr7	34196162	34196432	+	11.7	0.613	exon (NM_026549, exon 2 of 7)	exon (NM_026549, exon 2 of 7)	350	NM_026549	Mm.38173	NM_026549	ENSMUSG00000002635	Pdcd2l	6030457N17Rik	programmed cell death 2-like	protein-coding	Pdcd2l	10562349	1	0.31062	12	0	0.00712764	266.326	264.472	286.77	273.226	257.659	276.309
52700	chr11-936	chr11	72207604	72207874	+	13.9	0.677	exon (NM_026559, exon 1 of 4)	exon (NM_026559, exon 1 of 4)	185	NM_026559	Mm.27670	NM_026559	ENSMUSG00000020803	Txndc17	4831443O22Rik|D11Ertd672e|TRP14|Txnl5	thioredoxin domain containing 17	protein-coding	Txndc17	10378059	1	1	20	9.16667	0.0133368	1006.67	1001.42	858.218	990.175	933.386	939.754
68146	chr16-578	chr16	62846566	62846836	+	9.48	0.692	exon (NM_026577, exon 1 of 10)	exon (NM_026577, exon 1 of 10)	339	NM_026577	Mm.96833	NM_026577	ENSMUSG00000022911	Arl13b	A530097K21Rik|A930014M17Rik|Arl2l1|C530009C10Rik|hnn	ADP-ribosylation factor-like 13B	protein-coding	Arl13b	10440246	1	0.469977	12	0	0.124253	94.3009	96.2043	81.8869	104.617	104.235	97.8398
68177	chr14-446	chr14	61360090	61360360	+	11.7	0.76	exon (NM_026598, exon 1 of 4)	exon (NM_026598, exon 1 of 4)	220	NM_026598	Mm.22758	NM_026598	ENSMUSG00000021928	Ebpl	5730442K12Rik|EBRP	emopamil binding protein-like	protein-coding	Ebpl	10420631	1	0.998554	24	4	0.0962443	141.234	140.556	145.229	129.668	129.03	126.485
52858	chr7-332	chr7	126976634	126976904	+	18.2	0.744	exon (NM_026638, exon 1 of 6)	exon (NM_026638, exon 1 of 6)	855	NM_001347656	Mm.28219	NM_026638	ENSMUSG00000030682	Cdipt	9530042F15Rik|D7Bwg0575e|Pis|Pis1	CDP-diacylglycerol--inositol 3-phosphatidyltransferase (phosphatidylinositol synthase)	protein-coding	Cdipt	10557560	1	1	20	12.8333	0.0273595	8.60582	8.50889	8.65604	8.45881	8.43185	8.69111
68440	chr1-96	chr1	172632592	172632862	+	22.6	0.583	exon (NM_026725, exon 1 of 2)	exon (NM_026725, exon 1 of 2)	247	NM_026725	Mm.33024	NM_026725	ENSMUSG00000026544	Dusp23	1300005N15Rik|LDP-3	dual specificity phosphatase 23	protein-coding	Dusp23	10360321	1	1	20	10.1667	0.0473769	415.084	330.556	369.682	373.963	388.263	350.857
68576	chr3-349	chr3	107278880	107279150	+	14.6	0.71	exon (NM_026774, exon 1 of 4)	exon (NM_026774, exon 1 of 4)	157	NM_026774	Mm.290035	NM_026774	ENSMUSG00000087260	Lamtor5	1110003H18Rik|Hbxip|XIP	late endosomal/lysosomal adaptor, MAPK and MTOR activator 5	protein-coding	Hbxip	10495201	0.460888	0.0641441	24	16	0.0400717	8.08344	8.04163	8.05136	8.14011	8.17672	8.09313
68576	chr3-349	chr3	107278880	107279150	+	14.6	0.71	exon (NM_026774, exon 1 of 4)	exon (NM_026774, exon 1 of 4)	157	NM_026774	Mm.290035	NM_026774	ENSMUSG00000087260	Lamtor5	1110003H18Rik|Hbxip|XIP	late endosomal/lysosomal adaptor, MAPK and MTOR activator 5	protein-coding	Hbxip	10607585	1	0.998554	12	7.5	0.0794434	6.33099	6.18867	6.4605	6.27226	6.25153	6.33507
68581	chr12-183	chr12	85374392	85374662	+	16.8	0.61	exon (NM_026775, exon 1 of 5)	exon (NM_026775, exon 1 of 5)	190	NM_026775	Mm.379159	NM_026775	ENSMUSG00000021248	Tmed10	1110014C03Rik|Tmp21|p23|p24delta1	transmembrane p24 trafficking protein 10	protein-coding	Tmed10	10401661	1	1	20	13.5	0.00304763	431.008	431.354	409.075	423.527	429.305	423.31
26901	chr9-232	chr9	121710562	121710832	+	17.5	0.757	exon (NM_026794, exon 2 of 3)	exon (NM_026794, exon 2 of 3)	308	NM_026794	Mm.24848	NM_026794	ENSMUSG00000032526	Ss18l2	1110020I04Rik|AI463209|Deb1	SS18, nBAF chromatin remodeling complex subunit like 2	protein-coding	Deb1	10590383	1	0.785093	18	4.5	0.0413375	8.01786	7.91858	7.98234	8.06282	7.85431	7.92613
52829	chr4-1576	chr4	80953519	80953789	+	7.29	0.8	exon (NM_026821, exon 2 of 2)	exon (NM_026821, exon 2 of 2)	42968	NM_026821	Mm.273986	NM_026821	ENSMUSG00000048706	Lurap1l	1110029A09Rik|AV077978|AV175137|D4Bwg0951e|WI-13707|bM350F23.1	leucine rich adaptor protein 1-like	protein-coding	D4Bwg0951e	10505623	1	1	20	9.5	0	6.98499	7.00867	7.25261	6.89069	7.06428	6.98775
68724	chr1-586	chr1	135146866	135147136	+	14.6	0.697	exon (NM_026823, exon 1 of 7)	exon (NM_026823, exon 1 of 7)	167	NM_026823	Mm.174998	NM_026823	ENSMUSG00000026426	Arl8a	1110033P22Rik|Arl10b|gie2	ADP-ribosylation factor-like 8A	protein-coding	Arl8a	10350113	0.418067	0.0538095	24	12.5	0.101618	643.078	724.253	717.498	798.977	757.982	686.117
68939	chr5-617	chr5	74195322	74195592	+	13.1	0.625	exon (NM_026878, exon 1 of 4)	exon (NM_026878, exon 1 of 4)	131	NM_026878	Mm.293316	NM_026878	ENSMUSG00000049907	Rasl11b	1190017B18Rik	RAS-like, family 11, member B	protein-coding	Rasl11b	10522467	0.723213	0.146835	24	18.6667	0.115133	61.2985	54.358	63.5148	85.23	69.885	82.6006
68971	chr6-361	chr6	115037601	115037871	+	13.9	0.618	exon (NM_026894, exon 1 of 8)	exon (NM_026894, exon 1 of 8)	138	NM_026894	Mm.24937	NM_026894	ENSMUSG00000030316	Tamm41	1500001M20Rik|TAM41	TAM41 mitochondrial translocator assembly and maintenance homolog	protein-coding	1500001M20Rik	10547015	1	1	20	11.1667	0.00897947	6.153	6.15357	6.00276	6.02354	6.12312	5.95126
69009	chr16-54	chr16	17530658	17530928	+	21.1	0.661	exon (NM_026909, exon 2 of 5)	exon (NM_026909, exon 2 of 5)	259	NM_026909	Mm.10174	NM_026909	ENSMUSG00000022760	Thap7	1810004B07Rik	THAP domain containing 7	protein-coding	Thap7	10438171	1	0.693388	12	3	0.103683	184.691	203.879	161.534	192.709	189.947	195.247
69136	chr4-176	chr4	93335272	93335542	+	17.5	0.617	exon (NM_026954, exon 1 of 1)	exon (NM_026954, exon 1 of 1)	104	NM_026954	Mm.171558	NM_026954	ENSMUSG00000054000	Tusc1	2200001D17Rik|TSG-9	tumor suppressor candidate 1	protein-coding	Tusc1	10514392	0.66424	0.125235	24	17	6.28e-16	159.992	113.542	142.758	126.052	142.725	129.244
69219	chr3-340	chr3	145758838	145759108	+	13.1	0.821	exon (NM_026993, exon 1 of 6)	exon (NM_026993, exon 1 of 6)	281	NM_026993	Mm.234247	NM_026993	ENSMUSG00000028194	Ddah1	2410006N07Rik|2510015N06Rik|AI987801|AW050362	dimethylarginine dimethylaminohydrolase 1	protein-coding	Ddah1	10496727	0.505682	0.0762022	24	9	0.225602	171.803	241.007	261.522	260.044	176.628	180.712
56612	chr15-138	chr15	102326100	102326370	+	18.2	0.596	exon (NM_027044, exon 1 of 6)	exon (NM_027044, exon 1 of 6)	119	NM_027044	Mm.158264	NM_020031	ENSMUSG00000001289	Pfdn5	1190001O17Rik|1700010A06Rik|D15Ertd697e|Eig1|MM-1	prefoldin 5	protein-coding	Pfdn5	10427199	1	0.693388	12	2	0.0478641	9.33115	9.3222	9.1886	9.25353	9.05145	9.21738
69349	chr7-277	chr7	44360126	44360396	+	16.8	0.735	exon (NM_027049, exon 6 of 6)	exon (NM_027049, exon 6 of 6)	14769	NM_027049	Mm.358922	NM_027049	ENSMUSG00000008028	1700008O03Rik	-	RIKEN cDNA 1700008O03 gene	protein-coding	1700008O03Rik	10562767	1	1	20	8.16667	0.0102381	49.0935	44.1588	46.4337	45.2963	42.8728	53.6978
19015	chr17-66	chr17	28226074	28226344	+	21.9	0.745	exon (NM_027185, exon 9 of 11)	exon (NM_027185, exon 9 of 11)	-6545	NM_011145	Mm.328914	NM_011145	ENSMUSG00000002250	Ppard	NUC-1|NUC1|Nr1c2|PPAR-beta|PPAR-delta|PPAR[b]|PPARdelta|Pparb|Pparb/d	peroxisome proliferator activator receptor delta	protein-coding	Ppard	10443332	1	0.610752	12	0	0.117238	538.966	454.123	484.714	492.258	478.27	495.723
69726	chr1-392	chr1	179517734	179518004	+	15.3	0.581	exon (NM_027188, exon 1 of 12)	exon (NM_027188, exon 1 of 12)	134	NM_027188	Mm.222338	NM_027188	ENSMUSG00000055067	Smyd3	2410008A19Rik|Zmynd1	SET and MYND domain containing 3	protein-coding	Smyd3	10360563	1	0.536501	12	2.5	0.0130673	152.813	156.249	154.26	154.035	161.253	154.515
69790	chr15-259	chr15	52712442	52712712	+	13.9	0.615	exon (NM_027212, exon 1 of 4)	exon (NM_027212, exon 1 of 4)	132	NM_027212	Mm.195562	NM_027212	ENSMUSG00000038622	Med30	1810038N03Rik|2510044J04Rik|TRAP25|Thrap6	mediator complex subunit 30	protein-coding	Med30	10424097	1	0.357622	12	2	0	68.4083	73.021	73.1609	74.3577	67.5695	71.5981
101861	chr7-803	chr7	97500873	97501143	+	11.7	0.72	exon (NM_027256, exon 7 of 23)	exon (NM_027256, exon 7 of 23)	20052	NM_027256	Mm.27383	NM_027256	ENSMUSG00000025133	Ints4	2610034N24Rik|AA692684|AW493223	integrator complex subunit 4	protein-coding	Ints4	10555063	0.460888	0.0641441	12	0	0.103556	296.745	266.02	302.313	322.175	300.596	303.003
70069	chr15-1077	chr15	98256226	98256496	+	8.75	0.65	exon (NM_027304, exon 1 of 1)	exon (NM_027304, exon 1 of 1)	946	NM_027304	Mm.107718	NM_027304	ENSMUSG00000048077	H1fnt	1700026P10Rik|H1.7|H1t2|Hanp1|mH1t2	H1 histone family, member N, testis-specific	protein-coding	H1fnt	10432135	0.505682	0.0762022	12	8.5	0.160754	66.7817	57.1741	70.4032	60.8337	62.1296	61.6287
70478	chr14-211	chr14	60784578	60784848	+	16	0.667	exon (NM_027436, exon 1 of 19)	exon (NM_027436, exon 1 of 19)	147	NM_027436	Mm.274650	NM_027436	ENSMUSG00000021993	Mipep	5730405E07Rik|MIP	mitochondrial intermediate peptidase	protein-coding	Mipep	10415742	1	0.31062	12	1	0.0975454	439.193	369.549	411.17	404.327	411.409	408.896
70495	chrX-78	chrX	12587769	12588039	+	10.2	0.68	exon (NM_027439, exon 1 of 9)	exon (NM_027439, exon 1 of 9)	145	NM_027439	Mm.25148	NM_027439	ENSMUSG00000031007	Atp6ap2	(P)RR|5730403E06Rik|APT6M8-9|ATP6M8-9|Atp6ip2|M8-9|PRR	ATPase, H+ transporting, lysosomal accessory protein 2	protein-coding	Atp6ap2	10598664	1	0.886572	12	2	0	186.902	220.75	236.947	241.415	228.742	195.276
100233208	chr10-44	chr10	81643714	81643984	+	27.7	0.672	exon (NM_027480, exon 17 of 20)	exon (NM_027480, exon 17 of 20)	-5220	NM_001142963	Mm.327168	NM_001142963	ENSMUSG00000096856	Gm10778	ENSMUSG00000074860	predicted gene 10778	protein-coding	Gm10778	10365199	1	1	20	10.8333	0.0240919	106.118	109.213	109.034	118.956	99.6985	113.537
56249	chr14-200	chr14	29978416	29978686	+	14.6	0.618	exon (NM_027493, exon 1 of 13)	exon (NM_027493, exon 1 of 13)	214	NM_027493	Mm.215110	NM_027493	ENSMUSG00000015971	Actr8	5730542K05Rik|ARP8	ARP8 actin-related protein 8	protein-coding	Actr8	10413502	1	0.610752	12	0	0.0817345	331.529	315.188	315.409	346.985	356.735	318.284
70650	chr5-525	chr5	123720638	123720908	+	13.9	0.531	exon (NM_027494, exon 1 of 14)	exon (NM_027494, exon 1 of 14)	271	NM_027494	Mm.279427	NM_027494	ENSMUSG00000029427	Zcchc8	5730565F05Rik	zinc finger, CCHC domain containing 8	protein-coding	Zcchc8	10533687	0.922182	0.232281	12	0	0.00511238	248.701	250.937	267.203	299.358	247.345	269.954
71567	chr10-653	chr10	53629659	53629929	+	11.7	0.613	exon (NM_027830, exon 2 of 14)	exon (NM_027830, exon 2 of 14)	645	NM_027830	Mm.278221	NM_027830	ENSMUSG00000058298	Mcm9	9030408O17Rik|Gm235|Mcmdc1	minichromosome maintenance 9 homologous recombination repair factor	protein-coding	Mcm9	10369116	0.00673042	9.66e-05	24	3	0.0955301	42.649	44.9008	39.9737	39.886	40.426	39.2027
71673	chr11-571	chr11	4135211	4135481	+	15.3	0.694	exon (NM_027859, exon 1 of 9)	exon (NM_027859, exon 1 of 9)	186	NM_027859	Mm.240586	NM_027859	ENSMUSG00000003581	Rnf215	0610009J22Rik|AW557025|C77903	ring finger protein 215	protein-coding	Rnf215	10373861	1	1	20	6.16667	0.023505	101.712	87.3666	87.1404	82.4536	81.8676	83.5362
71701	chr11-1518	chr11	29130756	29131026	+	10.2	0.68	exon (NM_027869, exon 1 of 28)	exon (NM_027869, exon 1 of 28)	140	NM_027869	Mm.211131	NM_027869	ENSMUSG00000020464	Pnpt1	1200003F12Rik|Old35|PNPase|Pnptl1	polyribonucleotide nucleotidyltransferase 1	protein-coding	Pnpt1	10374793	0.786454	0.171619	24	13	0.100098	220.119	227.919	251.01	279.621	239.546	248.271
71726	chr15-9	chr15	103155770	103156040	+	43.7	0.763	exon (NM_027885, exon 6 of 6)	exon (NM_027885, exon 6 of 6)	7379	NM_027885	Mm.254820	NM_027885	ENSMUSG00000036061	Smug1	1200013B09Rik|A930006H09Rik|C85220	single-strand selective monofunctional uracil DNA glycosylase	protein-coding	Smug1	10433077	1	0.785093	24	15	0.0438406	49.1034	50.5704	50.0213	45.0405	51.2596	53.5383
219189	chr14-98	chr14	78849210	78849480	+	17.5	0.78	exon (NM_027906, exon 1 of 45)	exon (NM_027906, exon 1 of 45)	167	NM_173758	Mm.159651	NM_027906	ENSMUSG00000058997	Vwa8	1300010F03Rik|4932416F07Rik|AI957255|Kiaa0564|mKIAA0564	von Willebrand factor A domain containing 8	protein-coding	1300010F03Rik	10416588	0.0521571	0.00192078	24	13	0.056915	9.92486	9.93118	10.0302	10.0662	10.0052	9.95955
71883	chr5-853	chr5	100673956	100674226	+	11.7	0.656	exon (NM_027978, exon 1 of 7)	exon (NM_027978, exon 1 of 7)	165	NM_027978	Mm.260661	NM_027978	ENSMUSG00000029319	Coq2	2310002F18Rik|PHB:PPT	coenzyme Q2 4-hydroxybenzoate polyprenyltransferase	protein-coding	Coq2	10531729	1	1	20	12.8333	0.0517641	724.424	689.401	747.267	658.669	727.7	772.831
71919	chr15-368	chr15	97680332	97680602	+	15.3	0.759	exon (NM_028003, exon 14 of 17)	exon (NM_028003, exon 14 of 17)	25355	NM_028003	Mm.12255	NM_028003	ENSMUSG00000022466	Rpap3	2310042P20Rik|D15Ertd682e	RNA polymerase II associated protein 3	protein-coding	Rpap3	10431948	1	1	20	11.1667	0.0890617	94.0535	91.6371	79.2281	91.8775	106.871	88.7798
71956	chr11-487	chr11	80183865	80184135	+	15.3	0.619	exon (NM_028019, exon 1 of 5)	exon (NM_028019, exon 1 of 5)	128	NM_028019	Mm.22985	NM_028019	ENSMUSG00000020707	Rnf135	0610037N03Rik|2410006N06Rik	ring finger protein 135	protein-coding	Rnf135	10379401	1	1	20	6.5	0.00403444	44.8399	41.727	48.4529	43.9061	39.8636	38.5444
112407	chr12-137	chr12	54203236	54203506	+	17.5	0.628	exon (NM_028133, exon 1 of 5)	exon (NM_028133, exon 1 of 5)	503	NM_028133	Mm.133037	NM_028133	ENSMUSG00000035105	Egln3	2610021G09Rik|AI505553|AI648162|Hif-p4h-3|Phd3|SM-20	egl-9 family hypoxia-inducible factor 3	protein-coding	Egln3	10400304	0.608446	0.10647	12	11	0.450236	407.047	369.203	604.563	583.331	461.687	477.7
70316	chr7-287	chr7	122101592	122101862	+	16.8	0.634	exon (NM_028177, exon 1 of 5)	exon (NM_028177, exon 1 of 5)	121	NM_028177	Mm.3014	NM_028177	ENSMUSG00000030869	Ndufab1	2210401F17Rik|2310039H15Rik|2610003B19Rik|8kDa|9130423F15Rik|ACP|CI-SDAP|SDAP	NADH dehydrogenase (ubiquinone) 1, alpha/beta subcomplex, 1	protein-coding	Ndufab1	10567657	1	1	20	7.16667	0.0365645	1003.04	947.367	995.64	1048.64	931.312	947.807
72320	chr10-470	chr10	62578069	62578339	+	13.1	0.523	exon (NM_028197, exon 1 of 7)	exon (NM_028197, exon 1 of 7)	253	NM_028197	Mm.258955	NM_028197	ENSMUSG00000036955	Kif1bp	0710007C18Rik|2510003E04Rik|KBP|mKIAA1279	KIF1 binding protein	protein-coding	2510003E04Rik	10369620	1	0.886572	12	0.5	0	8.85072	8.87418	8.90221	9.01044	8.98137	8.93289
72421	chr2-1078	chr2	75938127	75938397	+	11.7	0.588	exon (NM_028235, exon 1 of 1)	exon (NM_028235, exon 1 of 1)	200	NM_028235	Mm.275109	NM_028235	ENSMUSG00000075273	Ttc30b	2510042P03Rik|Tcc30b	tetratricopeptide repeat domain 30B	protein-coding	Ttc30b	10483819	1	1	20	10.8333	0.00935188	23.2019	37.21	28.9976	32.3105	32.9818	30.818
72462	chr17-175	chr17	32036388	32036658	+	17.5	0.569	exon (NM_028244, exon 1 of 16)	exon (NM_028244, exon 1 of 16)	361	NM_028244	Mm.102761	NM_028244	ENSMUSG00000058392	Rrp1b	2600005C20Rik|D030064A17|Kiaa0179|mKIAA0179	ribosomal RNA processing 1 homolog B (S. cerevisiae)	protein-coding	Rrp1b	10443836	0.304521	0.0311014	12	1	0	106.459	120.723	109.336	110.48	111.458	106.116
72472	chr10-429	chr10	40141628	40141898	+	16	0.625	exon (NM_028247, exon 1 of 3)	exon (NM_028247, exon 1 of 3)	491	NM_028247	Mm.186778	NM_028247	ENSMUSG00000019838	Slc16a10	2610103N14Rik|9830169E08|Mct10|PRO0813|TAT1	solute carrier family 16 (monocarboxylic acid transporters), member 10	protein-coding	Slc16a10	10368720	0.0220008	0.000536109	24	7.5	0.107105	501.175	521.868	542.707	516.925	462.814	474.193
72514	chr19-323	chr19	36918982	36919252	+	13.9	0.649	exon (NM_028263, exon 2 of 2)	exon (NM_028263, exon 2 of 2)	482	NM_028263	Mm.41674	NM_028263	ENSMUSG00000047632	Fgfbp3	2610306H15Rik|Fgf-bp3	fibroblast growth factor binding protein 3	protein-coding	Fgfbp3	10467211	1	0.410551	12	7	0.0107197	43.7436	37.5065	40.2292	36.181	43.0986	41.0039
72662	chr14-120	chr14	99099520	99099790	+	18.2	0.574	exon (NM_028315, exon 1 of 21)	exon (NM_028315, exon 1 of 21)	115	NM_028315	Mm.163339	NM_028315	ENSMUSG00000033166	Dis3	2810028N01Rik	DIS3 homolog, exosome endoribonuclease and 3'-5' exoribonuclease	protein-coding	Dis3	10421981	0.505682	0.0762022	12	1	0.00828729	205.043	218.309	203.384	225.07	218.479	210.221
72668	chr2-888	chr2	18047093	18047363	+	12.4	0.594	exon (NM_028317, exon 1 of 1)	exon (NM_028317, exon 1 of 1)	1221	NM_028317	Mm.102183	NM_028317	ENSMUSG00000054074	Skida1	2810030E01Rik|5730507N06Rik|BB088113	SKI/DACH domain containing 1	protein-coding	2810030E01Rik	10480324	1	1	20	7.83333	0.040958	4.92304	4.72014	4.92305	4.78325	4.6791	4.84393
73247	chr2-471	chr2	180582769	180583039	+	15.3	0.722	exon (NM_028479, exon 2 of 6)	exon (NM_028479, exon 2 of 6)	1600	NM_028479	Mm.426558	NM_028479	ENSMUSG00000027569	Mrgbp	1600027N09Rik|AW060503|C80444	MRG/MORF4L binding protein	protein-coding	1600027N09Rik	10479402	1	0.998554	12	4	0.0302359	5.50632	5.51647	5.44404	5.44792	5.37384	5.40098
73296	chr13-296	chr13	75943113	75943383	+	12.4	0.595	exon (NM_028493, exon 2 of 12)	exon (NM_028493, exon 2 of 12)	576	NM_028493	Mm.276200	NM_028493	ENSMUSG00000021589	Rhobtb3	1700040C17Rik|2610033K01Rik|4930503C18Rik|AI317148|AW208826|mKIAA0878	Rho-related BTB domain containing 3	protein-coding	Rhobtb3	10410695	0.0373613	0.00117065	24	5	0.0541502	369.953	352.534	353.587	361.026	318.553	342.901
73711	chr8-168	chr8	71543032	71543302	+	18.2	0.66	exon (NM_028617, exon 2 of 9)	exon (NM_028617, exon 2 of 9)	237	NM_028617	Mm.307770	NM_028617	ENSMUSG00000031813	Mvb12a	1110012M11Rik|Fam125a	multivesicular body subunit 12A	protein-coding	Fam125a	10572637	0.555588	0.0902228	24	15	0.0505016	8.44492	8.35922	8.53622	8.59706	8.46091	8.54535
73916	chr16-494	chr16	49699351	49699621	+	10.2	0.556	exon (NM_028680, exon 1 of 11)	exon (NM_028680, exon 1 of 11)	192	NM_028680	Mm.241276	NM_028680	ENSMUSG00000032965	Ift57	4833420A15Rik|Esrrbl1|Hippi|MHS4R2	intraflagellar transport 57	protein-coding	Ift57	10436169	1	1	20	9.16667	0.0361748	73.7172	72.7245	68.7072	62.5991	75.3241	71.5287
74019	chr1-433	chr1	91494716	91494986	+	13.9	0.6	exon (NM_028718, exon 1 of 15)	exon (NM_028718, exon 1 of 15)	183	NM_028718	Mm.318430	NM_028718	ENSMUSG00000034292	Traf3ip1	3930402D05Rik|AU041749|MIP-T3	TRAF3 interacting protein 1	protein-coding	Traf3ip1	10348600	1	1	20	12.1667	0.00369581	43.0109	41.9352	42.9918	40.4815	42.8582	40.0592
52635	chr12-67	chr12	116281404	116281674	+	21.1	0.514	exon (NM_028731, exon 1 of 22)	exon (NM_028731, exon 1 of 22)	317	NM_028731	Mm.273755	NM_028731	ENSMUSG00000021171	Esyt2	2410017M09Rik|4921504I16Rik|CHR2SYT|D12Ertd551e|Fam62b	extended synaptotagmin-like protein 2	protein-coding	Esyt2	10399061	1	0.693388	24	5	0.0110521	575.711	576.897	568.072	570.681	567.954	568.174
94181	chr4-53	chr4	46507242	46507512	+	26.2	0.727	exon (NM_029077, exon 6 of 6)	exon (NM_029077, exon 6 of 6)	18048	NM_053179	Mm.249349	NM_053179	ENSMUSG00000028334	Nans	4632418E04Rik|BB056474|Sas	N-acetylneuraminic acid synthase (sialic acid synthase)	protein-coding	Nans	10504743	1	0.886572	12	2	0.0186323	86.6213	81.0157	88.7509	85.145	80.1433	79.3292
52837	chr2-96	chr2	134643715	134643985	+	22.6	0.686	exon (NM_029148, exon 1 of 8)	exon (NM_029148, exon 1 of 8)	271	NM_029148	Mm.264096	NM_029148	ENSMUSG00000034723	Tmx4	2810417D04Rik|4930500L08Rik|AI843224|AW046784|D2Bwg1356e|Txndc13|mKIAA1162	thioredoxin-related transmembrane protein 4	protein-coding	Tmx4	10488020	1	1	20	10.5	0.0209948	397.704	422.855	465.953	448.788	432.333	437.309
75516	chr12-219	chr12	9030024	9030294	+	15.3	0.676	exon (NM_029321, exon 1 of 3)	exon (NM_029321, exon 1 of 3)	162	NM_029321	Mm.37581	NM_029321	ENSMUSG00000066637	Ttc32	1700013G20Rik	tetratricopeptide repeat domain 32	protein-coding	Ttc32	10394527	1	0.357622	12	1	0.0938331	139.917	126.259	127.49	147.219	137.622	122.777
75612	chr10-239	chr10	121365211	121365481	+	16.8	0.652	exon (NM_029364, exon 1 of 14)	exon (NM_029364, exon 1 of 14)	256	NM_029364	Mm.207683	NM_029364	ENSMUSG00000034707	Gns	2610016K11Rik|AU042285|C87209|G6S|N28088	glucosamine (N-acetyl)-6-sulfatase	protein-coding	Gns	10366667	0.994691	0.269008	24	5	0.036819	460.51	503.173	495.963	484.563	432.067	441.583
75686	chr9-368	chr9	105131280	105131550	+	16	0.578	exon (NM_029385, exon 2 of 3)	exon (NM_029385, exon 2 of 3)	390	NM_029385	Mm.305810	NM_029385	ENSMUSG00000032565	Nudt16	2310041H06Rik|2810047L04Rik|2900006H04Rik|AI851783	nudix (nucleoside diphosphate linked moiety X)-type motif 16	protein-coding	Nudt16	10596318	1	1	20	6.16667	0.0166319	108.377	110.704	108.064	110.685	107.483	106.313
75964	chr18-110	chr18	20895827	20896097	+	16.8	0.589	exon (NM_029491, exon 1 of 16)	exon (NM_029491, exon 1 of 16)	116	NM_029491	Mm.273769	NM_029491	ENSMUSG00000033382	Trappc8	5033403J15Rik|AI845423|D030074E01Rik|Trs85|mKIAA1012	trafficking protein particle complex 8	protein-coding	Trappc8	10457745	0.608446	0.10647	12	1	0.129302	326.475	333.638	299.058	354.232	307.642	312.625
75965	chr14-168	chr14	57889952	57890222	+	17.5	0.638	exon (NM_029492, exon 1 of 13)	exon (NM_029492, exon 1 of 13)	175	NM_029492	Mm.29044	NM_029492	ENSMUSG00000021969	Zdhhc20	4930542A17Rik|5033406L14Rik|AI448102|B230110O18Rik|ENSMUSG00000055956|HK11	zinc finger, DHHC domain containing 20	protein-coding	Zdhhc20	10420437	0.994691	0.269008	12	6	0.0471994	13.2772	14.9282	14.8502	13.9369	14.4835	14.368
76294	chr8-1274	chr8	54550404	54550674	+	8.75	0.591	exon (NM_029569, exon 1 of 7)	exon (NM_029569, exon 1 of 7)	208	NM_029569	Mm.33171	NM_029569	ENSMUSG00000031519	Asb5	1110018D09Rik	ankyrin repeat and SOCs box-containing 5	protein-coding	Asb5	10571797	0.460888	0.0641441	24	15	0.0832972	3484.17	3299.88	3538.2	3597.55	3780.6	3585.35
100087	chr4-789	chr4	108847881	108848151	+	11.7	0.564	exon (NM_029571, exon 1 of 1)	exon (NM_029571, exon 1 of 1)	159	NM_029571	Mm.440007	NM_029571	ENSMUSG00000073775	Kti12	1110001A12Rik|AI326810|AU014758	KTI12 homolog, chromatin associated	protein-coding	Kti12	10506880	1	0.65207	12	2	0.0212132	1352.11	1325.48	1267.97	1375.75	1330.36	1300.91
76547	chr11-165	chr11	102156152	102156422	+	23.3	0.727	exon (NM_029649, exon 1 of 4)	exon (NM_029649, exon 1 of 4)	120	NM_029649	Mm.46529	NM_029649	ENSMUSG00000020921	Tmem101	2610511E22Rik	transmembrane protein 101	protein-coding	Tmem101	10391567	0.460888	0.0641441	12	11	0.0833184	51.5346	45.0908	49.7274	46.7	44.389	44.7641
76687	chr8-454	chr8	54529761	54530031	+	13.9	0.469	exon (NM_029701, exon 1 of 5)	exon (NM_029701, exon 1 of 5)	102	NM_029701	Mm.86437	NM_029701	ENSMUSG00000054408	Spcs3	1810011E08Rik|SPC22/23	signal peptidase complex subunit 3 homolog (S. cerevisiae)	protein-coding	Spcs3	10578703	1	0.536501	12	2	0.0218496	468.044	441.907	434.279	452.919	433.774	423.454
76742	chr3-219	chr3	94582169	94582439	+	15.3	0.578	exon (NM_029721, exon 1 of 12)	exon (NM_029721, exon 1 of 12)	412	NM_029721	Mm.28160	NM_029721	ENSMUSG00000028136	Snx27	5730552M22Rik|ESTM45|ESTM47|R75405	sorting nexin family member 27	protein-coding	Snx27	10499996	1	0.886572	12	2	0.0833113	439.053	452.533	417.045	453.821	424.947	445.509
76826	chr12-557	chr12	52097751	52098021	+	11.7	0.739	exon (NM_029760, exon 1 of 11)	exon (NM_029760, exon 1 of 11)	140	NM_029760	Mm.244781	NM_029760	ENSMUSG00000035142	Nubpl	2410170E07Rik	nucleotide binding protein-like	protein-coding	Nubpl	10395684	1	0.610752	12	2	0.0727825	46.9379	62.4821	58.1795	59.3823	63.7476	60.2926
77134	chr13-193	chr13	58128020	58128290	+	19	0.63	exon (NM_029872, exon 1 of 1)	exon (NM_029872, exon 1 of 1)	401	NM_029872	Mm.490274	NM_029872	ENSMUSG00000007836	Hnrnpa0	1110055B05Rik|3010025E17Rik|Hnrpa0|hnRNP A0	heterogeneous nuclear ribonucleoprotein A0	protein-coding	Hnrnpa0	10409643	1	1	20	7.83333	0.0239497	112.729	110.452	108.377	101.184	105.322	100.072
108903	chr11-839	chr11	121451917	121452187	+	13.1	0.513	exon (NM_029878, exon 1 of 39)	exon (NM_029878, exon 1 of 39)	103	NM_029878	Mm.23686	NM_029878	ENSMUSG00000039230	Tbcd	2310057L06Rik|A030005L14Rik|mKIAA0988	tubulin-specific chaperone d	protein-coding	Tbcd	10383575	1	1	20	8.5	0.0149121	206.207	219.65	231.385	226.733	236.587	220.9
52120	chr8-746	chr8	25976413	25976683	+	11.7	0.576	exon (NM_029884, exon 1 of 18)	exon (NM_029884, exon 1 of 18)	196	NM_029884	Mm.28326	NM_029884	ENSMUSG00000037260	Hgsnat	9430010M12Rik|AW208455|D8Ertd354e|Tmem76	heparan-alpha-glucosaminide N-acetyltransferase	protein-coding	Hgsnat	10577882	1	1	20	10.8333	0.0283149	472.66	433.777	454.731	464.753	475.341	443.263
77634	chr4-740	chr4	83417741	83418011	+	10.9	0.548	exon (NM_029949, exon 1 of 9)	exon (NM_029949, exon 1 of 9)	132	NM_029949	Mm.271985	NM_029949	ENSMUSG00000028483	Snapc3	1810020H02Rik|4930558A07Rik|5031401C21Rik|AI414457|E030018J20Rik	small nuclear RNA activating complex, polypeptide 3	protein-coding	Snapc3	10505630	1	0.536501	24	4	0.0417759	466.654	582.749	545.827	511.078	509.532	522.769
78244	chr15-540	chr15	10470187	10470457	+	11.7	0.586	exon (NM_030046, exon 1 of 12)	exon (NM_030046, exon 1 of 12)	194	NM_030046	Mm.297862	NM_030046	ENSMUSG00000044224	Dnajc21	4930461P20Rik|9930116P15Rik	DnaJ heat shock protein family (Hsp40) member C21	protein-coding	Dnajc21	10427704	0.66424	0.125235	12	1	0.122711	943.926	937.211	930.886	1003.2	913.841	960.845
78581	chr15-521	chr15	51877456	51877726	+	10.9	0.679	exon (NM_030132, exon 1 of 3)	exon (NM_030132, exon 1 of 3)	150	NM_030132	Mm.176347	NM_030132	ENSMUSG00000022313	Utp23	1700010I21Rik|AI662478|BB238373|D530033C11Rik	UTP23 small subunit processome component	protein-coding	Utp23	10424077	1	1	20	13.1667	0.0122212	47.1877	38.546	42.5153	38.9211	47.1577	39.5575
78802	chr2-771	chr2	75981446	75981716	+	14.6	0.719	exon (NM_030188, exon 1 of 1)	exon (NM_030188, exon 1 of 1)	386	NM_030188	Mm.282339	NM_030188	ENSMUSG00000075271	Ttc30a1	4930506L13Rik	tetratricopeptide repeat domain 30A1	protein-coding	Ttc30a1	10483824	0.0220008	0.000536109	24	12	0.0712976	26.4035	27.8148	28.7879	30.6837	29.4899	27.3237
78833	chr8-317	chr8	95633569	95633839	+	16	0.707	exon (NM_030198, exon 1 of 3)	exon (NM_030198, exon 1 of 3)	145	NM_030198	Mm.35546	NM_030198	ENSMUSG00000031669	Gins3	2700085M18Rik|AI616142	GINS complex subunit 3 (Psf3 homolog)	protein-coding	Gins3	10574378	0.377948	0.044983	12	7	0.0175009	47.6637	49.7364	53.7011	47.3007	53.3675	51.0745
72480	chr10-712	chr10	34297703	34297973	+	10.2	0.63	exon (NM_030203, exon 1 of 1)	exon (NM_030203, exon 1 of 1)	417	NM_030203	Mm.21485	NM_030203	ENSMUSG00000039485	Tspyl4	2610102M01Rik|B230210I21Rik|D10Bwg0791e	TSPY-like 4	protein-coding	Tspyl4	10362490	1	1	20	13.8333	0.0433661	71.6369	75.9522	84.1196	72.6751	64.8664	89.9574
78935	chr7-374	chr7	46710397	46710667	+	16.8	0.75	exon (NM_030233, exon 1 of 12)	exon (NM_030233, exon 1 of 12)	119	NM_030233	Mm.289866	NM_030233	ENSMUSG00000006763	Saal1	5031425D22Rik|SPACIA1	serum amyloid A-like 1	protein-coding	Saal1	10563583	0.994691	0.269008	24	18.5	0.0583858	175.571	182.436	169.15	178.625	204.503	179.874
52014	chr10-75	chr10	52417992	52418262	+	23.3	0.66	exon (NM_030250, exon 1 of 5)	exon (NM_030250, exon 1 of 5)	580	NM_030250	Mm.199964	NM_030250	ENSMUSG00000023068	Nus1	1600027K07Rik|AU019165|AW538011|BC003223|D10Ertd438e	NUS1 dehydrodolichyl diphosphate synthase subunit	protein-coding	Nus1	10363137	0.66424	0.125235	12	2	0.0288075	481.95	519.313	479.804	581.014	514.926	477.544
80291	chr5-420	chr5	124477917	124478187	+	13.1	0.556	exon (NM_030259, exon 1 of 4)	exon (NM_030259, exon 1 of 4)	183	NM_030259	Mm.425280	NM_030259	ENSMUSG00000029401	Rilpl2	-	Rab interacting lysosomal protein-like 2	protein-coding	Rilpl2	10533844	1	1	20	12.8333	0	45.9263	45.1799	52.2048	43.5141	41.5133	50.5119
80750	chr8-332	chr8	86884726	86884996	+	16	0.571	exon (NM_030563, exon 1 of 7)	exon (NM_030563, exon 1 of 7)	397	NM_030563	Mm.25117	NM_030563	ENSMUSG00000031652	N4bp1	AI481586|C81621	NEDD4 binding protein 1	protein-coding	N4bp1	10580457	0.505682	0.0762022	24	6	0.0527572	463.974	521.372	489.261	518.841	453.083	458.266
80859	chr16-93	chr16	55821902	55822172	+	19	0.674	exon (NM_030612, exon 3 of 14)	exon (NM_030612, exon 3 of 14)	101	NM_001159394	Mm.247272	NM_030612	ENSMUSG00000035356	Nfkbiz	AA408868|INAP|Mail	nuclear factor of kappa light polypeptide gene enhancer in B cells inhibitor, zeta	protein-coding	Nfkbiz	10439936	1	0.785093	12	4	0.153732	5.95564	6.17305	6.01878	6.01446	6.07652	6.03252
80914	chr1-689	chr1	167284643	167284913	+	11.7	0.6	exon (NM_030724, exon 1 of 7)	exon (NM_030724, exon 1 of 7)	349	NM_030724	Mm.280895	NM_030724	ENSMUSG00000026558	Uck2	AA407809|AI481316|AU018180|AU020720|TSA903|UK|UMK|Umpk	uridine-cytidine kinase 2	protein-coding	Uck2	10359851	0.271867	0.0257197	24	19.5	0.128234	556.86	467.541	457.856	501.109	502.73	537.932
67943	chr7-662	chr7	83951398	83951668	+	13.1	0.606	exon (NM_030728, exon 22 of 29)	exon (NM_030728, exon 22 of 29)	59533	NM_023403	Mm.117365	NM_023403	ENSMUSG00000038503	Mesdc2	2210015O11Rik|AW537813|mKIAA0081|mesd|msd	mesoderm development candidate 2	protein-coding	Mesdc2	10554704	1	0.998554	12	2.5	0	376.292	378.429	384.383	371.156	365.052	354.305
80987	chr9-155	chr9	108808490	108808760	+	19.7	0.627	exon (NM_030729, exon 1 of 13)	exon (NM_030729, exon 1 of 13)	245	NM_030729	Mm.192416	NM_030729	ENSMUSG00000032598	Nckipsd	AF3P21|DIP1|ORF1|SPIN90|WASLBP|WISH|Wasbp	NCK interacting protein with SH3 domain	protein-coding	Nckipsd	10589113	1	1	20	6.83333	0.0028355	108.661	105.25	100.664	105.589	106.972	98.8651
81535	chr12-438	chr12	75734905	75735175	+	12.4	0.71	exon (NM_030750, exon 1 of 3)	exon (NM_030750, exon 1 of 3)	689	NM_030750	Mm.280199	NM_030750	ENSMUSG00000021054	Sgpp1	AI463453|SPP|SPP1|Spph1	sphingosine-1-phosphate phosphatase 1	protein-coding	Sgpp1	10401028	1	1	20	4.5	0.0253466	342.339	357.404	321.062	328.634	331.2	337.551
81702	chr5-172	chr5	90365533	90365803	+	18.2	0.574	exon (NM_030886, exon 1 of 34)	exon (NM_030886, exon 1 of 34)	517	NM_030886	Mm.245522	NM_030886	ENSMUSG00000055204	Ankrd17	4933425K22Rik|A130069E23Rik|A930008M01|AA407558|AA516750|AU040470|Foe|Gtar|Mask|mKIAA0697	ankyrin repeat domain 17	protein-coding	Ankrd17	10531215	1	0.693388	12	1	0.0635548	970.289	944.62	960.053	995.019	979.791	938.192
83703	chr9-160	chr9	99575838	99576108	+	19.7	0.635	exon (NM_031403, exon 1 of 8)	exon (NM_031403, exon 1 of 8)	174	NM_031403	Mm.31324	NM_031403	ENSMUSG00000032469	Dbr1	AW018415	debranching RNA lariats 1	protein-coding	Dbr1	10588121	1	1	20	9.16667	0.0171536	39.2557	41.1163	41.7887	40.4091	39.7477	42.5153
192192	chr7-537	chr7	27361465	27361735	+	12.4	0.588	exon (NM_032610, exon 33 of 36)	exon (NM_032610, exon 33 of 36)	-5592	NM_138676	Mm.21297	NM_138676	ENSMUSG00000089832	Shkbp1	B930062H15Rik|Sb1	Sh3kbp1 binding protein 1	protein-coding	Shkbp1	10561247	0.505682	0.0762022	12	4	0.0455518	73.1624	75.4103	69.2561	72.9512	75.5395	77.7273
94043	chr4-816	chr4	98382941	98383211	+	11.7	0.742	exon (NM_053157, exon 1 of 7)	exon (NM_053157, exon 1 of 7)	189	NM_053157	Mm.331719	NM_053157	ENSMUSG00000028563	Tm2d1	2310026L18Rik|AA990549|Bbp	TM2 domain containing 1	protein-coding	Tm2d1	10514568	0.146865	0.00939007	12	2	0.0772797	956.798	920.836	886.994	969.092	947.696	909.5
94089	chr11-1528	chr11	48845458	48845728	+	11.7	0.81	exon (NM_053166, exon 3 of 7)	exon (NM_053166, exon 3 of 7)	7588	NM_001347436	Mm.390335	NM_053166	ENSMUSG00000040350	Trim7	AI790312	tripartite motif-containing 7	protein-coding	Trim7	10375503	0.414115	0.0493962	24	17	0.0867549	7.64231	7.51059	7.5406	7.63387	7.65908	7.75938
94091	chr11-35	chr11	58981888	58982158	+	38.6	0.644	exon (NM_053168, exon 3 of 6)	exon (NM_053168, exon 3 of 6)	3930	NM_001290988	Mm.248049	NM_053168	ENSMUSG00000020455	Trim11	-	tripartite motif-containing 11	protein-coding	Trim11	10376461	1	1	20	14.1667	0.0181444	7.33454	7.39951	7.41756	7.40268	7.41496	7.38839
94092	chr11-164	chr11	62820708	62820978	+	21.9	0.607	exon (NM_053169, exon 1 of 6)	exon (NM_053169, exon 1 of 6)	590	NM_053169	Mm.117087	NM_053169	ENSMUSG00000047821	Trim16	9130006M08Rik|AI482483|EBBP	tripartite motif-containing 16	protein-coding	Trim16	10376899	0.111763	0.00609984	24	16	0.0808506	525.691	433.976	506.922	537.723	543.381	554.606
94221	chr10-394	chr10	52381548	52381818	+	14.6	0.707	exon (NM_053187, exon 1 of 8)	exon (NM_053187, exon 1 of 8)	441	NM_001199272	Mm.390258	NM_053187	ENSMUSG00000019861	Gopc	2210402P09Rik|AI844555|CAL|FIG|GOPC1|PIST	golgi associated PDZ and coiled-coil motif containing	protein-coding	Gopc	10369086	0.786454	0.171619	12	1	0.0629749	7.43396	7.47999	7.44352	7.64187	7.50762	7.47569
107934	chr9-370	chr9	108826974	108827244	+	15.3	0.75	exon (NM_080437, exon 1 of 35)	exon (NM_080437, exon 1 of 35)	789	NM_080437	Mm.39945	NM_080437	ENSMUSG00000023473	Celsr3	Adgrc3|Fmi1|flamingo|mKIAA0812	cadherin, EGF LAG seven-pass G-type receptor 3	protein-coding	Celsr3	10589130	1	1	20	10.5	0.000700036	31.8968	33.6898	30.5276	33.0537	27.923	36.0481
170759	chr8-689	chr8	69791284	69791554	+	12.4	0.543	exon (NM_133224, exon 1 of 26)	exon (NM_133224, exon 1 of 26)	256	NM_133224	Mm.186066	NM_133224	ENSMUSG00000031862	Atp13a1	Atp13a|Cgi152|catp	ATPase type 13A1	protein-coding	Atp13a1	10572180	1	1	20	9.5	0.0134052	160.503	167.015	165.262	160.834	147.475	162.212
170767	chr3-470	chr3	54807289	54807559	+	12.4	0.487	exon (NM_133231, exon 1 of 3)	exon (NM_133231, exon 1 of 3)	367	NM_133231	Mm.185735	NM_133231	ENSMUSG00000036615	Rfxap	5730495K23Rik	regulatory factor X-associated protein	protein-coding	Rfxap	10498180	0.34014	0.0374712	12	5.5	0.0386257	190.795	178.47	195.728	207.145	191.521	182.842
12490	chr1-1187	chr1	194938866	194939136	+	10.2	0.833	exon (NM_133654, exon 1 of 8)	exon (NM_133654, exon 1 of 8)	180	NM_001111059	Mm.29798	NM_133654	ENSMUSG00000016494	Cd34	AU040960	CD34 antigen	protein-coding	Cd34	10352905	0.215927	0.0173912	24	12	0.110676	9.86763	10.0435	10.0328	10.0987	10.026	9.73536
67247	chr1-139	chr1	184845567	184845837	+	21.9	0.607	exon (NM_133684, exon 1 of 8)	exon (NM_133684, exon 1 of 8)	145	NM_133684	Mm.177724	NM_133684	ENSMUSG00000073481	2017-03-02	2810484M10Rik|Mosc2|mARC1	mitochondrial amidoxime reducing component 2	protein-coding	Mosc2	10360848	1	1	20	10.5	0.0374971	8.1658	8.1553	8.14271	8.03495	8.09167	8.30854
117197	chr5-194	chr5	36748230	36748500	+	18.2	0.611	exon (NM_133724, exon 1 of 1)	exon (NM_133724, exon 1 of 1)	314	NM_133724	Mm.46744	NM_133724	ENSMUSG00000060708	Bloc1s4	2610101N07Rik|Blos4|Cno	biogenesis of lysosomal organelles complex-1, subunit 4, cappuccino	protein-coding	Cno	10529577	0.505682	0.0762022	12	0	0.0260781	6.10554	5.84869	5.87216	6.02219	5.9361	5.98285
70394	chr7-3	chr7	16119990	16120260	+	105	0.83	exon (NM_133727, exon 1 of 12)	exon (NM_133727, exon 1 of 12)	249	NM_133727	Mm.41101	NM_133727	ENSMUSG00000006021	Kptn	2310042D10Rik|2E4|C030013F01Rik	kaptin	protein-coding	Kptn	10550250	0.0833197	0.00389482	12	0	0.163518	150.685	126.004	142.033	139.174	133.351	138.615
71835	chr6-347	chr6	57703058	57703328	+	14.6	0.615	exon (NM_133737, exon 1 of 9)	exon (NM_133737, exon 1 of 9)	738	NM_133737	Mm.274904	NM_133737	ENSMUSG00000062190	Lancl2	1700003F10Rik	LanC (bacterial lantibiotic synthetase component C)-like 2	protein-coding	Lancl2	10538617	0.460888	0.0641441	24	15	0.105401	301.909	292.899	334.238	333.899	342.647	341.637
71914	chr5-566	chr5	98030356	98030626	+	12.4	0.622	exon (NM_133738, exon 1 of 17)	exon (NM_133738, exon 1 of 17)	471	NM_133738	Mm.24842	NM_133738	ENSMUSG00000029338	Antxr2	2310046B19Rik|AW561899|CMG-2|CMG2|cI-35	anthrax toxin receptor 2	protein-coding	Antxr2	10531560	0.0712878	0.00309146	24	9	0.196569	352.051	457.406	417.974	411.537	369.167	334.882
98238	chr11-1089	chr11	94629929	94630199	+	11.7	0.594	exon (NM_133807, exon 1 of 7)	exon (NM_133807, exon 1 of 7)	240	NM_133807	Mm.172720	NM_133807	ENSMUSG00000020869	Lrrc59	AA959742|C78668	leucine rich repeat containing 59	protein-coding	Lrrc59	10380403	0.460888	0.0641441	12	1	0	448.747	422.697	421.129	441.935	431.737	415.024
98878	chr2-344	chr2	120154253	120154523	+	16	0.5	exon (NM_133838, exon 1 of 6)	exon (NM_133838, exon 1 of 6)	187	NM_133838	Mm.132226	NM_133838	ENSMUSG00000027293	Ehd4	2210022F10Rik|AI197390|AI846352|AV006278|Past2	EH-domain containing 4	protein-coding	Ehd4	10486396	0.66424	0.125235	24	10	0.156702	275.145	286.508	299.794	333.539	265.686	253.384
100561	chr5-271	chr5	127617125	127617395	+	17.5	0.604	exon (NM_133895, exon 1 of 8)	exon (NM_133895, exon 1 of 8)	132	NM_133895	Mm.28506	NM_133895	ENSMUSG00000029416	Slc15a4	AA987064|AW742963|C130069N12Rik|PHT1|PTR4	solute carrier family 15, member 4	protein-coding	Slc15a4	10533993	1	0.693388	24	5	6.28e-16	225.673	278.565	256.6	249.468	254.572	238.582
70693	chr5-909	chr5	50058433	50058703	+	10.9	0.677	exon (NM_133911, exon 1 of 19)	exon (NM_133911, exon 1 of 19)	428	NM_133911	Mm.272974	NM_133911	ENSMUSG00000029090	Adgra3	3830613O22Rik|AU044632|Gpr125|Tem5-like	adhesion G protein-coupled receptor A3	protein-coding	Gpr125	10529957	0.852649	0.199965	24	9	0.00328805	8.00745	7.91727	8.08415	8.1526	8.03436	7.94468
68272	chr6-721	chr6	29164438	29164708	+	11.7	0.731	exon (NM_133925, exon 1 of 19)	exon (NM_133925, exon 1 of 19)	151	NM_133925	Mm.40802	NM_026650	ENSMUSG00000029701	Rbm28	2810480G15Rik|AI503051	RNA binding motif protein 28	protein-coding	Rbm28	10543551	1	0.31062	12	2	0	7.05998	6.93287	7.11218	7.15938	7.12017	7.17644
101142	chr6-90	chr6	128424665	128424935	+	23.3	0.557	exon (NM_133927, exon 1 of 12)	exon (NM_133927, exon 1 of 12)	110	NM_133927	Mm.31345	NM_133927	ENSMUSG00000001518	Itfg2	2700050P07Rik|AI646725	integrin alpha FG-GAP repeat containing 2	protein-coding	Itfg2	10548180	0.786454	0.171619	12	11	0.1449	232.867	202.032	202.287	219.424	206.106	237.618
103963	chr6-449	chr6	88084501	88084771	+	13.1	0.652	exon (NM_133933, exon 1 of 10)	exon (NM_133933, exon 1 of 10)	163	NM_133933	Mm.188544	NM_133933	ENSMUSG00000030062	Rpn1	AU018702|D6Wsu137e|Rpn-1	ribophorin I	protein-coding	Rpn1	10539861	1	1	20	7.16667	0.00163892	444.26	445.753	426.946	460.798	455.072	438.283
16068	chr7-84	chr7	102001221	102001491	+	24.8	0.735	exon (NM_133947, exon 14 of 25)	exon (NM_133947, exon 14 of 25)	16799	NM_010531	Mm.422756	NM_010531	ENSMUSG00000070427	Il18bp	IL-18BP|Igifbp|MC54L	interleukin 18 binding protein	protein-coding	Il18bp	10566050	1	0.31062	12	8	0.0714956	112.769	112.37	120.528	116.824	112.398	114.418
102462	chr9-289	chr9	56937535	56937805	+	16.8	0.628	exon (NM_133976, exon 1 of 1)	exon (NM_133976, exon 1 of 1)	170	NM_133976	Mm.12864	NM_133976	ENSMUSG00000032288	Imp3	1190002L16Rik|AI256594	IMP3, U3 small nucleolar ribonucleoprotein	protein-coding	Imp3	10585599	1	1	20	11.1667	0.0254739	1051.84	1057.18	995.357	998.896	1038.22	1009.6
103140	chr10-358	chr10	75780734	75781004	+	16	0.628	exon (NM_133994, exon 1 of 5)	exon (NM_133994, exon 1 of 5)	545	NM_133994	Mm.5731	NM_133994	ENSMUSG00000001665	Gstt3	AI118089	glutathione S-transferase, theta 3	protein-coding	Gstt3	10369993	1	1	20	9.16667	0.0237596	73.7586	65.5889	75.0734	79.2127	71.2368	66.2859
104570	chr11-663	chr11	29173218	29173488	+	16	0.722	exon (NM_134034, exon 1 of 16)	exon (NM_134034, exon 1 of 16)	446	NM_134034	Mm.276386	NM_134034	ENSMUSG00000020463	Smek2	AW011752|AW557776|Ppp4r3b|mKIAA1387	SMEK homolog 2, suppressor of mek1 (Dictyostelium)	protein-coding	Smek2	10374821	0.852649	0.199965	24	7	0.0888055	411.087	497.799	421.179	468.911	416.441	400.087
107239	chr19-42	chr19	4169454	4169724	+	24.1	0.709	exon (NM_134148, exon 9 of 10)	exon (NM_134148, exon 9 of 10)	5890	NM_134148	Mm.482310	NM_134148	ENSMUSG00000075289	Carns1	AI790298|Atpgd1|mKIAA1394	carnosine synthase 1	protein-coding	Carns1	10464642	1	1	20	8.83333	0.0147754	354.126	290.246	340.122	329.901	299.078	324.62
171282	chr12-530	chr12	84038593	84038863	+	10.9	0.571	exon (NM_134247, exon 1 of 3)	exon (NM_134247, exon 1 of 3)	349	NM_134247	Mm.482217	NM_134247	ENSMUSG00000052392	Acot4	B430212I04Rik|PTE-Ib|Pte1b|Pte2b	acyl-CoA thioesterase 4	protein-coding	Acot4	10397153	0.852649	0.199965	12	7	0.148203	25.3368	26.3418	28.5647	24.1154	26.9124	27.5582
28077	chr13-868	chr13	69809850	69810120	+	10.2	0.6	exon (NM_138596, exon 1 of 4)	exon (NM_138596, exon 1 of 4)	103	NM_138596	Mm.52583	NM_138596	ENSMUSG00000021598	Med10	AA959813|AI385605|C78613|D13Wsu50e	mediator complex subunit 10	protein-coding	Med10	10405994	1	1	20	11.8333	0.00928903	144.189	177.179	178.203	170.786	161.572	168.099
28185	chr16-421	chr16	57121742	57122012	+	9.48	0.6	exon (NM_138599, exon 1 of 12)	exon (NM_138599, exon 1 of 12)	163	NM_138599	Mm.196933	NM_138599	ENSMUSG00000022752	Tomm70a	2610044B22Rik|D16Ium22|D16Ium22e|D16Wsu109e|Tom70|Tomm70|mKIAA0719	translocase of outer mitochondrial membrane 70 homolog A (yeast)	protein-coding	Tomm70a	10436348	1	0.886572	12	0	0.134103	465.065	416.603	431.005	453.765	429.683	423.571
108160	chrX-45	chrX	74313117	74313387	+	12.4	0.778	exon (NM_138607, exon 1 of 13)	exon (NM_138607, exon 1 of 13)	219	NM_138607	Mm.4370	NM_138607	ENSMUSG00000001962	Fam50a	D0HXS9928E|XAP-5	family with sequence similarity 50, member A	protein-coding	Fam50a	10600403	0.555588	0.0902228	12	1	0.042087	144.786	132.682	142.328	145.067	144.02	124.851
103466	chr10-45	chr10	86890664	86890934	+	26.2	0.725	exon (NM_138673, exon 41 of 69)	exon (NM_138673, exon 41 of 69)	111794	NM_175331	Mm.200446	NM_175331	ENSMUSG00000054027	Nt5dc3	AU040402|AW540062|C630002B14Rik|TU12B1-TY	5'-nucleotidase domain containing 3	protein-coding	Nt5dc3	10365518	1	1	20	6.83333	0	1162.17	1041.97	1057.91	1047.98	1024.5	1111.27
20324	chr1-798	chr1	51289408	51289678	+	11.7	0.559	exon (NM_138741, exon 1 of 2)	exon (NM_138741, exon 1 of 2)	417	NM_138741	Mm.398690	NM_138741	ENSMUSG00000045954	Sdpr	-	serum deprivation response	protein-coding	Sdpr	10346164	0.271867	0.0257197	24	7	0.113194	190.243	229.971	228.008	230.994	191.974	190.603
231130	chr5-531	chr5	34513535	34513805	+	13.9	0.532	exon (NM_139064, exon 1 of 6)	exon (NM_139064, exon 1 of 6)	309	NM_139064	Mm.28615	NM_139064	ENSMUSG00000059866	Tnip2	1810020H16Rik|ABIN-2|AI428870	TNFAIP3 interacting protein 2	protein-coding	Tnip2	10529402	1	1	20	10.8333	0.035672	77.4106	80.8043	80.4924	85.7384	81.7411	88.9807
22599	chr9-1318	chr9	123641638	123641908	+	8.75	0.882	exon (NM_139142, exon 8 of 11)	exon (NM_139142, exon 8 of 11)	-9208	NM_011731	Mm.41963	NM_011731	ENSMUSG00000025243	Slc6a20b	AA986306|Sit1|Slc6a20|XT3|Xtrp3	solute carrier family 6 (neurotransmitter transporter), member 20B	protein-coding	Slc6a20b	10597949	1	1	20	11.8333	0.00317884	75.4323	73.9742	73.5498	68.5607	80.4422	74.0291
17846	chr11-463	chr11	22982007	22982277	+	16	0.619	exon (NM_144514, exon 1 of 3)	exon (NM_144514, exon 1 of 3)	142	NM_144514	Mm.259903	NM_144514	ENSMUSG00000051355	Commd1	AI256843|Murr1|U2/Mu	COMM domain containing 1	protein-coding	Commd1	10384662	0.994691	0.269008	12	1	0.0272731	68.4714	66.9713	66.0149	73.2167	56.7088	67.1223
52521	chr15-286	chr15	25985039	25985309	+	14.6	0.619	exon (NM_144523, exon 1 of 6)	exon (NM_144523, exon 1 of 6)	808	NM_144523	Mm.29145	NM_144523	ENSMUSG00000052253	Zfp622	1110033B05Rik|D15Ertd806e|ZPR9|Znf622	zinc finger protein 622	protein-coding	Zfp622	10423346	1	1	20	11.1667	0.0175009	243.62	218.903	224.144	233.492	240.429	271.926
108150	chr8-520	chr8	57652741	57653011	+	13.9	0.625	exon (NM_144731, exon 1 of 12)	exon (NM_144731, exon 1 of 12)	179	NM_144731	Mm.62886	NM_144731	ENSMUSG00000031608	Galnt7	AI225872	UDP-N-acetyl-alpha-D-galactosamine: polypeptide N-acetylgalactosaminyltransferase 7	protein-coding	Galnt7	10578771	1	0.886572	12	2	0.168235	104.523	117.239	99.3825	109.261	101.543	115.196
208638	chr9-280	chr9	120110368	120110638	+	17.5	0.692	exon (NM_144793, exon 1 of 7)	exon (NM_144793, exon 1 of 7)	104	NM_144793	Mm.236656	NM_144793	ENSMUSG00000032519	Slc25a38	AV019094|BC010801|appoptosin	solute carrier family 25, member 38	protein-coding	Slc25a38	10590245	1	1	20	8.16667	0.00783789	336.604	335.514	327.931	321.187	331.549	350.585
225164	chr18-249	chr18	10726333	10726603	+	13.1	0.667	exon (NM_144860, exon 1 of 21)	exon (NM_144860, exon 1 of 21)	843	NM_144860	Mm.21500	NM_144860	ENSMUSG00000024294	Mib1	DIP-1|E430019M12Rik|Mib|mKIAA1323	mindbomb E3 ubiquitin protein ligase 1	protein-coding	Mib1	10453830	1	0.410551	12	1	0.097206	211.633	233.19	213.846	226.439	231.855	226.039
226422	chr1-839	chr1	131867563	131867833	+	10.9	0.606	exon (NM_144875, exon 2 of 6)	exon (NM_144875, exon 2 of 6)	421	NM_144875	Mm.34027	NM_144875	ENSMUSG00000026433	Rab29	Rab7l1	RAB29, member RAS oncogene family	protein-coding	Rab7l1	10349724	1	0.536501	18	3.5	0.0473019	6.53106	6.57773	6.47193	6.56062	6.35257	6.50622
30931	chr2-207	chr2	30967612	30967882	+	17.5	0.609	exon (NM_144884, exon 1 of 5)	exon (NM_144884, exon 1 of 5)	171	NM_144884	Mm.154994	NM_144884	ENSMUSG00000026849	Tor1a	DQ2|Dyt1|torsinA	torsin family 1, member A (torsin A)	protein-coding	Tor1a	10481525	1	1	20	12.1667	0.0318552	131.062	122.463	126.773	127.62	137.799	128.814
229524	chr3-164	chr3	88913712	88913982	+	16.8	0.681	exon (NM_144898, exon 1 of 14)	exon (NM_144898, exon 1 of 14)	103	NM_144898	Mm.440405	NM_144898	ENSMUSG00000068922	Msto1	BC008103|mst	misato 1, mitochondrial distribution and morphology regulator	protein-coding	Msto1	10499438	1	0.998554	24	16	0.0617658	169.406	146.463	149.621	161.65	168.357	146.135
70726	chr9-56	chr9	20878061	20878331	+	30.6	0.61	exon (NM_145154, exon 2 of 6)	exon (NM_145154, exon 2 of 6)	1514	NM_145154	Mm.34019	NM_145154	ENSMUSG00000038742	Angptl6	6330404E11Rik|AGF|ARP3|Arp5	angiopoietin-like 6	protein-coding	Angptl6	10591350	1	1	20	11.1667	0.0242483	80.6376	75.5594	71.2052	68.6073	76.364	80.6454
319554	chr13-128	chr13	8885726	8885996	+	17.5	0.638	exon (NM_145360, exon 1 of 5)	exon (NM_145360, exon 1 of 5)	255	NM_145360	Mm.29847	NM_145360	ENSMUSG00000058258	Idi1	4832416K17Rik	isopentenyl-diphosphate delta isomerase	protein-coding	Idi1	10403413	0.34014	0.0374712	24	7	0.0646366	82.9396	87.0595	100.728	89.7201	87.2298	84.2118
208198	chr10-78	chr10	80656052	80656322	+	24.1	0.656	exon (NM_145361, exon 1 of 9)	exon (NM_145361, exon 1 of 9)	884	NM_145361	Mm.60720	NM_145361	ENSMUSG00000003344	Btbd2	2610037C03Rik|4930512K17Rik	BTB (POZ) domain containing 2	protein-coding	Btbd2	10370920	0.271867	0.0257197	12	1	0.0786586	442.088	415.099	409.282	456.81	426.68	424.983
213539	chr1-526	chr1	33757487	33757757	+	12.4	0.697	exon (NM_145392, exon 1 of 3)	exon (NM_145392, exon 1 of 3)	128	NM_145392	Mm.247037	NM_145392	ENSMUSG00000042215	Bag2	2610042A13Rik|BC016230	BCL2-associated athanogene 2	protein-coding	Bag2	10353750	1	1	20	9.16667	0.0921077	107.04	100.6	125.131	116.485	114.478	106.575
100609	chr5-308	chr5	135369921	135370191	+	17.5	0.711	exon (NM_145414, exon 1 of 10)	exon (NM_145414, exon 1 of 10)	103	NM_145414	Mm.281189	NM_145414	ENSMUSG00000000916	Nsun5	9830109N13Rik|AI326939|Nol1r|Wbscr20|Wbscr20a	NOL1/NOP2/Sun domain family, member 5	protein-coding	Nsun5	10526345	1	0.357622	12	11	0.0825618	71.0203	55.7419	59.9734	59.0666	61.3763	61.9731
215193	chr1-183	chr1	193129996	193130266	+	19.7	0.636	exon (NM_145415, exon 1 of 12)	exon (NM_145415, exon 1 of 12)	120	NM_145415	Mm.173758	NM_145415	ENSMUSG00000016181	Diexf	AA408296|AW045375|Def	digestive organ expansion factor homolog (zebrafish)	protein-coding	Diexf	10361200	1	1	20	11.8333	0.0424146	159.037	156.877	140.468	156.748	153.985	156.612
217369	chr11-67	chr11	121161100	121161370	+	32.8	0.662	exon (NM_145440, exon 1 of 1)	exon (NM_145440, exon 1 of 1)	964	NM_145440	Mm.20122	NM_145440	ENSMUSG00000039321	Uts2r	Gpr14|UR-2-R|UTR|UTR2	urotensin 2 receptor	protein-coding	Uts2r	10383514	0.304521	0.0311014	12	9	0.103414	129.254	103.857	120.154	107.36	115.516	142.069
218397	chr13-260	chr13	85288375	85288645	+	13.9	0.564	exon (NM_145452, exon 1 of 25)	exon (NM_145452, exon 1 of 25)	976	NM_145452	Mm.259653	NM_145452	ENSMUSG00000021549	Rasa1	Gap|RasGAP|Rasa	RAS p21 protein activator 1	protein-coding	Rasa1	10410892	0.505682	0.0762022	12	2	0.171735	314.274	354.175	289.637	368.635	318.114	304.121
219134	chr14-59	chr14	59626118	59626388	+	21.9	0.611	exon (NM_145463, exon 1 of 2)	exon (NM_145463, exon 1 of 2)	972	NM_145463	Mm.275409	NM_145463	ENSMUSG00000044461	Shisa2	9430059P22Rik|MAd2|Tmem46|mShisa|shisa	shisa family member 2	protein-coding	Shisa2	10415693	0.0043622	5.2e-05	24	4	0.116842	576.893	576.441	529.211	478.226	452.395	471.822
97998	chr15-32	chr15	55112459	55112729	+	29.2	0.746	exon (NM_145470, exon 1 of 9)	exon (NM_145470, exon 1 of 9)	277	NM_145470	Mm.295397	NM_145470	ENSMUSG00000022419	Deptor	Depdc6	DEP domain containing MTOR-interacting protein	protein-coding	Deptor	10424126	1	0.886572	12	4	0	869.282	775.73	688.012	753.801	800.784	752.339
226591	chr1-404	chr1	165236623	165236893	+	15.3	0.622	exon (NM_145513, exon 1 of 7)	exon (NM_145513, exon 1 of 7)	200	NM_145513	Mm.21520	NM_145513	ENSMUSG00000040843	Tiprl	1810011K17Rik	TIP41, TOR signalling pathway regulator-like (S. cerevisiae)	protein-coding	Tiprl	10359723	0.723213	0.146835	12	1	0	221.999	253.301	252.217	262.692	247.831	220.35
227721	chr2-87	chr2	32095688	32095958	+	22.6	0.542	exon (NM_145521, exon 1 of 2)	exon (NM_145521, exon 1 of 2)	172	NM_145521	Mm.257236	NM_145521	ENSMUSG00000051373	Plpp7	D830019K17Rik|NET39|Ppapdc3	phospholipid phosphatase 7 (inactive)	protein-coding	Ppapdc3	10471294	1	0.785093	12	1	0.0575161	9.92598	9.74315	9.64327	9.73477	9.64828	9.72362
228543	chr2-1369	chr2	119270970	119271240	+	8.75	0.789	exon (NM_145530, exon 1 of 3)	exon (NM_145530, exon 1 of 3)	121	NM_145530	Mm.120274	NM_145530	ENSMUSG00000034226	Rhov	A030005A06Rik|Arhv	ras homolog family member V	protein-coding	Rhov	10486197	1	1	20	13.8333	0.00758726	38.1711	36.1279	36.4693	34.3025	38.8871	37.1822
214585	chr2-138	chr2	122118081	122118351	+	19.7	0.618	exon (NM_145531, exon 1 of 40)	exon (NM_145531, exon 1 of 40)	170	NM_145531	Mm.222303	NM_145531	ENSMUSG00000033396	Spg11	6030465E24Rik|A330015I11|C530005A01Rik	spastic paraplegia 11	protein-coding	Spg11	10486898	1	1	20	11.5	0.00283864	113.626	114.527	116.216	111.499	112.24	114.563
108687	chr2-560	chr2	155729197	155729467	+	15.3	0.657	exon (NM_145537, exon 1 of 11)	exon (NM_145537, exon 1 of 11)	143	NM_145537	Mm.273706	NM_145537	ENSMUSG00000038312	Edem2	9530090G24Rik|AI327354	ER degradation enhancer, mannosidase alpha-like 2	protein-coding	Edem2	10488912	1	0.536501	24	5	6.28e-16	74.3087	78.8102	74.7085	75.7256	78.7337	73.1553
232087	chr6-89	chr6	72439288	72439558	+	24.1	0.563	exon (NM_145569, exon 1 of 9)	exon (NM_145569, exon 1 of 9)	135	NM_145569	Mm.29815	NM_145569	ENSMUSG00000053907	Mat2a	D630045P18Rik	methionine adenosyltransferase II, alpha	protein-coding	Mat2a	10545417	0.0373613	0.00117065	24	18	0.141916	3452.92	2918.68	2981.45	3558.37	3722.1	3760.22
233802	chr7-591	chr7	119720446	119720716	+	13.9	0.541	exon (NM_145585, exon 1 of 4)	exon (NM_145585, exon 1 of 4)	217	NM_145585	Mm.26392	NM_145585	ENSMUSG00000030942	Thumpd1	6330575P11Rik	THUMP domain containing 1	protein-coding	Thumpd1	10567407	0.505682	0.0762022	24	13	0.152148	67.892	59.5583	69.1257	83.2207	75.8186	67.5381
110606	chr12-84	chr12	76837495	76837765	+	20.4	0.661	exon (NM_145927, exon 1 of 12)	exon (NM_145927, exon 1 of 12)	163	NM_145927	Mm.151174	NM_145927	ENSMUSG00000033373	Fntb	2010013E13Rik|AA409500	farnesyltransferase, CAAX box, beta	protein-coding	Fntb	10396699	1	0.693388	24	14	0.0422001	117.565	98.7535	106.361	109.736	107.529	110.336
58911	chr6-432	chr6	108185332	108185602	+	12.4	0.606	exon (NM_145937, exon 1 of 9)	exon (NM_145937, exon 1 of 9)	116	NM_145937	Mm.439876	NM_145937	ENSMUSG00000030101	Sumf1	AA543204|AI463102|AI851573|FGE	sulfatase modifying factor 1	protein-coding	Sumf1	10546791	1	1	20	10.1667	0.0157991	159.772	181.497	172.138	191.262	167.067	172.94
209478	chr19-415	chr19	38836629	38836899	+	12.4	0.697	exon (NM_145952, exon 1 of 13)	exon (NM_145952, exon 1 of 13)	185	NM_145952	Mm.391153	NM_145952	ENSMUSG00000048720	Tbc1d12	BC033574	TBC1D12: TBC1 domain family, member 12	protein-coding	Tbc1d12	10462957	1	1	20	6.16667	0.00220067	112.8	138.045	121.115	135.727	122.503	130.227
211922	chr14-359	chr14	26579674	26579944	+	11.7	0.576	exon (NM_145969, exon 1 of 18)	exon (NM_145969, exon 1 of 18)	259	NM_145969	Mm.260512	NM_145969	ENSMUSG00000040818	Dennd6a	Fam116a	DENN/MADD domain containing 6A	protein-coding	Fam116a	10413282	0.922182	0.232281	12	1	0.0407081	7.20305	7.41225	7.38323	7.41999	7.39114	7.36636
226977	chr1-377	chr1	36709684	36709954	+	16	0.61	exon (NM_146107, exon 1 of 11)	exon (NM_146107, exon 1 of 11)	106	NM_146107	Mm.28521	NM_146107	ENSMUSG00000037351	Actr1b	2310066K23Rik|AA960180|AI851923|Arp1b	ARP1 actin-related protein 1B, centractin beta	protein-coding	Actr1b	10353934	0.304521	0.0311014	12	0.5	0.0143543	420.057	431.079	414.187	462.42	401.445	400.814
230598	chr4-591	chr4	109000859	109001129	+	13.1	0.513	exon (NM_146150, exon 1 of 31)	exon (NM_146150, exon 1 of 31)	189	NM_146150	Mm.274950	NM_146150	ENSMUSG00000053510	Nrd1	2600011I06Rik|AI875733|NRD-C|Nrdc	nardilysin, N-arginine dibasic convertase, NRD convertase 1	protein-coding	Nrd1	10506893	0.167635	0.011578	12	1	0.0155563	2345.37	2360.05	2281.71	2434.99	2341.63	2257.48
232023	chr6-568	chr6	57824809	57825079	+	11.7	0.488	exon (NM_146168, exon 1 of 5)	exon (NM_146168, exon 1 of 5)	181	NM_146168	Mm.24642	NM_146168	ENSMUSG00000037788	Vopp1	AW146242|Ecop	vesicular, overexpressed in cancer, prosurvival protein 1	protein-coding	Vopp1	10545014	1	1	20	9.16667	0.0581281	50.4723	48.8095	52.538	55.2239	55.6473	39.0213
69217	chr7-742	chr7	45538176	45538446	+	12.4	0.667	exon (NM_148927, exon 8 of 20)	exon (NM_148927, exon 8 of 20)	11981	NM_148927	Mm.274158	NM_148927	ENSMUSG00000040428	Plekha4	2410005C22Rik|C88169|Pepp1	pleckstrin homology domain containing, family A (phosphoinositide binding specific) member 4	protein-coding	Plekha4	10552982	1	1	20	13.5	0.0149561	60.8835	54.904	59.4008	57.5239	58.4252	60.9502
76130	chrX-176	chrX	95956703	95956973	+	8.02	0.65	exon (NM_152822, exon 1 of 13)	exon (NM_152822, exon 1 of 13)	136	NM_152822	Mm.274318	NM_152822	ENSMUSG00000057421	Las1l	1810030A06Rik|5830482G23Rik	LAS1-like (S. cerevisiae)	protein-coding	Las1l	10605831	1	0.785093	18	7.5	0.093826	196.709	199.35	206.369	229.954	222.821	218.814
231042	chr5-1524	chr5	24164992	24165262	+	9.48	0.63	exon (NM_153092, exon 1 of 7)	exon (NM_153092, exon 1 of 7)	164	NM_153092	Mm.45513	NM_153092	ENSMUSG00000048439	Nupl2	AV116043|CG1|NLP-1|Nlp1	nucleoporin like 2	protein-coding	Nupl2	10520111	0.922182	0.232281	24	15.5	0.148259	160.845	142.257	190.788	172.195	176.85	192.517
241490	chr2-1005	chr2	76370039	76370309	+	12.4	0.545	exon (NM_153405, exon 1 of 10)	exon (NM_153405, exon 1 of 10)	190	NM_153405	Mm.33310	NM_153405	ENSMUSG00000042369	Rbm45	Drb1|Drbp1|G430095G15Rik	RNA binding motif protein 45	protein-coding	Rbm45	10473045	1	1	20	7.83333	0.0109444	148.505	154.49	156.719	173.496	162.416	155.394
231070	chr5-174	chr5	28071455	28071725	+	20.4	0.63	exon (NM_153526, exon 1 of 5)	exon (NM_153526, exon 1 of 5)	178	NM_153526	Mm.30221	NM_153526	ENSMUSG00000045294	Insig1	1810013C12Rik|Insig-1	insulin induced gene 1	protein-coding	Insig1	10520362	0.00220262	1.94e-05	24	7	0.231981	246.965	335.321	327.656	311.541	287.435	239.511
103765	chr11-501	chr11	22512434	22512704	+	15.3	0.722	exon (NM_153596, exon 1 of 4)	exon (NM_153596, exon 1 of 4)	286	NM_153596	Mm.221274	NM_153596	ENSMUSG00000049904	Tmem17	AI503894|AW049890	transmembrane protein 17	protein-coding	Tmem17	10374553	1	0.357622	24	10	0	108.448	111.134	111.594	120.325	113.647	99.3853
208659	chr11-856	chr11	109721271	109721541	+	15.3	0.686	exon (NM_153782, exon 1 of 11)	exon (NM_153782, exon 1 of 11)	850	NM_153782	Mm.208662	NM_153782	ENSMUSG00000020614	Fam20a	AI606893	family with sequence similarity 20, member A	protein-coding	Fam20a	10392464	1	0.998554	12	8	0.06726	68.3496	61.2518	70.2643	61.5309	68.0102	61.0098
224814	chr17-168	chr17	46327769	46328039	+	17.5	0.659	exon (NM_170680, exon 1 of 21)	exon (NM_170680, exon 1 of 21)	119	NM_170680	Mm.76543	NM_145140	ENSMUSG00000032842	Abcc10	Mrp7|mFLJ00002	ATP-binding cassette, sub-family C (CFTR/MRP), member 10	protein-coding	Abcc10	10451261	0.66424	0.125235	24	18	0.0409415	6.3138	6.07326	6.1465	5.99069	6.1536	6.22876
211986	chr12-229	chr12	30584417	30584687	+	16.8	0.667	exon (NM_172049, exon 1 of 5)	exon (NM_172049, exon 1 of 5)	109	NM_172049	Mm.34035	NM_172049	ENSMUSG00000043061	Tmem18	BC024093	transmembrane protein 18	protein-coding	Tmem18	10395129	1	0.693388	12	11	0.0125229	256.325	253.198	254.727	275.961	270.063	273.071
28071	chr12-420	chr12	33429645	33429915	+	13.1	0.647	exon (NM_172253, exon 1 of 4)	exon (NM_172253, exon 1 of 4)	156	NM_172253	Mm.196472	NM_172253	ENSMUSG00000020561	Twistnb	2410173G11|2810024J17Rik|D16Wsu83e	twist basic helix-loop-helix transcription factor 1 neighbor	protein-coding	Twistnb	10395312	1	1	20	11.8333	0.0425835	158.417	148.679	175.118	170.242	185.625	198.125
207425	chr7-704	chr7	129591864	129592134	+	13.1	0.59	exon (NM_172255, exon 1 of 29)	exon (NM_172255, exon 1 of 29)	136	NM_172255	Mm.229323	NM_172255	ENSMUSG00000042055	Wdr11	2900055P10Rik|AW489876|Brwd2|mKIAA1351	WD repeat domain 11	protein-coding	Wdr11	10558057	0.608446	0.10647	12	1	0.055423	347.823	350.359	353.881	373.802	392.601	373.455
231834	chr5-270	chr5	140389032	140389302	+	17.5	0.55	exon (NM_172277, exon 1 of 11)	exon (NM_172277, exon 1 of 11)	141	NM_172277	Mm.27098	NM_172277	ENSMUSG00000029560	Snx8	B130023O14Rik	sorting nexin 8	protein-coding	Snx8	10535213	1	1	20	6.5	0.0431626	133.182	151.179	142.819	151.391	143.425	131.081
272396	chr7-584	chr7	65645009	65645279	+	15.3	0.7	exon (NM_172310, exon 1 of 19)	exon (NM_172310, exon 1 of 19)	246	NM_172310	Mm.35127	NM_172310	ENSMUSG00000030515	Tarsl2	A530046H20Rik	threonyl-tRNA synthetase-like 2	protein-coding	Tarsl2	10553935	1	0.610752	12	1	0.0805819	588.125	559.239	566.201	603.073	597.382	571.651
211798	chr1-630	chr1	40790395	40790665	+	12.4	0.613	exon (NM_172499, exon 1 of 6)	exon (NM_172499, exon 1 of 6)	127	NM_172499	Mm.235443	NM_172499	ENSMUSG00000041945	Mfsd9	4931419K03Rik	major facilitator superfamily domain containing 9	protein-coding	Mfsd9	10354220	0.608446	0.10647	12	8	0.128114	64.0466	51.5932	68.015	53.3061	60.9017	61.6654
212427	chr1-12	chr1	88277117	88277387	+	50.3	0.652	exon (NM_172505, exon 2 of 5)	exon (NM_172505, exon 2 of 5)	305	NM_172505	Mm.384762	NM_172505		A730008H23Rik	mFleg1	RIKEN cDNA A730008H23 gene	protein-coding	A730008H23Rik	10608671	1	1	20	8.5	0.0105477	7.32261	7.54782	7.50803	7.50147	7.485	7.4681
213452	chr1-293	chr1	132417514	132417784	+	16.8	0.585	exon (NM_172516, exon 1 of 13)	exon (NM_172516, exon 1 of 13)	196	NM_172516	Mm.257120	NM_172516	ENSMUSG00000042046	Dstyk	A930019K20Rik|C430014H23Rik|C820013G01|Ripk5	dual serine/threonine and tyrosine protein kinase	protein-coding	Dstyk	10349793	1	1	20	6.5	0.00229181	166.001	147.012	147.454	157.96	147.038	148.208
217194	chr11-550	chr11	100472406	100472676	+	15.3	0.596	exon (NM_172565, exon 1 of 2)	exon (NM_172565, exon 1 of 2)	241	NM_172565	Mm.183320	NM_172565	ENSMUSG00000048732	Klhl11	BC011167	kelch-like 11	protein-coding	Klhl11	10391143	0.418067	0.0538095	24	19.5	0.0988323	159.001	128.819	125.252	142.175	142.774	143.907
218460	chr13-179	chr13	95018054	95018324	+	16.8	0.818	exon (NM_172590, exon 11 of 13)	exon (NM_172590, exon 11 of 13)	41845	NM_172590	Mm.33856	NM_172590	ENSMUSG00000042015	Wdr41	B830029I03Rik|MSTP048	WD repeat domain 41	protein-coding	Wdr41	10406718	1	1	20	9.83333	0.0140714	547.073	556.767	567.018	575.184	608.701	592.536
228026	chr2-607	chr2	71873337	71873607	+	14.6	0.634	exon (NM_172665, exon 1 of 11)	exon (NM_172665, exon 1 of 11)	248	NM_172665	Mm.34411	NM_172665	ENSMUSG00000006494	Pdk1	B830012B01|D530020C15Rik	pyruvate dehydrogenase kinase, isoenzyme 1	protein-coding	Pdk1	10472846	0.128197	0.00758419	12	0	0.108258	404.667	382.639	408.46	493.122	420.17	400.714
229675	chr3-138	chr3	103914331	103914601	+	17.5	0.583	exon (NM_172684, exon 1 of 7)	exon (NM_172684, exon 1 of 7)	346	NM_172684	Mm.29366	NM_172684	ENSMUSG00000044098	Rsbn1	C230004D03Rik|E330004N01|Rosbin|Rsbn|Rsbp|mKIAA3002	rosbin, round spermatid basic protein 1	protein-coding	Rsbn1	10495001	1	1	20	6.16667	0.020426	240.815	264.316	250.9	247.461	243.077	256.178
235461	chr9-339	chr9	70656488	70656758	+	16.8	0.659	exon (NM_172772, exon 1 of 9)	exon (NM_172772, exon 1 of 9)	551	NM_172772	Mm.170855	NM_172772	ENSMUSG00000042444	Fam63b	AI465301|B230380D07Rik|mKIAA1164	family with sequence similarity 63, member B	protein-coding	Fam63b	10586842	1	0.785093	18	12.5	0.0593404	371.076	307.088	344.975	300.425	338.932	329.935
235504	chr9-513	chr9	78587741	78588011	+	14.6	0.649	exon (NM_172773, exon 1 of 11)	exon (NM_172773, exon 1 of 11)	169	NM_172773	Mm.46932	NM_172773	ENSMUSG00000049624	Slc17a5	4631416G20Rik|4732491M05|AST|ISSD|NSD|SD|SIALIN|SIASD|SLD	solute carrier family 17 (anion/sugar transporter), member 5	protein-coding	Slc17a5	10595189	0.418067	0.0538095	24	15	0.123701	294.342	302.764	332.345	326.903	330.686	367.182
240354	chr18-90	chr18	65431080	65431350	+	19	0.643	exon (NM_172833, exon 1 of 16)	exon (NM_172833, exon 1 of 16)	218	NM_172833	Mm.132613	NM_172833	ENSMUSG00000032688	Malt1	A630046N12|D430033E09Rik|Pcasp1	MALT1 paracaspase	protein-coding	Malt1	10456296	0.146865	0.00939007	24	5.5	0.206044	78.4619	109.132	101.971	93.422	81.8505	83.3459
15495	chr3-621	chr3	98428075	98428345	+	10.9	0.643	exon (NM_172863, exon 3 of 3)	exon (NM_172863, exon 3 of 3)	28821	NM_001111336	Mm.14309	NM_008294	ENSMUSG00000095143	Hsd3b4	-	hydroxy-delta-5-steroid dehydrogenase, 3 beta- and steroid delta-isomerase 4	protein-coding	Hsd3b4	10500539	0.167635	0.011578	12	7.5	0.142768	6.07065	6.38026	6.21594	6.16686	6.18274	6.34258
15495	chr3-621	chr3	98428075	98428345	+	10.9	0.643	exon (NM_172863, exon 3 of 3)	exon (NM_172863, exon 3 of 3)	28821	NM_001111336	Mm.14309	NM_008294	ENSMUSG00000095143	Hsd3b4	-	hydroxy-delta-5-steroid dehydrogenase, 3 beta- and steroid delta-isomerase 4	protein-coding	Hsd3b4	10500534	0.167635	0.011578	12	7.5	0.142768	6.07065	6.38026	6.21594	6.16686	6.18274	6.34258
268566	chr12-139	chr12	78226694	78226964	+	18.2	0.698	exon (NM_172952, exon 1 of 24)	exon (NM_172952, exon 1 of 24)	174	NM_145965	Mm.341742	NM_145965	ENSMUSG00000047454	Gphn	5730552E08Rik|AI662856|BC027112|C230040D23|GPH|GPHRYN|geph	gephyrin	protein-coding	Gphn	10396740	1	1	20	12.8333	0.0221772	747.091	718.324	727.826	746.873	744.997	777.84
80292	chr6-209	chr6	90369996	90370266	+	17.5	0.69	exon (NM_173002, exon 1 of 10)	exon (NM_173002, exon 1 of 10)	637	NM_173002	Mm.100116	NM_030260	ENSMUSG00000034430	Zxdc	A930012H20|B930086F11Rik|BC003332	ZXD family zinc finger C	protein-coding	Zxdc	10540012	1	0.31062	24	16	0.0579898	8.04064	7.98892	8.19073	8.12265	8.0402	8.11709
270802	chr10-133	chr10	121739984	121740254	+	19.7	0.593	exon (NM_173022, exon 1 of 3)	exon (NM_173022, exon 1 of 3)	182	NM_173022	Mm.209172	NM_173022	ENSMUSG00000053684	BC048403	E030027L10	cDNA sequence BC048403	protein-coding	BC048403	10366698	1	1	20	6.5	0.0225339	62.6703	53.4471	55.5498	67.1907	55.8421	50.4699
210530	chr16-337	chr16	26105247	26105517	+	12.4	0.605	exon (NM_173379, exon 1 of 15)	exon (NM_173379, exon 1 of 15)	402	NM_173379	Mm.326869	NM_173379	ENSMUSG00000038168	P3h2	4832416N06|AW553532|Leprel1|Mlat4	prolyl 3-hydroxylase 2	protein-coding	Leprel1	10438753	0.723213	0.146835	24	13	0.385175	6.86758	7.38666	7.93138	8.06028	7.56384	7.83663
219149	chr14-568	chr14	63606820	63607090	+	10.9	0.643	exon (NM_173393, exon 1 of 3)	exon (NM_173393, exon 1 of 3)	425	NM_173393	Mm.32071	NM_173393	ENSMUSG00000035067	Xkr6	2700008G24Rik|BC024502|Xrg6	X-linked Kx blood group related 6	protein-coding	Xkr6	10415866	0.922182	0.232281	24	20	0.123744	46.1491	42.5389	39.9615	39.8249	42.973	46.4536
239652	chr15-39	chr15	98288695	98288965	+	27	0.738	exon (NM_173769, exon 6 of 6)	exon (NM_173769, exon 6 of 6)	7253	NM_173769	Mm.207453	NM_173769	ENSMUSG00000022987	Zfp641	9930016F01Rik|Znf641	zinc finger protein 641	protein-coding	Zfp641	10432139	1	0.886572	12	1	0.0959049	162.636	125.418	155.059	151.191	153.172	156.654
68281	chr10-791	chr10	100588944	100589214	+	8.75	0.75	exon (NM_175128, exon 1 of 7)	exon (NM_175128, exon 1 of 7)	180	NM_175128	Mm.268474	NM_175128	ENSMUSG00000046567	4930430F08Rik	4930571E09Rik|A730088G13Rik|AW551239|C430008C19Rik	RIKEN cDNA 4930430F08 gene	protein-coding	4930430F08Rik	10372130	1	0.410551	12	0	0.125462	340.252	314.22	335.884	364.969	331.517	342.348
69155	chrX-67	chrX	12673335	12673605	+	11.7	0.81	exon (NM_175141, exon 1 of 7)	exon (NM_175141, exon 1 of 7)	169	NM_175141	Mm.15974	NM_175141	ENSMUSG00000044148	1810030O07Rik	-	RIKEN cDNA 1810030O07 gene	protein-coding	1810030O07Rik	10603651	0.146865	0.00939007	12	1	0	185.714	192.147	190.533	205.841	178.968	173.029
69499	chrX-140	chrX	151096109	151096379	+	8.02	0.667	exon (NM_175146, exon 2 of 5)	exon (NM_175146, exon 2 of 5)	299	NM_001164578	Mm.8142	NM_175146	ENSMUSG00000025264	Tsr2	2310007F12Rik	TSR2 20S rRNA accumulation	protein-coding	Tsr2	10607317	1	0.693388	24	14	0.187228	7.25734	7.36496	7.55563	7.63417	7.52212	7.4375
69672	chr13-239	chr13	55714671	55714941	+	13.1	0.588	exon (NM_175150, exon 1 of 5)	exon (NM_175150, exon 1 of 5)	156	NM_175150	Mm.294457	NM_175150	ENSMUSG00000021497	Txndc15	2310047H23Rik|AI854086|C5orf14|UNQ335	thioredoxin domain containing 15	protein-coding	Txndc15	10405539	0.34014	0.0374712	12	1	0.0554655	243.882	213.799	207.188	223.161	208.76	221.601
103806	chr11-423	chr11	50291897	50292167	+	17.5	0.778	exon (NM_175334, exon 1 of 5)	exon (NM_175334, exon 1 of 5)	304	NM_175334	Mm.51116	NM_175334	ENSMUSG00000050567	Maml1	AI644666|AW743257|D930008C07Rik|Mam-1|Mam1|mKIAA0200	mastermind like 1 (Drosophila)	protein-coding	Maml1	10385591	1	1	20	11.5	0	99.9331	90.2009	95.1116	86.7992	93.2964	95.9819
109075	chr15-80	chr15	76327390	76327660	+	21.9	0.655	exon (NM_175399, exon 1 of 3)	exon (NM_175399, exon 1 of 3)	128	NM_175399	Mm.322752	NM_175399	ENSMUSG00000034259	Exosc4	1110039I09Rik|1500001N04Rik|Rrp41	exosome component 4	protein-coding	Exosc4	10424804	0.723213	0.146835	24	13.5	0.0913653	91.4322	93.7242	102.303	113.094	95.0497	97.2482
109275	chr2-629	chr2	158625101	158625371	+	14.6	0.533	exon (NM_175419, exon 1 of 9)	exon (NM_175419, exon 1 of 9)	323	NM_175419	Mm.27747	NM_175419	ENSMUSG00000037761	Actr5	AA545173|B430109J19Rik	ARP5 actin-related protein 5	protein-coding	Actr5	10478133	1	1	20	6.83333	0.00428428	45.7367	38.6946	42.731	45.1511	43.3149	38.2461
212167	chr5-1367	chr5	21186306	21186576	+	8.75	0.654	exon (NM_175437, exon 1 of 31)	exon (NM_175437, exon 1 of 31)	174	NM_175437	Mm.121705	NM_175437	ENSMUSG00000039934	Gsap	A530088I07Rik|Pion	gamma-secretase activating protein	protein-coding	Pion	10519951	0.0690653	0.002767	24	5	0.102375	5.74008	6.0566	6.00563	5.78835	5.67718	5.80984
242474	chr4-313	chr4	56946910	56947180	+	19	0.654	exon (NM_175518, exon 1 of 18)	exon (NM_175518, exon 1 of 18)	384	NM_175518	Mm.296632	NM_175518	ENSMUSG00000055296	Tmem245	A630051L19Rik|AI957324|D730040F13Rik	transmembrane protein 245	protein-coding	Tmem245	10513082	1	0.886572	18	6	0.0877413	254.628	268.387	281.357	284.655	273.664	240.516
72515	chr17-424	chr17	71616322	71616592	+	14.6	0.595	exon (NM_175639, exon 1 of 18)	exon (NM_175639, exon 1 of 18)	242	NM_175639	Mm.257762	NM_175639	ENSMUSG00000041057	Wdr43	2610318G08Rik|AU020887|AV024208|Wrd43|mKIAA0007	WD repeat domain 43	protein-coding	Wdr43	10446693	0.994691	0.269008	12	2	0.0729946	372.963	359.643	347.209	396.429	429.734	397.624
319158	chr13-210	chr13	22041029	22041299	+	13.9	0.606	exon (NM_175656, exon 1 of 1)	exon (NM_175656, exon 1 of 1)	198	NM_175656	Mm.14775	NM_175656	ENSMUSG00000060639	Hist1h4i	-	histone cluster 1, H4i	protein-coding	Hist1h4i	10408113	1	1	20	12.8333	0.00709228	119.443	109.081	103.325	112.628	122.34	119.717
319172	chr13-616	chr13	23751220	23751490	+	10.2	0.682	exon (NM_175660, exon 1 of 1)	exon (NM_175660, exon 1 of 1)	267	NM_175660	Mm.423402	NM_175660	ENSMUSG00000061615	Hist1h2ab	H2A.1|H2a-53	histone cluster 1, H2ab	protein-coding	Hist1h2ab	10404063	0.377948	0.044983	12	6	0.0816638	15.1158	17.8345	16.7816	15.7443	18.625	16.4721
207165	chr11-771	chr11	107131189	107131459	+	14.6	0.71	exon (NM_176850, exon 1 of 28)	exon (NM_176850, exon 1 of 28)	598	NM_176850	Mm.343986	NM_176850	ENSMUSG00000040481	Bptf	9430093H17Rik|Falz	bromodomain PHD finger transcription factor	protein-coding	Bptf	10392300	0.242857	0.0211898	24	5	0.0749462	309.582	327.198	333.527	322.324	277.53	311.518
319625	chr17-683	chr17	80127755	80128025	+	10.9	0.704	exon (NM_176963, exon 1 of 7)	exon (NM_176963, exon 1 of 7)	419	NM_176963	Mm.29098	NM_176963	ENSMUSG00000035473	Galm	A530057M15Rik|AU015645|AU020959	galactose mutarotase	protein-coding	Galm	10447084	0.505682	0.0762022	24	4	0.0747129	76.3465	81.7882	63.7039	76.4	74.865	72.2823
319638	chr10-486	chr10	34418263	34418533	+	13.1	0.667	exon (NM_176968, exon 1 of 12)	exon (NM_176968, exon 1 of 12)	153	NM_176968	Mm.73467	NM_176968	ENSMUSG00000039480	Nt5dc1	6030401B09Rik|AW987726|Nt5c2l1	5'-nucleotidase domain containing 1	protein-coding	Nt5dc1	10368654	1	0.536501	24	18	0.055918	149.376	160.398	163.935	169.475	178.496	177.052
75914	chr6-177	chr6	85069215	85069485	+	18.2	0.615	exon (NM_177077, exon 1 of 22)	exon (NM_177077, exon 1 of 22)	163	NM_177077	Mm.159621	NM_177077	ENSMUSG00000033769	Exoc6b	4930569O18Rik|G430127E12Rik|Sec15b|Sec15l2|mKIAA0919	exocyst complex component 6B	protein-coding	Exoc6b	10545780	0.852649	0.199965	24	7	0.0504026	401.342	457.497	453.629	455.513	419.649	425.844
320184	chr16-41	chr16	37868605	37868875	+	24.1	0.618	exon (NM_177093, exon 1 of 4)	exon (NM_177093, exon 1 of 4)	340	NM_177093	Mm.390882	NM_177093	ENSMUSG00000034158	Lrrc58	1810012N18Rik|C330018J07Rik	leucine rich repeat containing 58	protein-coding	Lrrc58	10435654	0.922182	0.232281	12	2	0.123991	928.752	947.748	839.281	871.067	866.989	888.791
320609	chr6-222	chr6	29917086	29917356	+	16.8	0.75	exon (NM_177204, exon 1 of 21)	exon (NM_177204, exon 1 of 21)	208	NR_104576	Mm.56097	NM_177204	ENSMUSG00000039629	Strip2	D330017J20Rik|Fam40b	striatin interacting protein 2	protein-coding	Fam40b	10536949	1	1	20	6.83333	0.0282654	4.99433	5.34911	5.14591	5.23606	5.23946	5.17542
226182	chr19-277	chr19	47068071	47068341	+	14.6	0.781	exon (NM_177342, exon 1 of 11)	exon (NM_177342, exon 1 of 11)	458	NM_177342	Mm.301522	NM_177342	ENSMUSG00000025049	Taf5	6330528C20Rik|AV117817	TATA-box binding protein associated factor 5	protein-coding	Taf5	10463739	1	1	20	7.16667	0.0108777	6.0584	6.16173	6.07185	6.18431	6.0819	6.25538
66422	chr7-56	chr7	127254262	127254532	+	25.5	0.597	exon (NM_177362, exon 3 of 3)	exon (NM_177362, exon 3 of 3)	6270	NM_023203	Mm.29898	NM_023203	ENSMUSG00000042462	Dctpp1	2410015N17Rik|AI854235|RS21-C6	dCTP pyrophosphatase 1	protein-coding	Dctpp1	10568217	0.66424	0.125235	24	15	0.0693813	200.295	194.315	196.907	222.642	209.759	206.404
338337	chr14-229	chr14	75754168	75754438	+	13.9	0.717	exon (NM_177381, exon 1 of 23)	exon (NM_177381, exon 1 of 23)	190	NM_177381	Mm.86507	NM_177381	ENSMUSG00000034893	Cog3	E430004N23	component of oligomeric golgi complex 3	protein-coding	Cog3	10421624	0.505682	0.0762022	24	10	0.100268	154.69	167.527	162.135	183.872	162.961	151.471
338349	chr4-1248	chr4	84884666	84884936	+	9.48	0.636	exon (NM_177385, exon 1 of 5)	exon (NM_177385, exon 1 of 5)	492	NM_177385	Mm.440562	NM_175275	ENSMUSG00000038070	Cntln	AI448092|B430108F07Rik|D530005L17Rik	centlein, centrosomal protein	protein-coding	Cntln	10505674	1	1	20	6.5	0.0253875	5.43618	5.68422	5.62999	5.60238	5.5673	5.50089
224019	chr16-338	chr16	17276292	17276562	+	13.1	0.595	exon (NM_177473, exon 1 of 10)	exon (NM_177473, exon 1 of 10)	127	NM_177473	Mm.246388	NM_177473	ENSMUSG00000055692	Tmem191c	4933405M22Rik|D16Bwg1494e|MNCb-4137	transmembrane protein 191C	protein-coding	Tmem191c	10433977	1	0.410551	12	8	0.0995182	251.25	206.798	230.037	213.33	224.576	219.72
229445	chr3-882	chr3	81932591	81932861	+	9.48	0.833	exon (NM_177662, exon 1 of 8)	exon (NM_177662, exon 1 of 8)	125	NM_177662	Mm.254642	NM_177662	ENSMUSG00000028015	Ctso	A330105D01Rik|AI118514	cathepsin O	protein-coding	Ctso	10492699	0.460888	0.0641441	24	6	0.0750382	169.582	246.636	203.416	210.896	222.762	178.689
231874	chr5-822	chr5	144014614	144014884	+	10.9	0.778	exon (NM_177682, exon 1 of 15)	exon (NM_177682, exon 1 of 15)	104	NM_177682	Mm.320432	NM_177682	ENSMUSG00000029617	Ccz1	AU022870	CCZ1 vacuolar protein trafficking and biogenesis associated	protein-coding	Ccz1	10535508	0.271867	0.0257197	12	2	0.063477	357.084	350.034	335.542	346.149	341.599	320.16
214669	chr15-614	chr15	81649995	81650265	+	10.2	0.615	exon (NM_177821, exon 31 of 31)	exon (NM_177821, exon 31 of 31)	-13759	NR_110362	Mm.280768	NM_145993	ENSMUSG00000022394	L3mbtl2	4732493N06Rik|M4mbt	l(3)mbt-like 2 (Drosophila)	protein-coding	L3mbtl2	10425559	0.994691	0.269008	12	0	0.07781	6.7898	6.75053	6.73693	6.96139	6.71426	6.87065
319155	chr13-141	chr13	23698170	23698440	+	16.8	0.692	exon (NM_178208, exon 1 of 1)	exon (NM_178208, exon 1 of 1)	153	NM_178208	Mm.261662	NM_178208	ENSMUSG00000060678	Hist1h4c	-	histone cluster 1, H4c	protein-coding	Hist1h4c	10408225	1	1	20	12.5	0.00863534	84.231	109.056	89.2586	81.3291	82.2401	112.42
353155	chr11-954	chr11	98982563	98982833	+	11.7	0.708	exon (NM_178596, exon 1 of 1)	exon (NM_178596, exon 1 of 1)	318	NM_178596	Mm.453253	NM_178596	ENSMUSG00000047197	Gjd3	Gja11|Gjc1|cx30.2	gap junction protein, delta 3	protein-coding	Gjd3	10390705	1	1	20	11.8333	0.0194478	192.215	159.131	167.076	175.506	183.147	168.331
68799	chr17-23	chr17	15807305	15807575	+	37.2	0.753	exon (NM_178615, exon 3 of 3)	exon (NM_178615, exon 3 of 3)	19146	NM_178615	Mm.293466	NM_178615	ENSMUSG00000048027	Rgmb	1110059F19Rik|DRAGON	repulsive guidance molecule family member B	protein-coding	Rgmb	10448081	0.852649	0.199965	12	0	0.0110521	607.87	581.377	629.695	625.666	600.071	555.988
109108	chr5-305	chr5	67307054	67307324	+	16	0.574	exon (NM_178651, exon 1 of 18)	exon (NM_178651, exon 1 of 18)	234	NM_178651	Mm.234455	NM_178651	ENSMUSG00000029221	Slc30a9	2310024J23Rik|AL024256|GAC63|HUEL|znT-9	solute carrier family 30 (zinc transporter), member 9	protein-coding	Slc30a9	10522265	0.994691	0.269008	12	1	0.118306	709.471	663.025	707.781	755.637	707.217	687.149
73442	chr19-132	chr19	58943426	58943696	+	17.5	0.583	exon (NM_178689, exon 1 of 14)	exon (NM_178689, exon 1 of 14)	111	NM_001327998	Mm.39739	NM_175199	ENSMUSG00000025092	Hspa12a	1700063D12Rik|AI118035|AI840429|AW048913|AW556406|D5Mgi40|Gm19925|mKIAA0417	heat shock protein 12A	protein-coding	Hspa12a	10468746	1	1	20	6.5	0.0518608	6.54435	6.75458	6.80284	6.81872	6.64162	6.81446
230991	chr4-307	chr4	155694609	155694879	+	16	0.619	exon (NM_178699, exon 1 of 1)	exon (NM_178699, exon 1 of 1)	402	NM_178699	Mm.29083	NM_178699	ENSMUSG00000074738	Fndc10	B930041F14Rik|MNCb-3966	fibronectin type III domain containing 10	protein-coding	B930041F14Rik	10511136	1	0.693388	12	9	0	6.10145	6.03335	6.16251	6.19231	6.23847	6.29157
235344	chr9-189	chr9	51008655	51008925	+	16.8	0.578	exon (NM_178710, exon 1 of 16)	exon (NM_178710, exon 1 of 16)	283	NM_178710	Mm.104932	NM_178710	ENSMUSG00000037112	Sik2	G630080D20Rik|Snf1lk2	salt inducible kinase 2	protein-coding	Sik2	10593430	0.0183135	0.00040883	24	6	0.0782484	362.948	515.45	387.263	427.073	377.481	361.723
238799	chr13-235	chr13	98890593	98890863	+	15.3	0.625	exon (NM_178716, exon 2 of 24)	exon (NM_178716, exon 2 of 24)	314	NM_001048267	Mm.173286	NM_178716	ENSMUSG00000009470	Tnpo1	AU021749|D13Ertd688e|IPO2|Kpnb2|MIP|MIP1|TRN	transportin 1	protein-coding	Tnpo1	10411491	0.852649	0.199965	12	0	0.120208	9.27796	9.25603	9.22665	9.3389	9.15092	9.29151
320924	chr18-291	chr18	66291538	66291808	+	12.4	0.72	exon (NM_178793, exon 1 of 11)	exon (NM_178793, exon 1 of 11)	165	NM_178793	Mm.442049	NM_178793	ENSMUSG00000046318	Ccbe1	4933426F18Rik|9430093N24Rik|mKIAA1983	collagen and calcium binding EGF domains 1	protein-coding	Ccbe1	10459496	0.00543649	7.11e-05	24	17	0.151399	115.546	104.816	96.0537	121.988	134.154	102.706
99890	chr3-77	chr3	110250512	110250782	+	21.1	0.597	exon (NM_178891, exon 1 of 1)	exon (NM_178891, exon 1 of 1)	352	NR_024139	Mm.36115	NM_178891	ENSMUSG00000049300	Prmt6	AW124876|BB233495|Hrmt1l6	protein arginine N-methyltransferase 6	protein-coding	Prmt6	10501485	1	1	20	10.1667	0	6.18602	6.28444	6.27093	6.17863	6.16271	6.26327
224019	chr16-36	chr16	17257609	17257879	+	23.3	0.667	exon (NM_178922, exon 3 of 3)	exon (NM_178922, exon 3 of 3)	-18556	NM_177473	Mm.246388	NM_177473	ENSMUSG00000055692	Tmem191c	4933405M22Rik|D16Bwg1494e|MNCb-4137	transmembrane protein 191C	protein-coding	Tmem191c	10433977	1	0.410551	12	8	0.0995182	251.25	206.798	230.037	213.33	224.576	219.72
100201	chr4-233	chr4	15266186	15266456	+	19	0.533	exon (NM_181401, exon 1 of 3)	exon (NM_181401, exon 1 of 3)	501	NM_181401	Mm.394111	NM_181401	ENSMUSG00000043252	Tmem64	9630015D15Rik|AI790744|AV300874	transmembrane protein 64	protein-coding	Tmem64	10503410	0.922182	0.232281	12	0	0.0931967	1421.11	1297.03	1352.86	1438.65	1435.26	1451.87
240239	chr18-431	chr18	42579005	42579275	+	10.9	0.731	exon (NM_181543, exon 1 of 1)	exon (NM_181543, exon 1 of 1)	512	NM_181543	Mm.186779	NM_181543	ENSMUSG00000042816	Gpr151	C130082O03Rik|GalRL|PGR7|nGPCR-2037	G protein-coupled receptor 151	protein-coding	Gpr151	10458641	1	0.31062	24	1	0.0153089	26.3164	25.4565	25.5822	25.0773	24.9668	24.2511
238252	chr12-454	chr12	72070355	72070625	+	9.48	0.562	exon (NM_181752, exon 1 of 1)	exon (NM_181752, exon 1 of 1)	501	NM_181752	Mm.390508	NM_181752	ENSMUSG00000043398	Gpr135	PAFR	G protein-coupled receptor 135	protein-coding	Gpr135	10400894	1	1	20	10.8333	0.0102507	90.0216	85.1314	79.6775	86.3845	83.9012	87.323
72749	chr15-47	chr15	76639617	76639887	+	24.1	0.712	exon (NM_183091, exon 2 of 26)	exon (NM_183091, exon 2 of 26)	177	NM_183091	Mm.358749	NM_183091	ENSMUSG00000059323	Tonsl	2810439M11Rik|Nfkbil2	tonsoku-like, DNA repair protein	protein-coding	Tonsl	10430032	1	0.440264	12	7	0.0285883	24.5484	22.2452	24.7154	23.2114	22.2452	23.4953
213753	chr17-111	chr17	24669786	24670056	+	21.1	0.582	exon (NM_183149, exon 1 of 12)	exon (NM_183149, exon 1 of 12)	169	NM_183149	Mm.219581	NM_183149	ENSMUSG00000041130	Zfp598	BC023040|Ntrap|Znf598	zinc finger protein 598	protein-coding	Zfp598	10442549	1	1	20	12.5	0.0298352	111.951	107.869	109.328	122.916	109.686	111.76
330260	chr6-946	chr6	5298124	5298394	+	9.48	0.652	exon (NM_183308, exon 1 of 9)	exon (NM_183308, exon 1 of 9)	114	NM_183308	Mm.126984	NM_183308	ENSMUSG00000032667	Pon2	6330405I24Rik|AI481612	paraoxonase 2	protein-coding	Pon2	10543004	1	0.785093	12	1	0.128609	322.705	306.993	316.702	312.521	321.361	298.308
329015	chr19-98	chr19	6241817	6242087	+	19	0.686	exon (NM_194348, exon 1 of 40)	exon (NM_194348, exon 1 of 40)	284	NM_194348	Mm.277384	NM_194348	ENSMUSG00000024773	Atg2a	1810013C15Rik|A830054M12|BC023754|mKIAA0404	autophagy related 2A	protein-coding	Atg2a	10460787	0.66424	0.125235	12	11	0.0413445	163.732	151.792	143.42	151.045	155.766	160.041
378435	chr15-21	chr15	75746905	75747175	+	35.7	0.8	exon (NM_194350, exon 1 of 1)	exon (NM_194350, exon 1 of 1)	882	NM_194350	Mm.309589	NM_194350	ENSMUSG00000047591	Mafa	RIPE3b1	v-maf musculoaponeurotic fibrosarcoma oncogene family, protein A (avian)	protein-coding	Mafa	10429621	1	0.469977	12	10	0.211375	290.407	239.483	286.555	271.248	226.522	294.806
69109	chr11-1492	chr11	78751282	78751552	+	10.2	0.789	exon (NM_197989, exon 1 of 1)	exon (NM_197989, exon 1 of 1)	312	NM_197989	Mm.341420	NM_197989	ENSMUSG00000049489	Fam58b	1810009O10Rik|Fam58a	family with sequence similarity 58, member B	protein-coding	Fam58b	10388898	0.852649	0.199965	24	14.5	0.161772	48.3063	40.507	47.1632	54.5074	56.9167	52.6704
73737	chr2-129	chr2	32381597	32381867	+	21.9	0.594	exon (NM_198001, exon 1 of 2)	exon (NM_198001, exon 1 of 2)	183	NM_198001	Mm.27608	NM_198001	ENSMUSG00000039195	1110008P14Rik	C79326	RIKEN cDNA 1110008P14 gene	protein-coding	1110008P14Rik	10481621	1	1	20	7.16667	0.00911775	123.331	127.629	112.853	133.137	111.837	137.087
207375	chrX-77	chrX	151344246	151344516	+	8.75	0.529	exon (NM_198105, exon 1 of 16)	exon (NM_198105, exon 1 of 16)	158	NM_198105	Mm.391339	NM_198105	ENSMUSG00000025262	Fam120c	D930001I21Rik|ORF34	family with sequence similarity 120, member C	protein-coding	Fam120c	10602454	0.111763	0.00609984	24	11.5	0.0655276	192.869	199.609	212.851	226.068	209.685	205.274
67988	chr18-88	chr18	90510194	90510464	+	19.7	0.636	exon (NM_198295, exon 1 of 16)	exon (NM_198295, exon 1 of 16)	175	NM_198295	Mm.268041	NM_198295	ENSMUSG00000024614	Tmx3	6430411B10Rik|A730024F05Rik|AV259382|Txndc10|mKIAA1830	thioredoxin-related transmembrane protein 3	protein-coding	Tmx3	10457183	0.377948	0.044983	12	2	0.0341462	291.829	316.072	305.668	349.19	326.847	288.921
211134	chr8-265	chr8	69135557	69135827	+	16.8	0.75	exon (NM_199364, exon 3 of 3)	exon (NM_199364, exon 3 of 3)	5261	NM_199364	Mm.409446	NM_199364	ENSMUSG00000036306	Lzts1	F37|FEZ1|PSD-Zip70	leucine zipper, putative tumor suppressor 1	protein-coding	Lzts1	10579043	1	1	20	14.1667	0.0117262	92.3206	86.0146	83.0582	86.2427	89.4444	81.8812
107094	chr19-276	chr19	41895842	41896112	+	13.9	0.583	exon (NM_199447, exon 1 of 34)	exon (NM_199447, exon 1 of 34)	176	NM_199447	Mm.276044	NM_199447	ENSMUSG00000035049	Rrp12	AA408556|AA536972|mKIAA0690	ribosomal RNA processing 12 homolog (S. cerevisiae)	protein-coding	Rrp12	10467653	1	1	20	12.1667	0.0078261	280.534	252.019	250.892	272.488	257.079	276.746
225020	chr17-465	chr17	78417896	78418166	+	13.1	0.568	exon (NM_199448, exon 1 of 8)	exon (NM_199448, exon 1 of 8)	121	NM_199448	Mm.236835	NM_199448	ENSMUSG00000056121	Fez2	9030616F16|D17Ertd315e	fasciculation and elongation protein zeta 2 (zygin II)	protein-coding	Fez2	10452907	0.190788	0.0142182	12	0	0.0411253	371.632	359.653	363.243	393.776	362.111	377.463
382073	chr9-478	chr9	44417754	44418024	+	14.6	0.561	exon (NM_201372, exon 1 of 11)	exon (NM_201372, exon 1 of 11)	118	NM_201372	Mm.259573	NM_201372	ENSMUSG00000043923	Ccdc84	D630044F24Rik|Gm1114	coiled-coil domain containing 84	protein-coding	Ccdc84	10592856	1	0.785093	24	7	6.28e-16	92.5185	90.8648	98.7412	92.6372	86.8173	88.7349
381101	chr17-625	chr17	46496772	46497042	+	12.4	0.731	exon (NM_207161, exon 1 of 4)	exon (NM_207161, exon 1 of 4)	118	NM_207161	Mm.35801	NM_207161	ENSMUSG00000040658	Dnph1	C76683|Rcl	2'-deoxynucleoside 5'-phosphate N-hydrolase 1	protein-coding	BC048355	10445558	1	1	20	12.5	0.0470242	148.827	124.034	154.49	137.762	159.21	154.089
56515	chr18-89	chr18	21001926	21002196	+	17.5	0.789	exon (NM_207623, exon 1 of 7)	exon (NM_207623, exon 1 of 7)	104	NM_207623	Mm.253542	NM_019706	ENSMUSG00000024317	Rnf138	2410015A17Rik|2810480D20Rik|STRIN|Trif|Trif-d	ring finger protein 138	protein-coding	Rnf138	10454202	0.460888	0.0641441	24	10	0.11366	5.33581	5.53859	5.4257	5.42448	5.31049	5.33108
69635	chr13-355	chr13	60455227	60455497	+	13.1	0.667	Intergenic	Intergenic	-146585	NM_001285917	Mm.24103	NM_029653	ENSMUSG00000021559	Dapk1	D13Ucla1|DAP-Kinase	death associated protein kinase 1	protein-coding	Dapk1	10405693	2.18e-06	9.83e-10	24	6	0.297749	7.48395	8.05535	7.61446	7.49092	7.25109	7.28627
78889	chr11-575	chr11	79224689	79224959	+	16	0.591	Intergenic	Intergenic	18200	NM_001042565	Mm.307022	NM_019653	ENSMUSG00000017677	Wsb1	1110056B13Rik|2700038M07Rik	WD repeat and SOCS box-containing 1	protein-coding	Wsb1	10388938	4.68e-06	3.16e-09	24	5	0.412611	7.9067	8.35731	8.16262	7.63853	7.19456	7.54919
65256	chr12-10	chr12	103359460	103359730	+	51.8	0.76	Intergenic	Intergenic	-3594	NM_023049	Mm.27159	NM_023049	ENSMUSG00000021200	Asb2	1110008E15Rik	ankyrin repeat and SOCS box-containing 2	protein-coding	Asb2	10402325	1.46e-05	1.6e-08	24	4	0.263609	3243.42	3469.23	3124.48	2652.8	2118.31	2504.84
18712	chr17-15	chr17	29455526	29455796	+	45.2	0.8	Intergenic	Intergenic	-35384	NM_008842	Mm.405293	NM_008842	ENSMUSG00000024014	Pim1	Pim-1	proviral integration site 1	protein-coding	Pim1	10443527	2.1e-05	2.67e-08	24	4.5	0.618584	368.311	356.063	309.407	214.229	183.93	194.17
268903	chr16-175	chr16	76433188	76433458	+	13.9	0.735	Intergenic	Intergenic	-60274	NM_173440	Mm.74711	NM_173440	ENSMUSG00000048490	Nrip1	6030458L20Rik|8430438I05Rik|9630050P12|AA959574|AW456757|RIP140	nuclear receptor interacting protein 1	protein-coding	Nrip1	10440406	5.83e-05	1.13e-07	24	19	0.413452	469.636	346.978	332.714	386.33	504.759	541.418
268903	chr16-315	chr16	76618300	76618570	+	12.4	0.783	Intergenic	Intergenic	-245386	NM_173440	Mm.74711	NM_173440	ENSMUSG00000048490	Nrip1	6030458L20Rik|8430438I05Rik|9630050P12|AA959574|AW456757|RIP140	nuclear receptor interacting protein 1	protein-coding	Nrip1	10440406	5.83e-05	1.13e-07	24	19	0.413452	469.636	346.978	332.714	386.33	504.759	541.418
268903	chr16-705	chr16	76403481	76403751	+	8.75	0.75	Intergenic	Intergenic	-30567	NM_173440	Mm.74711	NM_173440	ENSMUSG00000048490	Nrip1	6030458L20Rik|8430438I05Rik|9630050P12|AA959574|AW456757|RIP140	nuclear receptor interacting protein 1	protein-coding	Nrip1	10440406	5.83e-05	1.13e-07	24	19	0.413452	469.636	346.978	332.714	386.33	504.759	541.418
26427	chr2-44	chr2	92093606	92093876	+	34.3	0.884	Intergenic	(CCCTAA)n|Simple_repeat|Simple_repeat	-69571	NM_011957	Mm.10353	NM_011957	ENSMUSG00000027230	Creb3l1	Oasis	cAMP responsive element binding protein 3-like 1	protein-coding	Creb3l1	10485117	7.93e-05	1.79e-07	24	8	0.502322	109.674	160.357	154.085	153.051	97.8642	81.8301
270110	chr8-37	chr8	126595425	126595695	+	38.6	0.779	Intergenic	Intergenic	-2124	NM_001164598	Mm.334918	NM_001164598	ENSMUSG00000051495	Irf2bp2	E130305N23Rik|IRF-2BP2	interferon regulatory factor 2 binding protein 2	protein-coding	Irf2bp2	10582811	0.00019975	6.59e-07	24	4	0.153265	376.282	436.507	363.951	310.186	275.984	302.007
240131	chr17-35	chr17	67629203	67629473	+	30.6	0.875	Intergenic	Intergenic	3385	NM_001033340	Mm.295736	NM_001033340	ENSMUSG00000073375	Lrrc30	Gm326	leucine rich repeat containing 30	protein-coding	Lrrc30	10452609	0.00019975	6.59e-07	24	2	0.275581	1284.77	1279.27	1169.03	728.482	851.481	1167.82
21685	chr15-12	chr15	81831528	81831798	+	38.6	0.667	Intergenic	Intergenic	20249	NM_017376	Mm.270278	NM_017376	ENSMUSG00000022389	Tef	2310028D20Rik	thyrotroph embryonic factor	protein-coding	Tef	10425601	0.000268293	9.96e-07	24	16.5	0.175978	564.042	458.482	510.572	539.856	633.324	593.49
16716	chr9-64	chr9	102494559	102494829	+	29.2	0.782	Intergenic	Intergenic	-11444	NM_024291	Mm.101692	NM_024291	ENSMUSG00000035606	Ky	CD1|D9Mgc44e|ky	kyphoscoliosis peptidase	protein-coding	Ky	10588203	0.000268293	9.96e-07	24	14	0.318884	735.958	764.366	891.506	1069.48	1053.66	926.239
14645	chr1-794	chr1	153922448	153922718	+	12.4	0.731	Intergenic	Intergenic	22654	NM_008131	Mm.210745	NM_008131	ENSMUSG00000026473	Glul	GS|Glns	glutamate-ammonia ligase (glutamine synthetase)	protein-coding	Glul	10350753	0.000358582	1.49e-06	24	22	0.408496	2446.32	1922.14	1517.2	1566.69	2023.03	2372.35
67760	chr15-120	chr15	96709540	96709810	+	17.5	0.476	Intergenic	CpG	-9977	NM_175121	Mm.46754	NM_175121	ENSMUSG00000022462	Slc38a2	5033402L14Rik|AI316867|ATA2|SAT2|mKIAA1382	solute carrier family 38, member 2	protein-coding	Slc38a2	10431894	0.000475517	2.21e-06	24	1.5	0.334391	2823.17	2791.84	2327.56	1848.58	1879.46	2543.85
67760	chr15-339	chr15	96791043	96791313	+	12.4	0.759	Intergenic	Intergenic	-91480	NM_175121	Mm.46754	NM_175121	ENSMUSG00000022462	Slc38a2	5033402L14Rik|AI316867|ATA2|SAT2|mKIAA1382	solute carrier family 38, member 2	protein-coding	Slc38a2	10431894	0.000475517	2.21e-06	24	1.5	0.334391	2823.17	2791.84	2327.56	1848.58	1879.46	2543.85
319974	chr5-881	chr5	132648788	132649058	+	11.7	0.696	Intergenic	Intergenic	-106580	NM_177047	Mm.409595	NM_177047	ENSMUSG00000029673	Auts2	2700063G02Rik|A730011F23Rik|D830032G16Rik	autism susceptibility candidate 2	protein-coding	Auts2	10534168	0.000475517	2.21e-06	24	8	0.368289	163.446	213.436	227.328	199.685	139.173	119.523
319974	chr5-925	chr5	132758686	132758956	+	10.9	0.696	Intergenic	Intergenic	-216478	NM_177047	Mm.409595	NM_177047	ENSMUSG00000029673	Auts2	2700063G02Rik|A730011F23Rik|D830032G16Rik	autism susceptibility candidate 2	protein-coding	Auts2	10534168	0.000475517	2.21e-06	24	8	0.368289	163.446	213.436	227.328	199.685	139.173	119.523
18708	chr13-131	chr13	101994914	101995184	+	17.5	0.765	Intergenic	Intergenic	-226832	NM_001077495	Mm.259333	NM_001024955	ENSMUSG00000041417	Pik3r1	PI3K|p50alpha|p55alpha|p85alpha	phosphatidylinositol 3-kinase, regulatory subunit, polypeptide 1 (p85 alpha)	protein-coding	Pik3r1	10411782	0.000475517	2.21e-06	24	1	0.291908	9.65521	10.0004	9.32028	9.22576	9.39573	9.72398
18708	chr13-127	chr13	101811955	101812225	+	16.8	0.684	Intergenic	Intergenic	-43873	NM_001077495	Mm.259333	NM_001024955	ENSMUSG00000041417	Pik3r1	PI3K|p50alpha|p55alpha|p85alpha	phosphatidylinositol 3-kinase, regulatory subunit, polypeptide 1 (p85 alpha)	protein-coding	Pik3r1	10411782	0.000475517	2.21e-06	24	1	0.291908	9.65521	10.0004	9.32028	9.22576	9.39573	9.72398
18708	chr13-566	chr13	102014944	102015214	+	10.2	0.824	Intergenic	Intergenic	-246862	NM_001077495	Mm.259333	NM_001024955	ENSMUSG00000041417	Pik3r1	PI3K|p50alpha|p55alpha|p85alpha	phosphatidylinositol 3-kinase, regulatory subunit, polypeptide 1 (p85 alpha)	protein-coding	Pik3r1	10411782	0.000475517	2.21e-06	24	1	0.291908	9.65521	10.0004	9.32028	9.22576	9.39573	9.72398
18708	chr13-125	chr13	101848292	101848562	+	15.3	0.692	Intergenic	Intergenic	-80210	NM_001077495	Mm.259333	NM_001024955	ENSMUSG00000041417	Pik3r1	PI3K|p50alpha|p55alpha|p85alpha	phosphatidylinositol 3-kinase, regulatory subunit, polypeptide 1 (p85 alpha)	protein-coding	Pik3r1	10411782	0.000475517	2.21e-06	24	1	0.291908	9.65521	10.0004	9.32028	9.22576	9.39573	9.72398
16647	chr11-169	chr11	107012766	107013036	+	24.8	0.643	Intergenic	tRNA-Arg-AGG|tRNA|tRNA	-13376	NM_010655	Mm.12508	NM_010655	ENSMUSG00000018362	Kpna2	2410044B12Rik|IPOA1|PTAC58|Rch1	karyopherin (importin) alpha 2	protein-coding	Kpna2	10392284	0.000626016	3.24e-06	24	17	0.326648	301.159	280.25	267.334	342.035	411.886	386.017
53318	chr8-208	chr8	45877741	45878011	+	17.5	0.771	Intergenic	MLT1G3|LTR|ERVL-MaLR	-7609	NM_016798	Mm.282900	NM_016798	ENSMUSG00000031636	Pdlim3	AI463105|ALP|Actn2lp	PDZ and LIM domain 3	protein-coding	Pdlim3	10571601	0.00134283	9.73e-06	24	4	0.0271529	5141.59	5495.75	5402.46	5007.93	4711.92	5202.9
29815	chr3-887	chr3	122413828	122414098	+	8.75	0.789	Intergenic	(CCTG)n|Simple_repeat|Simple_repeat	-5817	NM_013867	Mm.45815	NM_013867	ENSMUSG00000028121	Bcar3	AI131758|AND-34	breast cancer anti-estrogen resistance 3	protein-coding	Bcar3	10495781	0.00172794	1.38e-05	24	6	0.0700743	6.26012	6.38199	6.35156	6.33164	6.10012	6.26611
22390	chr7-506	chr7	110164886	110165156	+	13.1	0.733	Intergenic	Intergenic	42962	NM_009516	Mm.287173	NM_009516	ENSMUSG00000031016	Wee1	Wee1A	WEE 1 homolog 1 (S. pombe)	protein-coding	Wee1	10556266	0.00220262	1.94e-05	24	19	0.397189	158.25	152.512	118.819	160.875	208.241	196.192
14369	chr1-360	chr1	59409596	59409866	+	16	0.765	Intergenic	Intergenic	-72416	NM_008057	Mm.297906	NM_008057	ENSMUSG00000041075	Fzd7	Fz7	frizzled class receptor 7	protein-coding	Fzd7	10346607	0.00276041	2.72e-05	24	13	0.267187	387.867	435.452	427.251	608.68	514.694	401.735
54343	chr6-143	chr6	136468506	136468776	+	20.4	0.698	Intergenic	Intergenic	-50210	NM_019426	Mm.173271	NM_019426	ENSMUSG00000030213	Atf7ip	2610204M12Rik|AM|Mcaf1	activating transcription factor 7 interacting protein	protein-coding	Atf7ip	10542378	0.0043622	5.2e-05	24	13	0.0498227	748.76	814.929	836.569	909.633	864.936	823.377
17127	chr9-1212	chr9	63832351	63832621	+	8.75	0.765	Intergenic	Intergenic	-74492	NM_016769	Mm.7320	NM_016769	ENSMUSG00000032402	Smad3	AU022421|Madh3	SMAD family member 3	protein-coding	Smad3	10594404	0.0043622	5.2e-05	24	5	0.171459	769.843	756.339	662.685	699.044	530.552	649.75
109676	chr3-173	chr3	127521202	127521472	+	17.5	0.929	Intergenic	Intergenic	-22222	NM_001327938	Mm.220242	NM_178655	ENSMUSG00000032826	Ank2	100043364|AI835472|AW491075|Ank-2|Gm4392	ankyrin 2, brain	protein-coding	Ank2	10501971	0.0043622	5.2e-05	24	14	0.118313	8.26202	8.23256	8.42934	8.7516	8.42418	8.30059
12827	chr8-65	chr8	11183828	11184098	+	27.7	0.764	Intergenic	Intergenic	-128842	NM_009932	Mm.181021	NM_009932	ENSMUSG00000031503	Col4a2	Col4a-2	collagen, type IV, alpha 2	protein-coding	Col4a2	10570068	0.00543649	7.11e-05	24	9	0.238083	194.676	220.122	234.236	238.405	176.833	185.48
14245	chr12-713	chr12	16271025	16271295	+	8.75	0.6	Intergenic	Intergenic	318610	NM_001130412	Mm.153625	NM_015763	ENSMUSG00000020593	Lpin1	4631420P06|Kiaa0188|Lipin1|fld|mKIAA0188	lipin 1	protein-coding	Lpin1	10399478	0.00543649	7.11e-05	24	6	0.0451134	11.1649	11.2166	11.1323	11.1659	10.9581	11.0102
17878	chr10-1032	chr10	107506442	107506712	+	8.75	0.684	Intergenic	Intergenic	-11848	NM_008657	Mm.11	NM_008657	ENSMUSG00000035923	Myf6	MRF4|bHLHc4|herculin	myogenic factor 6	protein-coding	Myf6	10372230	0.00673042	9.66e-05	24	0	0.198061	2723.22	2137.19	2115.52	1990.48	2160.43	2417
320790	chr4-384	chr4	8647298	8647568	+	12.4	0.7	Intergenic	CpG	-42973	NM_001277149	Mm.138792	NM_001033395	ENSMUSG00000041235	Chd7	A730019I05Rik|Cycn|Cyn|Dz|Edy|Flo|GENA 47|GENA 60|Gena 52|Lda|Mt|Obt|Todo|WBE1|Whi|metis	chromodomain helicase DNA binding protein 7	protein-coding	Chd7	10503218	0.00673042	9.66e-05	24	5	0.181528	8.34356	8.42502	8.47064	8.18429	8.02639	8.17945
320790	chr4-24	chr4	8939173	8939443	+	30.6	0.804	Intergenic	Intergenic	248902	NM_001277149	Mm.138792	NM_001033395	ENSMUSG00000041235	Chd7	A730019I05Rik|Cycn|Cyn|Dz|Edy|Flo|GENA 47|GENA 60|Gena 52|Lda|Mt|Obt|Todo|WBE1|Whi|metis	chromodomain helicase DNA binding protein 7	protein-coding	Chd7	10503218	0.00673042	9.66e-05	24	5	0.181528	8.34356	8.42502	8.47064	8.18429	8.02639	8.17945
320790	chr4-1073	chr4	8911542	8911812	+	11.7	0.63	Intergenic	CpG	221271	NM_001277149	Mm.138792	NM_001033395	ENSMUSG00000041235	Chd7	A730019I05Rik|Cycn|Cyn|Dz|Edy|Flo|GENA 47|GENA 60|Gena 52|Lda|Mt|Obt|Todo|WBE1|Whi|metis	chromodomain helicase DNA binding protein 7	protein-coding	Chd7	10503218	0.00673042	9.66e-05	24	5	0.181528	8.34356	8.42502	8.47064	8.18429	8.02639	8.17945
67213	chr9-320	chr9	114752946	114753216	+	16	0.703	Intergenic	CpG	21878	NM_026036	Mm.28858	NM_026036	ENSMUSG00000032434	Cmtm6	2810051A14Rik|AA536733|Cklfsf6	CKLF-like MARVEL transmembrane domain containing 6	protein-coding	Cmtm6	10589929	0.00831056	0.000130539	24	6	0.21373	216.575	284.365	256.905	229.204	208.585	177.419
320790	chr4-384	chr4	8647298	8647568	+	12.4	0.7	Intergenic	CpG	-42973	NM_001277149	Mm.138792	NM_001033395	ENSMUSG00000041235	Chd7	A730019I05Rik|Cycn|Cyn|Dz|Edy|Flo|GENA 47|GENA 60|Gena 52|Lda|Mt|Obt|Todo|WBE1|Whi|metis	chromodomain helicase DNA binding protein 7	protein-coding	Chd7	10503212	0.00831056	0.000130539	24	5	0.147248	8.33777	8.25548	8.1976	8.14988	7.87996	8.06615
320790	chr4-24	chr4	8939173	8939443	+	30.6	0.804	Intergenic	Intergenic	248902	NM_001277149	Mm.138792	NM_001033395	ENSMUSG00000041235	Chd7	A730019I05Rik|Cycn|Cyn|Dz|Edy|Flo|GENA 47|GENA 60|Gena 52|Lda|Mt|Obt|Todo|WBE1|Whi|metis	chromodomain helicase DNA binding protein 7	protein-coding	Chd7	10503212	0.00831056	0.000130539	24	5	0.147248	8.33777	8.25548	8.1976	8.14988	7.87996	8.06615
320790	chr4-1073	chr4	8911542	8911812	+	11.7	0.63	Intergenic	CpG	221271	NM_001277149	Mm.138792	NM_001033395	ENSMUSG00000041235	Chd7	A730019I05Rik|Cycn|Cyn|Dz|Edy|Flo|GENA 47|GENA 60|Gena 52|Lda|Mt|Obt|Todo|WBE1|Whi|metis	chromodomain helicase DNA binding protein 7	protein-coding	Chd7	10503212	0.00831056	0.000130539	24	5	0.147248	8.33777	8.25548	8.1976	8.14988	7.87996	8.06615
235320	chr9-246	chr9	48860528	48860798	+	17.5	0.774	Intergenic	Intergenic	-24718	NM_001033324	Mm.457803	NM_001033324	ENSMUSG00000066687	Zbtb16	AI467657|PLZF|Zfp145|lu	zinc finger and BTB domain containing 16	protein-coding	Zbtb16	10593225	0.0124456	0.00023376	24	0	0.324703	1395.92	1505.78	1402.03	1049.95	1205.15	1535.93
320790	chr4-384	chr4	8647298	8647568	+	12.4	0.7	Intergenic	CpG	-42973	NM_001277149	Mm.138792	NM_001033395	ENSMUSG00000041235	Chd7	A730019I05Rik|Cycn|Cyn|Dz|Edy|Flo|GENA 47|GENA 60|Gena 52|Lda|Mt|Obt|Todo|WBE1|Whi|metis	chromodomain helicase DNA binding protein 7	protein-coding	Chd7	10503220	0.0124456	0.00023376	24	5	0.123772	8.10175	7.99922	8.10874	7.83366	7.80686	7.93151
320790	chr4-24	chr4	8939173	8939443	+	30.6	0.804	Intergenic	Intergenic	248902	NM_001277149	Mm.138792	NM_001033395	ENSMUSG00000041235	Chd7	A730019I05Rik|Cycn|Cyn|Dz|Edy|Flo|GENA 47|GENA 60|Gena 52|Lda|Mt|Obt|Todo|WBE1|Whi|metis	chromodomain helicase DNA binding protein 7	protein-coding	Chd7	10503220	0.0124456	0.00023376	24	5	0.123772	8.10175	7.99922	8.10874	7.83366	7.80686	7.93151
320790	chr4-1073	chr4	8911542	8911812	+	11.7	0.63	Intergenic	CpG	221271	NM_001277149	Mm.138792	NM_001033395	ENSMUSG00000041235	Chd7	A730019I05Rik|Cycn|Cyn|Dz|Edy|Flo|GENA 47|GENA 60|Gena 52|Lda|Mt|Obt|Todo|WBE1|Whi|metis	chromodomain helicase DNA binding protein 7	protein-coding	Chd7	10503220	0.0124456	0.00023376	24	5	0.123772	8.10175	7.99922	8.10874	7.83366	7.80686	7.93151
21929	chr10-735	chr10	18960171	18960441	+	10.2	0.64	Intergenic	Intergenic	51657	NM_001166402	Mm.116683	NM_009397	ENSMUSG00000019850	Tnfaip3	A20|Tnfip3	tumor necrosis factor, alpha-induced protein 3	protein-coding	Tnfaip3	10368144	0.0151421	0.00031003	24	5	0.111518	6.48659	6.3805	6.26044	6.37313	6.3112	6.25057
63953	chr1-199	chr1	184170972	184171242	+	19.7	0.707	Intergenic	Intergenic	136646	NM_022019	Mm.404024	NM_022019	ENSMUSG00000039384	Dusp10	2610306G15Rik|AI158871|MKP-5|MKP5	dual specificity phosphatase 10	protein-coding	Dusp10	10352448	0.0183135	0.00040883	24	10.5	0.254827	614.317	815.443	978.712	900.935	922.35	696.655
18405	chr4-336	chr4	63338483	63338753	+	16	0.8	Intergenic	Intergenic	-5938	NM_008768	Mm.4777	NM_008768	ENSMUSG00000039196	Orm1	Agp-1|Agp-2|Orm-1	orosomucoid 1	protein-coding	Orm1	10505438	0.0220008	0.000536109	24	4	0.122358	47.5232	87.01	40.6412	39.2805	36.4941	40.0539
16401	chr2-562	chr2	79149067	79149337	+	13.1	0.815	Intergenic	Intergenic	-106224	NM_010576	Mm.31903	NM_010576	ENSMUSG00000027009	Itga4	CD49D|Itga4B	integrin alpha 4	protein-coding	Itga4	10473125	0.0220008	0.000536109	24	6	0.192333	254.047	278.565	245.061	215.052	192.939	198.715
384783	chr8-340	chr8	11145315	11145585	+	14.6	0.719	Intergenic	Intergenic	-137020	NM_001081212	Mm.407207	NM_001081212	ENSMUSG00000038894	Irs2	Irs-2	insulin receptor substrate 2	protein-coding	Irs2	10576971	0.0220008	0.000536109	24	13	0.206115	203.302	200.712	267.692	316.074	223.887	210.384
21885	chr4-935	chr4	71968912	71969182	+	10.2	0.708	Intergenic	Intergenic	231846	NM_001285529	Mm.278444	NM_011599	ENSMUSG00000008305	Tle1	C230057C06Rik|Estm14|Grg-1|Grg1|Tle4l	transducin-like enhancer of split 1	protein-coding	Tle1	10513884	0.0220008	0.000536109	24	3.5	0.137596	7.57203	7.35713	7.26305	7.11497	6.97011	7.34876
320790	chr4-384	chr4	8647298	8647568	+	12.4	0.7	Intergenic	CpG	-42973	NM_001277149	Mm.138792	NM_001033395	ENSMUSG00000041235	Chd7	A730019I05Rik|Cycn|Cyn|Dz|Edy|Flo|GENA 47|GENA 60|Gena 52|Lda|Mt|Obt|Todo|WBE1|Whi|metis	chromodomain helicase DNA binding protein 7	protein-coding	Chd7	10503184	0.0220008	0.000536109	24	4.5	0.148683	9.64934	9.52197	9.52994	9.43012	9.30079	9.41152
320790	chr4-384	chr4	8647298	8647568	+	12.4	0.7	Intergenic	CpG	-42973	NM_001277149	Mm.138792	NM_001033395	ENSMUSG00000041235	Chd7	A730019I05Rik|Cycn|Cyn|Dz|Edy|Flo|GENA 47|GENA 60|Gena 52|Lda|Mt|Obt|Todo|WBE1|Whi|metis	chromodomain helicase DNA binding protein 7	protein-coding	Chd7	10503208	0.0220008	0.000536109	24	3.5	0.0562645	7.28738	7.17689	7.2088	7.12923	6.95331	7.0775
320790	chr4-24	chr4	8939173	8939443	+	30.6	0.804	Intergenic	Intergenic	248902	NM_001277149	Mm.138792	NM_001033395	ENSMUSG00000041235	Chd7	A730019I05Rik|Cycn|Cyn|Dz|Edy|Flo|GENA 47|GENA 60|Gena 52|Lda|Mt|Obt|Todo|WBE1|Whi|metis	chromodomain helicase DNA binding protein 7	protein-coding	Chd7	10503184	0.0220008	0.000536109	24	4.5	0.148683	9.64934	9.52197	9.52994	9.43012	9.30079	9.41152
320790	chr4-24	chr4	8939173	8939443	+	30.6	0.804	Intergenic	Intergenic	248902	NM_001277149	Mm.138792	NM_001033395	ENSMUSG00000041235	Chd7	A730019I05Rik|Cycn|Cyn|Dz|Edy|Flo|GENA 47|GENA 60|Gena 52|Lda|Mt|Obt|Todo|WBE1|Whi|metis	chromodomain helicase DNA binding protein 7	protein-coding	Chd7	10503208	0.0220008	0.000536109	24	3.5	0.0562645	7.28738	7.17689	7.2088	7.12923	6.95331	7.0775
320790	chr4-1073	chr4	8911542	8911812	+	11.7	0.63	Intergenic	CpG	221271	NM_001277149	Mm.138792	NM_001033395	ENSMUSG00000041235	Chd7	A730019I05Rik|Cycn|Cyn|Dz|Edy|Flo|GENA 47|GENA 60|Gena 52|Lda|Mt|Obt|Todo|WBE1|Whi|metis	chromodomain helicase DNA binding protein 7	protein-coding	Chd7	10503184	0.0220008	0.000536109	24	4.5	0.148683	9.64934	9.52197	9.52994	9.43012	9.30079	9.41152
320790	chr4-1073	chr4	8911542	8911812	+	11.7	0.63	Intergenic	CpG	221271	NM_001277149	Mm.138792	NM_001033395	ENSMUSG00000041235	Chd7	A730019I05Rik|Cycn|Cyn|Dz|Edy|Flo|GENA 47|GENA 60|Gena 52|Lda|Mt|Obt|Todo|WBE1|Whi|metis	chromodomain helicase DNA binding protein 7	protein-coding	Chd7	10503208	0.0220008	0.000536109	24	3.5	0.0562645	7.28738	7.17689	7.2088	7.12923	6.95331	7.0775
69354	chr15-179	chr15	96915584	96915854	+	17.5	0.758	Intergenic	Intergenic	140237	NM_027052	Mm.250980	NM_027052	ENSMUSG00000022464	Slc38a4	1110012E16Rik|1700012A18Rik|Ata3|mATA3|mNAT3	solute carrier family 38, member 4	protein-coding	Slc38a4	10431915	0.0264474	0.000699194	24	6	0.0688015	1862.98	2024.43	1841.67	1916.56	1615.09	1736.3
69354	chr15-186	chr15	97089709	97089979	+	16.8	0.684	Intergenic	Intergenic	-33888	NM_027052	Mm.250980	NM_027052	ENSMUSG00000022464	Slc38a4	1110012E16Rik|1700012A18Rik|Ata3|mATA3|mNAT3	solute carrier family 38, member 4	protein-coding	Slc38a4	10431915	0.0264474	0.000699194	24	6	0.0688015	1862.98	2024.43	1841.67	1916.56	1615.09	1736.3
17132	chr8-51	chr8	115562439	115562709	+	28.4	0.689	Intergenic	MER94|DNA|hAT-Blackjack	144320	NM_001025577	Mm.275549	NM_001025577	ENSMUSG00000055435	Maf	2810401A20Rik|A230108G15Rik|AW047063|c-maf	avian musculoaponeurotic fibrosarcoma oncogene homolog	protein-coding	Maf	10581992	0.0264474	0.000699194	24	6	0.113986	1386.85	1350.9	1369.37	1353.33	1195.58	1258.33
17132	chr8-422	chr8	115707909	115708179	+	15.3	0.771	Intergenic	CpG	-1150	NM_001025577	Mm.275549	NM_001025577	ENSMUSG00000055435	Maf	2810401A20Rik|A230108G15Rik|AW047063|c-maf	avian musculoaponeurotic fibrosarcoma oncogene homolog	protein-coding	Maf	10581992	0.0264474	0.000699194	24	6	0.113986	1386.85	1350.9	1369.37	1353.33	1195.58	1258.33
17132	chr8-562	chr8	115584493	115584763	+	12.4	0.526	Intergenic	Intergenic	122266	NM_001025577	Mm.275549	NM_001025577	ENSMUSG00000055435	Maf	2810401A20Rik|A230108G15Rik|AW047063|c-maf	avian musculoaponeurotic fibrosarcoma oncogene homolog	protein-coding	Maf	10581992	0.0264474	0.000699194	24	6	0.113986	1386.85	1350.9	1369.37	1353.33	1195.58	1258.33
320790	chr4-384	chr4	8647298	8647568	+	12.4	0.7	Intergenic	CpG	-42973	NM_001277149	Mm.138792	NM_001033395	ENSMUSG00000041235	Chd7	A730019I05Rik|Cycn|Cyn|Dz|Edy|Flo|GENA 47|GENA 60|Gena 52|Lda|Mt|Obt|Todo|WBE1|Whi|metis	chromodomain helicase DNA binding protein 7	protein-coding	Chd7	10503204	0.0264474	0.000699194	24	5	0.0486843	8.1148	8.03472	8.0821	7.99212	7.87289	7.96972
320790	chr4-24	chr4	8939173	8939443	+	30.6	0.804	Intergenic	Intergenic	248902	NM_001277149	Mm.138792	NM_001033395	ENSMUSG00000041235	Chd7	A730019I05Rik|Cycn|Cyn|Dz|Edy|Flo|GENA 47|GENA 60|Gena 52|Lda|Mt|Obt|Todo|WBE1|Whi|metis	chromodomain helicase DNA binding protein 7	protein-coding	Chd7	10503204	0.0264474	0.000699194	24	5	0.0486843	8.1148	8.03472	8.0821	7.99212	7.87289	7.96972
320790	chr4-1073	chr4	8911542	8911812	+	11.7	0.63	Intergenic	CpG	221271	NM_001277149	Mm.138792	NM_001033395	ENSMUSG00000041235	Chd7	A730019I05Rik|Cycn|Cyn|Dz|Edy|Flo|GENA 47|GENA 60|Gena 52|Lda|Mt|Obt|Todo|WBE1|Whi|metis	chromodomain helicase DNA binding protein 7	protein-coding	Chd7	10503204	0.0264474	0.000699194	24	5	0.0486843	8.1148	8.03472	8.0821	7.99212	7.87289	7.96972
57810	chr9-635	chr9	35421180	35421450	+	12.4	0.633	Intergenic	CpG	-30761	NM_021339	Mm.80509	NM_021339	ENSMUSG00000038119	Cdon	CDO|Cd0|Orcam	cell adhesion molecule-related/down-regulated by oncogenes	protein-coding	Cdon	10584208	0.0316242	0.000907061	24	8.5	0.102856	325.19	337.492	364.047	349.789	315.919	290.632
57778	chr11-272	chr11	103159044	103159314	+	20.4	0.756	Intergenic	Intergenic	-11959	NM_019679	Mm.138913	NM_019679	ENSMUSG00000055805	Fmnl1	8030453N10Rik|AI553564|Fmnl|Fnrl|Frls	formin-like 1	protein-coding	Fmnl1	10381708	0.0316242	0.000907061	24	5	0.177052	109.55	131.817	112.575	93.6859	90.5065	89.1529
12389	chr6-920	chr6	17359317	17359587	+	10.2	0.789	Intergenic	Intergenic	51812	NM_001243064	Mm.28278	NM_007616	ENSMUSG00000007655	Cav1	Cav|Cav-1	caveolin 1, caveolae protein	protein-coding	Cav1	10536499	0.0316242	0.000907061	24	6	0.0537401	10.5307	10.7474	10.7395	10.7669	10.3762	10.4378
23965	chr8-92	chr8	48755526	48755796	+	24.8	0.684	Intergenic	Intergenic	-80971	NM_011857	Mm.42191	NM_011857	ENSMUSG00000031561	Tenm3	2610100B16Rik|Odz1|Odz3|Ten-m3|mKIAA1455	teneurin transmembrane protein 3	protein-coding	Odz3	10578649	0.0316242	0.000907061	24	12.5	0.117963	7.80151	7.89836	8.0743	8.25695	8.03266	8.04045
320790	chr4-384	chr4	8647298	8647568	+	12.4	0.7	Intergenic	CpG	-42973	NM_001277149	Mm.138792	NM_001033395	ENSMUSG00000041235	Chd7	A730019I05Rik|Cycn|Cyn|Dz|Edy|Flo|GENA 47|GENA 60|Gena 52|Lda|Mt|Obt|Todo|WBE1|Whi|metis	chromodomain helicase DNA binding protein 7	protein-coding	Chd7	10503194	0.0316242	0.000907061	24	4.5	0.129386	7.92401	7.92822	7.7646	7.82089	7.44272	7.71961
320790	chr4-384	chr4	8647298	8647568	+	12.4	0.7	Intergenic	CpG	-42973	NM_001277149	Mm.138792	NM_001033395	ENSMUSG00000041235	Chd7	A730019I05Rik|Cycn|Cyn|Dz|Edy|Flo|GENA 47|GENA 60|Gena 52|Lda|Mt|Obt|Todo|WBE1|Whi|metis	chromodomain helicase DNA binding protein 7	protein-coding	Chd7	10503161	0.0316242	0.000907061	24	4	0.0540654	9.21675	9.2592	9.20195	9.16636	8.84192	9.25226
320790	chr4-24	chr4	8939173	8939443	+	30.6	0.804	Intergenic	Intergenic	248902	NM_001277149	Mm.138792	NM_001033395	ENSMUSG00000041235	Chd7	A730019I05Rik|Cycn|Cyn|Dz|Edy|Flo|GENA 47|GENA 60|Gena 52|Lda|Mt|Obt|Todo|WBE1|Whi|metis	chromodomain helicase DNA binding protein 7	protein-coding	Chd7	10503194	0.0316242	0.000907061	24	4.5	0.129386	7.92401	7.92822	7.7646	7.82089	7.44272	7.71961
320790	chr4-24	chr4	8939173	8939443	+	30.6	0.804	Intergenic	Intergenic	248902	NM_001277149	Mm.138792	NM_001033395	ENSMUSG00000041235	Chd7	A730019I05Rik|Cycn|Cyn|Dz|Edy|Flo|GENA 47|GENA 60|Gena 52|Lda|Mt|Obt|Todo|WBE1|Whi|metis	chromodomain helicase DNA binding protein 7	protein-coding	Chd7	10503161	0.0316242	0.000907061	24	4	0.0540654	9.21675	9.2592	9.20195	9.16636	8.84192	9.25226
320790	chr4-1073	chr4	8911542	8911812	+	11.7	0.63	Intergenic	CpG	221271	NM_001277149	Mm.138792	NM_001033395	ENSMUSG00000041235	Chd7	A730019I05Rik|Cycn|Cyn|Dz|Edy|Flo|GENA 47|GENA 60|Gena 52|Lda|Mt|Obt|Todo|WBE1|Whi|metis	chromodomain helicase DNA binding protein 7	protein-coding	Chd7	10503194	0.0316242	0.000907061	24	4.5	0.129386	7.92401	7.92822	7.7646	7.82089	7.44272	7.71961
320790	chr4-1073	chr4	8911542	8911812	+	11.7	0.63	Intergenic	CpG	221271	NM_001277149	Mm.138792	NM_001033395	ENSMUSG00000041235	Chd7	A730019I05Rik|Cycn|Cyn|Dz|Edy|Flo|GENA 47|GENA 60|Gena 52|Lda|Mt|Obt|Todo|WBE1|Whi|metis	chromodomain helicase DNA binding protein 7	protein-coding	Chd7	10503161	0.0316242	0.000907061	24	4	0.0540654	9.21675	9.2592	9.20195	9.16636	8.84192	9.25226
22779	chr1-120	chr1	69456697	69456967	+	25.5	0.809	Intergenic	(TTAGGG)n|Simple_repeat|Simple_repeat	229128	NM_011770	Mm.106343	NM_011770	ENSMUSG00000025997	Ikzf2	A730095J18Rik|Helios|Zfpn1a2|Znfn1a2	IKAROS family zinc finger 2	protein-coding	Ikzf2	10355312	0.0373613	0.00117065	24	8	0.0499642	293.133	325.729	332.576	317.957	282.334	289.049
22779	chr1-1345	chr1	69687590	69687860	+	8.75	0.667	Intergenic	Intergenic	-1765	NM_011770	Mm.106343	NM_011770	ENSMUSG00000025997	Ikzf2	A730095J18Rik|Helios|Zfpn1a2|Znfn1a2	IKAROS family zinc finger 2	protein-coding	Ikzf2	10355312	0.0373613	0.00117065	24	8	0.0499642	293.133	325.729	332.576	317.957	282.334	289.049
15467	chr5-829	chr5	143817915	143818185	+	10.9	0.607	Intergenic	CpG	-53812	NM_013557	Mm.389709	NM_013557	ENSMUSG00000029613	Eif2ak1	HCR|Hri	eukaryotic translation initiation factor 2 alpha kinase 1	protein-coding	Eif2ak1	10527252	0.0373613	0.00117065	12	11	0.0539735	494.511	469.028	490.255	489.783	454.101	475.364
11461	chr5-147	chr5	142916723	142916993	+	21.9	0.738	Intergenic	Intergenic	-10104	NM_007393	Mm.328431	NM_007393	ENSMUSG00000029580	Actb	Actx|E430023M04Rik|beta-actin	actin, beta	protein-coding	Actb	10535381	0.0373613	0.00117065	24	6	0.117238	6179.61	7652.42	6907.75	6797.55	5895.1	5834.93
232087	chr6-271	chr6	72473771	72474041	+	16.8	0.49	Intergenic	Intergenic	-34348	NM_145569	Mm.29815	NM_145569	ENSMUSG00000053907	Mat2a	D630045P18Rik	methionine adenosyltransferase II, alpha	protein-coding	Mat2a	10545417	0.0373613	0.00117065	24	18	0.141916	3452.92	2918.68	2981.45	3558.37	3722.1	3760.22
387524	chr6-578	chr6	54771312	54771582	+	12.4	0.769	Intergenic	MLT1F|LTR|ERVL-MaLR	-45469	NM_199143	Mm.286149	NM_199143	ENSMUSG00000058446	Znrf2	1190002C14Rik|AU044205|D6Ertd365e	zinc and ring finger 2	protein-coding	Znrf2	10538413	0.0442516	0.00150322	12	2	0.0553099	411.446	398.305	383.141	416.667	411.78	381.651
238405	chr12-541	chr12	113424787	113425057	+	10.2	0.515	Intergenic	(CAGCT)n|Simple_repeat|Simple_repeat	-64643	NM_001009545	Mm.442216	NM_001009545	ENSMUSG00000051804	Adam6b	4930523C11Rik	a disintegrin and metallopeptidase domain 6B	protein-coding	Adam6b	10399024	0.0442516	0.00150322	12	7	0.102856	20.0589	21.3901	22.1868	18.5798	20.6208	22.7315
[truncated: 6,818 more rows]
