# Supplementary material for: MYOD1 functions as a clock amplifier as well as a critical co-factor for downstream circadian gene expression in muscle
Source: eLife. 2019 Feb 21;8:e43017. doi: 10.7554/eLife.43017 (PMC6398978; doi:10.7554/eLife.43017)
Supplement: Supplementary file 2. [file elife-43017-supp2.xlsx]

## Sheet: MYOD1_GO
TermID	Term	Enrichment	logP	Genes in Term	Target Genes in Term	Fraction of Targets in Term	Total Target Genes	Total Genes	Entrez Gene IDs	Gene Symbols
GO:0044237	cellular metabolic process	2.15808e-138	-316.988	6958	2907	0.457291	6357	20933	69270,109113,70750,228003,66459,19155,22289,74302,67923,320720,15423,68833,17864,269704,101437,66317,223753,227334,21812,52830,69597,114641,66212,18242,108150,12868,18519,80744,66131,26363,78038,26419,232334,23825,70601,73218,20916,12447,216820,14751,16337,68291,50790,71991,68133,268859,11717,19941,16430,109161,11674,192292,26451,108961,67014,66154,54391,20595,19053,67115,320438,74414,51786,15312…	Gins1,Uhrf2,Kdsr,Klhl41,Pyurf,Npepps,Kdm6a,Mtmr3,Eloc,Fastkd1,Hoxc4,Pdcl3,Mybl1,Zfp664,Dhx32,Wdr61,Cerk,Usp40,Tgfbr1,Pnrc2,Afg3l2,Rpl31,Sec61b,Oat,Galnt7,Cox8a,Kat2b,Cwc22,Tipin,Btd,Mccc2,Mapk8,Vgll4,Banf1,Ecd,Sppl2b,Sucla2,Ccne1,Dhrs7b,Gpi1,Insr,Mto1,Acsl4,Ercc8,Gcsh,Rbfox1,Ampd3,Rpl26,Stt3a,Ube2q2,Aldoa,Nrbp1,Rpl27a,E2f8,Mina,Tmem14c,Rfk,Smn1,Ppp2cb,Rpl14,Alg6,Polr3c,Cpsf2,Hmgn1,Dhx37,Gorasp1,O…
GO:0044260	cellular macromolecule metabolic process	4.17205e-127	-291	5341	2331	0.366682	6357	20933	64685,107045,235323,109900,67039,71151,231130,19883,72180,107823,211986,70885,68184,72026,217410,11532,224014,234594,224170,11911,66070,74490,22640,218232,228410,50787,16168,665775,76784,319901,50907,66585,94093,27049,387314,22278,54607,19042,29871,66997,78787,70097,17355,12532,15900,20088,21951,67988,72568,77065,68272,67471,269003,12370,67996,217864,11364,242083,67781,67328,64657,66513,17684,562…	Nmi,Lars,Usp28,Asl,Rbm25,Eri2,Tnip2,Rora,Zfp661,Whsc1,Tmem18,Ints10,Denr,Trmu,Trib2,Adh5,Fgd4,Cnot1,Dzip3,Atf4,Cwc15,Mamstr,Zfp1,Ptpdc1,Cstf3,Hs6st3,Il15,Bod1l,Mtif2,Dsel,Preb,Snrnp40,Trim33,Etv3,Tmtc1,Usf1,Socs6,Ppm1a,Scmh1,Psmd12,Usp54,Sash1,Aff1,Cdc25c,Irf8,Rps24,Tnks,Tmx3,Lin9,Ints7,Rbm28,Gpatch1,Sap130,Casp8,Srsf6,Rcor1,Acadm,Ppm1l,Ilf2,Lyzl1,Mrps10,Tab1,Cited2,Hdac7,Hsf2bp,Ing2,Fam175b,Rnf1…
GO:0008152	metabolic process	4.22326e-121	-277.172	7894	3157	0.496618	6357	20933	66887,217069,56317,244059,170762,27402,17764,67738,18559,18789,66362,72692,51869,56291,20230,227331,14590,17931,68428,57808,13132,17295,15211,110391,30946,18114,14245,66200,240880,103583,56805,51886,69962,433931,26462,403183,100978,78783,74427,213389,52033,55951,433693,55982,226169,14645,20229,24015,114714,67563,27369,19826,28019,66960,223775,27357,74007,71881,434246,17132,17127,270627,19089,2124…	Lonp2,Trim25,Anapc7,Chd2,Nup155,Pdhx,Mtf1,Ppid,Pctp,Papola,Exosc3,Hnrnpll,Rif1,Styx,Satb1,Gigyf2,Ggh,Ppp1r12a,Steap3,Rpl35a,Dab2,Met,Hexa,Qdpr,Abt1,Rrp1,Lpin1,Commd6,Scyl3,Fbxw11,Zbtb33,Fubp1,Mettl18,Pigg,Txnrd2,Mettl21e,Nfxl1,Brpf1,Eaf1,Prdm9,Pbk,Mpc1,Akirin2,Paxip1,Pprc1,Glul,Sat1,Abce1,Rad51c,Narfl,Dguok,Rnps1,Ing4,Fam188a,Pim3,Gyg,Btbd11,Apmap,Trim72,Maf,Smad3,Taf1,Prkcsh,Lactb2,Ahcyl1,Trmt10…
GO:0071704	organic substance metabolic process	7.54501e-119	-271.987	7502	3024	0.475696	6357	20933	66659,14169,67230,94061,69305,67452,195733,71567,208211,77432,22661,12638,70767,272158,664883,72459,674895,71148,19062,15213,14229,14775,114663,235461,320951,224045,66258,11908,211347,15278,58800,240892,74133,12369,233789,66999,67733,231413,19305,54422,76829,16434,207958,216134,66810,19172,192196,72774,11907,12458,13649,100715,73158,12368,230796,236511,77559,81004,15450,13872,56297,20851,11554,69…	Acp6,Fgf14,Zfp329,Mrpl1,Dcps,Pnpla8,Grhl1,Mcm9,Alg1,9530002B09Rik,Zfp148,Cftr,Prpf3,Poln,Nova1,Htatsf1,Nek10,Mier1,Inpp5k,Hey1,Fkbp5,Gpx1,Impa2,Fam63b,Pisd,Eif2b5,Mrps17,Atf1,Pank3,Tfb2m,Trpm7,Dusp27,Smg8,Casp7,Smg1,Med28,Itgb3bp,Grsf1,Pex5,Barhl1,Dok5,Itpa,Alg11,Pdxk,Rbm22,Psmb4,Luc7l2,Neil1,Ate1,Ccr6,Egfr,Papd4,Larp1,Casp6,Wdtc1,Ago1,Agl,Tbl1xr1,Lipc,Ercc3,Arl6,Stat5b,Adrb1,Apitd1,Adam12,Ascc2,…
GO:0044238	primary metabolic process	1.00434e-117	-269.398	7121	2897	0.455718	6357	20933	54473,13982,12394,217732,26565,64424,93736,228019,18028,11308,72461,22780,72149,56009,319945,80751,70127,73569,66743,23874,73389,71723,235028,242509,76915,99382,67958,68966,233033,20917,66422,56504,66373,271981,223435,74450,381305,74434,320011,19170,19946,14423,26416,14043,66172,56706,76867,76522,101685,14281,13669,329908,69807,22130,73713,12352,18571,56292,66075,107995,20112,27681,140499,71330,5…	Tollip,Esr1,Runx1,Cipc,Pla2g10,Polr1e,Aff4,Mettl8,Nfib,Abi1,Prcp,Ikzf3,Strada,Alyref2,Flad1,Rnf34,Dpf3,Vgll3,Rnf220,Farsb,Hbp1,Dhx34,Zfp426,Bnc2,Mnd1,Abtb2,U2surp,Ngdn,Samd4b,Suclg2,Dctpp1,Srpk3,Lsm5,Tbck,Trio,Pank2,Rc3h1,Sohlh2,Uggt1,Psmb1,Rpl30,Galnt1,Mapk14,Ext2,Med11,Ccnl1,Rhbdd1,Lsm8,Spty2d1,Fos,Eif3a,Usp24,Trim32,Ttf1,Rbm20,Car5a,Pdcd6ip,Naa10,Chchd3,Cdc20,Rps6ka2,Snf8,Ube2j2,Rcbtb1,Icmt,Gu…
GO:0043170	macromolecule metabolic process	2.04849e-105	-241.054	5923	2462	0.38729	6357	20933	11303,17776,66877,66354,74108,22022,14066,26390,74016,71793,83962,13211,71101,75812,67288,207785,217038,68366,56070,268697,21834,66268,69192,94230,76130,74467,245269,58231,71242,110809,226830,108121,65020,17131,67967,76199,68038,18624,212898,545622,68440,192170,52846,103136,19821,224897,18294,69263,22367,71093,17308,216080,14084,68961,66136,110173,238693,104263,11502,226182,219132,27395,68031,208…	Abca1,Mast2,Crnkl1,Snw1,Parn,Tpst2,F3,Mapkbp1,Phf19,Ints12,Btbd1,Dhx9,Uvssa,Tasp1,Srek1ip1,Csrnp2,Mrm1,Tmem129,Tcerg1,Ccnb1,Thrb,Pigyl,Dhx16,Cpsf1,Las1l,Pus10,Nim1k,Stk4,Spata24,Srsf1,Smyd2,U2af1,Zfp110,Smad7,Pold3,Med13l,Chid1,Pepd,Dse,Ptpn3,Dusp23,Eif4a3,Cnot11,Pwp1,Rnf2,Dpp9,Ogg1,Rfc3,Vrk1,Atoh8,Mgat1,Ube2d1,Faf1,Phkg2,Znrd1,Manba,Zfp58,Kdm3a,Adam9,Taf5,Phf11d,Mrpl15,Rnf146,Creb3l2,Pabpc1,Hist…
GO:0034641	cellular nitrogen compound metabolic process	7.41343e-97	-221.347	4053	1793	0.282051	6357	20933	69009,22061,67667,20947,19134,17191,74097,69902,11538,107569,19358,240255,17686,108655,320244,67959,66874,12729,276919,78294,18996,99730,69034,23967,18641,17380,225497,72949,21871,67466,77128,114741,72614,192197,12053,217127,67381,101592,245695,97165,16832,22678,15499,100042807,232816,20102,216578,214855,26987,71169,235559,15259,17260,11837,327987,56422,68626,16815,69131,66055,233826,17161,11992,…	Thap7,Trp63,Alkbh8,Swap70,Prpf4b,Mbd2,Pop7,Mrto4,Adnp,Nt5c3,Rad23a,Ythdc2,Msh3,Foxp1,Ttll5,Puf60,Ncbp3,Clns1a,Gemin4,Rps27a,Pou4f1,Taf13,Nupr1l,Osr1,Pfkl,Mme,Fam170a,Ccnt2,Atp6v0a2,Pdcl,Crebrf,Supt16,Pih1d2,Bcas3,Bcl6,Kat7,Med4,Efl1,Tceanc,Hmgb2,Ldhb,Zfp2,Hsf1,Eif3j2,Zfp628,Rps4x,Papolg,Arid5a,Eif4e2,Nbas,Topbp1,Hipk3,Mef2c,Rplp0,Med13,Hbs1l,Elac2,Lbx2,Cdk12,Sf3b6,Palb2,Maoa,Auh,Ndufc2,Zkscan1,Dd…
GO:0006807	nitrogen compound metabolic process	2.17169e-91	-208.76	4384	1892	0.297625	6357	20933	67471,67958,76915,68966,233033,77065,68263,72568,66422,68272,17355,70127,319945,15900,20088,73569,110198,71723,235028,23874,73389,242509,18028,93736,67383,67996,217864,11364,22780,56009,13982,12394,217732,269003,114640,64424,66172,66585,14043,56706,14281,101685,76522,50907,76784,319901,381305,74450,74434,665775,26416,19946,269378,29871,11964,66373,27049,94093,22278,387314,11911,22715,234594,66070…	Gpatch1,U2surp,Mnd1,Ngdn,Samd4b,Ints7,Pdhb,Lin9,Dctpp1,Rbm28,Aff1,Dpf3,Flad1,Irf8,Rps24,Vgll3,Akr7a5,Dhx34,Zfp426,Farsb,Hbp1,Bnc2,Nfib,Aff4,Carnmt1,Srsf6,Rcor1,Acadm,Ikzf3,Alyref2,Esr1,Runx1,Cipc,Sap130,Pth2,Polr1e,Med11,Snrnp40,Ext2,Ccnl1,Fos,Spty2d1,Lsm8,Preb,Mtif2,Dsel,Rc3h1,Pank2,Sohlh2,Bod1l,Mapk14,Rpl30,Ahcy,Scmh1,Atp6v1a,Lsm5,Etv3,Trim33,Usf1,Tmtc1,Atf4,Zfp57,Cnot1,Cwc15,Mcts2,Mamstr,Ddx50…
GO:0006139	nucleobase-containing compound metabolic process	9.75636e-83	-188.837	3507	1556	0.24477	6357	20933	13046,18597,19726,12183,22685,226414,223527,69752,11865,11793,57317,17126,18575,232449,56353,21676,20846,22337,69716,18573,17454,80892,56249,70620,67778,70650,77040,12753,229279,102462,12023,215193,69596,67797,229663,20017,66707,12858,56190,208836,22779,66310,11975,223701,72504,66978,68240,66725,208718,74044,17190,225027,70225,66152,79455,15204,72831,268566,22642,433759,228980,21415,55989,76367,6…	Celf1,Pdha1,Rfx3,Bpgm,Zfp239,Dars,Eny2,Zfp511,Arntl,Atg5,Srsf4,Smad2,Pde1c,Dera,Rybp,Tead1,Stat1,Vdr,Trip13,Pde1a,Mov10,Zfhx4,Actr8,Ube2v2,Zfp639,Zcchc8,Atg16l1,Clock,Hnrnpa3,Imp3,Barx2,Diexf,Ap5s1,Snrnp48,Csde1,Polr1b,Nkapl,Cox5a,Rbm38,Fanci,Ikzf2,Dpy30,Atp6v0a1,Mkl1,Taf4b,Luc7l,Rpa3,Lrrk2,Dis3l2,Ttf2,Mbd1,Srsf7,Ppil3,Uqcr10,Pdcl2,Herc2,Dhx30,Gphn,Zbtb17,Hdac1,Taf4,Tcf7l1,Nop58,Trp53rkb,Mphosph6…
GO:0046483	heterocycle metabolic process	3.86243e-82	-187.461	3636	1600	0.251691	6357	20933	101685,14281,76522,66172,66585,56706,74434,26416,665775,50907,74450,381305,29871,11964,269378,27049,94093,22278,387314,66373,77065,233033,72568,68263,68272,66422,67958,67471,76915,68966,235028,71723,23874,73389,242509,70127,17355,319945,15900,20088,73569,22780,56009,18028,93736,217864,67996,269003,114640,64424,13982,12394,217732,216825,24074,15257,67039,326622,66588,64685,228889,235323,107045,198…	Spty2d1,Fos,Lsm8,Med11,Snrnp40,Ccnl1,Sohlh2,Mapk14,Bod1l,Preb,Pank2,Rc3h1,Scmh1,Atp6v1a,Ahcy,Etv3,Trim33,Usf1,Tmtc1,Lsm5,Ints7,Samd4b,Lin9,Pdhb,Rbm28,Dctpp1,U2surp,Gpatch1,Mnd1,Ngdn,Zfp426,Dhx34,Farsb,Hbp1,Bnc2,Dpf3,Aff1,Flad1,Irf8,Rps24,Vgll3,Ikzf3,Alyref2,Nfib,Aff4,Rcor1,Srsf6,Sap130,Pth2,Polr1e,Esr1,Runx1,Cipc,Usp22,Taf7,Hipk1,Rbm25,Upf2,Cmpk1,Nmi,Ddx27,Usp28,Lars,Rora,Tnip2,Extl2,Zfp661,Whsc1…
GO:0006725	cellular aromatic compound metabolic process	1.04546e-79	-181.86	3689	1611	0.253421	6357	20933	70047,66921,19878,17535,78651,106389,66618,58202,12393,11834,74164,18099,57316,73754,68045,214150,246103,231991,12224,22698,20481,69792,12142,51786,15312,208144,26909,56404,110960,74414,100019,104348,98758,22701,381101,26428,244694,73694,108961,103836,11674,19941,19090,67115,20595,66154,67014,68291,71991,14751,26380,12447,11717,382985,268859,75901,28015,18148,21761,12862,57434,12190,23825,232334,…	Trnt1,Prpf38b,Rock2,Mre11a,Lsm6,Eaf2,Snrnp27,Nelfb,Runx2,Aqr,Nfx1,Nlk,C1d,Thap1,2700060E02Rik,Ago3,Atxn7,Creb5,Klf5,Zfp39,Ski,Med6,Prdm1,Cpsf2,Hmgn1,Dhx37,Exo1,Trip4,Tars,Polr3c,Mdn1,Zfp120,Hnrnpf,Zfp41,Dnph1,Orc4,Kdm4d,Ndufaf7,E2f8,Zfp692,Aldoa,Rpl26,Prkdc,Rpl14,Smn1,Tmem14c,Mina,Mto1,Ercc8,Gpi1,Esrrb,Ccne1,Ampd3,Rrm2b,Rbfox1,Dcp1a,Polr2m,Npm1,Morf4l1,Cox6a2,Xrcc2,Brca2,Banf1,Vgll4,Ecd,Mccc2,Kat…
GO:1901360	organic cyclic compound metabolic process	7.32104e-76	-173.006	3873	1663	0.261601	6357	20933	71701,94223,209584,93686,56749,77110,23942,15407,20637,19363,20847,106052,56012,108686,19885,67619,78688,76167,213054,170791,226442,212728,170459,15289,68646,66416,20384,330502,14300,56456,13121,19302,56428,21339,14007,320209,66942,53893,69241,68106,18521,20375,26384,18605,15357,105372,11819,54194,97827,12827,338523,235469,67487,19714,18986,71952,22083,66549,74157,57432,72290,18648,22629,18142,12…	Pnpt1,Dgcr8,Tyw3,Rbfox2,Dhodh,Gpbp1l1,Mta2,Hoxb1,Snrnp70,Rad51b,Stat2,Fbxo4,Pgam2,Ccdc88a,Rorc,Nob1,Nol3,Snrnp35,Gabpb2,Rbm39,Zfp281,Tarbp1,Stard4,Hmgb1,Nadk2,Ndufa7,Srsf5,Zfp82,Frg1,Actl6a,Cyp51,Pex2,Mtch2,Taf1a,Celf2,Ddx11,Ddx18,Nudt5,Polr2d,Nt5c3b,Pcbp2,Spi1,Gnpda1,Enpp1,Hmgcr,Utp15,Nr2f2,Akap8l,Exd2,Col4a2,Kdm7a,Zfp280d,Dhx40,Rev3l,Pou2f1,2410016O06Rik,Ctr9,Aggf1,Cmtr1,Zc3h8,Lsm11,Pgam1,Ywhah…
GO:0090304	nucleic acid metabolic process	1.35871e-72	-165.48	3065	1366	0.214881	6357	20933	14461,192191,27354,19017,13433,20024,56736,29808,73247,234733,18740,19720,56296,244879,56215,20679,66875,319583,72662,66143,232314,101861,75178,77035,19687,103135,59014,67242,12785,15402,56541,70208,56417,69237,22690,83561,56399,93697,98403,23808,67065,12572,100710,16476,67848,17219,353170,223513,57905,65961,26409,21853,232791,13813,66583,227099,51810,328110,109333,56878,207615,21847,67241,78610,…	Gata2,Med9,Nbn,Ppargc1a,Dnmt1,Sub1,Rnf14,Mga,Mrgbp,Ddx19b,Pitx1,Trim27,Dmrtb1,Npat,Acin1,Sox6,Swt1,Lig4,Dis3,Eef1e1,Ppp4r2,Ints4,Meiob,Kdm8,Rfc1,Pan2,Rrs1,Gemin6,Cnbp,Hoxa5,Habp4,Med23,Adar,Gtpbp4,Zfp28,Tdrd1,Akap8,Ice2,Zfp451,Ash2l,Polr3d,Cdk7,Pds5b,Jun,Ddx55,Mcm6,Txlng,Abra,Isy1,Utp3,Map3k7,Timeless,Cnot3,Eomes,Exosc1,Pms1,Hnrnpu,Prpf39,Pkn2,Rbms1,Wdr37,Klf10,Smc6,Uvrag,Gabpb1,Zc3h3,Ep300,Scaf1…
GO:0010467	gene expression	5.33749e-66	-150.296	2940	1300	0.204499	6357	20933	209707,83602,14815,243905,68193,23849,382056,68153,74754,217715,67427,30046,14056,20588,56529,28000,19944,59054,94112,72133,271842,233802,68975,231386,22026,68278,654801,18046,66213,20815,56200,22385,217031,208117,66161,66118,81879,219158,20639,66094,109075,68927,212679,474156,14911,21420,211151,27878,74322,72416,264064,72567,69085,66660,28071,170936,68463,11863,20901,211006,233060,11797,225160,6…	Lcorl,Gtf2a1,Nr3c1,Zfp568,Rpl24,Klf6,Crtc1,Gtf2e2,Dhcr24,Eif2b2,Rps20,Zfp292,Ezh2,Smarcc1,Sec11a,Prpf19,Rpl29,Mrps30,Med15,Trub1,Rpusd2,Thumpd1,Med27,Ythdc1,Nr2c2,Ddx39,Zfp784,Nfyc,Med7,Srpk1,Ddx21,Baz1b,Tada2a,Aph1b,Pop4,Sarnp,Tfcp2l1,Ccar2,Snrpb2,Lsm7,Exosc4,Ptcd2,Mars2,Zbtb9,Thumpd3,Tfap2c,Churc1,Tada1,Cxxc1,Lrpprc,Cdk8,Bclaf1,Zcchc9,Sltm,Twistnb,Zfp369,Mrpl14,Arnt,Strap,Sepsecs,Zfp382,Birc2,T…
GO:0016070	RNA metabolic process	6.11143e-62	-140.95	2649	1182	0.185937	6357	20933	77110,71701,94223,209584,93686,20847,20637,15407,76167,78688,67619,213054,170791,19885,330502,20384,14300,56456,212728,226442,21339,69241,14007,320209,66942,105372,18521,20375,54194,11819,18986,71952,235469,12827,338523,67487,66549,22083,74157,78581,18142,57432,72290,14050,12395,68016,213464,233410,101214,319955,93760,22764,99890,229906,15904,68209,229512,22722,17342,78893,51813,105148,22697,5386…	Gpbp1l1,Pnpt1,Dgcr8,Tyw3,Rbfox2,Stat2,Snrnp70,Hoxb1,Snrnp35,Nol3,Nob1,Gabpb2,Rbm39,Rorc,Zfp82,Srsf5,Frg1,Actl6a,Tarbp1,Zfp281,Taf1a,Polr2d,Celf2,Ddx11,Ddx18,Utp15,Pcbp2,Spi1,Akap8l,Nr2f2,Pou2f1,2410016O06Rik,Zfp280d,Col4a2,Kdm7a,Dhx40,Aggf1,Ctr9,Cmtr1,Utp23,Npas1,Zc3h8,Lsm11,Eya3,Runx1t1,Murc,Rbbp5,Zfp592,Tra2a,Ercc6,Arid1a,Zfx,Prmt6,Gtf2b,Id4,Rnaseh2c,Smg5,Zfp64,Mitf,Cnot10,Ccnc,Iars,Zscan21,Zra…
GO:0044267	cellular protein metabolic process	1.33268e-57	-130.96	2683	1180	0.185622	6357	20933	116904,107895,67921,72607,14254,71956,12168,230484,18198,321008,76454,67338,208727,229317,50995,56412,108148,192157,68734,70470,17257,214899,223455,64050,12912,81004,13872,320119,56297,269181,20014,19172,14225,11907,13649,73158,17169,109115,240892,233789,76829,207958,26931,674895,66053,68943,78334,14229,14775,69527,235461,224045,66258,78757,319195,58800,14169,94061,381113,208211,77432,107227,6728…	Alpk3,Mgat5,Ube2f,Usp13,Flt1,Rnf135,Bmpr2,Usp1,Musk,6330408A02Rik,Fbxo31,Rffl,Hdac4,Eif2a,Uba2,Noa1,Galnt2,Socs7,Smek1,Rprd1b,Mecp2,Kdm5a,March6,Yeats4,Creb1,Tbl1xr1,Ercc3,Rps6kc1,Arl6,Mgat4a,Rpn2,Psmb4,Fkbp1a,Ate1,Egfr,Larp1,Mark3,Supt3,Dusp27,Smg1,Dok5,Alg11,Ppp2r5c,Nek10,Ppil2,Pink1,Cdk19,Fkbp5,Gpx1,Mrps9,Fam63b,Eif2b5,Mrps17,Rictor,Rpl17,Trpm7,Fgf14,Mrpl1,Cdkl4,Alg1,9530002B09Rik,Macrod1,Rpl3…
GO:0071840	cellular component organization or biogenesis	3.37215e-56	-127.729	4794	1904	0.299512	6357	20933	226747,230908,56443,19299,215387,17692,66993,117197,100503386,16412,53890,17258,69821,57752,235380,68877,11641,12211,331461,70088,13666,57342,18011,66537,70575,140858,226519,76740,217827,71514,319189,53331,21371,60595,22359,100226,12725,20655,229681,14365,50927,15212,71393,56863,114874,20813,27058,18563,101314,192285,20922,18484,57296,52463,23892,17120,56088,56075,225326,26951,98376,70683,67941,1…	Ahctf1,Tardbp,Arpc1a,Abcd3,Ncaph,Msl3,Smarcd3,Bloc1s4,Tpbgl,Itgb1,Sart3,Mef2a,Mterf4,Tacc2,Dmxl2,Maf1,Akap2,Birc6,Il1rapl1,Meaf6,Eif2ak3,Parva,Neurl1a,Pomp,Gfod2,Wdr5,Lamc1,Efr3a,Nrde2,Sfpq,Hist2h2bb,Stx7,Tbca,Actn4,Vldlr,Stx12,Clcn3,Sod1,St7l,Fzd3,Nasp,Hexb,Kctd6,Cldn9,Ddhd1,Srp14,Srp9,Pcx,Brk1,Phf21a,Supt4a,Pam,Psmd8,Tet1,Grem1,Mad1l1,Psmg1,Pdss1,Pik3c3,Zw10,Gorab,Utp20,Rps27l,Napg,Frmd6,Ulk2,A…
GO:0044249	cellular biosynthetic process	1.19554e-54	-124.161	3398	1422	0.22369	6357	20933	56412,21745,229317,16882,56442,330301,241322,320267,108148,54375,70456,20788,20583,208727,104923,353187,75986,72400,228869,71147,269585,270096,54342,80292,12168,107895,241447,269181,208104,56297,321000,69928,20851,236511,13872,81004,15450,214899,11991,72475,14873,17257,68393,12912,11534,64050,21974,21685,13026,75452,13559,70470,320271,195522,54422,19305,67733,216134,19016,207958,66999,13649,19286…	Noa1,Tep1,Eif2a,Lig3,Serinc1,Zfp786,Zbtb6,Fubp3,Galnt2,Azin1,Mpc2,Srebf2,Snai2,Hdac4,Adi1,Nr1d2,Agmat,Pinx1,Ncoa5,Oxsm,Zscan20,Mon1b,Gnpnat1,Zxdc,Bmpr2,Mgat5,Cers6,Mgat4a,Mlxip,Arl6,Lrif1,Apitd1,Stat5b,Ago1,Ercc3,Tbl1xr1,Lipc,Kdm5a,Hnrnpd,Ssbp3,Gsto1,Mecp2,Mogat1,Creb1,Adk,Yeats4,Top2b,Tef,Pcyt1a,Ascc2,E2f5,Rprd1b,Scai,Zfp691,Barhl1,Pex5,Itgb3bp,Pdxk,Pparg,Alg11,Med28,Egfr,Pts,Tbrg1,Kank2,Cnot6,G…
GO:0009058	biosynthetic process	5.72058e-53	-120.293	3558	1471	0.231398	6357	20933	100900,50873,18193,228913,192185,53412,52615,12914,545725,19015,71807,215031,20512,100336,235134,104382,76022,18618,114142,51797,13690,22247,67781,64657,75302,208449,24075,22596,319554,12922,11569,71883,74377,69260,17684,56233,226470,57782,72749,15404,231070,12764,21982,238505,68055,22025,56207,15214,20585,19822,107766,338372,93759,26429,170740,27374,17846,56198,19291,106529,353242,66653,56473,24…	Hscb,Park2,Nsd1,Zfp217,Nadk,Ppp1r3c,Suz12,Crebbp,Mterf1a,Ppard,Tars2,Vgll2,Slc1a3,Ppp1r8,Nfrkb,Barhl2,Gon4l,Pemt,Foxp2,Ctps,Eif4g2,Umps,Ilf2,Mrps10,Asxl2,Sgms1,Taf10,Xrcc5,Idi1,Crhr2,Aebp2,Coq2,Hsf2bp,Ing2,Cited2,Hdac7,Zbtb41,Rbak,Tonsl,Hoxa7,Insig1,Cmas,Tmem165,Mtr,Atp5s,Nr2c1,Uchl5,Hey2,Hltf,Rnf4,Haao,Map3k9,Sirt1,Orc5,Zfp287,Prmt5,Commd1,Heyl,Purb,Tecr,Mrpl21,Brf2,Fads2,Zfp697,Porcn,Dgat1,Pofu…
GO:1901576	organic substance biosynthetic process	1.10689e-52	-119.633	3486	1445	0.227308	6357	20933	269003,114640,64424,13982,12394,217732,22780,18028,93736,11364,217864,235028,73389,23874,242509,17355,70127,319945,15900,20088,73569,233033,72568,21951,68263,27049,94093,22278,29871,19042,269378,74434,320011,26416,665775,14423,19946,50907,76784,74450,75678,101685,14281,66172,14043,56706,12352,22130,66075,13669,22640,71330,50787,27681,231279,211986,13560,66586,66410,68184,14151,544971,68142,239099…	Sap130,Pth2,Polr1e,Esr1,Runx1,Cipc,Ikzf3,Nfib,Aff4,Acadm,Rcor1,Zfp426,Hbp1,Farsb,Bnc2,Aff1,Dpf3,Flad1,Irf8,Rps24,Vgll3,Samd4b,Lin9,Tnks,Pdhb,Etv3,Trim33,Usf1,Scmh1,Ppm1a,Ahcy,Sohlh2,Uggt1,Mapk14,Bod1l,Galnt1,Rpl30,Preb,Mtif2,Pank2,Ippk,Spty2d1,Fos,Med11,Ext2,Ccnl1,Car5a,Ttf1,Chchd3,Eif3a,Zfp1,Rcbtb1,Hs6st3,Snf8,Guf1,Tmem18,E4f1,Crls1,Mterf3,Denr,Fech,Bdp1,Ino80,Homez,Atf4,Zfp57,Cnot1,Mamstr,Mcts2…
GO:0016043	cellular component organization	1.59099e-48	-110.06	4630	1816	0.285669	6357	20933	20583,208727,21745,56412,71900,16716,16882,229317,72018,15441,70549,67451,12168,16392,235402,18198,64934,72400,27428,50505,223593,236511,54141,213556,80913,22240,230796,66164,13872,81004,15450,69605,66352,56297,69928,64074,140740,319158,22339,13559,27756,219072,11991,214899,224640,71769,107065,17257,319179,72475,227753,12912,64050,21974,109115,54725,19325,18738,233789,11658,19305,18645,68505,6773…	Snai2,Hdac4,Tep1,Noa1,Tmem106b,Ky,Lig3,Eif2a,Fundc1,Hp1bp3,Tln2,Pkp2,Bmpr2,Isl1,Lingo1,Musk,Pes1,Pinx1,Shroom3,Ercc4,Washc5,Ago1,Spag5,Plekhh2,Pum2,Dpysl3,Wdtc1,Nip7,Ercc3,Tbl1xr1,Lipc,Lnpk,Blzf1,Arl6,Apitd1,Smoc2,Sec63,Hist1h4i,Vegfa,E2f5,Lsm2,Haus4,Hnrnpd,Kdm5a,Lemd2,Bbs10,Lrrtm2,Mecp2,Hist1h2be,Ssbp3,Gsn,Creb1,Yeats4,Top2b,Supt3,Cadm1,Rab10,Pitpna,Smg1,Alcam,Pex5,Pfn2,Vps51,Itgb3bp,Bloc1s2,Rbm…
GO:0034645	cellular macromolecule biosynthetic process	1.92661e-46	-105.263	2673	1137	0.178858	6357	20933	20115,228790,16598,319944,17938,26878,15223,72672,320683,12388,58180,56449,211253,382639,14852,269252,13682,68916,17979,53374,52679,232430,243833,235534,67500,56531,56228,225651,17158,57908,57170,99929,66882,70560,76246,16865,69163,68770,53618,21380,26992,20602,106344,21885,68705,22160,16597,117599,230674,108098,17187,238673,216274,17122,21350,66795,22758,71777,75847,22687,53621,20823,74781,21408…	Rps7,Asxl1,Klf2,Taf2,Naca,B3galt2,Foxj1,Zfp518a,Zfp629,Ctnnd1,Hic2,Ybx3,Mtrf1,Zbtb42,Gspt1,Gtf3c4,Eif4a2,Cdkal1,Ncoa3,Chst3,E2f7,Crebl2,Zfp128,Pxylp1,Ccar1,Ylpm1,Ube2j1,Mppe1,Man2a1,Zfp318,Dolpp1,Tiparp,Bzw1,Wars2,Rtf1,Eif2d,Mrpl44,Phtf2,Fut8,Tbx1,Brd7,Ncor2,Rfc4,Tle1,Gtf2f2,Twist1,Klf12,Helb,Kdm4a,Med21,Max,Zfp367,Cep290,Mxd4,Tal2,Atg10,Zscan12,Ing3,Ispd,Zpr1,Cnot4,Ssb,Wipi2,Zfp354a,Zbtb18,Litaf…
GO:0051171	regulation of nitrogen compound metabolic process	4.24871e-46	-104.472	3824	1534	0.241309	6357	20933	26896,56771,22200,387201,338359,24127,12952,17933,77683,433702,13684,18628,244713,18676,100683,76804,27370,15273,15437,225872,235623,230861,110616,224826,73668,217946,18763,22632,18933,13614,66042,54343,59036,60530,109151,668501,22350,170765,14362,21415,12042,433759,228980,22218,102060,22642,66596,107435,98415,66970,11792,14359,72504,13667,66310,223701,22779,60344,225027,17190,12419,74044,13645,2…	Med14,Med20,Uba3,Mir205,Supv3l1,Xrn1,Cry1,Myt1l,Ehmt1,Ncbp1,Eif4e,Per3,Zfp317,Phf2,Trrap,Kdm4c,Rps26,Hivep2,Hoxd8,Npas4,Scap,Eif4g3,Atxn3,Ubr2,Ttc21b,Cdca7l,Pkd1,Yy1,Prrx1,Edn1,Sostdc1,Atf7ip,Dact1,Fignl1,Chd9,Zfp507,Ezr,Ripply3,Fzd1,Tcf7l1,Bcl10,Hdac1,Taf4,Sumo1,Gadd45gip1,Zbtb17,Gtf3a,Hat1,Nucks1,Ssbp2,Apex1,Fxr1,Taf4b,Eif2b4,Dpy30,Mkl1,Ikzf2,Fign,Srsf7,Mbd1,Cbx5,Ttf2,Egf,Csde1,Barx2,Prdx3,Nmd3…
GO:0009059	macromolecule biosynthetic process	6.1378e-46	-104.104	2701	1145	0.180116	6357	20933	218772,75273,20014,381760,13649,21376,235041,104625,73158,66999,195522,54422,67733,207958,19016,72459,71148,69527,15213,227644,224045,66258,11908,15278,22775,230700,319195,94061,12916,69090,18291,67230,98053,69228,58250,22661,71567,195733,208211,272158,67281,269400,228869,270096,269585,80292,12168,107895,353187,72400,20788,20583,208727,56412,21745,229317,16882,330301,241322,108148,320267,75452,13…	Rarb,Pelp1,Rpn2,Ssbp1,Egfr,Tbrg1,Kank2,Cnot6,Larp1,Med28,Zfp691,Barhl1,Itgb3bp,Alg11,Pparg,Htatsf1,Mier1,Mrps9,Hey1,Snapc4,Eif2b5,Mrps17,Atf1,Tfb2m,Zik1,Foxj3,Rpl17,Mrpl1,Crem,Ascc1,Nobox,Zfp329,Gtf2f1,Zfp746,Chst11,Zfp148,Mcm9,Grhl1,Alg1,Poln,Rpl37,Rtel1,Ncoa5,Mon1b,Zscan20,Zxdc,Bmpr2,Mgat5,Nr1d2,Pinx1,Srebf2,Snai2,Hdac4,Noa1,Tep1,Eif2a,Lig3,Zfp786,Zbtb6,Galnt2,Fubp3,Ascc2,E2f5,Rprd1b,Scai,Kdm5a…
GO:0006996	organelle organization	1.20118e-45	-103.433	2425	1046	0.164543	6357	20933	70120,57748,18457,20479,268281,52864,67979,19357,114642,12385,208846,12757,54324,27494,225929,52563,215708,319675,107732,22110,67025,12954,22004,56418,338349,19298,67952,67052,12649,225215,56398,217325,19345,170826,329165,69178,74470,19063,381921,97122,59008,66541,75686,67767,27367,13424,98496,226422,74778,103967,11977,16551,94190,58230,22239,18541,20239,327762,76366,15182,73582,229722,56327,5639…	Yars2,Jmy,Bloc1s6,Vps4b,Shprh,Slx4,Atad1,Rad21,Brdt,Ctnna1,Daam1,Clta,Arhgef5,Amot,Patl1,Cdc23,Miga1,Cep295,Mrpl10,Tspyl1,Rpl11,Cryaa,Tpm2,Ykt6,Cntln,Pex19,Tomm20,Ndc80,Chek1,Rsl24d1,Chp1,Llgl2,Rab5c,Ppargc1b,Abi2,Snx5,Cep72,Ppt1,Taok2,Hist2h4,Anapc5,Immp1l,Nudt16,Jagn1,Rpl3,Dync1h1,Pid1,Rab29,Rrp7a,Dnm3,Atp7a,Kif11,Ophn1,Rnf8,Ugt8a,Pcnt,Atxn2,Dna2,Mtif3,Hdac2,Camkmt,5330417C22Rik,Arl2,Akap8,Mica…
GO:0019219	regulation of nucleobase-containing compound metabolic process	8.39877e-45	-101.488	3541	1432	0.225263	6357	20933	213464,15505,14708,19891,233904,14050,12395,68016,18648,18142,22629,26443,18761,57432,104349,22083,66549,18986,71952,235469,338523,14370,51813,22697,70380,54367,74112,73230,22722,231440,78893,17342,77578,17847,15904,630579,78903,229512,14013,319955,101214,233410,60411,229906,22764,93760,99890,56456,20384,330502,15289,19255,226442,213054,20354,170791,408062,17700,19885,108686,56012,20847,94091,264…	Rbbp5,Hsph1,Gng7,Rpa2,Setd1a,Eya3,Runx1t1,Murc,Pgam1,Npas1,Ywhah,Psma6,Prkcq,Zc3h8,Zfp119a,Ctr9,Aggf1,Pou2f1,2410016O06Rik,Zfp280d,Kdm7a,Fzd8,Ccnc,Zscan21,Mospd1,Zfp326,Usp16,Bmper,Zfp64,Parm1,Cnot10,Mitf,Bcl9,Usp34,Id4,Zfp808,Wrnip1,Smg5,Mecom,Ercc6,Tra2a,Zfp592,Cenpk,Gtf2b,Zfx,Arid1a,Prmt6,Actl6a,Srsf5,Zfp82,Hmgb1,Ptpn2,Zfp281,Gabpb2,Sema4d,Rbm39,Zfp873,Mstn,Rorc,Ccdc88a,Pgam2,Stat2,Trim11,Map3…
GO:0009987	cellular process	5.55221e-44	-99.5995	13777	4617	0.726286	6357	20933	20630,21843,53412,192185,50873,70285,50527,68922,22247,16329,56274,66663,17059,20512,229285,225028,67664,109359,17684,74377,71883,13885,242083,67895,67781,14682,67328,18572,76178,210106,72825,103768,13854,258153,21813,320717,320165,57782,70430,16328,17846,70699,56363,20585,19822,236930,240442,76757,68550,57376,208638,234847,231672,208258,13350,54138,17765,13728,239833,64658,21425,17311,73130,6395…	Snrpc,Tial1,Ppp1r3c,Nadk,Park2,Rpf1,Ero1l,Dnaic1,Umps,Inpp1,Stk3,Uba5,Klrb1c,Slc1a3,Spg20,Map4k3,Rnf125,Fam175b,Cited2,Hsf2bp,Coq2,Esd,Ppm1l,Ppa1,Ilf2,Gnaq,Lyzl1,Pdcd11,Coa5,Papd7,Mon1a,Tubg2,Epn1,Olfr412,Tgfbr2,Pptc7,Tacc1,Rbak,Tbce,Cep250,Commd1,Nup205,Tmeff2,Hltf,Rnf4,Ercc6l,Adnp2,Trdn,Tefm,Smarce1,Slc25a38,Spg7,Fbxw8,Ankrd33,Dgat1,Atxn10,Mtf2,Mark2,Lmln,Mrps25,Tfeb,Kitl,Tmed5,Dusp10,Gpd1l,Pkp…
GO:0043412	macromolecule modification	5.79755e-44	-99.5563	2417	1037	0.163127	6357	20933	68497,50933,67772,229776,67444,50523,67345,73469,27103,226791,102193,12234,28077,15258,68867,69790,242557,110355,217718,216395,107986,13434,13841,103963,19267,21929,72102,18777,13135,399510,217232,214669,60532,23802,16772,26564,13665,71146,77987,70892,207952,116940,244071,13837,338467,24017,68205,19877,66185,19106,27273,232313,22215,435391,266632,17928,66897,18452,66505,71954,75467,50932,54613,10…	Arel1,Uchl3,Chd8,Cdc14a,Ilkap,Lats2,Herc4,Rnf38,Eif2ak4,Lyplal1,Zdhhc7,Btrc,Med10,Hipk2,Rnf122,Med30,Atg4c,Grk2,Nek9,Tmem5,Ddb2,Trdmt1,Epha7,Rpn1,Ptpre,Tnfaip3,Dusp11,Lypla1,Dad1,Map4k5,Cdc27,L3mbtl2,Wtap,Amfr,Lama1,Ror2,Eif2s1,Golga7b,Ascc3,Ttll7,Klhl25,Tgs1,Agbl1,Epha3,Morc3,Rnf13,Urm1,Rock1,1110037F02Rik,Eif2ak2,Pdk4,Gxylt2,Ube3a,Dupd1,Irak4,Myog,Naa16,P4ha2,Zmynd11,Suds3,Stpg4,Mink1,St3gal6,M…
GO:0031323	regulation of cellular metabolic process	7.44319e-43	-97.0039	5246	1993	0.313513	6357	20933	22185,109113,60611,18230,214444,59079,214498,67923,223453,109700,21812,52830,15423,269704,15468,68833,100072,17864,12611,213541,66317,170823,22411,18218,56222,319476,108000,69125,72068,21761,77605,12190,26419,232334,224585,70601,17420,18519,66131,26380,16337,14751,71991,50790,56220,242466,12447,268859,75901,18148,114565,21987,108961,103836,244694,19090,319974,20595,223773,107934,319757,238803,661…	U2af2,Uhrf2,Foxj2,Nxn,Cdk5rap2,Erbin,Cdc73,Eloc,Dap,Itga1,Tgfbr1,Pnrc2,Hoxc4,Zfp664,Prmt2,Pdcl3,Camta1,Mybl1,Cebpg,Ythdf2,Wdr61,Glmn,Wnt11,Dusp8,Cited4,Lrtm1,Cenpf,Cnot8,Cnot2,Morf4l1,H2afv,Brca2,Mapk8,Vgll4,Zfp160,Ecd,Mnat1,Kat2b,Tipin,Esrrb,Insr,Gpi1,Ercc8,Acsl4,Zfp386,Zfp462,Ccne1,Rbfox1,Dcp1a,Npm1,Zbtb21,Tpd52l1,E2f8,Zfp692,Kdm4d,Prkdc,Auts2,Smn1,Zbed4,Celsr3,Smo,Zfp366,Tmem14c,Mina,Trip4,Pkn…
GO:0080090	regulation of primary metabolic process	6.27065e-42	-94.8727	5199	1973	0.310367	6357	20933	56456,330502,20384,15289,19255,170459,226442,20333,20354,213054,12531,170791,408062,17700,78688,19885,23806,56012,108686,20847,106052,26405,19046,94091,57257,20637,15407,23942,22225,65100,77110,21841,26374,93686,93834,71701,101490,94223,54394,67869,56784,105278,17691,54194,11819,18605,15357,12301,434377,209012,20375,50996,14466,69241,17436,320209,244721,14083,80748,14428,21339,56428,19302,15505,2…	Actl6a,Zfp82,Srsf5,Hmgb1,Ptpn2,Stard4,Zfp281,Sec22b,Sema4d,Gabpb2,Cdc25b,Rbm39,Zfp873,Mstn,Nol3,Rorc,Arih1,Pgam2,Ccdc88a,Stat2,Fbxo4,Map3k2,Ppp1cb,Trim11,Vav3,Snrnp70,Hoxb1,Mta2,Usp5,Zic5,Gpbp1l1,Tia1,Rfwd2,Rbfox2,Peli2,Pnpt1,Inpp5f,Dgcr8,Crlf3,Paip2,Ralgapa1,Cdk20,Sik1,Akap8l,Nr2f2,Enpp1,Hmgcr,Cacybp,Zfp560,Ulk4,Spi1,Pdcd7,Gba,Polr2d,Me1,Ddx11,Zfp846,Ptk2,BC004004,Galr2,Taf1a,Mtch2,Pex2,Hsph1,Rb…
GO:2000112	regulation of cellular macromolecule biosynthetic process	9.33472e-42	-94.4748	3471	1395	0.219443	6357	20933	19720,18760,244879,56314,56296,20679,102466836,13433,20024,19017,192191,14461,380912,29808,56736,235320,18740,73247,70208,56541,22690,69237,231151,56417,98403,93697,56399,320817,20821,12572,320878,23808,66083,66399,233833,75593,19687,77035,628308,15402,12785,19252,232791,16396,21853,26409,16210,13813,109333,51810,21847,16476,269997,12675,69635,223513,353170,74019,69956,66929,19164,21399,24116,226…	Trim27,Prkd1,Npat,Zfp113,Dmrtb1,Sox6,Mir7578,Dnmt1,Sub1,Ppargc1a,Med9,Gata2,Zfp395,Mga,Rnf14,Zbtb16,Pitx1,Mrgbp,Med23,Habp4,Zfp28,Gtpbp4,Tada2b,Adar,Zfp451,Ice2,Akap8,Atad2b,Trim21,Cdk7,Mical2,Ash2l,Setd6,Tsfm,Tnrc6a,Malsu1,Rfc1,Kdm8,Zfp970,Hoxa5,Cnbp,Dusp1,Cnot3,Itch,Timeless,Map3k7,Impact,Eomes,Pkn2,Hnrnpu,Klf10,Jun,Zfp747,Chuk,Dapk1,Abra,Txlng,Traf3ip1,Ptcd3,Asf1b,Psen1,Tcea1,Nelfa,Zfp13,Nfatc…
GO:0044271	cellular nitrogen compound biosynthetic process	2.01888e-41	-93.7034	2577	1084	0.170521	6357	20933	17692,14923,230908,226747,75079,27053,66993,353172,69821,17258,74238,56284,68877,378435,218865,140858,12013,13666,70088,16909,71514,234219,52463,20922,68750,20688,192285,67941,30927,69743,319594,22720,66475,108829,12014,12909,14651,105787,67204,320790,28084,58172,13018,54713,244141,27393,192657,13992,67980,81630,170442,228536,70354,18949,12454,216134,19016,54422,195522,67733,66999,104625,73158,19…	Msl3,Guk1,Tardbp,Ahctf1,Zbtb49,Asns,Smarcd3,Gars,Mterf4,Mef2a,Mterf2,Mrpl19,Maf1,Mafa,Chdh,Wdr5,Bach1,Eif2ak3,Meaf6,Lmo2,Sfpq,Helt,Tet1,Supt4a,Rreb1,Sp4,Phf21a,Rps27l,Snai3,Casz1,Hif1an,Zfp62,Rps23,Jmjd1c,Bach2,Crcp,Hagh,Prkaa1,Eif2s2,Chd7,Vps25,Sertad2,Ctcf,Fezf2,Nars2,Mrpl39,Ell2,Khdrbs3,Gnpda2,Zbtb22,Bbox1,Bahd1,Secisbp2l,Pnn,Ccnk,Pdxk,Pparg,Barhl1,Zfp691,Itgb3bp,Med28,Cnot6,Larp1,Pts,Egfr,Kan…
GO:0051252	regulation of RNA metabolic process	2.99667e-40	-91.0059	3198	1295	0.203712	6357	20933	12166,70160,668923,13380,15401,74256,67367,20963,330361,15254,67655,233060,11797,72754,225160,66660,170936,329659,11863,329679,20901,74322,27878,72416,264064,72567,21420,26395,211151,68927,22630,18712,474156,105590,81879,12566,52915,219158,11416,16973,217031,22385,66118,22026,231386,18046,66213,654801,66266,20815,94112,68975,67245,13405,18741,28000,11787,18109,26465,20588,14056,30046,108960,38205…	Bmpr1a,Vps36,Zfp442,Dkk1,Hoxa4,Cyld,Paxbp1,Syk,Gcfc2,Hint1,Ctdp1,Zfp382,Birc2,Arhgef10l,Thoc1,Sltm,Zfp369,E130311K13Rik,Arnt,Fnip2,Strap,Cxxc1,Tada1,Lrpprc,Cdk8,Bclaf1,Tfap2c,Map2k1,Churc1,Ptcd2,Ywhaq,Pim1,Zbtb9,Zfp957,Tfcp2l1,Cdk2,Zmiz2,Ccar2,Slc33a1,Lrp5,Tada2a,Baz1b,Sarnp,Nr2c2,Ythdc1,Nfyc,Med7,Zfp784,Eapp,Srpk1,Med15,Med27,Peli1,Dmd,Pitx2,Prpf19,Apbb2,Mycn,Zfp146,Smarcc1,Ezh2,Zfp292,Irak2,Crt…
GO:0006396	RNA processing	3.37414e-39	-88.5847	692	373	0.0586755	6357	20933	68916,72662,232314,54367,52897,66637,56215,18139,53861,67239,27366,69499,69606,101214,66603,72544,20115,69163,72290,98956,78581,108943,69237,56417,103135,12457,67487,217995,59014,22380,67242,101861,66549,72085,74157,225432,51810,66441,328110,108013,105372,207615,54194,193116,117599,140546,67148,66583,28088,65961,57905,108673,14007,59013,50912,69241,20492,54633,20643,76167,67619,78688,170791,56758…	Cdkal1,Dis3,Ppp4r2,Zfp326,Rbfox3,Tsen15,Acin1,Zfp638,Zranb2,Rpf2,Txnl4a,Tsr2,Mtfmt,Tra2a,Gemin2,Exosc6,Rps7,Mrpl44,Lsm11,Nat10,Utp23,Trmt10a,Gtpbp4,Adar,Pan2,Noct,Dhx40,Heatr1,Rrs1,Wbp4,Gemin6,Ints4,Aggf1,Osgepl1,Cmtr1,Rbm27,Hnrnpu,Magohb,Prpf39,Celf4,Utp15,Wdr37,Akap8l,Slu7,Helb,Eri3,Fam103a1,Exosc1,Rtcb,Utp3,Isy1,Ccdc86,Celf2,Hnrnph1,Exosc10,Polr2d,Slbp,Pqbp1,Snrpe,Snrnp35,Nob1,Nol3,Rbm39,Mbnl1…
GO:0036211	protein modification process	3.48207e-39	-88.5532	2175	933	0.146767	6357	20933	224440,70097,66840,80751,77853,226830,245269,58231,71458,12532,55994,66743,545622,21951,67988,99382,17131,269003,12955,72149,381022,228019,217864,11308,320011,68366,26416,14423,228662,224023,66268,66172,76867,268697,26390,22022,94093,11303,17776,56504,59007,271981,223435,71101,83560,19042,83962,69219,67118,14538,78787,331623,56031,54196,100763,57295,75965,12530,217410,11532,224170,109263,224014,5…	Setd4,Sash1,Wdr45b,Rnf34,Msl2,Smyd2,Nim1k,Stk4,Bcor,Cdc25c,Smad9,Rnf220,Ptpn3,Tnks,Tmx3,Abtb2,Smad7,Sap130,Cryab,Strada,Kmt2d,Mettl8,Rcor1,Abi1,Uggt1,Tmem129,Mapk14,Galnt1,Btbd3,Klhl22,Pigyl,Med11,Rhbdd1,Ccnb1,Mapkbp1,Tpst2,Trim33,Abca1,Mast2,Srpk3,Ngly1,Tbck,Trio,Uvssa,Tex14,Ppm1a,Btbd1,Ddah1,Bfar,Gcnt2,Usp54,Bend3,Ppie,Pabpn1,Ube3c,Icmt,Zdhhc20,Cdc25a,Trib2,Adh5,Dzip3,Rlf,Fgd4,Tyk2,Naa10,Trim32…
GO:0006464	cellular protein modification process	3.48207e-39	-88.5532	2175	933	0.146767	6357	20933	14423,26416,68366,320011,268697,76867,66172,66268,224023,228662,271981,59007,56504,11303,17776,94093,22022,26390,331623,78787,14538,67118,69219,83962,19042,71101,83560,223435,66743,55994,12532,71458,58231,245269,226830,77853,80751,66840,70097,224440,17131,99382,67988,21951,545622,269003,12955,11308,217864,228019,381022,72149,225055,235323,170930,68961,217558,104263,19258,231050,102162,15257,22609…	Galnt1,Mapk14,Tmem129,Uggt1,Ccnb1,Rhbdd1,Med11,Pigyl,Klhl22,Btbd3,Tbck,Ngly1,Srpk3,Abca1,Mast2,Trim33,Tpst2,Mapkbp1,Bend3,Usp54,Gcnt2,Bfar,Ddah1,Btbd1,Ppm1a,Uvssa,Tex14,Trio,Rnf220,Smad9,Cdc25c,Bcor,Stk4,Nim1k,Smyd2,Msl2,Rnf34,Wdr45b,Sash1,Setd4,Smad7,Abtb2,Tmx3,Tnks,Ptpn3,Sap130,Cryab,Abi1,Rcor1,Mettl8,Kmt2d,Strada,Fbxo11,Usp28,Sumo2,Phkg2,G2e3,Kdm3a,Ptpn4,Galnt11,Taf5l,Hipk1,Hectd2,Csnk1g1,Map3…
GO:0019538	protein metabolic process	4.26595e-39	-88.3502	3198	1290	0.202926	6357	20933	54196,100763,56031,75965,12530,54721,109263,20615,17463,15185,26889,68028,59025,68031,50708,56791,107869,14694,328234,319953,12283,232232,56347,225055,320806,14084,68961,26408,226098,27395,104263,11502,108159,102162,19821,545156,75398,224897,68440,103136,64384,22367,20586,17308,216080,23938,26895,74996,69585,224440,55994,245269,58231,71458,226830,77853,55987,27267,66840,18624,545622,381293,17131,…	Pabpn1,Ube3c,Ppie,Zdhhc20,Cdc25a,Tyk2,Rlf,Snapin,Psmd7,Hdac6,Cln8,Rpl22l1,Usp14,Rnf146,Hist1h1c,Ube2l6,Cth,Rack1,Rnf182,Ttll1,Cab39,Hdac11,Eif3c,Fbxo11,Gfm2,Faf1,Phkg2,Map3k5,Hectd2,Mrpl15,Kdm3a,Adam9,Ubxn8,Taf5l,Rnf2,Kalrn,Mrpl32,Dpp9,Dusp23,Pwp1,Sirt3,Vrk1,Smarca4,Mgat1,Ube2d1,Map2k5,Cops7b,Usp47,Hfe2,Setd4,Smad9,Nim1k,Stk4,Bcor,Smyd2,Msl2,Cpxm2,Cars,Wdr45b,Pepd,Ptpn3,Kif14,Smad7,Dpp3,Secisbp2,…
GO:0010556	regulation of macromolecule biosynthetic process	5.54428e-39	-88.0881	3572	1417	0.222904	6357	20933	214580,229599,268297,72836,14375,20103,20683,56612,233545,620419,213988,58988,74195,18983,13876,12593,17246,23863,56458,230738,211323,57321,21384,12985,71591,66197,232023,20184,50754,105689,21807,67222,19651,330959,74370,110157,80859,14489,15574,26399,18020,75841,17341,19704,14051,30937,12455,223922,67916,14131,14634,13549,13636,18139,328365,223870,72508,30923,68015,73178,240120,16870,15161,17354…	Pstk,Ciart,Scml4,Pot1b,Xrcc6,Rps5,Sp1,Pfdn5,Emsy,Zfp963,Tnrc6b,Rps6kb2,Elp3,Cnot7,Erg,Cdyl,Mdm2,Dand5,Foxo1,Zc3h12a,Nrg1,Terf2ip,Tbx15,Csf3,Zfp251,Cks2,Vopp1,Uimc1,Fbxw7,Mycbp2,Tsc22d1,Srfbp1,Rbl2,Snapc5,Rptor,Raf1,Nfkbiz,Mtpn,Hus1,Map2k6,Nfatc2ip,Rnf139,Bhlha15,Upf1,Eya4,Lmcd1,Ccnt1,Atf7,Plpp3,Fcgr3,Gli3,Dyrk1b,Efna1,Zfp638,Zmiz1,Senp1,Rps6kb1,Foxe3,Trap1,Wasl,Zfp119b,Lhx2,Hcfc1,Mllt10,Sgf29,Ift…
GO:0019222	regulation of metabolic process	4.78801e-37	-83.6295	5658	2097	0.329873	6357	20933	103583,56805,51886,78783,74427,213389,52033,55982,433693,226169,70891,105782,24015,67563,12161,19826,28019,74007,66887,244059,217069,17764,226407,67738,238722,18789,72692,66362,108075,51869,56291,227331,20230,17931,13014,13132,17295,30946,14245,66200,77037,23872,11428,140488,13804,16468,73473,24068,170767,18027,27224,11727,23894,71702,69020,12921,234729,69642,17132,14991,17127,270627,229709,81702…	Fbxw11,Zbtb33,Fubp1,Brpf1,Eaf1,Prdm9,Pbk,Paxip1,Akirin2,Pprc1,Spdya,Scrib,Abce1,Narfl,Bmp6,Rnps1,Ing4,Btbd11,Lonp2,Chd2,Trim25,Mtf1,Rab3gap1,Ppid,Zfp72,Papola,Hnrnpll,Exosc3,Ltbp4,Rif1,Styx,Gigyf2,Satb1,Ppp1r12a,Cstb,Dab2,Met,Abt1,Lpin1,Commd6,Mrap,Ets2,Aco1,Igf2bp3,Endog,Jarid2,Iws1,Sra1,Rfxap,Nfia,Eloa,Ang,Gtf2h2,Cdc5l,Zfp707,Crhr1,Vac14,Mlip,Maf,H2-M3,Smad3,Taf1,Ahcyl1,Ankrd17,Trmt10c,Zscan2,C…
GO:0060255	regulation of macromolecule metabolic process	5.78321e-37	-83.4407	5302	1981	0.311625	6357	20933	68943,664883,72459,71148,14775,19062,15213,227644,11908,224045,69482,15278,22775,230700,78757,53945,76108,69090,12916,18291,67230,98053,69228,17920,64930,22661,195733,56700,269400,723922,408068,218772,75273,98878,72774,14225,13010,108705,17993,13649,72514,235041,104625,26914,74133,19735,109115,66999,16650,18645,54422,195522,14813,107607,67733,17876,66810,73689,381126,19016,75452,112415,13559,7047…	Pink1,Nova1,Htatsf1,Mier1,Gpx1,Inpp5k,Hey1,Snapc4,Atf1,Eif2b5,Nup35,Tfb2m,Zik1,Foxj3,Rictor,Slc40a1,Rap2a,Ascc1,Crem,Nobox,Zfp329,Gtf2f1,Zfp746,Myo6,Tsc1,Zfp148,Grhl1,Glmp,Rtel1,Mir466,Zfp738,Rarb,Pelp1,Ehd4,Neil1,Fkbp1a,Cst3,Pttg1ip,Ndufs4,Egfr,Fgfbp3,Kank2,Cnot6,H2afy,Smg8,Rgs2,Supt3,Med28,Kpna6,Pfn2,Barhl1,Zfp691,Grin2c,Nod1,Itgb3bp,Myef2,Rbm22,Bloc1s2,Garem1,Pparg,Ascc2,Zfp607b,E2f5,Rprd1b,Ve…
GO:0006355	regulation of transcription, DNA-templated	2.30587e-36	-82.0576	3064	1232	0.193802	6357	20933	192285,23892,52463,68750,20922,18484,20688,22788,15212,236732,71514,217827,234219,67154,22359,28036,16909,17240,12013,13666,70088,378435,140858,192656,68877,74238,229700,69821,17258,66993,75079,230908,226747,17692,19184,66597,12454,18949,228536,65960,81630,208146,77117,11516,387244,192657,73739,69726,13992,13018,54713,28084,58172,68729,105787,30939,20656,237911,320790,68799,12014,108829,225743,93…	Phf21a,Grem1,Tet1,Rreb1,Supt4a,Pam,Sp4,Zp3,Hexb,Rbm10,Sfpq,Nrde2,Helt,Mtdh,Vldlr,Larp7,Lmo2,Mdfi,Bach1,Eif2ak3,Meaf6,Mafa,Wdr5,Ripk2,Maf1,Mterf2,Rbm15,Mterf4,Mef2a,Smarcd3,Zbtb49,Tardbp,Ahctf1,Msl3,Psmc5,Trim13,Ccnk,Pnn,Bahd1,Twsg1,Zbtb22,Yeats2,Zfp934,Adcyap1,Mirlet7a-1,Ell2,Cby1,Smyd3,Khdrbs3,Ctcf,Fezf2,Vps25,Sertad2,Trim37,Prkaa1,Pttg1,Sod2,Brip1,Chd7,Rgmb,Bach2,Jmjd1c,Rnf165,Rnf111,Hif1an,Zfp…
GO:0031326	regulation of cellular biosynthetic process	7.52164e-36	-80.8753	3740	1459	0.229511	6357	20933	17200,57810,235459,13435,72057,54723,319168,66855,16963,226144,19356,240354,21898,67370,218490,14479,67025,24135,56309,93765,72020,239652,69159,78912,19357,66233,67888,99480,66645,114642,225283,17248,433375,22709,57748,235497,15354,17300,54324,20587,24128,22433,11481,225929,27223,109331,231866,387609,13626,16341,71876,75627,81000,98496,321006,210105,70207,15500,19223,54446,50911,15182,106931,3533…	Mc2r,Cdon,Gtf2a2,Dnmt3a,Phf10,Tfip11,Hist1h2ah,Tcf25,Xcl1,Erlin1,Rad17,Malt1,Tlr4,Zfp606,Btf3,Usp15,Rpl11,Zfp68,Mycbp,Ube2n,Zfp654,Zfp641,Rhebl1,Sp2,Rad21,Dmap1,Tmem100,Dnttip2,Pspc1,Brdt,Rprd1a,Mdm4,Creg1,Zfp51,Jmy,Leo1,Hmgb3,Foxc1,Arhgef5,Smarcb1,Xrn2,Xbp1,Acvr2b,Patl1,Trp53bp1,Rnf20,Zfp12,Zhx2,Eed,Eif3e,Cenpu,Snapc1,Rad54l2,Pid1,Vprbp,Zfp719,Taco1,Hsf2,Ptgis,Nfat5,Exosc9,Hdac2,Kctd1,Zfp703,Sko…
GO:1903506	regulation of nucleic acid-templated transcription	8.14492e-36	-80.7957	3077	1234	0.194117	6357	20933	408068,218772,75273,13649,235041,104625,26914,109115,66999,16650,54422,195522,67733,107607,17876,73689,19016,68943,72459,71148,19062,15213,227644,11908,69482,15278,22775,53945,230700,12916,69090,18291,67230,98053,69228,17920,22661,195733,56700,228869,269585,667962,80292,12168,16392,72607,353187,18198,52626,20788,80707,20583,208727,22746,229317,330301,241322,15441,320267,75452,112415,13559,22339,7…	Zfp738,Rarb,Pelp1,Egfr,Kank2,Cnot6,H2afy,Supt3,Med28,Kpna6,Barhl1,Zfp691,Itgb3bp,Nod1,Myef2,Bloc1s2,Pparg,Pink1,Htatsf1,Mier1,Inpp5k,Hey1,Snapc4,Atf1,Nup35,Tfb2m,Zik1,Slc40a1,Foxj3,Crem,Ascc1,Nobox,Zfp329,Gtf2f1,Zfp746,Myo6,Zfp148,Grhl1,Glmp,Ncoa5,Zscan20,Zfp966,Zxdc,Bmpr2,Isl1,Usp13,Nr1d2,Musk,Cdkn2aipnl,Srebf2,Wwox,Snai2,Hdac4,Zfp85,Eif2a,Zfp786,Zbtb6,Hp1bp3,Fubp3,Ascc2,Zfp607b,E2f5,Vegfa,Rprd1…
GO:0009889	regulation of biosynthetic process	9.43586e-36	-80.6485	3798	1478	0.2325	6357	20933	26395,21420,13492,211151,72416,27878,74322,264064,72567,52915,219158,81879,12566,16973,11416,14186,105590,18712,474156,12461,22630,330361,20963,67367,74256,15254,12465,668923,70160,12166,15401,13380,170936,58246,329659,66660,20901,269224,329679,11863,211006,67655,233060,66082,225160,72754,67459,11797,68153,66175,317750,23849,382056,142980,217715,17346,26465,104570,108960,14056,30046,20588,70925,2…	Map2k1,Tfap2c,Drd5,Churc1,Lrpprc,Tada1,Cxxc1,Cdk8,Bclaf1,Zmiz2,Ccar2,Tfcp2l1,Cdk2,Lrp5,Slc33a1,Fgfr4,Zfp957,Pim1,Zbtb9,Cct2,Ywhaq,Gcfc2,Syk,Paxbp1,Cyld,Hint1,Cct5,Zfp442,Vps36,Bmpr1a,Hoxa4,Dkk1,Zfp369,Slc35b4,E130311K13Rik,Sltm,Strap,Pask,Fnip2,Arnt,Sepsecs,Ctdp1,Zfp382,Abhd6,Thoc1,Arhgef10l,Nvl,Birc2,Gtf2e2,Mustn1,Slc24a5,Klf6,Crtc1,Tlr3,Eif2b2,Mknk1,Zfp146,Smek2,Irak2,Ezh2,Zfp292,Smarcc1,Cdkn2a…
GO:0010468	regulation of gene expression	1.36328e-35	-80.2806	3857	1497	0.235488	6357	20933	109115,19735,16650,66999,17876,67733,107607,54422,195522,19016,73689,66810,75273,218772,408068,723922,235041,13649,26914,104625,18291,67230,69090,12916,17920,64930,69228,98053,56700,195733,22661,71148,664883,72459,68943,15213,19062,14775,69482,224045,11908,227644,78757,230700,53945,22775,15278,80707,20788,22746,208727,20583,229317,320267,15441,241322,330301,667962,269585,228869,72607,16392,210529…	Supt3,Rgs2,Kpna6,Med28,Myef2,Itgb3bp,Nod1,Barhl1,Zfp691,Pparg,Bloc1s2,Rbm22,Pelp1,Rarb,Zfp738,Mir466,Kank2,Egfr,H2afy,Cnot6,Nobox,Zfp329,Ascc1,Crem,Myo6,Tsc1,Zfp746,Gtf2f1,Glmp,Grhl1,Zfp148,Mier1,Nova1,Htatsf1,Pink1,Hey1,Inpp5k,Gpx1,Nup35,Eif2b5,Atf1,Snapc4,Rictor,Foxj3,Slc40a1,Zik1,Tfb2m,Wwox,Srebf2,Zfp85,Hdac4,Snai2,Eif2a,Fubp3,Hp1bp3,Zbtb6,Zfp786,Zfp966,Zscan20,Ncoa5,Usp13,Isl1,Mettl14,Bmpr2,Z…
GO:2001141	regulation of RNA biosynthetic process	1.97671e-35	-79.909	3085	1235	0.194274	6357	20933	72162,16600,56031,17425,319965,66869,69076,208595,27056,67151,207165,232232,107869,20319,75339,22781,619289,15976,18538,15185,22648,50708,208647,219132,226182,226641,104263,102162,238693,71093,23938,20586,18294,104721,15368,74996,69585,19821,21941,52846,192170,232854,76199,65020,17131,73610,226830,232560,55994,71458,71242,67040,381022,21417,18584,54401,218850,21834,23988,68010,71834,241066,56070,…	Dhx36,Klf4,Ppie,Foxk1,Cc2d1b,Zfp869,Triap1,Mterf1b,Irf5,Psmd9,Bptf,Hdac11,Cth,Sfrp2,Mphosph8,Ikzf4,Rfx8,Ifnar2,Pcna,Hdac6,Zfp11,Hist1h1c,Creb3l2,Phf11d,Taf5,Atf6,Kdm3a,Taf5l,Zfp58,Atoh8,Map2k5,Smarca4,Ogg1,Ddx1,Hmox1,Usp47,Hfe2,Rnf2,Tnfrsf8,Cnot11,Eif4a3,Zfp418,Med13l,Zfp110,Smad7,Zfp433,Smyd2,Caprin2,Smad9,Bcor,Spata24,Ddx17,Kmt2d,Zeb1,Pde8a,Ywhab,Fam208a,Thrb,Pin1,Bambi,Zbtb43,Carf,Tcerg1,Pdcd4…
GO:0016071	mRNA metabolic process	1.54166e-31	-70.9473	469	263	0.0413717	6357	20933	107829,72193,20637,223642,22687,22184,20924,432508,14105,71701,93686,20384,69639,14300,56758,78688,76167,20643,170791,20492,54633,59013,69241,50912,14007,353190,57905,67148,193116,230738,54194,232791,117599,225432,18983,328110,66441,108013,51810,66549,74157,17350,67242,22380,103135,12457,56417,72290,19704,72544,229512,101214,66603,27366,66637,56215,53861,54367,52897,232314,72662,14852,101739,1913…	Thoc5,Scaf11,Snrnp70,Zc3h3,Zpr1,Zrsr2,Supt5,Cpsf6,Srsf10,Pnpt1,Rbfox2,Srsf5,Exosc8,Frg1,Mbnl1,Nol3,Snrnp35,Snrpe,Rbm39,Slbp,Pqbp1,Hnrnph1,Polr2d,Exosc10,Celf2,Edc3,Isy1,Fam103a1,Slu7,Zc3h12a,Akap8l,Cnot3,Helb,Rbm27,Cnot7,Prpf39,Magohb,Celf4,Hnrnpu,Aggf1,Cmtr1,Mlh1,Gemin6,Wbp4,Pan2,Noct,Adar,Lsm11,Upf1,Exosc6,Smg5,Tra2a,Gemin2,Txnl4a,Tsen15,Acin1,Zranb2,Zfp326,Rbfox3,Ppp4r2,Dis3,Gspt1,Psip1,Prpf4b…
GO:0033036	macromolecule localization	3.12177e-31	-70.2417	1941	819	0.128834	6357	20933	19684,218441,30058,70549,22218,231474,268566,67338,55989,114896,65246,64934,18198,223593,22350,66111,72400,52028,19273,18763,22632,22631,67451,110616,73668,24044,74254,11554,140740,77619,20851,78808,66352,56297,13872,15450,433702,54141,26422,12952,100855,101994,227753,20524,17257,18195,104831,11818,107305,11865,66810,19016,223527,72421,50797,19305,14813,68080,68505,70827,19325,68328,18738,16650,1…	Rdx,Zfyve16,Timm8a1,Tln2,Sumo1,Paqr3,Gphn,Rffl,Nop58,Afg3l1,Xpo7,Pes1,Musk,Washc5,Ezr,Tmed3,Pinx1,Bbs1,Ptpru,Pkd1,Yy1,Ywhaz,Pkp2,Atxn3,Ttc21b,Scamp2,Gpn1,Adrb1,Sec63,Prelid2,Stat5b,Stxbp5,Blzf1,Arl6,Ercc3,Lipc,Ncbp1,Spag5,Nbea,Cry1,Tbc1d14,Champ1,Gsn,Slc25a17,Mecp2,Nsf,Ptpn23,Apoh,Vps37c,Arntl,Rbm22,Pparg,Eny2,Ttc30b,Copb2,Pex5,Grin2c,Gpn3,Vps51,Trak2,Rab10,Rab13,Pitpna,Kpna6,Plscr5,Os9,Plekhf2,G…
GO:0051641	cellular localization	1.96667e-30	-68.4012	1692	727	0.114362	6357	20933	17755,105513,59040,70699,12190,16328,54610,240756,22088,100042165,234847,319924,76757,15251,17101,75901,216344,53334,13185,28015,231999,18148,239839,381605,12330,71844,12558,195236,214444,108800,67669,76742,12512,17957,59079,109552,53421,12121,71116,55943,66384,78232,22411,22418,244329,67229,20975,103573,24067,66212,21749,69597,108000,76378,50771,67016,76779,72938,11938,68653,231834,50527,108011,…	Map1b,Chmp7,Rhot1,Nup205,Brca2,Cep250,Tbc1d8,Klhl12,Tsg101,BC005561,Spg7,Apba1,Trdn,Hif1a,Lyst,Dcp1a,Rab21,Gosr1,Dscr3,Polr2m,Plekha8,Npm1,Ccdc14,Tbc1d2,Canx,Nupl1,Cdh2,Pom121l2,Cdk5rap2,Ston2,Hikeshi,Snx27,Cd63,Napb,Erbin,Sri,Sec61a1,Bicd1,Stx18,Stx8,Srp19,Trappc6b,Wnt11,Wnt5a,Mcph1,Prpf18,Synj2,Xpo1,Srp54a,Sec61b,Terf1,Afg3l2,Cenpf,Ropn1,Atp9b,Tbc1d2b,Cluap1,Hspb11,Atp2a2,Samm50,Snx8,Ero1l,Ap4e…
GO:0015031	protein transport	2.59029e-30	-68.1258	1075	500	0.0786535	6357	20933	66629,20972,231876,81500,329877,56440,19344,209478,56324,216274,70478,260302,103737,72569,30930,54644,224630,193116,238799,54598,353047,66201,223513,53375,74019,233824,75767,19302,234549,76338,20224,16476,77573,66251,271457,67841,19885,228421,83397,66790,18708,56535,270192,110157,29858,11778,11852,66884,102774,227720,71492,20333,74682,19164,99371,229593,67064,54208,269113,76899,11733,106042,67549…	Golph3,Syngr1,Lmtk2,Sil1,Dennd4c,Snx1,Rab5b,Tbc1d12,Stam2,Cep290,Mipep,Gga3,Pex12,Bbs5,Vps26a,Otud5,Bnip1,Slu7,Tnpo1,Calcrl,Plekhm1,Vta1,Abra,Mtx2,Traf3ip1,Cog7,Rab11fip1,Pex2,Heatr3,Rab2b,Sar1a,Jun,Vps33a,Arfgap3,Rab5a,Atg3,Rorc,Kif18a,Akap12,Grtp1,Pik3r1,Pex3,Rab6b,Raf1,Pmm1,Ap3s2,Rhob,Appbp2,Bbs4,Nup214,Bbs7,Sec22b,Wdr35,Psen1,Arfgef2,Golph3l,Chmp1b,Arl6ip1,Nup54,Golga1,Ank1,Prickle1,Gpr89,Lin…
GO:0045184	establishment of protein localization	3.30125e-30	-67.8833	1204	548	0.0862042	6357	20933	107939,19877,14567,226541,382864,12491,67015,69024,28006,56217,13680,17274,15277,71146,75964,74718,20336,264134,74244,21856,68942,58244,93742,218210,72124,18969,66913,68299,74330,229709,83946,67694,99889,242557,67542,15525,216810,16211,107371,11843,227800,74375,22401,66939,234678,102423,21929,70297,56291,22365,67738,226407,170762,66887,67105,228960,668212,67819,244962,13132,68428,319277,66890,700…	Pom121,Rock1,Gdi1,Klhl20,Colq,Cd36,Ccdc91,Snx15,Washc2,Mpp5,Ddx19a,Rab8a,Hk2,Golga7b,Trappc8,Snx16,Exoc4,Ttc26,Atg7,Timm44,Chmp2b,Stx6,Pard3,Nup153,Seh1l,Pola2,Kdelr2,Vps53,Dnajc14,Ahcyl1,Phip,Ift74,Arfip1,Atg4c,Cog6,Hspa4,Tom1l2,Kpnb1,Exoc6,Arf4,Rabgap1,Gcc1,Zmat3,Aagab,D230025D16Rik,Hinfp,Tnfaip3,Gcc2,Styx,Vps45,Ppid,Rab3gap1,Nup155,Lonp2,Timm21,Stx16,Efr3b,Derl1,Snx14,Dab2,Steap3,Washc4,Lman2,…
GO:0018130	heterocycle biosynthetic process	6.56201e-30	-67.1963	2198	904	0.142205	6357	20933	21384,57321,18950,77110,56749,22169,15407,20847,232023,19885,213054,170791,105689,20184,23856,19651,68646,330959,110074,21807,67222,226442,56456,330502,20384,21339,268297,229599,14375,108156,233545,20683,79464,320209,69241,11655,74195,20375,12593,13876,18983,67005,26384,11946,56458,54194,107197,11819,19714,73178,16870,235469,12827,30923,338523,18986,75565,71952,108079,66953,22171,73916,16599,2208…	Tbx15,Terf2ip,Pnp,Gpbp1l1,Dhodh,Cmpk2,Hoxb1,Stat2,Vopp1,Rorc,Gabpb2,Rbm39,Mycbp2,Uimc1,Dido1,Rbl2,Nadk2,Snapc5,Dut,Tsc22d1,Srfbp1,Zfp281,Actl6a,Zfp82,Srsf5,Taf1a,Scml4,Ciart,Xrcc6,Mthfd1,Emsy,Sp1,Lias,Ddx11,Polr2d,Alas1,Elp3,Spi1,Cdyl,Erg,Cnot7,Polr3k,Gnpda1,Atp5a1,Foxo1,Akap8l,Uqcc3,Nr2f2,Rev3l,Wasl,Lhx2,Zfp280d,Col4a2,Foxe3,Kdm7a,Pou2f1,Sgf29,2410016O06Rik,Prkaa2,Cdca7,Tyms,Ift57,Klf3,Ctr9,Eya3…
GO:0019438	aromatic compound biosynthetic process	9.7755e-30	-66.7977	2203	905	0.142363	6357	20933	68877,225160,11797,233060,211006,17258,11863,353172,69821,170936,28071,74238,66660,69085,15401,75079,67126,70160,68925,66993,14923,17692,15254,330361,67367,230908,226747,20922,68750,20688,52463,474156,192285,219158,81879,16591,16909,72567,264064,72416,234219,74322,71514,27878,378435,140858,18974,211151,70088,21420,12013,68975,320790,105787,94112,108829,12909,12014,217031,22385,56200,69743,30927,1…	Maf1,Thoc1,Birc2,Zfp382,Sepsecs,Mef2a,Arnt,Gars,Mterf4,Zfp369,Twistnb,Mterf2,Sltm,Zcchc9,Hoxa4,Zbtb49,Atp5e,Vps36,Rpap1,Smarcd3,Guk1,Msl3,Hint1,Gcfc2,Paxbp1,Tardbp,Ahctf1,Supt4a,Rreb1,Sp4,Tet1,Zbtb9,Phf21a,Ccar2,Tfcp2l1,Kl,Lmo2,Bclaf1,Cdk8,Lrpprc,Helt,Cxxc1,Sfpq,Tada1,Mafa,Wdr5,Pole2,Churc1,Meaf6,Tfap2c,Bach1,Med27,Chd7,Prkaa1,Med15,Jmjd1c,Crcp,Bach2,Tada2a,Baz1b,Ddx21,Casz1,Snai3,Nfyc,Med7,Zfp78…
GO:0051649	establishment of localization in cell	1.37085e-29	-66.4595	1188	540	0.0849457	6357	20933	53331,245866,57915,16646,60595,54161,109815,54214,67495,231580,20619,26395,77254,22630,22135,27058,20813,14296,22627,271564,27057,52696,100226,22788,67665,68938,252903,20655,12725,66624,16412,66687,70160,117197,57258,20963,214895,225160,104303,73296,74349,20167,69821,116733,11769,12652,99167,17364,20844,28084,70296,80291,170952,210789,77371,89867,77053,59021,21355,18386,66118,110058,54525,71999,2…	Stx7,Ift52,Tbc1d1,Kpna1,Actn4,Copg1,Selenos,Golga4,Tmem167b,Gak,Snap23,Map2k1,Yif1b,Ywhaq,Tgoln2,Srp9,Srp14,Frat1,Ywhae,Vps13a,Ncoa4,Zwint,Stx12,Zp3,Dctn4,Aspscr1,Ap1s3,Sod1,Clcn3,Spcs2,Itgb1,Tbc1d15,Vps36,Bloc1s4,Xpo4,Syk,Lman2l,Thoc1,Arl1,Rhobtb3,Fam160a2,Rtn2,Mterf4,Vps4a,Ap1s1,Chga,Ssx2ip,Trpm1,Stam,Vps25,Tbc1d13,Rilpl2,Prima1,Tbc1d4,Sec24a,Sec16b,Sun1,Rab2a,Tap2,Oprd1,Sarnp,Syt17,Syt7,Fbxo22…
GO:0008104	protein localization	1.5486e-29	-66.3376	1657	711	0.111845	6357	20933	74493,64933,67602,67180,76582,13383,244667,338337,71943,30056,67025,69276,26413,105835,84652,218490,66397,19298,338349,73122,17113,19400,56418,21898,101476,73683,223754,15239,70314,98732,67510,19357,106522,66449,18457,20479,11933,12385,94221,21808,116837,11481,27494,22433,107338,18441,12757,236915,68151,70572,66541,16783,56807,226422,12389,74732,67767,69940,20742,53380,27054,22239,66096,52392,179…	Tnks2,Ap3m2,Necap1,Yipf5,Ipo11,Dlg1,Disc1,Cog3,Tom1l1,Timm9,Rpl11,Sec62,Mapk1,Sgsm3,Fam126a,Btf3,Sar1b,Pex19,Cntln,Tgfbrap1,M6pr,Rapsn,Ykt6,Tlr4,Plekha1,Atg16l2,Tbc1d22a,Hgs,Rabep2,Rab3gap2,Tvp23b,Rad21,Pkdcc,Pam16,Bloc1s6,Vps4b,Atp1b3,Ctnna1,Gopc,Tgfb2,Rims1,Acvr2b,Amot,Xbp1,Gbf1,P2ry1,Clta,Arhgef9,Wls,Ipo5,Immp1l,Lamp1,Scamp5,Rab29,Cav1,Stx11,Jagn1,Exoc1,Sptbn1,Psmd10,Sec23b,Ugt8a,Lamtor4,D1Ert…
GO:1901362	organic cyclic compound biosynthetic process	3.68121e-29	-65.4717	2305	938	0.147554	6357	20933	76073,74427,213389,13017,228491,22178,320713,55982,433693,226169,217082,67772,11785,19290,239719,69790,72739,28077,17128,243931,15258,231148,56805,51886,103806,52690,225131,100978,59057,80914,244923,21888,215114,268294,110391,30946,18420,14245,18092,268903,66200,52245,78829,52712,214669,244059,17764,69456,21969,13000,70408,66671,57745,30942,20230,102423,72843,225280,12238,209361,18027,14200,43273…	Pcgf5,Eaf1,Prdm9,Ctbp2,Zfp770,Tyrp1,Mysm1,Paxip1,Akirin2,Pprc1,Hlf,Chd8,Apbb1,Pura,Mkl2,Med30,Zkscan3,Med10,Smad4,Tshz3,Hipk2,Ablim2,Zbtb33,Fubp1,Maml1,Setd3,Wac,Nfxl1,Zfp24,Uck2,Klhl31,Tle4,Hip1,Zbtb24,Qdpr,Abt1,Otp,Lpin1,Nkx2-6,Nrip1,Commd6,Commd2,Tsc22d4,Zkscan6,L3mbtl2,Chd2,Mtf1,Commd10,Top1,Csnk2a2,Polr3f,Ccnh,Zfp112,Hnf4g,Satb1,Hinfp,Prdm4,Ino80c,Commd3,Taf3,Nfia,Fhl2,Zscan26,Ang,Eloa,Gtf2h…
GO:0044763	single-organism cellular process	4.29391e-29	-65.3178	8630	2987	0.469876	6357	20933	12562,67121,13663,171167,26434,17246,13400,18983,211323,237877,13177,12300,107197,14375,13368,72899,12390,240595,237500,213988,23827,70561,79464,100042493,14854,20683,105689,72599,23856,12354,20430,22351,22409,97998,84035,12985,76976,104015,16558,317717,20597,11518,14387,67590,22169,66197,74104,14131,12455,14841,22330,170439,13636,70012,13549,11491,75914,75841,26399,15574,67469,110175,14792,72440…	Cdh5,Mastl,Ei24,Fut10,Prnd,Mdm2,Dmpk,Cnot7,Nrg1,Atad5,Eci1,Cacng2,Uqcc3,Xrcc6,Dffb,Macrod2,Cav2,Kcnv2,Tmtc3,Tnrc6b,Bpnt1,Txndc16,Lias,Ccl21b,Gss,Sp1,Mycbp2,Pdia5,Dido1,Car7,Cyfip1,Vill,Wnt10a,Deptor,Kremen1,Csf3,Arxes2,Synj1,Kif16b,Sec22a,Smpd1,Add1,Gaa,Tctn3,Cmpk2,Cks2,Abcb6,Fcgr3,Ccnt1,Gsg2,Vcl,Elovl6,Efna1,Cep85,Dyrk1b,Adam17,Exoc6b,Rnf139,Map2k6,Hus1,Abhd5,Ggct,Lpcat3,Rhno1,Abcc4,Iba57,Eya4,R…
GO:0070647	protein modification by small protein conjugation or removal	6.22242e-29	-64.9468	572	300	0.0471921	6357	20933	71101,83962,67118,235461,78787,15204,94093,66053,68943,228662,224023,66172,73998,68366,268470,70620,56353,21951,223527,99382,70097,71779,216440,109115,80751,71458,54484,66743,26895,216080,94253,327799,223455,74996,22200,19821,56771,52323,216825,226098,66155,100683,217558,170930,235323,225055,321008,72296,66799,26572,230484,140499,328234,67921,72607,69807,15185,71956,110616,224826,22217,68031,3299…	Uvssa,Btbd1,Bfar,Fam63b,Usp54,Herc2,Trim33,Ppil2,Pink1,Btbd3,Klhl22,Med11,Herc3,Tmem129,Ube2z,Ube2v2,Rybp,Tnks,Eny2,Abtb2,Sash1,March8,Os9,Supt3,Rnf34,Bcor,Mkrn1,Rnf220,Cops7b,Ube2d1,Hecw1,Usp44,March6,Usp47,Uba3,Rnf2,Med20,Klhl7,Usp22,Hectd2,Ufc1,Trrap,G2e3,Sumo2,Usp28,Fbxo11,6330408A02Rik,Rusc1,Ube2w,Cops3,Usp1,Ube2j2,Rnf182,Ube2f,Usp13,Trim32,Hdac6,Rnf135,Atxn3,Ubr2,Usp12,Rnf146,Usp24,Usp14,So…
GO:0034654	nucleobase-containing compound biosynthetic process	3.68172e-28	-63.169	2131	873	0.137329	6357	20933	22780,21417,67040,381022,18028,93736,217864,269003,114640,64424,110446,13982,12394,217732,233033,72568,17131,65020,76199,235028,73389,242509,17355,70127,319945,226830,15900,71458,71242,55994,73569,29871,52708,56380,331623,22427,27049,74016,94093,22278,66354,56501,218850,101685,14281,21834,71834,66172,56070,56706,26939,241066,74434,26416,15387,50907,328801,74450,207785,27056,71330,207165,232232,27…	Ikzf3,Zeb1,Ddx17,Kmt2d,Nfib,Aff4,Rcor1,Sap130,Pth2,Polr1e,Acat1,Esr1,Runx1,Cipc,Samd4b,Lin9,Smad7,Zfp110,Med13l,Zfp426,Hbp1,Bnc2,Aff1,Dpf3,Flad1,Smyd2,Irf8,Bcor,Spata24,Smad9,Vgll3,Scmh1,Zfp410,Arid3b,Bend3,Wrn,Etv3,Phf19,Trim33,Usf1,Snw1,Elf4,Fam208a,Spty2d1,Fos,Thrb,Zbtb43,Med11,Tcerg1,Ccnl1,Polr3e,Carf,Sohlh2,Mapk14,Hnrnpk,Preb,Zfp414,Pank2,Csrnp2,Irf5,Rcbtb1,Bptf,Hdac11,Snf8,Pcna,Rfx8,Mphosph…
GO:0032774	RNA biosynthetic process	8.55575e-28	-62.3258	1896	789	0.124115	6357	20933	18193,50873,228913,20481,52615,22698,12142,69792,57316,73754,246103,545725,68045,12224,12914,231991,12393,215031,58202,19015,104382,76022,18099,74164,100336,235134,114142,106389,24075,75302,67781,67014,22596,244694,103836,108961,11569,226470,69260,74377,56233,17684,22701,15404,57782,56207,74414,22025,56404,104348,70601,232334,15214,338372,18519,17420,20585,19822,27374,93759,170740,21761,56198,178…	Nsd1,Park2,Zfp217,Ski,Suz12,Zfp39,Prdm1,Med6,C1d,Thap1,Atxn7,Mterf1a,2700060E02Rik,Klf5,Crebbp,Creb5,Runx2,Vgll2,Nelfb,Ppard,Barhl2,Gon4l,Nlk,Nfx1,Ppp1r8,Nfrkb,Foxp2,Eaf2,Taf10,Asxl2,Ilf2,Mina,Xrcc5,Kdm4d,Zfp692,E2f8,Aebp2,Zbtb41,Ing2,Hsf2bp,Hdac7,Cited2,Zfp41,Hoxa7,Rbak,Uchl5,Polr3c,Nr2c1,Trip4,Zfp120,Ecd,Vgll4,Hey2,Map3k9,Kat2b,Mnat1,Hltf,Rnf4,Prmt5,Sirt1,Zfp287,Morf4l1,Heyl,Commd1,Brf2,Purb,Zf…
GO:0033554	cellular response to stress	1.93269e-27	-61.5109	1243	553	0.0869907	6357	20933	66155,69928,225872,13872,100683,723821,223455,11991,12952,19355,22339,104884,16882,26383,98415,229317,11792,15441,20788,76454,12042,433759,22218,230484,56196,66799,50505,110616,69922,235623,56426,72607,67921,22632,107227,208836,71567,272158,106200,56190,269400,14169,11757,69596,17920,224045,15204,66626,12367,66725,68240,68943,14775,67579,11865,11793,216440,233789,12753,70620,56249,69716,53382,590…	Ufc1,Apitd1,Npas4,Ercc3,Trrap,Mir199a-2,March6,Hnrnpd,Cry1,Rad1,Vegfa,Tdp1,Lig3,Fto,Nucks1,Eif2a,Apex1,Hp1bp3,Srebf2,Fbxo31,Bcl10,Hdac1,Sumo1,Usp1,Tdp2,Ube2w,Ercc4,Atxn3,Vrk2,Scap,Pdcd10,Usp13,Ube2f,Yy1,Macrod1,Fanci,Mcm9,Poln,Txndc11,Rbm38,Rtel1,Fgf14,Prdx3,Ap5s1,Myo6,Eif2b5,Herc2,Cdip1,Casp3,Lrrk2,Rpa3,Pink1,Gpx1,Cpeb4,Arntl,Atg5,Os9,Smg1,Clock,Ube2v2,Actr8,Trip13,Txnl1,Stk25,Itpr1,Neil1,Zfp622…
GO:0044265	cellular macromolecule catabolic process	4.02315e-27	-60.7777	648	326	0.0512821	6357	20933	319651,30940,224671,67123,231600,26443,30931,56228,17350,51902,12457,103135,22129,14733,66881,108660,69754,74112,22224,29864,72662,67089,17847,14852,66967,19704,105841,68209,72544,229512,76577,74132,75841,56736,13030,26965,69639,27362,56085,65256,50753,70238,50754,50755,23806,106052,22687,69077,59003,22225,242960,69116,71701,54644,232791,230738,217194,53312,16396,84092,50762,18983,18521,17246,664…	Usp37,Usp25,Btbd9,Ubap1,Chfr,Psma6,Tor1a,Ube2j1,Mlh1,Rnf24,Noct,Pan2,Ttc3,Gpc1,Pcyox1,Rnf187,Fbxo7,Usp16,Usp10,Rnf11,Dis3,Psmc6,Usp34,Gspt1,Edem3,Upf1,Dennd3,Rnaseh2c,Exosc6,Smg5,Faf2,Rnf6,Rnf139,Rnf14,Ctsb,Cul1,Exosc8,Dnajb9,Ubqln1,Asb2,Fbxo8,Rnf168,Fbxw7,Fbxo18,Arih1,Fbxo4,Zpr1,Psmd11,Maea,Usp5,Fbxl5,Ubr4,Pnpt1,Otud5,Cnot3,Zc3h12a,Klhl11,Nub1,Itch,Usp8,Fbxo6,Cnot7,Pcbp2,Mdm2,Magohb,Uba6,Exosc10…
GO:0006351	transcription, DNA-templated	8.31162e-27	-60.0521	1888	782	0.123014	6357	20933	75565,71952,18986,235469,338523,12827,30923,73178,16870,22083,73916,16599,108079,66953,18142,57432,14050,12395,68016,14536,106143,213464,21422,218613,14531,233410,26399,319955,17341,80859,93760,22764,99890,229906,30937,14051,15904,22722,12455,17342,78893,51813,22697,18139,328365,54367,74112,14634,77110,57321,21384,232023,20847,15407,20184,23856,170791,213054,105689,19885,330502,20384,56456,67222,…	Sgf29,2410016O06Rik,Pou2f1,Zfp280d,Kdm7a,Col4a2,Foxe3,Wasl,Lhx2,Ctr9,Ift57,Klf3,Prkaa2,Cdca7,Npas1,Zc3h8,Eya3,Runx1t1,Murc,Nr6a1,Cggbp1,Rbbp5,Tfcp2,Mier3,Gcm1,Zfp592,Map2k6,Ercc6,Bhlha15,Nfkbiz,Arid1a,Zfx,Prmt6,Gtf2b,Lmcd1,Eya4,Id4,Zfp64,Ccnt1,Mitf,Cnot10,Ccnc,Zscan21,Zfp638,Zmiz1,Zfp326,Usp16,Gli3,Gpbp1l1,Terf2ip,Tbx15,Vopp1,Stat2,Hoxb1,Uimc1,Dido1,Rbm39,Gabpb2,Mycbp2,Rorc,Zfp82,Srsf5,Actl6a,Srf…
GO:0044085	cellular component biogenesis	9.25979e-27	-59.9441	2057	841	0.132295	6357	20933	81898,53895,319155,68729,52521,382056,13018,53323,68708,380921,69259,69726,73739,17364,99167,228536,21355,68193,80291,89867,233871,242687,67941,56075,12617,225326,56200,70683,98376,26951,231386,56088,56208,20460,66161,54525,28000,13405,21916,14672,11735,380718,66278,230597,105787,320790,76438,237911,20656,226519,229937,20619,231580,66537,18011,319182,57342,26395,13666,21371,60595,53331,108058,245…	Sf3b1,Clpp,Hist1h4c,Trim37,Zfp622,Crtc1,Ctcf,Ube2k,Rabl2,Dgkh,Kctd5,Smyd3,Cby1,Trpm1,Ssx2ip,Bahd1,Tap2,Rpl24,Rilpl2,Sec16b,Atxn2l,Wasf2,Rps27l,Pdss1,Cenpc1,Pik3c3,Ddx21,Utp20,Gorab,Zw10,Ythdc1,Psmg1,Becn1,Stil,Pop4,Syt7,Prpf19,Dmd,Tmod1,Gna11,Ank3,Mks1,Smim20,Zfyve9,Prkaa1,Chd7,Rftn1,Brip1,Sod2,Lamc1,Znhit6,Snap23,Gak,Pomp,Neurl1a,Hist1h2bh,Parva,Map2k1,Eif2ak3,Tbca,Actn4,Stx7,Camk2d,Ift52,Hist2h…
GO:0046907	intracellular transport	9.88041e-27	-59.8792	991	457	0.0718893	6357	20933	66887,67105,83431,68581,170762,210148,56398,12053,226407,70297,56291,74412,16573,70349,11487,235442,17828,20913,67952,13858,69823,76959,20910,67819,227801,69178,228960,216810,15525,66713,226422,242557,74732,66541,16783,68151,99889,70572,223332,67694,74375,105782,20742,24015,27054,17918,227800,16211,94190,58244,21856,66449,16570,20479,214585,18457,223754,15239,103677,264134,116837,73666,83946,2180…	Lonp2,Timm21,Ndel1,Tmed10,Nup155,Slc30a6,Chp1,Bcl6,Rab3gap1,Gcc2,Styx,Gle1,Kif5b,Copb1,Adam10,Rab8b,Bloc1s5,Stxbp4,Tomm20,Eps15,Fyttd1,Chmp5,Stxbp1,Derl1,Dennd1a,Snx5,Stx16,Tom1l2,Hspa4,Actr2,Rab29,Atg4c,Stx11,Immp1l,Lamp1,Wls,Arfip1,Ipo5,Ranbp3l,Ift74,Gcc1,Scrib,Sptbn1,Abce1,Sec23b,Myo5a,Rabgap1,Kpnb1,Ophn1,Stx6,Timm44,Pam16,Kif3c,Vps4b,Spg11,Bloc1s6,Tbc1d22a,Hgs,Smg6,Ttc26,Rims1,Thoc3,Phip,Tgfb…
GO:0097659	nucleic acid-templated transcription	1.00449e-26	-59.8627	1889	782	0.123014	6357	20933	21834,14281,101685,218850,241066,56706,56070,26939,71834,66172,26416,74434,207785,328801,50907,15387,52708,29871,331623,56380,22278,94093,74016,27049,56501,66354,72568,233033,76199,17131,65020,242509,73389,235028,55994,73569,71242,15900,71458,226830,70127,17355,67040,381022,21417,22780,217864,93736,18028,64424,269003,217732,13982,12394,15257,219132,24074,216825,104263,238693,102162,226182,226641,…	Thrb,Fos,Spty2d1,Fam208a,Carf,Ccnl1,Tcerg1,Polr3e,Zbtb43,Med11,Mapk14,Sohlh2,Csrnp2,Zfp414,Preb,Hnrnpk,Zfp410,Scmh1,Bend3,Arid3b,Usf1,Trim33,Phf19,Etv3,Elf4,Snw1,Lin9,Samd4b,Med13l,Smad7,Zfp110,Bnc2,Hbp1,Zfp426,Smad9,Vgll3,Spata24,Irf8,Bcor,Smyd2,Dpf3,Aff1,Ddx17,Kmt2d,Zeb1,Ikzf3,Rcor1,Aff4,Nfib,Polr1e,Sap130,Cipc,Esr1,Runx1,Hipk1,Phf11d,Taf7,Usp22,Kdm3a,Zfp58,Taf5l,Taf5,Atf6,Znrd1,Nmi,Zfp661,Tnip…
GO:0032446	protein modification by small protein conjugation	2.51363e-26	-58.9455	453	245	0.0385402	6357	20933	319817,73998,66172,107568,224023,228662,81003,207952,24017,68366,231670,15204,52563,226541,74493,67118,83962,75212,71101,104836,68943,66053,55983,94093,52206,99382,22215,218215,21951,66743,71458,54484,78832,80751,216440,109331,14048,70097,71779,209462,235497,70620,268470,246293,17999,20834,19823,74244,270627,434246,67128,12021,218793,75717,30945,22032,93765,56353,268281,22644,66155,68497,226098,7…	Rc3h2,Herc3,Med11,Wwp1,Klhl22,Btbd3,Trim23,Klhl25,Rnf13,Tmem129,Fbxo21,Herc2,Cdc23,Klhl20,Tnks2,Bfar,Btbd1,Rnf121,Uvssa,Cbll1,Pink1,Ppil2,Pdzrn3,Trim33,Anapc4,Abtb2,Ube3a,Rnf144b,Tnks,Rnf220,Bcor,Mkrn1,Cacul1,Rnf34,Os9,Rnf20,Eya1,Sash1,March8,Hace1,Leo1,Ube2v2,Ube2z,Klhl8,Nedd4,Znrf4,Rnf7,Atg7,Taf1,Trim72,Ube2g1,Bard1,Ube2e2,Cul5,Rnf19a,Traf4,Ube2n,Rybp,Shprh,Rnf103,Ufc1,Arel1,Hectd2,Btbd11,Rnf8,…
GO:0044248	cellular catabolic process	2.45023e-25	-56.6684	1092	490	0.0770804	6357	20933	228662,73998,11757,67452,68366,15107,69305,19170,320011,207728,229663,381305,67118,69219,245847,83962,208718,66997,14660,269378,15204,68276,14775,54607,74108,20397,59007,66373,26931,66422,11865,233033,83965,16434,66153,19305,381293,99382,71723,233789,74133,80751,14874,216440,14719,104625,100715,12370,12753,11907,11364,240028,268470,18573,17117,110446,18575,232449,77626,19172,54473,58810,226098,11…	Btbd3,Herc3,Prdx3,Pnpla8,Tmem129,Hadh,Dcps,Psmb1,Uggt1,Pde2a,Csde1,Rc3h1,Bfar,Ddah1,Amdhd2,Btbd1,Dis3l2,Psmd12,Gls,Ahcy,Herc2,Toe1,Gpx1,Socs6,Parn,Sgpl1,Ngly1,Lsm5,Ppp2r5c,Dctpp1,Arntl,Samd4b,Enpp5,Itpa,Fbxo36,Pex5,Kif14,Abtb2,Dhx34,Smg1,Smg8,Rnf34,Gstz1,Os9,Got2,Cnot6,Papd4,Casp8,Clock,Ate1,Acadm,Lnpep,Ube2z,Pde1a,Amacr,Acat1,Pde1c,Dera,Smpd4,Psmb4,Tollip,Akr1a1,Hectd2,Adrb1,Usp22,Upf2,Ubxn8,Man…
GO:0007049	cell cycle	4.75085e-25	-56.0063	1038	469	0.0737769	6357	20933	381644,12428,19735,12532,21951,72568,77579,76915,67733,384619,381293,71782,74847,17345,72149,56249,69716,50850,21376,28193,216848,68724,18472,18003,224023,269400,67117,56190,208836,23988,108907,268697,15270,60344,72776,83560,17451,70218,71819,208718,23922,67166,26934,102060,219114,108912,13560,76454,67922,211978,12530,68142,16882,18538,18763,18571,14020,69581,224826,70235,56150,103080,72400,76044…	Cep135,Ccna2,Rgs2,Cdc25c,Tnks,Lin9,Myh10,Mnd1,Itgb3bp,Ccdc155,Kif14,Ankle2,Meikin,Mki67,Strada,Actr8,Trip13,Spast,Tbrg1,Reep3,Chd3,Arl8a,Pafah1b1,Nedd9,Klhl22,Rtel1,Dynlt3,Rbm38,Fanci,Pin1,Nusap1,Ccnb1,H2afx,Fign,Sass6,Tex14,Mos,Kif18b,Kif23,Dis3l2,Jtb,Arl8b,Racgap1,Gadd45gip1,Ska3,Cdca2,E4f1,Fbxo31,Fam32a,Zfyve26,Cdc25a,Ino80,Lig3,Pcna,Pkd1,Pdcd6ip,Evi5,Rhou,Ubr2,Poc1a,Mad2l1,Sept10,Pinx1,Ncapg2…
GO:0043632	modification-dependent macromolecule catabolic process	1.52628e-24	-54.8392	429	231	0.0363379	6357	20933	69077,66894,228769,106052,71701,83814,66435,93836,244373,59003,69116,22225,50873,242960,65256,225743,50753,67138,70238,69639,27362,218203,56085,22284,23806,56812,76302,50754,19359,12488,28084,67812,50912,231380,69259,217379,19053,19173,217194,53312,16396,54644,56407,236904,99011,56207,72179,18521,68053,17246,77593,84092,70797,50762,66597,56228,170707,19184,93759,30931,74256,19822,18786,22088,2212…	Psmd11,Wwp2,Psmf1,Fbxo4,Pnpt1,Nedd4l,Uggt2,Rnf111,Erlin2,Maea,Ubr4,Usp5,Park2,Fbxl5,Asb2,Rnf165,Fbxo8,Herc6,Rnf168,Exosc8,Dnajb9,Mylip,Ubqln1,Usp9x,Arih1,Dnajb2,Pcnp,Fbxw7,Rad23b,Cd2ap,Vps25,Ubxn4,Exosc10,Uba6,Kctd5,Ubxn2a,Ppp2cb,Psmb5,Klhl11,Nub1,Itch,Otud5,Trpc4ap,Klhl15,Pomt1,Uchl5,Fbxl2,Pcbp2,Ubxn2b,Mdm2,Usp45,Usp8,Ankib1,Fbxo6,Trim13,Ube2j1,Usp48,Psmc5,Sirt1,Tor1a,Cyld,Rnf4,Plaa,Tsg101,Ttc3,…
GO:0043933	macromolecular complex subunit organization	1.92042e-24	-54.6095	1735	718	0.112946	6357	20933	66410,68184,14151,544971,70356,68142,109263,66405,20319,22130,12972,15185,50708,13669,72480,71330,67151,207165,56046,232232,230649,319185,107869,240614,229211,320806,216825,24074,217265,109900,66482,104263,102162,19821,103136,77782,11764,218214,216001,66700,20586,22367,107823,15368,23874,319172,67804,226830,77853,70127,110809,71458,57837,66422,381293,269003,12955,110446,64424,54401,100503670,7214…	Mterf3,Denr,Fech,Bdp1,St13,Ino80,Rlf,Mcts2,Sfrp2,Ttf1,Cryz,Hdac6,Hist1h1c,Eif3a,Tspyl4,Rcbtb1,Psmd9,Bptf,Uqcc1,Hdac11,Atpaf1,Hist1h2bl,Cth,Ranbp6,Acad9,Gfm2,Usp22,Taf7,Abca5,Asl,Exoc2,Kdm3a,Taf5l,Rnf2,Pwp1,Polq,Ap1b1,Kdm1b,Micu1,Chmp3,Smarca4,Vrk1,Whsc1,Hmox1,Farsb,Hist1h2ab,Snx2,Smyd2,Msl2,Dpf3,Srsf1,Bcor,Eral1,Dctpp1,Kif14,Sap130,Cryab,Acat1,Polr1e,Ywhab,Rpl5,Strada,Kmt2d,Dnajc28,Las1l,Dnm1l,Me…
GO:0016567	protein ubiquitination	3.33874e-24	-54.0564	414	224	0.0352367	6357	20933	66053,68943,94093,52206,55983,226541,74493,15204,52563,231670,71101,104836,67118,83962,75212,207952,68366,24017,73998,66172,319817,224023,81003,228662,107568,218793,75717,434246,67128,12021,268281,22644,22032,30945,93765,56353,268470,70620,246293,235497,20834,19823,270627,17999,80751,216440,109331,66743,54484,78832,71458,70097,71779,209462,99382,22215,218215,21951,56771,12234,28077,68867,69790,10…	Ppil2,Pink1,Trim33,Anapc4,Pdzrn3,Klhl20,Tnks2,Herc2,Cdc23,Fbxo21,Uvssa,Cbll1,Bfar,Btbd1,Rnf121,Klhl25,Tmem129,Rnf13,Herc3,Med11,Rc3h2,Klhl22,Trim23,Btbd3,Wwp1,Ube2e2,Cul5,Trim72,Ube2g1,Bard1,Shprh,Rnf103,Traf4,Rnf19a,Ube2n,Rybp,Ube2z,Ube2v2,Klhl8,Leo1,Znrf4,Rnf7,Taf1,Nedd4,Rnf34,Os9,Rnf20,Rnf220,Mkrn1,Cacul1,Bcor,Sash1,March8,Hace1,Abtb2,Ube3a,Rnf144b,Tnks,Med20,Btrc,Med10,Rnf122,Med30,Fbxw11,Klh…
GO:0006397	mRNA processing	4.28114e-24	-53.8078	374	207	0.0325625	6357	20933	53609,20901,53890,56417,67197,229700,68183,225160,72290,268859,27374,74157,230908,330361,66549,53317,80744,12457,103135,22380,70601,67242,52897,101437,20639,54367,230753,53861,219158,66637,56215,108014,20922,232314,68927,67229,22185,27366,78372,66603,101214,68295,214498,71514,28000,66618,56758,66921,14300,78651,20384,20492,11834,268420,54633,66381,100336,170791,78688,76167,20643,22687,20815,20630…	Clasrp,Strap,Sart3,Adar,Zcrb1,Rbm15,Bcas2,Thoc1,Lsm11,Rbfox1,Prmt5,Cmtr1,Tardbp,Gcfc2,Aggf1,Plrg1,Cwc22,Noct,Pan2,Wbp4,Ecd,Gemin6,Rbfox3,Dhx32,Snrpb2,Zfp326,Thrap3,Zranb2,Ccar2,Tsen15,Acin1,Srsf9,Supt4a,Ppp4r2,Ptcd2,Prpf18,U2af2,Txnl4a,Snrnp25,Gemin2,Tra2a,Aar2,Cdc73,Sfpq,Prpf19,Snrnp27,Mbnl1,Prpf38b,Frg1,Lsm6,Srsf5,Slbp,Aqr,Alkbh5,Pqbp1,Rnf113a2,Ppp1r8,Rbm39,Nol3,Snrnp35,Snrpe,Zpr1,Srpk1,Snrpc,Z…
GO:0022613	ribonucleoprotein complex biogenesis	3.3891e-23	-51.7389	362	200	0.0314614	6357	20933	67070,27374,93759,75593,66448,330361,71952,67242,59014,217995,207704,237107,12457,56417,53890,69237,217869,224481,69821,20901,78581,16865,98956,67459,18148,68979,20115,72544,229937,214498,68295,66603,106298,69499,72171,12121,27366,67239,382137,72181,103573,67390,67229,109075,72662,57316,231386,72193,66254,214150,67941,20630,56200,70683,70285,14105,22184,66161,212508,67276,14300,78651,69639,230737…	Lsm14a,Prmt5,Sirt1,Malsu1,Mrpl20,Gcfc2,2410016O06Rik,Gemin6,Rrs1,Heatr1,Gtpbp10,Gnl3l,Noct,Adar,Sart3,Gtpbp4,Eif5,Tfb1m,Mterf4,Strap,Utp23,Eif2d,Nat10,Nvl,Npm1,Nol11,Rps7,Exosc6,Znhit6,Cdc73,Aar2,Gemin2,Rrn3,Tsr2,Shq1,Bicd1,Txnl4a,Rpf2,Fdxacb1,Nsun4,Xpo1,Rnmtl1,Prpf18,Exosc4,Dis3,C1d,Ythdc1,Scaf11,Dimt1,Ago3,Rps27l,Snrpc,Ddx21,Utp20,Rpf1,Srsf10,Zrsr2,Pop4,Mtg1,Eri1,Frg1,Lsm6,Exosc8,Gnl2,Prpf19,Mb…
GO:0019941	modification-dependent protein catabolic process	3.42254e-23	-51.7291	422	225	0.0353941	6357	20933	12753,11907,268470,246293,17999,19823,20834,270627,52231,434246,67128,75717,54473,30945,20479,93765,230709,22644,78896,21762,381293,22215,99382,218215,26931,11865,66153,22433,78832,30838,80751,109331,216440,209462,15204,226144,226541,67118,75212,66997,83962,64136,52206,26444,66861,73998,107568,14479,228662,207952,68366,320011,26440,230484,140499,27681,107995,21929,209239,26572,66799,56791,321008,…	Clock,Ate1,Ube2z,Klhl8,Nedd4,Rnf7,Znrf4,Taf1,Ankzf1,Trim72,Ube2g1,Cul5,Tollip,Rnf19a,Vps4b,Ube2n,Zmpste24,Rnf103,1500015O10Rik,Psmd2,Kif14,Ube3a,Abtb2,Rnf144b,Ppp2r5c,Arntl,Fbxo36,Xbp1,Cacul1,Fbxw4,Rnf34,Rnf20,Os9,Hace1,Herc2,Erlin1,Klhl20,Bfar,Rnf121,Psmd12,Btbd1,Sdf2l1,Anapc4,Psma7,Dnajc10,Herc3,Wwp1,Usp15,Btbd3,Klhl25,Tmem129,Uggt1,Psma1,Usp1,Ube2j2,Snf8,Cdc20,Tnfaip3,Gan,Cops3,Ube2w,Ube2l6,63…
GO:0006511	ubiquitin-dependent protein catabolic process	4.54714e-23	-51.445	413	221	0.0347648	6357	20933	58799,66212,29864,67089,57296,66967,17847,227334,76857,74112,108660,69754,22214,22224,12402,76800,74132,76577,109815,207304,75841,56736,67923,56438,26965,231600,67123,108687,19185,232539,26443,52348,11797,74315,231672,319651,30940,71991,116733,224671,51902,386649,70160,18786,19822,22129,22088,93759,30931,74256,56228,170707,19184,70797,77593,84092,50762,66597,18521,17246,68053,56407,54644,236904,7…	Crbn,Sec61b,Rnf11,Psmc6,Psmd8,Edem3,Usp34,Usp40,Spopl,Usp16,Rnf187,Fbxo7,Ube2h,Usp10,Cbl,Usp42,Rnf6,Faf2,Selenos,Hectd1,Rnf139,Rnf14,Eloc,Rbx1,Cul1,Chfr,Ubap1,Edem2,Psmd4,Klhl42,Psma6,Vps37a,Birc2,Rnf145,Fbxw8,Usp37,Usp25,Ercc8,Vps4a,Btbd9,Rnf24,Nsfl1c,Vps36,Plaa,Rnf4,Ttc3,Tsg101,Sirt1,Tor1a,Cyld,Ube2j1,Usp48,Psmc5,Ankib1,Usp45,Usp8,Fbxo6,Trim13,Pcbp2,Mdm2,Ubxn2b,Trpc4ap,Otud5,Klhl15,Fbxl2,Uchl5,…
GO:0051179	localization	1.72468e-22	-50.1118	4371	1593	0.25059	6357	20933	11951,22229,545156,107513,104721,21854,66700,11881,216001,14084,67972,240614,109305,11502,66482,217265,66945,242773,235180,208647,654470,320051,69906,11966,269338,15185,79196,20615,68198,22272,26889,16401,14694,319953,67282,72515,66231,69076,54196,16649,17992,12464,54721,66661,11303,234076,223604,19330,22427,68512,12282,13211,227699,17451,13518,18472,12292,68366,268697,27008,98710,68010,252972,78…	Atp5g1,Ucp3,Kalrn,Ssr1,Ddx1,Timm17a,Chmp3,Arsb,Micu1,Faf1,Atp2b1,Ranbp6,Orai1,Adam9,Exoc2,Abca5,Sdha,Slc45a1,Fez1,Creb3l2,Tctn1,Exph5,Slc25a32,Atp6v1b2,Vps39,Hdac6,Osbpl5,Snapin,Ndufb2,Uqcrq,Cln8,Itga4,Rack1,Ttll1,Washc3,Wdr43,Thoc7,Triap1,Pabpn1,Kpna4,Ndufa4,Cct4,Tyk2,Srp72,Abca1,Tmco3,Kcnk9,Rab18,Wrn,Tomm5,Hyou1,Dhx9,Nup188,Mos,Dst,Pafah1b1,Cacna1s,Tmem129,Ccnb1,Micall1,Rabif,Bambi,Tpcn1,Avl9,Y…
GO:0000278	mitotic cell cycle	2.9244e-22	-49.5838	562	279	0.0438886	6357	20933	244879,14841,74112,319944,15904,234664,24063,27354,73804,15574,16765,12315,319651,12314,71909,231600,71175,19891,80280,53869,56399,54392,20620,12316,52679,77035,59014,212514,69736,72930,72508,73178,54394,54194,235072,19765,21853,84092,219103,67121,76499,22137,17246,22390,212307,100710,12615,66578,68067,103733,227720,102774,74187,105988,12531,228421,66296,100732,66197,242521,22687,70675,225745,670…	Npat,Gsg2,Usp16,Taf2,Id4,Nae1,Spry1,Nbn,Kif2c,Hus1,Stmn1,Calm3,Usp37,Calm2,Haus5,Chfr,Nipbl,Rpa2,Cdk5rap3,Rab11a,Akap8,Ncapg,Plk2,Aspm,E2f7,Kdm8,Rrs1,Spice1,Nup37,Ppp2r2b,Rps6kb1,Wasl,Crlf3,Akap8l,Sept7,Ralbp1,Timeless,Usp8,Cenpj,Mastl,Clasp2,Ttk,Mdm2,Wee1,Mapre2,Pds5b,Cenpa,Mis18a,Mrnip,Tubg1,Nup214,Bbs4,Katnb1,Espl1,Cdc25b,Kif18a,Haus2,Mapre3,Cks2,Klhl9,Zpr1,Vcpip1,Haus1,Chmp1b,Rad17,Cdc23,Ruvb…
GO:0009057	macromolecule catabolic process	2.93696e-22	-49.5795	735	346	0.0544282	6357	20933	76302,12488,19359,12177,56812,78651,22284,218203,225743,28000,67138,244373,50873,66435,93836,83814,56208,66894,228769,214150,70797,77593,20338,74617,66597,68053,56407,236904,56207,72179,99011,19053,19173,217379,69259,67812,53895,28084,75901,19185,108687,232539,52348,74315,11797,231672,378430,71991,116733,386649,70160,18786,19822,22088,93759,74256,170707,19184,109075,67229,58799,66212,69125,57296,…	Pcnp,Cd2ap,Rad23b,Bnip3l,Dnajb2,Lsm6,Usp9x,Mylip,Rnf165,Prpf19,Herc6,Erlin2,Park2,Uggt2,Rnf111,Nedd4l,Becn1,Wwp2,Psmf1,Ago3,Ankib1,Usp45,Sel1l,Scpep1,Trim13,Ubxn2b,Trpc4ap,Klhl15,Uchl5,Fbxl2,Pomt1,Ppp2cb,Psmb5,Ubxn2a,Kctd5,Ubxn4,Clpp,Vps25,Dcp1a,Psmd4,Edem2,Klhl42,Vps37a,Rnf145,Birc2,Fbxw8,Nanos2,Ercc8,Vps4a,Nsfl1c,Vps36,Plaa,Rnf4,Tsg101,Sirt1,Cyld,Usp48,Psmc5,Exosc4,Prpf18,Crbn,Sec61b,Cnot8,Psmd…
GO:0008380	RNA splicing	6.63254e-22	-48.7649	291	167	0.0262703	6357	20933	76936,66978,66877,66354,66185,66373,664883,72459,225027,70225,74044,19317,56194,73473,54723,76479,67288,76938,71702,67797,15387,98985,229279,69305,66585,17149,76522,70767,56190,69192,217207,66645,192196,114642,12261,70650,67996,71713,56009,381802,73666,110809,51796,15381,108121,13046,20926,57317,67207,66810,68272,192160,66055,56195,27756,66125,74351,104721,68981,67225,69131,433702,67039,68011,224…	Hnrnpm,Luc7l,Crnkl1,Snw1,1110037F02Rik,Lsm5,Nova1,Htatsf1,Srsf7,Ppil3,Ttf2,Qk,Prpf40a,Iws1,Tfip11,Smndc1,Srek1ip1,Rbm17,Cdc5l,Snrnp48,Hnrnpk,Clp1,Hnrnpa3,Dcps,Snrnp40,Magoh,Lsm8,Prpf3,Rbm38,Dhx16,Dhx8,Pspc1,Luc7l2,Brdt,C1qbp,Zcchc8,Srsf6,Cdc40,Alyref2,Tsen2,Thoc3,Srsf1,Srrm1,Hnrnpc,U2af1,Celf1,Supt6,Srsf4,Lsm1,Rbm22,Rbm28,Casc3,Sf3b6,Ptbp2,Lsm2,Sf3b5,Ddx23,Ddx1,Snrpa1,Rnpc3,Cdk12,Ncbp1,Rbm25,Snrp…
GO:0070727	cellular macromolecule localization	1.08158e-21	-48.2759	1117	486	0.0764512	6357	20933	18441,107338,14048,12757,236915,21808,229709,226151,83946,27494,116837,93742,218210,72124,192160,18969,11933,28113,12385,66913,66449,21856,58244,19357,264134,98732,234814,15239,223754,19400,338467,19298,66397,17113,74718,20336,73122,338349,26413,237542,69276,56217,84652,14828,17274,105835,15277,71943,67025,71146,75964,30056,382864,244667,69865,13383,338337,76582,240641,107939,19877,74493,64933,21…	P2ry1,Gbf1,Eya1,Clta,Arhgef9,Tgfb2,Ahcyl1,Fam178a,Phip,Amot,Rims1,Pard3,Nup153,Seh1l,Casc3,Pola2,Atp1b3,Tinf2,Ctnna1,Kdelr2,Pam16,Timm44,Stx6,Rad21,Ttc26,Rab3gap2,Mthfsd,Hgs,Tbc1d22a,Rapsn,Morc3,Pex19,Sar1b,M6pr,Snx16,Exoc4,Tgfbrap1,Cntln,Mapk1,Osbpl8,Sec62,Mpp5,Fam126a,Hspa5,Rab8a,Sgsm3,Hk2,Tom1l1,Rpl11,Golga7b,Trappc8,Timm9,Colq,Disc1,A1cf,Dlg1,Cog3,Ipo11,Kif20b,Pom121,Rock1,Tnks2,Ap3m2,Cep68,S…
GO:1903047	mitotic cell cycle process	2.50666e-21	-47.4353	538	267	0.0420009	6357	20933	14211,102423,17931,227331,18795,67052,13000,83431,56317,12649,93687,217232,107047,22061,72391,70385,22428,76959,59008,12626,231724,448987,17222,69556,12313,94315,217718,67139,51792,229776,16211,19290,58230,16551,100088,235661,70891,18541,327762,20742,235559,76464,50523,12323,67974,11789,11909,20479,12237,19357,68942,72124,218210,11477,259279,50496,14048,12757,12452,78832,56505,52563,19356,233276,…	Smc2,Hinfp,Ppp1r12a,Gigyf2,Plcb1,Ndc80,Csnk2a2,Ndel1,Anapc7,Chek1,Csnk1a1,Cdc27,Psmg2,Trp63,Cdkn3,Spdl1,Dctn6,Chmp5,Anapc5,Cetn3,Rad9b,Fbxl7,Anapc1,Bod1,Calm1,Prcc,Nek9,Mis12,Ppp2r1a,Cdc14a,Kpnb1,Pura,Rnf8,Kif11,Rcc1,Dync1li1,Spdya,Pcnt,Dna2,Sptbn1,Topbp1,Knl1,Lats2,Camk2b,Ccny,Apc,Atf2,Vps4b,Bub3,Rad21,Chmp2b,Seh1l,Nup153,Acvr1,Tubgcp3,E2f6,Eya1,Clta,Ccng2,Cacul1,Ruvbl1,Cdc23,Rad17,Tubgcp5,Cep19…
GO:1901575	organic substance catabolic process	2.92803e-21	-47.28	1249	532	0.0836873	6357	20933	73998,77432,69305,67452,229663,14660,245847,208718,15204,68276,19062,114663,20397,50767,16434,83965,66153,26931,11865,319625,19305,233789,216440,74133,12183,100715,14719,104625,268470,240028,18573,12753,11907,232449,18575,19172,11554,15450,81004,77559,18293,433702,236511,26874,24127,338359,20524,223455,327799,104831,27756,80898,72141,74121,52323,66514,76454,67338,22222,321008,66799,26572,230484,7…	Herc3,9530002B09Rik,Dcps,Pnpla8,Csde1,Gls,Amdhd2,Dis3l2,Herc2,Toe1,Inpp5k,Impa2,Sgpl1,Pnpla6,Itpa,Enpp5,Fbxo36,Ppp2r5c,Arntl,Galm,Pex5,Smg1,Os9,Smg8,Bpgm,Papd4,Got2,Cnot6,Ube2z,Lnpep,Pde1a,Clock,Ate1,Dera,Pde1c,Psmb4,Adrb1,Lipc,Tbl1xr1,Agl,Ogdh,Ncbp1,Ago1,Abcd2,Xrn1,Supv3l1,Slc25a17,March6,Usp44,Ptpn23,Lsm2,Erap1,Adpgk,Acoxl,Klhl7,Asrgl1,Fbxo31,Rffl,Ubr1,6330408A02Rik,Ube2w,Cops3,Usp1,Usp13,Usp12…
GO:0034613	cellular protein localization	8.26163e-21	-46.2427	1107	479	0.07535	6357	20933	544696,67694,70572,68151,99889,16783,66541,74732,12389,242557,66797,69940,226422,67139,216810,15525,16211,26425,227800,11843,17918,27054,20742,53380,66096,22239,50523,67943,74375,76464,67952,209361,20913,234678,21929,235442,70349,56224,56291,70297,226407,12053,56398,68581,170762,67105,66887,228960,77037,14178,19230,69178,74470,70385,67819,668212,216543,20910,107939,19877,74493,64933,244667,382864…	Tbc1d32,Ift74,Ipo5,Wls,Arfip1,Lamp1,Immp1l,Stx11,Cav1,Atg4c,Cntnap2,Exoc1,Rab29,Mis12,Tom1l2,Hspa4,Kpnb1,Nubp1,Rabgap1,Arf4,Myo5a,Sec23b,Sptbn1,Psmd10,Lamtor4,Ugt8a,Lats2,Mesdc2,Gcc1,Knl1,Tomm20,Taf3,Stxbp4,D230025D16Rik,Tnfaip3,Rab8b,Copb1,Tspan5,Styx,Gcc2,Rab3gap1,Bcl6,Chp1,Tmed10,Nup155,Timm21,Lonp2,Stx16,Mrap,Fgf7,Twf1,Snx5,Cep72,Spdl1,Derl1,Efr3b,Cep68,Stxbp1,Pom121,Rock1,Tnks2,Ap3m2,Disc1,C…
GO:0051234	establishment of localization	1.21559e-20	-45.8565	3439	1276	0.200724	6357	20933	20661,225887,52635,68944,192292,17281,67547,66154,53871,76983,55991,69227,56404,70425,67231,15526,54387,20338,56485,74498,76779,211673,110842,105727,72938,231834,380836,69048,16531,19878,13852,17973,319765,12768,72736,19338,21809,381605,71844,12330,20523,195236,214444,109552,59079,17957,30057,12121,71116,71803,55943,12299,66384,78232,68375,66212,24067,108000,69597,74136,59040,12190,54610,12374,22…	Sort1,Ndufs8,Esyt2,Tmco1,Nrbp1,Fyco1,Slc39a8,Tmem14c,Pkd2l2,Scfd1,Panx1,Selenot,Trip4,Csnk1g3,Tbc1d20,Hspa9,Mcm3ap,Sel1l,Slc2a5,Gorasp1,Cluap1,Arfgef1,Etfa,Slc38a1,Hspb11,Snx8,Mrs2,Slc30a5,Kcnma1,Rock2,Stx2,Nck1,Igf2bp2,Ccr1,Tmx1,Rab33b,Tgfb3,Tbc1d2,Nupl1,Canx,Slc25a14,Pom121l2,Cdk5rap2,Sri,Erbin,Napb,Timm8b,Bicd1,Stx18,Slc25a18,Stx8,Cacng1,Srp19,Trappc6b,Ndufa8,Sec61b,Srp54a,Cenpf,Afg3l2,Sec14l1…
GO:0022402	cell cycle process	4.43092e-20	-44.5631	796	362	0.0569451	6357	20933	19355,68743,213582,14453,13559,24127,12580,219072,327799,109019,224640,73738,21974,101994,22367,19055,13684,54141,217653,100683,69928,70235,224826,56150,18763,18538,69581,107995,56044,72400,76044,22350,223593,72515,50505,76454,102060,219114,108912,13560,211978,12530,68142,72776,60344,26934,67166,83560,17451,70218,71819,23922,208718,216848,68724,18472,18003,28193,208836,108907,268697,269400,224023…	Rad1,Anln,Map9,Gas2,E2f5,Xrn1,Cdkn2c,Haus4,Usp44,Nabp1,Lemd2,Haus7,Top2b,Champ1,Vrk1,Ppp3ca,Eif4e,Spag5,Mis18bp1,Trrap,Apitd1,Poc1a,Ubr2,Mad2l1,Pkd1,Pcna,Rhou,Cdc20,Rala,Pinx1,Ncapg2,Ezr,Washc5,Wdr43,Ercc4,Fbxo31,Gadd45gip1,Ska3,Cdca2,E4f1,Zfyve26,Cdc25a,Ino80,Sass6,Fign,Racgap1,Arl8b,Tex14,Mos,Kif18b,Kif23,Jtb,Dis3l2,Chd3,Arl8a,Pafah1b1,Nedd9,Reep3,Fanci,Nusap1,Ccnb1,Rtel1,Klhl22,Dynlt3,Rbm38,An…
GO:0009056	catabolic process	5.58596e-20	-44.3314	1317	551	0.0866761	6357	20933	14187,75686,71745,93747,19167,237553,11992,213350,17161,16889,224836,14555,229445,228608,58230,71997,327762,22123,50911,71169,18475,20437,26440,18641,18795,209239,268291,74182,100037258,208198,69902,19358,105193,270076,16589,26442,19063,75212,50877,226144,109778,107568,330260,13807,14479,26444,54381,234699,17149,56174,18125,103677,19823,18746,246293,12040,20479,93765,22644,231327,227095,66446,123…	Akr1b8,Nudt16,Cul2,Echs1,Psma3,Trhde,Auh,Pddc1,Maoa,Lipa,Usp49,Gpd1,Ctso,Smox,Rnf8,Smg9,Dna2,Psmd3,Exosc9,Nbas,Pafah1b2,Siah1a,Psma1,Pfkl,Plcb1,Gan,Rnf217,Gpcpd1,Dnajc3,Btbd2,Mrto4,Rad23a,Nhlrc1,Gcdh,Uhmk1,Psma5,Ppt1,Rnf121,Neu3,Erlin1,Blvra,Wwp1,Pon2,Eno2,Usp15,Psma7,Cpq,Edc4,Magoh,Nagk,Nos1,Smg6,Rnf7,Pkm,Klhl8,Bckdhb,Vps4b,Ube2n,Rnf103,Ppat,Hibch,Exosc7,Capn1,Adamts7,Zhx2,Psmd2,Eif3e,Rnf144b,Ca…
GO:0006796	phosphate-containing compound metabolic process	7.54667e-20	-44.0306	1594	648	0.101935	6357	20933	12166,242864,67857,67126,75292,20963,216965,635895,225010,83493,15254,433182,14923,66082,67655,192656,218294,329777,353172,329679,17258,269224,264064,108058,17240,71910,13666,26395,231580,17448,14208,77116,14186,241062,238564,18712,12566,228026,80752,99010,15212,19270,22385,235339,29869,22026,60505,12537,20815,225326,105787,30957,58994,66878,319887,216558,59125,11431,110208,104570,17346,11516,115…	Bmpr1a,Napepld,Ppp6c,Atp5e,Prkd3,Syk,Taok1,Gm7168,Lclat1,Sacm1l,Hint1,Eno1b,Guk1,Abhd6,Ctdp1,Ripk2,Cdc14b,Pigk,Gars,Fnip2,Mef2a,Pask,Cdk8,Camk2d,Mdfi,Plpp5,Eif2ak3,Map2k1,Gak,Mdh2,Ppm1g,Mtmr2,Fgfr4,Pgap1,Mylk4,Pim1,Cdk2,Pdk1,Fam20c,Lpcat4,Hexb,Ptprg,Baz1b,Dlat,Ulk2,Nr2c2,Il21,Cdk11b,Srpk1,Pik3c3,Prkaa1,Mapk8ip3,Smpd3,Riok3,E030030I06Rik,Ugp2,Nek7,Acp1,Pgd,Smek2,Mknk1,Adcyap1,Adss,Irak2,Chka,H6pd,…
GO:0031325	positive regulation of cellular metabolic process	8.52011e-20	-43.9093	2723	1033	0.162498	6357	20933	67974,15182,50911,54446,112405,58230,19696,14555,327762,81000,226422,98496,15500,269275,75686,381921,245007,73086,57765,15465,101739,170826,16589,50501,74205,268291,99982,56398,18045,12649,100037258,98582,14219,71902,18795,21898,71943,12905,18217,12954,57810,17200,235459,56013,26430,666048,240354,16963,226144,20587,54324,17300,109331,27223,11481,22433,16341,13626,52864,93765,114642,67979,20300,23…	Ccny,Hdac2,Exosc9,Nfat5,Egln1,Rnf8,Rel,Gpd1,Dna2,Rad54l2,Rab29,Pid1,Hsf2,Acvr1c,Nudt16,Taok2,Zbtb38,Rps6ka5,Tbx21,Hrh1,Psip1,Ppargc1b,Uhmk1,Prok2,Acsl3,Rnf217,Kdm1a,Chp1,Nfyb,Chek1,Dnajc3,Khdc1b,Ctgf,Cand1,Plcb1,Tlr4,Tom1l1,Cradd,Ntsr2,Cryaa,Cdon,Mc2r,Gtf2a2,Srcin1,Parg,Trabd2b,Malt1,Xcl1,Erlin1,Smarcb1,Arhgef5,Foxc1,Rnf20,Trp53bp1,Acvr2b,Xbp1,Eif3e,Eed,Slx4,Ube2n,Brdt,Atad1,Ccl25,Leo1,Vipr2,Abra…
GO:0051603	proteolysis involved in cellular protein catabolic process	9.50567e-20	-43.7998	483	241	0.037911	6357	20933	26440,27681,140499,230484,209239,21929,107995,26572,66799,56791,321008,22222,217069,100037258,59025,329908,66887,68031,22217,224826,110616,208198,66413,23802,268291,15185,17463,72607,69807,18571,67819,26442,224170,192193,105193,19358,67338,76454,100763,74996,223455,327799,71745,448987,94253,216080,103583,68867,52323,12234,19167,70247,104831,108159,22123,68497,224836,229445,226098,74007,58230,2168…	Psma1,Snf8,Ube2j2,Usp1,Gan,Tnfaip3,Cdc20,Cops3,Ube2w,Ube2l6,6330408A02Rik,Ubr1,Trim25,Dnajc3,Usp14,Usp24,Lonp2,Rnf146,Usp12,Ubr2,Atxn3,Btbd2,Psmd6,Amfr,Rnf217,Hdac6,Psmd7,Usp13,Trim32,Pdcd6ip,Derl1,Psma5,Dzip3,Edem1,Nhlrc1,Rad23a,Rffl,Fbxo31,Ube3c,Usp47,March6,Usp44,Cul2,Fbxl7,Hecw1,Ube2d1,Fbxw11,Rnf122,Klhl7,Btrc,Psma3,Psmd1,Ptpn23,Ubxn8,Psmd3,Arel1,Usp49,Ctso,Hectd2,Btbd11,Rnf8,Usp22,Uchl3,Huwe…
GO:0048522	positive regulation of cellular process	1.08166e-19	-43.6706	4584	1643	0.258455	6357	20933	109880,384783,72108,108079,26398,73916,17354,74998,16870,223690,73178,30923,72508,223870,21422,17965,14536,14732,20352,11855,110606,14531,80280,12064,71268,231600,64143,71175,432442,239273,19704,14051,30937,17341,18020,75841,26399,67469,27220,13853,14489,56367,268656,328365,13636,66049,11980,13549,14634,11491,56692,22402,22319,14131,67916,12455,20597,11518,66197,12985,18950,54411,104015,57321,110…	Braf,Irs2,Ddhd2,Prkaa2,Map2k4,Ift57,Mllt10,Rab11fip2,Lhx2,Ankrd54,Wasl,Foxe3,Rps6kb1,Senp1,Tfcp2,Nbl1,Nr6a1,Gpam,Sema4b,Arhgap5,Fntb,Gcm1,Cdk5rap3,Bdnf,Lrrfip2,Chfr,Ralb,Nipbl,Akap7,Abcc4,Upf1,Eya4,Lmcd1,Bhlha15,Nfatc2ip,Rnf139,Map2k6,Abhd5,Cartpt,Epm2a,Mtpn,Scoc,Sptlc1,Zmiz1,Efna1,Rogdi,Atp8a1,Dyrk1b,Gli3,Adam17,Lamtor3,Wisp1,Vamp3,Fcgr3,Plpp3,Ccnt1,Smpd1,Add1,Cks2,Csf3,Pnp,Atp6ap1,Synj1,Terf2ip…
GO:0010604	positive regulation of macromolecule metabolic process	1.10607e-19	-43.6483	2719	1031	0.162183	6357	20933	66354,56501,74016,14066,26390,14538,56380,75812,17451,56330,15387,207728,207785,68010,23988,268697,241066,21834,18584,75420,21832,67040,381022,21417,232560,67759,55994,110809,58231,218397,72238,381293,17131,192170,21941,242202,69263,69585,71093,20586,216080,23938,56347,226641,11502,104263,26408,217351,208647,18458,22781,20319,18538,15185,12283,56046,14694,27056,67151,207165,69076,17425,80857,1660…	Snw1,Elf4,Phf19,F3,Mapkbp1,Gcnt2,Arid3b,Tasp1,Mos,Pdcd5,Hnrnpk,Pde2a,Csrnp2,Bambi,Pin1,Ccnb1,Carf,Thrb,Pde8a,Secisbp2,Thpo,Ddx17,Kmt2d,Zeb1,Caprin2,Plgrkt,Smad9,Srsf1,Stk4,Rasa1,Tbc1d5,Kif14,Smad7,Eif4a3,Tnfrsf8,Pde5a,Rfc3,Hfe2,Atoh8,Smarca4,Ube2d1,Map2k5,Eif3c,Atf6,Adam9,Kdm3a,Map3k5,Tnrc6c,Creb3l2,Pabpc1,Ikzf4,Sfrp2,Pcna,Hdac6,Cab39,Uqcc1,Rack1,Irf5,Psmd9,Bptf,Triap1,Foxk1,Fgf20,Klf4,Cct4,Dhx36…
GO:0006793	phosphorus metabolic process	1.21265e-19	-43.5563	1657	669	0.105238	6357	20933	13665,15277,12850,16772,26564,407785,13837,338467,50799,103850,234356,19877,20617,217480,19106,53332,66885,27273,67420,17449,59027,56409,435391,266632,14048,74451,50932,66218,329421,102626,270627,224105,14149,17165,106504,13382,27369,229776,102247,51792,223775,52538,67444,52033,56690,55951,50523,433931,27103,78920,103583,12234,15258,217718,103806,110355,109079,668212,13841,240880,269180,12651,809…	Eif2s1,Hk2,Coq7,Lama1,Ror2,Ndufs6,Epha3,Morc3,Slc25a13,Nt5m,Csgalnact1,Rock1,Snca,Dgkb,Eif2ak2,Mtmr1,Acadsb,Pdk4,Far1,Mdh1,Nampt,Nudt3,Dupd1,Irak4,Eya1,Pgs1,Mink1,Ndufb9,Myo3b,Mapkapk3,Taf1,Pak2,Fdxr,Mapkapk5,Stk38,Dld,Dguok,Cdc14a,Gpat4,Ppp2r1a,Pim3,Acaa2,Ilkap,Pbk,Mlycd,Mpc1,Lats2,Pigg,Eif2ak4,Dlst,Fbxw11,Btrc,Hipk2,Nek9,Maml1,Grk2,Sephs1,Efr3b,Epha7,Scyl3,Inpp4a,Chkb,Uck2,Met,Tamm41,Dab2,Ptpre…
GO:0022607	cellular component assembly	2.5401e-19	-42.8169	1858	737	0.115935	6357	20933	216792,239273,66603,27366,72795,19329,22330,72982,74112,71365,22319,57028,105440,17342,67070,109880,108079,73916,67727,76238,54636,67443,73178,217335,11796,68968,217869,71909,211484,12064,235040,68016,53869,240595,69241,14270,240283,12615,14007,17436,76826,20103,14375,14083,50875,12390,104248,99237,211323,72569,14218,107197,193116,230738,15357,11747,12562,219103,209012,17246,108013,246703,26434,1…	Iba57,Abcc4,Gemin2,Txnl4a,Ttc19,Rab17,Vcl,Tmem138,Usp16,Pdss2,Vamp3,Pdxp,Kctd9,Mitf,Lsm14a,Braf,Prkaa2,Ift57,Stx17,Grhpr,Wdr45,Map1lc3b,Wasl,Fbf1,Birc3,Cdan1,Eif5,Haus5,Tsga10,Bdnf,Atg4d,Murc,Rab11a,Kcnv2,Polr2d,Srgap2,Dmxl1,Cenpa,Celf2,Me1,Nubpl,Rps5,Xrcc6,Ptk2,Tmod3,Cav2,Cabin1,Tm9sf4,Nrg1,Bbs5,Sh3pxd2a,Uqcc3,Slu7,Zc3h12a,Hmgcr,Anxa5,Cdh5,Cenpj,Ulk4,Mdm2,Celf4,Apoa1bp,Prnd,Cnot7,Rapgef6,Ccdc88a…
GO:0071702	organic substance transport	2.68097e-19	-42.7629	1679	675	0.106182	6357	20933	17257,110172,20524,100855,26422,107305,11818,192287,104831,18195,66352,56297,78808,77619,140740,74254,20520,433702,15450,52028,13614,66111,223593,22350,65246,73668,24044,22631,18763,218441,56442,30058,114896,55989,70456,67338,240726,69482,225027,218756,12068,18391,13645,93835,19062,11765,97112,18141,12638,666173,64930,17920,229279,109905,69596,12492,67452,56488,20912,77040,22042,217030,14719,7180…	Mecp2,Slc35b1,Slc25a17,Tbc1d14,Nbea,Vps37c,Apoh,Slc25a36,Ptpn23,Nsf,Blzf1,Arl6,Stxbp5,Prelid2,Sec63,Gpn1,Slc22a5,Ncbp1,Lipc,Bbs1,Edn1,Tmed3,Washc5,Ezr,Xpo7,Ttc21b,Scamp2,Ywhaz,Pkd1,Zfyve16,Serinc1,Timm8a1,Afg3l1,Nop58,Mpc2,Rffl,Slco5a1,Nup35,Srsf7,Slc4a7,Bet1,Sigmar1,Egf,Amn,Inpp5k,Ap1g1,Nmd3,Nup50,Cftr,Vps13b,Tsc1,Myo6,Hnrnpa3,Rap1a,Ap5s1,Scarb2,Pnpla8,Nxt1,Stxbp3,Atg16l1,Tfrc,Synrg,Got2,Plekhf2…
GO:0009893	positive regulation of metabolic process	2.81429e-19	-42.7144	2924	1097	0.172566	6357	20933	319974,20595,54391,319757,244694,108961,71296,19090,18984,14360,18771,99011,56404,22404,13197,244373,20481,19079,69792,26406,12142,211673,18590,68045,214150,246103,231991,56040,12224,12393,12768,72486,21809,19878,106389,17535,18567,23897,17973,13607,214498,214444,223453,22289,67923,66459,22185,60611,22411,56222,69125,21812,109700,213541,12611,66317,170823,15468,17864,100072,12374,70601,26419,1851…	Auts2,Smn1,Rfk,Smo,Kdm4d,E2f8,Crnde,Prkdc,Por,Fyn,Pknox1,Pomt1,Trip4,Wiz,Gadd45a,Erlin2,Ski,Prkab1,Med6,Map3k3,Prdm1,Arfgef1,Pdgfa,2700060E02Rik,Ago3,Atxn7,Creb5,Rplp1,Klf5,Runx2,Ccr1,Rnf219,Tgfb3,Rock2,Eaf2,Mre11a,Pdcd2,Hax1,Nck1,Eda,Cdc73,Cdk5rap2,Dap,Kdm6a,Eloc,Pyurf,U2af2,Foxj2,Wnt11,Cited4,Cnot8,Tgfbr1,Itga1,Ythdf2,Cebpg,Wdr61,Glmn,Prmt2,Mybl1,Camta1,Casr,Ecd,Mapk8,Kat2b,Mnat1,Tnc,Brca2,Dcp1…
GO:0044257	cellular protein catabolic process	3.41288e-19	-42.5216	497	245	0.0385402	6357	20933	105841,26445,109815,207304,75841,76800,74132,76577,56438,26965,13030,56736,67923,66881,227334,22224,240334,12402,76857,74112,69754,22214,108660,66212,29864,58799,17847,57296,66967,67089,30931,74256,93759,170707,19184,56228,51902,386649,70160,22129,22088,18786,19822,30940,71991,231672,319651,116733,224671,108687,19185,231600,67123,11797,74315,26443,232539,52348,231380,67812,28084,53895,19173,19053…	Dennd3,Psmb2,Selenos,Hectd1,Rnf139,Usp42,Rnf6,Faf2,Rbx1,Cul1,Ctsb,Rnf14,Eloc,Pcyox1,Usp40,Usp10,Pcyox1l,Cbl,Spopl,Usp16,Fbxo7,Ube2h,Rnf187,Sec61b,Rnf11,Crbn,Usp34,Psmd8,Edem3,Psmc6,Tor1a,Cyld,Sirt1,Usp48,Psmc5,Ube2j1,Rnf24,Nsfl1c,Vps36,Ttc3,Tsg101,Plaa,Rnf4,Usp25,Ercc8,Fbxw8,Usp37,Vps4a,Btbd9,Edem2,Psmd4,Chfr,Ubap1,Birc2,Rnf145,Psma6,Klhl42,Vps37a,Uba6,Ubxn4,Vps25,Clpp,Psmb5,Ppp2cb,Ubxn2a,Kctd5,U…
GO:0006974	cellular response to DNA damage stimulus	7.13875e-19	-41.7836	600	284	0.0446752	6357	20933	26447,22590,22224,56210,74112,66143,319583,72440,78903,93757,19704,14051,27354,319955,15574,99890,17688,213464,22034,13990,80280,19891,23808,12572,71175,14050,52679,22594,19687,75178,27280,22592,112407,21938,17350,19714,227099,97827,117599,21853,237877,56458,230738,50762,13663,67241,77976,78610,330554,17246,233545,100710,320209,14375,72836,72899,68067,18019,18708,56456,70238,71726,19164,15289,507…	Poli,Xpa,Usp10,Rev1,Usp16,Eef1e1,Lig4,Rhno1,Wrnip1,Immp2l,Upf1,Eya4,Nbn,Ercc6,Hus1,Prmt6,Msh6,Rbbp5,Traf6,Smarcad1,Cdk5rap3,Rpa2,Ash2l,Cdk7,Nipbl,Eya3,E2f7,Xrcc1,Rfc1,Meiob,Phlda3,Ercc5,Egln3,Tnfrsf1b,Mlh1,Rev3l,Pms1,Exd2,Helb,Timeless,Atad5,Foxo1,Zc3h12a,Fbxo6,Ei24,Smc6,Nuak1,Uvrag,Fan1,Mdm2,Emsy,Pds5b,Ddx11,Xrcc6,Pot1b,Macrod2,Mrnip,Nfatc2,Pik3r1,Actl6a,Rnf168,Smug1,Psen1,Hmgb1,Fbxw7,Ndnl2,Zbtb…
GO:0044710	single-organism metabolic process	1.01098e-18	-41.4356	2751	1036	0.16297	6357	20933	67311,319955,56695,29807,28042,20768,66967,21351,84094,57028,66129,70564,71365,66881,105148,52331,338523,71952,227120,108682,76238,22629,18648,228368,18805,17155,233824,56428,19302,13121,213272,14083,17436,53893,68106,14466,15357,18605,26384,14218,24057,57874,101490,665270,56749,66190,56012,257633,213012,19046,74782,66416,68646,170459,27362,223827,224794,11727,23894,407785,72999,66569,64136,19297…	Nanp,Ercc6,Pnkd,Tpk1,Selenoi,Sephs2,Edem3,Taldo1,Plvap,Pdxp,Aaed1,Fam213a,Pdss2,Pcyox1,Iars,Stbd1,Kdm7a,2410016O06Rik,Plcl1,Gpt2,Grhpr,Ywhah,Pgam1,Slc35c1,Pld1,Man1a,Cog7,Mtch2,Pex2,Cyp51,Txndc2,Ptk2,Me1,Nudt5,Nt5c3b,Gba,Hmgcr,Enpp1,Gnpda1,Sh3pxd2a,Sh3yl1,Hacd3,Inpp5f,Plb1,Dhodh,Acer3,Pgam2,Acsf3,Abhd10,Ppp1cb,Glt8d2,Ndufa7,Nadk2,Stard4,Dnajb9,Gxylt1,Enpp4,Ang,Gtf2h2,Ndufs6,Insig2,Gdpd1,Sdf2l1,Dh…
GO:0006886	intracellular protein transport	1.80055e-18	-40.8584	598	282	0.0443605	6357	20933	100226,22788,71116,66384,68938,252903,55943,27057,27058,20813,24067,66212,14296,103573,22627,271564,69597,67016,22630,71844,381605,195236,67669,76742,54161,17957,59079,109815,54214,53331,57915,53421,245866,16646,11769,319924,69821,20167,13185,20963,70699,57258,54610,70160,16412,66624,66687,21355,59021,18386,15526,210789,77371,20338,80291,258153,70296,103468,109676,20844,28084,99167,20660,11735,74…	Stx12,Zp3,Stx18,Srp19,Aspscr1,Ap1s3,Stx8,Ncoa4,Srp9,Srp14,Srp54a,Sec61b,Frat1,Xpo1,Ywhae,Vps13a,Afg3l2,Tbc1d2b,Ywhaq,Nupl1,Tbc1d2,Pom121l2,Hikeshi,Snx27,Copg1,Napb,Erbin,Selenos,Golga4,Stx7,Tbc1d1,Sec61a1,Ift52,Kpna1,Ap1s1,Apba1,Mterf4,Rtn2,Dscr3,Syk,Nup205,Xpo4,Tbc1d8,Vps36,Itgb1,Spcs2,Tbc1d15,Tap2,Rab2a,Oprd1,Hspa9,Tbc1d4,Sec24a,Sel1l,Rilpl2,Olfr412,Tbc1d13,Nup107,Ank2,Stam,Vps25,Ssx2ip,Sorl1,A…
GO:0006810	transport	3.7565e-18	-40.123	3284	1209	0.190184	6357	20933	70316,16783,21366,223332,69940,74732,12389,15467,68197,338365,235504,66713,235574,52392,235661,67843,11841,71169,21871,68682,77128,20913,16573,74412,241113,235442,11487,70349,27411,106393,16410,238123,68581,192197,236293,12053,14178,18704,66874,12729,20910,54122,13858,76959,108655,11982,17777,67602,63954,237504,338337,18174,76582,74152,105835,26413,56551,65113,30056,14772,17149,12869,11974,17113,…	Ndufab1,Lamp1,Slc6a6,Ranbp3l,Exoc1,Stx11,Cav1,Eif2ak1,Ndufc2,Slc41a2,Slc17a5,Actr2,Atp2c1,D1Ertd622e,Dync1li1,Slc35a4,Arf2,Nbas,Atp6v0a2,Slc44a2,Crebrf,Stxbp4,Kif5b,Gle1,Prkag3,Rab8b,Adam10,Copb1,Slc14a2,Srl,Itgav,Cog5,Tmed10,Bcas3,Slc22a29,Bcl6,Fgf7,Pik3c2a,Ncbp3,Clns1a,Stxbp1,Uevld,Eps15,Chmp5,Foxp1,Atp10a,Mttp,Necap1,Rbp7,Rassf9,Cog3,Slc11a2,Ipo11,Stra6l,Sgsm3,Mapk1,Txn2,Ndfip1,Timm9,Grk4,Mago…
GO:0045935	positive regulation of nucleobase-containing compound metabolic process	1.12555e-17	-39.0257	1624	648	0.101935	6357	20933	12454,14815,12545,13992,69726,192657,12652,30046,11516,20588,54713,23849,382056,13018,142980,58172,320790,105787,68799,59125,18741,18109,28000,22385,72103,93836,18046,66894,22026,69743,66266,14186,105590,20922,12461,18712,52463,23892,52915,22788,12566,16973,15212,234219,74322,71514,16909,72567,26395,13666,12013,21420,140858,378435,13492,211151,233060,225160,72754,67459,229700,17258,11863,12465,66…	Ccnk,Nr3c1,Cdc7,Khdrbs3,Smyd3,Ell2,Chga,Zfp292,Adcyap1,Smarcc1,Fezf2,Klf6,Crtc1,Ctcf,Tlr3,Sertad2,Chd7,Prkaa1,Rgmb,Nek7,Pitx2,Mycn,Prpf19,Baz1b,Aplf,Rnf111,Nfyc,Wwp2,Nr2c2,Casz1,Eapp,Fgfr4,Zfp957,Supt4a,Cct2,Pim1,Tet1,Grem1,Zmiz2,Zp3,Cdk2,Lrp5,Hexb,Helt,Cxxc1,Sfpq,Lmo2,Bclaf1,Map2k1,Eif2ak3,Bach1,Tfap2c,Wdr5,Mafa,Drd5,Churc1,Zfp382,Thoc1,Arhgef10l,Nvl,Rbm15,Mef2a,Arnt,Cct5,Smarcd3,Bmpr1a,Slf1,Zbt…
GO:0051173	positive regulation of nitrogen compound metabolic process	1.44285e-17	-38.7773	1727	683	0.107441	6357	20933	21834,14281,268697,241066,56706,23988,68010,26416,74434,207785,381305,15387,69219,19042,75812,319801,56380,22278,56501,66354,11303,21951,72135,55994,110809,15900,12428,17355,232560,381022,67040,21417,22780,18028,75420,14573,13982,12394,12554,217351,24074,14236,216825,104263,226641,56347,12162,72278,22038,170930,11745,19055,24088,23938,231130,20586,71093,19883,69585,69263,107823,192170,72162,68142…	Thrb,Fos,Ccnb1,Carf,Ccnl1,Pin1,Bambi,Mapk14,Sohlh2,Csrnp2,Rc3h1,Hnrnpk,Ddah1,Ppm1a,Tasp1,Tigar,Arid3b,Usf1,Elf4,Snw1,Abca1,Tnks,Pygo1,Smad9,Srsf1,Irf8,Ccna2,Aff1,Caprin2,Kmt2d,Ddx17,Zeb1,Ikzf3,Nfib,Secisbp2,Gdnf,Esr1,Runx1,Cdh13,Tnrc6c,Taf7,Foxn2,Usp22,Kdm3a,Atf6,Eif3c,Bmp7,Ccpg1,Plscr1,Sumo2,Anxa3,Ppp3ca,Tlr2,Map2k5,Tnip2,Smarca4,Atoh8,Rora,Hfe2,Rfc3,Whsc1,Eif4a3,Dhx36,Ino80,Mamstr,Myf6,Cct4,Cno…
GO:0048518	positive regulation of biological process	6.71019e-17	-37.2403	5067	1777	0.279534	6357	20933	17931,16004,11480,11836,51869,72692,66362,56321,13000,238722,67738,226407,17764,93687,83431,217069,12466,328108,77037,226551,268903,13861,192193,140792,14245,68188,17295,68428,13132,78783,67694,74011,225131,52690,69068,103806,51886,231148,72739,103583,14371,15525,70568,239719,19290,11785,11843,28019,51792,19826,114714,12161,212167,70891,105782,14645,226169,78600,433693,55982,320713,20347,74427,13…	Ppp1r12a,Igf2r,Acvr2a,Araf,Rif1,Hnrnpll,Exosc3,Aatf,Csnk2a2,Zfp72,Ppid,Rab3gap1,Mtf1,Csnk1a1,Ndel1,Trim25,Cct6a,Fam179b,Mrap,Suco,Nrip1,Epx,Edem1,Colec12,Lpin1,Sympk,Met,Steap3,Dab2,Brpf1,Ift74,Slc25a27,Wac,Setd3,1810011O10Rik,Maml1,Fubp1,Ablim2,Zkscan3,Fbxw11,Fzd9,Hspa4,Cpne3,Mkl2,Pura,Apbb1,Arf4,Ing4,Ppp2r1a,Rnps1,Rad51c,Bmp6,Gsap,Spdya,Scrib,Glul,Pprc1,Pde6h,Akirin2,Paxip1,Mysm1,Sema3b,Eaf1,Ct…
GO:0030163	protein catabolic process	8.81221e-17	-36.9678	528	250	0.0393267	6357	20933	235323,14084,59026,73469,67345,81004,20437,108159,68497,22123,226098,224836,229445,58230,74007,50933,216825,103583,68867,52323,12234,70247,19167,104831,74996,223455,327799,71745,94253,448987,216080,67338,76454,100763,19063,67819,26442,224170,192193,19358,105193,59025,217069,100037258,68031,66887,329908,22217,224826,66413,110616,208198,23802,268291,15185,17463,72607,69807,26889,18571,26440,27681,2…	Usp28,Faf1,Huwe1,Rnf38,Herc4,Tbl1xr1,Siah1a,Ubxn8,Arel1,Psmd3,Hectd2,Usp49,Ctso,Rnf8,Btbd11,Uchl3,Usp22,Fbxw11,Rnf122,Klhl7,Btrc,Psmd1,Psma3,Ptpn23,Usp47,March6,Usp44,Cul2,Hecw1,Fbxl7,Ube2d1,Rffl,Fbxo31,Ube3c,Ppt1,Derl1,Psma5,Dzip3,Edem1,Rad23a,Nhlrc1,Usp14,Trim25,Dnajc3,Rnf146,Lonp2,Usp24,Usp12,Ubr2,Psmd6,Atxn3,Btbd2,Amfr,Rnf217,Hdac6,Psmd7,Usp13,Trim32,Cln8,Pdcd6ip,Psma1,Snf8,Usp1,Ube2j2,Gan,Cd…
GO:0034622	cellular macromolecular complex assembly	1.20367e-16	-36.656	616	283	0.0445179	6357	20933	240283,69241,14007,12615,353190,20103,76826,14083,66578,57905,67148,99237,211323,104248,193116,107197,22384,238799,219103,78610,76499,18983,328110,108013,15078,72787,72193,328572,319159,19363,69077,69666,22184,14105,54411,104015,231430,66929,56758,103733,78688,20643,319151,216705,54633,20463,93757,66471,15519,68493,66603,67239,72171,27366,72795,50709,22319,12808,66448,67070,21814,67242,12457,5641…	Dmxl1,Polr2d,Celf2,Cenpa,Edc3,Rps5,Nubpl,Ptk2,Mis18a,Isy1,Fam103a1,Tm9sf4,Nrg1,Cabin1,Slu7,Uqcc3,Eif4h,Tnpo1,Cenpj,Uvrag,Clasp2,Cnot7,Prpf39,Celf4,H3f3a,Ndc1,Scaf11,Ep300,Hist1h4j,Rad51b,Psmd11,Psmg4,Zrsr2,Srsf10,Atp6ap1,Synj1,Cox18,Asf1b,Mbnl1,Tubg1,Nol3,Snrpe,Hist1h3e,Clint1,Pqbp1,Cox7a2l,Immp2l,Anp32e,Hsp90aa1,Ndufaf4,Gemin2,Rpf2,Shq1,Txnl4a,Ttc19,Hist1h1e,Vamp3,Cobl,Mrpl20,Lsm14a,Tgfbr3,Gemin…
GO:0051726	regulation of cell cycle	1.36428e-16	-36.5307	838	365	0.057417	6357	20933	27214,12545,18004,17685,12454,12236,68549,230126,234736,68193,108961,68729,17684,19090,59126,11516,14056,229543,77744,17535,19878,12235,28000,11787,72611,218914,73754,56208,20460,17120,225182,67941,12537,26951,225326,12914,22404,12366,77011,13197,12566,215351,20779,52696,219158,16973,14365,15468,105837,103573,22418,244329,18712,21749,226591,108000,26395,109113,14208,214498,71514,227937,214444,264…	Dbf4,Cdc7,Nek1,Msh2,Ccnk,Bub1b,Sgol2a,Shb,Rfwd3,Rpl24,E2f8,Trim37,Cited2,Prkdc,Nek6,Adcyap1,Ezh2,Ints3,Bora,Mre11a,Rock2,Bub1,Prpf19,Apbb2,Zfp655,Wapl,Thap1,Becn1,Stil,Mad1l1,Rbbp8,Rps27l,Cdk11b,Zw10,Pik3c3,Crebbp,Wiz,Casp2,Ticrr,Gadd45a,Cdk2,Senp6,Src,Zwint,Ccar2,Lrp5,Fzd3,Prmt2,Mtbp,Xpo1,Wnt5a,Mcph1,Pim1,Terf1,Tiprl,Cenpf,Map2k1,Uhrf2,Ppm1g,Cdc73,Sfpq,Pkp4,Cdk5rap2,Cdk8,Prkacb,Larp7,Camk2d,Nano…
GO:0007067	mitotic nuclear division	2.45186e-16	-35.9445	350	179	0.0281579	6357	20933	233276,52206,60344,240641,67037,23922,208718,71819,56505,70218,83560,52563,67166,26934,28193,226026,18003,18472,68724,67117,12450,224023,268697,26886,108907,12237,20479,19357,68942,71782,50850,56249,12757,12452,12532,12428,72124,218210,21951,259279,381293,67733,217718,213582,68743,67139,448987,22367,12626,69556,101994,17222,73738,327799,219072,76464,217653,50523,54141,11789,229776,69928,51792,235…	Tubgcp5,Anapc4,Fign,Kif20b,Pmf1,Jtb,Dis3l2,Kif23,Ruvbl1,Kif18b,Tex14,Cdc23,Arl8b,Racgap1,Reep3,Smc5,Nedd9,Pafah1b1,Arl8a,Dynlt3,Ccng1,Klhl22,Ccnb1,Cenph,Nusap1,Bub3,Vps4b,Rad21,Chmp2b,Ankle2,Spast,Actr8,Clta,Ccng2,Cdc25c,Ccna2,Seh1l,Nup153,Tnks,Tubgcp3,Kif14,Itgb3bp,Nek9,Map9,Anln,Mis12,Fbxl7,Vrk1,Cetn3,Bod1,Champ1,Anapc1,Haus7,Usp44,Haus4,Knl1,Mis18bp1,Lats2,Spag5,Apc,Cdc14a,Apitd1,Ppp2r1a,Dync1…
GO:0006259	DNA metabolic process	2.62707e-16	-35.8755	619	283	0.0445179	6357	20933	237877,117599,97827,227099,330554,78610,67241,50762,56878,320209,100710,233545,17219,106344,13368,72836,14375,15289,70238,71726,21976,56456,50755,20492,20184,66647,70681,19363,22687,106052,63830,66165,108686,57321,214133,13078,23942,109275,56210,22224,22590,26447,319583,18393,66143,72544,13433,27354,229512,19704,14051,78903,17688,99890,15574,319955,13990,83561,14050,12572,19891,22592,75178,12006,…	Atad5,Helb,Exd2,Pms1,Fan1,Uvrag,Smc6,Fbxo6,Rbms1,Ddx11,Pds5b,Emsy,Mcm6,Rfc4,Dffb,Pot1b,Xrcc6,Hmgb1,Rnf168,Smug1,Top3b,Actl6a,Fbxo18,Slbp,Uimc1,Ndnl2,Fam175a,Rad51b,Zpr1,Fbxo4,Kcnq1ot1,Bccip,Ccdc88a,Terf2ip,Tet2,Cyp1b1,Mta2,Actr5,Rev1,Usp10,Xpa,Poli,Lig4,Orc2,Eef1e1,Exosc6,Dnmt1,Nbn,Smg5,Upf1,Eya4,Wrnip1,Msh6,Prmt6,Hus1,Ercc6,Smarcad1,Tdrd1,Eya3,Cdk7,Rpa2,Ercc5,Meiob,Axin2,Rfc1,Xrcc1,Rev3l,Mlh1,Vp…
GO:0051254	positive regulation of RNA metabolic process	4.23267e-16	-35.3985	1387	558	0.0877773	6357	20933	74322,71514,234219,72567,16909,21420,12013,26395,13666,211151,140858,378435,18712,52463,23892,105590,20922,12566,52915,22788,16973,15212,66993,12166,75079,67367,19184,233060,225160,72754,229700,11863,17258,30046,11516,20588,13992,69726,192657,23849,13018,382056,54713,58172,142980,12454,14815,22385,93836,22026,66894,18046,66266,69743,320790,68799,18741,28000,18109,12916,18291,12023,98053,69228,179…	Cxxc1,Sfpq,Helt,Bclaf1,Lmo2,Tfap2c,Bach1,Map2k1,Eif2ak3,Churc1,Wdr5,Mafa,Pim1,Tet1,Grem1,Zfp957,Supt4a,Cdk2,Zmiz2,Zp3,Lrp5,Hexb,Smarcd3,Bmpr1a,Zbtb49,Paxbp1,Psmc5,Zfp382,Thoc1,Arhgef10l,Rbm15,Arnt,Mef2a,Zfp292,Adcyap1,Smarcc1,Khdrbs3,Smyd3,Ell2,Klf6,Ctcf,Crtc1,Fezf2,Sertad2,Tlr3,Ccnk,Nr3c1,Baz1b,Rnf111,Nr2c2,Wwp2,Nfyc,Eapp,Casz1,Chd7,Rgmb,Pitx2,Prpf19,Mycn,Crem,Nobox,Barx2,Gtf2f1,Zfp746,Myo6,Zfp1…
GO:0048193	Golgi vesicle transport	1.57882e-15	-34.0821	205	117	0.0184049	6357	20933	78891,67378,214895,58244,53334,104303,246738,50850,56041,27277,19325,67804,240756,66191,107338,54160,67727,225651,17846,50797,53612,72108,68505,76332,22135,50771,338337,93835,77254,213827,53611,78287,22319,11980,70028,66890,78232,12068,18760,226541,71116,12282,11736,74051,66460,56418,54214,20336,68365,60409,53330,11842,50907,217517,17274,231580,75964,98710,11765,19346,238123,210148,208647,68581,1…	Scyl1,Bbs2,Lman2l,Stx6,Gosr1,Arl1,Dnajc28,Spast,Uso1,Golga5,Rab10,Snx2,Klhl12,Ier3ip1,Gbf1,Copg2,Stx17,Mppe1,Commd1,Copb2,Vti1b,Ddhd2,Vps51,Cog2,Tgoln2,Atp9b,Cog3,Amn,Yif1b,Arcn1,Vti1a,Rbsn,Vamp3,Atp8a1,Dopey2,Lman2,Trappc6b,Bet1,Prkd1,Klhl20,Stx18,Hyou1,Ankfy1,Steap2,Sys1,Ykt6,Golga4,Exoc4,Rab14,Trappc4,Vamp4,Arf3,Preb,Stxbp6,Rab8a,Gak,Trappc8,Rabif,Ap1g1,Rab6a,Cog5,Slc30a6,Creb3l2,Tmed10,Rab33b…
GO:1902589	single-organism organelle organization	2.07472e-15	-33.809	1322	532	0.0836873	6357	20933	233335,76568,381760,50850,17169,19726,68328,19305,18645,72421,56471,11793,77579,73689,68943,72776,223701,60344,12068,26934,208718,72972,71819,58800,70218,76108,78757,319876,11736,228564,72507,108907,52906,11765,269400,67451,110616,73668,69581,52028,60530,223593,22350,27428,72400,114896,70737,234663,72018,70549,100169,67414,22437,104831,73738,219072,227753,71769,338359,21974,101994,54141,56384,222…	Synm,Ift46,Ssbp1,Spast,Mark3,Rfx3,Rab13,Pex5,Pfn2,Ttc30b,Stmn4,Atg5,Myh10,Bloc1s2,Pink1,Sass6,Mkl1,Fign,Bet1,Racgap1,Dis3l2,Ccser2,Kif23,Trpm7,Kif18b,Rap2a,Rictor,Cobll1,Ankfy1,Frmd5,Dzip1l,Nusap1,Ahi1,Ap1g1,Rtel1,Pkp2,Atxn3,Ttc21b,Rhou,Bbs1,Fignl1,Washc5,Ezr,Shroom3,Pinx1,Afg3l1,Cgn,Dync1li2,Fundc1,Tln2,Phactr4,Mfn1,Xirp1,Ptpn23,Haus7,Haus4,Gsn,Bbs10,Supv3l1,Top2b,Champ1,Spag5,Letm1,Dpysl3,Kif3a…
GO:1901564	organonitrogen compound metabolic process	2.22123e-15	-33.7407	1403	560	0.0880919	6357	20933	13649,19286,240028,18573,14719,73158,66521,108853,237926,18575,232449,216134,76898,226414,16434,13178,12183,18597,17768,224045,66258,79455,66152,66725,14660,211347,100039707,319195,13667,50767,20397,69527,11975,14775,67795,107227,328780,223691,12858,67281,94061,12916,67452,58250,98258,229363,104923,75986,230861,21881,241447,108147,56412,66590,229317,56442,170718,70456,54375,66121,66514,268566,172…	Egfr,Pts,Lnpep,Pde1a,Got2,Larp1,Rwdd1,Mtrf1l,Rsad1,Pde1c,Dera,Pdxk,B3gat1,Dars,Itpa,Dck,Bpgm,Pdha1,Mthfd2,Eif2b5,Mrps17,Pdcl2,Uqcr10,Lrrk2,Gls,Pank3,Mthfsl,Rpl17,Eif2b4,Pnpla6,Sgpl1,Mrps9,Atp6v0a1,Gpx1,Rnls,Macrod1,Prss34,Eif3l,Cox5a,Rpl37,Mrpl1,Crem,Pnpla8,Chst11,Txndc9,Gmps,Adi1,Agmat,Eif4g3,Tkt,Cers6,Atic,Noa1,Farsa,Eif2a,Serinc1,Idh3b,Mpc2,Azin1,Chchd1,Asrgl1,Gphn,Mecp2,Gsto1,Adk,Yae1d1,Atp5k…
GO:0051128	regulation of cellular component organization	3.10614e-15	-33.4054	2318	870	0.136857	6357	20933	68810,50911,232441,12323,15182,15499,214855,17918,11977,235661,60321,94190,16551,107035,20239,20932,53380,71409,20742,12389,66713,103967,243725,98496,226422,241568,73674,56807,17260,66917,20910,381921,103199,19063,76959,108655,11538,93730,19345,20947,73086,329165,19230,74205,53872,16410,192197,12649,12053,99982,14219,229707,18795,74412,16573,13347,67052,71902,11487,18430,235442,18286,21898,19400,…	Nexn,Exosc9,Rerg,Camk2b,Hdac2,Hsf1,Arid5a,Myo5a,Atp7a,Dync1li1,Wbp11,Ophn1,Kif11,Fbxo38,Atxn2,Surf4,Psmd10,Fmnl2,Sptbn1,Cav1,Actr2,Dnm3,Ppp1r9a,Pid1,Rab29,Lrrc4c,Wdr75,Scamp5,Mef2c,Chordc1,Stxbp1,Taok2,Fig4,Ppt1,Chmp5,Foxp1,Adnp,Lztfl1,Rab5c,Swap70,Rps6ka5,Abi2,Twf1,Acsl3,Caprin1,Itgav,Bcas3,Chek1,Bcl6,Kdm1a,Ctgf,Strip1,Plcb1,Gle1,Kif5b,Dffa,Ndc80,Cand1,Adam10,Oxtr,Rab8b,Odf2,Tlr4,Rapsn,Nos1,Adgr…
GO:0034660	ncRNA metabolic process	3.95994e-15	-33.1625	396	194	0.0305175	6357	20933	328092,50912,19941,66044,108673,67115,65961,28088,192657,229543,27393,244141,140546,110960,66583,18572,100019,105372,207615,66254,74753,57316,56200,70683,68045,214150,20823,69786,72656,70285,94223,66628,66161,209584,69639,78651,14300,70047,67276,212728,67222,18130,271842,320790,72133,71807,67619,66381,66663,233802,20115,68979,14911,72544,69499,69606,106298,67239,105148,66637,382137,72181,109075,2…	Dtd2,Exosc10,Rpl26,Dtd1,Ccdc86,Rpl14,Utp3,Rtcb,Ell2,Ints3,Mrpl39,Nars2,Eri3,Tars,Exosc1,Pdcd11,Mdn1,Utp15,Wdr37,Dimt1,Trmo,C1d,Ddx21,Utp20,2700060E02Rik,Ago3,Ssb,Tprkb,Ints8,Rpf1,Dgcr8,Thg1l,Pop4,Tyw3,Exosc8,Lsm6,Frg1,Trnt1,Eri1,Tarbp1,Srfbp1,Ints6,Rpusd2,Chd7,Trub1,Tars2,Nob1,Rnf113a2,Uba5,Thumpd1,Rps7,Nol11,Thumpd3,Exosc6,Tsr2,Mtfmt,Rrn3,Rpf2,Iars,Tsen15,Fdxacb1,Nsun4,Exosc4,Mars2,Rnmtl1,Hars2,…
GO:0006357	regulation of transcription from RNA polymerase II promoter	4.98606e-15	-32.9321	1755	679	0.106811	6357	20933	22284,106389,23897,114142,17973,58202,215031,12393,229285,19015,104382,21809,74164,68045,17975,246103,231991,12224,12914,228913,18193,50873,244373,52615,11482,20481,69792,12142,18771,15312,22025,15404,23893,231070,11569,108961,17684,19090,56233,223773,319974,70252,75302,319757,238803,11910,26380,242466,15251,12447,17765,19291,208258,14063,27374,93759,56198,70601,75725,15214,18519,19822,20585,1742…	Usp9x,Eaf2,Hax1,Foxp2,Nck1,Nelfb,Vgll2,Runx2,Spg20,Ppard,Barhl2,Tgfb3,Nfx1,2700060E02Rik,Ncl,Atxn7,Creb5,Klf5,Crebbp,Zfp217,Nsd1,Park2,Erlin2,Suz12,Acvrl1,Ski,Med6,Prdm1,Pknox1,Hmgn1,Nr2c1,Hoxa7,Grem2,Insig1,Aebp2,E2f8,Cited2,Prkdc,Hdac7,Zbed4,Auts2,Jpx,Asxl2,Smo,Zfp366,Atf3,Esrrb,Zfp462,Hif1a,Ccne1,Mtf2,Purb,Ankrd33,F2rl1,Prmt5,Sirt1,Heyl,Ecd,Phf14,Hey2,Kat2b,Rnf4,Hltf,Mnat1,Sdpr,Cebpg,Wdr61,Cam…
GO:0033365	protein localization to organelle	1.53868e-14	-31.8053	494	230	0.0361806	6357	20933	53869,56327,75901,71446,104303,110750,69821,66169,233726,64009,56417,53317,66624,105377,70160,71177,72930,16328,12190,53612,20963,70699,30931,69597,50771,76378,244329,27058,20813,24067,66212,105837,103573,271564,53611,69754,27057,66384,14841,56724,235320,53421,382030,66460,16646,12121,67669,54214,19386,231580,15519,67437,195236,320938,19346,239839,93757,71844,218914,21809,230597,19338,50878,74682…	Rab11a,Arl2,Dcp1a,Wrb,Arl1,Cse1l,Mterf4,Tomm7,Ipo7,Syne1,Adar,Plrg1,Spcs2,Slf1,Vps36,Asun,Ppp2r2b,Cep250,Brca2,Vti1b,Syk,Nup205,Tor1a,Afg3l2,Atp9b,Ropn1,Mcph1,Srp9,Srp14,Srp54a,Sec61b,Mtbp,Xpo1,Vps13a,Vti1a,Fbxo7,Ncoa4,Srp19,Gsg2,Cript,Zbtb16,Sec61a1,Cnep1r1,Sys1,Kpna1,Bicd1,Hikeshi,Golga4,Ranbp2,Gak,Hsp90aa1,Ssr3,Pom121l2,Tnpo3,Rab6a,Ccdc14,Immp2l,Nupl1,Wapl,Tgfb3,Zfyve9,Rab33b,Stag3,Wdr35,Nup21…
GO:0034470	ncRNA processing	1.66785e-14	-31.7247	302	155	0.0243826	6357	20933	72656,69786,70285,66628,94223,209584,66161,66254,57316,74753,56200,70683,68045,214150,20823,67619,72133,271842,320790,66663,66381,233802,78651,69639,70047,14300,67276,67222,212728,18130,67115,65961,28088,229543,50912,19941,108673,207615,105372,140546,18572,66583,100019,227522,217995,70422,59014,66966,93759,72085,101861,114615,66369,78581,18148,69163,73681,98956,69237,68291,56417,23992,68736,78890…	Ints8,Tprkb,Rpf1,Thg1l,Dgcr8,Tyw3,Pop4,Dimt1,C1d,Trmo,Ddx21,Utp20,2700060E02Rik,Ago3,Ssb,Nob1,Trub1,Rpusd2,Chd7,Uba5,Rnf113a2,Thumpd1,Lsm6,Exosc8,Trnt1,Frg1,Eri1,Srfbp1,Tarbp1,Ints6,Rpl14,Utp3,Rtcb,Ints3,Exosc10,Rpl26,Ccdc86,Wdr37,Utp15,Eri3,Pdcd11,Exosc1,Mdn1,Rpp38,Heatr1,Ints2,Rrs1,Trit1,Sirt1,Osgepl1,Ints4,Elac1,Dus2,Utp23,Npm1,Mrpl44,Trmt11,Nat10,Gtpbp4,Mto1,Adar,Prkra,Tyw5,Trmt44,Trmt10a,Tfb…
GO:0051052	regulation of DNA metabolic process	2.0006e-14	-31.5427	373	183	0.0287872	6357	20933	218914,50755,21809,20184,219150,50754,70681,15289,70238,17535,59125,68067,57321,11482,26407,18950,77011,13078,72103,22404,21454,18590,108686,63830,51810,20375,77805,12301,17685,19252,117599,12545,237877,21853,236904,12981,22160,22596,106344,66578,72836,320209,16476,108961,244694,18148,225160,18761,67459,14050,98956,19891,13990,16337,69237,68968,71991,105377,66131,237107,26419,12465,17350,12190,56…	Wapl,Fbxo18,Tgfb3,Uimc1,Hmbox1,Fbxw7,Fam175a,Hmgb1,Rnf168,Mre11a,Nek7,Mrnip,Terf2ip,Acvrl1,Map3k4,Pnp,Ticrr,Cyp1b1,Aplf,Wiz,Tcp1,Pdgfa,Ccdc88a,Kcnq1ot1,Hnrnpu,Spi1,Esco1,Cacybp,Msh2,Dusp1,Helb,Cdc7,Atad5,Timeless,Klhl15,Csf2,Twist1,Xrcc5,Rfc4,Mis18a,Pot1b,Ddx11,Jun,E2f8,Kdm4d,Npm1,Thoc1,Prkcq,Nvl,Eya3,Nat10,Rpa2,Smarcad1,Insr,Gtpbp4,Cdan1,Ercc8,Slf1,Tipin,Gnl3l,Mapk8,Cct5,Mlh1,Brca2,Ylpm1,Map2k4,…
GO:0000209	protein polyubiquitination	2.17996e-14	-31.4569	162	96	0.0151015	6357	20933	56736,68366,74132,207304,75841,384309,56515,319817,52206,22194,66053,22214,108660,19720,67118,74493,226541,52563,209462,20585,19822,70097,71779,22129,109331,80751,51902,54484,21951,218215,109910,22215,268281,232539,93765,30945,11797,74315,231600,218793,20821,12021,67128,270627,17999,22034,70620,71991,217558,59026,109161,58230,22193,67664,53323,12234,70797,68867,103583,17222,216080,16396,223455,83…	Rnf14,Tmem129,Rnf6,Hectd1,Rnf139,Trim56,Rnf138,Rc3h2,Anapc4,Ube2e1,Ppil2,Ube2h,Rnf187,Trim27,Bfar,Tnks2,Klhl20,Cdc23,Hace1,Hltf,Rnf4,Sash1,March8,Ttc3,Rnf20,Rnf34,Rnf24,Mkrn1,Tnks,Rnf144b,Zfp91,Ube3a,Shprh,Klhl42,Ube2n,Rnf19a,Birc2,Rnf145,Chfr,Ube2e2,Trim21,Bard1,Ube2g1,Taf1,Nedd4,Traf6,Ube2v2,Ercc8,G2e3,Huwe1,Ube2q2,Rnf8,Ube2e3,Rnf125,Ube2k,Btrc,Ankib1,Rnf122,Fbxw11,Anapc1,Ube2d1,Itch,March6,Ned…
GO:1902680	positive regulation of RNA biosynthetic process	2.26284e-14	-31.4196	1334	531	0.08353	6357	20933	20585,19822,17420,18519,15214,70601,12190,56198,93759,170740,14063,18148,75901,17765,15251,242466,16337,26380,65973,11910,67923,214444,106298,214498,21425,80720,60611,12879,68979,56222,22411,22418,234959,17864,100072,230753,15468,66317,12611,20779,20324,21812,69792,20481,11482,244373,50873,18193,12914,12224,231991,246103,17975,68045,104382,21809,19015,12393,215031,17973,23897,106389,319757,67781,…	Hltf,Rnf4,Mnat1,Kat2b,Hey2,Ecd,Brca2,Heyl,Sirt1,Zfp287,F2rl1,Npm1,Dcp1a,Mtf2,Hif1a,Zfp462,Insr,Esrrb,Asph,Atf3,Eloc,Cdk5rap2,Rrn3,Cdc73,Tfeb,Pbx4,Foxj2,Cys1,Nol11,Cited4,Wnt11,Wnt5a,Med17,Mybl1,Camta1,Thrap3,Prmt2,Wdr61,Cebpg,Src,Sdpr,Tgfbr1,Med6,Ski,Acvrl1,Erlin2,Park2,Nsd1,Crebbp,Klf5,Creb5,Atxn7,Ncl,2700060E02Rik,Barhl2,Tgfb3,Ppard,Runx2,Vgll2,Nck1,Hax1,Eaf2,Smo,Ilf2,Asxl2,Jpx,Auts2,Ing2,Cited…
GO:1903508	positive regulation of nucleic acid-templated transcription	2.55496e-14	-31.2982	1329	529	0.0832154	6357	20933	18148,14063,17765,75901,242466,15251,11910,65973,16337,26380,18519,20585,17420,19822,70601,15214,56198,12190,170740,93759,234959,22411,22418,56222,12611,66317,15468,17864,230753,100072,21812,20324,20779,67923,214498,214444,106298,60611,12879,80720,21425,68979,21809,104382,12393,215031,19015,17973,106389,23897,11482,20481,69792,18193,50873,244373,68045,17975,246103,231991,12224,12914,231070,15404,…	Npm1,F2rl1,Mtf2,Dcp1a,Zfp462,Hif1a,Atf3,Asph,Insr,Esrrb,Kat2b,Hltf,Mnat1,Rnf4,Ecd,Hey2,Heyl,Brca2,Zfp287,Sirt1,Med17,Wnt11,Wnt5a,Cited4,Cebpg,Wdr61,Prmt2,Mybl1,Thrap3,Camta1,Tgfbr1,Sdpr,Src,Eloc,Cdc73,Cdk5rap2,Rrn3,Foxj2,Cys1,Pbx4,Tfeb,Nol11,Tgfb3,Barhl2,Runx2,Vgll2,Ppard,Nck1,Eaf2,Hax1,Acvrl1,Ski,Med6,Nsd1,Park2,Erlin2,2700060E02Rik,Ncl,Atxn7,Creb5,Klf5,Crebbp,Insig1,Hoxa7,Pknox1,Fzd7,Trip4,Smo,…
GO:0045893	positive regulation of transcription, DNA-templated	2.55496e-14	-31.2982	1329	529	0.0832154	6357	20933	77578,17342,12455,328365,14370,22697,51813,13549,14634,70380,74112,54367,17341,18020,319955,60411,93760,15904,14013,80280,233904,71175,68016,57432,22629,21422,15505,14536,14531,17354,18986,16870,338523,223870,22083,20375,18983,54394,211323,11819,230738,56458,54194,14375,14428,320209,20683,213054,17700,19885,110157,74370,226442,15289,23942,12985,65100,77110,26405,15407,66197,23872,24068,170767,180…	Bcl9,Mitf,Ccnt1,Zmiz1,Fzd8,Zscan21,Ccnc,Dyrk1b,Gli3,Mospd1,Usp16,Zfp326,Bhlha15,Nfatc2ip,Ercc6,Cenpk,Arid1a,Id4,Mecom,Cdk5rap3,Setd1a,Nipbl,Murc,Zc3h8,Ywhah,Tfcp2,Hsph1,Nr6a1,Gcm1,Mllt10,Pou2f1,Lhx2,Kdm7a,Senp1,Ctr9,Spi1,Cnot7,Crlf3,Nrg1,Nr2f2,Zc3h12a,Foxo1,Akap8l,Xrcc6,Galr2,Ddx11,Sp1,Gabpb2,Mstn,Rorc,Raf1,Rptor,Zfp281,Hmgb1,Mta2,Csf3,Zic5,Gpbp1l1,Map3k2,Hoxb1,Cks2,Ets2,Sra1,Rfxap,Nfia,Ror2,Coq7…
GO:0048285	organelle fission	2.97066e-14	-31.1474	507	234	0.0368098	6357	20933	12615,109359,100710,69260,212307,22390,66578,56428,75786,59126,19765,235072,21853,17685,54194,18004,232679,68193,22137,239122,89867,12454,18000,59046,67121,76499,77053,12236,68549,242521,69957,66197,19363,12617,26951,56208,72787,100732,225182,17120,20460,67064,217031,70675,225745,103733,227720,74187,12235,105988,22284,77744,17535,228421,66296,218914,110033,74107,12531,30939,12488,50878,237911,738…	Cenpa,Fam175b,Pds5b,Ing2,Mapre2,Wee1,Mis18a,Mtch2,Ckap5,Nek6,Ralbp1,Sept7,Timeless,Msh2,Akap8l,Nek1,Zc3hc1,Rpl24,Ttk,Setdb2,Sec16b,Ccnk,Sept2,Arpp19,Mastl,Clasp2,Sun1,Bub1b,Sgol2a,Klhl9,Cdc16,Cks2,Rad51b,Cenpc1,Zw10,Becn1,Ndc1,Mapre3,Rbbp8,Mad1l1,Stil,Chmp1b,Tada2a,Vcpip1,Haus1,Tubg1,Nup214,Katnb1,Bub1,Espl1,Usp9x,Bora,Mre11a,Kif18a,Haus2,Wapl,Kif22,Cep55,Cdc25b,Pttg1,Cd2ap,Stag3,Brip1,Kif2c,Ska2…
GO:0071826	ribonucleoprotein complex subunit organization	3.16672e-14	-31.0835	181	104	0.0163599	6357	20933	69241,20239,101592,76366,81898,353190,14007,20103,320806,67097,236511,80913,66164,57905,67148,56422,100019,193116,22384,67994,233871,13424,56195,74778,108013,328110,27367,27756,68193,18983,66405,231386,72193,101739,229317,67941,214150,69902,20630,14105,70285,22184,53975,66410,68184,30946,12729,276919,16573,28000,56758,72614,26905,78688,20643,225215,13669,20085,54633,27275,67025,70767,20935,229937…	Polr2d,Atxn2,Efl1,Mtif3,Sf3b1,Edc3,Celf2,Rps5,Gfm2,Rps10,Ago1,Pum2,Nip7,Isy1,Fam103a1,Hbs1l,Mdn1,Slu7,Eif4h,Mrps11,Atxn2l,Dync1h1,Ptbp2,Rrp7a,Celf4,Prpf39,Rpl3,Lsm2,Rpl24,Cnot7,Mcts2,Ythdc1,Scaf11,Psip1,Eif2a,Rps27l,Ago3,Mrto4,Snrpc,Srsf10,Rpf1,Zrsr2,Ddx20,Mterf3,Denr,Abt1,Clns1a,Gemin4,Kif5b,Prpf19,Mbnl1,Pih1d2,Eif2s3x,Nol3,Snrpe,Rsl24d1,Eif3a,Rps19,Pqbp1,Nufip1,Rpl11,Prpf3,Surf6,Znhit6,Aar2,Cdc…
GO:0043043	peptide biosynthetic process	4.09108e-14	-30.8274	322	162	0.0254837	6357	20933	57808,66121,231279,78294,66410,68184,229317,19981,66590,56412,66405,230861,13669,225215,68028,26905,20085,27397,14694,229487,78523,107734,26987,20102,107045,320806,13684,109093,100042807,27370,56347,76366,24015,66242,101592,211666,27395,231326,94063,27367,75398,11837,27103,67008,67994,56422,27267,69955,67186,20088,23874,75705,16341,65967,226414,52535,66521,50776,100503670,75420,108853,231872,1024…	Rpl35a,Chchd1,Guf1,Rps27a,Mterf3,Denr,Eif2a,Rpl37a,Farsa,Noa1,Mcts2,Eif4g3,Eif3a,Rsl24d1,Rpl22l1,Eif2s3x,Rps19,Mrpl17,Rack1,Gatb,Mrpl9,Mrpl30,Eif4e2,Rps4x,Lars,Gfm2,Eif4e,Rars2,Eif3j2,Rps26,Eif3c,Mtif3,Abce1,Mrps16,Efl1,Mgst2,Mrpl15,Aasdh,Mrpl16,Rpl3,Mrpl32,Rplp0,Eif2ak4,Yae1d1,Mrps11,Hbs1l,Cars,Fars2,Rplp2,Rps24,Farsb,Eif4b,Eif3e,Eefsec,Dars,Mettl17,Rwdd1,Polg2,Rpl5,Secisbp2,Mtrf1l,Aimp2,Lars2,E…
GO:0010557	positive regulation of macromolecule biosynthetic process	4.32501e-14	-30.7718	1568	610	0.0959572	6357	20933	211673,17975,68045,18590,246103,231991,12914,12224,22404,50873,18193,26407,244373,11482,20481,69792,106389,23897,17973,13690,215031,12393,19015,104382,21809,14265,108961,19090,17684,69260,319974,70252,75302,67781,319757,18771,99011,14369,56404,15404,231070,67031,170740,93759,56198,12190,70601,15214,26419,18519,19822,20585,17420,11910,65973,26380,16337,242466,15251,17765,75901,14063,18148,17311,68…	Arfgef1,Ncl,2700060E02Rik,Pdgfa,Atxn7,Creb5,Crebbp,Klf5,Wiz,Park2,Nsd1,Map3k4,Erlin2,Acvrl1,Ski,Med6,Eaf2,Hax1,Nck1,Eif4g2,Vgll2,Runx2,Ppard,Barhl2,Tgfb3,Fmr1,E2f8,Prkdc,Cited2,Ing2,Auts2,Jpx,Asxl2,Ilf2,Smo,Pknox1,Pomt1,Fzd7,Trip4,Hoxa7,Insig1,Upf3a,Zfp287,Sirt1,Heyl,Brca2,Ecd,Hey2,Mapk8,Kat2b,Rnf4,Hltf,Mnat1,Atf3,Asph,Esrrb,Insr,Zfp462,Hif1a,Mtf2,Dcp1a,F2rl1,Npm1,Kitl,Nol11,Foxj2,Cys1,Pbx4,Tfeb,…
GO:0000280	nuclear division	4.65477e-14	-30.6983	477	222	0.0349221	6357	20933	20460,17120,225182,72787,100732,56208,66197,19363,26951,12617,242521,69957,70675,225745,217031,67064,17535,77744,22284,103733,227720,12235,74187,105988,237911,30939,74107,12531,12488,50878,218914,110033,228421,66296,212307,69260,22390,109359,12615,100710,59126,75786,66578,232679,18004,17685,54194,19765,235072,21853,12236,68549,18000,59046,67121,239122,12454,76499,77053,68193,22137,57434,105513,12…	Stil,Mad1l1,Rbbp8,Ndc1,Mapre3,Becn1,Cks2,Rad51b,Zw10,Cenpc1,Klhl9,Cdc16,Vcpip1,Haus1,Tada2a,Chmp1b,Mre11a,Bora,Usp9x,Tubg1,Nup214,Bub1,Katnb1,Espl1,Brip1,Pttg1,Cep55,Cdc25b,Cd2ap,Stag3,Wapl,Kif22,Kif18a,Haus2,Mapre2,Ing2,Wee1,Fam175b,Cenpa,Pds5b,Nek6,Ckap5,Mis18a,Zc3hc1,Nek1,Msh2,Akap8l,Ralbp1,Sept7,Timeless,Bub1b,Sgol2a,Sept2,Arpp19,Mastl,Setdb2,Ccnk,Clasp2,Sun1,Rpl24,Ttk,Xrcc2,Chmp7,Aspm,Ahctf1…
GO:0033043	regulation of organelle organization	5.40211e-14	-30.5494	999	412	0.0648104	6357	20933	76959,17295,19230,329165,20947,107047,328108,12466,192197,12649,226407,217232,83964,13000,16573,18795,67052,14219,59026,11789,213389,68810,12323,15182,20932,20239,53380,20742,227800,229776,52538,16551,100088,235661,26425,60321,216810,17128,98496,243725,66713,12389,66917,17260,99889,73674,78798,83946,18613,108903,67771,15381,21808,226151,330938,52575,54324,28113,74143,68524,63873,68857,19357,17165…	Chmp5,Met,Twf1,Abi2,Swap70,Psmg2,Fam179b,Cct6a,Bcas3,Chek1,Rab3gap1,Cdc27,Jam3,Csnk2a2,Kif5b,Plcb1,Ndc80,Ctgf,Huwe1,Apc,Prdm9,Nexn,Camk2b,Hdac2,Surf4,Atxn2,Psmd10,Sptbn1,Rabgap1,Cdc14a,Acaa2,Kif11,Rcc1,Dync1li1,Nubp1,Wbp11,Tom1l2,Smad4,Pid1,Ppp1r9a,Actr2,Cav1,Chordc1,Mef2c,Arfip1,Wdr75,Eml4,Phip,Pecam1,Tbcd,Arpc5,Hnrnpc,Tgfb2,Fam178a,Dixdc1,Trmt10c,Arhgef5,Tinf2,Opa1,Wipf2,Trpv4,Dtwd2,Rad21,Mapka…
GO:0006412	translation	5.85764e-14	-30.4684	303	154	0.0242253	6357	20933	19933,118451,19935,56040,20823,67941,71807,67204,28030,20090,20091,64656,59054,13690,66416,66475,19944,64657,67115,67427,69956,20103,214580,67891,27393,244141,19941,26451,217715,18521,68193,70354,110960,22384,68565,70223,66448,66399,211006,353242,16865,69163,98221,66407,68463,56284,272396,70560,69821,217869,353172,69606,94067,13666,20115,66845,13631,64658,114641,212679,20918,66143,13682,70791,689…	Rpl21,Mrps2,Mrpl23,Rplp1,Ssb,Rps27l,Tars2,Eif2s2,Gfm1,Rps29,Rps3a1,Mrps23,Mrps30,Eif4g2,Ndufa7,Rps23,Rpl29,Mrps10,Rpl14,Rps20,Ptcd3,Rps5,Pstk,Rpl4,Mrpl39,Nars2,Rpl26,Rpl27a,Eif2b2,Pcbp2,Rpl24,Secisbp2l,Tars,Eif4h,Mrps18a,Nars,Mrpl20,Tsfm,Sepsecs,Mrpl21,Eif2d,Mrpl44,Eif3m,Mrps15,Mrpl14,Mrpl19,Tarsl2,Wars2,Mterf4,Eif5,Gars,Mtfmt,Mrpl43,Eif2ak3,Rps7,Mrpl33,Eef2k,Mrps25,Rpl31,Mars2,Eif1,Eef1e1,Eif4a2…
GO:0022618	ribonucleoprotein complex assembly	6.77671e-14	-30.3227	171	99	0.0155734	6357	20933	66448,330361,75705,27374,67070,66810,57837,225929,110809,67242,29806,13046,12457,71713,53890,56417,67996,20901,69821,217869,16865,192196,100503670,12261,67025,229937,20935,70767,98985,381305,66603,68295,214498,67239,27366,12121,72171,72831,56505,72181,67229,66877,66978,229317,101739,72193,231386,66405,20630,69902,214150,67941,22184,53975,70285,14105,276919,12729,30946,66410,68184,72614,56758,2800…	Mrpl20,Gcfc2,Eif4b,Prmt5,Lsm14a,Rbm22,Eral1,Patl1,Srsf1,Gemin6,Limd1,Celf1,Noct,Cdc40,Sart3,Adar,Srsf6,Strap,Mterf4,Eif5,Eif2d,Luc7l2,Rpl5,C1qbp,Rpl11,Znhit6,Surf6,Prpf3,Clp1,Rc3h1,Gemin2,Aar2,Cdc73,Rpf2,Txnl4a,Bicd1,Shq1,Dhx30,Ruvbl1,Nsun4,Prpf18,Crnkl1,Luc7l,Eif2a,Psip1,Scaf11,Ythdc1,Mcts2,Snrpc,Mrto4,Ago3,Rps27l,Zrsr2,Ddx20,Rpf1,Srsf10,Gemin4,Clns1a,Abt1,Mterf3,Denr,Pih1d2,Mbnl1,Prpf19,Eif3a,R…
GO:0051301	cell division	7.84132e-14	-30.1768	450	211	0.0331918	6357	20933	12615,109359,74392,100710,69260,212307,22390,75786,59126,66578,14369,232679,12545,235072,21853,105278,18004,59046,239122,18000,67121,12454,76499,320165,84092,219103,12236,68549,109333,107829,100732,56208,17120,225182,19046,69957,242521,66197,21843,26951,12617,225326,67064,225745,59003,22284,11852,77744,11735,26920,102774,74187,12235,30939,74107,12531,229285,12488,237911,56431,66296,218914,66140,7…	Cenpa,Fam175b,Specc1l,Pds5b,Ing2,Mapre2,Wee1,Ckap5,Nek6,Mis18a,Fzd7,Zc3hc1,Cdc7,Sept7,Timeless,Cdk20,Nek1,Arpp19,Setdb2,Sept2,Mastl,Ccnk,Clasp2,Tacc1,Usp8,Cenpj,Bub1b,Sgol2a,Pkn2,Thoc5,Mapre3,Becn1,Mad1l1,Rbbp8,Ppp1cb,Cdc16,Klhl9,Cks2,Tial1,Zw10,Cenpc1,Pik3c3,Chmp1b,Haus1,Maea,Usp9x,Rhob,Bora,Ank3,Cntrl,Bbs4,Katnb1,Bub1,Pttg1,Cep55,Cdc25b,Spg20,Cd2ap,Brip1,Dstn,Haus2,Wapl,Ska2,Kif2c,Stmn1,Cenpw,Z…
GO:0010628	positive regulation of gene expression	8.53144e-14	-30.0924	1655	638	0.100362	6357	20933	208647,22781,20319,73713,20112,56046,27681,27056,67151,207165,69076,16653,17425,11911,16600,17878,74490,72162,68142,192170,69585,23938,20586,71093,231130,19883,19055,24088,22038,170930,12162,72278,56347,226641,104263,216825,14236,24074,13982,12394,12554,14573,75420,94245,18028,22780,381022,67040,21417,12428,17355,232560,55994,110809,67759,15900,72135,21951,66354,56501,22278,56380,19042,75812,5633…	Creb3l2,Ikzf4,Sfrp2,Rbm20,Rps6ka2,Uqcc1,Snf8,Irf5,Psmd9,Bptf,Triap1,Kras,Foxk1,Atf4,Klf4,Myf6,Mamstr,Dhx36,Ino80,Eif4a3,Hfe2,Map2k5,Smarca4,Atoh8,Tnip2,Rora,Ppp3ca,Tlr2,Plscr1,Sumo2,Bmp7,Ccpg1,Eif3c,Atf6,Kdm3a,Usp22,Foxn2,Taf7,Esr1,Runx1,Cdh13,Gdnf,Secisbp2,Dtnbp1,Nfib,Ikzf3,Kmt2d,Ddx17,Zeb1,Ccna2,Aff1,Caprin2,Smad9,Srsf1,Plgrkt,Irf8,Pygo1,Tnks,Snw1,Elf4,Usf1,Arid3b,Ppm1a,Tasp1,Pdcd5,Hnrnpk,Csrnp…
GO:0006281	DNA repair	1.04659e-13	-29.8881	386	186	0.0292591	6357	20933	17688,99890,56438,15574,319955,71514,27354,212377,18974,14051,19704,56515,78903,12013,319583,227525,66143,56210,22224,22590,26447,12566,73172,17420,20585,105377,19714,17350,12190,22592,269582,75178,19687,216965,57434,93759,21761,22594,18148,14050,218294,14088,69113,12572,382985,19891,13990,71991,22596,229543,14375,320209,19090,233545,100710,244694,330554,234736,67241,78610,77593,50762,72749,17685…	Msh6,Prmt6,Rbx1,Hus1,Ercc6,Sfpq,Nbn,Mms22l,Pole2,Eya4,Upf1,Rnf138,Wrnip1,Bach1,Lig4,Dclre1c,Eef1e1,Rev1,Usp10,Xpa,Poli,Cdk2,Exo5,Mnat1,Hltf,Slf1,Rev3l,Mlh1,Brca2,Ercc5,Clspn,Meiob,Rfc1,Taok1,Xrcc2,Sirt1,Morf4l1,Xrcc1,Npm1,Eya3,Cdc14b,Fancc,Alkbh3,Cdk7,Rrm2b,Rpa2,Smarcad1,Ercc8,Xrcc5,Ints3,Xrcc6,Ddx11,Prkdc,Emsy,Pds5b,Kdm4d,Fan1,Rfwd3,Smc6,Uvrag,Usp45,Fbxo6,Tonsl,Msh2,Cdc7,Pms1,Exd2,Exo1,Uchl5,Hmg…
GO:0042254	ribosome biogenesis	2.45514e-13	-29.0354	250	131	0.0206072	6357	20933	65961,67014,67115,20103,19941,108673,50912,234549,52521,68193,105372,207615,100019,140546,66583,18572,212508,66161,70285,70683,56200,67941,66254,57316,320790,67619,67222,230737,69639,78651,67276,14300,67239,69499,106298,229937,72544,20115,68979,72662,109075,67390,103573,72181,382137,237107,207704,217995,59014,71952,75593,93759,66448,18148,67459,98956,78581,224481,69821,69237,50911,66164,228889,67…	Utp3,Mina,Rpl14,Rps5,Rpl26,Ccdc86,Exosc10,Heatr3,Zfp622,Rpl24,Utp15,Wdr37,Mdn1,Eri3,Exosc1,Pdcd11,Mtg1,Pop4,Rpf1,Utp20,Ddx21,Rps27l,Dimt1,C1d,Chd7,Nob1,Srfbp1,Gnl2,Exosc8,Lsm6,Eri1,Frg1,Rpf2,Tsr2,Rrn3,Znhit6,Exosc6,Rps7,Nol11,Dis3,Exosc4,Rnmtl1,Xpo1,Nsun4,Fdxacb1,Gnl3l,Gtpbp10,Heatr1,Rrs1,2410016O06Rik,Malsu1,Sirt1,Mrpl20,Npm1,Nvl,Nat10,Utp23,Tfb1m,Mterf4,Gtpbp4,Exosc9,Nip7,Ddx27,Rps10,Wbp11,Abce…
GO:0045934	negative regulation of nucleobase-containing compound metabolic process	2.58534e-13	-28.9838	1263	501	0.0788108	6357	20933	69034,14245,18996,59057,17686,108655,21888,13132,53975,17295,245007,19650,17191,22061,69009,73086,268903,170826,67738,51869,12649,12053,99982,68190,102423,212276,77128,209361,18795,23967,68036,20230,13347,71169,15259,433693,15182,207667,15499,106931,353310,112405,13017,97165,19696,19826,28019,67772,19290,58230,53380,24015,12161,56805,14823,12389,103583,12234,72739,98496,243931,56195,17128,15258,3…	Nupr1l,Lpin1,Pou4f1,Zfp24,Msh3,Foxp1,Tle4,Dab2,Ddx20,Met,Zbtb38,Rbl1,Mbd2,Trp63,Thap7,Rps6ka5,Nrip1,Ppargc1b,Ppid,Rif1,Chek1,Bcl6,Kdm1a,Dubr,Hinfp,Zfp748,Crebrf,Taf3,Plcb1,Osr1,Zfp706,Satb1,Dffa,Nbas,Hipk3,Akirin2,Hdac2,Skor1,Hsf1,Kctd1,Zfp703,Egln1,Ctbp2,Hmgb2,Rel,Rnps1,Ing4,Chd8,Pura,Rnf8,Psmd10,Abce1,Bmp6,Zbtb33,Grm8,Cav1,Fbxw11,Btrc,Zkscan3,Pid1,Tshz3,Ptbp2,Smad4,Hipk2,Rsl1,Vprbp,Mef2c,Cbx7,E…
GO:0006402	mRNA catabolic process	2.89257e-13	-28.8715	109	70	0.0110115	6357	20933	100715,104625,103677,378430,66446,75901,233033,192160,67207,16341,387609,71723,233789,12457,103135,225929,17350,74133,230753,66094,208718,70640,68276,52830,72662,72068,14852,69125,67229,66373,109075,74108,72544,229512,19704,17149,234699,319618,69305,229663,381305,69639,78651,66362,18458,69902,214150,234594,16589,71701,232791,230738,24127,338359,75686,18983,27756,11992,66441,192170,353190,19826,50…	Papd4,Cnot6,Smg6,Nanos2,Exosc7,Dcp1a,Samd4b,Casc3,Lsm1,Eif3e,Zhx2,Dhx34,Smg1,Noct,Pan2,Patl1,Mlh1,Smg8,Thrap3,Lsm7,Dis3l2,Dcp2,Toe1,Pnrc2,Dis3,Cnot2,Gspt1,Cnot8,Prpf18,Lsm5,Exosc4,Parn,Exosc6,Smg5,Upf1,Magoh,Edc4,Dcp1b,Dcps,Csde1,Rc3h1,Exosc8,Lsm6,Exosc3,Pabpc1,Mrto4,Ago3,Cnot1,Uhmk1,Pnpt1,Cnot3,Zc3h12a,Xrn1,Supv3l1,Nudt16,Cnot7,Lsm2,Auh,Magohb,Eif4a3,Edc3,Rnps1,Exosc10,Polr2d,Smg9,Upf2,Nbas,Exos…
GO:0080135	regulation of cellular response to stress	3.18172e-13	-28.7762	543	244	0.0383829	6357	20933	16210,22160,236904,26409,117599,21853,16396,56458,18004,230738,15357,269473,77976,234736,209012,17246,14466,244694,14265,52521,12505,53618,99470,69260,142980,19090,320209,12490,12922,56428,18007,18779,56274,56085,68067,12778,18708,17210,14388,70238,17973,19255,15289,50754,12421,70681,20184,30957,20656,78688,73419,50755,107829,106052,50873,26407,18950,13197,18477,26406,101490,71701,57321,20655,143…	Impact,Twist1,Klhl15,Map3k7,Helb,Timeless,Itch,Foxo1,Nek1,Zc3h12a,Hmgcr,Lrig2,Nuak1,Rfwd3,Ulk4,Mdm2,Gba,Kdm4d,Fmr1,Zfp622,Cd44,Fut8,Magi3,Ing2,Tlr3,Prkdc,Ddx11,Cd34,Crhr2,Mtch2,Neo1,Pla2r1,Stk3,Ubqln1,Mrnip,Ackr3,Pik3r1,Mcl1,Gab1,Rnf168,Nck1,Ptpn2,Hmgb1,Fbxw7,Rb1cc1,Fam175a,Uimc1,Mapk8ip3,Sod2,Nol3,Armt1,Fbxo18,Thoc5,Fbxo4,Park2,Map3k4,Pnp,Gadd45a,Prdx1,Map3k3,Inpp5f,Pnpt1,Terf2ip,Sod1,Fzd8,Ccar2…
GO:0065003	macromolecular complex assembly	3.28138e-13	-28.7453	1155	463	0.0728331	6357	20933	544971,70356,15441,229317,66590,107435,66405,268566,12833,68184,66410,14151,114896,12042,67151,230649,56046,319185,107869,12972,13669,50708,72480,27364,69928,109900,24074,66482,15450,240614,66164,229211,22240,80913,67097,236511,20586,216001,66700,72475,227753,319179,71769,15368,27756,319158,77782,11764,66422,57837,66810,67733,19305,23874,13046,67804,66817,330189,110809,56298,246738,72149,26914,20…	Bdp1,St13,Hp1bp3,Eif2a,Farsa,Hat1,Mcts2,Gphn,Col6a1,Denr,Mterf3,Fech,Afg3l1,Bcl10,Psmd9,Atpaf1,Uqcc1,Hist1h2bl,Cth,Cryz,Eif3a,Hist1h1c,Tspyl4,Srr,Apitd1,Asl,Taf7,Exoc2,Lipc,Ranbp6,Nip7,Acad9,Dpysl3,Pum2,Rps10,Ago1,Smarca4,Micu1,Chmp3,Ssbp3,Gsn,Hist1h2be,Bbs10,Hmox1,Lsm2,Hist1h4i,Polq,Ap1b1,Dctpp1,Eral1,Rbm22,Itgb3bp,Pex5,Farsb,Celf1,Snx2,Tmem170,Tmem120b,Srsf1,Atl2,Dnajc28,Strada,H2afy,Stxbp3,Dnm…
GO:0006518	peptide metabolic process	4.11758e-13	-28.5183	435	203	0.0319333	6357	20933	14873,27103,11837,66541,16993,67994,67008,56422,231326,94063,170750,80898,237553,75398,27367,66242,76366,24015,211666,101592,27395,20102,26987,13684,100042807,109093,320806,14865,107045,27370,56347,27397,107869,14694,17380,229487,78523,107734,225215,230861,13669,68028,26905,69065,20085,66590,229317,19981,66405,56412,57808,66121,50492,78294,231279,68184,66410,70495,66258,224045,319195,66286,107732…	Gsto1,Eif2ak4,Rplp0,Immp1l,Lta4h,Mrps11,Yae1d1,Hbs1l,Aasdh,Mrpl16,Xpnpep1,Erap1,Trhde,Mrpl32,Rpl3,Mrps16,Mtif3,Abce1,Mgst2,Efl1,Mrpl15,Rps4x,Eif4e2,Eif4e,Eif3j2,Rars2,Gfm2,Gstm4,Lars,Rps26,Eif3c,Mrpl17,Cth,Rack1,Mme,Gatb,Mrpl9,Mrpl30,Rsl24d1,Eif4g3,Eif3a,Rpl22l1,Eif2s3x,Chac1,Rps19,Farsa,Eif2a,Rpl37a,Mcts2,Noa1,Rpl35a,Chchd1,Thop1,Rps27a,Guf1,Denr,Mterf3,Atp6ap2,Mrps17,Eif2b5,Rpl17,Sec11c,Mrpl10,…
GO:0007005	mitochondrion organization	5.20253e-13	-28.2845	394	187	0.0294164	6357	20933	26889,66075,15185,67472,22631,67105,67952,229487,56046,230649,27397,22428,14245,66410,114896,66121,56016,72026,30058,17527,72018,16882,56412,242557,18975,68197,103967,68185,226422,98496,94063,15525,52892,192287,67414,67994,67453,21854,338359,66541,73582,229211,109093,56384,320806,20520,75734,27395,52538,11977,76366,66242,327762,69487,66449,108853,11983,381760,21856,50776,74244,23830,19823,70120,1…	Cln8,Chchd3,Hdac6,Mtfr1,Ywhaz,Timm21,Tomm20,Gatb,Uqcc1,Atpaf1,Mrpl17,Dctn6,Lpin1,Mterf3,Afg3l1,Chchd1,Hebp2,Trmu,Timm8a1,Mpv17,Fundc1,Lig3,Noa1,Atg4c,Polg,Ndufc2,Dnm3,Coa4,Rab29,Pid1,Mrpl16,Hspa4,Sco1,Slc25a36,Mfn1,Mrps11,Slc25a46,Timm17a,Supv3l1,Immp1l,Camkmt,Acad9,Rars2,Letm1,Gfm2,Slc22a5,Mff,Mrpl15,Acaa2,Atp7a,Mtif3,Mrps16,Dna2,Ndufaf5,Pam16,Mtrf1l,Atpif1,Ssbp1,Timm44,Polg2,Atg7,Capn10,Rnf7,Ya…
GO:0051172	negative regulation of nitrogen compound metabolic process	5.83779e-13	-28.1693	1443	561	0.0882492	6357	20933	20922,68750,52463,23892,22630,27058,192285,236732,22788,219158,12566,81879,28036,17240,67154,22359,72567,234219,72416,71514,217827,13666,12013,225160,68877,233060,17258,20901,329679,229700,13380,19184,17692,330361,230908,243905,14629,66597,208146,17685,12848,236904,228536,73739,66148,14056,387244,68729,54713,13018,218914,53322,12014,18741,66118,30927,66266,12257,319594,66894,15213,19062,66310,136…	Supt4a,Rreb1,Tet1,Grem1,Ywhaq,Srp9,Phf21a,Rbm10,Zp3,Ccar2,Cdk2,Tfcp2l1,Larp7,Mdfi,Mtdh,Vldlr,Bclaf1,Helt,Lrpprc,Sfpq,Nrde2,Eif2ak3,Bach1,Thoc1,Maf1,Zfp382,Mef2a,Strap,Fnip2,Rbm15,Dkk1,Psmc5,Msl3,Gcfc2,Tardbp,Zfp568,Gclc,Trim13,Yeats2,Msh2,Cops2,Klhl15,Bahd1,Cby1,Dnajc15,Ezh2,Mirlet7a-1,Trim37,Fezf2,Ctcf,Wapl,Nucb2,Bach2,Pitx2,Sarnp,Snai3,Eapp,Tspo,Hif1an,Wwp2,Hey1,Inpp5k,Dpy30,Eif2b4,Srsf7,Cbx5,M…
GO:0000956	nuclear-transcribed mRNA catabolic process	6.08454e-13	-28.1279	89	60	0.00943841	6357	20933	18983,11992,72068,66441,14852,69125,109075,66373,67229,74108,192170,230753,232791,230738,70640,208718,24127,68276,52830,69305,71169,50911,433702,381305,229663,236511,72544,19826,229512,353190,17149,19704,234699,50912,319618,69241,71997,326622,66362,75901,66446,18458,100715,104625,103677,69639,233789,71723,12457,103135,17350,225929,74133,233033,192160,69902,67207,234594,16341,16589	Cnot7,Auh,Cnot2,Magohb,Gspt1,Cnot8,Exosc4,Lsm5,Prpf18,Parn,Eif4a3,Thrap3,Cnot3,Zc3h12a,Dcp2,Dis3l2,Xrn1,Toe1,Pnrc2,Dcps,Nbas,Exosc9,Ncbp1,Rc3h1,Csde1,Ago1,Exosc6,Rnps1,Smg5,Edc3,Magoh,Upf1,Edc4,Exosc10,Dcp1b,Polr2d,Smg9,Upf2,Exosc3,Dcp1a,Exosc7,Pabpc1,Papd4,Cnot6,Smg6,Exosc8,Smg1,Dhx34,Noct,Pan2,Mlh1,Patl1,Smg8,Samd4b,Casc3,Mrto4,Lsm1,Cnot1,Eif3e,Uhmk1
GO:0043604	amide biosynthetic process	9.24073e-13	-27.71	396	187	0.0294164	6357	20933	66448,66399,70223,68565,27053,107239,56284,68463,217869,353172,69821,272396,70560,107885,353242,16865,211006,66407,98221,69163,20115,13666,64658,13631,66845,94067,69606,110175,268656,382137,105148,66235,20918,66143,114641,212679,14852,211253,68916,13682,70791,19935,118451,20597,67941,20823,56040,19933,13405,20091,64656,104725,66475,19944,66416,59054,13690,14651,67204,71807,20090,18618,28030,69923…	Mrpl20,Tsfm,Nars,Mrps18a,Asns,Carns1,Mrpl19,Mrpl14,Eif5,Gars,Mterf4,Tarsl2,Wars2,Mthfs,Mrpl21,Eif2d,Sepsecs,Mrps15,Eif3m,Mrpl44,Rps7,Eif2ak3,Mrps25,Eef2k,Mrpl33,Mrpl43,Mtfmt,Ggct,Sptlc1,Fdxacb1,Iars,Eif1ax,Eif1,Eef1e1,Rpl31,Mars2,Gspt1,Mtrf1,Cdkal1,Eif4a2,Hars2,Mrpl23,Mrps2,Smpd1,Rps27l,Ssb,Rplp1,Rpl21,Dmd,Rps3a1,Mrps23,Sptssa,Rps23,Rpl29,Ndufa7,Mrps30,Eif4g2,Hagh,Eif2s2,Tars2,Rps29,Pemt,Gfm1,Agk…
GO:0007030	Golgi organization	2.27868e-12	-26.8074	95	62	0.00975303	6357	20933	59021,18760,67231,207352,75909,66890,70231,66725,16582,22367,67511,226422,66629,76499,53611,74498,338337,68053,69190,66352,73130,26395,20932,231580,71435,67669,53330,109168,17341,217379,84095,233824,67073,64009,231672,56041,27277,70297,56298,59041,246738,93687,104303,22631,58244,192197,68581,214895,56426,76332,68505,27374,211673,109181,228960,26951,70675,67727,386649,229593,209462,107338	Rab2a,Prkd1,Tbc1d20,Sec23ip,Vmp1,Lman2,Gorasp2,Lrrk2,Kifc3,Vrk1,Tmed9,Rab29,Golph3,Clasp2,Vti1a,Gorasp1,Cog3,Ubxn2b,Dym,Blzf1,Tmed5,Map2k1,Surf4,Gak,Arhgap21,Hikeshi,Vamp4,Atl3,Bhlha15,Ubxn2a,Pi4k2a,Cog7,Pi4k2b,Syne1,Fbxw8,Uso1,Golga5,Gcc2,Atl2,Stk25,Dnajc28,Csnk1a1,Arl1,Ywhaz,Stx6,Bcas3,Tmed10,Lman2l,Pdcd10,Cog2,Vps51,Prmt5,Arfgef1,Trip11,Stx16,Zw10,Vcpip1,Stx17,Nsfl1c,Golph3l,Hace1,Gbf1
GO:0043161	proteasome-mediated ubiquitin-dependent protein catabolic process	4.4018e-12	-26.149	233	121	0.0190341	6357	20933	70247,68053,18521,68867,103583,50762,66597,12234,448987,217194,72179,327799,223455,99011,236904,54644,73469,217379,81004,69259,20437,14084,19173,19053,74007,108159,67812,56812,23802,17463,12488,19359,50754,224826,66413,110616,208198,76302,321008,225743,22222,140499,56085,107995,27362,66799,93836,66435,83814,50873,76454,67338,242960,59003,244373,19358,105193,67819,106052,66894,26442,224170,192193,…	Psmd1,Ubxn2b,Pcbp2,Rnf122,Fbxw11,Fbxo6,Trim13,Btrc,Fbxl7,Klhl11,Fbxl2,Usp44,March6,Pomt1,Klhl15,Otud5,Rnf38,Ubxn2a,Tbl1xr1,Kctd5,Siah1a,Faf1,Psmb5,Ppp2cb,Btbd11,Ubxn8,Ubxn4,Dnajb2,Amfr,Psmd7,Cd2ap,Rad23b,Fbxw7,Ubr2,Psmd6,Atxn3,Btbd2,Pcnp,6330408A02Rik,Rnf165,Ubr1,Ube2j2,Ubqln1,Cdc20,Dnajb9,Ube2w,Rnf111,Uggt2,Nedd4l,Park2,Fbxo31,Rffl,Fbxl5,Maea,Erlin2,Rad23a,Nhlrc1,Derl1,Fbxo4,Wwp2,Psma5,Dzip3,Ede…
GO:0031328	positive regulation of cellular biosynthetic process	4.40744e-12	-26.1477	1694	641	0.100834	6357	20933	26416,74434,207785,15387,14281,21834,56706,241066,68010,23988,22278,56501,11303,66354,69219,75812,19042,56380,72135,15900,55994,232560,17355,12428,21951,75420,12554,13982,14573,12394,21417,381022,67040,22780,18028,56347,12162,72278,170930,22038,14236,24074,216825,104263,226641,21941,192170,24088,19055,19883,23938,71093,20586,231130,69585,69263,17425,69076,68142,72162,12464,74490,17878,16600,11911…	Mapk14,Sohlh2,Csrnp2,Hnrnpk,Fos,Thrb,Ccnl1,Carf,Bambi,Pin1,Usf1,Elf4,Abca1,Snw1,Ddah1,Tasp1,Ppm1a,Arid3b,Pygo1,Irf8,Smad9,Caprin2,Aff1,Ccna2,Tnks,Secisbp2,Cdh13,Esr1,Gdnf,Runx1,Zeb1,Kmt2d,Ddx17,Ikzf3,Nfib,Eif3c,Bmp7,Ccpg1,Sumo2,Plscr1,Foxn2,Taf7,Usp22,Kdm3a,Atf6,Tnfrsf8,Eif4a3,Tlr2,Ppp3ca,Rora,Map2k5,Atoh8,Smarca4,Tnip2,Hfe2,Rfc3,Foxk1,Triap1,Ino80,Dhx36,Cct4,Mamstr,Myf6,Klf4,Atf4,Pcna,Ikzf4,Sfrp…
GO:0000375	RNA splicing, via transesterification reactions	5.27006e-12	-25.969	159	90	0.0141576	6357	20933	66810,27374,330361,80744,53317,13046,110809,67242,22380,51796,15381,108121,20901,229700,67197,53890,67996,71713,68183,69192,217207,66645,192196,76522,70767,22185,27366,69305,71514,76938,68295,101214,66603,101437,20639,56194,54723,66978,76936,66877,66354,66373,72459,664883,67229,20630,20637,66492,66070,72193,231386,101739,68278,276919,12729,14105,53975,22184,75062,28000,56758,320632,78651,54633,11…	Rbm22,Prmt5,Gcfc2,Cwc22,Plrg1,Celf1,Srsf1,Gemin6,Wbp4,Srrm1,Hnrnpc,U2af1,Strap,Rbm15,Zcrb1,Sart3,Srsf6,Cdc40,Bcas2,Dhx16,Dhx8,Pspc1,Luc7l2,Lsm8,Prpf3,U2af2,Txnl4a,Dcps,Sfpq,Rbm17,Aar2,Tra2a,Gemin2,Dhx32,Snrpb2,Prpf40a,Tfip11,Luc7l,Hnrnpm,Crnkl1,Snw1,Lsm5,Htatsf1,Nova1,Prpf18,Snrpc,Snrnp70,Zmat2,Cwc15,Scaf11,Ythdc1,Psip1,Ddx39,Gemin4,Clns1a,Srsf10,Ddx20,Zrsr2,Sf3a3,Prpf19,Mbnl1,Snrnp200,Lsm6,Pqbp1…
GO:0016569	covalent chromatin modification	6.70211e-12	-25.7286	419	193	0.0303602	6357	20933	15185,217127,99982,50708,224826,244059,214669,71330,109151,232232,67382,20230,208727,433759,170644,107986,19650,17191,73086,109263,107435,19821,103136,218214,77683,64050,78783,20586,22367,73674,321006,17257,225131,107823,214899,52690,81004,15182,18676,100683,76804,320713,213389,59026,11785,223775,67772,216825,58230,219249,28019,224836,100043497,102162,104263,269003,56353,93765,114642,66233,270627…	Hdac6,Kat7,Kdm1a,Hist1h1c,Ubr2,Chd2,L3mbtl2,Rcbtb1,Chd9,Hdac11,Brd3,Satb1,Hdac4,Hdac1,Ubn1,Ddb2,Rbl1,Mbd2,Rps6ka5,Rlf,Hat1,Rnf2,Pwp1,Kdm1b,Ehmt1,Yeats4,Brpf1,Smarca4,Vrk1,Wdr75,Vprbp,Mecp2,Wac,Whsc1,Kdm5a,Setd3,Tbl1xr1,Hdac2,Phf2,Trrap,Kdm4c,Mysm1,Prdm9,Huwe1,Apbb1,Pim3,Chd8,Usp22,Rnf8,Tdrd3,Ing4,Usp49,Nat8f7,Taf5l,Kdm3a,Sap130,Rybp,Ube2n,Brdt,Dmap1,Taf1,H2afy,Kmt2d,Dnajc2,Mettl8,Ppp5c,Rcor1,Leo1…
GO:0043603	cellular amide metabolic process	6.77227e-12	-25.7182	567	248	0.0390121	6357	20933	22384,14450,70354,110960,68044,70478,68193,14466,18521,238505,14629,19941,14854,26451,217715,69923,75805,67891,214580,27393,244141,108156,64657,208449,67115,67427,69956,20103,59287,59054,19164,13690,66416,66475,19944,104725,56529,20091,13405,64656,28030,20090,18618,58994,20656,71807,67204,14651,56040,66190,20823,67941,20597,103140,56208,19935,118451,66552,19933,14782,192166,66235,15212,223753,105…	Eif4h,Gart,Secisbp2l,Tars,Chac2,Mipep,Rpl24,Gba,Pcbp2,Mtr,Gclc,Rpl26,Gss,Rpl27a,Eif2b2,Agk,Nln,Rpl4,Pstk,Mrpl39,Nars2,Mthfd1,Mrps10,Sgms1,Rpl14,Rps20,Ptcd3,Rps5,Ncstn,Mrps30,Psen1,Eif4g2,Ndufa7,Rps23,Rpl29,Sptssa,Sec11a,Rps3a1,Dmd,Mrps23,Gfm1,Rps29,Pemt,Smpd3,Sod2,Tars2,Eif2s2,Hagh,Rplp1,Acer3,Ssb,Rps27l,Smpd1,Gstt3,Becn1,Mrpl23,Mrps2,Sppl2a,Rpl21,Gsr,Sardh,Eif1ax,Hexb,Cerk,Iars,Sod1,Fdxacb1,Hars…
GO:0009891	positive regulation of biosynthetic process	8.44934e-12	-25.4969	1729	651	0.102407	6357	20933	208727,22642,14362,21415,20788,12042,433759,80707,228980,320267,229317,98415,66970,80292,12168,18763,22632,16392,18933,230861,235623,13614,353187,54343,18676,13872,81004,236511,11554,225872,20851,15437,68734,22339,70470,26896,12912,17933,21685,214899,11991,72475,17257,16650,19726,11865,73689,223527,19016,54422,13010,17126,218772,75273,21676,22337,20846,30877,13649,12753,67778,12023,98053,69228,17…	Hdac4,Zbtb17,Fzd1,Tcf7l1,Srebf2,Bcl10,Hdac1,Wwox,Taf4,Fubp3,Eif2a,Nucks1,Ssbp2,Zxdc,Bmpr2,Pkd1,Yy1,Isl1,Prrx1,Eif4g3,Scap,Edn1,Nr1d2,Atf7ip,Phf2,Ercc3,Tbl1xr1,Ago1,Adrb1,Npas4,Stat5b,Hoxd8,Smek1,Vegfa,Rprd1b,Med14,Creb1,Myt1l,Tef,Kdm5a,Hnrnpd,Ssbp3,Mecp2,Kpna6,Rfx3,Arntl,Bloc1s2,Eny2,Pparg,Barhl1,Cst3,Smad2,Rarb,Pelp1,Tead1,Vdr,Stat1,Gnl3,Egfr,Clock,Zfp639,Barx2,Gtf2f1,Zfp746,Myo6,Crem,Nobox,Zfp1…
GO:0016570	histone modification	9.41055e-12	-25.3892	303	148	0.0232814	6357	20933	208146,230674,20375,239122,68729,244694,13619,74195,14056,69726,24075,70238,108829,66979,56456,20184,246103,12914,226976,328572,228714,71777,214133,52615,110948,22385,18193,217031,66317,15468,74112,14841,17847,13486,22194,140858,70088,14051,228790,50709,22289,77305,217588,99890,52592,27878,73247,71514,214498,74322,73390,13990,213464,14050,23808,76246,233904,17692,12190,66083,77035,27374,93759,217…	Yeats2,Kdm4a,Spi1,Setdb2,Trim37,Kdm4d,Phc1,Elp3,Ezh2,Smyd3,Taf10,Rnf168,Jmjd1c,Pole4,Actl6a,Uimc1,Atxn7,Crebbp,Kansl3,Ep300,Csrp2bp,Ing3,Tet2,Suz12,Hlcs,Baz1b,Nsd1,Tada2a,Wdr61,Prmt2,Usp16,Gsg2,Usp34,Dr1,Ube2e1,Wdr5,Meaf6,Eya4,Asxl1,Hist1h1e,Kdm6a,Wdr82,Mbip,Prmt6,Brms1l,Tada1,Mrgbp,Sfpq,Cdc73,Cxxc1,Msl3l2,Smarcad1,Rbbp5,Eya3,Ash2l,Rtf1,Setd1a,Msl3,Brca2,Setd6,Kdm8,Prmt5,Sirt1,Morf4l1,Ctr9,Kat2b,…
GO:0000398	mRNA splicing, via spliceosome	9.93962e-12	-25.3345	158	89	0.0140003	6357	20933	78688,76167,20643,54633,11834,66381,210529,78651,28000,56758,320632,14105,75062,53975,22184,276919,12729,231386,72193,66070,68278,101739,66492,20630,20637,66055,83703,56195,212880,108013,328110,66125,27756,68981,117599,193116,67225,433702,57905,68011,81898,224836,60321,14007,217207,69192,66645,192196,68183,53890,67996,67197,229700,71713,20901,22380,51796,67242,110809,108121,15381,80744,53317,1304…	Nol3,Snrnp35,Snrpe,Pqbp1,Aqr,Rnf113a2,Mettl14,Lsm6,Prpf19,Mbnl1,Snrnp200,Srsf10,Sf3a3,Ddx20,Zrsr2,Gemin4,Clns1a,Ythdc1,Scaf11,Cwc15,Ddx39,Psip1,Zmat2,Snrpc,Snrnp70,Sf3b6,Dbr1,Ptbp2,Ddx46,Celf4,Prpf39,Sf3b5,Lsm2,Snrpa1,Helb,Slu7,Rnpc3,Ncbp1,Isy1,Snrpg,Sf3b1,Usp49,Wbp11,Celf2,Dhx8,Dhx16,Pspc1,Luc7l2,Bcas2,Sart3,Srsf6,Zcrb1,Rbm15,Cdc40,Strap,Wbp4,Srrm1,Gemin6,Srsf1,U2af1,Hnrnpc,Cwc22,Plrg1,Celf1,Prm…
GO:0000377	RNA splicing, via transesterification reactions with bulged adenosine as nucleophile	9.93962e-12	-25.3345	158	89	0.0140003	6357	20933	68011,81898,224836,60321,14007,433702,57905,68981,117599,67225,193116,66055,83703,56195,212880,108013,328110,66125,27756,231386,72193,66070,68278,101739,66492,20637,20630,14105,75062,22184,53975,276919,12729,78651,28000,56758,320632,76167,78688,20643,11834,54633,210529,66381,22185,76522,70767,66603,101214,68295,71514,76938,27366,69305,56194,20639,101437,54723,76936,66978,72459,66373,664883,67229,…	Snrpg,Sf3b1,Usp49,Wbp11,Celf2,Ncbp1,Isy1,Snrpa1,Helb,Rnpc3,Slu7,Sf3b6,Dbr1,Ptbp2,Ddx46,Celf4,Prpf39,Sf3b5,Lsm2,Ythdc1,Scaf11,Cwc15,Ddx39,Psip1,Zmat2,Snrnp70,Snrpc,Srsf10,Sf3a3,Zrsr2,Ddx20,Gemin4,Clns1a,Lsm6,Prpf19,Mbnl1,Snrnp200,Snrnp35,Nol3,Snrpe,Aqr,Pqbp1,Mettl14,Rnf113a2,U2af2,Lsm8,Prpf3,Gemin2,Tra2a,Aar2,Sfpq,Rbm17,Txnl4a,Dcps,Prpf40a,Snrpb2,Dhx32,Tfip11,Hnrnpm,Luc7l,Htatsf1,Lsm5,Nova1,Prpf18…
GO:0016310	phosphorylation	1.27608e-11	-25.0846	954	385	0.0605632	6357	20933	67121,77976,231876,209012,22137,109333,13400,211323,57874,26409,20868,17691,105278,107197,211770,213452,50798,14083,242291,214580,75578,102448,56428,58988,14626,69923,23827,69635,12675,22390,68870,12531,20111,12167,19885,110157,18708,75320,68646,14388,66416,108737,67003,75483,18759,12750,56012,71481,26405,22169,84094,244631,11637,20768,12455,13636,14841,19262,18760,13549,234854,319955,330721,1557…	Mastl,Nuak1,Lmtk2,Ulk4,Ttk,Pkn2,Dmpk,Nrg1,Hacd3,Map3k7,Stk10,Sik1,Cdk20,Uqcc3,Trib1,Dstyk,Gne,Ptk2,Impad1,Pstk,Fggy,Xylb,Mtch2,Rps6kb2,Gk2,Agk,Bpnt1,Dapk1,Chuk,Wee1,Ak8,Cdc25b,Rps6ka1,Bmpr1b,Rorc,Raf1,Pik3r1,Etnk1,Nadk2,Gab1,Ndufa7,Oxsr1,Uqcrc2,Cox8c,Prkci,Clk4,Pgam2,Alpk1,Map3k2,Cmpk2,Plvap,Pskh1,Ak2,Sephs2,Ccnt1,Efna1,Gsg2,Ptpra,Prkd1,Dyrk1b,Cdk10,Ercc6,Nek5,Hus1,Map2k6,Map3k8,Idnk,Tpk1,Ttc7b,F…
GO:0010498	proteasomal protein catabolic process	1.35346e-11	-25.0258	241	123	0.0193487	6357	20933	27362,107995,66799,140499,56085,225743,22222,28000,321008,224826,110616,208198,76302,66413,19359,12488,50754,23802,56812,17463,26442,192193,224170,67819,106052,66894,105193,19358,59003,244373,242960,76454,67338,50873,93836,66435,83814,236904,54644,223455,327799,72179,99011,217194,448987,12234,68867,103583,66597,50762,18521,70247,68053,67812,108159,74007,19053,19173,14084,217379,81004,69259,20437,…	Dnajb9,Cdc20,Ube2w,Ube2j2,Ubqln1,Rnf165,Ubr1,Prpf19,6330408A02Rik,Ubr2,Atxn3,Btbd2,Pcnp,Psmd6,Rad23b,Cd2ap,Fbxw7,Amfr,Dnajb2,Psmd7,Psma5,Edem1,Dzip3,Derl1,Fbxo4,Wwp2,Nhlrc1,Rad23a,Maea,Erlin2,Fbxl5,Fbxo31,Rffl,Park2,Rnf111,Uggt2,Nedd4l,Klhl15,Otud5,March6,Usp44,Fbxl2,Pomt1,Klhl11,Fbxl7,Btrc,Rnf122,Fbxw11,Trim13,Fbxo6,Pcbp2,Psmd1,Ubxn2b,Ubxn4,Ubxn8,Btbd11,Ppp2cb,Psmb5,Faf1,Ubxn2a,Tbl1xr1,Kctd5,Sia…
GO:2000113	negative regulation of cellular macromolecule biosynthetic process	1.99127e-11	-24.6397	1281	497	0.0781815	6357	20933	14359,239099,72322,22715,16882,234594,16600,17878,107435,208727,20583,319965,22218,66410,17425,13560,66869,18767,433759,20788,21415,14362,170765,72400,22350,207165,59036,54343,353187,14694,13614,16392,22130,18933,20319,22781,75339,210529,22632,18538,12168,66075,224826,50708,24074,15257,217351,15437,12162,81004,385674,230796,18628,13684,170930,236511,433702,71093,23938,20586,77683,231798,12952,129…	Fxr1,Homez,Xpo5,Zfp57,Lig3,Cnot1,Klf4,Myf6,Hat1,Hdac4,Snai2,Cc2d1b,Sumo1,Mterf3,Foxk1,E4f1,Zfp869,Pkia,Hdac1,Srebf2,Tcf7l1,Fzd1,Ripply3,Pinx1,Ezr,Bptf,Dact1,Atf7ip,Nr1d2,Rack1,Edn1,Isl1,Ttf1,Prrx1,Sfrp2,Ikzf4,Mphosph8,Mettl14,Yy1,Pcna,Bmpr2,Chchd3,Ubr2,Hist1h1c,Taf7,Hipk1,Tnrc6c,Hoxd8,Bmp7,Tbl1xr1,Zfp174,Wdtc1,Per3,Eif4e,Sumo2,Ago1,Ncbp1,Atoh8,Map2k5,Smarca4,Ehmt1,Lrch4,Cry1,Creb1,Xrn1,Whsc1,Mecp…
GO:0055114	oxidation-reduction process	2.40201e-11	-24.4521	824	338	0.0531697	6357	20933	67472,18115,266690,99982,76467,77219,241113,110391,11671,67247,11677,54122,68428,233065,270076,13861,67667,93747,68197,18679,11992,15490,17161,70316,78920,14187,26462,56690,22178,19223,60527,13017,107029,112405,66108,14555,228608,11363,16832,27357,52538,108841,13382,69487,227095,14149,50776,433375,18021,12040,66218,110460,230075,109232,11429,18452,52535,17449,18194,15483,16948,12491,328232,66885,…	Mtfr1,Nnt,Cyb5r4,Kdm1a,Msrb2,Ptgr2,Prkag3,Qdpr,Aldh3a2,Marc2,Akr1b3,Uevld,Steap3,Alkbh6,Gcdh,Epx,Alkbh8,Echs1,Ndufc2,Phka1,Auh,Hsd17b7,Maoa,Ndufab1,Dlst,Akr1b8,Txnrd2,Mlycd,Tyrp1,Ptgis,Fads3,Ctbp2,Me2,Egln1,Ndufa9,Gpd1,Smox,Acadl,Ldhb,Gyg,Acaa2,Rdh13,Dld,Ndufaf5,Hibch,Fdxr,Polg2,Creg1,Nfatc3,Bckdhb,Ndufb9,Acat2,Ndufb6,Sccpdh,Aco2,P4ha2,Mettl17,Mdh1,Nsdhl,Hsd11b1,Lox,Cd36,Gfod1,Acadsb,Dhrs11,Far1,…
GO:0006325	chromatin organization	2.71393e-11	-24.33	623	266	0.0418436	6357	20933	224836,28019,93696,58230,223775,11785,67772,100043497,320713,15182,59026,213389,321006,73674,319188,78783,52690,225131,239985,17191,19650,17955,170644,107986,22061,73086,97122,225280,114741,67382,20230,319184,217127,66336,21969,12649,214669,244059,99982,22110,64707,14479,59001,67773,56505,319168,16468,74763,225895,94092,13435,17928,20926,13626,71954,14048,93684,13831,52609,66505,20587,15381,75560…	Usp49,Ing4,Chrac1,Rnf8,Pim3,Apbb1,Chd8,Nat8f7,Mysm1,Hdac2,Huwe1,Prdm9,Vprbp,Wdr75,Hist1h2bp,Brpf1,Setd3,Wac,Arid1b,Mbd2,Rbl1,Nap1l4,Ubn1,Ddb2,Trp63,Rps6ka5,Hist2h4,Ino80c,Supt16,Brd3,Satb1,Hist1h2bk,Kat7,Cenpp,Top1,Chek1,L3mbtl2,Chd2,Kdm1a,Tspyl1,Suv39h2,Usp15,Pole3,Kat8,Ruvbl1,Hist1h2ah,Jarid2,Naa60,Taf6l,Trim16,Dnmt3a,Myog,Supt6,Eed,Suds3,Eya1,Selenof,Epc1,Cbx7,Zmynd11,Smarcb1,Hnrnpc,Ep400,Rnf2…
GO:1901566	organonitrogen compound biosynthetic process	2.88575e-11	-24.2687	777	321	0.0504955	6357	20933	11674,26451,217715,19941,12922,244141,27393,54391,66154,67891,75894,12660,11566,67427,67115,64657,208449,170442,14450,68055,70354,110960,14916,238505,68193,66454,14629,14661,67941,56040,19935,192185,66475,19944,59054,13690,22247,13405,51797,20090,18618,14718,28030,20512,14651,67204,71807,64658,218865,13631,70750,23971,13666,94067,11564,68833,210044,16591,382137,70791,64602,20918,212679,114641,149…	Aldoa,Rpl27a,Eif2b2,Rpl26,Crhr2,Nars2,Mrpl39,Rfk,Tmem14c,Rpl4,Adal,Chka,Adss,Rps20,Rpl14,Mrps10,Sgms1,Bbox1,Gart,Atp5s,Secisbp2l,Tars,Guca2b,Mtr,Rpl24,Nmnat1,Gclc,Glud1,Rps27l,Rplp1,Mrpl23,Nadk,Rps23,Rpl29,Mrps30,Eif4g2,Umps,Dmd,Ctps,Rps29,Pemt,Got1,Gfm1,Slc1a3,Hagh,Eif2s2,Tars2,Mrps25,Chdh,Eef2k,Kdsr,Papss1,Eif2ak3,Mrpl43,Adsl,Pdcl3,Adcy2,Kl,Fdxacb1,Hars2,Ireb2,Eif1,Mars2,Rpl31,Guk1,Aldh4a1,Haao…
GO:0006403	RNA localization	3.00934e-11	-24.2267	144	82	0.0128992	6357	20933	72322,21454,223642,12464,107829,72787,68278,54196,66874,66118,445007,71701,269113,14105,66231,55989,20853,69823,65246,227720,66069,67952,74412,268420,20492,66362,22632,170762,76438,319765,14265,50912,103468,69241,433702,54387,66441,72124,192160,218210,223527,21951,226747,20926,30959,101187,73192,110809,69736,73666,103677,56009,100042165,234814,18148,225160,229512,13680,195236,229937,19386,71844,5…	Xpo5,Tcp1,Zc3h3,Cct4,Thoc5,Ndc1,Ddx39,Pabpn1,Ncbp3,Sarnp,Nup85,Pnpt1,Nup54,Srsf10,Thoc7,Nop58,Stau1,Fyttd1,Xpo7,Nup214,Snupn,Tomm20,Gle1,Alkbh5,Slbp,Exosc3,Yy1,Nup155,Rftn1,Igf2bp2,Fmr1,Exosc10,Nup107,Polr2d,Ncbp1,Mcm3ap,Magohb,Seh1l,Casc3,Nup153,Eny2,Tnks,Ahctf1,Supt6,Ddx25,Parp11,Xpot,Srsf1,Nup37,Thoc3,Smg6,Alyref2,BC005561,Mthfsd,Npm1,Thoc1,Smg5,Ddx19a,Pom121l2,Znhit6,Ranbp2,Nupl1,Nup160,Magoh…
GO:0045333	cellular respiration	3.28535e-11	-24.139	119	71	0.0111688	6357	20933	17449,12862,20917,66052,67264,68263,15926,52535,11429,14297,12861,18597,12868,17993,66170,66218,18021,20916,50776,69577,98314,12064,15929,67273,13382,21379,12850,93757,407785,19017,17448,12858,320720,74450,68202,11564,12869,50799,11428,66152,20617,22273,12359,68943,66359,170718,67834,67003,235339,75483,66416,69089,20512,20656,67472,22272,72900,14555,66841,66945,56428,18293,12867,17257,78830,78920…	Mdh1,Cox6a2,Suclg2,Sdhc,Ndufb8,Pdhb,Idh1,Mettl17,Aco2,Fxn,Cox6a1,Pdha1,Cox8a,Ndufs4,Chchd5,Ndufb9,Nfatc3,Sucla2,Polg2,Fastkd3,D2hgdh,Bdnf,Idh3g,Ndufa10,Dld,Tbrg4,Coq7,Immp2l,Ndufs6,Ppargc1a,Mdh2,Cox5a,Fastkd1,Pank2,Ndufa5,Adsl,Cox8b,Slc25a13,Aco1,Uqcr10,Snca,Uqcrc1,Cat,Pink1,Cox20,Idh3b,Idh3a,Uqcrc2,Dlat,Cox8c,Ndufa7,Oxa1l,Slc1a3,Sod2,Mtfr1,Uqcrq,Ndufv2,Gpd1,Etfdh,Sdha,Mtch2,Ogdh,Cox7c,Mecp2,Slc2…
GO:0051253	negative regulation of RNA metabolic process	7.35722e-11	-23.3328	1124	440	0.069215	6357	20933	19016,11865,57317,17876,17131,71723,319172,226830,15900,19726,71458,22337,21417,381022,26914,235041,18028,67778,67996,217864,12753,75420,17126,269003,56353,13982,12394,217732,54401,218772,21834,56070,22661,69228,18569,12023,15387,12916,207728,29871,17190,12419,225027,331623,27049,19062,240186,15213,74016,15270,66310,66354,239099,16600,234594,22715,107435,17878,208727,13560,66869,17425,22218,20583…	Pparg,Arntl,Srsf4,Myef2,Smad7,Dhx34,Hist1h2ab,Smyd2,Irf8,Rfx3,Bcor,Vdr,Zeb1,Kmt2d,H2afy,Kank2,Nfib,Zfp639,Srsf6,Rcor1,Clock,Secisbp2,Smad2,Sap130,Rybp,Esr1,Runx1,Cipc,Ywhab,Rarb,Thrb,Tcerg1,Zfp148,Zfp746,Pdcd4,Barx2,Hnrnpk,Crem,Pde2a,Scmh1,Mbd1,Cbx5,Srsf7,Bend3,Etv3,Inpp5k,Zfp438,Hey1,Phf19,H2afx,Dpy30,Snw1,Homez,Klf4,Cnot1,Zfp57,Hat1,Myf6,Hdac4,E4f1,Zfp869,Foxk1,Sumo1,Snai2,Cc2d1b,Mterf3,Hdac1,P…
GO:0070925	organelle assembly	7.87266e-11	-23.265	529	230	0.0361806	6357	20933	16563,236266,73916,16328,67070,12316,83922,66448,217335,16412,54636,67443,12457,212514,17350,67727,74362,116733,71909,69821,21821,17258,66734,229722,68016,235040,54138,53869,73873,228003,17996,15223,18011,239273,57342,19329,12121,66311,245866,67239,53331,68365,214444,72181,72982,12566,100226,69376,16691,66048,67941,72938,19335,225326,12617,98376,67590,56208,76260,380614,76779,20460,103765,70285,5…	Kif2a,Alms1,Ift57,Cep250,Lsm14a,Aspm,Cep41,Mrpl20,Fbf1,Itgb1,Wdr45,Map1lc3b,Noct,Spice1,Mlh1,Stx17,Spag17,Vps4a,Haus5,Mterf4,Ift88,Mef2a,Map1lc3a,5330417C22Rik,Murc,Atg4d,Atxn10,Rab11a,Fam161a,Klhl41,Neb,Foxj1,Neurl1a,Abcc4,Parva,Rab17,Bicd1,Cenpw,Ift52,Rpf2,Stx7,Rab14,Cdk5rap2,Nsun4,Tmem138,Cdk2,Stx12,Zpbp2,Krt8,Emc6,Rps27l,Hspb11,Rab23,Pik3c3,Cenpc1,Gorab,Tctn3,Becn1,Ttc8,Intu,Cluap1,Stil,Tmem1…
GO:0019637	organophosphate metabolic process	8.00238e-11	-23.2487	687	287	0.0451471	6357	20933	52123,27369,212862,16832,11977,14555,102247,321007,55951,75686,433931,66812,78920,70316,68197,668212,18704,107569,14178,80914,68971,12651,103199,235044,18795,18641,21871,27402,266690,18115,74182,231510,12850,15277,13807,407785,84652,50799,12869,20133,103850,22273,20617,227399,53332,26430,14137,67420,17449,59027,56409,18578,18655,74451,66218,18746,216739,14149,231327,224020,13382,53893,14626,23827…	Agpat5,Dguok,Chpt1,Ldhb,Atp7a,Gpd1,Gpat4,Serac1,Mpc1,Nudt16,Pigg,Ppcdc,Dlst,Ndufab1,Ndufc2,Efr3b,Pik3c2a,Nt5c3,Fgf7,Uck2,Tamm41,Chkb,Fig4,Plppr2,Plcb1,Pfkl,Atp6v0a2,Pdhx,Cyb5r4,Nnt,Gpcpd1,Agpat9,Coq7,Hk2,Eno2,Ndufs6,Fam126a,Slc25a13,Cox8b,Rrm1,Nt5m,Uqcrc1,Snca,Ppip5k2,Mtmr1,Parg,Fdft1,Far1,Mdh1,Nampt,Nudt3,Pde4b,Pgk1,Pgs1,Ndufb9,Pkm,Acsl6,Fdxr,Ppat,Pi4ka,Dld,Nudt5,Gk2,Bpnt1,Impad1,Mthfd1,Calcrl,M…
GO:0010558	negative regulation of macromolecule biosynthetic process	1.69141e-10	-22.5003	1341	512	0.0805411	6357	20933	17936,30928,21408,20924,106042,328572,56642,50755,210719,219150,19164,22654,24116,70238,18019,21885,74019,20602,26992,69635,21380,16476,17122,64453,51810,21847,19252,232791,230674,21853,16597,13813,16210,22160,56531,19687,75593,233833,243833,52679,69163,98403,98956,723883,20821,76246,22034,69237,56417,235320,50709,73390,18740,15223,13433,14461,17938,228790,13682,20679,382639,102466836,56449,19720…	Nab1,Zbtb18,Zfp354a,Supt5,Prickle1,Ep300,Ankrd2,Fbxo18,Mkx,Hmbox1,Psen1,Zfp13,Nelfa,Rnf168,Nfatc2,Tle1,Traf3ip1,Ncor2,Brd7,Dapk1,Tbx1,Jun,Mxd4,Zfp280b,Hnrnpu,Klf10,Dusp1,Cnot3,Kdm4a,Timeless,Klf12,Eomes,Impact,Twist1,Ylpm1,Rfc1,Malsu1,Tnrc6a,Zfp128,E2f7,Mrpl44,Zfp451,Nat10,Mir7b,Trim21,Rtf1,Traf6,Gtpbp4,Adar,Zbtb16,Hist1h1e,Msl3l2,Pitx1,Foxj1,Dnmt1,Gata2,Naca,Asxl1,Eif4a2,Sox6,Zbtb42,Mir7578,Ybx3…
GO:0006401	RNA catabolic process	1.70648e-10	-22.4914	129	74	0.0116407	6357	20933	70640,208718,19819,230753,66094,68276,52830,72068,69125,14852,72662,67229,66373,109075,74108,229512,72544,319618,68209,19704,17149,234699,69305,381305,229663,103677,104625,100715,378430,75901,66446,192160,233033,16341,387609,67207,71723,233789,103135,12457,74133,225929,17350,232791,230738,75686,338359,24127,66441,18983,11992,27756,192170,353190,19826,50912,71997,326622,69241,327762,71169,50911,43…	Dcp2,Dis3l2,Rnaseh1,Thrap3,Lsm7,Toe1,Pnrc2,Cnot2,Cnot8,Gspt1,Dis3,Prpf18,Lsm5,Exosc4,Parn,Smg5,Exosc6,Dcp1b,Rnaseh2c,Upf1,Magoh,Edc4,Dcps,Rc3h1,Csde1,Smg6,Cnot6,Papd4,Nanos2,Dcp1a,Exosc7,Casc3,Samd4b,Eif3e,Zhx2,Lsm1,Dhx34,Smg1,Pan2,Noct,Smg8,Patl1,Mlh1,Cnot3,Zc3h12a,Nudt16,Supv3l1,Xrn1,Magohb,Cnot7,Auh,Lsm2,Eif4a3,Edc3,Rnps1,Exosc10,Smg9,Upf2,Polr2d,Dna2,Nbas,Exosc9,Ncbp1,Ago1,Exosc8,Lsm6,Exosc3,…
GO:0016192	vesicle-mediated transport	2.36429e-10	-22.1654	912	364	0.0572597	6357	20933	50850,13649,22042,74006,20912,246738,74325,217030,53413,67158,98878,108012,94245,67378,72238,50797,76332,68505,73689,77579,14339,15900,68328,19325,67804,12068,12282,80718,66725,75909,11767,68943,11303,99696,12331,93835,19062,77432,11765,52906,98710,27008,12638,18711,11842,50907,11736,74051,17920,84095,16401,27681,52028,56044,74769,22350,270096,208647,320051,66691,22631,20615,269338,18571,14020,26…	Spast,Egfr,Tfrc,Dnm1l,Stxbp3,Dnajc28,Cltb,Synrg,Exoc7,Sft2d3,Ehd4,Ap1s2,Dtnbp1,Bbs2,Tbc1d5,Copb2,Cog2,Vps51,Bloc1s2,Myh10,Aktip,Irf8,Rab13,Rab10,Snx2,Bet1,Hyou1,Rab27b,Lrrk2,Vmp1,Ap1m1,Pink1,Abca1,Ankrd50,Cap1,Amn,Inpp5k,9530002B09Rik,Ap1g1,Ahi1,Rabif,Micall1,Cftr,Pikfyve,Arf3,Preb,Ankfy1,Steap2,Myo6,Pi4k2a,Itga4,Snf8,Bbs1,Rala,Pik3cb,Ezr,Mon1b,Creb3l2,Exph5,Gapvd1,Ywhaz,Snapin,Vps39,Pdcd6ip,Evi5…
GO:0010256	endomembrane system organization	2.5994e-10	-22.0706	431	192	0.0302029	6357	20933	235281,214895,53869,71446,104303,76757,17101,116733,74349,56041,68968,27277,231672,64009,73178,101187,71177,386649,67727,74018,27374,54198,230908,30931,105513,53611,22319,269116,319277,66890,12725,20655,69376,71116,18760,66460,53421,109168,17341,54214,53330,67669,76740,12558,231580,73130,104718,13666,26395,56491,13852,19878,235567,11735,269113,54208,54525,229593,99371,70675,11733,11938,109181,225…	Scn3b,Lman2l,Rab11a,Wrb,Arl1,Trdn,Lyst,Vps4a,Fam160a2,Uso1,Cdan1,Golga5,Fbxw8,Syne1,Wasl,Parp11,Asun,Nsfl1c,Stx17,Als2,Prmt5,Snx3,Tardbp,Tor1a,Chmp7,Vti1a,Vamp3,Nfasc,Washc4,Lman2,Clcn3,Sod1,Zpbp2,Stx18,Prkd1,Sys1,Sec61a1,Atl3,Bhlha15,Golga4,Vamp4,Hikeshi,Efr3a,Cdh2,Gak,Tmed5,Ttc7b,Eif2ak3,Map2k1,Vapb,Stx2,Rock2,Dnajc13,Ank3,Nup54,Arl6ip1,Syt7,Golph3l,Arfgef2,Vcpip1,Ank1,Atp2a2,Trip11,Pik3c3,Golg…
GO:0018193	peptidyl-amino acid modification	2.64696e-10	-22.0524	629	264	0.041529	6357	20933	18451,244631,69568,18760,14841,73390,18020,73247,99890,217588,77305,50709,19346,19386,233904,76246,23808,98403,18761,20620,18453,213464,16451,75565,71952,15161,223870,22083,112407,56228,66083,231876,67121,13400,109333,22137,17246,20375,14083,74195,53618,230789,22390,12675,19038,56456,68268,108737,18759,214133,71777,12750,57437,328572,226976,14158,74763,225895,94092,232533,56505,67773,80286,18125,…	P4ha1,Pskh1,Vkorc1l1,Prkd1,Gsg2,Msl3l2,Nfatc2ip,Mrgbp,Prmt6,Mbip,Wdr82,Hist1h1e,Rab6a,Ranbp2,Setd1a,Rtf1,Ash2l,Zfp451,Prkcq,Plk2,P4hb,Rbbp5,Jak1,Sgf29,2410016O06Rik,Hcfc1,Senp1,Ctr9,Egln3,Ube2j1,Setd6,Lmtk2,Mastl,Dmpk,Pkn2,Ttk,Mdm2,Spi1,Ptk2,Elp3,Fut8,Fam76a,Wee1,Chuk,Ppic,Actl6a,Zdhhc21,Oxsr1,Prkci,Tet2,Ing3,Clk4,Golga7,Ep300,Kansl3,Fer,Naa60,Taf6l,Trim16,Stk38l,Ruvbl1,Kat8,Tusc3,Nos1,Morc3,Agbl…
GO:0033044	regulation of chromosome organization	2.7236e-10	-22.0239	144	80	0.0125846	6357	20933	22596,72836,11789,59126,235661,320209,22137,51810,68549,12236,327799,11991,57321,26407,21454,12466,26951,107047,72162,15078,20460,17120,12464,56208,218914,13000,219150,217232,56150,50505,72400,12235,105988,67052,17535,59125,226026,15081,71514,269400,224023,26413,27354,229512,101685,268697,70799,319583,52206,21749,12461,244329,105837,17451,83560,215351,74493,20779,52563,19822,105377,237107,12465,2…	Xrcc5,Pot1b,Apc,Nek6,Dync1li1,Ddx11,Ttk,Hnrnpu,Sgol2a,Bub1b,Usp44,Hnrnpd,Terf2ip,Map3k4,Tcp1,Cct6a,Zw10,Psmg2,Dhx36,H3f3a,Stil,Mad1l1,Cct4,Becn1,Wapl,Csnk2a2,Hmbox1,Cdc27,Mad2l1,Ercc4,Pinx1,Bub1,Espl1,Ndc80,Mre11a,Nek7,Smc5,H3f3b,Sfpq,Rtel1,Klhl22,Mapk1,Nbn,Smg5,Spty2d1,Ccnb1,Cep192,Lig4,Anapc4,Terf1,Cct2,Mcph1,Mtbp,Mos,Tex14,Senp6,Tnks2,Src,Cdc23,Rnf4,Slf1,Gnl3l,Cct5,Fam178a,Hnrnpc,Ylpm1,Tnks,Wd…
GO:0006364	rRNA processing	3.64005e-10	-21.7339	171	91	0.0143149	6357	20933	64934,72614,52513,67222,216987,106338,67973,67276,14300,69639,78651,59028,12181,20085,66362,320790,67619,69902,67493,68533,70683,56200,67223,57316,66254,66161,276919,30946,18114,70285,55989,57808,67994,27993,100019,66583,18572,100609,140546,67134,105372,207615,74778,71151,60321,108673,19941,50912,50911,65961,67115,228889,224481,69821,76130,213895,69237,98956,18148,78581,100503670,66446,68966,9375…	Pes1,Pih1d2,Ddx56,Srfbp1,Utp6,Nsun3,Mphosph10,Eri1,Frg1,Exosc8,Lsm6,Rcl1,Bop1,Rps19,Exosc3,Chd7,Nob1,Mrto4,Mettl16,Mphosph6,Utp20,Ddx21,Rrp15,C1d,Dimt1,Pop4,Gemin4,Abt1,Rrp1,Rpf1,Nop58,Rpl35a,Mrps11,Imp4,Mdn1,Exosc1,Pdcd11,Nsun5,Eri3,Nop56,Utp15,Wdr37,Rrp7a,Eri2,Wbp11,Ccdc86,Rpl26,Exosc10,Exosc9,Utp3,Rpl14,Ddx27,Tfb1m,Mterf4,Las1l,Bms1,Gtpbp4,Nat10,Npm1,Utp23,Rpl5,Exosc7,Ngdn,Sirt1,Rps24,Rrs1,Hea…
GO:0072594	establishment of protein localization to organelle	3.7357e-10	-21.7079	279	134	0.0210791	6357	20933	56417,69821,66169,233726,110750,53869,20963,53612,70699,12190,70160,72930,66624,66384,69754,27057,27058,20813,66212,24067,271564,53611,69597,50771,19346,93757,71844,19386,231580,67437,15519,320938,195236,67669,54214,53421,66460,16646,29858,18708,56535,227720,66069,18634,19338,21809,230597,12257,56208,230895,16647,68653,106042,269113,76899,231430,445007,18386,103737,70478,238799,258153,103468,2345…	Adar,Mterf4,Tomm7,Ipo7,Cse1l,Rab11a,Syk,Vti1b,Nup205,Brca2,Vps36,Ppp2r2b,Spcs2,Srp19,Fbxo7,Ncoa4,Srp9,Srp14,Sec61b,Srp54a,Vps13a,Vti1a,Afg3l2,Atp9b,Rab6a,Immp2l,Nupl1,Ranbp2,Gak,Ssr3,Hsp90aa1,Tnpo3,Pom121l2,Hikeshi,Golga4,Sec61a1,Sys1,Kpna1,Pmm1,Pik3r1,Pex3,Nup214,Snupn,Pex7,Rab33b,Tgfb3,Zfyve9,Tspo,Becn1,Vps13d,Kpna2,Samm50,Prickle1,Nup54,Golga1,Cox18,Nup85,Oprd1,Pex12,Mipep,Tnpo1,Olfr412,Nup107…
GO:0048523	negative regulation of cellular process	4.08014e-10	-21.6197	4197	1440	0.226522	6357	20933	244694,20661,108961,19090,19053,59126,238803,319757,76983,15526,269473,23893,74498,14360,18984,57316,211673,19739,246103,18590,214150,12224,13197,244373,80750,20481,224860,12142,23897,17535,106389,19878,72611,17973,12235,12393,19338,58202,21809,18099,74164,22419,22185,225164,109552,15081,214498,59079,18230,214444,12121,223453,21812,14706,109700,66317,170823,68833,15468,319476,18218,22411,72068,10…	Kdm4d,Sort1,E2f8,Prkdc,Ppp2cb,Nek6,Zfp366,Smo,Scfd1,Hspa9,Lrig2,Grem2,Gorasp1,Fyn,Por,C1d,Arfgef1,Rgs9,Atxn7,Pdgfa,Ago3,Klf5,Gadd45a,Erlin2,N4bp1,Ski,Plcl2,Prdm1,Hax1,Mre11a,Eaf2,Rock2,Zfp655,Nck1,Bub1,Runx2,Rab33b,Nelfb,Tgfb3,Nlk,Nfx1,Wnt5b,U2af2,Mib1,Sri,H3f3b,Cdc73,Erbin,Nxn,Cdk5rap2,Bicd1,Dap,Tgfbr1,Gng4,Itga1,Wdr61,Glmn,Pdcl3,Prmt2,Lrtm1,Dusp8,Wnt11,Cnot2,Cenpf,Sec14l1,Xrcc2,Tnc,Morf4l1,Brca…
GO:0006605	protein targeting	4.142e-10	-21.6047	321	150	0.023596	6357	20933	20336,74718,19298,12492,17920,71146,67025,30056,75964,18141,27008,26413,69276,66661,76582,19062,68512,69482,13645,107939,227699,83946,21808,216440,16650,68080,19305,18969,70827,66810,11865,93742,218210,54401,21856,66449,171531,108705,15239,170829,320727,240614,74375,20742,74254,16211,140740,15525,242557,107513,66541,70572,26422,21854,19055,55989,114896,16649,218441,30058,170762,67105,66887,22631,…	Exoc4,Snx16,Pex19,Scarb2,Myo6,Golga7b,Rpl11,Timm9,Trappc8,Nup50,Micall1,Mapk1,Sec62,Srp72,Ipo11,Inpp5k,Tomm5,Nup35,Egf,Pom121,Nup188,Phip,Tgfb2,Os9,Kpna6,Gpn3,Pex5,Pola2,Trak2,Rbm22,Arntl,Pard3,Nup153,Ywhab,Timm44,Pam16,Mlph,Pttg1ip,Hgs,Tram2,Ipo8,Ranbp6,Gcc1,Sptbn1,Gpn1,Kpnb1,Sec63,Hspa4,Atg4c,Ssr1,Immp1l,Ipo5,Nbea,Timm17a,Ppp3ca,Nop58,Afg3l1,Kpna4,Zfyve16,Timm8a1,Nup155,Timm21,Lonp2,Ywhaz,Bcl6,…
GO:0042787	protein ubiquitination involved in ubiquitin-dependent protein catabolic process	4.50956e-10	-21.5197	131	74	0.0116407	6357	20933	20437,67345,59026,74007,226098,68497,231380,17246,70797,52323,68867,217194,94253,16396,236904,71745,83814,100763,93836,59003,69116,50873,67338,224170,66894,69807,23806,268291,23802,208198,68031,217069,225743,65256,321008,67138,209239,218203,56736,67923,26965,56438,207952,75841,207304,228662,107568,73998,29864,69754,76857,83962,12402,67118,226541,15204,209462,216440,80751,51902,78832,218215,99382,…	Siah1a,Herc4,Huwe1,Btbd11,Hectd2,Arel1,Uba6,Mdm2,Ankib1,Klhl7,Rnf122,Klhl11,Hecw1,Itch,Klhl15,Cul2,Nedd4l,Ube3c,Rnf111,Maea,Ubr4,Park2,Rffl,Dzip3,Wwp2,Trim32,Arih1,Rnf217,Amfr,Btbd2,Rnf146,Trim25,Rnf165,Asb2,6330408A02Rik,Herc6,Gan,Mylip,Rnf14,Eloc,Cul1,Rbx1,Klhl25,Rnf139,Hectd1,Btbd3,Wwp1,Herc3,Rnf11,Fbxo7,Spopl,Btbd1,Cbl,Bfar,Klhl20,Herc2,Hace1,Os9,Rnf34,Rnf24,Cacul1,Rnf144b,Abtb2,Ube3a,Rnf145,…
GO:0016197	endosomal transport	5.35956e-10	-21.347	199	102	0.0160453	6357	20933	28084,77573,100502841,271457,20661,56440,19344,211556,226422,231876,216131,66700,100855,30930,16558,13858,76959,231834,230514,218441,228960,225326,231855,19345,69150,74385,56208,227801,69178,20615,269338,14020,210148,17828,223593,27681,70297,270192,73288,11852,19329,69596,11736,66460,56418,329260,74718,12512,73122,68365,18711,76742,105835,105841,11765,27008,19346,22135,66310,67844,53611,11767,113…	Vps25,Vps33a,Epg5,Rab5a,Sort1,Snx1,Rab5b,Ap1ar,Rab29,Lmtk2,Trappc10,Chmp3,Tbc1d14,Vps26a,Kif16b,Eps15,Chmp5,Snx8,Leprot,Zfyve16,Stx16,Pik3c3,Ap5z1,Rab5c,Snx4,Ap5m1,Becn1,Dennd1a,Snx5,Snapin,Vps39,Evi5,Slc30a6,Bloc1s5,Washc5,Snf8,Gcc2,Rab6b,Vps50,Rhob,Rab17,Ap5s1,Ankfy1,Sys1,Ykt6,Dennd1b,Snx16,Cd63,Tgfbrap1,Rab14,Pikfyve,Snx27,Sgsm3,Dennd3,Ap1g1,Micall1,Rab6a,Tgoln2,Dpy30,Rab32,Vti1a,Ap1m1,Abca1,A…
GO:0010629	negative regulation of gene expression	7.83075e-10	-20.9678	1466	550	0.0865188	6357	20933	207165,14694,66075,22781,20319,69807,75339,18538,18458,69065,50708,72322,239099,17878,22715,234594,16600,17425,319965,66410,13560,66869,18767,19055,20586,23938,71093,231798,27274,74996,69585,107823,19821,192170,431706,52846,217351,24074,15257,385674,55988,12162,170930,381022,21417,217864,67996,18028,67378,269003,12955,54401,217732,232164,12394,13982,233033,17131,319172,15900,71458,226830,232560,2…	Bptf,Rack1,Chchd3,Ikzf4,Sfrp2,Trim32,Mphosph8,Pcna,Pabpc1,Chac1,Hist1h1c,Xpo5,Homez,Myf6,Zfp57,Cnot1,Klf4,Foxk1,Cc2d1b,Mterf3,E4f1,Zfp869,Pkia,Ppp3ca,Smarca4,Map2k5,Atoh8,Lrch4,Zfp354b,Usp47,Hfe2,Whsc1,Rnf2,Eif4a3,Zfp457,Cnot11,Tnrc6c,Taf7,Hipk1,Zfp174,Snx12,Bmp7,Sumo2,Kmt2d,Zeb1,Rcor1,Srsf6,Nfib,Bbs2,Sap130,Cryab,Ywhab,Cipc,Paip2b,Runx1,Esr1,Samd4b,Smad7,Hist1h2ab,Irf8,Bcor,Smyd2,Caprin2,Scmh1,B…
GO:0006091	generation of precursor metabolites and energy	8.75215e-10	-20.8566	228	113	0.0177757	6357	20933	64384,26384,18605,68197,72141,18679,78830,17257,12867,74114,107197,17685,67876,14194,78920,68961,77559,56428,18293,27357,66945,66841,72900,14555,11554,11674,20656,18976,20512,266690,22272,67472,216558,241113,18641,69089,66416,67003,235339,53412,75483,74185,19046,56012,14387,67834,170718,108099,68943,66359,110078,66152,12946,11428,16591,12359,22273,20617,11564,16195,74450,68202,320720,50799,12869,…	Sirt3,Gnpda1,Enpp1,Ndufc2,Adpgk,Phka1,Slc25a12,Mecp2,Cox7c,Crot,Uqcc3,Msh2,Coq10b,Fh1,Dlst,Phkg2,Agl,Mtch2,Ogdh,Gyg,Sdha,Etfdh,Ndufv2,Gpd1,Adrb1,Aldoa,Sod2,Pomc,Slc1a3,Cyb5r4,Uqcrq,Mtfr1,Ugp2,Prkag3,Pfkl,Oxa1l,Ndufa7,Uqcrc2,Dlat,Ppp1r3c,Cox8c,Gbe1,Ppp1cb,Pgam2,Gaa,Idh3a,Idh3b,Prkag2,Pink1,Cox20,Pygb,Uqcr10,Cr1l,Aco1,Kl,Cat,Uqcrc1,Snca,Adsl,Il6st,Pank2,Ndufa5,Fastkd1,Slc25a13,Cox8b,Epm2a,Immp2l,Hk…
GO:0034655	nucleobase-containing compound catabolic process	9.15617e-10	-20.8114	213	107	0.0168318	6357	20933	16589,234594,214150,22687,69902,18950,76654,71701,78651,69639,110074,18458,67464,50755,66362,71997,326622,69241,50912,327762,53893,19826,353190,236511,433702,13368,50911,71169,75894,75686,338359,24127,230738,17308,232791,192170,69694,18605,381101,66441,242202,11992,27756,18983,387609,56045,16341,56409,67207,15254,192160,66422,83965,233033,16434,74133,225929,17350,18578,229709,12457,103135,24128,2…	Uhmk1,Cnot1,Ago3,Zpr1,Mrto4,Pnp,Upp2,Pnpt1,Lsm6,Exosc8,Dut,Pabpc1,Entpd4,Fbxo18,Exosc3,Smg9,Upf2,Polr2d,Exosc10,Dna2,Nudt5,Rnps1,Edc3,Ago1,Ncbp1,Dffb,Exosc9,Nbas,Adal,Nudt16,Supv3l1,Xrn1,Zc3h12a,Mgat1,Cnot3,Eif4a3,Tatdn1,Enpp1,Dnph1,Magohb,Pde5a,Auh,Lsm2,Cnot7,Zhx2,Samhd1,Eif3e,Nudt3,Lsm1,Hint1,Casc3,Dctpp1,Enpp5,Samd4b,Itpa,Smg8,Patl1,Mlh1,Pde4b,Ahcyl1,Noct,Pan2,Xrn2,Smg1,Dhx34,Nanos2,Pde1a,Smg6…
GO:0006915	apoptotic process	9.4611e-10	-20.7787	786	317	0.0498663	6357	20933	52440,98267,17685,75778,14629,21813,230126,12236,142980,19090,52521,53323,20661,54391,24075,17346,19053,59126,208449,12235,56274,18567,19878,17210,106389,12177,19015,20656,60505,67941,18570,21843,56208,57316,13143,12366,50527,16973,68833,228026,21812,219158,67770,20874,11783,12175,70310,17311,13666,106869,72567,223453,94044,329679,17258,66660,170936,12211,11797,225160,16858,192656,70417,19291,152…	Tax1bp1,Stk17b,Msh2,Them4,Gclc,Tgfbr2,Shb,Bub1b,Tlr3,Prkdc,Zfp622,Ube2k,Sort1,Rfk,Taf10,Mknk1,Ppp2cb,Nek6,Sgms1,Bub1,Stk3,Pdcd2,Rock2,Mcl1,Eaf2,Bnip3l,Ppard,Sod2,Il21,Rps27l,Pdcd6,Tial1,Becn1,C1d,Dapk2,Casp2,Ero1l,Lrp5,Pdcl3,Pdk1,Tgfbr1,Ccar2,Caap1,Slk,Apaf1,Bnip2,Plscr3,Kitl,Eif2ak3,Tnfaip8,Bclaf1,Dap,Bcl2l13,Fnip2,Mef2a,Sltm,Zfp369,Birc6,Birc2,Thoc1,Lgals7,Ripk2,Megf10,Purb,Hint1,Brca2,Tardbp,R…
GO:0045892	negative regulation of transcription, DNA-templated	9.87264e-10	-20.7361	1052	409	0.0643385	6357	20933	17257,107823,74996,27274,69585,214899,23938,20586,71093,231798,77683,12952,12912,431706,22200,22339,19821,15437,15257,24074,230796,18628,170930,81004,12162,385674,59036,54343,353187,13614,170765,22350,207165,224826,50708,16392,20319,22781,18933,75339,22632,18538,66075,234594,22715,16600,17878,107435,239099,18767,433759,20788,21415,14362,208727,17425,22218,319965,20583,66410,66869,13560,12419,1719…	Mecp2,Whsc1,Usp47,Zfp354b,Hfe2,Kdm5a,Map2k5,Smarca4,Atoh8,Lrch4,Ehmt1,Cry1,Creb1,Zfp457,Uba3,Vegfa,Rnf2,Hoxd8,Hipk1,Taf7,Wdtc1,Per3,Sumo2,Tbl1xr1,Bmp7,Zfp174,Dact1,Atf7ip,Nr1d2,Edn1,Ripply3,Ezr,Bptf,Ubr2,Hist1h1c,Isl1,Sfrp2,Ikzf4,Prrx1,Mphosph8,Yy1,Pcna,Chchd3,Cnot1,Zfp57,Klf4,Myf6,Hat1,Homez,Pkia,Hdac1,Srebf2,Tcf7l1,Fzd1,Hdac4,Foxk1,Sumo1,Cc2d1b,Snai2,Mterf3,Zfp869,E4f1,Cbx5,Mbd1,Bend3,Scmh1,Snw…
GO:0045944	positive regulation of transcription from RNA polymerase II promoter	1.09621e-09	-20.6314	1044	406	0.0638666	6357	20933	16598,319944,228790,15904,15223,20024,17938,14461,19017,14013,18740,60411,18020,17341,51813,22697,18760,328365,14370,74112,14634,70380,14082,17075,67089,12455,17342,20679,77578,22083,17979,52679,69109,12785,15402,17354,18986,223870,16870,14536,15505,14531,22034,12572,71175,80280,23808,76246,320878,320817,68016,20683,21380,12675,16476,14428,14375,68705,223513,16597,13813,54394,211323,22160,56458,5…	Klf2,Taf2,Asxl1,Id4,Foxj1,Sub1,Naca,Gata2,Ppargc1a,Mecom,Pitx1,Cenpk,Nfatc2ip,Bhlha15,Ccnc,Zscan21,Prkd1,Zmiz1,Fzd8,Usp16,Gli3,Mospd1,Fadd,Epcam,Psmc6,Ccnt1,Mitf,Sox6,Bcl9,Ctr9,Ncoa3,E2f7,Fam58b,Cnbp,Hoxa5,Mllt10,Pou2f1,Senp1,Lhx2,Nr6a1,Hsph1,Gcm1,Traf6,Cdk7,Nipbl,Cdk5rap3,Ash2l,Rtf1,Mical2,Atad2b,Murc,Sp1,Tbx1,Chuk,Jun,Galr2,Xrcc6,Gtf2f2,Abra,Klf12,Eomes,Crlf3,Nrg1,Twist1,Foxo1,Akap8l,Zc3h12a,Me…
GO:0031327	negative regulation of cellular biosynthetic process	1.16924e-09	-20.5669	1395	525	0.0825861	6357	20933	209361,102423,20230,227331,56321,51869,67738,387225,68190,268903,14245,21888,13132,17295,59057,380855,27103,56805,14823,12234,72739,243931,15258,17128,103583,11363,67772,56403,19290,28019,12161,433693,13017,74244,17999,17127,18021,17132,243308,94275,17450,69642,12261,15228,270110,110213,58521,99311,20926,28113,381695,66505,71954,15381,67933,19317,16468,12491,19106,23872,72999,12850,15331,13665,11…	Taf3,Hinfp,Satb1,Gigyf2,Aatf,Rif1,Ppid,Mir30a,Dubr,Nrip1,Lpin1,Tle4,Dab2,Met,Zfp24,Rsl1,Eif2ak4,Zbtb33,Grm8,Btrc,Zkscan3,Tshz3,Hipk2,Smad4,Fbxw11,Acadl,Chd8,Syncrip,Pura,Ing4,Bmp6,Akirin2,Ctbp2,Atg7,Nedd4,Smad3,Nfatc3,Maf,A430033K04Rik,Maged1,Morc1,Mlip,C1qbp,Foxg1,Irf2bp2,Tmbim6,Eid1,Commd7,Supt6,Tinf2,N4bp2l2,Zmynd11,Suds3,Hnrnpc,Hcfc2,Qk,Jarid2,Cd36,Eif2ak2,Ets2,Insig2,Coq7,Hmgn2,Eif2s1,Ang,Fh…
GO:0051276	chromosome organization	1.21597e-09	-20.5277	416	184	0.0289445	6357	20933	15182,13872,11789,54141,74355,19290,16211,69928,229776,51792,327762,114714,67139,319158,83984,21974,101994,20586,319188,380664,319179,24127,338359,224640,75686,11991,104721,76959,17686,97122,170644,15441,68142,17955,11792,70385,109263,107435,21745,18538,22632,51869,66336,21969,319184,56150,50708,72480,170762,50505,72400,76044,14211,67052,319185,107995,226026,54380,224023,269400,77987,101685,22110…	Hdac2,Ercc3,Apc,Spag5,Smchd1,Pura,Kpnb1,Apitd1,Cdc14a,Ppp2r1a,Dna2,Rad51c,Mis12,Hist1h4i,Tssk6,Top2b,Champ1,Smarca4,Hist1h2bp,Lemd3,Hist1h2be,Xrn1,Supv3l1,Lemd2,Nudt16,Hnrnpd,Ddx1,Chmp5,Msh3,Hist2h4,Ubn1,Hp1bp3,Ino80,Nap1l4,Apex1,Spdl1,Rlf,Hat1,Tep1,Pcna,Yy1,Rif1,Cenpp,Top1,Hist1h2bk,Mad2l1,Hist1h1c,Tspyl4,Nup155,Ercc4,Pinx1,Ncapg2,Smc2,Ndc80,Hist1h2bl,Cdc20,Smc5,Smarcal1,Klhl22,Rtel1,Ascc3,Spty2…
GO:0050657	nucleic acid transport	1.37297e-09	-20.4063	124	70	0.0110115	6357	20933	101187,110809,73666,69736,73192,218210,223527,21951,192160,72124,30959,226747,20926,18148,225160,103677,56009,100042165,64930,229279,56488,214597,20422,72416,234733,19386,229512,195236,13680,17149,71844,59015,231042,103573,227699,107939,73473,19317,225027,140488,71701,54196,66874,66118,445007,69823,14105,269113,66231,223642,72322,68278,107829,72787,268420,20492,76438,319765,170762,67952,66069,227…	Parp11,Srsf1,Thoc3,Nup37,Xpot,Nup153,Eny2,Tnks,Casc3,Seh1l,Ddx25,Ahctf1,Supt6,Npm1,Thoc1,Smg6,Alyref2,BC005561,Tsc1,Hnrnpa3,Nxt1,Sidt2,Shfm1,Lrpprc,Ddx19b,Ranbp2,Smg5,Pom121l2,Ddx19a,Magoh,Nupl1,Nup160,Nupl2,Xpo1,Nup188,Pom121,Iws1,Qk,Srsf7,Igf2bp3,Pnpt1,Pabpn1,Ncbp3,Sarnp,Nup85,Fyttd1,Srsf10,Nup54,Thoc7,Zc3h3,Xpo5,Ddx39,Thoc5,Ndc1,Alkbh5,Slbp,Rftn1,Igf2bp2,Nup155,Tomm20,Snupn,Nup214,Xpo7,Gle1,Nc…
GO:0050658	RNA transport	1.37297e-09	-20.4063	124	70	0.0110115	6357	20933	74412,67952,227720,65246,66069,319765,76438,170762,268420,20492,68278,72787,107829,223642,72322,69823,66231,269113,14105,71701,66118,66874,445007,54196,54387,66441,103468,69241,14265,433702,100042165,56009,103677,225160,18148,30959,20926,226747,223527,21951,218210,192160,72124,73666,73192,110809,69736,101187,225027,140488,107939,227699,19317,73473,103573,231042,17149,59015,71844,19386,13680,19523…	Gle1,Tomm20,Nup214,Xpo7,Snupn,Igf2bp2,Rftn1,Nup155,Alkbh5,Slbp,Ddx39,Ndc1,Thoc5,Zc3h3,Xpo5,Fyttd1,Thoc7,Nup54,Srsf10,Pnpt1,Sarnp,Ncbp3,Nup85,Pabpn1,Mcm3ap,Magohb,Nup107,Polr2d,Fmr1,Ncbp1,BC005561,Alyref2,Smg6,Thoc1,Npm1,Ddx25,Supt6,Ahctf1,Eny2,Tnks,Nup153,Casc3,Seh1l,Thoc3,Xpot,Srsf1,Nup37,Parp11,Srsf7,Igf2bp3,Pom121,Nup188,Qk,Iws1,Xpo1,Nupl2,Magoh,Nup160,Nupl1,Ranbp2,Ddx19a,Pom121l2,Smg5,Shfm1,L…
GO:0007346	regulation of mitotic cell cycle	1.3876e-09	-20.3957	422	186	0.0292591	6357	20933	27214,12545,237877,17691,17685,230126,234736,12236,17246,68193,22137,109333,26992,19090,50875,59126,229543,14056,68067,74370,77744,17535,103733,72611,105988,12235,15289,12531,73754,56208,17120,20460,67941,12537,12914,66197,19363,26951,12366,67064,13197,77011,71701,14841,12566,70012,52696,16973,15468,69754,14365,234854,11491,105837,244329,57028,18712,108000,21749,27354,234664,214498,15574,264064,2…	Dbf4,Cdc7,Atad5,Sik1,Msh2,Shb,Rfwd3,Bub1b,Mdm2,Rpl24,Ttk,Pkn2,Brd7,Prkdc,Tmod3,Nek6,Ints3,Ezh2,Mrnip,Rptor,Bora,Mre11a,Tubg1,Zfp655,Espl1,Bub1,Hmgb1,Cdc25b,Thap1,Becn1,Mad1l1,Stil,Rps27l,Cdk11b,Crebbp,Cks2,Rad51b,Zw10,Casp2,Chmp1b,Gadd45a,Ticrr,Pnpt1,Gsg2,Cdk2,Cep85,Zwint,Lrp5,Prmt2,Fbxo7,Fzd3,Cdk10,Adam17,Mtbp,Mcph1,Pdxp,Pim1,Cenpf,Terf1,Nbn,Nae1,Cdc73,Hus1,Cdk8,Larp7,Camk2d,Insr,Rpa2,Cdk5rap3,L…
GO:0015980	energy derivation by oxidation of organic compounds	1.46451e-09	-20.3417	177	92	0.0144722	6357	20933	67003,235339,53412,75483,74185,19046,14387,67834,170718,20656,20512,22272,67472,216558,241113,69089,66416,68961,77559,56428,18293,27357,66945,66841,72900,14555,11554,64384,68197,18679,17257,78830,12867,107197,14194,67876,78920,14297,11429,52331,12868,12861,18597,17449,12862,68263,52535,15926,67264,66052,20917,66849,12064,98314,50776,69577,67273,13382,15929,66218,66170,11364,17993,20916,18021,1156…	Uqcrc2,Dlat,Ppp1r3c,Cox8c,Gbe1,Ppp1cb,Gaa,Idh3a,Idh3b,Sod2,Slc1a3,Uqcrq,Mtfr1,Ugp2,Prkag3,Oxa1l,Ndufa7,Phkg2,Agl,Mtch2,Ogdh,Gyg,Sdha,Etfdh,Ndufv2,Gpd1,Adrb1,Sirt3,Ndufc2,Phka1,Mecp2,Slc25a12,Cox7c,Uqcc3,Fh1,Coq10b,Dlst,Fxn,Aco2,Stbd1,Cox8a,Cox6a1,Pdha1,Mdh1,Cox6a2,Pdhb,Mettl17,Idh1,Ndufb8,Sdhc,Suclg2,Ppp1r2,Bdnf,D2hgdh,Polg2,Fastkd3,Ndufa10,Dld,Idh3g,Ndufb9,Chchd5,Acadm,Ndufs4,Sucla2,Nfatc3,Adsl,…
GO:0016072	rRNA metabolic process	1.46451e-09	-20.3417	177	92	0.0144722	6357	20933	72614,52513,67222,64934,69639,78651,216987,106338,67973,14300,67276,66362,59028,12181,20085,320790,67619,67493,68533,56200,70683,67223,69902,66254,57316,18114,276919,30946,66161,57808,70285,55989,27993,67994,100019,140546,24127,66583,100609,18572,67134,71151,74778,105372,207615,60321,19941,108673,50912,65961,50911,228889,67115,69821,224481,213895,76130,69237,18148,98956,66446,78581,100503670,9375…	Pih1d2,Ddx56,Srfbp1,Pes1,Exosc8,Lsm6,Utp6,Nsun3,Mphosph10,Frg1,Eri1,Exosc3,Rcl1,Bop1,Rps19,Chd7,Nob1,Mettl16,Mphosph6,Ddx21,Utp20,Rrp15,Mrto4,Dimt1,C1d,Rrp1,Gemin4,Abt1,Pop4,Rpl35a,Rpf1,Nop58,Imp4,Mrps11,Mdn1,Eri3,Xrn1,Exosc1,Nsun5,Pdcd11,Nop56,Eri2,Rrp7a,Utp15,Wdr37,Wbp11,Rpl26,Ccdc86,Exosc10,Utp3,Exosc9,Ddx27,Rpl14,Mterf4,Tfb1m,Bms1,Las1l,Gtpbp4,Npm1,Nat10,Exosc7,Utp23,Rpl5,Sirt1,Ngdn,Heatr1,Eb…
GO:0009894	regulation of catabolic process	1.74357e-09	-20.1673	453	197	0.0309895	6357	20933	14083,20588,217379,20660,56428,14265,53323,67664,213988,269473,14629,70797,100705,17246,56440,18983,14360,14466,22160,211323,56207,260302,16396,53312,230738,211770,56458,242960,59029,50873,22225,80750,26374,67490,106042,83814,71701,228769,56012,19046,71999,105787,105689,19359,50754,56812,23806,56085,218203,208650,20333,71492,19164,15289,75841,72416,67469,72345,56736,268656,56515,19704,19017,10357…	Ptk2,Smarcc1,Ubxn2a,Sorl1,Mtch2,Fmr1,Ube2k,Rnf125,Tnrc6b,Lrig2,Gclc,Ankib1,Acacb,Mdm2,Snx1,Cnot7,Fyn,Gba,Twist1,Nrg1,Uchl5,Gga3,Itch,Nub1,Zc3h12a,Trib1,Foxo1,Fbxl5,Psmd14,Park2,Usp5,N4bp1,Rfwd2,Ufl1,Prickle1,Nedd4l,Pnpt1,Psmf1,Pgam2,Ppp1cb,Fbxo22,Prkaa1,Mycbp2,Rad23b,Fbxw7,Dnajb2,Arih1,Ubqln1,Mylip,Cblb,Sec22b,Bbs7,Psen1,Hmgb1,Rnf139,Lrpprc,Abhd5,Amer1,Rnf14,Sptlc1,Rnf138,Upf1,Ppargc1a,Xpo1,Mir75…
GO:0007059	chromosome segregation	1.8027e-09	-20.134	243	118	0.0185622	6357	20933	72400,50505,14211,105988,12235,17535,107995,21976,67052,22284,110033,218914,228421,21969,56150,237911,50878,83431,30939,50754,26951,12617,20815,68142,70385,17120,56208,72787,219114,108912,76959,67064,66385,101994,54194,21974,380664,327799,224640,22137,217718,77805,68549,66713,78610,67139,77053,239122,16551,320209,16211,100088,100710,12615,51792,109359,69928,229776,114714,13018,66578,76464,59126,5…	Pinx1,Ercc4,Smc2,Espl1,Bub1,Mre11a,Cdc20,Top3b,Ndc80,Usp9x,Kif22,Wapl,Kif18a,Top1,Mad2l1,Brip1,Stag3,Ndel1,Pttg1,Fbxw7,Zw10,Cenpc1,Srpk1,Ino80,Spdl1,Mad1l1,Becn1,Ndc1,Ska3,Cdca2,Chmp5,Chmp1b,Ppp1r7,Champ1,Akap8l,Top2b,Lemd3,Usp44,Lemd2,Ttk,Nek9,Esco1,Sgol2a,Actr2,Uvrag,Mis12,Sun1,Setdb2,Kif11,Ddx11,Kpnb1,Rcc1,Pds5b,Cenpa,Ppp2r1a,Fam175b,Apitd1,Cdc14a,Rad51c,Ctcf,Mis18a,Knl1,Nek6,Spag5,Smarcad1,Vp…
GO:0007017	microtubule-based process	1.93704e-09	-20.0621	539	228	0.035866	6357	20933	94245,16570,18457,214585,12955,67378,67979,228730,76568,16580,264134,17169,78802,50850,14048,71206,24128,108903,67771,19726,381644,63873,68339,73689,21951,93742,259279,381293,384619,72421,56471,13383,70799,60344,233276,244667,432611,16561,240641,674895,72776,14158,72972,71819,70218,17451,67068,64933,26934,338349,13518,18472,68097,212124,216848,12954,74117,268697,108907,11765,20615,83431,192197,11…	Dtnbp1,Kif3c,Bloc1s6,Spg11,Cryab,Bbs2,Atad1,Kiz,Ift46,Kifc5b,Ttc26,Mark3,Ttc30a1,Spast,Eya1,Katnal2,Xrn2,Tbcd,Arpc5,Rfx3,Cep135,Trpv4,Ccdc88c,Bloc1s2,Tnks,Pard3,Tubgcp3,Kif14,Ccdc155,Ttc30b,Stmn4,Dlg1,Cep192,Fign,Tubgcp5,Disc1,Dnaic2,Kif1b,Kif20b,Nek10,Sass6,Fer,Ccser2,Kif23,Kif18b,Mos,Dynlrb1,Ap3m2,Racgap1,Cntln,Dst,Pafah1b1,Dynll2,Cfap46,Chd3,Cryaa,Actr3,Ccnb1,Nusap1,Ap1g1,Snapin,Ndel1,Bcas3,At…
GO:0051246	regulation of protein metabolic process	2.09713e-09	-19.9827	2417	861	0.135441	6357	20933	68339,192160,93742,65967,66412,28113,20926,52551,16159,22215,58521,52575,66505,78832,18613,83946,17999,17127,74244,270627,19122,224105,50932,231872,30945,12261,94275,67468,17165,106504,244058,12018,14828,237542,13665,19192,211329,26564,66861,68572,242669,207952,11727,73473,19877,19317,20617,74374,11428,140488,56716,16468,12491,68473,19106,108097,13841,67819,192193,68188,14245,72330,13132,17295,21…	Ccdc88c,Casc3,Pard3,Eefsec,Arrdc4,Tinf2,Supt6,Sgta,Il12a,Ube3a,Eid1,Trmt10c,Zmynd11,Cacul1,Pecam1,Phip,Nedd4,Smad3,Atg7,Taf1,Prnp,Pak2,Mink1,Aimp2,Rnf19a,C1qbp,Maged1,Mmd,Mapkapk5,Stk38,Rgma,Bak1,Hspa5,Osbpl8,Eif2s1,Psme3,Ncoa7,Ror2,Dnajc10,Mrpl58,Azin2,Klhl25,Ang,Iws1,Rock1,Qk,Snca,Clec16a,Aco1,Igf2bp3,Mlst8,Jarid2,Cd36,Mob1b,Eif2ak2,Prkab2,Epha7,Derl1,Edem1,Sympk,Lpin1,Klhl40,Dab2,Met,Hip1,Sh3d…
GO:0051186	cofactor metabolic process	2.1409e-09	-19.962	306	142	0.0223376	6357	20933	230027,18618,74080,217707,68646,235339,192185,11733,100900,56075,67834,52064,15488,56012,66454,238505,100705,15357,14450,74114,67876,100198,66154,108156,110208,109129,79464,11674,74637,11655,71883,18648,13350,15929,20916,107885,230163,14148,14732,14751,232087,26363,107766,14297,78038,17434,433182,22171,54198,21351,64602,57028,74104,26897,69568,192166,71365,15369,56748,333433,234309,216188,19895,1…	Coq3,Pemt,Nmnat3,Coq6,Nadk2,Dlat,Nadk,Ank1,Hscb,Pdss1,Idh3a,Coq5,Hsd17b4,Pgam2,Nmnat1,Mtr,Acacb,Hmgcr,Gart,Crot,Coq10b,H6pd,Tmem14c,Mthfd1,Pgd,Mmadhc,Lias,Aldoa,Shpk,Alas1,Coq2,Pgam1,Dgat1,Idh3g,Sucla2,Mthfs,Aldob,Fdx1,Gpam,Gpi1,Mat2a,Btd,Haao,Fxn,Mccc2,Mocs2,Eno1b,Tyms,Snx3,Taldo1,Ireb2,Pdxp,Abcb6,Acot1,Vkorc1l1,Sardh,Pdss2,Hmox2,Nfu1,Gpd1l,Cbr4,Aldh1l2,Rpia,Acot4,Dnmt1,Mdh2,Tpk1,Cpox,Iba57,Nnt,…
GO:0009890	negative regulation of biosynthetic process	2.16927e-09	-19.9489	1427	534	0.0840019	6357	20933	57376,11910,378430,23992,56220,15251,12447,19291,17765,114565,208258,21761,93759,56363,27374,57441,77605,12190,56198,75725,15214,71835,237107,22088,66131,20779,15468,22418,22411,320799,103573,21749,64602,108000,72068,214498,52592,223453,17535,114142,229534,17973,19015,58202,12393,74164,21809,76022,57316,12224,12914,214150,18590,244373,228913,18193,50873,12142,52615,12412,11482,20481,22025,15404,2…	Smarce1,Atf3,Nanos2,Prkra,Zfp386,Hif1a,Ccne1,Purb,Mtf2,Zbtb21,Ankrd33,Morf4l1,Sirt1,Tmeff2,Prmt5,Gmnn,H2afv,Brca2,Heyl,Phf14,Hey2,Lancl2,Gnl3l,Tsg101,Tipin,Src,Prmt2,Wnt5a,Wnt11,Zhx3,Xpo1,Terf1,Ireb2,Cenpf,Cnot2,Cdc73,Brms1l,Dap,Mre11a,Foxp2,Pbxip1,Nck1,Ppard,Nelfb,Runx2,Nfx1,Tgfb3,Gon4l,C1d,Klf5,Crebbp,Ago3,Pdgfa,Erlin2,Zfp217,Nsd1,Park2,Prdm1,Suz12,Cbx1,Acvrl1,Ski,Nr2c1,Hoxa7,Insig1,Aebp2,E2f8,…
GO:0044281	small molecule metabolic process	2.47618e-09	-19.8165	1452	542	0.0852603	6357	20933	59027,56409,18194,17449,110460,18452,229709,74244,66218,102436,13382,50776,14149,72999,407785,15277,12850,242669,50799,224794,19317,234356,20617,103850,11428,67420,12491,27273,66885,13244,14417,108097,269180,11671,14245,80914,14590,229487,18777,30963,18559,27402,102247,52538,11363,14645,27369,55951,22178,56690,109093,60527,107029,78920,16993,108079,67264,22171,66052,81535,108682,76238,272396,1078…	Nampt,Nudt3,Nsdhl,Mdh1,Acat2,P4ha2,Ahcyl1,Atg7,Ndufb9,Lars2,Dld,Polg2,Fdxr,Insig2,Ndufs6,Hk2,Coq7,Azin2,Slc25a13,Enpp4,Qk,Csgalnact1,Snca,Nt5m,Aco1,Far1,Cd36,Pdk4,Acadsb,Degs1,Gad2,Prkab2,Inpp4a,Aldh3a2,Lpin1,Uck2,Ggh,Gatb,Lypla1,Hacd1,Pctp,Pdhx,Gpat4,Acaa2,Acadl,Glul,Dguok,Mpc1,Tyrp1,Mlycd,Rars2,Fads3,Me2,Dlst,Lta4h,Prkaa2,Ndufb8,Tyms,Sdhc,Sgpp1,Gpt2,Grhpr,Tarsl2,Mthfs,Gpam,Csgalnact2,Pgam1,Gsto…
GO:0012501	programmed cell death	2.91079e-09	-19.6548	816	325	0.0511247	6357	20933	19357,74268,60599,231872,12261,22032,17261,57748,11909,17127,23830,18746,245527,330409,224105,19823,22433,21808,71954,74143,218215,16159,110213,20166,54722,240354,13804,12925,19877,66940,76479,109006,13983,26919,12954,19192,15277,66861,12905,74041,12018,59044,26413,12649,68539,13000,67738,79263,16410,13347,21929,13135,22253,215114,13132,68428,67959,22061,13841,170719,14773,15258,12389,69068,11800…	Rad21,Aven,Trp53inp1,Aimp2,C1qbp,Traf4,Mef2d,Jmy,Atf2,Smad3,Capn10,Pkm,Eda2r,Cecr2,Pak2,Rnf7,Xbp1,Tgfb2,Suds3,Opa1,Rnf144b,Il12a,Tmbim6,Rtkn,Dfna5,Malt1,Endog,Crip1,Rock1,Shisa5,Smndc1,Ciapin1,Esr2,Zfp346,Cryaa,Psme3,Hk2,Dnajc10,Cradd,Ddias,Bak1,Rnf130,Mapk1,Chek1,Tmem109,Csnk2a2,Ppid,Trim39,Itgav,Dffa,Tnfaip3,Dad1,Unc5c,Hip1,Dab2,Steap3,Puf60,Trp63,Epha7,Oxr1,Grk5,Hipk2,Cav1,1810011O10Rik,Api5,L…
GO:0018205	peptidyl-lysine modification	3.05317e-09	-19.6071	209	104	0.0163599	6357	20933	217127,15185,320213,50708,56456,107869,66979,208727,52615,22218,214133,217031,228714,328572,226976,12914,109263,71777,50995,107435,18984,17246,20375,103136,64384,239122,78783,20586,208146,64050,77683,73674,17257,107823,52690,15182,73582,69726,100683,14056,213389,24075,170930,11785,28019,11977,74195,230789,104263,100043497,102162,98403,269003,233904,66233,76246,23808,270627,381022,228019,213464,22…	Kat7,Hdac6,Senp5,Hist1h1c,Actl6a,Cth,Pole4,Hdac4,Suz12,Sumo1,Tet2,Tada2a,Csrp2bp,Ep300,Kansl3,Crebbp,Rlf,Ing3,Uba2,Hat1,Por,Mdm2,Spi1,Pwp1,Sirt3,Setdb2,Brpf1,Smarca4,Yeats2,Yeats4,Ehmt1,Wdr75,Mecp2,Whsc1,Setd3,Hdac2,Camkmt,Smyd3,Trrap,Ezh2,Prdm9,Taf10,Sumo2,Apbb1,Ing4,Atp7a,Elp3,Fam76a,Kdm3a,Nat8f7,Taf5l,Zfp451,Sap130,Setd1a,Dmap1,Rtf1,Ash2l,Taf1,Kmt2d,Mettl8,Rbbp5,Setd4,Senp1,Kat2b,Eya1,Epc1,Smy…
GO:0051236	establishment of RNA localization	3.48051e-09	-19.4761	126	70	0.0110115	6357	20933	72416,20422,234733,229279,64930,56488,214597,17149,71844,59015,19386,229512,195236,13680,103573,231042,225027,140488,227699,107939,73473,19317,110809,73666,73192,69736,101187,30959,226747,20926,218210,223527,21951,72124,192160,225160,18148,100042165,103677,56009,433702,14265,69241,103468,66441,54387,69823,14105,269113,66231,71701,54196,66874,445007,66118,68278,107829,72787,223642,72322,76438,3197…	Lrpprc,Shfm1,Ddx19b,Hnrnpa3,Tsc1,Nxt1,Sidt2,Magoh,Nupl1,Nup160,Ranbp2,Smg5,Pom121l2,Ddx19a,Xpo1,Nupl2,Srsf7,Igf2bp3,Nup188,Pom121,Iws1,Qk,Srsf1,Thoc3,Xpot,Nup37,Parp11,Ddx25,Ahctf1,Supt6,Nup153,Eny2,Tnks,Seh1l,Casc3,Thoc1,Npm1,BC005561,Smg6,Alyref2,Ncbp1,Fmr1,Polr2d,Nup107,Magohb,Mcm3ap,Fyttd1,Srsf10,Nup54,Thoc7,Pnpt1,Pabpn1,Ncbp3,Nup85,Sarnp,Ddx39,Thoc5,Ndc1,Zc3h3,Xpo5,Rftn1,Igf2bp2,Nup155,Alkbh…
GO:0010564	regulation of cell cycle process	3.8372e-09	-19.3785	487	208	0.0327198	6357	20933	68067,19878,17535,77744,74370,12235,102774,105988,72611,103733,50754,12531,218914,56208,17120,20460,67941,12537,225326,26951,19363,12914,22404,67064,12366,77011,54673,54394,27214,237877,12545,17685,12454,219103,68549,12236,234736,78610,17246,22137,109333,108961,68729,320209,19090,26992,59126,50875,14056,353170,378430,16337,116733,30949,80280,19891,20620,12211,18761,72290,53869,18148,22629,52679,1…	Mrnip,Rock2,Mre11a,Bora,Rptor,Bub1,Bbs4,Espl1,Zfp655,Tubg1,Fbxw7,Cdc25b,Wapl,Becn1,Mad1l1,Stil,Rps27l,Cdk11b,Pik3c3,Zw10,Rad51b,Crebbp,Wiz,Chmp1b,Casp2,Ticrr,Sh3glb1,Crlf3,Dbf4,Atad5,Cdc7,Msh2,Ccnk,Cenpj,Sgol2a,Bub1b,Rfwd3,Uvrag,Mdm2,Ttk,Pkn2,E2f8,Trim37,Ddx11,Prkdc,Brd7,Nek6,Tmod3,Ezh2,Txlng,Nanos2,Insr,Vps4a,Lcmt1,Cdk5rap3,Rpa2,Plk2,Birc6,Prkcq,Lsm11,Rab11a,Npm1,Ywhah,E2f7,Axin2,Clspn,Brca2,Spi…
GO:1903507	negative regulation of nucleic acid-templated transcription	3.90563e-09	-19.3608	1065	410	0.0644958	6357	20933	22788,20779,219158,12566,81879,236732,15468,22411,22418,103573,320799,192285,20922,68750,108000,22630,23892,72068,12013,234219,214498,71514,217827,28036,52592,17240,223453,22359,72567,67154,11910,57376,229700,17258,20901,56220,329679,12447,15251,233060,19291,17765,68877,114565,208258,21761,330361,93759,27374,57441,77605,56198,17692,19184,75725,15214,71835,13380,22088,22025,228536,208146,12848,243…	Zp3,Src,Ccar2,Cdk2,Tfcp2l1,Rbm10,Prmt2,Wnt11,Wnt5a,Xpo1,Zhx3,Phf21a,Supt4a,Rreb1,Cenpf,Ywhaq,Grem1,Cnot2,Bach1,Helt,Cdc73,Sfpq,Nrde2,Larp7,Brms1l,Mdfi,Dap,Vldlr,Bclaf1,Mtdh,Atf3,Smarce1,Rbm15,Mef2a,Strap,Zfp386,Fnip2,Ccne1,Hif1a,Zfp382,Purb,Mtf2,Maf1,Zbtb21,Ankrd33,Morf4l1,Gcfc2,Sirt1,Prmt5,Gmnn,H2afv,Heyl,Msl3,Psmc5,Phf14,Hey2,Lancl2,Dkk1,Tsg101,Nr2c1,Bahd1,Yeats2,Cops2,Zfp568,Hoxa7,Gclc,Fezf2,E…
GO:0006302	double-strand break repair	3.98552e-09	-19.3406	143	77	0.0121126	6357	20933	19891,19357,52864,14050,93765,69716,70620,13990,17350,14048,66962,57434,21761,76915,384619,12190,75178,67788,68240,22427,319583,15270,227525,191578,66634,20422,15574,71514,226026,69596,19362,71567,12013,56515,27354,212377,20184,237911,70681,22632,17535,56196,50505,70238,109145,28000,22385,59029,109275,72103,225182,98415,16882,19363,211978,231855,68142,78610,67241,233826,77782,72749,330554,104884,…	Rpa2,Rad21,Slx4,Eya3,Ube2n,Trip13,Ube2v2,Smarcad1,Mlh1,Eya1,Swsap1,Xrcc2,Morf4l1,Mnd1,Ccdc155,Brca2,Meiob,Sfr1,Rpa3,Wrn,Lig4,H2afx,Dclre1c,Helq,Mcm8,Shfm1,Hus1,Sfpq,Smc5,Ap5s1,Rad51ap1,Mcm9,Bach1,Rnf138,Nbn,Mms22l,Uimc1,Brip1,Fam175a,Yy1,Mre11a,Tdp2,Ercc4,Rnf168,Gins4,Prpf19,Baz1b,Psmd14,Actr5,Aplf,Rbbp8,Nucks1,Lig3,Rad51b,Zfyve26,Ap5z1,Ino80,Uvrag,Smc6,Palb2,Polq,Tonsl,Fan1,Tdp1,Exd2,Nabp1,Ddx1,…
GO:0051028	mRNA transport	4.58364e-09	-19.2008	101	59	0.00928111	6357	20933	103573,66441,231042,140488,225027,19317,54387,73473,107939,227699,234733,433702,20422,72416,56488,229279,69241,59015,103468,14265,71844,17149,13680,229512,19386,170762,319765,20492,268420,225160,74412,100042165,56009,103677,227720,65246,110809,66231,69736,73666,269113,14105,69823,66118,445007,66874,54196,101187,107829,72787,20926,226747,30959,68278,192160,72124,21951,223642,223527	Xpo1,Magohb,Nupl2,Igf2bp3,Srsf7,Qk,Mcm3ap,Iws1,Pom121,Nup188,Ddx19b,Ncbp1,Shfm1,Lrpprc,Nxt1,Hnrnpa3,Polr2d,Nup160,Nup107,Fmr1,Nupl1,Magoh,Ddx19a,Smg5,Ranbp2,Nup155,Igf2bp2,Slbp,Alkbh5,Thoc1,Gle1,BC005561,Alyref2,Smg6,Nup214,Xpo7,Srsf1,Thoc7,Nup37,Thoc3,Nup54,Srsf10,Fyttd1,Sarnp,Nup85,Ncbp3,Pabpn1,Parp11,Thoc5,Ndc1,Supt6,Ahctf1,Ddx25,Ddx39,Casc3,Seh1l,Tnks,Zc3h3,Eny2
GO:1902679	negative regulation of RNA biosynthetic process	5.26856e-09	-19.0615	1079	414	0.0651251	6357	20933	12447,15251,329679,56220,20901,17258,57376,229700,11910,114565,208258,68877,17765,19291,233060,56198,17692,19184,77605,27374,57441,230908,330361,93759,21761,22088,13380,71835,15214,75725,236732,15468,81879,12566,20779,219158,22788,72068,23892,22630,108000,68750,20922,320799,103573,192285,22411,22418,12013,22359,72567,67154,223453,17240,28036,52592,217827,214498,71514,234219,17973,229534,12014,187…	Ccne1,Hif1a,Fnip2,Zfp386,Strap,Mef2a,Smarce1,Rbm15,Atf3,Zbtb21,Ankrd33,Maf1,Mtf2,Purb,Zfp382,Heyl,Msl3,Psmc5,H2afv,Prmt5,Gmnn,Tardbp,Gcfc2,Sirt1,Morf4l1,Tsg101,Dkk1,Lancl2,Hey2,Phf14,Rbm10,Prmt2,Tfcp2l1,Cdk2,Src,Ccar2,Zp3,Cnot2,Grem1,Ywhaq,Cenpf,Rreb1,Supt4a,Zhx3,Xpo1,Phf21a,Wnt11,Wnt5a,Bach1,Vldlr,Bclaf1,Mtdh,Dap,Mdfi,Larp7,Brms1l,Nrde2,Cdc73,Sfpq,Helt,Nck1,Pbxip1,Bach2,Pitx2,Foxp2,Gon4l,Nfx1,Ru…
GO:0051188	cofactor biosynthetic process	5.46051e-09	-19.0257	127	70	0.0110115	6357	20933	13382,110446,11983,237926,107885,19286,232087,18597,107766,17768,319945,14297,216134,68263,17434,54198,59027,60525,18174,64602,67164,74104,211347,71365,100039707,56748,270685,72199,109006,74450,17025,29807,12892,216792,12850,74080,230027,217707,27402,68646,235339,192185,110391,268566,106564,70456,100900,11733,14151,52064,56075,270076,108147,66454,100705,67876,14450,66812,55951,56690,66154,14287,1…	Dld,Acat1,Atpif1,Rsad1,Mthfs,Pts,Mat2a,Pdha1,Haao,Mthfd2,Flad1,Fxn,Pdxk,Pdhb,Mocs2,Snx3,Nampt,Acss2,Slc11a2,Ireb2,Lipt2,Abcb6,Pank3,Pdss2,Mthfsl,Nfu1,Mthfd1l,Mms19,Ciapin1,Pank2,Alad,Tpk1,Cpox,Iba57,Coq7,Nmnat3,Coq3,Coq6,Pdhx,Nadk2,Dlat,Nadk,Qdpr,Gphn,Ppcs,Mpc2,Hscb,Ank1,Fech,Coq5,Pdss1,Gcdh,Atic,Nmnat1,Acacb,Coq10b,Gart,Ppcdc,Mpc1,Mlycd,Tmem14c,Fpgs,Mmadhc,Mthfd1,Ndufa9,Lias,Nubp1,Alas1,Coq2,Nar…
GO:0031324	negative regulation of cellular metabolic process	6.59334e-09	-18.8372	2209	789	0.124115	6357	20933	226591,20922,68750,22630,52463,23892,27058,11928,22627,192285,77116,76857,236732,16973,22788,219158,12566,81879,28036,17240,67154,22359,72567,264064,234219,72416,71514,217827,13492,13666,12013,225160,68877,11797,12211,233060,17258,269224,20901,329679,108909,329659,229700,69085,13380,20719,338367,19184,17692,330361,230908,230126,243905,66597,14629,59046,208146,17685,12848,236904,228536,73739,69726…	Tiprl,Supt4a,Rreb1,Ywhaq,Tet1,Grem1,Srp9,Atp1a1,Ywhae,Phf21a,Mtmr2,Spopl,Rbm10,Lrp5,Zp3,Ccar2,Cdk2,Tfcp2l1,Larp7,Mdfi,Mtdh,Vldlr,Bclaf1,Cdk8,Helt,Lrpprc,Sfpq,Nrde2,Drd5,Eif2ak3,Bach1,Thoc1,Maf1,Birc2,Birc6,Zfp382,Mef2a,Pask,Strap,Fnip2,Aida,E130311K13Rik,Rbm15,Zcchc9,Dkk1,Serpinb6a,Myo1d,Psmc5,Msl3,Gcfc2,Tardbp,Shb,Zfp568,Trim13,Gclc,Arpp19,Yeats2,Msh2,Cops2,Klhl15,Bahd1,Cby1,Smyd3,Smarcc1,Dnajc1…
GO:0044270	cellular nitrogen compound catabolic process	6.82444e-09	-18.8028	250	119	0.0187195	6357	20933	103677,104625,100715,378430,18573,232449,18575,93685,66446,75901,15254,192160,66422,233033,83965,16434,387609,56045,16341,56409,67207,103135,12457,233789,24128,71723,74133,225929,17350,18578,229709,19819,70640,208718,66094,104776,15369,230753,269378,103850,52830,68276,13804,14852,52463,69125,23959,72068,72662,74108,57028,109778,66373,109075,67229,229512,72544,74167,68209,319618,234699,17149,19704…	Smg6,Cnot6,Papd4,Nanos2,Pde1a,Dera,Pde1c,Entpd7,Exosc7,Dcp1a,Hint1,Casc3,Dctpp1,Samd4b,Enpp5,Itpa,Zhx2,Samhd1,Eif3e,Nudt3,Lsm1,Pan2,Noct,Smg1,Xrn2,Dhx34,Smg8,Patl1,Mlh1,Pde4b,Ahcyl1,Rnaseh1,Dcp2,Dis3l2,Lsm7,Aldh6a1,Hmox2,Thrap3,Ahcy,Nt5m,Pnrc2,Toe1,Endog,Gspt1,Tet1,Cnot8,Nt5e,Cnot2,Dis3,Parn,Pdxp,Blvra,Lsm5,Exosc4,Prpf18,Smg5,Exosc6,Nudt9,Rnaseh2c,Dcp1b,Edc4,Magoh,Upf1,Dcps,Enpp4,Pde2a,Csde1,Rc3h…
GO:0010605	negative regulation of macromolecule metabolic process	7.26228e-09	-18.7406	2207	788	0.123958	6357	20933	56812,218914,237911,18109,12014,13405,18741,24066,66118,67702,66266,30927,66894,319594,12257,59046,14629,66597,243905,230126,12848,17685,208146,228536,18386,236904,387244,14056,20588,69726,73739,20340,68729,109294,13018,54713,74754,12211,11797,225160,68877,233060,329679,108909,20901,269224,17258,229700,329659,13380,20719,17692,19184,230908,330361,22630,23892,52463,20922,226591,68750,77116,18563,1…	Dnajb2,Wapl,Brip1,Mycn,Bach2,Dmd,Pitx2,Spry4,Sarnp,Rnf149,Eapp,Snai3,Wwp2,Hif1an,Tspo,Arpp19,Gclc,Trim13,Zfp568,Shb,Cops2,Msh2,Yeats2,Bahd1,Oprd1,Klhl15,Mirlet7a-1,Ezh2,Smarcc1,Smyd3,Cby1,Glg1,Trim37,Prex2,Ctcf,Fezf2,Dhcr24,Birc6,Birc2,Thoc1,Maf1,Zfp382,Fnip2,Aida,Strap,Pask,Mef2a,Rbm15,E130311K13Rik,Dkk1,Serpinb6a,Msl3,Psmc5,Tardbp,Gcfc2,Ywhaq,Grem1,Tet1,Supt4a,Tiprl,Rreb1,Mtmr2,Pcx,Phf21a,Ywhae…
GO:0051169	nuclear transport	7.30492e-09	-18.7347	227	110	0.0173038	6357	20933	16649,54196,66118,445007,16647,69823,106042,14105,269113,55989,66231,71999,223642,72322,68278,107829,18763,21809,268420,230597,56398,12053,75547,170762,65246,227720,66069,11487,74412,56291,12014,18708,74204,240614,223513,433702,320727,16211,74254,16476,20742,24015,208104,103468,69241,234549,258153,238799,19055,15526,18386,70572,16650,223690,21808,229709,59014,73666,83946,73192,218210,57258,223527…	Kpna4,Pabpn1,Sarnp,Nup85,Kpna2,Fyttd1,Prickle1,Srsf10,Nup54,Nop58,Thoc7,Fbxo22,Zc3h3,Xpo5,Ddx39,Thoc5,Pkd1,Tgfb3,Alkbh5,Zfyve9,Chp1,Bcl6,Akap13,Nup155,Xpo7,Nup214,Snupn,Adam10,Gle1,Styx,Bach2,Pik3r1,Xpo6,Ranbp6,Abra,Ncbp1,Ipo8,Kpnb1,Gpn1,Jun,Sptbn1,Abce1,Mlxip,Nup107,Polr2d,Heatr3,Olfr412,Tnpo1,Ppp3ca,Hspa9,Oprd1,Ipo5,Kpna6,Ankrd54,Tgfb2,Ahcyl1,Rrs1,Thoc3,Phip,Xpot,Nup153,Xpo4,Eny2,Nemf,Arntl,Rbm…
GO:0031399	regulation of protein modification process	9.45721e-09	-18.4765	1578	580	0.091238	6357	20933	18584,94245,18176,13982,71782,54473,54401,21832,72149,21859,70097,218397,12428,26936,232560,14339,18016,58231,71458,12702,17131,381293,65020,74016,26390,277360,66354,54607,17451,100504663,14538,18472,23988,268697,56706,20319,12511,56150,13669,107995,12283,16168,14694,80857,70495,108912,18767,14151,16653,217410,54720,224014,16600,19246,242202,103136,64384,23938,216080,56705,24088,12162,66245,64685…	Pde8a,Dtnbp1,Nras,Esr1,Ankle2,Tollip,Ywhab,Thpo,Strada,Timp3,Sash1,Rasa1,Ccna2,Mprip,Caprin2,Aktip,Nf2,Stk4,Bcor,Socs3,Smad7,Kif14,Zfp110,Phf19,Mapkbp1,Prex1,Snw1,Socs6,Mos,Atg14,Gcnt2,Pafah1b1,Pin1,Ccnb1,Ccnl1,Sfrp2,Cd6,Mad2l1,Eif3a,Cdc20,Cab39,Il15,Rack1,Fgf20,Atp6ap2,Cdca2,Pkia,Fech,Kras,Trib2,Rcan1,Fgd4,Klf4,Ptpn1,Pde5a,Pwp1,Sirt3,Map2k5,Ube2d1,Ranbp9,Tlr2,Bmp7,Hspbp1,Nmi,Sumo2,Taf7,Map3k5,Ad…
GO:0044093	positive regulation of molecular function	1.0487e-08	-18.3731	1244	468	0.0736196	6357	20933	381921,17686,14697,13132,215114,17295,17191,11538,67819,227801,170826,73086,23802,228850,50501,66671,217069,83431,192197,19719,226407,99982,56398,14219,98582,69440,17931,16573,18795,72949,76510,78600,226169,12323,15182,15259,67974,433693,15499,13017,11977,11843,227800,97165,70891,105782,19091,102442,53380,12389,15525,15258,243725,269275,67955,17260,12313,12293,77781,108679,54324,20587,16403,10890…	Taok2,Msh3,Gnb5,Dab2,Hip1,Met,Mbd2,Adnp,Derl1,Dennd1a,Ppargc1b,Rps6ka5,Amfr,Ralgapb,Prok2,Ccnh,Trim25,Ndel1,Bcas3,Rfng,Rab3gap1,Kdm1a,Chp1,Ctgf,Khdc1b,Dennd6b,Ppp1r12a,Kif5b,Plcb1,Ccnt2,Trappc9,Pde6h,Pprc1,Camk2b,Hdac2,Hipk3,Ccny,Akirin2,Hsf1,Ctbp2,Atp7a,Arf4,Rabgap1,Hmgb2,Spdya,Scrib,Prkg1,Dennd4a,Psmd10,Cav1,Hspa4,Hipk2,Ppp1r9a,Acvr1c,Sugt1,Mef2c,Calm1,Cacna2d1,Epm2aip1,Cops8,Arhgef5,Smarcb1,It…
GO:0000075	cell cycle checkpoint	1.13375e-08	-18.2952	148	78	0.0122699	6357	20933	12753,11909,19891,80280,231600,218294,12237,20620,216965,269582,77065,27223,105377,66131,19356,52696,83560,105837,21749,226591,15270,70799,72440,208836,12905,56190,27354,224023,234664,12450,71702,15574,26416,227331,68067,17535,12235,28000,102423,70681,12649,56150,20184,13000,22061,225182,20460,17120,70385,107047,67941,26951,12366,76454,77011,381921,109019,225131,94315,231724,21974,17685,12236,234…	Clock,Atf2,Rpa2,Cdk5rap3,Chfr,Cdc14b,Bub3,Plk2,Taok1,Clspn,Ints7,Trp53bp1,Slf1,Tipin,Rad17,Zwint,Tex14,Mtbp,Terf1,Tiprl,H2afx,Cep192,Rhno1,Fanci,Cradd,Rbm38,Nbn,Klhl22,Nae1,Ccng1,Cdc5l,Hus1,Mapk14,Gigyf2,Mrnip,Mre11a,Bub1,Prpf19,Hinfp,Fam175a,Chek1,Mad2l1,Uimc1,Csnk2a2,Trp63,Rbbp8,Stil,Mad1l1,Spdl1,Psmg2,Rps27l,Zw10,Casp2,Fbxo31,Ticrr,Taok2,Nabp1,Wac,Prcc,Rad9b,Top2b,Msh2,Bub1b,Rfwd3,Rad1,Mdm2,Tt…
GO:0008219	cell death	1.1574e-08	-18.2745	857	336	0.0528551	6357	20933	74268,19357,60599,22032,231872,12261,17261,57748,11909,17127,23830,245527,330409,18746,224105,19823,22433,21808,71954,74143,218215,16159,110213,20166,54722,240354,13804,12925,19877,66940,76479,109006,13983,26919,12954,19192,15277,12905,74041,66861,12018,59044,26413,12649,67738,79263,13000,68539,16410,13347,21929,13135,22253,13132,215114,68428,67959,56470,22061,13841,170719,14773,15258,69068,12389…	Aven,Rad21,Trp53inp1,Traf4,Aimp2,C1qbp,Mef2d,Jmy,Atf2,Smad3,Capn10,Eda2r,Cecr2,Pkm,Pak2,Rnf7,Xbp1,Tgfb2,Suds3,Opa1,Rnf144b,Il12a,Tmbim6,Rtkn,Dfna5,Malt1,Endog,Crip1,Rock1,Shisa5,Smndc1,Ciapin1,Esr2,Zfp346,Cryaa,Psme3,Hk2,Cradd,Ddias,Dnajc10,Bak1,Rnf130,Mapk1,Chek1,Ppid,Trim39,Csnk2a2,Tmem109,Itgav,Dffa,Tnfaip3,Dad1,Unc5c,Dab2,Hip1,Steap3,Puf60,Rgs19,Trp63,Epha7,Oxr1,Grk5,Hipk2,1810011O10Rik,Cav1,…
GO:0006399	tRNA metabolic process	1.22209e-08	-18.2201	158	82	0.0128992	6357	20933	100929,70153,14911,76357,68205,69606,98985,72181,67676,105148,66637,382137,68916,70791,212679,226414,114615,72085,231413,23874,66966,52575,70223,227522,69955,27267,70560,272396,68736,381802,70120,74467,78890,353172,108943,102436,68291,67053,73681,17299,98956,211006,66446,50776,66369,66044,328092,28088,244141,27393,50911,109093,107045,233863,68626,110960,104721,20823,68045,74097,13434,67667,66590,…	Tyw1,2210016F16Rik,Thumpd3,Trmt5,Urm1,Mtfmt,Clp1,Nsun4,Rpp21,Iars,Tsen15,Fdxacb1,Cdkal1,Hars2,Mars2,Dars,Elac1,Osgepl1,Grsf1,Farsb,Trit1,Trmt10c,Nars,Rpp38,Fars2,Cars,Wars2,Tarsl2,Tyw5,Tsen2,Yars2,Pus10,Trmt44,Gars,Trmt10a,Lars2,Mto1,Rpp14,Trmt11,Mettl1,Nat10,Sepsecs,Exosc7,Polg2,Dus2,Dtd1,Dtd2,Rtcb,Nars2,Mrpl39,Exosc9,Rars2,Lars,Gtf3c1,Elac2,Tars,Ddx1,Ssb,2700060E02Rik,Pop7,Trdmt1,Alkbh8,Farsa,T…
GO:0006310	DNA recombination	1.28213e-08	-18.1722	173	88	0.013843	6357	20933	12190,67788,75178,21761,76915,57434,384619,24128,66962,17350,56249,69716,12458,52864,93765,19891,269400,72544,212377,27354,71567,19362,12013,56515,17688,226026,69596,20422,15574,71514,104806,56505,66634,191578,15270,319583,22427,227525,68240,231855,19363,211978,11792,68142,16882,20947,98415,225182,21745,108655,109275,17686,59029,50505,109145,225280,70238,73673,56456,235134,66362,22632,237911,6664…	Brca2,Sfr1,Meiob,Morf4l1,Mnd1,Xrcc2,Ccdc155,Xrn2,Swsap1,Mlh1,Actr8,Trip13,Ccr6,Slx4,Ube2n,Rpa2,Rtel1,Exosc6,Mms22l,Nbn,Mcm9,Rad51ap1,Bach1,Rnf138,Msh6,Smc5,Ap5s1,Shfm1,Hus1,Sfpq,Fancm,Ruvbl1,Mcm8,Helq,H2afx,Lig4,Wrn,Dclre1c,Rpa3,Ap5z1,Rad51b,Zfyve26,Apex1,Ino80,Lig3,Swap70,Nucks1,Rbbp8,Tep1,Foxp1,Actr5,Msh3,Psmd14,Ercc4,Gins4,Ino80c,Rnf168,Rec114,Actl6a,Nfrkb,Exosc3,Yy1,Brip1,Ndnl2,Rnf8,Prkdc,Hmg…
GO:0055086	nucleobase-containing small molecule metabolic process	1.29498e-08	-18.1622	435	187	0.0294164	6357	20933	12868,107766,67126,78038,14297,14923,17434,433182,66052,67264,22171,15254,12862,18102,56045,18648,93685,15929,67273,382985,12064,11717,353172,230163,14751,14148,68550,28080,333433,11564,19895,17448,74167,13433,23971,21351,11637,23959,68833,104776,80752,210044,192185,214133,75483,235339,18950,67003,56749,22169,67834,56012,67365,74080,18618,68870,11949,110074,22247,68646,66416,51797,75894,56428,100…	Cox8a,Haao,Atp5e,Mccc2,Fxn,Guk1,Mocs2,Eno1b,Sdhc,Ndufb8,Tyms,Hint1,Cox6a2,Nme1,Samhd1,Pgam1,Entpd7,Idh3g,Ndufa10,Rrm2b,Bdnf,Ampd3,Gars,Aldob,Gpi1,Fdx1,Tefm,Atp5o,Gpd1l,Adsl,Rpia,Mdh2,Nudt9,Dnmt1,Papss1,Taldo1,Ak2,Nt5e,Pdcl3,Aldh6a1,Fam20c,Adcy2,Nadk,Tet2,Cox8c,Dlat,Pnp,Uqcrc2,Dhodh,Cmpk2,Idh3a,Pgam2,Hdhd1a,Nmnat3,Pemt,Ak8,Atp5c1,Dut,Umps,Nadk2,Ndufa7,Ctps,Adal,Mtch2,H6pd,Macrod2,Adss,Adcyap1,Mthf…
GO:0015931	nucleobase-containing compound transport	1.34804e-08	-18.122	146	77	0.0121126	6357	20933	103677,56009,58246,100042165,18148,225160,218210,223527,21951,192160,72124,30959,226747,20926,101187,110809,73666,73192,69736,227699,107939,73473,19317,225027,140488,231042,103573,19386,229512,13680,195236,17149,71844,59015,64930,229279,56488,214597,71279,72416,20422,234733,67952,227720,66069,65246,13340,74412,20492,268420,76438,319765,170762,223642,72322,242585,68278,107829,72787,71701,54196,445…	Smg6,Alyref2,Slc35b4,BC005561,Npm1,Thoc1,Nup153,Eny2,Tnks,Casc3,Seh1l,Ddx25,Ahctf1,Supt6,Parp11,Srsf1,Thoc3,Xpot,Nup37,Nup188,Pom121,Iws1,Qk,Srsf7,Igf2bp3,Nupl2,Xpo1,Ranbp2,Smg5,Ddx19a,Pom121l2,Magoh,Nupl1,Nup160,Tsc1,Hnrnpa3,Nxt1,Sidt2,Slc29a3,Lrpprc,Shfm1,Ddx19b,Tomm20,Nup214,Snupn,Xpo7,Slc29a2,Gle1,Slbp,Alkbh5,Rftn1,Igf2bp2,Nup155,Zc3h3,Xpo5,Slc35d1,Ddx39,Thoc5,Ndc1,Pnpt1,Pabpn1,Nup85,Sarnp,Nc…
GO:0006913	nucleocytoplasmic transport	1.40724e-08	-18.0791	224	108	0.0169891	6357	20933	223513,240614,320727,433702,16211,16476,74254,24015,20742,69241,234549,103468,208104,258153,238799,15526,19055,70572,18386,16649,66118,445007,54196,69823,106042,16647,55989,66231,269113,14105,223642,71999,72322,68278,107829,18763,230597,268420,21809,56398,12053,170762,75547,227720,65246,66069,11487,74204,18708,12014,74412,56291,64930,16646,56488,67669,20422,234733,353258,26413,19386,195236,320938…	Abra,Ranbp6,Ipo8,Ncbp1,Kpnb1,Jun,Gpn1,Abce1,Sptbn1,Polr2d,Heatr3,Nup107,Mlxip,Olfr412,Tnpo1,Hspa9,Ppp3ca,Ipo5,Oprd1,Kpna4,Sarnp,Nup85,Pabpn1,Fyttd1,Prickle1,Kpna2,Nop58,Thoc7,Nup54,Srsf10,Zc3h3,Fbxo22,Xpo5,Ddx39,Thoc5,Pkd1,Zfyve9,Alkbh5,Tgfb3,Chp1,Bcl6,Nup155,Akap13,Nup214,Xpo7,Snupn,Adam10,Xpo6,Pik3r1,Bach2,Gle1,Styx,Tsc1,Kpna1,Nxt1,Hikeshi,Shfm1,Ddx19b,Ltv1,Mapk1,Ranbp2,Pom121l2,Tnpo3,Ddx19a,An…
GO:0042176	regulation of protein catabolic process	1.56161e-08	-17.975	311	141	0.0221803	6357	20933	30945,11983,108705,17127,17248,17999,270627,74244,21859,13649,70620,12398,22433,216440,11865,545622,21762,14813,17131,22215,218215,52551,14775,244667,13645,66725,74374,242669,105835,244058,19192,65113,76867,23988,268291,79263,72607,69807,18763,59025,56150,93687,110616,77128,22350,14694,11836,27681,21929,59036,22218,72330,54375,27059,13132,19684,217410,19358,192193,18195,70247,52892,17128,12234,10…	Rnf19a,Atpif1,Pttg1ip,Smad3,Mdm4,Nedd4,Taf1,Atg7,Timp3,Egfr,Ube2v2,Cbfa2t3,Xbp1,Os9,Arntl,Ptpn3,Psmd2,Grin2c,Smad7,Ube3a,Rnf144b,Sgta,Gpx1,Disc1,Egf,Lrrk2,Clec16a,Azin2,Sgsm3,Rgma,Psme3,Ndfip1,Rhbdd1,Pin1,Rnf217,Trim39,Usp13,Trim32,Pkd1,Usp14,Mad2l1,Csnk1a1,Atxn3,Crebrf,Ezr,Rack1,Araf,Snf8,Tnfaip3,Dact1,Sumo1,Klhl40,Azin1,Sh3d19,Dab2,Rdx,Trib2,Rad23a,Edem1,Nsf,Psmd1,Sco1,Smad4,Btrc,Zfand2a,Wac,Sn…
GO:0031329	regulation of cellular catabolic process	1.69487e-08	-17.8931	314	142	0.0223376	6357	20933	19246,52892,12234,11818,225131,100494,338359,26874,52033,56690,71169,170930,15499,112405,66245,217351,14555,94190,11502,53380,79263,268291,18763,66887,18458,59025,93687,22350,11836,14694,13347,21929,59036,22218,72330,13132,27059,19684,19358,217410,234594,14775,244667,66725,13645,74374,20617,319801,13804,381305,244058,19192,11983,30945,13010,75420,108705,74244,270627,21859,70620,12398,71723,12183,…	Ptpn1,Sco1,Btrc,Apoh,Wac,Zfand2a,Supv3l1,Abcd2,Pbk,Mlycd,Nbas,Sumo2,Hsf1,Egln1,Hspbp1,Tnrc6c,Gpd1,Ophn1,Adam9,Psmd10,Trim39,Rnf217,Pkd1,Lonp2,Pabpc1,Usp14,Csnk1a1,Ezr,Araf,Rack1,Dffa,Tnfaip3,Dact1,Sumo1,Klhl40,Dab2,Sh3d19,Rdx,Rad23a,Trib2,Cnot1,Gpx1,Disc1,Lrrk2,Egf,Clec16a,Snca,Tigar,Endog,Rc3h1,Rgma,Psme3,Atpif1,Rnf19a,Cst3,Secisbp2,Pttg1ip,Atg7,Taf1,Timp3,Ube2v2,Cbfa2t3,Dhx34,Bpgm,Xbp1,Ptpn3,Sm…
GO:0032268	regulation of cellular protein metabolic process	1.70622e-08	-17.8864	2238	795	0.125059	6357	20933	666048,56505,241035,240354,16963,12946,18174,244667,13383,57810,14158,56013,26413,12905,209354,71943,17149,18217,12954,65113,18125,13983,21898,56693,19823,20300,11640,245527,98732,19060,15239,52036,22032,11983,93765,63873,30959,218215,11835,11477,16341,13626,54324,18441,12398,29806,20587,12380,108679,225929,330938,109331,21808,22433,11481,69131,269275,241568,70207,66917,12389,15467,98496,243725,2…	Trabd2b,Ruvbl1,Pkhd1,Malt1,Xcl1,Cr1l,Slc11a2,Disc1,Dlg1,Cdon,Fer,Srcin1,Mapk1,Cradd,Eif2b1,Tom1l1,Magoh,Ntsr2,Cryaa,Ndfip1,Nos1,Esr2,Tlr4,Crtap,Rnf7,Ccl25,Akap1,Eda2r,Rab3gap2,Ppp5c,Hgs,Ppp6r3,Traf4,Atpif1,Ube2n,Trpv4,Ddx25,Rnf144b,Ar,Acvr1,Eif3e,Eed,Arhgef5,P2ry1,Cbfa2t3,Limd1,Smarcb1,Cast,Cops8,Patl1,Dixdc1,Rnf20,Tgfb2,Xbp1,Acvr2b,Cdk12,Acvr1c,Lrrc4c,Taco1,Chordc1,Cav1,Eif2ak1,Pid1,Ppp1r9a,Sh2d…
GO:0000819	sister chromatid segregation	1.72944e-08	-17.8729	113	63	0.00991034	6357	20933	268697,108907,114714,73804,229776,12615,100710,51792,320209,224023,16211,54141,226026,52563,14841,52696,26934,208718,71819,21974,70218,54194,101994,83560,67139,68549,77805,381293,215387,56208,17120,70385,105513,68142,72124,12617,26951,59014,67064,76959,67052,107995,17535,116733,14211,105988,72400,30939,50754,19357,50878,74847,68942,71175,56150,228421,54392,12237,20479,218914,56399,53869,110033	Ccnb1,Nusap1,Rad51c,Kif2c,Cdc14a,Cenpa,Pds5b,Ppp2r1a,Ddx11,Klhl22,Kpnb1,Spag5,Smc5,Cdc23,Gsg2,Zwint,Racgap1,Dis3l2,Kif23,Top2b,Kif18b,Akap8l,Champ1,Tex14,Mis12,Sgol2a,Esco1,Kif14,Ncaph,Becn1,Mad1l1,Spdl1,Chmp7,Ino80,Seh1l,Cenpc1,Zw10,Rrs1,Chmp1b,Chmp5,Ndc80,Cdc20,Mre11a,Vps4a,Smc2,Espl1,Pinx1,Pttg1,Fbxw7,Rad21,Stag3,Meikin,Chmp2b,Nipbl,Mad2l1,Kif18a,Ncapg,Bub3,Vps4b,Wapl,Akap8,Rab11a,Kif22
GO:0048519	negative regulation of biological process	2.20003e-08	-17.6322	4558	1536	0.241623	6357	20933	56353,18575,17126,14745,22337,20846,12753,67778,70620,17454,20912,71779,19726,216440,12163,11865,11793,223527,67579,13867,13640,57317,66310,223701,13667,66978,13645,12367,208718,66725,17190,12419,225027,11757,12023,319520,68585,109905,209212,56190,56429,52906,208836,210530,56426,19273,18933,18763,22632,224826,381038,60530,170765,22222,22350,13614,54343,59036,66042,231474,22218,102060,21415,14362,…	Rybp,Pde1c,Smad2,Lpar1,Vdr,Stat1,Clock,Zfp639,Ube2v2,Mov10,Stxbp3,March8,Rfx3,Os9,Bmp8a,Arntl,Atg5,Eny2,Cpeb4,Erbb3,Efna5,Srsf4,Dpy30,Mkl1,Eif2b4,Luc7l,Egf,Casp3,Dis3l2,Lrrk2,Mbd1,Cbx5,Srsf7,Prdx3,Barx2,Dusp4,Rtn4,Rap1a,Osgin2,Rbm38,Dpt,Ahi1,Fanci,P3h2,Pdcd10,Ptpru,Prrx1,Pkd1,Yy1,Ubr2,Parl,Fignl1,Ripply3,Ubr1,Ezr,Edn1,Atf7ip,Dact1,Sostdc1,Paqr3,Sumo1,Gadd45gip1,Tcf7l1,Fzd1,Bcl10,Hdac1,Bag3,Apex1,…
GO:0009117	nucleotide metabolic process	2.46411e-08	-17.5188	375	164	0.0257983	6357	20933	80752,210044,23959,11637,21351,23971,74167,17448,11564,19895,333433,28080,68550,14751,14148,353172,230163,11717,382985,12064,67273,15929,18648,56045,18102,12862,22171,15254,67264,66052,17434,433182,14923,14297,78038,67126,107766,12868,12867,68055,14450,74114,107197,17685,11946,15357,381101,18605,14916,68106,66454,73694,74637,53893,11674,110208,54598,108156,11516,11566,100198,56428,75894,51797,686…	Fam20c,Adcy2,Nt5e,Ak2,Taldo1,Papss1,Nudt9,Mdh2,Adsl,Rpia,Gpd1l,Atp5o,Tefm,Gpi1,Fdx1,Gars,Aldob,Ampd3,Rrm2b,Bdnf,Ndufa10,Idh3g,Pgam1,Samhd1,Nme1,Cox6a2,Tyms,Hint1,Ndufb8,Sdhc,Mocs2,Eno1b,Guk1,Fxn,Mccc2,Atp5e,Haao,Cox8a,Cox7c,Atp5s,Gart,Crot,Uqcc3,Msh2,Atp5a1,Hmgcr,Dnph1,Enpp1,Guca2b,Nt5c3b,Nmnat1,Ndufaf7,Shpk,Nudt5,Aldoa,Pgd,Calcrl,Mthfd1,Adcyap1,Adss,H6pd,Mtch2,Adal,Ctps,Nadk2,Ndufa7,Umps,Atp5c1,…
GO:0006914	autophagy	2.58357e-08	-17.4715	175	88	0.013843	6357	20933	228361,68505,72238,94221,110213,108079,11793,67727,67391,66840,22433,52331,67006,67443,54636,77040,73683,229722,23830,74244,66734,66169,116733,54473,20479,235040,60599,71742,75964,21425,74159,70381,13853,223453,73205,100226,319801,69754,75909,74374,100504663,22224,51897,66725,66320,66048,53611,271564,68943,72018,66795,56208,18704,225326,105193,19335,74781,50873,29869,244962,56085,74769,67526,1916…	Ambra1,Vps51,Tbc1d5,Gopc,Tmbim6,Prkaa2,Atg5,Stx17,Fundc2,Wdr45b,Xbp1,Stbd1,Cisd2,Map1lc3b,Wdr45,Atg16l1,Atg16l2,5330417C22Rik,Capn10,Atg7,Map1lc3a,Tomm7,Vps4a,Tollip,Vps4b,Atg4d,Trp53inp1,Ulk3,Trappc8,Tfeb,Acbd5,Tecpr1,Epm2a,Dap,3110043O21Rik,Stx12,Tigar,Fbxo7,Vmp1,Clec16a,Atg14,Usp10,Atg13,Lrrk2,Tmem208,Emc6,Vti1a,Vps13a,Pink1,Fundc1,Atg10,Becn1,Pik3c2a,Pik3c3,Nhlrc1,Rab23,Wipi2,Park2,Ulk2,Snx14…
GO:0032259	methylation	2.62491e-08	-17.4556	260	121	0.0190341	6357	20933	69962,238505,72096,239122,218214,103136,101148,140483,403183,20586,77683,100609,52690,67148,17257,76781,107823,14056,73582,15182,69726,102182,232187,213389,104263,13018,73694,18618,60532,210529,230027,78796,68043,73419,50708,72843,216292,212728,20230,106338,54343,209584,52615,214133,319822,12142,18193,23942,57295,69934,13434,52064,67493,239706,74753,67667,22715,66254,109263,72167,14852,66310,6739…	Mettl18,Mtr,Mettl10,Setdb2,Kdm1b,Pwp1,Bmt2,Hnmt,Mettl21e,Smarca4,Ehmt1,Nsun5,Setd3,Fam103a1,Mecp2,Mettl4,Whsc1,Ezh2,Camkmt,Hdac2,Smyd3,Prmt9,Smyd5,Prdm9,Kdm3a,Ctcf,Ndufaf7,Pemt,Wtap,Mettl14,Coq3,Zcchc4,Eef1akmt1,Armt1,Hist1h1c,Prdm4,Mettl25,Tarbp1,Satb1,Nsun3,Atf7ip,Tyw3,Suz12,Tet2,Smyd4,Prdm1,Nsd1,Mta2,Icmt,Trmt10b,Trdmt1,Coq5,Mettl16,Mettl22,Trmo,Alkbh8,Zfp57,Dimt1,Rlf,Thumpd2,Gspt1,Dpy30,Rnmtl…
GO:0000070	mitotic sister chromatid segregation	3.67997e-08	-17.1178	89	52	0.00817996	6357	20933	14841,52563,26934,52696,71819,208718,83560,101994,70218,54194,67139,268697,108907,100710,51792,12615,229776,73804,16211,224023,54141,107995,67052,116733,105988,14211,72400,30939,56150,71175,68942,20479,12237,54392,228421,110033,218914,53869,56399,56208,215387,381293,105513,70385,17120,68142,72124,26951,12617,67064,59014,76959	Gsg2,Cdc23,Racgap1,Zwint,Kif23,Dis3l2,Tex14,Champ1,Kif18b,Akap8l,Mis12,Ccnb1,Nusap1,Pds5b,Ppp2r1a,Cenpa,Cdc14a,Kif2c,Kpnb1,Klhl22,Spag5,Cdc20,Ndc80,Vps4a,Espl1,Smc2,Pinx1,Pttg1,Mad2l1,Nipbl,Chmp2b,Vps4b,Bub3,Ncapg,Kif18a,Kif22,Wapl,Rab11a,Akap8,Becn1,Ncaph,Kif14,Chmp7,Spdl1,Mad1l1,Ino80,Seh1l,Zw10,Cenpc1,Chmp1b,Rrs1,Chmp5
GO:0006753	nucleoside phosphate metabolic process	4.52428e-08	-16.9112	386	167	0.0262703	6357	20933	14149,231327,13382,110446,232449,18575,114640,18573,66218,18746,12183,18578,18655,319945,18597,12861,17449,56409,59027,66422,66646,83965,13178,16434,68263,26430,11975,103850,66152,20133,66725,11964,22273,20617,211347,74450,207728,12869,50799,15277,12850,407785,13807,12858,266690,27402,21881,11966,67464,22272,18115,18641,229363,21871,14571,106564,70456,80914,76654,268566,108147,67059,170718,107569…	Fdxr,Ppat,Dld,Acat1,Dera,Pde1c,Pth2,Pde1a,Ndufb9,Pkm,Bpgm,Pde4b,Pgk1,Flad1,Pdha1,Cox6a1,Mdh1,Nudt3,Nampt,Dctpp1,Rpe,Enpp5,Dck,Itpa,Pdhb,Parg,Atp6v0a1,Nt5m,Uqcr10,Rrm1,Lrrk2,Atp6v1a,Uqcrc1,Snca,Pank3,Pank2,Pde2a,Cox8b,Slc25a13,Hk2,Coq7,Ndufs6,Eno2,Cox5a,Cyb5r4,Pdhx,Tkt,Atp6v1b2,Entpd4,Uqcrq,Nnt,Pfkl,Gmps,Atp6v0a2,Gpd2,Ppcs,Mpc2,Uck2,Upp2,Gphn,Atic,Ola1,Idh3b,Nt5c3,Atp5g1,Atp5k,Pde5a,Adpgk,Ndufc2,P…
GO:0032784	regulation of DNA-templated transcription, elongation	4.875e-08	-16.8366	46	32	0.00503382	6357	20933	7.34737e+168	Iws1,Wdr61,Zfp326,Ccar2,Supt4a,Rnf8,Tceanc,Map2k1,Ezh2,Gtf2f1,Eloc,Gtf2f2,Ell2,Ercc6,Cdc73,Nelfa,Rnf168,Tcea1,Supt16,Leo1,Thoc1,Rtf1,Nelfb,Eapp,Supt6,Thoc5,Ctr9,Cbx7,Zmynd11,Pou4f1,Supt5,Dab2
GO:0009892	negative regulation of metabolic process	5.12159e-08	-16.7872	2411	847	0.133239	6357	20933	207667,106931,353310,15499,26987,112405,19223,71169,15259,15182,20239,19091,53380,97165,19696,94190,58230,26904,98496,15467,12389,66917,17260,241568,321006,17686,108655,53975,69034,18996,236690,69009,22061,73086,20947,114716,170826,15465,11538,245007,17191,170719,19650,170644,100037258,12649,100316783,99982,56398,12053,79263,53872,16410,18795,67973,68036,23967,13347,14219,212276,77128,98985,67773…	Skor1,Kctd1,Zfp703,Hsf1,Eif4e2,Egln1,Ptgis,Nbas,Hipk3,Hdac2,Atxn2,Prkg1,Psmd10,Hmgb2,Rel,Ophn1,Rnf8,Sh2d1b1,Pid1,Eif2ak1,Cav1,Chordc1,Mef2c,Lrrc4c,Vprbp,Msh3,Foxp1,Ddx20,Nupr1l,Pou4f1,Nyx,Thap7,Trp63,Rps6ka5,Swap70,Spred2,Ppargc1b,Hrh1,Adnp,Zbtb38,Mbd2,Oxr1,Rbl1,Ubn1,Dnajc3,Chek1,Mir1b,Kdm1a,Chp1,Bcl6,Trim39,Caprin1,Itgav,Plcb1,Mphosph10,Zfp706,Osr1,Dffa,Ctgf,Zfp748,Crebrf,Clp1,Kat8,Crtap,Esr2,Tl…
GO:0022904	respiratory electron transport chain	6.27224e-08	-16.5845	61	39	0.00613497	6357	20933	1.33827e+196	Dld,Ndufa10,Uqcrq,Polg2,Slc1a3,Sod2,Bdnf,D2hgdh,Ndufa7,Ndufb9,Cox8c,Cox6a1,Cox8a,Uqcrc2,Ndufb8,Sdhc,Cox6a2,Ndufc2,Pink1,Uqcc3,Uqcrc1,Snca,Cox7c,Mecp2,Uqcr10,Slc25a12,Cox8b,Slc25a13,Mtch2,Ndufa5,Gpd1,Ndufv2,Ppargc1a,Ndufs6,Cox5a,Sdha,Etfdh,Immp2l,Coq7
GO:0006997	nucleus organization	6.54801e-08	-16.5415	116	63	0.00991034	6357	20933	68585,30934,217379,28193,106298,15081,20017,18472,15463,237542,97165,104263,103468,67878,13400,70769,68053,70069,109229,83984,77053,54194,107939,380664,240832,69482,224640,101187,66817,72135,22218,93684,386649,76959,21408,269113,71177,67064,218210,94221,22687,72124,105513,226747,30931,72787,70699,230908,21958,230709,20085,20479,71782,68942,12649,83431,170762,21821,64934,116733,64009,68968,50850	Rtn4,Tor1b,Ubxn2a,Reep3,Rrn3,H3f3b,Polr1b,Pafah1b1,Agfg1,Osbpl8,Hmgb2,Kdm3a,Nup107,Tmem33,Dmpk,Nolc1,Ubxn2b,H1fnt,Fam118b,Tssk6,Sun1,Akap8l,Pom121,Lemd3,Tor1aip2,Nup35,Lemd2,Parp11,Tmem170,Pygo1,Sumo1,Selenof,Nsfl1c,Chmp5,Zfp354a,Nup54,Asun,Chmp1b,Nup153,Gopc,Zpr1,Seh1l,Chmp7,Ahctf1,Tor1a,Ndc1,Nup205,Tardbp,Tnp1,Zmpste24,Rps19,Vps4b,Ankle2,Chmp2b,Chek1,Ndel1,Nup155,Ift88,Pes1,Vps4a,Syne1,Cdan1,Sp…
GO:0006282	regulation of DNA repair	6.61248e-08	-16.5317	81	48	0.00755073	6357	20933	232314,26430,77782,60344,107823,18294,236904,22160,319801,75686,12611,21853,117599,234371,14051,19362,244694,269400,320209,58230,11785,20184,99982,319604,12649,70681,19891,51869,18538,50755,93765,14050,70620,13649,68067,230484,71991,15289,70238,60530,226151,18950,57321,14048,105377,12006,93759,11792	Ppp4r2,Parg,Polq,Fign,Whsc1,Ogg1,Klhl15,Twist1,Tigar,Nudt16,Cebpg,Timeless,Helb,Tmem161a,Eya4,Rad51ap1,Kdm4d,Rtel1,Ddx11,Rnf8,Apbb1,Uimc1,Kdm1a,Fam168a,Chek1,Fam175a,Rpa2,Rif1,Pcna,Fbxo18,Ube2n,Eya3,Ube2v2,Egfr,Mrnip,Usp1,Ercc8,Hmgb1,Rnf168,Fignl1,Fam178a,Pnp,Terf2ip,Eya1,Slf1,Axin2,Sirt1,Apex1
GO:1901657	glycosyl compound metabolic process	7.01729e-08	-16.4723	269	123	0.0193487	6357	20933	18648,232449,67273,110446,13382,12064,11717,18746,68736,230163,14751,66218,68550,12868,110198,12861,67126,229709,18655,78038,14297,12183,13178,14923,433182,17434,66052,67264,12862,56409,18102,11975,11637,23959,13435,26430,20617,22273,68833,211347,66725,11964,66152,80752,16591,79455,269378,50799,28080,12869,234309,74450,11564,224794,13807,74167,13433,12858,407785,15277,12850,23971,107227,18537,222…	Pgam1,Dera,Ndufa10,Acat1,Dld,Bdnf,Ampd3,Pkm,Tyw5,Aldob,Gpi1,Ndufb9,Tefm,Cox8a,Akr7a5,Cox6a1,Atp5e,Ahcyl1,Pgk1,Mccc2,Fxn,Bpgm,Dck,Guk1,Eno1b,Mocs2,Sdhc,Ndufb8,Cox6a2,Nudt3,Nme1,Atp6v0a1,Ak2,Nt5e,Dnmt3a,Parg,Snca,Uqcrc1,Pdcl3,Pank3,Lrrk2,Atp6v1a,Uqcr10,Fam20c,Kl,Pdcl2,Ahcy,Slc25a13,Atp5o,Cox8b,Cbr4,Pank2,Adsl,Enpp4,Eno2,Nudt9,Dnmt1,Cox5a,Ndufs6,Hk2,Coq7,Papss1,Macrod1,Pcmt1,Uqcrq,Pemt,Entpd4,Atp6v1…
GO:2001020	regulation of response to DNA damage stimulus	7.45488e-08	-16.4118	158	80	0.0125846	6357	20933	22038,55982,56428,18779,53380,12505,244694,14265,11785,320209,58230,234736,77782,17246,107823,18294,236904,75686,22160,74996,18004,117599,21853,12952,18950,69076,68428,57321,20583,114716,107829,106052,241627,11792,20184,99982,70681,12649,18538,50755,73419,69807,51869,17210,230484,68067,12778,15289,60530,70238,15387,67872,72567,19362,14051,234371,269400,66143,26430,232314,60344,219158,319801,12611…	Plscr1,Paxip1,Mtch2,Pla2r1,Psmd10,Cd44,Kdm4d,Fmr1,Apbb1,Ddx11,Rnf8,Rfwd3,Polq,Mdm2,Whsc1,Ogg1,Klhl15,Nudt16,Twist1,Usp47,Nek1,Helb,Timeless,Cry1,Pnp,Triap1,Steap3,Terf2ip,Snai2,Spred2,Thoc5,Fbxo4,Wdr76,Apex1,Uimc1,Kdm1a,Fam175a,Chek1,Pcna,Fbxo18,Armt1,Trim32,Rif1,Mcl1,Usp1,Mrnip,Ackr3,Hmgb1,Fignl1,Rnf168,Hnrnpk,Nsmce4a,Bclaf1,Rad51ap1,Eya4,Tmem161a,Rtel1,Eef1e1,Parg,Ppp4r2,Fign,Ccar2,Tigar,Cebpg,…
GO:0009116	nucleoside metabolic process	8.06854e-08	-16.3327	251	116	0.0182476	6357	20933	224794,11564,74450,12869,28080,50799,18537,107227,15277,23971,12850,407785,74167,12858,13433,13807,26430,13435,23959,11637,11975,269378,80752,79455,66152,11964,66725,211347,68833,22273,20617,12183,14297,18655,229709,78038,67126,12861,12868,18102,56409,12862,67264,66052,433182,17434,14923,13178,11717,12064,67273,13382,110446,232449,18648,68550,66218,14751,230163,18746,11516,11566,72899,75894,18293…	Enpp4,Adsl,Pank2,Cox8b,Atp5o,Slc25a13,Pcmt1,Macrod1,Hk2,Papss1,Coq7,Ndufs6,Nudt9,Cox5a,Dnmt1,Eno2,Parg,Dnmt3a,Nt5e,Ak2,Atp6v0a1,Ahcy,Fam20c,Pdcl2,Uqcr10,Atp6v1a,Lrrk2,Pank3,Pdcl3,Uqcrc1,Snca,Bpgm,Fxn,Pgk1,Ahcyl1,Mccc2,Atp5e,Cox6a1,Cox8a,Nme1,Nudt3,Cox6a2,Ndufb8,Sdhc,Eno1b,Mocs2,Guk1,Dck,Ampd3,Bdnf,Ndufa10,Dld,Acat1,Dera,Pgam1,Tefm,Ndufb9,Gpi1,Aldob,Pkm,Adcyap1,Adss,Macrod2,Adal,Ogdh,Cmpk1,Mtch2,D…
GO:0046700	heterocycle catabolic process	8.87172e-08	-16.2378	254	117	0.0184049	6357	20933	18573,378430,100715,103677,104625,75901,66446,18575,232449,93685,56409,67207,387609,56045,16341,233033,16434,83965,15254,192160,66422,225929,17350,18578,229709,74133,12457,103135,233789,24128,71723,13804,269378,103850,68276,52830,66094,15369,104776,230753,19819,208718,70640,109778,57028,74108,109075,66373,67229,72662,69125,52463,23959,14852,72068,234699,17149,19704,68209,319618,74167,72544,229512…	Pde1a,Nanos2,Papd4,Smg6,Cnot6,Dcp1a,Exosc7,Pde1c,Dera,Entpd7,Nudt3,Lsm1,Zhx2,Samhd1,Eif3e,Samd4b,Itpa,Enpp5,Hint1,Casc3,Dctpp1,Patl1,Mlh1,Pde4b,Ahcyl1,Smg8,Noct,Pan2,Smg1,Xrn2,Dhx34,Endog,Ahcy,Nt5m,Toe1,Pnrc2,Lsm7,Hmox2,Aldh6a1,Thrap3,Rnaseh1,Dis3l2,Dcp2,Blvra,Pdxp,Parn,Exosc4,Lsm5,Prpf18,Dis3,Cnot8,Tet1,Nt5e,Gspt1,Cnot2,Edc4,Magoh,Upf1,Rnaseh2c,Dcp1b,Nudt9,Exosc6,Smg5,Aldh1l2,Pde2a,Enpp4,Csde1,R…
GO:0022900	electron transport chain	9.4715e-08	-16.1724	66	41	0.00644958	6357	20933	6.72647e+206	Ndufb8,Sdhc,Cox6a2,Cox8a,Cox8c,Cox6a1,Uqcrc2,Ndufa7,Ndufb9,Ndufs4,Uqcrq,Ndufa10,Dld,Bdnf,Sod2,D2hgdh,Slc1a3,Polg2,Cox5a,Etfdh,Sdha,Ppargc1a,Gpd1,Ndufv2,Ndufs6,Coq7,Immp2l,Slc25a13,Mtch2,Cox8b,Ndufa5,Snca,Uqcrc1,Uqcc3,Mecp2,Uqcr10,Slc25a12,Cox7c,Cr1l,Ndufc2,Pink1
GO:0043623	cellular protein complex assembly	9.47377e-08	-16.1722	305	136	0.0213937	6357	20933	240614,229211,16211,69928,53380,66482,68197,12389,67139,103967,68185,17128,11764,52892,15525,66700,269275,67048,227753,70572,71769,66541,13132,215114,13858,17191,107047,76467,67105,83431,67952,21871,67151,56046,230649,71902,68585,20422,83679,319876,12954,66998,26886,70799,233276,432611,67878,11975,68041,66152,11908,66817,108679,108903,218210,52535,63873,75705,74143,259279,12955,17126,69487,14225,…	Ranbp6,Acad9,Kpnb1,Apitd1,Psmd10,Exoc2,Ndufc2,Cav1,Mis12,Dnm3,Coa4,Smad4,Ap1b1,Sco1,Hspa4,Chmp3,Acvr1c,Vma21,Gsn,Ipo5,Bbs10,Immp1l,Dab2,Hip1,Eps15,Mbd2,Psmg2,Msrb2,Timm21,Ndel1,Tomm20,Atp6v0a2,Psmd9,Uqcc1,Atpaf1,Cand1,Rtn4,Shfm1,Pde4dip,Cobll1,Cryaa,Psmd5,Cenph,Cep192,Tubgcp5,Dnaic2,Tmem33,Atp6v0a1,Mid1ip1,Uqcr10,Atf1,Tmem170,Cops8,Tbcd,Nup153,Mettl17,Trpv4,Eif4b,Opa1,Tubgcp3,Cryab,Smad2,Ndufaf5,…
GO:0006508	proteolysis	9.54061e-08	-16.1651	1040	393	0.0618216	6357	20933	232539,52348,231093,11797,74315,329777,239833,636808,108687,19185,73218,116733,231672,65973,71991,234847,18786,19822,68876,66624,22088,70160,386649,11593,192169,19184,170707,93759,74256,69597,57296,66320,58799,66212,22019,76857,22214,12402,240334,13482,227334,215351,67923,19155,56438,76800,67269,109815,207304,109552,26445,56812,242377,76302,12488,19359,225743,28000,67138,56529,22284,218203,93836,…	Klhl42,Vps37a,Agbl5,Birc2,Rnf145,Pigk,Lmln,Cntnap5a,Edem2,Psmd4,Sppl2b,Vps4a,Fbxw8,Asph,Ercc8,Spg7,Plaa,Rnf4,Xrcc6bp1,Spcs2,Tsg101,Vps36,Nsfl1c,Aga,Ufsp2,Psmc5,Usp48,Sirt1,Cyld,Afg3l2,Psmd8,Tmem208,Crbn,Sec61b,Tpp2,Spopl,Ube2h,Cbl,Pcyox1l,Dpp4,Usp40,Senp6,Eloc,Npepps,Rbx1,Usp42,Agtpbp1,Selenos,Hectd1,Sri,Psmb2,Dnajb2,Pm20d2,Pcnp,Cd2ap,Rad23b,Rnf165,Prpf19,Herc6,Sec11a,Usp9x,Mylip,Rnf111,Uggt2,Ned…
GO:0071822	protein complex subunit organization	9.70728e-08	-16.1478	931	356	0.0560013	6357	20933	54401,98878,14225,110446,108853,17126,12955,50850,17993,11364,74006,22388,20912,72149,246738,56298,330189,67804,66817,23874,19305,381293,56471,66422,68041,11975,67878,11908,226823,69482,192192,66152,58800,66725,14660,18391,70218,319876,50907,64930,68585,56429,268697,22661,15185,20319,12972,107869,56046,230649,67151,114896,12042,12833,268566,66590,70356,11764,77782,319158,15368,71769,72475,227753,…	Ywhab,Ehd4,Fkbp1a,Acat1,Mtrf1l,Smad2,Cryab,Spast,Ndufs4,Acadm,Dnm1l,Wdr1,Stxbp3,Strada,Dnajc28,Atl2,Tmem120b,Snx2,Tmem170,Farsb,Pex5,Kif14,Stmn4,Dctpp1,Mid1ip1,Atp6v0a1,Tmem33,Atf1,Kctd3,Nup35,Shkbp1,Uqcr10,Trpm7,Lrrk2,Gls,Sigmar1,Kif18b,Cobll1,Preb,Tsc1,Rtn4,Dpt,Ccnb1,Zfp148,Hdac6,Sfrp2,Cryz,Cth,Uqcc1,Atpaf1,Psmd9,Afg3l1,Bcl10,Col6a1,Gphn,Farsa,St13,Ap1b1,Polq,Hist1h4i,Hmox1,Bbs10,Ssbp3,Gsn,Micu…
GO:1901135	carbohydrate derivative metabolic process	1.10644e-07	-16.0169	777	303	0.047664	6357	20933	107569,216395,192193,242585,15211,11677,381510,103963,80914,63828,21871,67466,13135,18641,268880,11843,11977,14555,22239,27369,70316,66812,433931,75686,14187,13200,68197,16795,215494,56409,17300,18655,18578,229709,74653,19089,18746,54613,66218,13382,20441,54371,231327,407785,81003,13807,72136,18537,15277,12850,12869,56174,50799,224794,80286,234356,22273,20617,103850,50877,20133,74493,64136,338337…	Nt5c3,Tmem5,Edem1,Slc35d1,Hexa,Akr1b3,Dpy19l4,Rpn1,Uck2,Fn3k,Atp6v0a2,Pdcl,Dad1,Pfkl,Xxylt1,Arf4,Atp7a,Gpd1,Ugt8a,Dguok,Ndufab1,Ppcdc,Pigg,Nudt16,Akr1b8,Ddost,Ndufc2,Large1,Pomgnt2,Nudt3,Foxc1,Pgk1,Pde4b,Ahcyl1,Pomk,Prkcsh,Pkm,St3gal6,Ndufb9,Dld,St3gal3,Chst2,Ppat,Ndufs6,Trim23,Eno2,Chst14,Pcmt1,Hk2,Coq7,Cox8b,Nagk,Slc25a13,Enpp4,Tusc3,Csgalnact1,Uqcrc1,Snca,Nt5m,Neu3,Rrm1,Tnks2,Sdf2l1,Cog3,Gxylt…
GO:0010212	response to ionizing radiation	1.27289e-07	-15.8768	120	64	0.0100676	6357	20933	70238,60530,68067,11852,68539,20319,446101,70681,105787,20656,20184,99982,68142,19363,106052,22061,98415,20583,26374,77011,13197,18950,231724,209456,17685,18004,109019,234736,19355,19090,58230,244694,114714,229543,235559,22596,14375,235323,12753,71991,14050,12955,21353,71175,12190,77065,57434,93759,14048,19822,319801,227525,14775,56349,15270,319583,22427,12018,72440,74041,19362,26416,319955,15574	Rnf168,Fignl1,Mrnip,Rhob,Tmem109,Sfrp2,Xrra1,Fam175a,Prkaa1,Sod2,Uimc1,Kdm1a,Ino80,Rad51b,Fbxo4,Trp63,Nucks1,Snai2,Rfwd2,Ticrr,Gadd45a,Pnp,Rad9b,Trp53bp2,Msh2,Nek1,Nabp1,Rfwd3,Rad1,Prkdc,Rnf8,Kdm4d,Rad51c,Ints3,Topbp1,Xrcc5,Xrcc6,Usp28,Clock,Ercc8,Eya3,Cryab,Tank,Nipbl,Brca2,Ints7,Xrcc2,Sirt1,Eya1,Rnf4,Tigar,Dclre1c,Gpx1,Net1,H2afx,Lig4,Wrn,Bak1,Rhno1,Ddias,Rad51ap1,Mapk14,Ercc6,Hus1
GO:0051129	negative regulation of cellular component organization	1.69349e-07	-15.5913	621	248	0.0390121	6357	20933	15381,12343,71458,108903,18613,78798,20587,11835,13640,16169,18645,19305,381293,74143,28113,20926,74201,20350,21951,11793,63873,13982,14745,18222,17450,106522,94245,12237,235041,74244,19089,20846,103677,26914,56691,18472,68585,64930,13837,71943,74117,224023,269400,244058,68943,231532,68041,19062,70799,63985,14775,74493,16468,319801,214685,20617,74374,54723,65970,50876,17451,83560,19042,66725,1456…	Hnrnpc,Capza2,Bcor,Tbcd,Pecam1,Eml4,Smarcb1,Ar,Efna5,Il15ra,Pfn2,Pex5,Kif14,Opa1,Tinf2,Supt6,Cep97,Sema3f,Tnks,Atg5,Trpv4,Esr1,Lpar1,Numb,Morc1,Pkdcc,Dtnbp1,Bub3,Kank2,Atg7,Prkcsh,Stat1,Smg6,H2afy,Dnajb8,Pafah1b1,Rtn4,Tsc1,Epha3,Tom1l1,Actr3,Klhl22,Rtel1,Rgma,Pink1,Arhgap24,Mid1ip1,Inpp5k,Cep192,Gmfb,Gpx1,Tnks2,Jarid2,Tigar,Chadl,Snca,Clec16a,Tfip11,Lima1,Tmod2,Mos,Tex14,Ppm1a,Lrrk2,Gdi1,Rock1,Tr…
GO:0006892	post-Golgi vesicle-mediated transport	1.74849e-07	-15.5593	76	45	0.00707881	6357	20933	107338,16558,19325,13858,99371,229593,17846,57437,53612,67378,210148,234678,52028,11735,20660,76983,66460,74051,11736,53330,68365,54214,231580,217517,17918,66482,20742,66352,11765,98710,20661,93835,69940,211556,22135,18195,78287,22319,226422,53611,66629,70028,26422,226541,16783	Gbf1,Kif16b,Rab10,Eps15,Arfgef2,Golph3l,Commd1,Golga7,Vti1b,Bbs2,Slc30a6,D230025D16Rik,Bbs1,Ank3,Sorl1,Scfd1,Sys1,Steap2,Ankfy1,Vamp4,Rab14,Golga4,Gak,Stxbp6,Myo5a,Exoc2,Sptbn1,Blzf1,Ap1g1,Rabif,Sort1,Amn,Exoc1,Ap1ar,Tgoln2,Nsf,Rbsn,Vamp3,Rab29,Vti1a,Golph3,Dopey2,Nbea,Klhl20,Lamp1
GO:0019439	aromatic compound catabolic process	1.7739e-07	-15.5449	262	119	0.0187195	6357	20933	232791,230738,140483,17308,338359,24127,75686,15368,18983,11992,27756,14544,242202,66441,17161,381101,18605,192170,69694,353190,19826,53893,327762,50912,69241,71997,326622,75894,71169,50911,13368,433702,236511,110074,69639,78651,66362,50755,67464,18458,14085,22687,69902,214150,234594,16589,71701,76654,18950,15369,230753,66094,208718,70640,19819,13804,68276,52830,269378,103850,72662,72068,69125,23…	Cnot3,Zc3h12a,Hnmt,Mgat1,Supv3l1,Xrn1,Nudt16,Hmox1,Cnot7,Auh,Lsm2,Gda,Pde5a,Magohb,Maoa,Dnph1,Enpp1,Eif4a3,Tatdn1,Edc3,Rnps1,Nudt5,Dna2,Exosc10,Polr2d,Smg9,Upf2,Adal,Nbas,Exosc9,Dffb,Ncbp1,Ago1,Dut,Exosc8,Lsm6,Exosc3,Fbxo18,Entpd4,Pabpc1,Fah,Zpr1,Mrto4,Ago3,Cnot1,Uhmk1,Pnpt1,Upp2,Pnp,Hmox2,Thrap3,Lsm7,Dis3l2,Dcp2,Rnaseh1,Endog,Toe1,Pnrc2,Ahcy,Nt5m,Dis3,Cnot2,Cnot8,Nt5e,Gspt1,Exosc4,Prpf18,Lsm5,Bl…
GO:0051168	nuclear export	1.80093e-07	-15.5298	104	57	0.00896649	6357	20933	56488,64930,234733,433702,353258,20422,13680,195236,229512,69241,59015,103468,24015,97112,231042,14296,103573,15526,107939,227699,240354,445007,66118,54196,66231,73666,73192,59014,14105,69823,229709,72322,66244,223642,223527,57258,218210,107829,30959,68278,268420,18763,225160,18148,170762,75547,110750,56398,72149,65246,227720,103677,74204,56291,74412,56417,100042165	Nxt1,Tsc1,Ddx19b,Ncbp1,Ltv1,Shfm1,Ddx19a,Pom121l2,Smg5,Polr2d,Nup160,Nup107,Abce1,Nmd3,Nupl2,Frat1,Xpo1,Hspa9,Pom121,Nup188,Malt1,Nup85,Sarnp,Pabpn1,Thoc7,Thoc3,Xpot,Rrs1,Srsf10,Fyttd1,Ahcyl1,Xpo5,Nemf,Zc3h3,Eny2,Xpo4,Nup153,Thoc5,Ddx25,Ddx39,Alkbh5,Pkd1,Thoc1,Npm1,Nup155,Akap13,Cse1l,Chp1,Strada,Xpo7,Nup214,Smg6,Xpo6,Styx,Gle1,Adar,BC005561
GO:2001251	negative regulation of chromosome organization	1.97055e-07	-15.4398	52	34	0.00534843	6357	20933	2.25961e+176	Xrcc5,Apc,H3f3b,Rtel1,Klhl22,Nbn,Cep192,Terf1,Ttk,Hnrnpu,Bub1b,Mtbp,Tex14,Tnks2,Src,Terf2ip,Gnl3l,Hnrnpc,Tnks,Zw10,Psmg2,Mad1l1,Stil,H3f3a,Tinf2,Wapl,Nat10,Csnk2a2,Bub3,Mad2l1,Ercc4,Pinx1,Smg6,Bub1
GO:0071478	cellular response to radiation	2.05972e-07	-15.3955	131	68	0.0106969	6357	20933	19822,93759,77065,71175,60599,12955,21353,12753,270627,15574,26416,76867,13665,72440,19362,74041,234371,12018,22427,56349,15270,26447,22590,12925,109275,20147,69076,13197,80750,13603,20583,22061,106052,98415,68142,107986,12530,12914,328572,50754,12649,99982,68539,67738,22632,18538,20319,17380,18708,11852,60530,70238,50505,235323,17364,14375,15499,52033,56428,22596,14265,244694,13663,19355,16210,7…	Rnf4,Sirt1,Ints7,Nipbl,Trp53inp1,Cryab,Tank,Clock,Taf1,Hus1,Mapk14,Rhbdd1,Eif2s1,Rhno1,Rad51ap1,Ddias,Tmem161a,Bak1,Wrn,Net1,H2afx,Poli,Xpa,Crip1,Actr5,Rs1,Triap1,Gadd45a,N4bp1,Opn3,Snai2,Trp63,Fbxo4,Nucks1,Ino80,Ddb2,Cdc25a,Crebbp,Ep300,Fbxw7,Chek1,Kdm1a,Tmem109,Ppid,Yy1,Pcna,Sfrp2,Mme,Pik3r1,Rhob,Fignl1,Rnf168,Ercc4,Usp28,Trpm1,Xrcc6,Hsf1,Pbk,Mtch2,Xrcc5,Fmr1,Kdm4d,Ei24,Rad1,Impact,Usp47,Eif2ak…
GO:0016573	histone acetylation	2.23223e-07	-15.3151	95	53	0.00833727	6357	20933	70088,74195,100043497,102162,140858,59001,11785,28019,73390,67773,27878,73247,24075,217588,100683,17257,331623,64050,208146,20586,78783,73674,56505,94092,13486,225895,74763,20375,21761,107435,71777,12914,226976,12190,17928,328572,228714,17692,109115,75560,77853,15161,217031,75565,13831,18519,228019,56456,66979,270627,66233,269003,217127	Meaf6,Elp3,Nat8f7,Taf5l,Wdr5,Pole3,Apbb1,Ing4,Msl3l2,Kat8,Tada1,Mrgbp,Taf10,Mbip,Trrap,Mecp2,Bend3,Yeats4,Yeats2,Smarca4,Brpf1,Wdr75,Ruvbl1,Trim16,Dr1,Taf6l,Naa60,Spi1,Morf4l1,Hat1,Ing3,Crebbp,Kansl3,Brca2,Myog,Ep300,Csrp2bp,Msl3,Supt3,Ep400,Msl2,Hcfc1,Tada2a,Sgf29,Epc1,Kat2b,Mettl8,Actl6a,Pole4,Taf1,Dmap1,Sap130,Kat7
GO:1903311	regulation of mRNA metabolic process	2.51129e-07	-15.1973	134	69	0.0108542	6357	20933	230738,18983,108013,192170,213988,217351,19826,67039,14265,13992,71169,15499,433702,56758,28000,18789,60532,72486,18458,20637,12537,20815,234594,16589,231386,71701,67010,93686,21841,20924,14105,230753,236732,73473,52897,56215,225027,12455,69125,108014,66354,68927,664883,22722,102466836,22185,19704,17149,268697,15387,214498,381305,101214,66660,378430,235497,67996,18148,75420,12261,268859,110213,22…	Zc3h12a,Cnot7,Celf4,Eif4a3,Tnrc6b,Tnrc6c,Rnps1,Rbm25,Fmr1,Khdrbs3,Nbas,Hsf1,Ncbp1,Mbnl1,Prpf19,Papola,Wtap,Rnf219,Pabpc1,Snrnp70,Cdk11b,Srpk1,Cnot1,Uhmk1,Ythdc1,Pnpt1,Rbm7,Rbfox2,Tia1,Supt5,Srsf10,Thrap3,Rbm10,Iws1,Rbfox3,Acin1,Srsf7,Ccnt1,Cnot8,Srsf9,Snw1,Ptcd2,Nova1,Zfp64,Mir7578,U2af2,Upf1,Magoh,Ccnb1,Hnrnpk,Cdc73,Rc3h1,Tra2a,Sltm,Nanos2,Leo1,Srsf6,Npm1,Secisbp2,C1qbp,Rbfox1,Tmbim6,Ctr9,Srsf4,…
GO:0034976	response to endoplasmic reticulum stress	2.86996e-07	-15.0638	185	89	0.0140003	6357	20933	19246,50762,66597,20338,71853,56807,99011,223455,27103,19053,68944,26408,16476,53323,226641,67812,66155,108159,72607,66663,56812,23802,110616,72599,69065,72736,217069,100037258,208647,77128,17973,56491,27362,140499,56085,18708,66435,244373,50527,67490,50873,328572,11911,192193,67819,66795,67089,67878,64136,66967,19106,11783,66212,75212,12367,27368,226144,224045,320011,68366,76577,75841,52837,1734…	Ptpn1,Fbxo6,Trim13,Sel1l,Pdia6,Scamp5,Pomt1,March6,Eif2ak4,Ppp2cb,Tmco1,Map3k5,Jun,Ube2k,Atf6,Ubxn4,Ufc1,Ubxn8,Usp13,Uba5,Dnajb2,Amfr,Atxn3,Pdia5,Chac1,Tmx1,Trim25,Dnajc3,Creb3l2,Crebrf,Nck1,Vapb,Dnajb9,Ube2j2,Ubqln1,Pik3r1,Uggt2,Erlin2,Ero1l,Ufl1,Park2,Ep300,Atf4,Edem1,Derl1,Atg10,Psmc6,Tmem33,Sdf2l1,Edem3,Eif2ak2,Apaf1,Sec61b,Rnf121,Casp3,Tbl2,Erlin1,Eif2b5,Uggt1,Tmem129,Faf2,Rnf139,Tmx4,Bhlha1…
GO:0009411	response to UV	2.92351e-07	-15.0453	127	66	0.0103823	6357	20933	15574,319955,17688,74041,234371,76867,12954,13665,12018,22427,14775,22278,26447,22590,219158,71101,12359,56210,12367,12925,26419,12369,66131,16159,93759,22592,12190,60599,13649,71991,270627,235323,13872,52033,14265,13663,74996,15312,27103,16210,17685,80750,26407,14151,69076,109275,22061,328572,12530,107986,12914,68142,225028,99982,105787,12649,50754,69807,22632,18538,67738,18708,230484,17380,5050…	Hus1,Ercc6,Msh6,Ddias,Tmem161a,Rhbdd1,Cryaa,Eif2s1,Bak1,Wrn,Gpx1,Usf1,Poli,Xpa,Ccar2,Uvssa,Cat,Rev1,Casp3,Crip1,Mapk8,Casp7,Tipin,Il12a,Sirt1,Ercc5,Brca2,Trp53inp1,Egfr,Ercc8,Taf1,Usp28,Ercc3,Pbk,Fmr1,Ei24,Usp47,Hmgn1,Eif2ak4,Impact,Msh2,N4bp1,Map3k4,Fech,Triap1,Actr5,Trp63,Ep300,Cdc25a,Ddb2,Crebbp,Ino80,Map4k3,Kdm1a,Prkaa1,Chek1,Fbxw7,Trim32,Yy1,Pcna,Ppid,Pik3r1,Usp1,Mme,Ercc4,Rnf168
GO:0009119	ribonucleoside metabolic process	3.14249e-07	-14.9731	235	108	0.0169891	6357	20933	18537,15277,23971,12850,407785,13433,74167,12858,13807,11564,224794,74450,12869,28080,50799,269378,79455,80752,66152,11964,66725,211347,22273,20617,68833,26430,13435,23959,11637,11975,18102,56409,12862,67264,66052,433182,17434,14923,12183,14297,229709,18655,78038,67126,12861,12868,68550,66218,14751,230163,18746,11717,12064,67273,13382,110446,18648,73694,53893,72900,11977,11674,66945,11516,11566,7…	Pcmt1,Hk2,Papss1,Coq7,Ndufs6,Dnmt1,Nudt9,Cox5a,Eno2,Adsl,Enpp4,Pank2,Cox8b,Atp5o,Slc25a13,Ahcy,Pdcl2,Fam20c,Uqcr10,Atp6v1a,Lrrk2,Pank3,Uqcrc1,Snca,Pdcl3,Parg,Dnmt3a,Nt5e,Ak2,Atp6v0a1,Nme1,Nudt3,Cox6a2,Ndufb8,Sdhc,Eno1b,Mocs2,Guk1,Bpgm,Fxn,Ahcyl1,Pgk1,Mccc2,Atp5e,Cox6a1,Cox8a,Tefm,Ndufb9,Gpi1,Aldob,Pkm,Ampd3,Bdnf,Ndufa10,Dld,Acat1,Pgam1,Ndufaf7,Nudt5,Ndufv2,Atp7a,Aldoa,Sdha,Adcyap1,Adss,Adal,Mtch2…
GO:0051247	positive regulation of protein metabolic process	3.16281e-07	-14.9666	1404	511	0.0803838	6357	20933	13132,17295,215114,27059,14245,381921,68188,70729,192193,73086,67819,16589,13445,105193,13841,11538,14178,226407,93687,56398,99982,12053,100037258,214669,16410,66671,50501,268291,21929,11480,72949,11836,18795,98582,77128,17931,217378,14219,11789,214855,15499,15182,78600,67974,55982,433693,12161,212167,53380,70891,19696,17128,15258,12234,26904,243725,103583,12389,27103,215449,75388,269275,21808,33…	Dab2,Met,Hip1,Sh3d19,Lpin1,Taok2,Sympk,Nos1ap,Edem1,Rps6ka5,Derl1,Uhmk1,Cdk2ap1,Nhlrc1,Epha7,Adnp,Fgf7,Rab3gap1,Csnk1a1,Chp1,Kdm1a,Bcl6,Dnajc3,L3mbtl2,Itgav,Ccnh,Prok2,Rnf217,Tnfaip3,Acvr2a,Ccnt2,Araf,Plcb1,Khdc1b,Crebrf,Ppp1r12a,Dnajc27,Ctgf,Apc,Arid5a,Hsf1,Hdac2,Pde6h,Ccny,Paxip1,Akirin2,Bmp6,Gsap,Psmd10,Spdya,Rel,Smad4,Hipk2,Btrc,Sh2d1b1,Ppp1r9a,Fbxw11,Cav1,Eif2ak4,Rap1b,Boll,Acvr1c,Tgfb2,Dixd…
GO:0044711	single-organism biosynthetic process	3.25669e-07	-14.9374	864	330	0.0519113	6357	20933	51797,110911,28000,18634,67556,22247,217707,20512,105787,19015,14718,18618,20775,74185,12257,56075,225326,192185,53412,235339,19079,68055,14450,320438,14661,14916,238505,231070,66454,71883,74754,11674,55980,70325,110208,208449,319554,54391,75894,66154,11566,12660,50790,11910,14751,14148,67422,216820,353172,68736,328035,11717,56473,52014,106529,382985,329777,13350,76485,19299,225010,20963,14923,10…	Ctps,Cds2,Prpf19,Pex7,Pigm,Umps,Coq6,Slc1a3,Prkaa1,Ppard,Got1,Pemt,Sqle,Gbe1,Tspo,Pdss1,Pik3c3,Nadk,Ppp1r3c,Dlat,Prkab1,Atp5s,Gart,Alg6,Glud1,Guca2b,Mtr,Insig1,Nmnat1,Coq2,Dhcr24,Aldoa,Impa1,Pigw,Pgd,Sgms1,Idi1,Rfk,Adal,Tmem14c,Adss,Chka,Acsl4,Atf3,Gpi1,Fdx1,Dhdds,Dhrs7b,Gars,Tyw5,Fads6,Ampd3,Fads2,Nus1,Tecr,Rrm2b,Pigk,Dgat1,Glt8d1,Abcd3,Lclat1,Syk,Guk1,Haao,Aldh4a1,Atp5e,Asns,Trpc1,Adcy2,Lpcat4,…
GO:0031056	regulation of histone modification	3.61956e-07	-14.8317	135	69	0.0108542	6357	20933	24116,16392,214669,12649,99982,12053,328572,73086,20583,14245,217031,18193,54194,230674,22160,214899,17257,22339,20375,17128,24074,26992,69260,13018,104263,244694,14265,76804,55982,319974,214855,75302,80748,26914,74244,231151,53890,93765,98403,56399,17765,76246,71175,11793,67367,20926,13626,22083,58521,93759,18519,20587,22433,71458,109331,66317,73473,20617,16468,18760,52463,20874,74016,68943,6635…	Nelfa,Isl1,L3mbtl2,Chek1,Kdm1a,Bcl6,Ep300,Rps6ka5,Snai2,Lpin1,Tada2a,Nsd1,Akap8l,Kdm4a,Twist1,Kdm5a,Mecp2,Vegfa,Spi1,Smad4,Taf7,Brd7,Ing2,Ctcf,Kdm3a,Kdm4d,Fmr1,Kdm4c,Paxip1,Auts2,Arid5a,Asxl2,BC004004,H2afy,Atg7,Tada2b,Sart3,Ube2n,Zfp451,Akap8,Mtf2,Rtf1,Nipbl,Atg5,Paxbp1,Supt6,Eed,Ctr9,Eid1,Sirt1,Kat2b,Smarcb1,Xbp1,Bcor,Rnf20,Wdr61,Iws1,Snca,Jarid2,Prkd1,Tet1,Slk,Phf19,Pink1,Snw1,Gata2,Dnmt1,Ccnb…
GO:0009108	coenzyme biosynthetic process	3.64379e-07	-14.8251	89	50	0.00786535	6357	20933	110446,13382,74080,230027,217707,27402,68646,107885,19286,232087,235339,110391,18597,107766,192185,17768,268566,106564,70456,319945,216134,52064,17434,68263,56075,270076,108147,59027,60525,66454,67164,100705,67876,211347,14450,71365,66812,100039707,270685,55951,56690,109129,14287,74450,108156,66108,79464,71883,29807,12850	Acat1,Dld,Nmnat3,Coq3,Coq6,Pdhx,Nadk2,Mthfs,Pts,Mat2a,Dlat,Qdpr,Pdha1,Haao,Nadk,Mthfd2,Gphn,Ppcs,Mpc2,Flad1,Pdxk,Coq5,Mocs2,Pdhb,Pdss1,Gcdh,Atic,Nampt,Acss2,Nmnat1,Lipt2,Acacb,Coq10b,Pank3,Gart,Pdss2,Ppcdc,Mthfsl,Mthfd1l,Mpc1,Mlycd,Mmadhc,Fpgs,Pank2,Mthfd1,Ndufa9,Lias,Coq2,Tpk1,Coq7
GO:0042278	purine nucleoside metabolic process	3.93512e-07	-14.7482	220	102	0.0160453	6357	20933	18618,22272,11966,66416,21871,11949,18641,229363,75483,268566,106564,57295,18950,67003,67059,107569,56012,66454,72141,68197,18605,15357,11951,11958,11534,17685,66812,11946,107197,74114,12867,68055,17257,11516,75894,18293,56428,11566,72899,11674,11977,72900,66945,53893,73694,27369,67273,110446,13382,18648,11717,12064,230163,18746,68550,14751,66218,12861,67126,12868,12183,229709,18655,78038,14297,6…	Pemt,Uqcrq,Atp6v1b2,Ndufa7,Atp6v0a2,Atp5c1,Pfkl,Gmps,Cox8c,Gphn,Ppcs,Icmt,Pnp,Uqcrc2,Ola1,Nt5c3,Pgam2,Nmnat1,Adpgk,Ndufc2,Enpp1,Hmgcr,Atp5g1,Atp5k,Adk,Msh2,Ppcdc,Atp5a1,Uqcc3,Crot,Cox7c,Atp5s,Mecp2,Adcyap1,Adal,Ogdh,Mtch2,Adss,Macrod2,Aldoa,Atp7a,Ndufv2,Sdha,Nudt5,Ndufaf7,Dguok,Ndufa10,Acat1,Dld,Pgam1,Ampd3,Bdnf,Aldob,Pkm,Tefm,Gpi1,Ndufb9,Cox6a1,Atp5e,Cox8a,Bpgm,Ahcyl1,Pgk1,Mccc2,Fxn,Sdhc,Ndufb8,…
GO:0006475	internal protein amino acid acetylation	4.23992e-07	-14.6736	106	57	0.00896649	6357	20933	217127,269003,56292,66233,270627,66979,56456,228019,18519,13831,75565,217031,15161,77853,75560,109115,17692,328572,228714,12914,226976,12190,17928,71777,107435,21761,20375,74763,225895,18984,13486,94092,56505,73674,20586,78783,64050,208146,331623,17257,100683,217588,24075,27878,73247,67773,73390,28019,109900,17448,11785,59001,140858,102162,100043497,74195,70088	Kat7,Sap130,Naa10,Dmap1,Taf1,Pole4,Actl6a,Mettl8,Kat2b,Epc1,Sgf29,Tada2a,Hcfc1,Msl2,Ep400,Supt3,Msl3,Ep300,Csrp2bp,Crebbp,Kansl3,Brca2,Myog,Ing3,Hat1,Morf4l1,Spi1,Naa60,Taf6l,Por,Dr1,Trim16,Ruvbl1,Wdr75,Smarca4,Brpf1,Yeats4,Yeats2,Bend3,Mecp2,Trrap,Mbip,Taf10,Tada1,Mrgbp,Kat8,Msl3l2,Ing4,Asl,Mdh2,Apbb1,Pole3,Wdr5,Taf5l,Nat8f7,Elp3,Meaf6
GO:0061061	muscle structure development	4.47248e-07	-14.6202	459	189	0.029731	6357	20933	223701,14775,57810,13346,20190,11695,15213,56504,66354,19317,50876,74376,107589,12023,26416,64930,14200,12292,14281,237611,66860,94245,14225,12955,17261,218772,434246,18021,74244,11364,22388,228019,69852,17300,237560,22433,21808,77579,11793,16795,320502,17928,17131,53318,11477,22339,103806,22437,12389,239719,56771,17128,243931,19055,380664,19883,20586,224640,17260,17257,68810,15182,68794,112405,5…	Mkl1,Gpx1,Cdon,Des,Ryr1,Alx4,Hey1,Srpk3,Snw1,Qk,Tmod2,Myo18b,Mylk,Barx2,Mapk14,Tsc1,Fhl2,Cacna1s,Fos,Stac3,Tanc1,Dtnbp1,Fkbp1a,Cryab,Mef2d,Rarb,Trim72,Nfatc3,Atg7,Acadm,Wdr1,Mettl8,Tcf23,Foxc1,Lrrc10,Xbp1,Tgfb2,Myh10,Atg5,Large1,Lmod3,Myog,Smad7,Pdlim3,Acvr1,Vegfa,Maml1,Xirp1,Cav1,Mkl2,Med20,Smad4,Tshz3,Ppp3ca,Lemd3,Rora,Smarca4,Lemd2,Mef2c,Mecp2,Nexn,Hdac2,Flnc,Egln1,Jph1,Hlf,Fam65b,Foxn2,Slc8a1…
GO:0010506	regulation of autophagy	4.53065e-07	-14.6072	210	98	0.0154161	6357	20933	17168,22433,67443,67006,107607,93759,228361,72238,108079,192656,64143,20821,20620,60599,11983,54170,74006,73158,74244,229722,21821,15251,98732,67773,18711,268656,74302,64930,56367,67154,223453,13853,22185,15277,21425,252972,68441,68943,235439,11975,319801,20617,75909,69754,74374,66725,22224,100504663,56505,20924,50873,20788,22642,29869,54673,12257,56208,226407,381038,225020,50754,19338,235180,105…	Nprl3,Xbp1,Map1lc3b,Cisd2,Nod1,Sirt1,Ambra1,Tbc1d5,Prkaa2,Ripk2,Ralb,Trim21,Plk2,Trp53inp1,Atpif1,Rragc,Dnm1l,Larp1,Atg7,5330417C22Rik,Ift88,Hif1a,Rab3gap2,Kat8,Pikfyve,Sptlc1,Mtmr3,Tsc1,Scoc,Mtdh,Dap,Epm2a,U2af2,Hk2,Tfeb,Tpcn1,Rraga,Pink1,Herc1,Atp6v0a1,Tigar,Snca,Vmp1,Fbxo7,Clec16a,Lrrk2,Usp10,Atg14,Ruvbl1,Supt5,Park2,Srebf2,Zbtb17,Ulk2,Sh3glb1,Tspo,Becn1,Rab3gap1,Parl,Fez2,Fbxw7,Rab33b,Fez1,Pr…
GO:0090305	nucleic acid phosphodiester bond hydrolysis	4.6203e-07	-14.5876	99	54	0.00849457	6357	20933	13368,98985,433702,13872,50911,234699,327762,319618,353190,71151,330554,97827,13804,18294,140546,22590,51786,52830,26909,68276,230738,68626,104444,231724,227522,212442,59014,24128,66161,30946,22592,66899,74320,114615,74097,67619,94230,66446,75901,78581,74737,228410,50755,18148,69163,66362,12181,59028,17454,69639,67276,50505,213895,76130	Dffb,Clp1,Ncbp1,Ercc3,Exosc9,Edc4,Dna2,Dcp1b,Edc3,Eri2,Fan1,Exd2,Endog,Ogg1,Eri3,Xpa,Cpsf2,Pnrc2,Exo1,Toe1,Zc3h12a,Elac2,Rexo2,Rad9b,Rpp38,Lactb2,Rrs1,Xrn2,Pop4,Abt1,Ercc5,Fip1l1,Wdr33,Elac1,Pop7,Nob1,Cpsf1,Exosc7,Dcp1a,Utp23,Pcf11,Cstf3,Fbxo18,Npm1,Mrpl44,Exosc3,Bop1,Rcl1,Mov10,Exosc8,Eri1,Ercc4,Bms1,Las1l
GO:0045786	negative regulation of cell cycle	4.88951e-07	-14.531	370	157	0.0246972	6357	20933	231724,21974,109019,74996,27103,94315,12580,225131,14453,14371,216810,19355,229776,28019,11785,26425,19290,105782,327762,235559,76464,100683,12162,50523,235323,11789,102423,227331,20112,21929,59036,13000,18763,12649,56150,107047,22061,16589,72391,70385,69034,102060,381921,76454,225845,12367,17451,83560,19356,70799,13383,15270,105835,56190,224023,12450,71943,208836,12905,74041,26416,12228,71702,17…	Rad9b,Top2b,Nabp1,Usp47,Eif2ak4,Prcc,Cdkn2c,Wac,Gas2,Fzd9,Tom1l2,Rad1,Cdc14a,Ing4,Apbb1,Nubp1,Pura,Scrib,Dna2,Topbp1,Knl1,Trrap,Bmp7,Lats2,Usp28,Apc,Hinfp,Gigyf2,Rps6ka2,Tnfaip3,Dact1,Csnk2a2,Pkd1,Chek1,Mad2l1,Psmg2,Trp63,Uhmk1,Cdkn3,Spdl1,Nupr1l,Gadd45gip1,Taok2,Fbxo31,Pla2g16,Casp3,Mos,Tex14,Rad17,Cep192,Dlg1,H2afx,Sgsm3,Rbm38,Klhl22,Ccng1,Tom1l1,Fanci,Cradd,Ddias,Mapk14,Btg3,Cdc5l,Mdm4,Smad3,H…
GO:0006979	response to oxidative stress	5.35776e-07	-14.4396	299	131	0.0206072	6357	20933	15369,12460,12359,228026,20655,22590,20779,18760,69568,19017,26395,319955,109815,15251,240442,11863,23992,71991,14088,66653,382985,15926,74018,30931,93759,26419,14297,13070,56458,230738,16210,66414,71238,12928,238505,14629,66841,79464,225887,52521,14780,14056,18779,213272,19173,19053,14388,12350,108737,13852,19164,11852,105787,20656,69675,56642,110265,71701,18477,11938,13078,67067,66725,12367,206…	Hmox2,Ccs,Cat,Pdk1,Sod1,Xpa,Src,Prkd1,Vkorc1l1,Ppargc1a,Map2k1,Ercc6,Selenos,Hif1a,Adnp2,Arnt,Prkra,Ercc8,Fancc,Brf2,Rrm2b,Idh1,Als2,Tor1a,Sirt1,Mapk8,Fxn,Cyp11a1,Foxo1,Zc3h12a,Impact,Ndufa12,Sdhaf3,Crk,Mtr,Gclc,Etfdh,Lias,Ndufs8,Zfp622,Gpx5,Ezh2,Pla2r1,Txndc2,Psmb5,Ppp2cb,Gab1,Car3,Oxsr1,Stx2,Psen1,Rhob,Prkaa1,Sod2,Pxdn,Ankrd2,Msra,Pnpt1,Prdx1,Atp2a2,Cyp1b1,Romo1,Lrrk2,Casp3,Snca,Gpx1,Wrn,Cd36,M…
GO:1903827	regulation of cellular protein localization	5.50357e-07	-14.4127	554	222	0.0349221	6357	20933	17246,14360,216274,89867,13663,269473,140483,230738,269109,14369,211323,99237,66578,12390,319757,20660,14682,142980,77574,21809,12177,18618,218914,50754,12488,78688,70238,13607,56456,18708,11735,83814,54673,56722,18759,12985,269113,50873,18477,230514,22687,19335,21454,328572,108686,13830,106052,28042,12461,23892,57296,21749,103573,22418,16973,14634,320482,55943,21812,20779,226849,18760,333433,567…	Mdm2,Fyn,Cep290,Sec16b,Ei24,Lrig2,Hnmt,Zc3h12a,Dpp10,Fzd7,Nrg1,Tm9sf4,Mis18a,Cav2,Smo,Sorl1,Gnaq,Tlr3,Tcaf1,Tgfb3,Bnip3l,Pemt,Wapl,Fbxw7,Cd2ap,Nol3,Rnf168,Eda,Actl6a,Pik3r1,Ank3,Nedd4l,Sh3glb1,Litaf,Prkci,Csf3,Nup54,Park2,Prdx1,Leprot,Zpr1,Rab23,Tcp1,Ep300,Ccdc88a,Stom,Fbxo4,Selenoi,Cct2,Grem1,Psmd8,Terf1,Xpo1,Wnt5a,Lrp5,Gli3,Nron,Stx8,Tgfbr1,Src,Ppp2r5a,Prkd1,Gpd1l,Cript,Npepps,Stx7,Sri,Hectd1,V…
GO:0032270	positive regulation of cellular protein metabolic process	5.56083e-07	-14.4023	1310	478	0.0751927	6357	20933	329679,11863,67299,29815,53890,65973,16337,21987,67046,11797,218294,14063,21353,18148,17765,192656,17846,74018,269582,67031,67367,93759,109910,216965,20963,56295,338372,16412,18519,12166,66317,213541,72181,16591,20655,109700,21812,20779,22788,18712,59032,23892,20874,52463,11783,12175,22418,14186,12558,17311,56515,18011,13666,26395,72345,223453,22359,17240,108058,382030,16195,26382,17973,13690,562…	Fnip2,Arnt,Dock7,Bcar3,Sart3,Asph,Insr,Tpd52l1,Tbc1d7,Birc2,Cdc14b,F2rl1,Tank,Npm1,Mtf2,Ripk2,Commd1,Als2,Clspn,Upf3a,Paxbp1,Sirt1,Zfp91,Taok1,Syk,Higd1a,Map3k9,Itgb1,Kat2b,Bmpr1a,Wdr61,Ythdf2,Nsun4,Kl,Sod1,Itga1,Tgfbr1,Src,Zp3,Pim1,Ppp2r3c,Grem1,Slk,Tet1,Apaf1,Bnip2,Wnt5a,Fgfr4,Cdh2,Kitl,Rnf138,Neurl1a,Eif2ak3,Map2k1,Amer1,Dap,Vldlr,Mdfi,Camk2d,Cnep1r1,Il6st,Fgd2,Nck1,Eif4g2,Stk3,Ackr3,Pdcd2,Hax…
GO:0007033	vacuole organization	5.89047e-07	-14.3448	119	62	0.00975303	6357	20933	75964,77573,100502841,21425,68365,70381,72175,329015,100226,56453,66725,11432,51897,15212,100504663,66700,66048,11303,72739,78287,21982,14466,242557,71900,56208,18704,11793,19335,14387,225326,54525,14339,74781,66840,76959,67727,17158,15211,54636,67443,74438,244962,103199,19063,56085,73683,77040,17101,74244,229722,19164,67526,66734,74349,67841,12421,269338,235040,60599,20615,214585,26889	Trappc8,Vps33a,Epg5,Tfeb,Rab14,Tecpr1,Mfsd8,Atg2a,Stx12,Mbtps1,Lrrk2,Acp2,Atg13,Hexb,Atg14,Chmp3,Emc6,Abca1,Zkscan3,Rbsn,Tmem165,Gba,Atg4c,Tmem106b,Becn1,Pik3c2a,Atg5,Rab23,Gaa,Pik3c3,Syt7,Aktip,Wipi2,Wdr45b,Chmp5,Stx17,Man2a1,Hexa,Wdr45,Map1lc3b,Clvs1,Snx14,Fig4,Ppt1,Ubqln1,Atg16l2,Atg16l1,Lyst,Atg7,5330417C22Rik,Psen1,Atg12,Map1lc3a,Fam160a2,Atg3,Rb1cc1,Vps39,Atg4d,Trp53inp1,Snapin,Spg11,Cln8
GO:0018394	peptidyl-lysine acetylation	5.97309e-07	-14.3308	102	55	0.00865188	6357	20933	56456,66979,228019,270627,66233,217127,269003,71777,107435,21761,93759,17692,328572,228714,12190,226976,17928,12914,217031,75565,15161,75560,77853,109115,18519,13831,331623,17257,56505,73674,20586,78783,64050,208146,20375,225895,18984,74763,94092,13486,100043497,102162,74195,70088,28019,140858,59001,11785,24075,73247,27878,67773,73390,100683,217588	Actl6a,Pole4,Mettl8,Taf1,Dmap1,Kat7,Sap130,Ing3,Hat1,Morf4l1,Sirt1,Msl3,Ep300,Csrp2bp,Brca2,Kansl3,Myog,Crebbp,Tada2a,Sgf29,Hcfc1,Ep400,Msl2,Supt3,Kat2b,Epc1,Bend3,Mecp2,Ruvbl1,Wdr75,Smarca4,Brpf1,Yeats4,Yeats2,Spi1,Taf6l,Por,Naa60,Trim16,Dr1,Nat8f7,Taf5l,Elp3,Meaf6,Ing4,Wdr5,Pole3,Apbb1,Taf10,Mrgbp,Tada1,Kat8,Msl3l2,Trrap,Mbip
GO:0032434	regulation of proteasomal ubiquitin-dependent protein catabolic process	6.4008e-07	-14.2617	107	57	0.00896649	6357	20933	12398,223870,22218,106042,13132,80750,26374,67490,72330,22225,50873,217410,19358,71999,17846,218215,52551,17131,268291,30945,56812,23806,20620,231600,93687,19359,59025,71492,74244,19164,270627,70620,11836,14694,56085,56736,20588,52033,66245,170930,67664,53380,53323,56515,14466,17246,70797,14629,211770,74374,53312,66725,170823,100494,225131,219158,14673	Cbfa2t3,Senp1,Sumo1,Prickle1,Dab2,N4bp1,Rfwd2,Ufl1,Klhl40,Usp5,Park2,Trib2,Rad23a,Fbxo22,Commd1,Rnf144b,Sgta,Smad7,Rnf217,Rnf19a,Dnajb2,Arih1,Plk2,Chfr,Csnk1a1,Rad23b,Usp14,Bbs7,Atg7,Psen1,Taf1,Ube2v2,Araf,Rack1,Ubqln1,Rnf14,Smarcc1,Pbk,Hspbp1,Sumo2,Rnf125,Psmd10,Ube2k,Rnf138,Gba,Mdm2,Ankib1,Gclc,Trib1,Clec16a,Nub1,Lrrk2,Glmn,Zfand2a,Wac,Ccar2,Gna12
GO:0000725	recombinational repair	6.74899e-07	-14.2087	74	43	0.0067642	6357	20933	15270,330554,67241,68240,72749,233826,66634,12545,97827,191578,109019,226026,69596,20422,15574,71514,212377,27354,114714,19362,71567,56515,244694,22632,52864,93765,19891,50505,109145,66962,59029,231855,12190,19363,211978,67788,75178,68142,21761,98415,57434,225182,384619	H2afx,Fan1,Smc6,Rpa3,Tonsl,Palb2,Mcm8,Cdc7,Exd2,Helq,Nabp1,Smc5,Ap5s1,Shfm1,Hus1,Sfpq,Mms22l,Nbn,Rad51c,Rad51ap1,Mcm9,Rnf138,Kdm4d,Yy1,Slx4,Ube2n,Rpa2,Ercc4,Gins4,Swsap1,Psmd14,Ap5z1,Brca2,Rad51b,Zfyve26,Sfr1,Meiob,Ino80,Morf4l1,Nucks1,Xrcc2,Rbbp8,Ccdc155
GO:0000724	double-strand break repair via homologous recombination	6.74899e-07	-14.2087	74	43	0.0067642	6357	20933	98415,57434,225182,21761,384619,211978,12190,19363,231855,75178,68142,67788,59029,66962,50505,109145,19891,22632,52864,93765,71567,19362,114714,244694,56515,27354,212377,20422,15574,71514,226026,69596,97827,109019,191578,12545,66634,67241,233826,68240,72749,15270,330554	Nucks1,Xrcc2,Rbbp8,Morf4l1,Ccdc155,Zfyve26,Brca2,Rad51b,Ap5z1,Meiob,Ino80,Sfr1,Psmd14,Swsap1,Ercc4,Gins4,Rpa2,Yy1,Slx4,Ube2n,Mcm9,Rad51ap1,Rad51c,Kdm4d,Rnf138,Nbn,Mms22l,Shfm1,Hus1,Sfpq,Smc5,Ap5s1,Exd2,Nabp1,Helq,Cdc7,Mcm8,Smc6,Palb2,Rpa3,Tonsl,H2afx,Fan1
GO:0018393	internal peptidyl-lysine acetylation	7.08803e-07	-14.1597	100	54	0.00849457	6357	20933	270627,228019,56456,66979,269003,217127,66233,228714,328572,12190,17928,226976,12914,17692,21761,71777,107435,18519,13831,75560,77853,109115,217031,75565,15161,78783,20586,64050,208146,73674,56505,17257,331623,18984,74763,225895,94092,13486,20375,11785,59001,140858,28019,74195,70088,100043497,102162,217588,100683,73390,67773,24075,27878,73247	Taf1,Mettl8,Actl6a,Pole4,Sap130,Kat7,Dmap1,Csrp2bp,Ep300,Brca2,Myog,Kansl3,Crebbp,Msl3,Morf4l1,Ing3,Hat1,Kat2b,Epc1,Ep400,Msl2,Supt3,Tada2a,Sgf29,Hcfc1,Brpf1,Smarca4,Yeats4,Yeats2,Wdr75,Ruvbl1,Mecp2,Bend3,Por,Naa60,Taf6l,Trim16,Dr1,Spi1,Apbb1,Pole3,Wdr5,Ing4,Elp3,Meaf6,Nat8f7,Taf5l,Mbip,Trrap,Msl3l2,Kat8,Taf10,Tada1,Mrgbp
GO:0061136	regulation of proteasomal protein catabolic process	7.35132e-07	-14.1232	137	69	0.0108542	6357	20933	93687,19359,59025,50754,18763,268291,23806,56812,14694,56085,11836,71492,19164,67490,106042,80750,13132,26374,72330,59029,22225,50873,22218,228769,217410,71999,19358,70797,12234,14629,52892,14466,17246,100494,225131,56207,211770,53312,66245,170930,20588,52033,53380,53323,14265,94190,67664,231600,30945,20620,70620,270627,74244,22433,223870,12398,218215,52551,17131,17846,14775,219158,14673,74374,66…	Csnk1a1,Rad23b,Usp14,Fbxw7,Pkd1,Rnf217,Arih1,Dnajb2,Rack1,Ubqln1,Araf,Bbs7,Psen1,Ufl1,Prickle1,N4bp1,Dab2,Rfwd2,Klhl40,Psmd14,Usp5,Park2,Sumo1,Psmf1,Trib2,Fbxo22,Rad23a,Ankib1,Btrc,Gclc,Sco1,Gba,Mdm2,Zfand2a,Wac,Uchl5,Trib1,Nub1,Hspbp1,Sumo2,Smarcc1,Pbk,Psmd10,Ube2k,Fmr1,Ophn1,Rnf125,Chfr,Rnf19a,Plk2,Ube2v2,Taf1,Atg7,Xbp1,Senp1,Cbfa2t3,Rnf144b,Sgta,Smad7,Commd1,Gpx1,Ccar2,Gna12,Clec16a,Lrrk2,Glmn…
GO:0031647	regulation of protein stability	7.93086e-07	-14.0473	220	101	0.015888	6357	20933	59036,56274,218203,18708,20913,72400,11787,56398,226407,50754,18099,72607,15185,56426,12464,67819,106052,21454,12466,328572,57437,29810,215114,50873,16653,22404,217031,67702,20910,54673,22218,70925,227753,54644,16783,231130,67955,12912,12234,103583,17246,11785,19090,664994,66632,109676,18628,14682,235323,20437,319757,19302,233824,69237,67072,65973,21376,270627,17127,66169,231600,76568,20821,18148…	Dact1,Stk3,Mylip,Pik3r1,Stxbp4,Pinx1,Apbb2,Chp1,Rab3gap1,Fbxw7,Nlk,Usp13,Hdac6,Pdcd10,Cct4,Derl1,Fbxo4,Tcp1,Cct6a,Ep300,Golga7,Bag3,Hip1,Park2,Kras,Wiz,Tada2a,Rnf149,Stxbp1,Sh3glb1,Sumo1,Cdkn2aip,Gsn,Otud5,Lamp1,Tnip2,Sugt1,Creb1,Btrc,Fbxw11,Mdm2,Apbb1,Prkdc,Isoc2a,Dph6,Ank2,Per3,Gnaq,Usp28,Siah1a,Smo,Pex2,Cog7,Gtpbp4,Cdc37l1,Asph,Tbrg1,Taf1,Smad3,Tomm7,Chfr,Ift46,Trim21,Npm1,Atp1b3,Crebl2,Sirt1,…
GO:0031058	positive regulation of histone modification	8.05191e-07	-14.0322	86	48	0.00755073	6357	20933	22083,93759,73086,67367,13626,328572,109331,217031,22433,14245,20587,18519,20583,53890,231151,24116,71175,12053,99982,214669,17765,76246,16392,56399,93765,268697,14265,13433,26992,69260,319974,214855,75302,80748,18125,55982,16468,18760,17257,54194,66317,17128,66354,68943,74016,20874,22339,52463	Ctr9,Sirt1,Rps6ka5,Paxbp1,Eed,Ep300,Rnf20,Tada2a,Xbp1,Lpin1,Smarcb1,Kat2b,Snai2,Sart3,Tada2b,Nelfa,Nipbl,Bcl6,Kdm1a,L3mbtl2,Mtf2,Rtf1,Isl1,Akap8,Ube2n,Ccnb1,Fmr1,Dnmt1,Brd7,Ing2,Auts2,Arid5a,Asxl2,BC004004,Nos1,Paxip1,Jarid2,Prkd1,Mecp2,Akap8l,Wdr61,Smad4,Snw1,Pink1,Phf19,Slk,Vegfa,Tet1
GO:1903320	regulation of protein modification by small protein conjugation or removal	8.38326e-07	-13.9919	207	96	0.0151015	6357	20933	72400,19164,56085,107995,21929,56812,79263,67245,66647,50754,56150,99982,56398,217410,105193,71999,106052,67819,12257,93836,208727,72330,50873,80750,67490,106042,12042,16396,12952,216080,230738,211770,327799,12389,14360,67121,14629,53380,217379,414872,55982,14083,170930,64685,66245,30877,11863,74244,100737,270627,53890,69237,14225,218294,11797,231872,76863,93765,67046,21353,108705,18148,80280,208…	Pinx1,Psen1,Ubqln1,Cdc20,Tnfaip3,Dnajb2,Trim39,Peli1,Ndnl2,Fbxw7,Mad2l1,Kdm1a,Chp1,Trib2,Nhlrc1,Fbxo22,Fbxo4,Derl1,Tspo,Rnf111,Hdac4,Klhl40,Park2,N4bp1,Ufl1,Prickle1,Bcl10,Itch,Cry1,Ube2d1,Zc3h12a,Trib1,Usp44,Cav1,Fyn,Mastl,Gclc,Psmd10,Ubxn2a,Zyg11b,Paxip1,Ptk2,Sumo2,Nmi,Hspbp1,Gnl3,Arnt,Atg7,Dcun1d4,Taf1,Sart3,Gtpbp4,Fkbp1a,Cdc14b,Birc2,Aimp2,Dcun1d5,Ube2n,Tbc1d7,Tank,Pttg1ip,Npm1,Cdk5rap3,Trim2…
GO:0007093	mitotic cell cycle checkpoint	9.04454e-07	-13.9159	103	55	0.00865188	6357	20933	11789,15574,100683,229543,235559,208836,12905,56190,27354,19090,19290,12450,234664,224023,105837,12236,234736,17246,21749,22137,70799,68193,109019,19356,52696,94315,231724,83560,21974,17685,12366,76454,77011,66131,105377,22061,20460,17120,107047,67941,269582,26951,12649,19891,80280,56150,231600,12237,20620,13000,227331,68067,17535,11909,12235	Apc,Hus1,Trrap,Ints3,Topbp1,Fanci,Cradd,Rbm38,Nbn,Prkdc,Pura,Ccng1,Nae1,Klhl22,Mtbp,Bub1b,Rfwd3,Mdm2,Terf1,Ttk,Cep192,Rpl24,Nabp1,Rad17,Zwint,Prcc,Rad9b,Tex14,Top2b,Msh2,Casp2,Fbxo31,Ticrr,Tipin,Slf1,Trp63,Stil,Mad1l1,Psmg2,Rps27l,Clspn,Zw10,Chek1,Rpa2,Cdk5rap3,Mad2l1,Chfr,Bub3,Plk2,Csnk2a2,Gigyf2,Mrnip,Mre11a,Atf2,Bub1
GO:1903050	regulation of proteolysis involved in cellular protein catabolic process	9.33298e-07	-13.8845	158	77	0.0121126	6357	20933	70620,270627,74244,231600,20620,11983,30945,218215,52551,22215,17131,17846,22433,223870,12398,219158,14673,74374,68833,170823,66725,13645,244667,14775,56515,19192,75841,56736,11836,56085,14694,19164,71492,93687,50754,19359,59025,18763,79263,268291,23806,56812,228769,19358,71999,217410,26374,80750,67490,13132,106042,50873,59029,22225,72330,22218,100494,225131,56207,211770,53312,12234,70797,14629,5…	Ube2v2,Taf1,Atg7,Chfr,Plk2,Atpif1,Rnf19a,Rnf144b,Sgta,Ube3a,Smad7,Commd1,Xbp1,Senp1,Cbfa2t3,Ccar2,Gna12,Clec16a,Pdcl3,Glmn,Lrrk2,Egf,Disc1,Gpx1,Rnf138,Psme3,Rnf139,Rnf14,Araf,Ubqln1,Rack1,Psen1,Bbs7,Csnk1a1,Fbxw7,Rad23b,Usp14,Pkd1,Trim39,Rnf217,Arih1,Dnajb2,Psmf1,Rad23a,Fbxo22,Trib2,Rfwd2,N4bp1,Ufl1,Dab2,Prickle1,Park2,Psmd14,Usp5,Klhl40,Sumo1,Zfand2a,Wac,Uchl5,Trib1,Nub1,Btrc,Ankib1,Gclc,Sco1,Gb…
GO:0060341	regulation of cellular localization	9.43383e-07	-13.8738	843	320	0.0503382	6357	20933	66632,14084,22234,16568,55988,14873,227753,329693,18294,15368,66700,24088,19055,13175,104831,545156,19246,22339,12464,72322,19684,18767,14362,70456,20788,22642,27967,20583,59036,72017,14694,140499,22350,72400,18198,381038,18763,20319,69581,97112,68010,23988,12638,50907,14169,15387,207728,109905,26416,56453,19042,51897,66725,56330,13645,68943,19062,109272,57340,13640,18645,232748,53886,223527,1179…	Dph6,Faf1,Ugcg,Kif3a,Snx12,Gsto1,Gsn,Fcrl5,Ogg1,Hmox1,Chmp3,Tlr2,Ppp3ca,Dclk1,Ptpn23,Kalrn,Ptpn1,Vegfa,Cct4,Xpo5,Rdx,Pkia,Fzd1,Mpc2,Srebf2,Zbtb17,Cherp,Snai2,Dact1,Cyb5r1,Rack1,Ube2j2,Ezr,Pinx1,Musk,Parl,Pkd1,Sfrp2,Rhou,Nmd3,Bambi,Pin1,Cftr,Preb,Fgf14,Hnrnpk,Pde2a,Rap1a,Mapk14,Mbtps1,Ppm1a,Atg13,Lrrk2,Pdcd5,Egf,Pink1,Inpp5k,Mybpc1,Jph3,Efna5,Pfn2,Tcaf2,Cdkl2,Eny2,Atg5,Rbm22,Os9,Nf2,Reep1,Cacna1e,…
GO:0010508	positive regulation of autophagy	9.48992e-07	-13.8679	84	47	0.00739342	6357	20933	268656,64930,56367,18475,13853,67154,15277,21425,252972,17281,78610,68943,66597,14466,225131,15368,27103,74374,69754,56458,230738,24088,66725,100504663,20924,22433,54673,93759,228361,107607,56208,72238,108079,64143,192656,226407,20821,105787,11983,20620,60599,12177,73158,229722,74244,98732,15251	Sptlc1,Tsc1,Scoc,Pafah1b2,Epm2a,Mtdh,Hk2,Tfeb,Tpcn1,Fyco1,Uvrag,Pink1,Trim13,Gba,Wac,Hmox1,Eif2ak4,Clec16a,Fbxo7,Foxo1,Zc3h12a,Tlr2,Lrrk2,Atg14,Supt5,Xbp1,Sh3glb1,Sirt1,Ambra1,Nod1,Becn1,Tbc1d5,Prkaa2,Ralb,Ripk2,Rab3gap1,Trim21,Prkaa1,Atpif1,Plk2,Trp53inp1,Bnip3l,Larp1,5330417C22Rik,Atg7,Rab3gap2,Hif1a
GO:0071560	cellular response to transforming growth factor beta stimulus	9.56295e-07	-13.8602	108	57	0.00896649	6357	20933	13132,80707,21808,55994,12827,11482,16412,11477,17131,21814,12163,12394,14573,75901,17700,17126,108075,18099,230597,12167,21809,22284,17127,268977,14083,66513,68010,53618,11502,74117,17684,13433,14479,16476,19017,14281,17128,15258,11783,12562,21813,226352,12389,14360,12843,20679,14538,12928,20779,17260,21812,16963,19042,56330,12912,26409,269275	Dab2,Wwox,Tgfb2,Smad9,Col4a2,Acvrl1,Itgb1,Acvr1,Smad7,Tgfbr3,Bmp8a,Runx1,Gdnf,Dcp1a,Mstn,Smad2,Ltbp4,Nlk,Zfyve9,Bmpr1b,Tgfb3,Usp9x,Smad3,Ltbp1,Ptk2,Tab1,Bambi,Fut8,Adam9,Actr3,Cited2,Dnmt1,Usp15,Jun,Ppargc1a,Fos,Smad4,Hipk2,Apaf1,Cdh5,Tgfbr2,Epb41l5,Cav1,Fyn,Col1a2,Sox6,Gcnt2,Crk,Src,Mef2c,Tgfbr1,Xcl1,Ppm1a,Pdcd5,Creb1,Map3k7,Acvr1c
GO:0006732	coenzyme metabolic process	1.01949e-06	-13.7962	245	110	0.0173038	6357	20933	13433,13807,17448,29807,12850,15277,18537,333433,216188,171282,19895,74450,211347,71365,192166,100039707,270685,269378,21351,67420,66885,67164,26897,433182,68263,17434,66646,216134,22171,20917,59027,60525,17449,17768,232087,107766,18597,319945,229709,18655,78038,12183,20916,107885,18746,230163,14751,14732,14148,19286,18648,13382,13350,110446,15929,14149,52538,79464,16832,14555,102247,66108,11674,…	Dnmt1,Eno2,Mdh2,Tpk1,Coq7,Hk2,Pcmt1,Gpd1l,Aldh1l2,Acot4,Rpia,Pank2,Pank3,Pdss2,Sardh,Mthfsl,Mthfd1l,Ahcy,Taldo1,Far1,Acadsb,Lipt2,Acot1,Eno1b,Pdhb,Mocs2,Rpe,Pdxk,Tyms,Suclg2,Nampt,Acss2,Mdh1,Mthfd2,Mat2a,Haao,Pdha1,Flad1,Ahcyl1,Pgk1,Mccc2,Bpgm,Sucla2,Mthfs,Pkm,Aldob,Gpi1,Gpam,Fdx1,Pts,Pgam1,Dld,Dgat1,Acat1,Idh3g,Fdxr,Acaa2,Lias,Ldhb,Gpd1,Gpat4,Ndufa9,Aldoa,Shpk,Coq2,H6pd,Ogdh,Mpc1,Mlycd,Mthfd1,Mm…
GO:1903322	positive regulation of protein modification by small protein conjugation or removal	1.04194e-06	-13.7744	123	63	0.00991034	6357	20933	11796,208727,93836,109331,12042,106042,50873,105193,71999,17846,217410,22215,22083,66412,17131,67819,106052,21353,67245,108705,18148,67046,93765,56812,11797,218294,14225,231872,76863,99982,192656,54473,231600,50754,80280,66647,100737,30877,11863,107995,56085,53890,55982,72345,64685,66245,75841,170930,14083,14828,53380,208836,23988,65113,244667,12389,76273,67121,211770,230738,216080,66725,13645	Birc3,Hdac4,Rnf111,Rnf20,Bcl10,Prickle1,Park2,Nhlrc1,Fbxo22,Commd1,Trib2,Ube3a,Ctr9,Arrdc4,Smad7,Derl1,Fbxo4,Tank,Peli1,Pttg1ip,Npm1,Tbc1d7,Ube2n,Dnajb2,Birc2,Cdc14b,Fkbp1a,Aimp2,Dcun1d5,Kdm1a,Ripk2,Tollip,Chfr,Fbxw7,Cdk5rap3,Ndnl2,Dcun1d4,Gnl3,Arnt,Cdc20,Ubqln1,Sart3,Paxip1,Amer1,Nmi,Hspbp1,Rnf139,Sumo2,Ptk2,Hspa5,Psmd10,Fanci,Pin1,Ndfip1,Disc1,Cav1,Ndfip2,Mastl,Trib1,Zc3h12a,Ube2d1,Lrrk2,Egf
GO:0065009	regulation of molecular function	1.07211e-06	-13.7459	2168	756	0.118924	6357	20933	20655,219158,22788,16973,58799,22627,11783,14186,12461,18712,23892,226591,18011,13666,26395,13492,26382,22359,67154,17240,57915,108058,28036,69085,329659,108909,71912,67299,192656,66849,104303,12211,67459,11797,218294,21353,74256,109910,20963,56295,74018,66993,16412,66687,338367,20719,13380,17685,226352,12454,66597,230126,210789,22003,109294,13018,52521,382056,70296,74754,142980,68729,14056,11516…	Sod1,Ccar2,Zp3,Lrp5,Crbn,Ywhae,Apaf1,Fgfr4,Cct2,Pim1,Grem1,Tiprl,Neurl1a,Eif2ak3,Map2k1,Drd5,Fgd2,Vldlr,Mtdh,Mdfi,Tbc1d1,Camk2d,Larp7,Zcchc9,E130311K13Rik,Aida,Jsrp1,Dock7,Ripk2,Ppp1r2,Arl1,Birc6,Nvl,Birc2,Cdc14b,Tank,Cyld,Zfp91,Syk,Higd1a,Als2,Smarcd3,Itgb1,Tbc1d15,Myo1d,Serpinb6a,Dkk1,Msh2,Epb41l5,Ccnk,Trim13,Shb,Tbc1d4,Tpm1,Prex2,Ctcf,Zfp622,Crtc1,Tbc1d13,Dhcr24,Tlr3,Trim37,Ezh2,Adcyap1,Smyd3,…
GO:0046128	purine ribonucleoside metabolic process	1.11315e-06	-13.7083	216	99	0.0155734	6357	20933	12064,11717,18648,13382,110446,67273,14751,66218,68550,18746,230163,229709,78038,18655,14297,12183,12868,12861,67126,12862,56409,18102,14923,17434,433182,66052,67264,13435,26430,11637,11975,23959,66152,80752,269378,22273,20617,211347,11964,66725,74450,224794,11564,50799,28080,12869,23971,12850,15277,18537,13807,13433,74167,12858,407785,11966,22272,18618,18641,229363,11949,66416,21871,57295,18950,…	Bdnf,Ampd3,Pgam1,Dld,Acat1,Ndufa10,Gpi1,Ndufb9,Tefm,Pkm,Aldob,Ahcyl1,Mccc2,Pgk1,Fxn,Bpgm,Cox8a,Cox6a1,Atp5e,Cox6a2,Nudt3,Nme1,Guk1,Mocs2,Eno1b,Sdhc,Ndufb8,Dnmt3a,Parg,Ak2,Atp6v0a1,Nt5e,Uqcr10,Fam20c,Ahcy,Uqcrc1,Snca,Pank3,Atp6v1a,Lrrk2,Pank2,Enpp4,Adsl,Slc25a13,Atp5o,Cox8b,Papss1,Coq7,Hk2,Pcmt1,Eno2,Dnmt1,Nudt9,Cox5a,Ndufs6,Atp6v1b2,Uqcrq,Pemt,Pfkl,Gmps,Atp5c1,Ndufa7,Atp6v0a2,Icmt,Pnp,Uqcrc2,Ppcs…
GO:0007029	endoplasmic reticulum organization	1.11989e-06	-13.7023	46	30	0.00471921	6357	20933	7.11162e+155	Stx18,Tor1aip2,Reep1,Bnip1,Vapb,Atl2,Trdn,Lman2,Vmp1,Sec16b,Wrb,Rab18,Jagn1,Tmem33,Lman2l,Pex5,Eif2ak3,Lnpk,Gak,Tram2,Atl3,Arl6ip1,Cacna1s,Rab10,Tmem170,Rtn3,Tor1b,Sec61a1,Cav2,Rtn4
GO:1903362	regulation of cellular protein catabolic process	1.17051e-06	-13.6581	182	86	0.0135284	6357	20933	67664,94190,14265,53323,53380,52033,20588,170930,14083,66245,53312,211770,56207,100494,225131,17246,14466,14629,52892,12234,70797,19684,19358,71999,217410,228769,22218,50873,59029,22225,242960,72330,26374,106042,80750,13132,67490,19164,22350,71492,218203,14694,56085,11836,59036,21929,79263,23806,56812,268291,18763,50754,59025,19359,93687,19192,56515,72345,56736,75841,66725,170823,13645,74374,6883…	Rnf125,Ophn1,Fmr1,Ube2k,Psmd10,Pbk,Smarcc1,Sumo2,Ptk2,Hspbp1,Nub1,Trib1,Uchl5,Zfand2a,Wac,Mdm2,Gba,Gclc,Sco1,Btrc,Ankib1,Rdx,Rad23a,Fbxo22,Trib2,Psmf1,Sumo1,Park2,Psmd14,Usp5,Fbxl5,Klhl40,Rfwd2,Prickle1,N4bp1,Dab2,Ufl1,Psen1,Ezr,Bbs7,Mylip,Rack1,Ubqln1,Araf,Dact1,Tnfaip3,Trim39,Arih1,Dnajb2,Rnf217,Pkd1,Fbxw7,Usp14,Rad23b,Csnk1a1,Psme3,Rnf138,Amer1,Rnf14,Rnf139,Lrrk2,Glmn,Egf,Clec16a,Pdcl3,Gna12,C…
GO:0000122	negative regulation of transcription from RNA polymerase II promoter	1.1899e-06	-13.6416	739	284	0.0446752	6357	20933	15437,15257,24074,18628,230796,81004,385674,17257,107823,69585,214899,27274,77683,23938,20586,12952,19821,22339,16600,234594,22715,239099,433759,18767,20788,208727,13560,20583,319965,59036,54343,13614,22350,170765,207165,50708,18538,22632,16392,18933,66075,22661,56070,21834,15387,207728,69228,12023,17190,331623,66354,27049,74016,15213,17876,17131,19016,226830,15900,71458,235041,18028,217864,22337…	Hoxd8,Hipk1,Taf7,Per3,Wdtc1,Tbl1xr1,Zfp174,Mecp2,Whsc1,Hfe2,Kdm5a,Zfp354b,Ehmt1,Map2k5,Smarca4,Cry1,Rnf2,Vegfa,Klf4,Cnot1,Zfp57,Homez,Hdac1,Pkia,Srebf2,Hdac4,E4f1,Snai2,Cc2d1b,Dact1,Atf7ip,Edn1,Ezr,Ripply3,Bptf,Hist1h1c,Pcna,Yy1,Isl1,Prrx1,Chchd3,Zfp148,Tcerg1,Thrb,Hnrnpk,Pde2a,Zfp746,Barx2,Mbd1,Bend3,Snw1,Etv3,Phf19,Hey1,Myef2,Smad7,Pparg,Smyd2,Irf8,Bcor,Kank2,Nfib,Rcor1,Vdr,Zeb1,H2afy,Esr1,Rarb…
GO:0098813	nuclear chromosome segregation	1.30806e-06	-13.547	185	87	0.0136857	6357	20933	76464,54141,320209,16211,229776,69928,100710,109359,51792,12615,114714,22137,67139,66713,68549,77805,77053,54194,21974,101994,380664,224640,76959,67064,12617,26951,68142,70385,17120,72787,56208,218914,110033,228421,237911,56150,50754,30939,50878,50505,72400,14211,105988,67052,17535,107995,226026,224023,73804,108907,74117,268697,108000,21749,70218,104806,83560,208718,71819,52696,26934,52563,14841,…	Knl1,Spag5,Ddx11,Kpnb1,Cdc14a,Apitd1,Pds5b,Fam175b,Ppp2r1a,Cenpa,Rad51c,Ttk,Mis12,Actr2,Sgol2a,Esco1,Sun1,Akap8l,Top2b,Champ1,Lemd3,Lemd2,Chmp5,Chmp1b,Cenpc1,Zw10,Ino80,Spdl1,Mad1l1,Ndc1,Becn1,Wapl,Kif22,Kif18a,Brip1,Mad2l1,Fbxw7,Pttg1,Stag3,Ercc4,Pinx1,Smc2,Espl1,Ndc80,Mre11a,Cdc20,Smc5,Klhl22,Kif2c,Nusap1,Actr3,Ccnb1,Cenpf,Terf1,Kif18b,Fancm,Tex14,Dis3l2,Kif23,Zwint,Racgap1,Cdc23,Gsg2,Mlh1,Rrs1…
GO:0000226	microtubule cytoskeleton organization	1.3395e-06	-13.5232	378	158	0.0248545	6357	20933	108907,11765,268697,216848,338349,18472,13518,26934,70218,17451,72972,71819,72776,14158,60344,233276,13383,70799,244667,432611,56471,381293,384619,259279,21951,93742,63873,68339,381644,67771,108903,71206,14048,50850,17169,76568,67979,228730,12955,67378,18541,99100,235661,100088,16211,16551,229776,51792,11789,54141,16568,73738,219072,544696,13424,12389,213582,70385,74470,217325,68142,320244,70737,…	Nusap1,Ap1g1,Ccnb1,Chd3,Cntln,Pafah1b1,Dst,Racgap1,Kif18b,Mos,Ccser2,Kif23,Sass6,Fer,Fign,Tubgcp5,Dlg1,Cep192,Disc1,Dnaic2,Stmn4,Kif14,Ccdc155,Tubgcp3,Tnks,Pard3,Trpv4,Ccdc88c,Cep135,Arpc5,Tbcd,Katnal2,Eya1,Spast,Mark3,Ift46,Atad1,Kiz,Cryab,Bbs2,Pcnt,Cep152,Dync1li1,Rcc1,Kpnb1,Kif11,Cdc14a,Ppp2r1a,Apc,Spag5,Kif3a,Haus7,Haus4,Tbc1d32,Dync1h1,Cav1,Map9,Spdl1,Cep72,Llgl2,Ino80,Ttll5,Cgn,Fopnl,Cep68,…
GO:0031398	positive regulation of protein ubiquitination	1.35475e-06	-13.5119	104	55	0.00865188	6357	20933	11796,93836,106042,109331,12042,50873,217410,17846,105193,71999,22215,22083,106052,67819,17131,66412,67245,18148,108705,14225,218294,56812,11797,76863,231872,93765,67046,99982,231600,192656,66647,80280,50754,100737,107995,56085,55982,72345,66245,64685,14083,75841,14828,208836,23988,53380,65113,244667,12389,76273,67121,216080,211770,13645,66725	Birc3,Rnf111,Prickle1,Rnf20,Bcl10,Park2,Trib2,Commd1,Nhlrc1,Fbxo22,Ube3a,Ctr9,Fbxo4,Derl1,Smad7,Arrdc4,Peli1,Npm1,Pttg1ip,Fkbp1a,Cdc14b,Dnajb2,Birc2,Dcun1d5,Aimp2,Ube2n,Tbc1d7,Kdm1a,Chfr,Ripk2,Ndnl2,Cdk5rap3,Fbxw7,Dcun1d4,Cdc20,Ubqln1,Paxip1,Amer1,Hspbp1,Nmi,Ptk2,Rnf139,Hspa5,Fanci,Pin1,Psmd10,Ndfip1,Disc1,Cav1,Ndfip2,Mastl,Ube2d1,Trib1,Egf,Lrrk2
GO:0031396	regulation of protein ubiquitination	1.39218e-06	-13.4846	180	85	0.0133711	6357	20933	93836,12042,67490,106042,80750,50873,72330,105193,71999,217410,12257,67819,106052,67245,79263,56812,99982,56398,56150,50754,66647,19164,72400,21929,107995,56085,55982,414872,217379,64685,66245,14083,53380,14360,12389,14629,67121,211770,216080,12952,327799,11796,70097,16885,237107,109331,17846,11793,22083,22215,17131,66412,18148,108705,93765,67046,231872,76863,11797,218294,14225,231600,192656,8028…	Rnf111,Bcl10,Ufl1,Prickle1,N4bp1,Park2,Klhl40,Nhlrc1,Fbxo22,Trib2,Tspo,Derl1,Fbxo4,Peli1,Trim39,Dnajb2,Kdm1a,Chp1,Mad2l1,Fbxw7,Ndnl2,Psen1,Pinx1,Tnfaip3,Cdc20,Ubqln1,Paxip1,Zyg11b,Ubxn2a,Nmi,Hspbp1,Ptk2,Psmd10,Fyn,Cav1,Gclc,Mastl,Trib1,Ube2d1,Cry1,Usp44,Birc3,Sash1,Limk1,Gnl3l,Rnf20,Commd1,Atg5,Ctr9,Ube3a,Smad7,Arrdc4,Npm1,Pttg1ip,Ube2n,Tbc1d7,Aimp2,Dcun1d5,Birc2,Cdc14b,Fkbp1a,Chfr,Ripk2,Cdk5rap3…
GO:0000288	nuclear-transcribed mRNA catabolic process, deadenylation-dependent decay	1.53733e-06	-13.3855	36	25	0.00393267	6357	20933	1.04626e+132	Cnot6,Dcp2,Cnot3,Toe1,Exosc8,Cnot2,Cnot8,Cnot7,Exosc3,Auh,Dcp1a,Exosc7,Parn,Samd4b,Polr2d,Dcp1b,Lsm1,Cnot1,Exosc9,Dcps,Pan2,Noct,Rc3h1,Patl1,Mlh1
GO:0000184	nuclear-transcribed mRNA catabolic process, nonsense-mediated decay	1.56974e-06	-13.3646	32	23	0.00361806	6357	20933	2.29512e+122	Smg5,Casc3,Rnps1,Smg9,Upf2,Dcp1b,Uhmk1,Eif3e,Exosc10,Upf1,Magoh,Smg1,Smg8,Ncbp1,Dcp2,Smg6,Pnrc2,Magohb,Gspt1,Pabpc1,Eif4a3,Parn,Dcp1a
GO:0016482	cytosolic transport	1.6124e-06	-13.3378	102	54	0.00849457	6357	20933	53334,210148,73296,58244,104303,14020,70297,27681,270192,11769,74349,14105,54525,13858,14339,231834,16558,67804,107338,68299,72238,68505,69178,53612,228960,225326,53611,66713,78287,22319,226422,231876,211556,56440,22135,55943,16783,30930,226541,19720,216131,70028,100855,18711,68365,74718,66460,11736,56418,19346,20661,11765,271457,231580	Gosr1,Slc30a6,Rhobtb3,Stx6,Arl1,Evi5,Gcc2,Snf8,Rab6b,Ap1s1,Fam160a2,Srsf10,Syt7,Eps15,Aktip,Snx8,Kif16b,Snx2,Gbf1,Vps53,Tbc1d5,Vps51,Snx5,Vti1b,Stx16,Pik3c3,Vti1a,Actr2,Rbsn,Vamp3,Rab29,Lmtk2,Ap1ar,Snx1,Tgoln2,Stx8,Lamp1,Vps26a,Klhl20,Trim27,Trappc10,Dopey2,Tbc1d14,Pikfyve,Rab14,Snx16,Sys1,Ankfy1,Ykt6,Rab6a,Sort1,Ap1g1,Rab5a,Gak
GO:0033045	regulation of sister chromatid segregation	2.07981e-06	-13.0832	67	39	0.00613497	6357	20933	1.07047e+207	Psmg2,Tnks,Zw10,Becn1,Axin2,Stil,Mad1l1,Slf1,Fam178a,Espl1,H2afy,Bub1,Ndc80,Bub3,Csnk2a2,Wapl,Lcmt1,Rad21,Mad2l1,Cdc27,Klhl22,Ddx11,Dync1li1,Ccnb1,Smc5,Sfpq,Nek6,Apc,Tex14,Mos,Usp44,Cdc23,Ttk,Terf1,Anapc4,Cep192,Mtbp,Bub1b,Sgol2a
GO:0006468	protein phosphorylation	2.2193e-06	-13.0183	735	281	0.0442032	6357	20933	26407,22385,26406,13143,19079,29869,11482,22026,225326,20815,12537,60505,225028,30957,105787,18099,66878,319887,19878,56274,59125,12235,17346,59126,108960,242083,20187,142980,19090,192292,244895,12236,21813,14360,70425,18004,98267,12545,26419,12374,12166,20623,338372,16885,216965,635895,20963,75292,269582,192656,13728,16337,269224,17258,23992,329679,12447,17240,108058,18749,264064,26395,13666,117…	Map3k4,Baz1b,Map3k3,Dapk2,Prkab1,Ulk2,Acvrl1,Nr2c2,Pik3c3,Srpk1,Cdk11b,Il21,Map4k3,Mapk8ip3,Prkaa1,Nlk,Riok3,E030030I06Rik,Rock2,Stk3,Nek7,Bub1,Mknk1,Nek6,Irak2,Ppm1l,Ryk,Tlr3,Prkdc,Nrbp1,Peak1,Bub1b,Tgfbr2,Fyn,Csnk1g3,Nek1,Stk17b,Cdc7,Mapk8,Casr,Bmpr1a,Snrk,Map3k9,Limk1,Taok1,Gm7168,Syk,Prkd3,Clspn,Ripk2,Mark2,Insr,Pask,Mef2a,Prkra,Fnip2,Ccne1,Mdfi,Camk2d,Prkacb,Cdk8,Map2k1,Eif2ak3,Speg,Gak,Eef2…
GO:0010639	negative regulation of organelle organization	2.22174e-06	-13.0172	270	118	0.0185622	6357	20933	378430,235041,103677,74244,13982,98956,67046,12237,18148,74143,18645,28113,75593,56363,17755,56295,74201,21951,12343,108903,233977,18613,78798,17245,15381,14297,237107,319801,74493,20779,208177,66725,20617,74374,50876,83560,65970,17451,68943,105837,68041,63985,14775,70799,19062,21749,71943,27354,19017,269400,224023,15081,16765,214444,21916,20112,12235,74187,102774,50505,72400,235180,12649,225020,…	Nanos2,Kank2,Smg6,Atg7,Esr1,Nat10,Tbc1d7,Bub3,Npm1,Opa1,Pfn2,Tinf2,Malsu1,Tmeff2,Map1b,Higd1a,Cep97,Tnks,Capza2,Tbcd,Ppfia1,Pecam1,Eml4,Mdm1,Hnrnpc,Fxn,Gnl3l,Tigar,Tnks2,Src,Phldb2,Lrrk2,Snca,Clec16a,Tmod2,Tex14,Lima1,Mos,Pink1,Mtbp,Mid1ip1,Gmfb,Gpx1,Cep192,Inpp5k,Terf1,Tom1l1,Nbn,Ppargc1a,Rtel1,Klhl22,H3f3b,Stmn1,Cdk5rap2,Tmod1,Rps6ka2,Bub1,Katnb1,Bbs4,Ercc4,Pinx1,Fez1,Chek1,Fez2,Nol3,Parl,Mad2l…
GO:0043436	oxoacid metabolic process	2.30742e-06	-12.9794	806	305	0.0479786	6357	20933	67247,14245,54122,269180,270076,242585,74205,70757,27402,14590,18777,77219,229487,18641,241113,30963,22178,19223,56690,55951,60527,109093,14287,112405,107029,11977,102247,17918,11363,16832,52538,14645,22239,211666,93747,11992,94184,16889,213350,78920,70316,16993,110460,11429,18452,69955,229709,18655,17449,60525,13382,227095,231327,50776,216739,70120,74244,18746,12040,102436,56693,56174,242669,181…	Marc2,Lpin1,Uevld,Inpp4a,Gcdh,Slc35d1,Acsl3,Hacd2,Pdhx,Ggh,Lypla1,Ptgr2,Gatb,Pfkl,Prkag3,Hacd1,Tyrp1,Ptgis,Mlycd,Mpc1,Fads3,Rars2,Fpgs,Egln1,Me2,Atp7a,Gpat4,Myo5a,Acadl,Ldhb,Acaa2,Glul,Ugt8a,Mgst2,Echs1,Auh,Pdxdc1,Lipa,Pddc1,Dlst,Ndufab1,Lta4h,Acat2,Aco2,P4ha2,Fars2,Ahcyl1,Pgk1,Mdh1,Acss2,Dld,Hibch,Ppat,Polg2,Acsl6,Yars2,Atg7,Pkm,Bckdhb,Lars2,Crtap,Nagk,Azin2,Nos1,Tlr4,Ndufs6,Eno2,Chst14,Pcmt1,Hk…
GO:0051054	positive regulation of DNA metabolic process	2.38894e-06	-12.9447	211	96	0.0151015	6357	20933	27354,19017,269400,26413,13433,72544,17311,14051,234371,17688,13645,12611,319801,11908,12566,74493,20779,13804,12461,23892,26430,231440,14186,26398,19718,21951,52679,28113,93759,105377,14048,26419,12465,226151,30877,71991,22042,13649,16337,70620,14050,67459,93765,13010,52864,18148,18761,17165,319604,16476,11785,320209,58230,244694,108961,327762,106344,55982,15499,11745,213389,12545,237877,21853,7…	Nbn,Ppargc1a,Rtel1,Mapk1,Dnmt1,Exosc6,Kitl,Eya4,Tmem161a,Msh6,Egf,Cebpg,Tigar,Atf1,Cdk2,Tnks2,Src,Endog,Cct2,Grem1,Parg,Parm1,Fgfr4,Map2k4,Rfc2,Tnks,E2f7,Tinf2,Sirt1,Slf1,Eya1,Mapk8,Cct5,Fam178a,Gnl3,Ercc8,Tfrc,Egfr,Insr,Ube2v2,Eya3,Nvl,Ube2n,Cst3,Slx4,Npm1,Prkcq,Mapkapk5,Fam168a,Jun,Apbb1,Ddx11,Rnf8,Kdm4d,E2f8,Dna2,Rfc4,Paxip1,Hsf1,Anxa3,Prdm9,Cdc7,Atad5,Timeless,Nudt16,Hnrnpd,Rfc3,Whsc1,Csf2,Ca…
GO:1902580	single-organism cellular localization	2.40135e-06	-12.9395	718	275	0.0432594	6357	20933	268566,16649,114896,55989,19684,20615,73668,67451,22631,72515,22350,18198,52028,16401,240614,54141,170829,320727,140740,67286,71435,74254,66352,56297,107513,18195,19055,21854,75782,16650,381269,68328,19325,73192,11865,66810,73689,72421,19305,68080,67963,108705,67378,94245,108012,171531,76568,52250,78802,50850,64930,13518,18472,18141,27008,108907,67844,19062,93835,11303,66053,66661,76108,227699,17…	Gphn,Kpna4,Afg3l1,Nop58,Rdx,Snapin,Ttc21b,Pkp2,Ywhaz,Wdr43,Ezr,Musk,Bbs1,Itga4,Ranbp6,Spag5,Tram2,Ipo8,Sec63,Ift22,Arhgap21,Gpn1,Blzf1,Arl6,Ssr1,Nsf,Ppp3ca,Timm17a,Lca5,Kpna6,Mreg,Rab13,Rab10,Xpot,Arntl,Rbm22,Bloc1s2,Ttc30b,Pex5,Gpn3,Npc2,Pttg1ip,Bbs2,Dtnbp1,Ap1s2,Mlph,Ift46,Reep1,Ttc30a1,Spast,Tsc1,Dst,Pafah1b1,Nup50,Micall1,Nusap1,Rab32,Inpp5k,Amn,Abca1,Ppil2,Srp72,Rap2a,Nup188,Mos,Lrrk2,Kif23,…
GO:0045739	positive regulation of DNA repair	2.43278e-06	-12.9265	45	29	0.0045619	6357	20933	3.19604e+151	Fam168a,Uimc1,Parg,Fam175a,Pcna,Rif1,Eya3,Ube2n,Ube2v2,Nudt16,Ercc8,Mrnip,Tigar,Egfr,Rnf168,Timeless,Cebpg,Fam178a,Pnp,Slf1,Eya1,Sirt1,Eya4,Tmem161a,Kdm4d,Apbb1,Rnf8,Ddx11,Apex1
GO:0043414	macromolecule methylation	2.51719e-06	-12.8924	190	88	0.013843	6357	20933	14056,69726,15182,73582,102182,213389,13018,104263,73694,238505,239122,218214,103136,77683,20586,100609,52690,17257,107823,214133,52615,18193,23942,57295,13434,67493,74753,72167,109263,67667,22715,60532,210529,73419,50708,212728,106338,20230,54343,50709,217038,76357,116940,77305,99890,74322,64707,207965,140858,13433,14911,18537,19346,66310,14852,67390,66185,13435,66317,15278,72181,15468,331623,38…	Ezh2,Smyd3,Hdac2,Camkmt,Prmt9,Prdm9,Ctcf,Kdm3a,Ndufaf7,Mtr,Setdb2,Kdm1b,Pwp1,Ehmt1,Smarca4,Nsun5,Setd3,Mecp2,Whsc1,Tet2,Suz12,Nsd1,Mta2,Icmt,Trdmt1,Mettl16,Trmo,Thumpd2,Rlf,Alkbh8,Zfp57,Wtap,Mettl14,Armt1,Hist1h1c,Tarbp1,Nsun3,Satb1,Atf7ip,Hist1h1e,Mrm1,Trmt5,Tgs1,Wdr82,Prmt6,Cxxc1,Suv39h2,Vcpkmt,Wdr5,Dnmt1,Thumpd3,Pcmt1,Rab6a,Dpy30,Gspt1,Rnmtl1,1110037F02Rik,Dnmt3a,Wdr61,Tfb2m,Nsun4,Prmt2,Bend3,…
GO:0009896	positive regulation of catabolic process	2.54229e-06	-12.8824	257	113	0.0177757	6357	20933	170930,15499,14083,11789,66245,20660,14265,11502,53380,217351,67664,213988,14555,14629,70797,11818,56440,18195,17246,19246,14466,18983,260302,22160,100494,26874,338359,53312,16396,56458,211770,230738,50873,22225,242960,106042,13132,26374,27059,83814,22218,71701,192193,234594,19684,71999,217410,50754,105787,18458,93687,110616,23806,268291,56812,69807,72607,27681,14694,218203,56085,59036,21929,2086…	Sumo2,Hsf1,Ptk2,Apc,Hspbp1,Sorl1,Fmr1,Adam9,Psmd10,Tnrc6c,Rnf125,Tnrc6b,Gpd1,Gclc,Ankib1,Apoh,Snx1,Nsf,Mdm2,Ptpn1,Gba,Cnot7,Gga3,Twist1,Zfand2a,Abcd2,Supv3l1,Nub1,Itch,Foxo1,Trib1,Zc3h12a,Park2,Usp5,Fbxl5,Prickle1,Dab2,Rfwd2,Sh3d19,Nedd4l,Sumo1,Pnpt1,Edem1,Cnot1,Rdx,Fbxo22,Trib2,Fbxw7,Prkaa1,Pabpc1,Csnk1a1,Atxn3,Arih1,Rnf217,Dnajb2,Trim32,Usp13,Snf8,Rack1,Mylip,Ubqln1,Dact1,Tnfaip3,Cblb,Psen1,Ezr…
GO:0022411	cellular component disassembly	2.63739e-06	-12.8457	164	78	0.0122699	6357	20933	50873,74781,20583,68184,104015,56208,72018,83431,67841,12421,56431,228421,15185,16573,67526,320806,20595,329015,13368,20588,76366,109242,24015,242557,211323,56422,22367,269275,20586,54194,66993,67391,66840,67006,67443,54636,107338,20587,230908,381293,56471,228361,11793,320878,80280,16865,194401,20479,108853,235040,57376,50850,22388,66169,116733,74244,23830,66734,17957,16765,18472,68572,108124,937…	Park2,Wipi2,Snai2,Denr,Synj1,Becn1,Fundc1,Ndel1,Atg3,Rb1cc1,Dstn,Kif18a,Hdac6,Kif5b,Atg12,Gfm2,Smn1,Atg2a,Dffb,Smarcc1,Mtif3,Kif24,Abce1,Atg4c,Nrg1,Hbs1l,Vrk1,Acvr1c,Smarca4,Akap8l,Smarcd3,Fundc2,Wdr45b,Cisd2,Map1lc3b,Wdr45,Gbf1,Smarcb1,Tardbp,Kif14,Stmn4,Ambra1,Atg5,Mical2,Cdk5rap3,Eif2d,Mical3,Vps4b,Mtrf1l,Atg4d,Smarce1,Spast,Wdr1,Tomm7,Vps4a,Atg7,Capn10,Map1lc3a,Napb,Stmn1,Pafah1b1,Mrpl58,Napa…
GO:0045732	positive regulation of protein catabolic process	2.90172e-06	-12.7502	180	84	0.0132138	6357	20933	192193,217410,71999,19684,26374,13132,106042,27059,22225,50873,242960,22218,83814,21929,59036,14694,27681,56085,218203,77128,71492,20333,22350,19164,208650,93687,110616,50754,72607,69807,268291,56812,23806,53380,11502,14265,67664,66245,11789,14083,170930,20660,100494,260302,56458,211770,16396,53312,70797,14629,14466,17246,18195,56440,52551,218215,17131,230598,22433,21938,12398,70620,99929,74244,2…	Edem1,Trib2,Fbxo22,Rdx,Rfwd2,Dab2,Prickle1,Sh3d19,Usp5,Park2,Fbxl5,Sumo1,Nedd4l,Tnfaip3,Dact1,Rack1,Snf8,Ubqln1,Mylip,Crebrf,Bbs7,Sec22b,Ezr,Psen1,Cblb,Csnk1a1,Atxn3,Fbxw7,Usp13,Trim32,Rnf217,Dnajb2,Arih1,Psmd10,Adam9,Fmr1,Rnf125,Hspbp1,Apc,Ptk2,Sumo2,Sorl1,Zfand2a,Gga3,Foxo1,Trib1,Itch,Nub1,Ankib1,Gclc,Gba,Mdm2,Nsf,Snx1,Sgta,Rnf144b,Smad7,Nrd1,Xbp1,Tnfrsf1b,Cbfa2t3,Ube2v2,Tiparp,Atg7,Taf1,Nedd4,…
GO:0042775	mitochondrial ATP synthesis coupled electron transport	2.91895e-06	-12.7443	41	27	0.00424729	6357	20933	2.06172e+136	Snca,Uqcrc1,Uqcc3,Ndufa7,Uqcr10,Mecp2,Ndufb9,Cox7c,Ndufc2,Uqcrq,Dld,Ndufa10,Bdnf,Sdha,Cox5a,Sdhc,Ndufs6,Ndufb8,Ndufv2,Cox6a2,Coq7,Mtch2,Cox8a,Cox6a1,Cox8c,Cox8b,Uqcrc2
GO:1902115	regulation of organelle assembly	2.92935e-06	-12.7407	154	74	0.0116407	6357	20933	70799,72068,68943,319675,66725,215351,20779,71116,74302,18286,214444,18711,18148,67046,20620,20479,76568,68942,64143,229722,21821,104625,98732,64009,75811,19822,54324,22088,26419,381644,17168,17245,212514,74201,11793,228361,74256,209478,195208,17128,219103,233871,100855,72333,235072,227753,12981,17260,76983,15182,68729,20844,20239,18571,54633,225020,226407,19338,235180,75547,67841,22350,102774,13…	Cep192,Cnot2,Pink1,Cep295,Lrrk2,Senp6,Src,Stx18,Mtmr3,Odf2,Cdk5rap2,Pikfyve,Npm1,Tbc1d7,Plk2,Vps4b,Ift46,Chmp2b,Ralb,5330417C22Rik,Ift88,Cnot6,Rab3gap2,Syne1,Saxo1,Rnf4,Arhgef5,Tsg101,Mapk8,Cep135,Nprl3,Mdm1,Spice1,Cep97,Atg5,Ambra1,Cyld,Tbc1d12,Dcdc2a,Smad4,Cenpj,Atxn2l,Tbc1d14,Palld,Sept7,Gsn,Csf2,Mef2c,Scfd1,Hdac2,Trim37,Stam,Atxn2,Pdcd6ip,Pqbp1,Fez2,Rab3gap1,Rab33b,Fez1,Akap13,Atg3,Ezr,Bbs4,E…
GO:0006338	chromatin remodeling	3.02638e-06	-12.7081	121	61	0.00959572	6357	20933	239985,50927,12611,11461,56505,29871,14815,20586,228536,20588,66578,320713,93760,15182,67019,15081,73390,64707,93696,66471,101685,67772,58230,53893,21969,66336,21958,22130,66233,23808,12649,320790,114642,233904,225280,207165,13990,330409,231151,56456,57376,20230,19231,56249,18519,20587,208727,23942,66993,22385,217031,71952,433759,15381,68142,17191,17692,22061,67733,15078,21761	Arid1b,Nasp,Cebpg,Actb,Ruvbl1,Scmh1,Nr3c1,Smarca4,Bahd1,Smarcc1,Mis18a,Mysm1,Arid1a,Hdac2,Actr6,H3f3b,Msl3l2,Suv39h2,Chrac1,Anp32e,Spty2d1,Chd8,Rnf8,Nudt5,Top1,Cenpp,Tnp1,Ttf1,Dmap1,Ash2l,Chek1,Chd7,Brdt,Setd1a,Ino80c,Bptf,Smarcad1,Cecr2,Tada2b,Actl6a,Smarce1,Satb1,Ptma,Actr8,Kat2b,Smarcb1,Hdac4,Mta2,Smarcd3,Baz1b,Tada2a,2410016O06Rik,Hdac1,Hnrnpc,Ino80,Mbd2,Msl3,Trp63,Itgb3bp,H3f3a,Morf4l1
GO:0045930	negative regulation of mitotic cell cycle	3.2124e-06	-12.6485	183	85	0.0133711	6357	20933	72611,12235,17535,59036,68067,227331,13000,56150,12649,26951,107047,67941,17120,20460,22061,102060,71701,13197,77011,76454,12366,17685,21974,231724,94315,109019,74996,68193,22137,17246,234736,12236,216810,19090,19290,26992,229776,105782,12162,229543,100683,14056,235559,11789,17127,235041,11909,13649,20620,12237,13982,231600,19891,80280,545622,269582,21951,52679,105377,66131,17300,69754,15468,1436…	Zfp655,Bub1,Mre11a,Dact1,Mrnip,Gigyf2,Csnk2a2,Mad2l1,Chek1,Zw10,Psmg2,Rps27l,Mad1l1,Stil,Trp63,Gadd45gip1,Pnpt1,Gadd45a,Ticrr,Fbxo31,Casp2,Msh2,Top2b,Rad9b,Prcc,Nabp1,Usp47,Rpl24,Ttk,Mdm2,Rfwd3,Bub1b,Tom1l2,Prkdc,Pura,Brd7,Cdc14a,Scrib,Bmp7,Ints3,Trrap,Ezh2,Topbp1,Apc,Smad3,Kank2,Atf2,Egfr,Plk2,Bub3,Esr1,Chfr,Rpa2,Cdk5rap3,Ptpn3,Clspn,Tnks,E2f7,Slf1,Tipin,Foxc1,Fbxo7,Prmt2,Fzd3,Tex14,Zwint,Rad17,…
GO:0007080	mitotic metaphase plate congression	3.36977e-06	-12.6007	37	25	0.00393267	6357	20933	5.62083e+131	Becn1,Ccnb1,Kif14,Chmp7,Mad1l1,Spdl1,Seh1l,Kif2c,Kpnb1,Zw10,Cenpc1,Chmp1b,Rrs1,Chmp5,Cdc23,Ndc80,Vps4a,Pinx1,Champ1,Mis12,Chmp2b,Vps4b,Kif18a,Kif22,Rab11a
GO:0035966	response to topologically incorrect protein	3.39699e-06	-12.5926	99	52	0.00817996	6357	20933	15505,11910,140499,66799,56491,77128,52231,100037258,208647,80280,69065,108687,110616,23802,15185,67031,30931,67819,192193,11911,110213,328572,22433,50873,50527,66435,27103,99011,27368,236904,75212,50762,19106,66967,18415,19246,64136,69310,326622,76867,80517,67812,13666,226641,14828,26427,15519,109815,17341,76577,68366,320011	Hsph1,Atf3,Ube2j2,Ube2w,Vapb,Crebrf,Ankzf1,Dnajc3,Creb3l2,Cdk5rap3,Chac1,Edem2,Atxn3,Amfr,Hdac6,Upf3a,Tor1a,Derl1,Edem1,Atf4,Tmbim6,Ep300,Xbp1,Park2,Ero1l,Uggt2,Eif2ak4,Pomt1,Tbl2,Klhl15,Rnf121,Fbxo6,Eif2ak2,Edem3,Hspa4l,Ptpn1,Sdf2l1,Pacrg,Upf2,Rhbdd1,Herpud2,Ubxn4,Eif2ak3,Atf6,Hspa5,Creb3l1,Hsp90aa1,Selenos,Bhlha15,Faf2,Tmem129,Uggt1
GO:0009141	nucleoside triphosphate metabolic process	3.54432e-06	-12.5502	186	86	0.0135284	6357	20933	51797,18641,110074,11949,21871,66416,11966,68870,22272,56012,22169,67059,67003,18950,268566,75483,68055,17257,12867,75686,17685,11946,107197,11534,11958,11951,18605,72141,66454,68197,27369,73694,53893,66945,72900,11977,11674,66588,56428,18293,11516,66218,14751,68550,18746,230163,382985,12064,11717,18648,93685,67273,13382,12862,56045,18102,17434,433182,16434,14923,67264,66052,66422,14297,18655,121…	Ctps,Pfkl,Dut,Atp5c1,Atp6v0a2,Ndufa7,Atp6v1b2,Ak8,Uqcrq,Pgam2,Cmpk2,Ola1,Uqcrc2,Pnp,Gphn,Cox8c,Atp5s,Mecp2,Cox7c,Nudt16,Msh2,Atp5a1,Uqcc3,Adk,Atp5k,Atp5g1,Enpp1,Adpgk,Nmnat1,Ndufc2,Dguok,Ndufaf7,Nudt5,Sdha,Ndufv2,Atp7a,Aldoa,Cmpk1,Mtch2,Ogdh,Adcyap1,Ndufb9,Gpi1,Tefm,Pkm,Aldob,Rrm2b,Bdnf,Ampd3,Pgam1,Entpd7,Ndufa10,Dld,Cox6a2,Samhd1,Nme1,Mocs2,Eno1b,Itpa,Guk1,Ndufb8,Sdhc,Dctpp1,Fxn,Pgk1,Bpgm,Cox8a,…
GO:0032786	positive regulation of DNA-templated transcription, elongation	3.59815e-06	-12.5351	27	20	0.00314614	6357	20933	9.80535e+106	Gtf2f1,Cbx7,Ell2,Gtf2f2,Eloc,Cdc73,Ercc6,Supt5,Dab2,Eapp,Thoc5,Supt6,Map2k1,Ctr9,Supt4a,Thoc1,Rtf1,Wdr61,Supt16,Leo1
GO:0034243	regulation of transcription elongation from RNA polymerase II promoter	3.75233e-06	-12.4931	31	22	0.00346075	6357	20933	2.09226e+113	Supt4a,Nelfb,Rtf1,Nelfa,Rnf168,Wdr61,Supt16,Leo1,Gtf2f1,Ezh2,Cbx7,Zmynd11,Ell2,Gtf2f2,Eloc,Cdc73,Dab2,Eapp,Rnf8,Supt6,Ctr9,Map2k1
GO:0019752	carboxylic acid metabolic process	3.78139e-06	-12.4854	751	285	0.0448325	6357	20933	107141,170718,108147,66590,70456,54375,26378,64385,66514,56454,57295,107869,229363,13614,104923,71147,69906,109900,20851,27364,66945,52633,15450,18293,102294,107045,229211,24088,67873,26874,20524,14873,17257,13110,72141,192170,22229,74121,231326,20917,19016,226414,68263,212898,19305,18597,23874,17768,12183,14874,27267,14719,67383,11364,17117,110446,70396,98314,58810,26416,67452,15107,319901,69219…	Cyp2c50,Idh3b,Atic,Farsa,Mpc2,Azin1,Decr2,Cyp4f14,Asrgl1,Aldh18a1,Icmt,Cth,Gmps,Edn1,Adi1,Oxsm,Slc25a32,Asl,Stat5b,Srr,Sdha,Nit2,Lipc,Ogdh,Cyp4v3,Lars,Acad9,Tlr2,Mri1,Abcd2,Slc25a17,Gsto1,Mecp2,Cyp2j6,Adpgk,Eif4a3,Ucp3,Acoxl,Aasdh,Suclg2,Pparg,Dars,Pdhb,Dse,Pex5,Pdha1,Farsb,Mthfd2,Bpgm,Gstz1,Cars,Got2,Carnmt1,Acadm,Amacr,Acat1,Asnsd1,D2hgdh,Akr1a1,Mapk14,Pnpla8,Hadh,Dsel,Ddah1,Amdhd2,Gls,Mthfsl,A…
GO:0006461	protein complex assembly	3.9245e-06	-12.4483	846	317	0.0498663	6357	20933	53323,73694,225887,103468,382056,319155,53895,14682,75786,17364,24075,69259,30934,380921,55991,71238,21355,76178,18000,89867,103768,56088,56075,26951,12617,68922,68653,50873,100900,22404,19079,20481,11482,16531,14672,66278,13405,21916,13852,69089,20656,105787,230597,26395,57342,13666,229877,71844,66537,229937,12558,20619,226519,53330,234309,109168,11564,108058,66311,21371,66384,71393,11783,77116,…	Ube2k,Ndufaf7,Ndufs8,Nup107,Crtc1,Hist1h4c,Clpp,Gnaq,Ckap5,Trpm1,Taf10,Kctd5,Tor1b,Dgkh,Panx1,Sdhaf3,Tap2,Coa5,Sept2,Sec16b,Tubg2,Psmg1,Pdss1,Zw10,Cenpc1,Dnaic1,Samm50,Park2,Hscb,Wiz,Prkab1,Ski,Acvrl1,Kcnma1,Gna11,Smim20,Dmd,Tmod1,Stx2,Oxa1l,Sod2,Prkaa1,Zfyve9,Map2k1,Parva,Eif2ak3,Rap1gds1,Nupl1,Pomp,Znhit6,Cdh2,Snap23,Lamc1,Vamp4,Cbr4,Atl3,Adsl,Camk2d,Cenpw,Tbca,Srp19,Kctd6,Apaf1,Mtmr2,Brk1,Cox2…
GO:0006119	oxidative phosphorylation	4.15515e-06	-12.3912	48	30	0.00471921	6357	20933	5.64281e+151	Mtch2,Cox8a,Cox8b,Cox8c,Cox6a1,Fxn,Uqcrc2,Cox5a,Sdha,Ndufb8,Ndufv2,Sdhc,Ndufs6,Coq7,Cox6a2,Ndufc2,Uqcrq,Dld,Ndufa10,Bdnf,Msh2,Uqcrc1,Uqcc3,Snca,Ndufa7,Ndufb9,Uqcr10,Mecp2,Cox7c,Tefm
GO:0050684	regulation of mRNA processing	4.19046e-06	-12.3827	102	53	0.00833727	6357	20933	13992,15387,433702,101214,15499,214498,19826,17149,22185,67039,14265,268697,12455,108014,108013,68927,664883,66354,22722,192170,236732,230753,52897,73473,225027,56215,67010,93686,229709,109331,21841,20924,14105,20637,20815,12537,110213,57317,22083,231386,20926,16589,18148,72486,60532,18789,12261,268859,56758,28000,67996,235497,66660	Khdrbs3,Hnrnpk,Ncbp1,Tra2a,Hsf1,Cdc73,Rnps1,Magoh,U2af2,Rbm25,Fmr1,Ccnb1,Ccnt1,Srsf9,Celf4,Ptcd2,Nova1,Snw1,Zfp64,Eif4a3,Rbm10,Thrap3,Rbfox3,Iws1,Srsf7,Acin1,Rbm7,Rbfox2,Ahcyl1,Rnf20,Tia1,Supt5,Srsf10,Snrnp70,Srpk1,Cdk11b,Tmbim6,Srsf4,Ctr9,Ythdc1,Supt6,Uhmk1,Npm1,Rnf219,Wtap,Papola,C1qbp,Rbfox1,Mbnl1,Prpf19,Srsf6,Leo1,Sltm
GO:0019058	viral life cycle	4.26446e-06	-12.3652	85	46	0.00723612	6357	20933	271457,223691,12390,13030,68576,66201,66700,21355,67231,27103,18521,12389,110355,22278,78610,226422,18563,11793,73711,20823,72543,107829,20587,216238,22088,76959,67064,13858,73666,66231,74244,116733,72949,67778,19878,73683,77040,18571,224020,225160,16410,58235,20479,68942,13669,270096	Rab5a,Eif3l,Cav2,Ctsb,Lamtor5,Vta1,Chmp3,Tap2,Tbc1d20,Eif2ak4,Pcbp2,Cav1,Grk2,Usf1,Uvrag,Rab29,Pcx,Atg5,Mvb12a,Ssb,Mvb12b,Thoc5,Smarcb1,Eea1,Tsg101,Chmp5,Chmp1b,Eps15,Thoc3,Thoc7,Atg7,Vps4a,Ccnt2,Zfp639,Rock2,Atg16l2,Atg16l1,Pdcd6ip,Pi4ka,Thoc1,Itgav,Nectin1,Vps4b,Chmp2b,Eif3a,Mon1b
GO:0043484	regulation of RNA splicing	4.27942e-06	-12.3617	107	55	0.00865188	6357	20933	56758,68052,28000,20384,18708,67996,73713,18148,72692,12261,60532,54633,72486,268859,114642,20637,66810,110213,22687,66549,57317,16589,231386,12750,67010,93686,21841,110809,14105,69131,236732,230753,54367,52897,56215,225027,108013,108014,66354,56195,192170,22722,98758,19826,56190,67039,22185,59013,17149,14265,13992,27370,20595,15387,101214	Mbnl1,Rps13,Prpf19,Srsf5,Pik3r1,Srsf6,Rbm20,Npm1,Hnrnpll,C1qbp,Wtap,Pqbp1,Rnf219,Rbfox1,Brdt,Snrnp70,Rbm22,Tmbim6,Zpr1,Aggf1,Srsf4,Uhmk1,Ythdc1,Clk4,Rbm7,Rbfox2,Tia1,Srsf1,Srsf10,Cdk12,Rbm10,Thrap3,Zfp326,Rbfox3,Acin1,Srsf7,Celf4,Srsf9,Snw1,Ptbp2,Eif4a3,Zfp64,Hnrnpf,Rnps1,Rbm38,Rbm25,U2af2,Hnrnph1,Magoh,Fmr1,Khdrbs3,Rps26,Smn1,Hnrnpk,Tra2a
GO:0071559	response to transforming growth factor beta	4.31891e-06	-12.3525	112	57	0.00896649	6357	20933	22284,17127,14573,75901,17700,12394,230597,12167,21809,108075,18099,17126,11477,17131,12163,21814,55994,13132,80707,21808,11482,16412,12827,21812,17260,16963,12928,14538,20779,56330,269275,26409,12912,19042,12562,21813,226352,17128,15258,11783,20679,12843,12389,14360,74117,11502,68010,53618,19017,16476,14281,13433,17684,14479,14083,66513,268977	Usp9x,Smad3,Gdnf,Dcp1a,Mstn,Runx1,Zfyve9,Bmpr1b,Tgfb3,Ltbp4,Nlk,Smad2,Acvr1,Smad7,Bmp8a,Tgfbr3,Smad9,Dab2,Wwox,Tgfb2,Acvrl1,Itgb1,Col4a2,Tgfbr1,Mef2c,Xcl1,Crk,Gcnt2,Src,Pdcd5,Acvr1c,Map3k7,Creb1,Ppm1a,Cdh5,Tgfbr2,Epb41l5,Smad4,Hipk2,Apaf1,Sox6,Col1a2,Cav1,Fyn,Actr3,Adam9,Bambi,Fut8,Ppargc1a,Jun,Fos,Dnmt1,Cited2,Usp15,Ptk2,Tab1,Ltbp1
GO:0070271	protein complex biogenesis	4.40604e-06	-12.3325	847	317	0.0498663	6357	20933	108679,108903,116837,63873,68339,218210,52535,94221,259279,74143,12385,11835,75705,69487,231327,434246,17248,17127,19122,19089,11829,19060,21780,215999,383348,20422,83679,227377,12954,66998,26886,17025,233276,70799,432611,11690,240354,20133,66388,97122,13858,13132,215114,17191,107047,67819,22061,27275,67738,23802,20085,67105,68581,83431,56398,76467,21871,67466,67952,18641,71902,106931,15499,11789…	Cops8,Tbcd,Rims1,Trpv4,Ccdc88c,Nup153,Mettl17,Gopc,Tubgcp3,Opa1,Ctnna1,Ar,Eif4b,Ndufaf5,Ppat,Trim72,Mdm4,Smad3,Prnp,Prkcsh,Aqp4,Ppp5c,Tfam,Mcu,Kctd16,Shfm1,Pde4dip,Farp2,Cryaa,Psmd5,Cenph,Alad,Tubgcp5,Cep192,Dnaic2,Alox5ap,Malt1,Rrm1,Cutc,Hist2h4,Eps15,Dab2,Hip1,Mbd2,Psmg2,Derl1,Trp63,Nufip1,Ppid,Amfr,Rps19,Timm21,Tmed10,Ndel1,Chp1,Msrb2,Atp6v0a2,Pdcl,Tomm20,Pfkl,Cand1,Kctd1,Hsf1,Apc,Aqp11,Ppp2r1…
GO:1901361	organic cyclic compound catabolic process	4.49719e-06	-12.3121	287	123	0.0193487	6357	20933	71701,214133,76654,18950,14085,69902,22687,214150,234594,16589,50755,66362,67464,18458,110074,69639,78651,75894,71169,50911,13368,236511,433702,353190,19826,53893,327762,50912,69241,71997,326622,18983,11992,27756,242202,14544,66441,17161,381101,18605,69694,192170,232791,17308,140483,230738,24127,338359,75686,15368,24128,233789,71723,12457,103135,18578,229709,225929,17350,14874,74133,16434,233033,…	Pnpt1,Tet2,Upp2,Pnp,Fah,Mrto4,Zpr1,Ago3,Cnot1,Uhmk1,Fbxo18,Exosc3,Entpd4,Pabpc1,Dut,Exosc8,Lsm6,Adal,Nbas,Exosc9,Dffb,Ago1,Ncbp1,Edc3,Rnps1,Nudt5,Dna2,Exosc10,Polr2d,Smg9,Upf2,Cnot7,Auh,Lsm2,Pde5a,Gda,Magohb,Maoa,Dnph1,Enpp1,Tatdn1,Eif4a3,Cnot3,Mgat1,Hnmt,Zc3h12a,Xrn1,Supv3l1,Nudt16,Hmox1,Xrn2,Smg1,Dhx34,Noct,Pan2,Pde4b,Ahcyl1,Patl1,Mlh1,Gstz1,Smg8,Itpa,Samd4b,Enpp5,Dctpp1,Casc3,Hint1,Lsm1,Hsd11b…
GO:0010941	regulation of cell death	4.51074e-06	-12.309	1527	542	0.0852603	6357	20933	13614,60530,18198,22631,381038,56426,16392,56412,67338,14362,433759,12042,80707,29810,20583,208727,170755,338359,227753,17257,12912,11818,22339,94185,11554,20851,13872,13649,70620,235041,18573,22337,20846,12368,16438,218772,14745,13010,108705,54422,67579,13867,107607,216134,12163,11793,19016,23873,224045,58800,12367,66725,18391,53945,68943,78334,14775,223701,52906,12638,11757,64930,58250,69305,69…	Edn1,Fignl1,Musk,Ywhaz,Parl,Pdcd10,Isl1,Noa1,Rffl,Fzd1,Hdac1,Bcl10,Wwox,Bag3,Snai2,Hdac4,Sgk3,Supv3l1,Gsn,Mecp2,Creb1,Apoh,Vegfa,Tnfrsf21,Adrb1,Stat5b,Ercc3,Egfr,Ube2v2,Kank2,Pde1a,Vdr,Stat1,Casp6,Itpr1,Rarb,Lpar1,Cst3,Pttg1ip,Barhl1,Cpeb4,Erbb3,Nod1,Pdxk,Bmp8a,Atg5,Pparg,Faim,Eif2b5,Trpm7,Casp3,Lrrk2,Sigmar1,Slc40a1,Pink1,Cdk19,Gpx1,Mkl1,Ahi1,Cftr,Prdx3,Tsc1,Chst11,Dcps,Zfp746,Ackr3,Apbb2,Mycn,P…
GO:0006260	DNA replication	4.68444e-06	-12.2713	166	78	0.0122699	6357	20933	20133,26447,19819,50927,66634,104806,68240,18393,319583,22427,78903,19704,71567,18974,19076,272158,212377,69270,269400,18027,78833,665775,54380,21376,18028,22791,12447,50776,19891,382985,381760,52864,225160,67967,26429,18969,19687,56452,12190,19718,105377,66131,19714,69263,27214,237877,117599,12545,21974,72749,56878,77782,26428,58887,18975,327762,17219,28019,69928,66044,19290,320209,106344,235559…	Rrm1,Poli,Rnaseh1,Nasp,Mcm8,Fancm,Rpa3,Orc2,Lig4,Wrn,Wrnip1,Upf1,Mcm9,Pole2,Prim2,Poln,Mms22l,Gins1,Rtel1,Nfia,Gins3,Bod1l,Smarcal1,Tbrg1,Nfib,Dnajc2,Ccne1,Polg2,Rpa2,Rrm2b,Ssbp1,Slx4,Thoc1,Pold3,Orc5,Pola2,Rfc1,Orc6,Brca2,Rfc2,Slf1,Tipin,Rev3l,Rfc3,Dbf4,Atad5,Helb,Cdc7,Top2b,Tonsl,Rbms1,Polq,Orc4,Repin1,Polg,Dna2,Mcm6,Ing4,Apitd1,Dtd1,Pura,Ddx11,Rfc4,Topbp1,Gins4,Supt16,Kat7,Top1,Slbp,Orc1,Pcna,…
GO:1902275	regulation of chromatin organization	4.9894e-06	-12.2082	161	76	0.0119553	6357	20933	24116,16392,214669,12649,12053,99982,328572,73086,20583,14245,217031,18193,54194,230674,22160,214899,17257,22339,20375,17128,24074,26992,69260,13018,104263,14265,244694,76804,18676,55982,319974,80748,75302,214855,26914,74244,53890,231151,320817,93765,98403,56399,17765,17345,76246,233904,71175,11793,67367,20926,13626,22083,58521,93759,18519,20587,22433,71458,109331,73473,66317,20617,16468,18760,20…	Nelfa,Isl1,L3mbtl2,Chek1,Bcl6,Kdm1a,Ep300,Rps6ka5,Snai2,Lpin1,Tada2a,Nsd1,Akap8l,Kdm4a,Twist1,Kdm5a,Mecp2,Vegfa,Spi1,Smad4,Taf7,Brd7,Ing2,Ctcf,Kdm3a,Fmr1,Kdm4d,Kdm4c,Phf2,Paxip1,Auts2,BC004004,Asxl2,Arid5a,H2afy,Atg7,Sart3,Tada2b,Atad2b,Ube2n,Zfp451,Akap8,Mtf2,Mki67,Rtf1,Setd1a,Nipbl,Atg5,Paxbp1,Supt6,Eed,Ctr9,Eid1,Sirt1,Kat2b,Smarcb1,Xbp1,Bcor,Rnf20,Iws1,Wdr61,Snca,Jarid2,Prkd1,Slk,Tet1,Phf19,Pi…
GO:0051983	regulation of chromosome segregation	5.0628e-06	-12.1936	83	45	0.00707881	6357	20933	268697,235661,224023,320209,73804,80913,59126,11789,54141,71514,226026,26934,52563,327799,17451,83560,67241,12236,68549,105837,52206,70799,22137,21749,17120,20460,12006,56208,21951,26951,107047,226151,105377,67052,26914,105988,12235,217232,56150,19357,17345,30949,218914,13000,12237	Ccnb1,Dync1li1,Klhl22,Ddx11,Kif2c,Pum2,Nek6,Apc,Spag5,Sfpq,Smc5,Racgap1,Cdc23,Usp44,Mos,Tex14,Smc6,Bub1b,Sgol2a,Mtbp,Anapc4,Cep192,Ttk,Terf1,Mad1l1,Stil,Axin2,Becn1,Tnks,Zw10,Psmg2,Fam178a,Slf1,Ndc80,H2afy,Espl1,Bub1,Cdc27,Mad2l1,Rad21,Mki67,Lcmt1,Wapl,Csnk2a2,Bub3
GO:0006473	protein acetylation	5.099e-06	-12.1865	120	60	0.00943841	6357	20933	66233,269003,56292,217127,228019,66979,56456,270627,109115,75560,77853,15161,75565,217031,13831,18519,93759,21761,107435,71777,226976,12914,12190,17928,228714,328572,66897,17692,77805,94092,13486,18984,74763,225895,20375,17257,331623,64050,208146,20586,78783,56505,73674,67773,73390,27878,73247,24075,217588,100683,70088,74195,100043497,102162,140858,17448,59001,11785,109900,28019	Dmap1,Sap130,Naa10,Kat7,Mettl8,Pole4,Actl6a,Taf1,Supt3,Ep400,Msl2,Hcfc1,Sgf29,Tada2a,Epc1,Kat2b,Sirt1,Morf4l1,Hat1,Ing3,Kansl3,Crebbp,Brca2,Myog,Csrp2bp,Ep300,Naa16,Msl3,Esco1,Trim16,Dr1,Por,Naa60,Taf6l,Spi1,Mecp2,Bend3,Yeats4,Yeats2,Smarca4,Brpf1,Ruvbl1,Wdr75,Kat8,Msl3l2,Tada1,Mrgbp,Taf10,Mbip,Trrap,Meaf6,Elp3,Nat8f7,Taf5l,Wdr5,Mdh2,Pole3,Apbb1,Asl,Ing4
GO:0006733	oxidoreduction coenzyme metabolic process	5.15132e-06	-12.1763	115	58	0.0091238	6357	20933	66646,52064,433182,68263,170718,67834,56075,56012,59027,17449,235339,192185,18597,107766,70456,12183,18655,230163,68646,14571,18746,18641,14148,14751,13382,15929,74080,18115,230027,18648,217707,266690,14149,27402,21881,14555,66108,11674,16832,13807,17448,71883,74637,15277,12850,55951,333433,100198,18293,19895,110208,67876,78920,71365,21351,66454,72141,15357	Rpe,Coq5,Eno1b,Pdhb,Idh3b,Idh3a,Pdss1,Pgam2,Nampt,Mdh1,Dlat,Nadk,Pdha1,Haao,Mpc2,Bpgm,Pgk1,Aldob,Nadk2,Gpd2,Pkm,Pfkl,Fdx1,Gpi1,Dld,Idh3g,Nmnat3,Nnt,Coq3,Pgam1,Coq6,Cyb5r4,Fdxr,Pdhx,Tkt,Gpd1,Ndufa9,Aldoa,Ldhb,Eno2,Mdh2,Coq2,Shpk,Hk2,Coq7,Mpc1,Gpd1l,H6pd,Ogdh,Rpia,Pgd,Coq10b,Dlst,Pdss2,Taldo1,Nmnat1,Adpgk,Hmgcr
GO:0009123	nucleoside monophosphate metabolic process	5.37452e-06	-12.1338	177	82	0.0128992	6357	20933	22272,11966,110074,11949,22247,66416,21871,18641,229363,75483,80914,67003,67059,56012,108147,68197,72141,66454,11951,381101,11958,17685,11946,107197,14450,17257,68055,12867,18293,56428,11566,11516,66945,11674,11977,72900,53893,73694,18648,13382,67273,12064,11717,231327,18746,230163,14751,66218,68550,12868,12861,67126,18655,14297,12183,14923,433182,66052,22171,67264,12862,56409,11637,11975,23959,2…	Uqcrq,Atp6v1b2,Dut,Atp5c1,Umps,Ndufa7,Atp6v0a2,Pfkl,Gmps,Cox8c,Uck2,Uqcrc2,Ola1,Pgam2,Atic,Ndufc2,Adpgk,Nmnat1,Atp5g1,Dnph1,Atp5k,Msh2,Atp5a1,Uqcc3,Gart,Mecp2,Atp5s,Cox7c,Ogdh,Mtch2,Adss,Adcyap1,Sdha,Aldoa,Atp7a,Ndufv2,Nudt5,Ndufaf7,Pgam1,Dld,Ndufa10,Bdnf,Ampd3,Ppat,Pkm,Aldob,Gpi1,Ndufb9,Tefm,Cox8a,Cox6a1,Atp5e,Pgk1,Fxn,Bpgm,Guk1,Eno1b,Sdhc,Tyms,Ndufb8,Cox6a2,Nudt3,Ak2,Atp6v0a1,Nt5e,Parg,Snca,Uqc…
GO:0001701	in utero embryonic development	5.69252e-06	-12.0764	440	177	0.0278433	6357	20933	21872,77097,13649,19089,17127,381022,12394,67888,50776,78912,17126,11835,18194,12702,11477,19782,77579,58231,110809,27494,381695,20587,17300,74376,13804,12946,19062,15213,12850,268697,26413,21679,218490,211064,26572,27078,11487,56305,13614,16401,13135,76044,102423,109145,207165,99982,13855,12649,83431,654470,18763,16410,234740,234594,13445,217325,57295,13132,108655,17308,20586,269275,74778,243931…	Tjp1,Tanc2,Egfr,Prkcsh,Smad3,Kmt2d,Runx1,Tmem100,Polg2,Sp2,Smad2,Ar,Nsdhl,Socs3,Acvr1,Rmrp,Myh10,Stk4,Srsf1,Amot,N4bp2l2,Smarcb1,Foxc1,Myo18b,Endog,Cr1l,Inpp5k,Hey1,Coq7,Ccnb1,Mapk1,Tead4,Btf3,Alkbh1,Cops3,B9d1,Adam10,Pitpnb,Edn1,Itga4,Dad1,Ncapg2,Hinfp,Gins4,Bptf,Kdm1a,Epn2,Chek1,Ndel1,Tctn1,Pkd1,Itgav,Tmem231,Cnot1,Cdk2ap1,Llgl2,Icmt,Dab2,Foxp1,Mgat1,Smarca4,Acvr1c,Rrp7a,Tshz3,Smad4,Sf3b6,Rspo3…
GO:0042773	ATP synthesis coupled electron transport	5.80634e-06	-12.0566	42	27	0.00424729	6357	20933	6.72647e+136	Ndufb8,Ndufv2,Ndufs6,Sdhc,Cox5a,Sdha,Coq7,Cox6a2,Cox8c,Cox8b,Cox6a1,Mtch2,Cox8a,Uqcrc2,Ndufa7,Snca,Uqcrc1,Uqcc3,Cox7c,Ndufb9,Mecp2,Uqcr10,Ndufa10,Dld,Ndufc2,Uqcrq,Bdnf
GO:0000245	spliceosomal complex assembly	5.80634e-06	-12.0566	42	27	0.00424729	6357	20933	2.31387e+142	Ythdc1,Scaf11,Gcfc2,Psip1,Sf3b1,Snrpc,Celf2,Gemin2,Srsf10,Gemin6,Srsf1,Zrsr2,Txnl4a,Isy1,Celf1,Sart3,Srsf6,Prpf19,Mbnl1,Slu7,Luc7l,Luc7l2,Ptbp2,Crnkl1,Nol3,Celf4,Prpf39
GO:1902582	single-organism intracellular transport	5.83905e-06	-12.0509	486	193	0.0303602	6357	20933	74254,71435,17918,140740,94190,16211,67286,105782,20742,240614,170829,320727,19055,67694,21854,75782,70572,242557,107513,74732,15525,227801,20910,16649,55989,114896,17828,72515,67952,16573,235442,52028,20615,67105,22631,170762,83431,12053,226407,73668,69276,26413,30056,71146,27008,18141,64930,13518,18472,20336,19298,66725,71819,13645,227699,20617,107939,64933,80718,69482,19062,16561,66661,11303,7…	Gpn1,Arhgap21,Myo5a,Sec63,Ophn1,Kpnb1,Ift22,Scrib,Sptbn1,Ranbp6,Tram2,Ipo8,Ppp3ca,Ift74,Timm17a,Lca5,Ipo5,Atg4c,Ssr1,Stx11,Hspa4,Dennd1a,Stxbp1,Kpna4,Nop58,Afg3l1,Bloc1s5,Wdr43,Tomm20,Kif5b,Rab8b,Bbs1,Snapin,Timm21,Ywhaz,Nup155,Ndel1,Bcl6,Rab3gap1,Ttc21b,Sec62,Mapk1,Timm9,Golga7b,Micall1,Nup50,Tsc1,Dst,Pafah1b1,Exoc4,Pex19,Lrrk2,Kif23,Egf,Nup188,Snca,Pom121,Ap3m2,Rab27b,Nup35,Inpp5k,Kif1b,Srp72,A…
GO:0006986	response to unfolded protein	6.00949e-06	-12.0222	81	44	0.0069215	6357	20933	208647,100037258,108687,80280,69065,23802,11910,15505,140499,77128,56491,50527,22433,50873,66435,11911,192193,67031,67819,328572,110213,19106,50762,69310,19246,66967,18415,27368,27103,75212,76577,109815,17341,68366,320011,67812,13666,226641,326622,76867,80517,14828,15519,26427	Creb3l2,Dnajc3,Edem2,Cdk5rap3,Chac1,Amfr,Atf3,Hsph1,Ube2j2,Crebrf,Vapb,Ero1l,Xbp1,Park2,Uggt2,Atf4,Edem1,Upf3a,Derl1,Ep300,Tmbim6,Eif2ak2,Fbxo6,Pacrg,Ptpn1,Edem3,Hspa4l,Tbl2,Eif2ak4,Rnf121,Faf2,Selenos,Bhlha15,Tmem129,Uggt1,Ubxn4,Eif2ak3,Atf6,Upf2,Rhbdd1,Herpud2,Hspa5,Hsp90aa1,Creb3l1
GO:0016236	macroautophagy	6.00949e-06	-12.0222	81	44	0.0069215	6357	20933	75964,100502841,77573,329015,70381,100226,100504663,51897,66048,68943,13663,56048,14466,242557,228361,56208,18704,225326,19335,11793,67727,66840,74781,50873,52331,244962,54636,67443,77040,56085,73683,19164,229722,67526,66734,74244,66169,72145,67841,12421,20615,60599,235040,15185	Trappc8,Epg5,Vps33a,Atg2a,Tecpr1,Stx12,Atg14,Atg13,Emc6,Pink1,Ei24,Lgals8,Gba,Atg4c,Ambra1,Becn1,Pik3c2a,Pik3c3,Rab23,Atg5,Stx17,Wdr45b,Wipi2,Park2,Stbd1,Snx14,Wdr45,Map1lc3b,Atg16l1,Ubqln1,Atg16l2,Psen1,5330417C22Rik,Atg12,Map1lc3a,Atg7,Tomm7,Wdfy3,Atg3,Rb1cc1,Snapin,Trp53inp1,Atg4d,Hdac6
GO:0031331	positive regulation of cellular catabolic process	6.02697e-06	-12.0193	196	89	0.0140003	6357	20933	71701,22218,106042,27059,13132,26374,50873,22225,242960,217410,71999,19684,234594,268291,56812,23806,93687,105787,18458,50754,71492,22350,15289,19164,21929,59036,14694,56085,66245,14083,15499,170930,213988,67664,217351,14555,53380,11502,14265,18983,14466,19246,17246,70797,11818,14629,230738,211770,53312,338359,26874,100494,22160,12398,12894,22433,21938,230598,108079,218215,52551,384783,17131,1087…	Pnpt1,Sumo1,Prickle1,Sh3d19,Dab2,Rfwd2,Park2,Usp5,Fbxl5,Trib2,Fbxo22,Rdx,Cnot1,Rnf217,Dnajb2,Arih1,Csnk1a1,Prkaa1,Pabpc1,Fbxw7,Bbs7,Ezr,Hmgb1,Psen1,Tnfaip3,Dact1,Rack1,Ubqln1,Hspbp1,Ptk2,Hsf1,Sumo2,Tnrc6b,Rnf125,Tnrc6c,Gpd1,Psmd10,Adam9,Fmr1,Cnot7,Gba,Ptpn1,Mdm2,Ankib1,Apoh,Gclc,Zc3h12a,Trib1,Nub1,Supv3l1,Abcd2,Zfand2a,Twist1,Cbfa2t3,Cpt1a,Xbp1,Tnfrsf1b,Nrd1,Prkaa2,Rnf144b,Sgta,Irs2,Smad7,Pttg1ip…
GO:0043648	dicarboxylic acid metabolic process	6.48148e-06	-11.9466	86	46	0.00723612	6357	20933	15929,74080,13382,14718,20512,14719,20916,229905,212647,107766,108682,56454,76238,20917,66128,67834,170718,15926,257633,108147,17449,18242,66454,14629,18563,14661,14417,78920,14194,14660,71238,270685,52633,18293,11566,14287,171282,216188,108156,107029,109900,66945,17448,20851,17436,14645	Idh3g,Nmnat3,Dld,Got1,Slc1a3,Got2,Sucla2,Kyat3,Aldh4a1,Haao,Gpt2,Aldh18a1,Grhpr,Suclg2,Mrps36,Idh3a,Idh3b,Idh1,Acsf3,Atic,Mdh1,Oat,Nmnat1,Gclc,Pcx,Glud1,Gad2,Dlst,Fh1,Gls,Sdhaf3,Mthfd1l,Nit2,Ogdh,Adss,Fpgs,Acot4,Aldh1l2,Mthfd1,Me2,Asl,Sdha,Mdh2,Stat5b,Me1,Glul
GO:0060548	negative regulation of cell death	6.54477e-06	-11.9368	958	353	0.0555293	6357	20933	20617,19877,19317,226541,241035,27273,140489,19106,21419,12450,26427,14828,211329,13002,74041,234371,12954,19192,18537,13983,211064,18125,14200,109006,19122,74244,224105,19823,17248,17127,19060,66449,20479,12021,74268,12921,66897,110213,11835,12661,79202,74143,12385,11477,66505,12380,17300,14048,11608,21808,16403,22433,83946,74011,11800,17260,12389,114230,78304,15258,17128,14371,15525,233826,6777…	Snca,Rock1,Qk,Klhl20,Pkhd1,Pdk4,Bhlhe23,Eif2ak2,Tfap2b,Ccng1,Creb3l1,Hspa5,Ncoa7,Dnajc5,Ddias,Tmem161a,Cryaa,Psme3,Pcmt1,Esr2,Alkbh1,Nos1,Fhl2,Ciapin1,Prnp,Atg7,Pak2,Rnf7,Mdm4,Smad3,Ppp5c,Pam16,Vps4b,Bard1,Aven,Crhr1,Naa16,Tmbim6,Ar,Chl1,Tnfrsf22,Opa1,Ctnna1,Acvr1,Zmynd11,Cast,Foxc1,Eya1,Agtr1b,Tgfb2,Itga6,Xbp1,Phip,Slc25a27,Api5,Mef2c,Cav1,Aipl1,Naa38,Hipk2,Smad4,Fzd9,Hspa4,Palb2,Chd8,Pim3,Acaa2…
GO:0006082	organic acid metabolic process	6.73538e-06	-11.9081	818	306	0.0481359	6357	20933	107141,170718,108147,66590,64385,54375,26378,70456,56454,66514,57295,13614,104923,107869,229363,50787,71147,69906,109900,66945,20851,27364,52633,102294,18293,15450,107045,229211,58193,24088,67873,17257,14873,20524,13110,26874,72141,192170,54616,74121,231326,22229,20917,212898,68263,19016,226414,76898,19305,18597,17768,23874,12183,27267,14874,14719,67383,11364,17117,110446,70396,98314,58810,328780…	Cyp2c50,Idh3b,Atic,Farsa,Cyp4f14,Azin1,Decr2,Mpc2,Aldh18a1,Asrgl1,Icmt,Edn1,Adi1,Cth,Gmps,Hs6st3,Oxsm,Slc25a32,Asl,Sdha,Stat5b,Srr,Nit2,Cyp4v3,Ogdh,Lipc,Lars,Acad9,Extl2,Tlr2,Mri1,Mecp2,Gsto1,Slc25a17,Cyp2j6,Abcd2,Adpgk,Eif4a3,Extl3,Acoxl,Aasdh,Ucp3,Suclg2,Dse,Pdhb,Pparg,Dars,B3gat1,Pex5,Pdha1,Mthfd2,Farsb,Bpgm,Cars,Gstz1,Got2,Carnmt1,Acadm,Amacr,Acat1,Asnsd1,D2hgdh,Akr1a1,Prss34,Ext2,Mapk14,Pnpl…
GO:0061024	membrane organization	6.93256e-06	-11.8793	694	264	0.041529	6357	20933	74244,98732,11909,20391,15239,224020,230709,11983,214585,18457,20479,68942,58244,434246,93742,11933,74143,209462,107338,18441,236915,20617,19877,225608,215708,13383,382864,69276,56217,237542,12018,17274,84652,15277,67801,30056,71146,19400,242669,56418,19298,73122,20336,67952,234678,56224,235442,56398,226407,170762,83431,68581,228960,668212,19063,20910,76959,56016,67453,380664,14712,242557,12389,7…	Atg7,Rab3gap2,Atf2,Sgca,Hgs,Pi4ka,Zmpste24,Atpif1,Spg11,Bloc1s6,Vps4b,Chmp2b,Stx6,Trim72,Pard3,Atp1b3,Opa1,Hace1,Gbf1,P2ry1,Arhgef9,Snca,Rock1,Sh3tc2,Miga1,Dlg1,Colq,Sec62,Mpp5,Osbpl8,Bak1,Rab8a,Fam126a,Hk2,Pllp,Timm9,Golga7b,Rapsn,Azin2,Ykt6,Pex19,Tgfbrap1,Exoc4,Tomm20,D230025D16Rik,Tspan5,Rab8b,Chp1,Rab3gap1,Nup155,Ndel1,Tmed10,Stx16,Efr3b,Ppt1,Stxbp1,Chmp5,Hebp2,Slc25a46,Lemd3,Gnpat,Atg4c,Cav1…
GO:0051146	striated muscle cell differentiation	7.13161e-06	-11.851	194	88	0.013843	6357	20933	116904,75547,30963,18019,13405,18741,21916,59006,17295,108655,16653,72330,26556,20481,68802,18092,54720,12301,103806,22437,51810,22339,64082,17260,211323,19055,17691,50875,68794,69726,12390,15182,73739,319757,18007,68810,237500,20661,19091,11459,20541,12675,193385,218772,68016,22388,11364,74244,17258,21821,18021,15214,237560,16412,11477,17928,320502,11793,77579,26398,68927,22439,12175,69597,16691…	Alpk3,Akap13,Hacd1,Nfatc2,Dmd,Pitx2,Tmod1,Myoz2,Met,Foxp1,Kras,Klhl40,Homer1,Ski,Mypn,Nkx2-6,Rcan1,Cacybp,Maml1,Xirp1,Hnrnpu,Vegfa,Popdc2,Mef2c,Nrg1,Ppp3ca,Sik1,Tmod3,Flnc,Smyd3,Cav2,Hdac2,Cby1,Smo,Neo1,Nexn,Tmtc3,Sort1,Prkg1,Acta1,Slc8a1,Chuk,Fam65b,Rarb,Murc,Wdr1,Acadm,Atg7,Mef2a,Ift88,Nfatc3,Hey2,Lrrc10,Itgb1,Acvr1,Myog,Lmod3,Atg5,Myh10,Map2k4,Ptcd2,Xk,Bnip2,Afg3l2,Krt8,Cdon,Gpx1,Sox6,Ryr1,Bcl…
GO:0042692	muscle cell differentiation	7.20931e-06	-11.8401	270	116	0.0182476	6357	20933	54720,15078,68802,18092,26556,20481,11938,407831,108655,17295,16653,72330,59006,65256,56758,102423,30963,18741,18019,13405,21916,50501,16392,116904,99982,78688,75547,58522,20541,21380,109676,12675,193385,237500,20661,19091,11459,69726,18007,15182,12390,73739,319757,68810,50875,68794,19883,20586,19055,17691,17257,211323,17260,103806,22437,51810,22339,64082,243931,12301,239719,17928,320502,77579,11…	Rcan1,H3f3a,Mypn,Nkx2-6,Homer1,Ski,Atp2a2,Tmem204,Foxp1,Met,Kras,Klhl40,Myoz2,Asb2,Mbnl1,Hinfp,Hacd1,Pitx2,Nfatc2,Dmd,Tmod1,Prok2,Isl1,Alpk3,Kdm1a,Nol3,Akap13,Trim54,Slc8a1,Tbx1,Ank2,Chuk,Fam65b,Tmtc3,Sort1,Prkg1,Acta1,Smyd3,Neo1,Hdac2,Cav2,Cby1,Smo,Nexn,Tmod3,Flnc,Rora,Smarca4,Ppp3ca,Sik1,Mecp2,Nrg1,Mef2c,Maml1,Xirp1,Hnrnpu,Vegfa,Popdc2,Tshz3,Cacybp,Mkl2,Myog,Lmod3,Myh10,Atg5,Map2k4,Acvr1,Itgb1,…
GO:0051053	negative regulation of DNA metabolic process	7.27201e-06	-11.8315	116	58	0.0091238	6357	20933	22130,50755,218914,225160,12168,21809,98956,12053,12649,50754,72400,50505,74244,103677,17535,69237,22791,13347,235047,68968,57321,237107,11482,66131,66869,17350,15381,18016,17686,19016,21951,12190,16882,28113,57441,21749,19062,52463,51810,98496,431706,77782,17685,19252,117599,19356,236904,20779,74493,18294,22160,22596,17688,15574,72836,269400,27354,65113	Ttf1,Fbxo18,Wapl,Thoc1,Bmpr2,Tgfb3,Nat10,Bcl6,Chek1,Fbxw7,Pinx1,Ercc4,Atg7,Smg6,Mre11a,Gtpbp4,Dnajc2,Dffa,Zfp809,Cdan1,Terf2ip,Gnl3l,Acvrl1,Tipin,Zfp869,Mlh1,Hnrnpc,Nf2,Msh3,Pparg,Tnks,Brca2,Lig3,Tinf2,Gmnn,Terf1,Inpp5k,Tet1,Hnrnpu,Pid1,Zfp457,Polq,Msh2,Dusp1,Helb,Rad17,Klhl15,Src,Tnks2,Ogg1,Twist1,Xrcc5,Msh6,Hus1,Pot1b,Rtel1,Nbn,Ndfip1
GO:0007034	vacuolar transport	7.27692e-06	-11.8308	101	52	0.00817996	6357	20933	20615,20479,269338,68942,17101,74349,52120,15239,27681,70297,11852,22088,14339,67064,50873,76959,70160,230514,218441,230895,74018,71900,56208,68299,105513,53612,68505,271564,53611,68943,14186,78287,76273,100504663,27057,66700,16783,55943,12492,11736,20660,74718,73122,76742,28084,77573,231580,105841,65113,75964,20661,11765	Snapin,Vps4b,Vps39,Chmp2b,Lyst,Fam160a2,Hgsnat,Hgs,Snf8,Gcc2,Rhob,Tsg101,Aktip,Chmp1b,Park2,Chmp5,Vps36,Leprot,Zfyve16,Vps13d,Als2,Tmem106b,Becn1,Vps53,Chmp7,Vti1b,Vps51,Vps13a,Vti1a,Pink1,Fgfr4,Rbsn,Ndfip2,Atg14,Ncoa4,Chmp3,Lamp1,Stx8,Scarb2,Ankfy1,Sorl1,Snx16,Tgfbrap1,Snx27,Vps25,Vps33a,Gak,Dennd3,Ndfip1,Trappc8,Sort1,Ap1g1
GO:0070507	regulation of microtubule cytoskeleton organization	7.39308e-06	-11.815	139	67	0.0105396	6357	20933	19878,77744,74187,70235,12649,18571,18763,15185,228421,20460,328108,76959,67064,219114,66917,66700,219103,76499,12389,14544,26425,58522,235661,68729,16551,74392,11789,74019,15505,68942,18148,56327,20620,20479,13640,56471,17755,74256,16328,74201,63873,380842,330938,26419,108903,78798,17245,19735,212514,19822,70012,215351,241035,208177,20617,244329,68041,103573,70799,21749,66985,66140,214444,18472,…	Rock2,Bora,Katnb1,Poc1a,Chek1,Pdcd6ip,Pkd1,Hdac6,Kif18a,Stil,Fam179b,Chmp5,Chmp1b,Ska3,Chordc1,Chmp3,Cenpj,Clasp2,Cav1,Gda,Nubp1,Trim54,Dync1li1,Trim37,Kif11,Specc1l,Apc,Traf3ip1,Hsph1,Chmp2b,Npm1,Arl2,Plk2,Vps4b,Efna5,Stmn4,Map1b,Cyld,Cep250,Cep97,Trpv4,Stmnd1,Dixdc1,Mapk8,Tbcd,Eml4,Mdm1,Rgs2,Spice1,Rnf4,Cep85,Senp6,Pkhd1,Phldb2,Snca,Mcph1,Mid1ip1,Xpo1,Cep192,Terf1,Rassf7,Ska2,Cdk5rap2,Pafah1b1,…
GO:1905037	autophagosome organization	7.60488e-06	-11.7867	49	30	0.00471921	6357	20933	1.24217e+159	Rb1cc1,Emc6,Atg3,Atg4d,Trp53inp1,Gba,Atg4c,Atg16l2,Ubqln1,Atg16l1,Stx12,Atg13,Atg14,Psen1,Map1lc3a,Atg12,5330417C22Rik,Atg7,Wipi2,Atg2a,Wdr45b,Stx17,Wdr45,Map1lc3b,Trappc8,Pik3c2a,Becn1,Atg5,Rab23,Pik3c3
GO:0016050	vesicle organization	7.66008e-06	-11.7795	232	102	0.0160453	6357	20933	54525,67064,99371,229593,231834,110058,76959,26903,20910,18759,317717,216238,76561,69178,57257,19345,69150,225326,228960,12488,68581,209018,269338,20615,18571,235567,56491,13852,20333,66201,22178,55988,12390,20661,53604,66333,271457,15463,12490,89867,66629,78610,67511,84092,226422,232664,19344,56440,74732,67231,207352,12912,66700,117197,14339,67727,22088,67804,73178,107338,240756,54198,53612,7401…	Syt7,Chmp1b,Arfgef2,Golph3l,Snx8,Syt17,Chmp5,Dysf,Stxbp1,Prkci,Sec22a,Eea1,Snx7,Snx5,Vav3,Rab5c,Snx4,Pik3c3,Stx16,Cd2ap,Tmed10,Vps8,Vps39,Snapin,Pdcd6ip,Dnajc13,Vapb,Stx2,Sec22b,Vta1,Tyrp1,Snx12,Cav2,Sort1,Zpbp,Aqp11,Rab5a,Agfg1,Cd34,Sec16b,Golph3,Uvrag,Tmed9,Usp8,Rab29,Ccdc136,Rab5b,Snx1,Stx11,Tbc1d20,Sec23ip,Creb1,Chmp3,Bloc1s4,Aktip,Stx17,Tsg101,Snx2,Wasl,Gbf1,Klhl12,Snx3,Vti1b,Als2,Gosr1,Stx6…
GO:0009314	response to radiation	7.72941e-06	-11.7705	368	151	0.0237533	6357	20933	60530,50505,17380,230484,68539,67738,20319,69807,22632,18538,446101,12649,99982,68142,12530,107986,22061,15465,98415,20583,16653,20147,69076,14151,12952,12912,231724,209456,27103,74996,109019,17257,18294,114230,19355,58230,11785,108841,114714,13872,235559,52033,15499,235323,270627,13649,12753,12290,60599,108012,12955,12921,19016,77065,16159,14048,12369,12367,12925,71101,67068,319801,14775,22278,5…	Fignl1,Ercc4,Mme,Usp1,Tmem109,Ppid,Sfrp2,Trim32,Yy1,Pcna,Xrra1,Chek1,Kdm1a,Ino80,Cdc25a,Ddb2,Trp63,Hrh1,Nucks1,Snai2,Kras,Rs1,Triap1,Fech,Cry1,Creb1,Rad9b,Trp53bp2,Eif2ak4,Usp47,Nabp1,Mecp2,Ogg1,Aipl1,Rad1,Rnf8,Apbb1,Rdh13,Rad51c,Ercc3,Topbp1,Pbk,Hsf1,Usp28,Taf1,Egfr,Clock,Cacna1e,Trp53inp1,Ap1s2,Cryab,Crhr1,Pparg,Ints7,Il12a,Eya1,Casp7,Casp3,Crip1,Uvssa,Dynlrb1,Tigar,Gpx1,Usf1,Net1,H2afx,Wrn,Bak…
GO:0043085	positive regulation of catalytic activity	8.07107e-06	-11.7272	939	346	0.0544282	6357	20933	23988,56706,109905,64930,26416,17451,66725,23922,13645,56330,100504663,319801,26390,22427,14066,277360,68943,68041,271981,217463,19016,21951,228361,107607,13867,29809,18645,381293,72238,218397,70097,19735,12370,20846,22337,72149,13649,217201,381760,13982,14573,21676,14745,100503670,54401,11554,71435,26408,11502,69534,22038,100855,23938,69263,227753,11991,242202,545156,22339,19246,11818,100169,217…	Pin1,Ccnl1,Rap1a,Tsc1,Mapk14,Mos,Lrrk2,Jtb,Egf,Pdcd5,Atg14,Tigar,Mapkbp1,Wrn,F3,Prex1,Pink1,Mid1ip1,Tbck,Snx13,Pparg,Tnks,Ambra1,Nod1,Erbb3,Rabgap1l,Pfn2,Kif14,Tbc1d5,Rasa1,Sash1,Rgs2,Casp8,Stat1,Vdr,Strada,Egfr,Rundc1,Ssbp1,Esr1,Gdnf,Tead1,Lpar1,Rpl5,Ywhab,Adrb1,Arhgap21,Map3k5,Adam9,Avpi1,Plscr1,Tbc1d14,Map2k5,Rfc3,Gsn,Hnrnpd,Pde5a,Kalrn,Vegfa,Ptpn1,Apoh,Phactr4,Trib2,Serinc1,Klf4,Fgd4,Cct4,Pab…
GO:0006950	response to stress	8.33131e-06	-11.6955	2649	901	0.141734	6357	20933	110213,68339,72124,93742,76251,266632,78896,268390,74143,16159,11608,14048,338371,16399,18613,81702,226151,17127,18021,14825,74244,52231,19122,270627,14991,235047,50932,12261,434246,50776,12921,234729,218793,17165,72999,14828,12018,26427,77987,17084,13665,74041,234371,26564,66861,12850,15277,19362,226026,224794,71702,23894,11727,12925,66940,20617,104806,191578,20190,64136,16948,56349,17189,12491,…	Tmbim6,Ccdc88c,Seh1l,Pard3,Ercc6l2,Irak4,1500015O10Rik,Ahsa2,Opa1,Il12a,Agtr1b,Eya1,Endov,Itga2b,Pecam1,Ankrd17,Fam178a,Smad3,Nfatc3,Cxcl1,Atg7,Ankzf1,Prnp,Taf1,H2-M3,Zfp809,Mink1,C1qbp,Trim72,Polg2,Crhr1,Vac14,Ube2e2,Mapkapk5,Insig2,Hspa5,Bak1,Creb3l1,Ascc3,Ly86,Eif2s1,Ddias,Tmem161a,Ror2,Dnajc10,Coq7,Hk2,Rad51ap1,Smc5,Enpp4,Cdc5l,Gtf2h2,Ang,Crip1,Shisa5,Snca,Fancm,Helq,Ryr1,Sdf2l1,Lox,Net1,Mb,C…
GO:0031570	DNA integrity checkpoint	8.68701e-06	-11.6537	99	51	0.00802265	6357	20933	218294,80280,19891,12649,70681,20184,102423,28000,68067,12753,227331,11909,17535,66131,105377,381921,76454,12366,27223,77011,67941,77065,269582,22061,216965,225182,17246,226591,15270,234736,19355,231724,21974,17685,225131,19356,26416,235559,235323,15574,71702,59126,56190,27354,19090,12450,234664,72440,12905,208836,327762	Cdc14b,Cdk5rap3,Rpa2,Chek1,Fam175a,Uimc1,Hinfp,Prpf19,Mrnip,Clock,Gigyf2,Atf2,Mre11a,Tipin,Slf1,Taok2,Fbxo31,Casp2,Trp53bp1,Ticrr,Rps27l,Ints7,Clspn,Trp63,Taok1,Rbbp8,Mdm2,Tiprl,H2afx,Rfwd3,Rad1,Rad9b,Top2b,Msh2,Wac,Rad17,Mapk14,Topbp1,Usp28,Hus1,Cdc5l,Nek6,Rbm38,Nbn,Prkdc,Ccng1,Nae1,Rhno1,Cradd,Fanci,Dna2
GO:0009060	aerobic respiration	8.70461e-06	-11.6517	56	33	0.00519113	6357	20933	6.43847e+166	Sirt3,Cox20,Aco1,Uqcr10,Fh1,Dlst,Cat,Uqcrc1,Adsl,Pank2,Ogdh,Mdh2,Sdha,Mtfr1,Idh3g,Chchd5,Oxa1l,Sucla2,Aco2,Fxn,Uqcrc2,Dlat,Pdha1,Cox6a1,Cox6a2,Mdh1,Suclg2,Sdhc,Mettl17,Idh1,Pdhb,Idh3b,Idh3a
GO:1903364	positive regulation of cellular protein catabolic process	8.77549e-06	-11.6435	109	55	0.00865188	6357	20933	26374,106042,13132,22225,242960,50873,22433,12398,22218,52551,218215,17131,71999,217410,19684,93687,231600,50754,108705,20620,11983,23806,268291,30945,56812,21929,70620,59036,56085,14694,22350,270627,74244,19164,71492,66245,75841,170930,14083,56736,72345,53380,14265,56515,67664,70797,14629,14466,244667,17246,100494,211770,66725,53312,13645	Rfwd2,Prickle1,Dab2,Usp5,Fbxl5,Park2,Xbp1,Cbfa2t3,Sumo1,Sgta,Rnf144b,Smad7,Fbxo22,Trib2,Rdx,Csnk1a1,Chfr,Fbxw7,Pttg1ip,Plk2,Atpif1,Arih1,Rnf217,Rnf19a,Dnajb2,Tnfaip3,Ube2v2,Dact1,Ubqln1,Rack1,Ezr,Taf1,Atg7,Psen1,Bbs7,Hspbp1,Rnf139,Sumo2,Ptk2,Rnf14,Amer1,Psmd10,Fmr1,Rnf138,Rnf125,Ankib1,Gclc,Gba,Disc1,Mdm2,Zfand2a,Trib1,Lrrk2,Nub1,Egf
GO:0006405	RNA export from nucleus	9.11846e-06	-11.6052	63	36	0.00566305	6357	20933	1.70762e+200	Nup155,Npm1,Thoc1,Alkbh5,BC005561,Gle1,Nup214,Smg6,Fyttd1,Thoc3,Xpot,Thoc7,Srsf10,Sarnp,Nup85,Pabpn1,Ddx25,Ddx39,Thoc5,Zc3h3,Eny2,Nup153,Xpo5,Pom121,Nup188,Shfm1,Ddx19b,Ncbp1,Tsc1,Nxt1,Polr2d,Nup160,Nup107,Ddx19a,Pom121l2,Smg5
GO:0032386	regulation of intracellular transport	9.33303e-06	-11.582	492	194	0.0305175	6357	20933	13663,89867,17246,216274,231070,99237,67231,14369,241770,140483,230738,54194,14682,66578,319757,20660,76983,14265,20224,77574,271457,142980,50754,78688,18618,12177,21809,20430,56456,18708,235567,11735,13607,12985,269113,11938,18477,230514,54673,104015,56722,107829,13830,19335,22687,223642,328572,69150,103573,77116,57296,23892,28042,21812,71116,18760,20779,14634,320482,17957,109552,75841,108124,19…	Ei24,Sec16b,Mdm2,Cep290,Insig1,Tm9sf4,Tbc1d20,Fzd7,Rims4,Hnmt,Zc3h12a,Akap8l,Gnaq,Mis18a,Smo,Sorl1,Scfd1,Fmr1,Sar1a,Tcaf1,Rab5a,Tlr3,Fbxw7,Nol3,Pemt,Bnip3l,Tgfb3,Cyfip1,Actl6a,Pik3r1,Dnajc13,Ank3,Eda,Csf3,Nup54,Atp2a2,Prdx1,Leprot,Sh3glb1,Synj1,Litaf,Thoc5,Stom,Rab23,Zpr1,Zc3h3,Ep300,Snx4,Xpo1,Mtmr2,Psmd8,Grem1,Selenoi,Tgfbr1,Stx18,Prkd1,Src,Gli3,Nron,Napb,Sri,Rnf139,Napa,Npepps,Nupl1,Map2k1,U2af…
GO:0000045	autophagosome assembly	9.82439e-06	-11.5306	45	28	0.00440459	6357	20933	5.18971e+149	Atg13,Atg14,Atg12,Psen1,Atg7,5330417C22Rik,Map1lc3a,Ubqln1,Atg16l2,Atg16l1,Stx12,Trp53inp1,Atg4d,Atg4c,Rb1cc1,Emc6,Atg3,Atg5,Rab23,Pik3c3,Trappc8,Becn1,Wdr45,Map1lc3b,Wdr45b,Atg2a,Wipi2,Stx17
GO:0030258	lipid modification	9.99846e-06	-11.5131	153	72	0.0113261	6357	20933	219135,217480,56357,20975,77116,53332,114663,67916,66885,19062,12491,71910,104718,84652,67073,16331,26416,84095,15107,74302,11364,219024,227095,228368,110446,224020,19299,19305,83493,19016,110460,72519,233789,231086,26874,20524,74114,13177,23986,19012,74121,93747,18984,11992,69923,23827,52538,55980,11363,66841,71985,242291,229211,56690,19302,102294,18634,74769,170459,16329,105787,66948,19015,1870…	Mtmr6,Dgkb,Ivd,Synj2,Mtmr2,Mtmr1,Impa2,Plpp3,Acadsb,Inpp5k,Cd36,Plpp5,Ttc7b,Fam126a,Pi4k2b,Inpp5d,Mapk14,Pi4k2a,Hadh,Mtmr3,Acadm,Tmem55b,Hibch,Slc35c1,Acat1,Pi4ka,Abcd3,Pex5,Sacm1l,Pparg,Acat2,Tmem55a,Smg1,Hadhb,Abcd2,Slc25a17,Crot,Eci1,Eci2,Plpp1,Acoxl,Echs1,Por,Auh,Agk,Bpnt1,Acaa2,Impa1,Acadl,Etfdh,Acad10,Impad1,Acad9,Mlycd,Pex2,Cyp4v3,Pex7,Pik3cb,Stard4,Inpp1,Prkaa1,Acad8,Ppard,Pik3c2a,Efr3b,G…
GO:0009161	ribonucleoside monophosphate metabolic process	1.06651e-05	-11.4485	169	78	0.0122699	6357	20933	73694,53893,11977,72900,11674,66945,11516,11566,56428,18293,12867,17257,68055,14450,11946,17685,107197,11958,11951,68197,72141,66454,108147,56012,67059,67003,80914,75483,229363,18641,21871,66416,22247,11949,11966,22272,15277,12850,407785,74167,12858,13807,11564,12869,28080,50799,80752,66152,11964,20617,22273,26430,23959,11975,11637,56409,12862,67264,66052,433182,14923,12183,14297,18655,12861,6712…	Ndufaf7,Nudt5,Atp7a,Ndufv2,Aldoa,Sdha,Adcyap1,Adss,Mtch2,Ogdh,Cox7c,Mecp2,Atp5s,Gart,Atp5a1,Msh2,Uqcc3,Atp5k,Atp5g1,Ndufc2,Adpgk,Nmnat1,Atic,Pgam2,Ola1,Uqcrc2,Uck2,Cox8c,Gmps,Pfkl,Atp6v0a2,Ndufa7,Umps,Atp5c1,Atp6v1b2,Uqcrq,Hk2,Coq7,Ndufs6,Nudt9,Cox5a,Eno2,Adsl,Cox8b,Atp5o,Slc25a13,Fam20c,Uqcr10,Atp6v1a,Snca,Uqcrc1,Parg,Nt5e,Atp6v0a1,Ak2,Nudt3,Cox6a2,Ndufb8,Sdhc,Eno1b,Guk1,Bpgm,Fxn,Pgk1,Cox6a1,Atp…
GO:0090501	RNA phosphodiester bond hydrolysis	1.06951e-05	-11.4457	61	35	0.00550574	6357	20933	9.89854e+183	Clp1,Ncbp1,Exosc9,Edc3,Eri2,Eri3,Toe1,Cpsf2,Zc3h12a,Elac2,Rpp38,Rrs1,Lactb2,Abt1,Pop4,Fip1l1,Elac1,Wdr33,Pop7,Cpsf1,Exosc7,Nob1,Cstf3,Utp23,Pcf11,Mrpl44,Exosc3,Npm1,Rcl1,Bop1,Mov10,Exosc8,Eri1,Las1l,Bms1
GO:0060537	muscle tissue development	1.07024e-05	-11.445	322	134	0.0210791	6357	20933	56504,66354,13383,15213,57810,20190,14775,107589,74376,12292,14200,64930,26416,237611,14281,218772,17261,14225,228019,11364,12370,74244,18021,21808,237560,17300,14048,53318,17131,11477,17928,77579,11793,56771,243931,17128,239719,103806,22437,12389,22339,224640,17260,19055,380664,112405,15182,12162,68810,19091,11459,20541,217082,14236,193385,72900,116904,67451,75547,74182,16392,12168,72949,23967,2…	Srpk3,Snw1,Dlg1,Hey1,Cdon,Ryr1,Gpx1,Mylk,Myo18b,Cacna1s,Fhl2,Tsc1,Mapk14,Stac3,Fos,Rarb,Mef2d,Fkbp1a,Mettl8,Acadm,Casp8,Atg7,Nfatc3,Tgfb2,Lrrc10,Foxc1,Eya1,Pdlim3,Smad7,Acvr1,Myog,Myh10,Atg5,Med20,Tshz3,Smad4,Mkl2,Maml1,Xirp1,Cav1,Vegfa,Lemd2,Mef2c,Ppp3ca,Lemd3,Egln1,Hdac2,Bmp7,Nexn,Prkg1,Acta1,Slc8a1,Hlf,Foxn2,Fam65b,Ndufv2,Alpk3,Pkp2,Akap13,Gpcpd1,Isl1,Bmpr2,Ccnt2,Osr1,Xirp2,Klhl31,Foxp1,Met,Kl…
GO:0051640	organelle localization	1.08972e-05	-11.427	387	157	0.0246972	6357	20933	74117,268697,108907,97112,52906,353258,18472,50907,11736,56418,52563,64933,80718,67166,66725,71819,20617,17451,16561,13383,381293,384619,72124,77579,73689,93742,116837,381269,14048,107338,229524,50850,74006,59041,68942,94245,108012,171531,16570,20479,18457,214585,105782,24015,71435,17918,26425,94190,16211,54141,224640,380664,101994,13424,66713,67511,67139,74732,227801,71900,70385,217325,76959,209…	Actr3,Ccnb1,Nusap1,Nmd3,Ahi1,Ltv1,Pafah1b1,Preb,Ankfy1,Ykt6,Cdc23,Ap3m2,Rab27b,Arl8b,Lrrk2,Kif23,Snca,Mos,Kif1b,Dlg1,Kif14,Ccdc155,Seh1l,Myh10,Bloc1s2,Pard3,Rims1,Mreg,Eya1,Gbf1,Msto1,Spast,Dnm1l,Stk25,Chmp2b,Dtnbp1,Ap1s2,Mlph,Kif3c,Vps4b,Bloc1s6,Spg11,Scrib,Abce1,Arhgap21,Myo5a,Nubp1,Ophn1,Kpnb1,Spag5,Lemd2,Lemd3,Champ1,Dync1h1,Actr2,Tmed9,Mis12,Stx11,Dennd1a,Tmem106b,Spdl1,Llgl2,Chmp5,Stxbp1,Dy…
GO:0034599	cellular response to oxidative stress	1.14908e-05	-11.374	164	76	0.0119553	6357	20933	74041,234371,12850,19017,14281,109815,231207,11757,20655,228026,18760,20779,67067,66725,20617,12460,68943,69568,14158,14775,18174,56349,12491,93759,11865,22433,14297,26419,53382,101476,240442,11863,59041,15251,23992,19823,74244,66653,14088,60599,52521,14780,26408,11977,20541,15499,213272,14056,18779,15182,15368,11991,16210,12928,230738,56458,238505,56642,170826,11911,17527,170719,11792,11677,1193…	Ddias,Tmem161a,Coq7,Ppargc1a,Fos,Selenos,Cpeb2,Prdx3,Sod1,Pdk1,Prkd1,Src,Romo1,Lrrk2,Snca,Ccs,Pink1,Vkorc1l1,Fer,Gpx1,Slc11a2,Net1,Cd36,Sirt1,Arntl,Xbp1,Fxn,Mapk8,Txnl1,Plekha1,Adnp2,Arnt,Stk25,Hif1a,Prkra,Rnf7,Atg7,Brf2,Fancc,Trp53inp1,Zfp622,Gpx5,Map3k5,Atp7a,Slc8a1,Hsf1,Txndc2,Ezh2,Pla2r1,Hdac2,Hmox1,Hnrnpd,Impact,Crk,Zc3h12a,Foxo1,Mtr,Ankrd2,Ppargc1b,Atf4,Mpv17,Oxr1,Apex1,Akr1b3,Atp2a2,Cyp1b1…
GO:0035556	intracellular signal transduction	1.15984e-05	-11.3646	1260	451	0.0709454	6357	20933	98710,74194,56190,268480,207728,18711,68724,52589,11842,14169,16331,26416,102371,17920,238130,109905,241134,67166,26934,66626,80718,12367,13645,66725,76108,78757,54607,68943,277360,66354,17776,219140,19330,14775,26390,67844,76829,17131,12702,13867,11861,107607,58231,245269,19325,68328,215693,12458,13649,17993,59041,20846,73158,14569,16438,22156,68842,18176,21676,12554,228543,12955,17126,56297,152…	Rabif,Rnd3,Rbm38,Rapgefl1,Pde2a,Pikfyve,Arl8a,Ncald,Arf3,Fgf14,Inpp5d,Mapk14,Myzap,Myo6,Dock4,Rap1a,Nyap2,Arl8b,Racgap1,Cdip1,Rab27b,Casp3,Egf,Lrrk2,Rap2a,Rictor,Socs6,Pink1,Prex1,Snw1,Mast2,Spata13,Rab18,Gpx1,Mapkbp1,Rab32,Dok5,Smad7,Socs3,Erbb3,Arl4a,Nod1,Stk4,Nim1k,Rab10,Rab13,Zmat1,Ccr6,Egfr,Ndufs4,Stk25,Stat1,Larp1,Gdi2,Itpr1,Tuft1,Tulp4,Nras,Tead1,Cdh13,Rhov,Cryab,Smad2,Arl6,Hipk1,Map3k5,Ad…
GO:0043543	protein acylation	1.18957e-05	-11.3393	151	71	0.0111688	6357	20933	109115,75560,77853,15161,75565,13831,18519,93759,21761,12190,17928,66897,17692,66233,53627,269003,228019,270627,67773,73390,27878,73247,18108,217588,70088,71146,17448,140858,59001,19043,94092,13486,74763,225895,331623,70796,19042,56505,320150,75965,217031,107435,71777,226976,12914,57437,328572,228714,56292,217127,66979,56456,68268,24075,100683,74195,100043497,102162,11785,109900,28019,77805,18984…	Supt3,Ep400,Msl2,Hcfc1,Sgf29,Epc1,Kat2b,Sirt1,Morf4l1,Brca2,Myog,Naa16,Msl3,Dmap1,Porcn,Sap130,Mettl8,Taf1,Kat8,Msl3l2,Tada1,Mrgbp,Nmt2,Mbip,Meaf6,Golga7b,Mdh2,Wdr5,Pole3,Ppm1b,Trim16,Dr1,Naa60,Taf6l,Bend3,Zdhhc1,Ppm1a,Ruvbl1,Zdhhc17,Zdhhc20,Tada2a,Hat1,Ing3,Kansl3,Crebbp,Golga7,Ep300,Csrp2bp,Naa10,Kat7,Pole4,Actl6a,Zdhhc21,Taf10,Trrap,Elp3,Nat8f7,Taf5l,Apbb1,Asl,Ing4,Esco1,Por,Spi1,Mecp2,Yeats4,…
GO:0032436	positive regulation of proteasomal ubiquitin-dependent protein catabolic process	1.19027e-05	-11.3387	73	40	0.00629228	6357	20933	5.25512e+208	Sgta,Rnf144b,Smad7,Trib2,Fbxo22,Dab2,Rfwd2,Prickle1,Usp5,Park2,Cbfa2t3,Sumo1,Ube2v2,Ubqln1,Rack1,Bbs7,Atg7,Psen1,Taf1,Csnk1a1,Chfr,Dnajb2,Arih1,Rnf19a,Rnf217,Plk2,Psmd10,Rnf138,Rnf125,Hspbp1,Sumo2,Rnf14,Zfand2a,Trib1,Nub1,Lrrk2,Ankib1,Gclc,Gba,Mdm2
GO:1905269	positive regulation of chromatin organization	1.23831e-05	-11.2992	95	49	0.00770804	6357	20933	328572,73086,93759,22083,13626,67367,20587,14245,20583,18519,109331,22433,217031,24116,53890,231151,56399,16392,93765,99982,71175,12053,76246,17765,214669,69260,13433,26992,14265,268697,55982,18125,214855,80748,75302,319974,54194,66317,17257,16468,18760,74016,22339,52463,20874,17128,66354,71148,68943	Ep300,Rps6ka5,Sirt1,Ctr9,Eed,Paxbp1,Smarcb1,Lpin1,Snai2,Kat2b,Rnf20,Xbp1,Tada2a,Nelfa,Sart3,Tada2b,Akap8,Isl1,Ube2n,Kdm1a,Nipbl,Bcl6,Rtf1,Mtf2,L3mbtl2,Ing2,Dnmt1,Brd7,Fmr1,Ccnb1,Paxip1,Nos1,Arid5a,BC004004,Asxl2,Auts2,Akap8l,Wdr61,Mecp2,Jarid2,Prkd1,Phf19,Vegfa,Tet1,Slk,Smad4,Snw1,Mier1,Pink1
GO:0009267	cellular response to starvation	1.23946e-05	-11.2983	110	55	0.00865188	6357	20933	14466,27273,22427,19106,21847,56458,230738,66725,100504663,27368,252875,16210,27103,74302,12123,66148,27220,223453,52187,17341,68441,16476,14828,13666,13665,14645,64143,12421,105787,229722,74244,66734,74370,54170,11910,27053,69034,67443,54673,17168,22433,20788,71999,225326,72124,11793,108079,11911,93759,67579,56295,233833,56208,18704,71270	Gba,Pdk4,Wrn,Eif2ak2,Klf10,Foxo1,Zc3h12a,Lrrk2,Atg14,Tbl2,Mios,Impact,Eif2ak4,Mtmr3,Hrk,Dnajc15,Cartpt,Dap,Rragd,Bhlha15,Rraga,Jun,Hspa5,Eif2ak3,Eif2s1,Glul,Ralb,Rb1cc1,Prkaa1,5330417C22Rik,Atg7,Map1lc3a,Rptor,Rragc,Atf3,Asns,Nupr1l,Map1lc3b,Sh3glb1,Nprl3,Xbp1,Srebf2,Fbxo22,Pik3c3,Seh1l,Atg5,Prkaa2,Atf4,Sirt1,Cpeb4,Higd1a,Tnrc6a,Becn1,Pik3c2a,4933438K21Rik
GO:1901990	regulation of mitotic cell cycle phase transition	1.24466e-05	-11.2941	226	99	0.0155734	6357	20933	70601,66993,81702,12428,53317,105377,381293,52679,269582,19891,80280,30949,218793,12237,20479,53869,18761,72290,13649,235041,214498,15574,28036,108058,19192,268697,208836,12905,27354,56190,234664,224023,12450,105837,18712,52206,70799,108000,21749,52563,14841,12566,19356,15468,319195,69754,11491,83560,76454,12366,18767,77011,22061,20460,17120,19684,68142,11792,67941,107047,12914,19363,26951,12649,…	Ecd,Smarcd3,Ankrd17,Ccna2,Plrg1,Slf1,Kif14,E2f7,Clspn,Rpa2,Cdk5rap3,Lcmt1,Ube2e2,Bub3,Vps4b,Rab11a,Prkcq,Lsm11,Egfr,Kank2,Cdc73,Hus1,Larp7,Camk2d,Psme3,Ccnb1,Fanci,Cradd,Nbn,Rbm38,Nae1,Klhl22,Ccng1,Mtbp,Pim1,Anapc4,Cep192,Cenpf,Terf1,Cdc23,Gsg2,Cdk2,Rad17,Prmt2,Rpl17,Fbxo7,Adam17,Tex14,Fbxo31,Casp2,Pkia,Ticrr,Trp63,Stil,Mad1l1,Rdx,Ino80,Apex1,Rps27l,Psmg2,Crebbp,Rad51b,Zw10,Chek1,Mad2l1,Csnk2a2,P…
GO:0042594	response to starvation	1.31215e-05	-11.2413	128	62	0.00975303	6357	20933	74370,54170,11364,11910,237253,66734,229722,74244,64143,12421,105787,192197,229317,11911,93759,233833,67579,56295,72238,56208,71270,18704,71999,225326,72124,11793,108079,17168,22433,20788,69034,27053,67443,29869,54673,27368,252875,16210,27103,56458,230738,66725,100504663,19106,21847,22427,14466,27273,209354,13666,14645,13665,68441,14828,16476,17341,52187,74302,12123,66148,223453,27220	Rptor,Rragc,Acadm,Atf3,Lrp11,Map1lc3a,5330417C22Rik,Atg7,Ralb,Rb1cc1,Prkaa1,Bcas3,Eif2a,Atf4,Sirt1,Tnrc6a,Cpeb4,Higd1a,Tbc1d5,Becn1,4933438K21Rik,Pik3c2a,Fbxo22,Pik3c3,Seh1l,Atg5,Prkaa2,Nprl3,Xbp1,Srebf2,Nupr1l,Asns,Map1lc3b,Ulk2,Sh3glb1,Tbl2,Mios,Impact,Eif2ak4,Foxo1,Zc3h12a,Lrrk2,Atg14,Eif2ak2,Klf10,Wrn,Gba,Pdk4,Eif2b1,Eif2ak3,Glul,Eif2s1,Rraga,Hspa5,Jun,Bhlha15,Rragd,Mtmr3,Hrk,Dnajc15,Dap,Cart…
GO:0055002	striated muscle cell development	1.31215e-05	-11.2413	128	62	0.00975303	6357	20933	69597,16691,103806,22437,22339,64082,14775,20190,51810,22439,68927,50876,19055,74376,12390,319757,15182,108058,69726,68810,12292,50875,68794,14200,24051,237611,20541,56376,193385,228003,17996,237500,11459,11790,19091,68016,116904,17258,59006,74244,18021,22388,21916,18741,18019,13405,26556,20481,16412,15214,108655,17295,237560,72330,17928,320502,54720,26398,11793,77579,18092,68802	Afg3l2,Krt8,Maml1,Xirp1,Vegfa,Popdc2,Gpx1,Ryr1,Hnrnpu,Xk,Ptcd2,Tmod2,Ppp3ca,Myo18b,Cav2,Smo,Hdac2,Camk2d,Smyd3,Nexn,Cacna1s,Tmod3,Flnc,Fhl2,Sgcb,Stac3,Slc8a1,Pdlim5,Fam65b,Klhl41,Neb,Tmtc3,Acta1,Speg,Prkg1,Murc,Alpk3,Mef2a,Myoz2,Atg7,Nfatc3,Wdr1,Tmod1,Pitx2,Nfatc2,Dmd,Homer1,Ski,Itgb1,Hey2,Foxp1,Met,Lrrc10,Klhl40,Myog,Lmod3,Rcan1,Map2k4,Atg5,Myh10,Nkx2-6,Mypn
GO:0046034	ATP metabolic process	1.34409e-05	-11.2172	141	67	0.0105396	6357	20933	22273,20617,11964,66152,80752,11637,11975,26430,12858,13807,407785,15277,12850,28080,50799,12869,18746,230163,66218,14751,68550,18648,67273,13382,12064,11717,433182,14923,67264,66052,12862,12868,67126,12861,14297,18655,12183,11946,17685,107197,68055,17257,12867,72141,66454,68197,11958,11951,66945,72900,11977,11674,73694,53893,56428,18293,11516,11949,21871,66416,18641,22272,11966,67059,56012,75483…	Uqcrc1,Snca,Atp6v1a,Uqcr10,Fam20c,Ak2,Atp6v0a1,Parg,Cox5a,Eno2,Ndufs6,Hk2,Coq7,Atp5o,Slc25a13,Cox8b,Pkm,Aldob,Ndufb9,Gpi1,Tefm,Pgam1,Ndufa10,Dld,Bdnf,Ampd3,Eno1b,Guk1,Ndufb8,Sdhc,Cox6a2,Cox8a,Atp5e,Cox6a1,Fxn,Pgk1,Bpgm,Atp5a1,Msh2,Uqcc3,Atp5s,Mecp2,Cox7c,Adpgk,Nmnat1,Ndufc2,Atp5k,Atp5g1,Sdha,Ndufv2,Atp7a,Aldoa,Ndufaf7,Nudt5,Mtch2,Ogdh,Adcyap1,Atp5c1,Atp6v0a2,Ndufa7,Pfkl,Uqcrq,Atp6v1b2,Ola1,Pgam2,…
GO:0032543	mitochondrial translation	1.34961e-05	-11.2131	50	30	0.00471921	6357	20933	6.85657e+157	Mrps18a,Mterf3,Mrpl58,Chchd1,Mtif2,Gfm2,Ptcd3,Rars2,Tsfm,Mrps25,Mtif3,Mrps16,Noa1,Mrps2,Mrpl23,Gfm1,Mrpl44,Mtrf1,Mrps15,Mtrf1l,Mrpl10,Tars2,Mrpl16,Mrps11,Gatb,Ndufa7,Mterf4,Yars2,Lars2,Mrps17
GO:0031023	microtubule organizing center organization	1.3807e-05	-11.1903	83	44	0.0069215	6357	20933	70297,19878,71909,102774,72515,17931,230376,83431,192197,66296,56327,72415,18148,259279,74470,20460,57434,20501,16328,12190,67771,225745,381644,13197,216543,219072,12566,73738,76499,12175,219103,72776,78610,233276,70799,16551,99100,75786,18472,338349,214444,216848,99167,16568	Gcc2,Rock2,Haus5,Bbs4,Wdr43,Ppp1r12a,Haus6,Ndel1,Bcas3,Haus2,Arl2,Sgol1,Npm1,Tubgcp3,Cep72,Stil,Xrcc2,Slc16a1,Cep250,Brca2,Arpc5,Haus1,Cep135,Gadd45a,Cep68,Haus4,Cdk2,Haus7,Clasp2,Bnip2,Cenpj,Sass6,Uvrag,Tubgcp5,Cep192,Kif11,Cep152,Ckap5,Pafah1b1,Cntln,Cdk5rap2,Chd3,Ssx2ip,Kif3a
GO:0032984	macromolecular complex disassembly	1.41109e-05	-11.1686	71	39	0.00613497	6357	20933	2.11324e+207	Nrg1,Hbs1l,Cebpg,Smarca4,Tfip11,Kif18b,Gspt1,Mtrf1,Mtif3,Kif24,Abce1,Kif2c,Gak,Stmn1,Gfm2,Napb,Smn1,Smarcc1,Mrpl58,Napa,Arid1a,Kif5b,Smarce1,Wdr1,Vps4a,Mical2,Eif2d,Dstn,Mical3,Vps4b,Mtrf1l,Hdac6,Kif18a,Kif14,Stmn4,Smarcd3,Denr,Synj1,Smarcb1
GO:0009792	embryo development ending in birth or egg hatching	1.48225e-05	-11.1194	715	269	0.0423156	6357	20933	211064,12850,26564,26413,21679,244058,218490,240641,11695,13383,270685,13804,12946,21808,27494,381695,20587,14048,17300,71876,11835,18194,74143,11477,67888,50776,78912,330409,19089,17127,26987,112405,15499,50523,18541,105782,67772,20541,74778,17128,243931,239719,66055,233826,17260,209456,269275,544696,13132,108655,56470,242585,18092,13445,14368,217325,99982,13855,12649,83431,16410,11480,11487,239…	Alkbh1,Coq7,Ror2,Mapk1,Tead4,Rgma,Btf3,Kif20b,Alx4,Dlg1,Mthfd1l,Endog,Cr1l,Tgfb2,Amot,N4bp2l2,Smarcb1,Eya1,Foxc1,Cenpu,Ar,Nsdhl,Opa1,Acvr1,Tmem100,Polg2,Sp2,Cecr2,Prkcsh,Smad3,Eif4e2,Egln1,Hsf1,Lats2,Pcnt,Scrib,Chd8,Slc8a1,Rrp7a,Smad4,Tshz3,Mkl2,Sf3b6,Palb2,Mef2c,Trp53bp2,Acvr1c,Tbc1d32,Dab2,Foxp1,Rgs19,Slc35d1,Nkx2-6,Cdk2ap1,Fzd6,Llgl2,Kdm1a,Epn2,Chek1,Ndel1,Itgav,Acvr2a,Adam10,Osr1,Dad1,Hinfp,A…
GO:0031648	protein destabilization	1.53637e-05	-11.0835	37	24	0.00377537	6357	20933	6.78191e+126	Derl1,Fbxo4,Sirt1,Ccdc88c,Commd1,Isoc2a,Prkdc,Park2,Rnf139,Cdc73,Xbp1,Siah1a,Pex2,Mylip,Src,Gsn,Snca,Fbxw7,Fbxw11,Btrc,Chfr,Trim21,Mdm2,Npm1
GO:0051098	regulation of binding	1.54317e-05	-11.0791	324	134	0.0210791	6357	20933	11538,17191,16600,98415,67819,208727,22218,13132,72400,59036,16401,18763,16392,23802,20615,99982,93687,19719,97165,15257,15259,15182,72278,56347,13017,15499,22038,20586,19055,12313,15368,17260,12389,15258,17128,15525,192170,21951,110213,16341,18441,21808,232560,58231,14339,270627,17127,18028,17126,16976,94245,14225,22032,12018,244058,13592,209354,23988,68010,13665,21898,15387,19298,54723,83560,66…	Adnp,Mbd2,Klf4,Nucks1,Derl1,Hdac4,Sumo1,Dab2,Pinx1,Dact1,Itga4,Pkd1,Isl1,Amfr,Snapin,Kdm1a,Csnk1a1,Rfng,Hmgb2,Hipk1,Hipk3,Hdac2,Ccpg1,Eif3c,Ctbp2,Hsf1,Plscr1,Smarca4,Ppp3ca,Calm1,Hmox1,Mef2c,Cav1,Hipk2,Smad4,Hspa4,Eif4a3,Tnks,Tmbim6,Eif3e,P2ry1,Tgfb2,Caprin2,Stk4,Aktip,Taf1,Smad3,Nfib,Smad2,Lrpap1,Dtnbp1,Fkbp1a,Traf4,Bak1,Rgma,Ebf2,Eif2b1,Pin1,Bambi,Eif2s1,Tlr4,Hnrnpk,Pex19,Tfip11,Tex14,Lrrk2,Egf…
GO:0016239	positive regulation of macroautophagy	1.55407e-05	-11.0721	48	29	0.0045619	6357	20933	1.44661e+150	Gba,Atpif1,Bnip3l,Ralb,Ripk2,Rab3gap1,Pink1,Trim13,Atg7,Clec16a,Larp1,5330417C22Rik,Hif1a,Tlr2,Rab3gap2,Wac,Hmox1,Sptlc1,Tsc1,Pafah1b2,Scoc,Sh3glb1,Epm2a,Supt5,Fyco1,Hk2,Sirt1,Nod1,Becn1
GO:0051310	metaphase plate congression	1.55407e-05	-11.0721	48	29	0.0045619	6357	20933	1.01995e+153	Champ1,Pinx1,Vps4a,Ndc80,Cdc23,Cenpf,Rab11a,Kif22,Kif18a,Vps4b,Chmp2b,Mis12,Brca2,Kpnb1,Cenpc1,Zw10,Kif2c,Seh1l,Spdl1,Mad1l1,Chmp7,Kif14,Ccnb1,Becn1,Mlh1,Chmp5,Rrs1,Chmp1b,Spice1
GO:0044770	cell cycle phase transition	1.56567e-05	-11.0646	126	61	0.00959572	6357	20933	217232,67655,12649,56399,20620,21987,69581,319651,12314,18795,50850,12447,102423,12428,78832,12532,17420,72508,16412,66131,72391,225182,50496,105513,77035,52679,11477,12530,66197,228714,22687,12236,67121,59046,76499,68193,13559,12580,244879,12566,12313,54394,54194,12545,448987,19055,21853,11789,24075,13684,67974,12315,12323,50523,108058,211134,319944,15904,70891,12013,100088	Cdc27,Ctdp1,Chek1,Akap8,Plk2,Tpd52l1,Rhou,Usp37,Calm2,Plcb1,Spast,Ccne1,Hinfp,Ccna2,Cacul1,Cdc25c,Mnat1,Rps6kb1,Itgb1,Tipin,Cdkn3,Rbbp8,E2f6,Chmp7,Kdm8,E2f7,Acvr1,Cdc25a,Cks2,Csrp2bp,Zpr1,Bub1b,Mastl,Arpp19,Clasp2,Rpl24,E2f5,Cdkn2c,Npat,Cdk2,Calm1,Crlf3,Akap8l,Cdc7,Fbxl7,Ppp3ca,Timeless,Apc,Taf10,Eif4e,Ccny,Calm3,Camk2b,Lats2,Camk2d,Lzts1,Taf2,Id4,Spdya,Bach1,Rcc1
GO:0051656	establishment of organelle localization	1.60892e-05	-11.0374	313	130	0.0204499	6357	20933	105782,24015,71435,17918,16211,94190,54141,224640,380664,101994,13424,67139,66713,67511,74732,227801,70385,217325,76959,20910,16401,16573,67052,17828,22350,72515,72400,22631,235180,83431,68581,226407,56426,20615,74117,268697,97112,108907,52906,353258,18472,50907,56418,52563,64933,80718,66725,71819,20617,17451,16561,13383,381293,384619,72124,77579,73689,116837,381269,14048,107338,50850,59041,68942…	Scrib,Abce1,Arhgap21,Myo5a,Kpnb1,Ophn1,Spag5,Lemd2,Lemd3,Champ1,Dync1h1,Mis12,Actr2,Tmed9,Stx11,Dennd1a,Spdl1,Llgl2,Chmp5,Stxbp1,Itga4,Kif5b,Ndc80,Bloc1s5,Ezr,Wdr43,Pinx1,Ywhaz,Fez1,Ndel1,Tmed10,Rab3gap1,Pdcd10,Snapin,Actr3,Ccnb1,Nmd3,Nusap1,Ahi1,Ltv1,Pafah1b1,Preb,Ykt6,Cdc23,Ap3m2,Rab27b,Lrrk2,Kif23,Snca,Mos,Kif1b,Dlg1,Kif14,Ccdc155,Seh1l,Myh10,Bloc1s2,Rims1,Mreg,Eya1,Gbf1,Spast,Stk25,Chmp2b,Ap1…
GO:0007264	small GTPase mediated signal transduction	1.60892e-05	-11.0374	313	130	0.0204499	6357	20933	69159,319899,228543,18176,17165,12554,69721,14569,75869,19325,68328,236915,18613,11861,75423,67844,19330,20166,76108,14567,19877,66725,67166,80718,20818,238130,109905,330914,68724,11842,268480,81003,320292,68939,227377,17274,98710,74194,69581,228850,12053,219144,217378,56044,235442,16653,100169,19345,224624,329165,545156,226422,240168,215449,15368,11841,232441,235323,16211,234353,67286,11843,1155…	Rhebl1,Dock6,Rhov,Nras,Mapkapk5,Cdh13,Nkiras1,Gdi2,Arl5b,Rab10,Rab13,Arhgef9,Pecam1,Arl4a,Arl5a,Rab32,Rab18,Rtkn,Rap2a,Gdi1,Rock1,Lrrk2,Arl8b,Rab27b,Srprb,Dock4,Rap1a,Arhgap32,Arl8a,Arf3,Rapgefl1,Trim23,Rasgef1b,Rasl11b,Farp2,Rab8a,Rabif,Rnd3,Rhou,Ralgapb,Bcl6,Arl11,Dnajc27,Rala,Rab8b,Kras,Phactr4,Rab5c,Rab40c,Abi2,Kalrn,Rab29,Rasgrp3,Rap1b,Hmox1,Arf2,Rerg,Usp28,Kpnb1,Psd3,Ift22,Arf4,Adrb1,Arhgap…
GO:0019693	ribose phosphate metabolic process	1.62496e-05	-11.0274	274	116	0.0182476	6357	20933	66945,11674,11977,72900,53893,73694,74637,18293,56428,66588,11566,100198,11516,54598,110208,107197,66812,19883,17685,11946,14450,74114,68055,17257,75686,12867,68197,66454,72141,14916,242202,18605,11951,15357,11958,67059,56012,108147,268566,75483,80914,18950,67003,106564,11949,22247,66416,21871,51797,18641,229363,22272,67464,21881,11966,13807,74167,12858,407785,15277,23971,12850,50799,28080,12869,…	Sdha,Aldoa,Atp7a,Ndufv2,Nudt5,Ndufaf7,Shpk,Ogdh,Mtch2,Cmpk1,Adss,H6pd,Adcyap1,Calcrl,Pgd,Uqcc3,Ppcdc,Rora,Msh2,Atp5a1,Gart,Crot,Atp5s,Mecp2,Nudt16,Cox7c,Ndufc2,Nmnat1,Adpgk,Guca2b,Pde5a,Enpp1,Atp5g1,Hmgcr,Atp5k,Ola1,Pgam2,Atic,Gphn,Cox8c,Uck2,Pnp,Uqcrc2,Ppcs,Atp5c1,Umps,Ndufa7,Atp6v0a2,Ctps,Pfkl,Gmps,Uqcrq,Entpd4,Tkt,Atp6v1b2,Eno2,Nudt9,Cox5a,Ndufs6,Hk2,Papss1,Coq7,Slc25a13,Atp5o,Cox8b,Pank2,Adsl…
GO:1901800	positive regulation of proteasomal protein catabolic process	1.64522e-05	-11.0151	81	43	0.0067642	6357	20933	56736,66245,170930,67664,53380,56515,14265,14466,17246,70797,14629,211770,66725,53312,100494,12398,22218,13132,26374,106042,22433,50873,22225,217410,71999,52551,218215,17131,268291,23806,30945,56812,20620,93687,231600,50754,71492,270627,74244,19164,70620,56085,14694	Rnf14,Hspbp1,Sumo2,Rnf125,Psmd10,Rnf138,Fmr1,Gba,Mdm2,Ankib1,Gclc,Trib1,Lrrk2,Nub1,Zfand2a,Cbfa2t3,Sumo1,Dab2,Rfwd2,Prickle1,Xbp1,Park2,Usp5,Trib2,Fbxo22,Sgta,Rnf144b,Smad7,Rnf217,Arih1,Rnf19a,Dnajb2,Plk2,Csnk1a1,Chfr,Fbxw7,Bbs7,Taf1,Atg7,Psen1,Ube2v2,Ubqln1,Rack1
GO:0009144	purine nucleoside triphosphate metabolic process	1.64702e-05	-11.014	168	77	0.0121126	6357	20933	28080,50799,12869,12858,13807,407785,15277,12850,11637,11975,26430,22273,20617,11964,66725,66152,80752,12868,12861,67126,14297,18655,12183,433182,17434,14923,16434,67264,66052,12862,56045,18102,18648,13382,67273,12064,11717,18746,230163,66218,14751,68550,18293,56428,11516,66945,72900,11977,11674,27369,73694,53893,66454,68197,72141,11958,11951,11946,17685,107197,11534,68055,17257,12867,75686,26856…	Atp5o,Slc25a13,Cox8b,Cox5a,Eno2,Ndufs6,Hk2,Coq7,Ak2,Atp6v0a1,Parg,Uqcrc1,Snca,Atp6v1a,Lrrk2,Uqcr10,Fam20c,Cox8a,Cox6a1,Atp5e,Fxn,Pgk1,Bpgm,Eno1b,Mocs2,Guk1,Itpa,Ndufb8,Sdhc,Cox6a2,Samhd1,Nme1,Pgam1,Dld,Ndufa10,Bdnf,Ampd3,Pkm,Aldob,Ndufb9,Gpi1,Tefm,Ogdh,Mtch2,Adcyap1,Sdha,Ndufv2,Atp7a,Aldoa,Dguok,Ndufaf7,Nudt5,Nmnat1,Ndufc2,Adpgk,Atp5k,Atp5g1,Atp5a1,Msh2,Uqcc3,Adk,Atp5s,Mecp2,Cox7c,Nudt16,Gphn,Cox…
GO:0006891	intra-Golgi vesicle-mediated transport	1.68525e-05	-10.991	35	23	0.00361806	6357	20933	6.75425e+119	Cog6,Vti1a,Gosr1,Rab33b,Cog5,Nsf,Cog3,Copb1,Rab6b,Golga5,Gcc2,Dnajc28,Trappc10,Golga4,Copg2,Golga1,Sorl1,Gcc1,Sys1,Vti1b,Cog2,Rab6a,Copb2
GO:2000756	regulation of peptidyl-lysine acetylation	1.71312e-05	-10.9746	55	32	0.00503382	6357	20933	2.05872e+166	Smarcb1,Snai2,Kat2b,Hdac1,Tada2a,Ep300,Atg5,Eid1,Sirt1,Rps6ka5,Zfp451,Isl1,Chek1,L3mbtl2,Atg7,Tada2b,Nos1,Hdac2,Paxip1,Auts2,Arid5a,Brd7,Taf7,Gata2,Ctcf,Spi1,Smad4,Sirt3,Snca,Iws1,Mecp2,Twist1
GO:0033047	regulation of mitotic sister chromatid segregation	1.71312e-05	-10.9746	55	32	0.00503382	6357	20933	6.70521e+170	Ndc80,Espl1,Bub1,H2afy,Mad2l1,Cdc27,Lcmt1,Bub3,Csnk2a2,Stil,Mad1l1,Becn1,Zw10,Tnks,Psmg2,Fam178a,Slf1,Usp44,Cdc23,Tex14,Bub1b,Mtbp,Terf1,Ttk,Cep192,Anapc4,Ccnb1,Klhl22,Dync1li1,Nek6,Apc,Smc5
GO:0032968	positive regulation of transcription elongation from RNA polymerase II promoter	1.73935e-05	-10.9594	19	15	0.0023596	6357	20933	1.31322e+78	Dab2,Cdc73,Rtf1,Ell2,Eloc,Gtf2f2,Gtf2f1,Cbx7,Ctr9,Map2k1,Supt6,Leo1,Supt16,Eapp,Wdr61
GO:0006413	translational initiation	1.74087e-05	-10.9585	62	35	0.00550574	6357	20933	1.36652e+182	Eif2s1,Abce1,Mtif3,Eif2b1,Eif2b3,Eif3l,Eif2b2,Eif4e,Eif4e2,Mtif2,Eif3c,Eif3h,Eif2b5,Eif1ax,Yae1d1,Eif4h,Eif1,Eif2b4,Pcbp2,Eif4a2,Eif3e,Mcts2,Eif2a,Eif4b,Ssb,Denr,Eif5,Eif4g2,Larp1,Eif2s2,Eif2s3x,Eif4g3,Eif3a,Eif2d,Eif3m
GO:1901987	regulation of cell cycle phase transition	1.75599e-05	-10.9499	244	105	0.0165172	6357	20933	237877,12545,74996,327799,27214,17246,22137,69068,98496,12236,234736,229776,26992,19090,235661,114714,13872,235559,14056,55982,11789,59126,50875,12235,72611,20913,227331,68067,18795,59036,238271,30963,17535,67052,74370,13000,18763,12649,56150,107047,11792,67941,68142,19684,26951,12914,19363,22061,17120,20460,12366,76454,77011,18767,11491,17451,83560,319195,15468,69754,14841,12566,52563,19356,1871…	Atad5,Cdc7,Usp47,Usp44,Dbf4,Mdm2,Ttk,1810011O10Rik,Pid1,Bub1b,Rfwd3,Cdc14a,Brd7,Prkdc,Dync1li1,Rad51c,Ercc3,Topbp1,Ezh2,Paxip1,Apc,Nek6,Tmod3,Bub1,Zfp655,Stxbp4,Gigyf2,Mrnip,Plcb1,Dact1,Kcnh5,Hacd1,Mre11a,Ndc80,Rptor,Csnk2a2,Pkd1,Chek1,Mad2l1,Psmg2,Apex1,Rps27l,Ino80,Rdx,Zw10,Crebbp,Rad51b,Trp63,Mad1l1,Stil,Casp2,Fbxo31,Ticrr,Pkia,Adam17,Mos,Tex14,Rpl17,Prmt2,Fbxo7,Gsg2,Cdk2,Cdc23,Rad17,Pim1,Terf…
GO:0008033	tRNA processing	1.76952e-05	-10.9422	106	53	0.00833727	6357	20933	68205,76357,28088,98985,69606,100929,70153,14911,68916,67676,68626,72181,104721,382137,66637,52575,66161,66966,209584,66628,72026,69955,69786,227522,74097,13434,114615,20823,68045,72085,74753,231413,72167,67667,98956,233802,17299,73681,66663,67053,66369,271842,72133,108943,78890,74467,68736,381802,212728,70047,68291,208366,78651	Urm1,Trmt5,Rtcb,Clp1,Mtfmt,Tyw1,2210016F16Rik,Thumpd3,Cdkal1,Rpp21,Elac2,Nsun4,Ddx1,Fdxacb1,Tsen15,Trmt10c,Pop4,Trit1,Tyw3,Thg1l,Trmu,Fars2,Tprkb,Rpp38,Pop7,Trdmt1,Elac1,Ssb,2700060E02Rik,Osgepl1,Trmo,Grsf1,Thumpd2,Alkbh8,Nat10,Thumpd1,Mettl1,Trmt11,Uba5,Rpp14,Dus2,Rpusd2,Trub1,Trmt10a,Trmt44,Pus10,Tyw5,Tsen2,Tarbp1,Trnt1,Mto1,Rpp40,Lsm6
GO:0010608	posttranscriptional regulation of gene expression	1.82288e-05	-10.9125	413	165	0.0259556	6357	20933	16589,234594,229317,11792,72162,72322,14359,14151,227331,68036,14694,74412,56046,100037258,230861,387225,53872,210529,217351,56403,13684,236511,433702,80913,13418,26987,56347,387201,27103,11991,24127,75388,19055,70207,192170,52846,22339,12389,15467,68966,16341,30959,67579,192160,65967,233033,19735,15381,225929,232560,52575,29806,13649,17454,104625,103677,232164,14573,17165,13982,12261,75420,31981…	Uhmk1,Cnot1,Eif2a,Apex1,Dhx36,Xpo5,Fxr1,Fech,Gigyf2,Zfp706,Rack1,Gle1,Uqcc1,Dnajc3,Eif4g3,Mir30a,Caprin1,Mettl14,Tnrc6c,Syncrip,Eif4e,Ago1,Ncbp1,Pum2,Dnajc1,Eif4e2,Eif3c,Mir205,Eif2ak4,Hnrnpd,Xrn1,Boll,Ppp3ca,Taco1,Eif4a3,Cnot11,Vegfa,Cav1,Eif2ak1,Ngdn,Eif3e,Ddx25,Cpeb4,Casc3,Eefsec,Samd4b,Rgs2,Hnrnpc,Patl1,Caprin2,Trmt10c,Limd1,Egfr,Mov10,Cnot6,Smg6,Paip2b,Gdnf,Mapkapk5,Esr1,C1qbp,Secisbp2,Rc3h2…
GO:0007179	transforming growth factor beta receptor signaling pathway	1.83416e-05	-10.9063	74	40	0.00629228	6357	20933	2.68978e+203	Ltbp1,Tab1,Ptk2,Usp15,Cited2,Fos,Jun,Fut8,Bambi,Adam9,Col1a2,Smad4,Hipk2,Tgfbr2,Cdh5,Map3k7,Creb1,Acvr1c,Src,Gcnt2,Tgfbr1,Itgb1,Acvrl1,Tgfb2,Smad9,Tgfbr3,Bmp8a,Smad7,Acvr1,Smad2,Nlk,Ltbp4,Tgfb3,Bmpr1b,Zfyve9,Gdnf,Dcp1a,Mstn,Smad3,Usp9x
GO:0043009	chordate embryonic development	1.85225e-05	-10.8965	708	266	0.0418436	6357	20933	22034,14531,56417,76246,71175,21814,73916,15530,52679,17979,12006,22083,16870,14674,17158,15402,14634,328365,20679,319583,12808,16691,56449,14461,27354,14013,20115,16598,93760,14388,102774,19164,56758,106947,380993,22687,11518,19335,19363,15407,328572,107829,380614,21384,30928,19672,50768,65100,240725,106042,26409,232791,11819,13813,22160,12981,108098,21380,68146,20683,79464,74019,28088,20602,108…	Traf6,Gcm1,Adar,Rtf1,Nipbl,Tgfbr3,Ift57,Hspg2,E2f7,Ncoa3,Axin2,Ctr9,Lhx2,Gna13,Man2a1,Hoxa5,Gli3,Zmiz1,Sox6,Lig4,Cobl,Krt8,Ybx3,Gata2,Nbn,Mecom,Rps7,Klf2,Arid1a,Gab1,Bbs4,Psen1,Mbnl1,Slc39a3,Zfat,Zpr1,Add1,Rab23,Rad51b,Hoxb1,Ep300,Thoc5,Intu,Tbx15,Zbtb18,Rcn1,Dlc1,Zic5,Sulf1,Prickle1,Map3k7,Cnot3,Nr2f2,Eomes,Twist1,Csf2,Med21,Tbx1,Arl13b,Sp1,Lias,Traf3ip1,Rtcb,Ncor2,Mthfd1,Smad3,Cecr2,Prkcsh,Tmem…
GO:0032886	regulation of microtubule-based process	1.95275e-05	-10.8437	166	76	0.0119553	6357	20933	68041,103573,244329,70799,21749,70012,215351,208177,241035,20617,13518,16765,18472,214444,13837,66140,66985,68942,20620,20479,18148,232539,56327,67378,15505,57752,108903,19735,17245,78798,212514,26419,330938,19822,74256,13640,17755,56471,63873,380842,74201,16328,76499,320165,219103,14544,12389,66917,16783,66700,11789,74019,16568,74392,26425,235661,58522,68729,16551,12649,70235,228421,15185,18763,…	Mid1ip1,Xpo1,Mcph1,Cep192,Terf1,Cep85,Senp6,Phldb2,Pkhd1,Snca,Dst,Stmn1,Pafah1b1,Cdk5rap2,Epha3,Ska2,Rassf7,Chmp2b,Plk2,Vps4b,Npm1,Klhl42,Arl2,Bbs2,Hsph1,Tacc2,Tbcd,Rgs2,Mdm1,Eml4,Spice1,Mapk8,Dixdc1,Rnf4,Cyld,Efna5,Map1b,Stmn4,Trpv4,Stmnd1,Cep97,Cep250,Clasp2,Tacc1,Cenpj,Gda,Cav1,Chordc1,Lamp1,Chmp3,Apc,Traf3ip1,Kif3a,Specc1l,Nubp1,Dync1li1,Trim54,Trim37,Kif11,Chek1,Poc1a,Kif18a,Hdac6,Pkd1,Pdcd6…
GO:0009167	purine ribonucleoside monophosphate metabolic process	1.95275e-05	-10.8437	166	76	0.0119553	6357	20933	18648,67273,13382,12064,11717,231327,18746,230163,66218,14751,68550,12868,67126,12861,14297,18655,12183,433182,14923,67264,66052,56409,12862,23959,11637,11975,26430,22273,20617,11964,66152,80752,28080,50799,12869,11564,12858,74167,13807,407785,15277,12850,22272,11966,11949,21871,66416,229363,18641,75483,67003,67059,108147,56012,72141,68197,66454,11958,11951,14450,107197,17685,11946,68055,17257,12…	Pgam1,Ndufa10,Dld,Bdnf,Ampd3,Ppat,Pkm,Aldob,Ndufb9,Gpi1,Tefm,Cox8a,Atp5e,Cox6a1,Fxn,Pgk1,Bpgm,Eno1b,Guk1,Ndufb8,Sdhc,Nudt3,Cox6a2,Nt5e,Ak2,Atp6v0a1,Parg,Uqcrc1,Snca,Atp6v1a,Uqcr10,Fam20c,Atp5o,Slc25a13,Cox8b,Adsl,Cox5a,Nudt9,Eno2,Ndufs6,Hk2,Coq7,Uqcrq,Atp6v1b2,Atp5c1,Atp6v0a2,Ndufa7,Gmps,Pfkl,Cox8c,Uqcrc2,Ola1,Atic,Pgam2,Adpgk,Ndufc2,Nmnat1,Atp5k,Atp5g1,Gart,Uqcc3,Msh2,Atp5a1,Atp5s,Mecp2,Cox7c,Ad…
GO:1903649	regulation of cytoplasmic transport	1.97035e-05	-10.8347	21	16	0.00251691	6357	20933	7.71162e+83	Mtmr2,Rab21,Rab29,Ptpn23,Src,Dnajc13,Lrrk2,Ezr,Chmp3,Dab2,Snx12,Sorl1,Snx3,Map2k1,Rdx,Mapk1
GO:0060627	regulation of vesicle-mediated transport	1.97263e-05	-10.8336	448	177	0.0278433	6357	20933	13855,226407,320051,16410,18571,14020,74205,56044,16573,27681,14694,22350,18777,16423,13132,215114,19063,20910,19345,19684,226422,12389,104831,100502698,19246,18195,22339,93692,107065,15368,16783,66700,100855,215449,56807,226791,19288,16568,55988,66482,20239,78808,94190,227800,17918,71435,98878,12554,12921,67979,106522,16976,217201,20479,94245,20912,15239,223754,74244,116837,29809,72238,18645,937…	Epn2,Rab3gap1,Exph5,Itgav,Pdcd6ip,Evi5,Acsl3,Rala,Kif5b,Snf8,Rack1,Ezr,Lypla1,Cd47,Dab2,Hip1,Ppt1,Stxbp1,Rab5c,Rdx,Rab29,Cav1,Ptpn23,Rubcn,Ptpn1,Nsf,Vegfa,Glrx,Lrrtm2,Hmox1,Lamp1,Chmp3,Tbc1d14,Rap1b,Scamp5,Lyplal1,Ptx3,Kif3a,Snx12,Exoc2,Atxn2,Stxbp5,Ophn1,Rabgap1,Myo5a,Arhgap21,Ehd4,Cdh13,Crhr1,Atad1,Pkdcc,Lrpap1,Rundc1,Vps4b,Dtnbp1,Stxbp3,Hgs,Tbc1d22a,Atg7,Rims1,Rabgap1l,Tbc1d5,Pfn2,Pard3,Pparg,…
GO:0034644	cellular response to UV	1.9812e-05	-10.8292	67	37	0.00582036	6357	20933	1.36631e+190	Ei24,Crip1,Impact,Usp47,Eif2ak4,Xpa,Poli,Pbk,Usp28,Bak1,Rhbdd1,Eif2s1,Fmr1,Ddias,Tmem161a,Ppid,Trp53inp1,Yy1,Pcna,Fbxw7,Chek1,Kdm1a,Rnf168,Taf1,Ercc4,Mme,Pik3r1,Actr5,Triap1,N4bp1,Ino80,Ddb2,Cdc25a,Crebbp,Ep300,Trp63,Sirt1
GO:0014904	myotube cell development	2.06607e-05	-10.7873	29	20	0.00314614	6357	20933	1.80212e+103	Nfatc3,Ppp3ca,Dmd,Nfatc2,Ryr1,Gpx1,Xk,Rcan1,Myog,Stac3,Klhl41,Fam65b,Acta1,Cav2,Smo,Smyd3,Homer1,Ski,Cacna1s,Klhl40
GO:0014706	striated muscle tissue development	2.08577e-05	-10.7778	306	127	0.019978	6357	20933	19091,11459,20541,17684,193385,217082,14236,72900,112405,12390,12162,15182,73739,319757,68810,12922,13813,224640,17260,211323,11819,12848,19055,17691,380664,56771,17128,239719,12301,103806,22437,22003,12389,51810,64082,22339,18092,56642,17878,12224,54720,328572,244923,17295,108655,72330,26556,18996,20481,30928,72949,114142,13405,18741,65256,56758,241431,116904,320790,67451,75547,215031,74182,1639…	Prkg1,Acta1,Slc8a1,Cited2,Fam65b,Hlf,Foxn2,Ndufv2,Egln1,Cav2,Bmp7,Hdac2,Cby1,Smo,Nexn,Crhr2,Eomes,Lemd2,Mef2c,Nrg1,Nr2f2,Cops2,Ppp3ca,Sik1,Lemd3,Med20,Smad4,Mkl2,Cacybp,Maml1,Xirp1,Tpm1,Cav1,Hnrnpu,Popdc2,Vegfa,Nkx2-6,Ankrd2,Myf6,Klf5,Rcan1,Ep300,Klhl31,Met,Foxp1,Klhl40,Homer1,Pou4f1,Ski,Zbtb18,Ccnt2,Foxp2,Dmd,Pitx2,Asb2,Mbnl1,Xirp2,Alpk3,Chd7,Pkp2,Akap13,Vgll2,Gpcpd1,Isl1,Bmpr2,Speg,Stac3,Sgcb,F…
GO:0006376	mRNA splice site selection	2.10493e-05	-10.7686	23	17	0.00267422	6357	20933	1.01739e+91	Psip1,Ythdc1,Celf2,Snrpc,Srsf1,Srsf10,Celf1,Isy1,Srsf6,Mbnl1,Slu7,Luc7l2,Nol3,Ptbp2,Luc7l,Prpf39,Celf4
GO:0016241	regulation of macroautophagy	2.10899e-05	-10.7667	89	46	0.00723612	6357	20933	107607,228361,93759,56208,108079,20924,17168,54673,21821,73158,74244,229722,98732,15251,226407,225020,192656,64143,235180,19338,12177,11983,211134,15277,17281,18711,76983,64930,268656,74302,13853,56367,18475,225131,15368,319801,100855,74374,66725,24088,68943,66597,209478,14466,100502698,11975	Nod1,Ambra1,Sirt1,Becn1,Prkaa2,Supt5,Nprl3,Sh3glb1,Ift88,Larp1,Atg7,5330417C22Rik,Rab3gap2,Hif1a,Rab3gap1,Fez2,Ripk2,Ralb,Fez1,Rab33b,Bnip3l,Atpif1,Lzts1,Hk2,Fyco1,Pikfyve,Scfd1,Tsc1,Sptlc1,Mtmr3,Epm2a,Scoc,Pafah1b2,Wac,Hmox1,Tigar,Tbc1d14,Clec16a,Lrrk2,Tlr2,Pink1,Trim13,Tbc1d12,Gba,Rubcn,Atp6v0a1
GO:1903052	positive regulation of proteolysis involved in cellular protein catabolic process	2.13634e-05	-10.7538	94	48	0.00755073	6357	20933	20620,11983,268291,30945,56812,23806,93687,231600,50754,19164,270627,74244,71492,70620,56085,14694,12398,22218,26374,106042,13132,22225,50873,22433,71999,217410,218215,52551,17131,14466,244667,17246,70797,14629,211770,66725,53312,13645,100494,56736,66245,75841,170930,14083,67664,53380,14265,56515	Plk2,Atpif1,Rnf217,Rnf19a,Dnajb2,Arih1,Csnk1a1,Chfr,Fbxw7,Psen1,Taf1,Atg7,Bbs7,Ube2v2,Ubqln1,Rack1,Cbfa2t3,Sumo1,Rfwd2,Prickle1,Dab2,Usp5,Park2,Xbp1,Fbxo22,Trib2,Rnf144b,Sgta,Smad7,Gba,Disc1,Mdm2,Ankib1,Gclc,Trib1,Lrrk2,Nub1,Egf,Zfand2a,Rnf14,Hspbp1,Rnf139,Sumo2,Ptk2,Rnf125,Psmd10,Fmr1,Rnf138
GO:0044033	multi-organism metabolic process	2.15487e-05	-10.7452	25	18	0.00283152	6357	20933	2.05872e+95	Smarcb1,Eea1,Rab5a,Eif3l,Atg5,Ssb,Pcbp2,Pi4ka,Usf1,Eif3a,Rab29,Mon1b,Atg7,Ccnt2,Rock2,Atg16l2,Eif2ak4,Atg16l1
GO:0048524	positive regulation of viral process	2.18042e-05	-10.7334	72	39	0.00613497	6357	20933	2.20886e+201	Tsg101,Ppie,Ppib,Smarcb1,Stau1,Mvb12a,Srpk1,Ep300,Rad23a,Ythdc2,Stom,Mvb12b,Trim11,Nucks1,Vps4b,Ppid,Zfp72,Pabpc1,Trim21,Chmp2b,Vapb,Vps4a,Larp1,Adar,Zfp639,P4hb,Gtf2b,Cav2,Jun,Sp1,Fmr1,C330006A16Rik,Pkn2,Pcx,Snw1,Smarca4,Chmp3,Hacd3,Tbc1d20
GO:0009199	ribonucleoside triphosphate metabolic process	2.31503e-05	-10.6735	164	75	0.011798	6357	20933	73694,53893,72900,11977,11674,66945,11516,56428,18293,12867,68055,17257,11946,17685,107197,11958,11951,66454,68197,72141,56012,67059,67003,18950,75483,268566,51797,18641,21871,66416,11949,11966,22272,15277,12850,407785,12858,13807,12869,28080,50799,80752,66152,11964,66725,22273,20617,26430,11975,11637,18102,12862,67264,66052,433182,17434,14923,16434,12183,14297,18655,67126,12861,12868,68550,66218…	Ndufaf7,Nudt5,Ndufv2,Atp7a,Aldoa,Sdha,Adcyap1,Mtch2,Ogdh,Cox7c,Atp5s,Mecp2,Atp5a1,Msh2,Uqcc3,Atp5k,Atp5g1,Nmnat1,Ndufc2,Adpgk,Pgam2,Ola1,Uqcrc2,Pnp,Cox8c,Gphn,Ctps,Pfkl,Atp6v0a2,Ndufa7,Atp5c1,Atp6v1b2,Uqcrq,Hk2,Coq7,Ndufs6,Cox5a,Eno2,Cox8b,Atp5o,Slc25a13,Fam20c,Uqcr10,Atp6v1a,Lrrk2,Uqcrc1,Snca,Parg,Atp6v0a1,Ak2,Nme1,Cox6a2,Ndufb8,Sdhc,Eno1b,Mocs2,Guk1,Itpa,Bpgm,Fxn,Pgk1,Atp5e,Cox6a1,Cox8a,Tefm,Nd…
GO:2001022	positive regulation of response to DNA damage stimulus	2.33588e-05	-10.6645	77	41	0.00644958	6357	20933	9.37591e+213	Sirt1,Spred2,Apex1,Steap3,Fam178a,Pnp,Eya1,Slf1,Ube2v2,Egfr,Mrnip,Ercc8,Rnf168,Fam168a,Uimc1,Fam175a,Rif1,Fbxo18,Pcna,Eya3,Ube2n,Tmem161a,Eya4,Fmr1,Kdm4d,Rnf8,Ddx11,Apbb1,Nsmce4a,Plscr1,Pla2r1,Mtch2,Paxip1,Bclaf1,Ccar2,Nudt16,Tigar,Cebpg,Timeless,Eef1e1,Parg
GO:0031123	RNA 3'-end processing	2.34618e-05	-10.6601	65	36	0.00566305	6357	20933	4.33702e+192	Ncbp1,Cdc73,Clp1,Papolg,Exosc9,Polr2d,Exosc6,Pabpc2,Eri2,Exosc4,Cpsf2,Eri3,Supv3l1,Elac2,Ahcyl1,Cpsf6,Pabpn1,Sympk,Pnpt1,Elac1,Ints7,Fip1l1,Zc3h3,Cstf3,Pcf11,Cpsf1,Exosc7,Slbp,Papola,Exosc3,Lsm11,Zcchc6,Leo1,Eri1,Trnt1,Exosc8
GO:1903902	positive regulation of viral life cycle	2.34618e-05	-10.6601	65	36	0.00566305	6357	20933	1.84587e+185	Pabpc1,Chmp2b,Trim21,Zfp72,Ppid,Vps4b,Adar,P4hb,Zfp639,Vps4a,Vapb,Larp1,Stau1,Tsg101,Ppib,Smarcb1,Ppie,Stom,Nucks1,Trim11,Srpk1,Ythdc2,Rad23a,Ep300,Pcx,Snw1,Pkn2,Tbc1d20,Hacd3,Chmp3,Smarca4,Gtf2b,Cav2,Fmr1,Jun,Sp1
GO:0009126	purine nucleoside monophosphate metabolic process	2.52664e-05	-10.586	167	76	0.0119553	6357	20933	22272,11966,66416,21871,11949,18641,229363,75483,67003,67059,56012,108147,72141,66454,68197,11951,11958,17685,107197,11946,14450,12867,68055,17257,11516,18293,56428,11566,11674,72900,11977,66945,53893,73694,13382,67273,18648,231327,11717,12064,230163,18746,68550,14751,66218,67126,12861,12868,12183,18655,14297,66052,67264,14923,433182,12862,56409,11975,11637,23959,26430,11964,22273,20617,80752,661…	Uqcrq,Atp6v1b2,Ndufa7,Atp6v0a2,Atp5c1,Pfkl,Gmps,Cox8c,Uqcrc2,Ola1,Pgam2,Atic,Adpgk,Nmnat1,Ndufc2,Atp5g1,Atp5k,Msh2,Uqcc3,Atp5a1,Gart,Cox7c,Atp5s,Mecp2,Adcyap1,Ogdh,Mtch2,Adss,Aldoa,Ndufv2,Atp7a,Sdha,Nudt5,Ndufaf7,Dld,Ndufa10,Pgam1,Ppat,Ampd3,Bdnf,Aldob,Pkm,Tefm,Gpi1,Ndufb9,Atp5e,Cox6a1,Cox8a,Bpgm,Pgk1,Fxn,Sdhc,Ndufb8,Guk1,Eno1b,Cox6a2,Nudt3,Atp6v0a1,Ak2,Nt5e,Parg,Atp6v1a,Uqcrc1,Snca,Fam20c,Uqcr10…
GO:0000077	DNA damage checkpoint	2.55305e-05	-10.5756	92	47	0.00739342	6357	20933	72440,208836,12905,27354,56190,12450,19090,235323,71702,59126,15574,235559,26416,19356,225131,231724,17685,19355,234736,17246,15270,226591,22061,216965,225182,67941,269582,77065,12366,76454,27223,66131,105377,381921,227331,12753,68067,17535,11909,28000,102423,12649,70681,80280,19891,20184,218294	Rhno1,Fanci,Cradd,Nbn,Rbm38,Ccng1,Prkdc,Usp28,Cdc5l,Nek6,Hus1,Topbp1,Mapk14,Rad17,Wac,Rad9b,Msh2,Rad1,Rfwd3,Mdm2,H2afx,Tiprl,Trp63,Taok1,Rbbp8,Rps27l,Clspn,Ints7,Casp2,Fbxo31,Trp53bp1,Tipin,Slf1,Taok2,Gigyf2,Clock,Mrnip,Mre11a,Atf2,Prpf19,Hinfp,Chek1,Fam175a,Cdk5rap3,Rpa2,Uimc1,Cdc14b
GO:0035065	regulation of histone acetylation	2.70475e-05	-10.5179	49	29	0.0045619	6357	20933	1.72572e+150	Mecp2,Tada2b,Twist1,Snca,Atg7,Iws1,Smad4,Chek1,L3mbtl2,Isl1,Zfp451,Spi1,Rps6ka5,Sirt1,Eid1,Ctcf,Ep300,Brd7,Gata2,Atg5,Taf7,Arid5a,Auts2,Tada2a,Paxip1,Smarcb1,Nos1,Kat2b,Snai2
GO:0043067	regulation of programmed cell death	2.85328e-05	-10.4645	1402	494	0.0777096	6357	20933	22629,57432,18761,20620,14050,67890,12064,227059,30949,22034,14732,18453,56417,15505,223870,11796,66191,30923,72508,68015,16880,14297,15402,72930,21938,21814,67500,27280,73916,22592,112407,108079,26398,17979,18102,384783,109880,319583,17075,17342,14082,66143,56449,11491,12359,14634,56215,80890,13636,12123,235320,72171,26399,234664,17938,68493,66471,19017,14013,14051,50755,12167,19885,26885,17700,…	Ywhah,Zc3h8,Prkcq,Plk2,Eya3,Ufm1,Bdnf,Slc39a10,Lcmt1,Traf6,Gpam,P4hb,Adar,Hsph1,Senp1,Birc3,Ier3ip1,Foxe3,Rps6kb1,Trap1,Lifr,Fxn,Hoxa5,Ppp2r2b,Tnfrsf1b,Tgfbr3,Ccar1,Phlda3,Ift57,Ercc5,Egln3,Prkaa2,Map2k4,Ncoa3,Nme1,Irs2,Braf,Lig4,Epcam,Mitf,Fadd,Eef1e1,Ybx3,Adam17,Cat,Gli3,Acin1,Trim2,Efna1,Hrk,Zbtb16,Shq1,Map2k6,Nae1,Naca,Ndufaf4,Anp32e,Ppargc1a,Mecom,Eya4,Fbxo18,Bmpr1b,Rorc,Casp8ap2,Mstn,Rps6ka…
GO:0016032	viral process	2.86815e-05	-10.4593	128	61	0.00959572	6357	20933	107829,72543,98415,20823,73711,11793,23825,66231,73666,67064,13858,15161,50873,76959,22088,216238,20587,77040,73683,67778,19878,72949,16337,56491,17127,116733,74244,270096,68942,13669,20479,58235,16410,18571,225160,224020,68441,223691,271457,66201,12121,68576,26965,13030,12390,27103,67231,21355,321006,230738,66700,75778,18563,12454,226422,58203,78610,22278,110355,12389,18521	Thoc5,Mvb12b,Nucks1,Ssb,Mvb12a,Atg5,Banf1,Thoc7,Thoc3,Chmp1b,Eps15,Hcfc1,Park2,Chmp5,Tsg101,Eea1,Smarcb1,Atg16l1,Atg16l2,Zfp639,Rock2,Ccnt2,Insr,Vapb,Smad3,Vps4a,Atg7,Mon1b,Chmp2b,Eif3a,Vps4b,Nectin1,Itgav,Pdcd6ip,Thoc1,Pi4ka,Rraga,Eif3l,Rab5a,Vta1,Bicd1,Lamtor5,Cul1,Ctsb,Cav2,Eif2ak4,Tbc1d20,Tap2,Vprbp,Zc3h12a,Chmp3,Them4,Pcx,Ccnk,Rab29,Zbp1,Uvrag,Usf1,Grk2,Cav1,Pcbp2
GO:0031401	positive regulation of protein modification process	3.08427e-05	-10.3866	1058	381	0.0599339	6357	20933	72514,13649,30877,59041,72149,21832,14745,71782,13982,98878,54473,21676,94245,14225,18584,108705,18645,381293,17131,13640,107607,13867,12163,381126,58231,14339,232560,26936,218397,70097,14538,66725,23922,13645,100504663,76108,78757,17451,68943,66354,26390,74016,56706,268697,23988,208836,109905,13614,14694,16168,12283,107995,18198,75547,230861,14254,12168,56426,18763,20319,12511,16392,224014,21741…	Fgfbp3,Egfr,Gnl3,Stk25,Strada,Thpo,Lpar1,Ankle2,Esr1,Ehd4,Tollip,Tead1,Dtnbp1,Fkbp1a,Pde8a,Pttg1ip,Pfn2,Kif14,Smad7,Efna5,Nod1,Erbb3,Bmp8a,Garem1,Stk4,Aktip,Caprin2,Mprip,Rasa1,Sash1,Gcnt2,Lrrk2,Jtb,Egf,Atg14,Rap2a,Rictor,Mos,Pink1,Snw1,Mapkbp1,Phf19,Ccnl1,Ccnb1,Pin1,Fanci,Rap1a,Edn1,Rack1,Il15,Cab39,Cdc20,Musk,Akap13,Eif4g3,Flt1,Bmpr2,Pdcd10,Pkd1,Sfrp2,Cd6,Isl1,Fgd4,Trib2,Kras,Fzd1,Hdac1,Bcl10,C…
GO:0044764	multi-organism cellular process	3.22458e-05	-10.3421	131	62	0.00975303	6357	20933	58235,20479,225160,224020,18571,16410,270096,68942,13669,116733,56491,17127,74244,73683,77040,72949,16337,19878,67778,22088,20587,216238,50873,15161,13858,67064,73666,66231,23825,76959,73711,11793,20823,72543,107829,98415,22278,18521,110355,12389,18563,12454,78610,58203,226422,321006,75778,230738,66700,67231,27103,21355,13030,68576,26965,12121,12390,20520,66201,223691,68441,271457	Nectin1,Vps4b,Thoc1,Pi4ka,Pdcd6ip,Itgav,Mon1b,Chmp2b,Eif3a,Vps4a,Vapb,Smad3,Atg7,Atg16l2,Atg16l1,Ccnt2,Insr,Rock2,Zfp639,Tsg101,Smarcb1,Eea1,Park2,Hcfc1,Eps15,Chmp1b,Thoc3,Thoc7,Banf1,Chmp5,Mvb12a,Atg5,Ssb,Mvb12b,Thoc5,Nucks1,Usf1,Pcbp2,Grk2,Cav1,Pcx,Ccnk,Uvrag,Zbp1,Rab29,Vprbp,Them4,Zc3h12a,Chmp3,Tbc1d20,Eif2ak4,Tap2,Ctsb,Lamtor5,Cul1,Bicd1,Cav2,Slc22a5,Vta1,Eif3l,Rraga,Rab5a
GO:0009205	purine ribonucleoside triphosphate metabolic process	3.25273e-05	-10.3334	160	73	0.0114834	6357	20933	18641,11949,21871,66416,11966,22272,56012,67059,67003,18950,268566,75483,17257,68055,12867,11946,107197,17685,11958,11951,66454,72141,68197,73694,53893,66945,11977,72900,11674,18293,56428,11516,66218,14751,68550,18746,230163,12064,11717,18648,13382,67273,12862,18102,17434,433182,14923,16434,67264,66052,14297,18655,12183,12868,67126,12861,66152,80752,22273,20617,66725,11964,26430,11975,11637,12850…	Pfkl,Atp5c1,Atp6v0a2,Ndufa7,Atp6v1b2,Uqcrq,Pgam2,Ola1,Uqcrc2,Pnp,Gphn,Cox8c,Mecp2,Atp5s,Cox7c,Atp5a1,Uqcc3,Msh2,Atp5k,Atp5g1,Nmnat1,Adpgk,Ndufc2,Ndufaf7,Nudt5,Sdha,Atp7a,Ndufv2,Aldoa,Ogdh,Mtch2,Adcyap1,Ndufb9,Gpi1,Tefm,Pkm,Aldob,Bdnf,Ampd3,Pgam1,Dld,Ndufa10,Cox6a2,Nme1,Mocs2,Eno1b,Guk1,Itpa,Ndufb8,Sdhc,Fxn,Pgk1,Bpgm,Cox8a,Atp5e,Cox6a1,Uqcr10,Fam20c,Uqcrc1,Snca,Lrrk2,Atp6v1a,Parg,Atp6v0a1,Ak2,Coq7…
GO:1901983	regulation of protein acetylation	3.28563e-05	-10.3234	61	34	0.00534843	6357	20933	5.73212e+176	Terf2ip,Smarcb1,Snai2,Kat2b,Hdac1,Xbp1,Tada2a,Ep300,Atg5,Eid1,Sirt1,Rps6ka5,Zfp451,Isl1,Chek1,L3mbtl2,Atg7,Tada2b,Nos1,Hdac2,Paxip1,Auts2,Arid5a,Brd7,Taf7,Gata2,Ctcf,Spi1,Sirt3,Smad4,Snca,Iws1,Mecp2,Twist1
GO:0046605	regulation of centrosome cycle	3.62699e-05	-10.2245	45	27	0.00424729	6357	20933	2.04792e+141	Vps4b,Plk2,Pdcd6ip,Cep192,Npm1,Xpo1,Chek1,Poc1a,Cenpj,Mcph1,Chmp2b,Chmp3,Chordc1,Pkhd1,Rock2,Cep85,Chmp1b,Spice1,Mdm1,Cdk5rap2,Chmp5,Mapk8,Kif11,Trim37,Nubp1,Dync1li1,Stil
GO:0006998	nuclear envelope organization	3.62699e-05	-10.2245	45	27	0.00424729	6357	20933	2.22187e+146	Sumo1,Tmem170,Reep3,Tor1b,Ubxn2a,Parp11,Pafah1b1,Asun,Nup54,Nsfl1c,Osbpl8,Tardbp,Tor1a,Chmp7,Ubxn2b,Dmpk,Zmpste24,Sun1,Nup155,Ndel1,Ankle2,Lemd3,Akap8l,Spast,Cdan1,Lemd2,Tor1aip2
GO:0044087	regulation of cellular component biogenesis	3.85311e-05	-10.164	786	290	0.045619	6357	20933	17975,12224,623781,211673,56208,20460,83814,11482,50873,17973,21916,23897,19878,21809,56812,19338,58994,20844,68729,29819,14265,66148,76983,12652,20660,21826,18386,14544,195208,231070,22003,226352,16981,242687,233871,19184,236266,56443,74256,56363,17755,105377,22088,16885,19822,13380,14260,26419,15214,329679,116733,242894,75811,67046,11797,18148,14063,72754,56376,14432,228003,104445,13631,18011,7…	Ncl,Klf5,Gm14137,Arfgef1,Becn1,Stil,Nedd4l,Acvrl1,Park2,Nck1,Tmod1,Hax1,Rock2,Tgfb3,Dnajb2,Rab33b,Smpd3,Stam,Trim37,Stau2,Fmr1,Dnajc15,Scfd1,Chga,Sorl1,Thbs2,Oprd1,Gda,Dcdc2a,Insig1,Tpm1,Epb41l5,Lrrn3,Wasf2,Atxn2l,Psmc5,Alms1,Arpc1a,Cyld,Tmeff2,Map1b,Slf1,Tsg101,Limk1,Rnf4,Dkk1,Fmn1,Mapk8,Hey2,Fnip2,Vps4a,Actr3b,Saxo1,Tbc1d7,Birc2,Npm1,F2rl1,Arhgef10l,Pdlim5,Gap43,Klhl41,Cdc42ep1,Eef2k,Neurl1a,Bc…
GO:1902532	negative regulation of intracellular signal transduction	4.09271e-05	-10.1037	453	177	0.0278433	6357	20933	19042,66725,12282,241035,19062,80909,13383,266692,14775,277360,68943,231532,54607,26427,23988,234371,319520,64930,21898,18472,19122,16438,12370,20846,101476,21859,15239,108705,12261,17165,13982,106504,11865,110213,12702,74143,29806,218397,66505,21808,80751,18016,19735,22433,19883,241568,56705,14873,224640,74996,320271,12389,237847,19246,17128,64384,103583,53380,15259,15182,12162,75747,52033,71544…	Ppm1a,Lrrk2,Hyou1,Pkhd1,Inpp5k,Gatsl2,Dlg1,Cpne1,Gpx1,Prex1,Pink1,Arhgap24,Socs6,Creb3l1,Pin1,Tmem161a,Dusp4,Tsc1,Tlr4,Pafah1b1,Prnp,Itpr1,Casp8,Stat1,Plekha1,Timp3,Hgs,Pttg1ip,C1qbp,Mapkapk5,Esr1,Stk38,Arntl,Tmbim6,Socs3,Opa1,Limd1,Rasa1,Zmynd11,Tgfb2,Rnf34,Nf2,Rgs2,Xbp1,Rora,Lrrc4c,Ranbp9,Gsto1,Lemd2,Usp47,Scai,Cav1,Rtn4rl1,Ptpn1,Smad4,Sirt3,Fbxw11,Psmd10,Hipk3,Hdac2,Bmp7,Sesn3,Pbk,Arhgap42,G2e…
GO:0055001	muscle cell development	4.12513e-05	-10.0958	145	67	0.0105396	6357	20933	237611,24051,17996,56376,228003,11790,108058,12292,14200,50876,74376,16691,69597,20190,14775,22439,68927,320502,17928,77579,11793,26398,16412,15214,237560,74244,17258,18021,22388,68016,70417,58522,20541,109676,193385,237500,19091,11459,69726,15182,319757,12390,68810,50875,68794,19055,103806,22437,51810,64082,22339,54720,18092,68802,26556,20481,11938,17295,108655,72330,59006,13405,18019,18741,2191…	Stac3,Sgcb,Neb,Pdlim5,Klhl41,Speg,Camk2d,Cacna1s,Fhl2,Tmod2,Myo18b,Krt8,Afg3l2,Ryr1,Gpx1,Xk,Ptcd2,Lmod3,Myog,Myh10,Atg5,Map2k4,Itgb1,Hey2,Lrrc10,Atg7,Mef2a,Nfatc3,Wdr1,Murc,Megf10,Trim54,Slc8a1,Ank2,Fam65b,Tmtc3,Prkg1,Acta1,Smyd3,Hdac2,Smo,Cav2,Nexn,Tmod3,Flnc,Ppp3ca,Maml1,Xirp1,Hnrnpu,Popdc2,Vegfa,Rcan1,Nkx2-6,Mypn,Homer1,Ski,Atp2a2,Met,Foxp1,Klhl40,Myoz2,Dmd,Nfatc2,Pitx2,Tmod1,Alpk3,Kdm1a
GO:0034504	protein localization to nucleus	4.50118e-05	-10.0086	172	77	0.0121126	6357	20933	16649,445007,22218,16647,106042,269113,55989,72400,209361,227720,66069,102774,18708,21809,230597,12053,170762,16211,74254,16476,20742,103468,234549,12162,319757,240614,223513,320727,238799,19055,18386,240832,70572,258153,17246,77053,218210,11865,66810,18969,20963,70699,30931,68080,16650,72135,53317,21808,71177,83946,233726,64009,56417,108705,56327,110750,19386,26413,237542,320938,195236,18141,718…	Kpna4,Nup85,Sumo1,Kpna2,Prickle1,Nup54,Nop58,Pinx1,Taf3,Nup214,Snupn,Bbs4,Pik3r1,Tgfb3,Zfyve9,Bcl6,Nup155,Kpnb1,Gpn1,Jun,Sptbn1,Nup107,Heatr3,Bmp7,Smo,Ranbp6,Abra,Ipo8,Tnpo1,Ppp3ca,Oprd1,Tor1aip2,Ipo5,Olfr412,Mdm2,Sun1,Nup153,Arntl,Rbm22,Pola2,Syk,Nup205,Tor1a,Gpn3,Kpna6,Pygo1,Plrg1,Tgfb2,Asun,Phip,Ipo7,Syne1,Adar,Pttg1ip,Arl2,Cse1l,Ranbp2,Mapk1,Osbpl8,Tnpo3,Pom121l2,Nup50,Nupl1,Rpl11,Zbtb16,Cnep…
GO:0051303	establishment of chromosome localization	4.70716e-05	-9.96384	69	37	0.00582036	6357	20933	7.24001e+196	Pinx1,Vps4a,Ndc80,Kif22,Rab11a,Vps4b,Kif18a,Chmp2b,Ndel1,Cenpc1,Zw10,Brca2,Seh1l,Chmp7,Mad1l1,Spdl1,Becn1,Kif14,Ccdc155,Mlh1,Chmp5,Spice1,Chmp1b,Rrs1,Champ1,Lemd3,Lemd2,Cdc23,Terf1,Cenpf,Mis12,Actr2,Sun1,Kpnb1,Kif2c,Actr3,Ccnb1
GO:0035967	cellular response to topologically incorrect protein	4.70716e-05	-9.96384	69	37	0.00582036	6357	20933	7.52123e+197	Rnf121,Eif2ak4,Pomt1,Tbl2,Klhl15,Edem3,Ptpn1,Sdf2l1,Pacrg,Eif2ak2,Hspa5,Creb3l1,Rhbdd1,Eif2ak3,Atf6,Uggt1,Bhlha15,Selenos,Vapb,Ankzf1,Atf3,Ube2w,Amfr,Hdac6,Dnajc3,Creb3l2,Edem2,Cdk5rap3,Atxn3,Ep300,Derl1,Tor1a,Atf4,Edem1,Uggt2,Xbp1,Ero1l
GO:0007010	cytoskeleton organization	4.73842e-05	-9.95722	857	313	0.0492371	6357	20933	19878,21916,17973,235431,67884,20460,76779,26951,19201,18590,246103,13197,68922,319710,320165,77053,242687,226352,103768,22003,15463,109359,20595,99167,75786,12922,67299,17258,242894,227743,57752,76757,194401,13728,11641,18148,72415,74569,17755,20501,57434,98366,56443,16328,12190,16563,77569,70430,74362,14260,71177,16412,233406,20779,20655,57778,12566,13800,12175,244329,101314,228859,59032,20874,…	Rock2,Tmod1,Nck1,Coro2b,1810043G02Rik,Stil,Cluap1,Zw10,Pstpip2,Pdgfa,Atxn7,Gadd45a,Dnaic1,Frmd6,Tacc1,Sun1,Wasf2,Epb41l5,Tubg2,Tpm1,Agfg1,Fam175b,Smn1,Ssx2ip,Ckap5,Crhr2,Dock7,Mef2a,Actr3b,Mapkap1,Tacc2,Trdn,Mical3,Mark2,Akap2,Npm1,Sgol1,Ttc17,Map1b,Slc16a1,Xrcc2,Smap1,Arpc1a,Cep250,Brca2,Kif2a,Limch1,Tbce,Spag17,Fmn1,Asun,Itgb1,Prc1,Src,Sod1,Fmnl1,Cdk2,Enah,Bnip2,Mcph1,Brk1,Fitm2,Ppp2r3c,Slk,Rap…
GO:0010948	negative regulation of cell cycle process	4.84655e-05	-9.93466	175	78	0.0122699	6357	20933	18148,12237,13982,80280,19891,26914,17248,116733,235041,378430,30923,12380,105377,17245,269582,21951,52679,21749,70799,105837,17451,83560,15468,69754,19356,14841,214444,15574,214498,12450,234664,224023,56190,27354,208836,12905,71943,218914,13000,56150,12649,50754,12235,72611,59036,20112,17535,227331,68067,69034,77011,12366,76454,26951,107047,67941,20460,17120,22061,22137,17246,12236,234736,19355,…	Npm1,Bub3,Esr1,Cdk5rap3,Rpa2,H2afy,Mdm4,Vps4a,Kank2,Nanos2,Foxe3,Cast,Slf1,Mdm1,Clspn,Tnks,E2f7,Terf1,Cep192,Mtbp,Mos,Tex14,Prmt2,Fbxo7,Rad17,Gsg2,Cdk5rap2,Hus1,Cdc73,Ccng1,Nae1,Klhl22,Rbm38,Nbn,Fanci,Cradd,Tom1l1,Wapl,Csnk2a2,Mad2l1,Chek1,Fbxw7,Bub1,Zfp655,Dact1,Rps6ka2,Mre11a,Gigyf2,Mrnip,Nupr1l,Ticrr,Casp2,Fbxo31,Zw10,Psmg2,Rps27l,Stil,Mad1l1,Trp63,Ttk,Mdm2,Bub1b,Rfwd3,Rad1,Fzd9,Ccnk,Tom1l2,Ms…
GO:0070646	protein modification by small protein removal	4.85985e-05	-9.93192	122	58	0.0091238	6357	20933	30931,74256,223527,246103,170707,70675,109115,22225,59029,76179,223870,108679,319651,26572,21929,230484,22284,30940,20184,110616,320213,22217,329908,59025,99526,72607,68149,230789,228790,26891,50933,216825,14479,109359,224836,66960,76800,235323,24075,432940,100683,320713,227334,54644,235461,215351,78787,56207,327799,74996,74112,26895,230738,12848,22224,84092,77593,17847	Tor1a,Cyld,Eny2,Atxn7,Usp48,Vcpip1,Supt3,Usp5,Psmd14,Usp31,Senp1,Cops8,Usp37,Cops3,Tnfaip3,Usp1,Usp9x,Usp25,Uimc1,Atxn3,Senp5,Usp12,Usp24,Usp14,Usp53,Usp13,Otub2,Fam76a,Asxl1,Cops4,Uchl3,Usp22,Usp15,Fam175b,Usp49,Fam188a,Usp42,Usp28,Taf10,Otulin,Trrap,Mysm1,Usp40,Otud5,Fam63b,Senp6,Usp54,Uchl5,Usp44,Usp47,Usp16,Cops7b,Zc3h12a,Cops2,Usp10,Usp8,Usp45,Usp34
GO:0034067	protein localization to Golgi apparatus	5.0094e-05	-9.90161	26	18	0.00283152	6357	20933	5.42148e+96	Golga4,Golga1,Paqr3,Cog7,Sys1,Sorl1,Gcc1,Gbf1,Rab6a,Vps13d,Gak,Vps13a,Golph3,Rab33b,Nras,Arl1,Atp9b,Gcc2
GO:0006900	membrane budding	5.49921e-05	-9.80832	39	24	0.00377537	6357	20933	6.70642e+124	Chmp1b,Golph3l,Vta1,Chmp5,Preb,Tsg101,Wasl,Prkci,Klhl12,Gbf1,Snx3,Tmed10,Golph3,Trim72,Sec16b,Tmed9,Chmp2b,Vps4b,Pdcd6ip,Tbc1d20,Vps4a,Atp8a1,Vapb,Chmp3
GO:0071166	ribonucleoprotein complex localization	5.6077e-05	-9.78879	67	36	0.00566305	6357	20933	2.23642e+198	Zc3h3,Eny2,Ddx25,Ddx39,Thoc5,Sarnp,Nup85,Pabpn1,Fyttd1,Thoc3,Nop58,Xpot,Thoc7,Rrs1,Srsf10,Smg6,Nup214,BC005561,Gle1,Npm1,Thoc1,Alkbh5,Nup155,Ddx19a,Smg5,Nmd3,Abce1,Nup160,Polr2d,Nup107,Tsc1,Shfm1,Ddx19b,Ncbp1,Ltv1,Xpo1
GO:0042981	regulation of apoptotic process	5.66474e-05	-9.77867	1386	486	0.0764512	6357	20933	22411,22418,11783,20874,23892,18712,21749,21812,20655,109700,20779,219158,12402,16973,14365,15468,236732,71514,214498,109815,106298,94044,67154,223453,72567,60595,108058,17311,18011,13666,71877,13631,382985,192656,11797,117198,21987,12211,225160,18148,11910,14751,15251,23992,12166,15214,26419,16412,338372,27053,17420,74256,277432,56295,57434,93759,236266,14629,18984,14360,232679,14815,52440,98267…	Wnt11,Wnt5a,Apaf1,Slk,Grem1,Pim1,Terf1,Tgfbr1,Sod1,Itga1,Src,Ccar2,Cbl,Lrp5,Fzd3,Prmt2,Rbm10,Sfpq,Cdc73,Selenos,Rrn3,Bcl2l13,Mtdh,Dap,Bclaf1,Actn4,Camk2d,Kitl,Neurl1a,Eif2ak3,Efhc1,Eef2k,Rrm2b,Ripk2,Birc2,Ivns1abp,Tpd52l1,Birc6,Thoc1,Npm1,Atf3,Gpi1,Hif1a,Prkra,Bmpr1a,Hey2,Mapk8,Itgb1,Map3k9,Asns,Mnat1,Cyld,Vstm2l,Higd1a,Xrcc2,Sirt1,Alms1,Gclc,Por,Fyn,Zc3hc1,Nr3c1,Tax1bp1,Stk17b,Msh2,Sgms1,Gnaq,Ad…
GO:0046486	glycerolipid metabolic process	5.87568e-05	-9.7421	250	105	0.0165172	6357	20933	83493,93759,72108,233789,72519,12894,228812,225651,216739,18805,14732,50790,230779,224020,329777,13350,74596,219024,66082,77626,66268,72999,84652,66459,104718,27388,74302,84095,16331,67452,67073,67469,66659,11727,18711,16195,217480,12359,14933,219135,12491,19062,67420,28042,14775,114663,241062,53332,77116,50767,20975,54608,225326,56442,14178,18704,668212,101490,16592,103199,14245,66586,104015,546…	Sacm1l,Sirt1,Ddhd2,Smg1,Tmem55a,Cpt1a,Pigu,Mppe1,Acsl6,Pld1,Gpam,Acsl4,Serinc2,Pi4ka,Pigk,Dgat1,Cds1,Tmem55b,Abhd6,Smpd4,Pigyl,Insig2,Fam126a,Pyurf,Ttc7b,Ptdss2,Mtmr3,Pi4k2a,Inpp5d,Pnpla8,Pi4k2b,Abhd5,Acp6,Ang,Pikfyve,Il6st,Dgkb,Cat,Gk,Mtmr6,Cd36,Inpp5k,Far1,Selenoi,Gpx1,Impa2,Pgap1,Mtmr1,Mtmr2,Pnpla6,Synj2,Abhd2,Pik3c3,Serinc1,Fgf7,Pik3c2a,Efr3b,Inpp5f,Fabp5,Fig4,Lpin1,Crls1,Synj1,Sh3glb1,Mttp,C…
GO:0006457	protein folding	5.884e-05	-9.74069	157	71	0.0111688	6357	20933	12466,70356,21454,12464,54673,66435,68559,27055,56031,100900,50527,67466,66087,228005,56812,67418,67738,72599,72736,19038,17281,56612,30934,67943,13418,15526,71853,18087,66917,209586,18415,338355,114230,70430,67988,30931,69480,52653,93684,67199,68015,19035,108903,12465,15505,67072,66736,18453,14225,12304,12955,106200,15519,213539,19386,73316,12954,12330,66861,21371,320011,52837,19298,56691,70225,…	Cct6a,St13,Tcp1,Cct4,Sh3glb1,Uggt2,Pdrg1,Fkbp9,Ppie,Hscb,Ero1l,Pdcl,Emc3,Ppig,Dnajb2,Ppil4,Ppid,Pdia5,Tmx1,Ppic,Fyco1,Pfdn5,Tor1b,Mesdc2,Dnajc1,Hspa9,Pdia6,Nktr,Chordc1,Nudcd3,Hspa4l,Fkbp15,Aipl1,Tbce,Tmx3,Tor1a,Ttc9,Nudcd2,Selenof,Pfdn1,Trap1,Ppib,Tbcd,Cct5,Hsph1,Cdc37l1,Emc2,P4hb,Fkbp1a,Pdia4,Cryab,Txndc11,Hsp90aa1,Bag2,Ranbp2,Calr3,Cryaa,Canx,Dnajc10,Tbca,Uggt1,Tmx4,Pex19,Dnajb8,Ppil3,Fkbp5,Cc…
GO:0046496	nicotinamide nucleotide metabolic process	6.04789e-05	-9.71322	97	48	0.00755073	6357	20933	74637,15277,14555,11674,16832,17448,13807,110208,19895,55951,333433,100198,18293,78920,21351,66454,72141,56012,59027,17449,66646,433182,68263,170718,67834,70456,12183,18655,235339,107766,18597,192185,18641,14751,14148,230163,68646,14571,18746,14149,266690,21881,27402,13382,15929,74080,18115,18648	Shpk,Hk2,Gpd1,Aldoa,Ldhb,Mdh2,Eno2,Pgd,Rpia,Mpc1,Gpd1l,H6pd,Ogdh,Dlst,Taldo1,Nmnat1,Adpgk,Pgam2,Nampt,Mdh1,Rpe,Eno1b,Pdhb,Idh3b,Idh3a,Mpc2,Bpgm,Pgk1,Dlat,Haao,Pdha1,Nadk,Pfkl,Gpi1,Fdx1,Aldob,Nadk2,Gpd2,Pkm,Fdxr,Cyb5r4,Tkt,Pdhx,Dld,Idh3g,Nmnat3,Nnt,Pgam1
GO:0006406	mRNA export from nucleus	6.24619e-05	-9.68095	46	27	0.00424729	6357	20933	6.98232e+151	Fyttd1,Shfm1,Ddx19b,Thoc3,Thoc7,Ncbp1,Srsf10,Nup85,Sarnp,Pabpn1,Ddx25,Ddx39,Nup107,Nup160,Polr2d,Thoc5,Eny2,Zc3h3,Ddx19a,Smg5,Nup155,Thoc1,Alkbh5,BC005561,Gle1,Nup214,Smg6
GO:0071427	mRNA-containing ribonucleoprotein complex export from nucleus	6.24619e-05	-9.68095	46	27	0.00424729	6357	20933	2.2772e+151	Nup214,Smg6,BC005561,Gle1,Thoc1,Alkbh5,Nup155,Eny2,Zc3h3,Ddx19a,Smg5,Ddx25,Ddx39,Polr2d,Thoc5,Nup107,Nup160,Nup85,Sarnp,Pabpn1,Fyttd1,Shfm1,Thoc7,Thoc3,Ddx19b,Srsf10,Ncbp1
GO:0006635	fatty acid beta-oxidation	6.39654e-05	-9.65717	53	30	0.00471921	6357	20933	2.27095e+156	Hibch,Ppard,Acoxl,Acad8,Eci2,Echs1,Acat1,Acadsb,Auh,Acadm,Hadhb,Slc25a17,Abcd2,Pex7,Ivd,Crot,Eci1,Acad10,Acad9,Acat2,Hadh,Pex2,Pex5,Gcdh,Abcd3,Hsd17b4,Etfa,Etfdh,Acadl,Acaa2
GO:0071479	cellular response to ionizing radiation	6.39654e-05	-9.65717	53	30	0.00471921	6357	20933	6.85391e+152	Tmem109,Cryab,Tank,Wrn,H2afx,Net1,Sfrp2,Nipbl,Kdm1a,Rad1,Fignl1,Rad9b,Clock,Rhob,Mapk14,Snai2,Rnf4,Xrcc5,Xrcc6,Gadd45a,Hus1,Ino80,Ints7,Kdm4d,Fbxo4,Rhno1,Rad51ap1,Sirt1,Nucks1,Ddias
GO:1903008	organelle disassembly	6.68004e-05	-9.6138	65	35	0.00550574	6357	20933	1.68651e+184	Eif2d,Rb1cc1,Atg3,Atg4d,Hdac6,Spast,Kif5b,Atg7,Atg12,Map1lc3a,Capn10,Tomm7,Fundc2,Wdr45b,Wipi2,Park2,Gbf1,Cisd2,Denr,Wdr45,Map1lc3b,Ambra1,Fundc1,Becn1,Atg5,Pink1,Atg4c,Fbxo7,Atg14,Hbs1l,Vrk1,Atg13,Atg2a,Gfm2,Mtif3
GO:0071426	ribonucleoprotein complex export from nucleus	6.68004e-05	-9.6138	65	35	0.00550574	6357	20933	2.2516e+193	Thoc1,Npm1,Alkbh5,Nup155,Nup214,Smg6,BC005561,Gle1,Pabpn1,Sarnp,Nup85,Fyttd1,Rrs1,Srsf10,Xpot,Thoc3,Thoc7,Zc3h3,Eny2,Ddx39,Ddx25,Thoc5,Xpo1,Tsc1,Shfm1,Ncbp1,Ltv1,Ddx19b,Smg5,Ddx19a,Abce1,Nmd3,Polr2d,Nup107,Nup160
GO:0006888	ER to Golgi vesicle-mediated transport	7.07913e-05	-9.55577	70	37	0.00582036	6357	20933	5.64912e+192	Vapb,Sec22b,Uso1,Spast,Copb1,Lman2l,Gosr1,Creb3l2,Zw10,Copb2,Ddhd2,Vti1b,Klhl12,Sec22a,Ier3ip1,Mppe1,Ank1,Stx17,Trappc6b,Lman2,Tbc1d20,Bet1,Sec23ip,Hyou1,Stx18,Cog3,Yif1b,Sec16b,Sec24a,Vti1a,Nrbp1,Trappc8,Ergic1,Sec23b,Ykt6,Preb,Trappc4
GO:0019395	fatty acid oxidation	7.07913e-05	-9.55577	70	37	0.00582036	6357	20933	5.63571e+193	Ivd,Eci1,Crot,Slc25a17,Abcd2,Hadhb,Acadsb,Cd36,Por,Auh,Echs1,Acoxl,Eci2,Etfdh,Acadl,Acaa2,Cyp4v3,Pex2,Hadh,Mapk14,Mlycd,Acad9,Acad10,Pex7,Acadm,Acat1,Ppard,Acad8,Hibch,Prkaa1,Pparg,Etfa,Hsd17b4,Pex5,Abcd3,Gcdh,Acat2
GO:0050000	chromosome localization	7.07913e-05	-9.55577	70	37	0.00582036	6357	20933	1.62117e+196	Kpnb1,Kif2c,Actr3,Ccnb1,Terf1,Cenpf,Actr2,Mis12,Sun1,Champ1,Lemd3,Cdc23,Lemd2,Mlh1,Chmp5,Chmp1b,Spice1,Rrs1,Zw10,Cenpc1,Brca2,Seh1l,Chmp7,Mad1l1,Spdl1,Becn1,Kif14,Ccdc155,Kif22,Rab11a,Vps4b,Kif18a,Chmp2b,Ndel1,Pinx1,Vps4a,Ndc80
GO:0007018	microtubule-based movement	7.24651e-05	-9.53241	204	88	0.013843	6357	20933	17828,209737,74682,72515,16573,319953,11778,52028,20615,228421,67774,110033,83431,73668,53883,72938,13427,76779,234663,252967,16558,68922,16582,67694,56087,16709,75782,209012,319991,77053,13424,66713,17918,320662,17281,71435,16551,16211,67286,235661,109242,74019,16568,16594,99167,16580,15251,264134,50850,78802,234847,16554,56444,214585,18457,94245,16570,76568,216344,16563,73689,16564,73916,381293…	Bloc1s5,Kif15,Wdr35,Wdr43,Kif5b,Ttll1,Ap3s2,Bbs1,Snapin,Kif18a,Borcs5,Kif22,Ndel1,Ttc21b,Celsr2,Hspb11,Dync1i2,Cluap1,Dync1li2,Ropn1l,Kif16b,Dnaic1,Kifc3,Ift74,Dnah10,Ktn1,Lca5,Ulk4,Kif6,Sun1,Dync1h1,Actr2,Myo5a,Casc1,Fyco1,Arhgap21,Kif11,Kpnb1,Ift22,Dync1li1,Kif24,Traf3ip1,Kif3a,Klc2,Ssx2ip,Kifc5b,Hif1a,Ttc26,Spast,Ttc30a1,Spg7,Kif13b,Actr10,Spg11,Bloc1s6,Dtnbp1,Kif3c,Ift46,Rab21,Kif2a,Bloc1s2,K…
GO:1903146	regulation of mitophagy	7.27565e-05	-9.52839	44	26	0.00408998	6357	20933	2.26427e+132	Zbtb17,Map1lc3b,Srebf2,Wbp11,Hk2,Ambra1,U2af2,Tspo,Becn1,Gba,Atpif1,Csnk2a2,Bnip3l,Parl,Pink1,Fbxw7,Clec16a,Atg7,Fbxo7,Hif1a,Ruvbl1,Wdr75,Dnm1l,Vdac1,Tigar,Actl6a
GO:1901991	negative regulation of mitotic cell cycle phase transition	7.70298e-05	-9.47132	108	52	0.00817996	6357	20933	26951,269582,67941,107047,17120,20460,52679,22061,105377,77011,76454,12366,72611,12235,235041,17535,59036,68067,227331,13000,12237,56150,19891,80280,12649,26992,12450,19090,224023,234664,27354,56190,12905,208836,235559,14056,15574,11789,214498,69754,15468,83560,19356,14841,74996,70799,21749,22137,17246,234736,12236,105837	Zw10,Clspn,Rps27l,Psmg2,Mad1l1,Stil,E2f7,Trp63,Slf1,Ticrr,Fbxo31,Casp2,Zfp655,Bub1,Kank2,Mre11a,Dact1,Mrnip,Gigyf2,Csnk2a2,Bub3,Mad2l1,Rpa2,Cdk5rap3,Chek1,Brd7,Ccng1,Prkdc,Klhl22,Nae1,Nbn,Rbm38,Cradd,Fanci,Topbp1,Ezh2,Hus1,Apc,Cdc73,Fbxo7,Prmt2,Tex14,Rad17,Gsg2,Usp47,Cep192,Terf1,Ttk,Mdm2,Rfwd3,Bub1b,Mtbp
GO:0009451	RNA modification	7.70298e-05	-9.47132	108	52	0.00817996	6357	20933	68736,212728,224481,108943,74467,78890,56417,106338,68291,210529,17299,66663,233802,268420,60532,98956,69113,72133,271842,234728,67493,13434,72167,26383,66254,67667,74753,72085,74157,66628,66966,55989,72026,15278,72181,75686,100609,382137,69865,68916,67134,66185,67390,70153,68147,14911,116940,68205,217038,76357,72416,69606	Tyw5,Tarbp1,Tfb1m,Trmt10a,Pus10,Trmt44,Adar,Nsun3,Mto1,Mettl14,Mettl1,Uba5,Thumpd1,Alkbh5,Wtap,Nat10,Alkbh3,Trub1,Rpusd2,Cmtr2,Mettl16,Trdmt1,Thumpd2,Fto,Dimt1,Alkbh8,Trmo,Osgepl1,Cmtr1,Thg1l,Trit1,Nop58,Trmu,Tfb2m,Nsun4,Nudt16,Nsun5,Fdxacb1,A1cf,Cdkal1,Nop56,1110037F02Rik,Rnmtl1,2210016F16Rik,Gar1,Thumpd3,Tgs1,Urm1,Mrm1,Trmt5,Lrpprc,Mtfmt
GO:0032880	regulation of protein localization	7.80716e-05	-9.45788	974	350	0.0550574	6357	20933	19684,72322,12464,20583,27967,22642,70456,20788,14362,18767,433759,67151,18198,72400,22350,140499,14694,72017,59036,27078,69581,234740,15185,20319,16392,18763,320051,66691,381038,11554,66632,11502,78808,55988,16568,22234,14084,13418,19055,24088,227753,18294,107823,22339,19246,545156,93692,94185,13175,64384,12163,66810,11793,11865,223527,53886,232748,29809,13640,18016,19726,54725,216440,30877,2691…	Rdx,Xpo5,Cct4,Snai2,Cherp,Zbtb17,Mpc2,Srebf2,Fzd1,Pkia,Hdac1,Psmd9,Musk,Pinx1,Ezr,Ube2j2,Rack1,Cyb5r1,Dact1,B9d1,Rhou,Tmem231,Hdac6,Sfrp2,Isl1,Pkd1,Exph5,Gapvd1,Parl,Adrb1,Dph6,Adam9,Stxbp5,Snx12,Kif3a,Ugcg,Faf1,Dnajc1,Ppp3ca,Tlr2,Gsn,Ogg1,Whsc1,Vegfa,Ptpn1,Kalrn,Glrx,Tnfrsf21,Dclk1,Sirt3,Bmp8a,Rbm22,Atg5,Arntl,Eny2,Cdkl2,Tcaf2,Rabgap1l,Efna5,Nf2,Rfx3,Cadm1,Os9,Gnl3,H2afy,Egfr,Clock,Cacna1e,Dnm1l…
GO:0000460	maturation of 5.8S rRNA	7.98283e-05	-9.43563	33	21	0.00330345	6357	20933	6.63622e+107	Exosc3,Npm1,Bop1,Rcl1,Eri2,Exosc4,Exosc7,Wdr37,Las1l,Pes1,Eri3,Exosc8,Eri1,Exosc9,Abt1,Rpf1,Rrs1,Rrp15,Mphosph6,C1d,Exosc10
GO:0039694	viral RNA genome replication	8.19545e-05	-9.40935	13	11	0.00173038	6357	20933	1.17933e+58	Atg5,Rab5a,Atg7,Atg16l1,Atg16l2,Rock2,Eea1,Pi4ka,Pcbp2,Smarcb1,Rab29
GO:0039703	RNA replication	8.19545e-05	-9.40935	13	11	0.00173038	6357	20933	2.26422e+58	Rab29,Eea1,Smarcb1,Pcbp2,Pi4ka,Rock2,Atg16l1,Atg16l2,Atg7,Rab5a,Atg5
GO:0044419	interspecies interaction between organisms	8.42788e-05	-9.38138	191	83	0.0130565	6357	20933	12390,68576,19288,66201,20520,271457,20683,16476,14265,18521,12389,110355,78610,226422,58203,12454,230738,66700,75778,67955,20586,24088,321006,17257,21355,67231,27103,216238,433759,76959,50873,67064,66231,13858,240255,21454,328572,73711,20823,98415,72543,13830,107829,18571,16410,238722,58235,13669,270096,56491,72949,19878,229900,11836,26965,13030,12121,223691,68441,19062,14775,22278,66354,18563,1…	Cav2,Lamtor5,Ptx3,Vta1,Slc22a5,Rab5a,Sp1,Jun,Fmr1,Pcbp2,Cav1,Grk2,Uvrag,Rab29,Zbp1,Ccnk,Zc3h12a,Chmp3,Them4,Sugt1,Smarca4,Tlr2,Vprbp,Mecp2,Tap2,Tbc1d20,Eif2ak4,Eea1,Hdac1,Chmp5,Park2,Chmp1b,Thoc7,Eps15,Ythdc2,Tcp1,Ep300,Mvb12a,Ssb,Nucks1,Mvb12b,Stom,Thoc5,Pdcd6ip,Itgav,Zfp72,Nectin1,Eif3a,Mon1b,Vapb,Ccnt2,Rock2,Gbp7,Araf,Cul1,Ctsb,Bicd1,Eif3l,Rraga,Inpp5k,Gpx1,Usf1,Snw1,Pcx,Ppib,Smarcb1,Tsg101,Hc…
GO:0007041	lysosomal transport	8.4516e-05	-9.37857	68	36	0.00566305	6357	20933	7.67427e+187	Snx27,Snx16,Tgfbrap1,Sorl1,Ankfy1,Scarb2,Ap1g1,Sort1,Dennd3,Gak,Vps33a,Rbsn,Pink1,Lamp1,Stx8,Chmp3,Atg14,Ncoa4,Chmp5,Aktip,Park2,Tsg101,Vps51,Tmem106b,Vps53,Als2,Zfyve16,Snapin,Vps4b,Vps39,Rhob,Hgs,Gcc2,Fam160a2,Hgsnat,Lyst
GO:0031400	negative regulation of protein modification process	8.68391e-05	-9.35145	517	197	0.0309895	6357	20933	93759,230908,24071,13380,19822,237107,18519,16885,69237,246179,16337,329659,11910,15505,56417,20901,108909,20821,17765,80280,98403,18148,215748,14063,63953,13433,13492,24063,14013,19017,396184,18230,333433,216028,70012,76857,69754,68833,12402,19720,16973,18218,108099,22627,319476,226591,23892,67916,12257,20597,67490,80750,232339,13197,50873,101490,67702,52615,24066,19878,13405,19164,19255,17973,2…	Sirt1,Tardbp,Synj2bp,Dkk1,Rnf4,Gnl3l,Kat2b,Limk1,Gtpbp4,Fktn,Insr,E130311K13Rik,Atf3,Hsph1,Adar,Strap,Aida,Trim21,Mtf2,Cdk5rap3,Zfp451,Npm1,Cnksr3,F2rl1,Dusp10,Dnmt1,Drd5,Spry1,Mecom,Ppargc1a,Flrt1,Nxn,Gpd1l,Lrrtm3,Cep85,Spopl,Fbxo7,Pdcl3,Cbl,Trim27,Lrp5,Dusp8,Prkag2,Ywhae,Lrtm1,Tiprl,Grem1,Plpp3,Tspo,Smpd1,Ufl1,N4bp1,Ankrd26,Gadd45a,Park2,Inpp5f,Rnf149,Suz12,Spry4,Rock2,Dmd,Psen1,Ptpn2,Nck1,Cblb…
GO:0006890	retrograde vesicle-mediated transport, Golgi to ER	8.91034e-05	-9.32571	31	20	0.00314614	6357	20933	7.86107e+106	Uvrag,Golph3,Arcn1,Scyl1,Atp9b,Cog3,Copb1,Stx18,Rab6b,Lman2,Dnajc28,Arf3,Golph3l,Gbf1,Scfd1,Cog7,Nbas,Rab6a,Copb2,Arf4
GO:0044772	mitotic cell cycle phase transition	9.22241e-05	-9.29129	119	56	0.00880919	6357	20933	12649,67655,217232,69581,20620,21987,50850,18795,12314,319651,102423,12447,78832,12532,12428,16412,72508,17420,11477,52679,77035,105513,72391,225182,50496,22687,228714,12530,66197,76499,59046,67121,12236,13559,68193,12566,54394,12313,244879,12580,448987,19055,13684,24075,11789,50523,108058,12323,67974,12315,12013,70891,15904,319944,211134,100088	Chek1,Ctdp1,Cdc27,Rhou,Plk2,Tpd52l1,Spast,Plcb1,Calm2,Usp37,Hinfp,Ccne1,Cacul1,Cdc25c,Ccna2,Itgb1,Rps6kb1,Mnat1,Acvr1,E2f7,Kdm8,Chmp7,Cdkn3,Rbbp8,E2f6,Zpr1,Csrp2bp,Cdc25a,Cks2,Clasp2,Arpp19,Mastl,Bub1b,E2f5,Rpl24,Cdk2,Crlf3,Calm1,Npat,Cdkn2c,Fbxl7,Ppp3ca,Eif4e,Taf10,Apc,Lats2,Camk2d,Camk2b,Ccny,Calm3,Bach1,Spdya,Id4,Taf2,Lzts1,Rcc1
GO:0051174	regulation of phosphorus metabolic process	9.4373e-05	-9.26826	1606	555	0.0873053	6357	20933	14916,12454,16981,59046,230126,66385,18386,14056,11516,66148,69726,108960,12652,142980,20187,109294,52521,53323,66208,105787,30957,13405,53322,12778,227210,24066,67702,30878,217031,18477,60505,20460,12257,18712,23892,226591,18563,22627,14186,16973,228026,16591,80752,20655,22788,22359,17240,108058,382030,26382,16195,13492,18011,26395,13666,192656,66849,108909,329679,20901,67299,69085,329659,16412,…	Guca2b,Ccnk,Lrrn3,Arpp19,Shb,Ppp1r7,Oprd1,Ezh2,Adcyap1,Dnajc15,Smyd3,Irak2,Chga,Tlr3,Ryk,Prex2,Zfp622,Ube2k,Nenf,Prkaa1,Mapk8ip3,Dmd,Nucb2,Ackr3,Ccnyl1,Spry4,Rnf149,Apln,Tada2a,Prdx1,Il21,Stil,Tspo,Pim1,Grem1,Tiprl,Pcx,Ywhae,Fgfr4,Lrp5,Pdk1,Kl,Fam20c,Sod1,Zp3,Vldlr,Mdfi,Camk2d,Cnep1r1,Fgd2,Il6st,Drd5,Neurl1a,Map2k1,Eif2ak3,Ripk2,Ppp1r2,Aida,Fnip2,Strap,Dock7,Zcchc9,E130311K13Rik,Itgb1,Myo1d,Dkk1,…
GO:0044403	symbiosis, encompassing mutualism through parasitism	9.89459e-05	-9.22094	189	82	0.0128992	6357	20933	20520,19288,66201,68576,12390,14265,16476,20683,271457,12454,78610,226422,58203,18521,12389,110355,67231,27103,21355,24088,321006,230738,67955,66700,20586,75778,50873,67064,66231,13858,433759,76959,216238,13830,72543,107829,98415,73711,20823,240255,21454,328572,270096,13669,238722,58235,18571,16410,11836,72949,229900,19878,56491,26965,13030,12121,223691,68441,18563,66354,14775,22278,19062,15161,7…	Slc22a5,Ptx3,Vta1,Lamtor5,Cav2,Fmr1,Jun,Sp1,Rab5a,Ccnk,Uvrag,Rab29,Zbp1,Pcbp2,Cav1,Grk2,Tbc1d20,Eif2ak4,Tap2,Tlr2,Vprbp,Zc3h12a,Sugt1,Chmp3,Smarca4,Them4,Park2,Chmp1b,Thoc7,Eps15,Hdac1,Chmp5,Eea1,Stom,Mvb12b,Thoc5,Nucks1,Mvb12a,Ssb,Ythdc2,Tcp1,Ep300,Mon1b,Eif3a,Zfp72,Nectin1,Pdcd6ip,Itgav,Araf,Ccnt2,Gbp7,Rock2,Vapb,Cul1,Ctsb,Bicd1,Eif3l,Rraga,Pcx,Snw1,Gpx1,Usf1,Inpp5k,Hcfc1,Thoc3,Banf1,Tsg101,Ppi…
GO:0006644	phospholipid metabolic process	9.90536e-05	-9.21985	264	109	0.0171465	6357	20933	99712,242291,208449,22038,15450,321007,12660,319554,52123,212862,106861,70325,55980,23827,102247,19012,13026,52858,17257,71780,24057,433931,70316,225845,68971,12651,214932,665270,235044,101490,16592,103199,104015,66586,54673,20597,18704,668212,225326,56442,14178,19015,58994,74182,231510,78928,26889,18618,75320,18795,16329,74769,67556,110911,68680,66659,18711,268656,74302,14792,84095,67452,16331,6…	Cept1,Impad1,Sgms1,Plscr1,Lipc,Serac1,Chka,Idi1,Agpat5,Chpt1,Abhd3,Pigw,Impa1,Bpnt1,Gpat4,Plpp1,Pcyt1a,Cdipt,Mecp2,Isyna1,Sh3yl1,Pigg,Ndufab1,Pla2g16,Tamm41,Chkb,Cecr5,Plb1,Plppr2,Inpp5f,Fabp5,Fig4,Synj1,Crls1,Sh3glb1,Smpd1,Pik3c2a,Efr3b,Pik3c3,Serinc1,Fgf7,Ppard,Smpd3,Gpcpd1,Agpat9,Pigt,Cln8,Pemt,Etnk1,Plcb1,Inpp1,Pik3cb,Pigm,Cds2,Fitm1,Acp6,Pikfyve,Sptlc1,Mtmr3,Lpcat3,Pi4k2a,Pnpla8,Inpp5d,Pi4k2…
GO:0043968	histone H2A acetylation	0.000104032	-9.17081	15	12	0.00188768	6357	20933	1.38311e+60	Epc1,Trrap,Msl3l2,Ep400,Dmap1,Yeats4,Msl3,Ruvbl1,Meaf6,Morf4l1,Actl6a,Ing3
GO:0035384	thioester biosynthetic process	0.000104032	-9.17081	15	12	0.00188768	6357	20933	2.70077e+63	Gcdh,Acss2,Pdhb,Mpc2,Acacb,Pdhx,Acat1,Dld,Mpc1,Dlat,Mlycd,Pdha1
GO:0006999	nuclear pore organization	0.000104032	-9.17081	15	12	0.00188768	6357	20933	7.21242e+64	Seh1l,Nup153,Pom121,Ahctf1,Nup205,Ndc1,Nup107,Nup35,Tmem170,Rtn4,Tmem33,Nup54
GO:0071616	acyl-CoA biosynthetic process	0.000104032	-9.17081	15	12	0.00188768	6357	20933	5.59512e+63	Mpc1,Dlat,Dld,Acat1,Mlycd,Pdha1,Acacb,Pdhx,Mpc2,Pdhb,Acss2,Gcdh
GO:0008213	protein alkylation	0.00010416	-9.16958	109	52	0.00817996	6357	20933	213389,74322,102182,15182,73582,99890,77305,69726,14056,50709,73694,19346,104263,18537,140858,64707,207965,103136,239122,14852,238505,66310,240879,107823,17257,52690,331623,77683,15468,66317,226830,57295,433294,18193,224440,52615,214133,22083,109263,13626,27374,66083,50708,233904,30949,23808,76246,73419,213464,20230,69536,381022	Prdm9,Cxxc1,Prmt9,Hdac2,Camkmt,Prmt6,Wdr82,Smyd3,Ezh2,Hist1h1e,Ndufaf7,Rab6a,Kdm3a,Pcmt1,Wdr5,Suv39h2,Vcpkmt,Pwp1,Setdb2,Gspt1,Mtr,Dpy30,Mettl11b,Whsc1,Mecp2,Setd3,Bend3,Ehmt1,Prmt2,Wdr61,Smyd2,Icmt,Mettl21c,Nsd1,Setd4,Suz12,Tet2,Ctr9,Rlf,Eed,Prmt5,Setd6,Hist1h1c,Setd1a,Lcmt1,Ash2l,Rtf1,Armt1,Rbbp5,Satb1,Hemk1,Kmt2d
GO:0006479	protein methylation	0.00010416	-9.16958	109	52	0.00817996	6357	20933	207965,64707,140858,104263,18537,19346,73694,14056,50709,77305,69726,99890,73582,15182,102182,74322,213389,66317,77683,15468,331623,52690,107823,17257,240879,66310,14852,238505,239122,103136,66083,27374,13626,109263,22083,214133,52615,224440,18193,433294,57295,226830,381022,69536,213464,20230,73419,76246,23808,30949,233904,50708	Vcpkmt,Suv39h2,Wdr5,Kdm3a,Pcmt1,Rab6a,Ndufaf7,Ezh2,Hist1h1e,Wdr82,Smyd3,Prmt6,Camkmt,Hdac2,Prmt9,Cxxc1,Prdm9,Wdr61,Ehmt1,Prmt2,Bend3,Setd3,Whsc1,Mecp2,Mettl11b,Dpy30,Gspt1,Mtr,Setdb2,Pwp1,Setd6,Prmt5,Eed,Rlf,Ctr9,Tet2,Suz12,Setd4,Nsd1,Mettl21c,Icmt,Smyd2,Kmt2d,Hemk1,Rbbp5,Satb1,Armt1,Rtf1,Ash2l,Lcmt1,Setd1a,Hist1h1c
GO:0070936	protein K48-linked ubiquitination	0.000104447	-9.16683	47	27	0.00424729	6357	20933	7.41328e+140	Rnf6,Rnf34,Park2,Rffl,Hace1,Rnf4,Nedd4l,Ttc3,Ube2k,Ube3a,Rnf8,Ube2q2,Ube2e3,Ube2e1,Ube2e2,Ube2d2a,Rnf146,Ube2g1,Peli1,Amfr,Tnfaip3,March6,Rnf187,Ube2h,Ube2d1,Itch,Bfar
GO:0051784	negative regulation of nuclear division	0.000104447	-9.16683	47	27	0.00424729	6357	20933	2.24023e+139	Klhl22,Tnks,Zw10,Psmg2,Stil,Tom1l1,Mad1l1,Bmp7,Apc,Mos,Tex14,Msh2,Bub1,Rps6ka2,Nanos2,Terf1,Ttk,Cep192,Bub3,Csnk2a2,Bub1b,Mad2l1,Esr1,Rad1,Mtbp,Chek1,Tom1l2
GO:0034440	lipid oxidation	0.000104833	-9.16315	71	37	0.00582036	6357	20933	1.1046e+193	Acat2,Gcdh,Abcd3,Pex5,Hsd17b4,Etfa,Pparg,Prkaa1,Hibch,Ppard,Acad8,Acat1,Acadm,Pex7,Acad10,Acad9,Mlycd,Mapk14,Hadh,Pex2,Cyp4v3,Acaa2,Etfdh,Acadl,Eci2,Acoxl,Echs1,Por,Auh,Acadsb,Cd36,Hadhb,Abcd2,Slc25a17,Eci1,Crot,Ivd
GO:0000959	mitochondrial RNA metabolic process	0.000107555	-9.13751	27	18	0.00283152	6357	20933	7.17017e+93	Pnpt1,Mterf3,Trmt5,Trmt10c,Trmu,Mterf1b,Mterf1a,Ppargc1b,Tars2,Yars2,Elac2,Mterf4,Tfb2m,Tfam,Supv3l1,Mto1,Mterf2,Tefm
GO:0072524	pyridine-containing compound metabolic process	0.000109866	-9.11625	104	50	0.00786535	6357	20933	100198,18293,55951,333433,19895,110208,13807,17448,16832,14555,11674,74637,15277,21351,66454,72141,57028,78920,235339,18597,192185,107766,18655,70456,12183,68263,433182,67834,170718,66646,216134,59027,17449,56012,18115,18648,13382,74080,15929,27402,21881,14149,266690,14571,18746,230163,68646,14751,14148,18641	H6pd,Ogdh,Mpc1,Gpd1l,Rpia,Pgd,Eno2,Mdh2,Ldhb,Gpd1,Aldoa,Shpk,Hk2,Taldo1,Nmnat1,Adpgk,Pdxp,Dlst,Dlat,Pdha1,Nadk,Haao,Pgk1,Mpc2,Bpgm,Pdhb,Eno1b,Idh3a,Idh3b,Rpe,Pdxk,Nampt,Mdh1,Pgam2,Nnt,Pgam1,Dld,Nmnat3,Idh3g,Pdhx,Tkt,Fdxr,Cyb5r4,Gpd2,Pkm,Aldob,Nadk2,Gpi1,Fdx1,Pfkl
GO:0019362	pyridine nucleotide metabolic process	0.000115189	-9.06894	99	48	0.00755073	6357	20933	66454,72141,21351,78920,110208,19895,18293,100198,333433,55951,15277,74637,17448,16832,13807,11674,14555,21881,27402,266690,14149,18115,18648,15929,74080,13382,14751,14148,18641,18746,14571,68646,230163,18655,12183,70456,107766,192185,18597,235339,17449,59027,56012,67834,170718,68263,433182,66646	Nmnat1,Adpgk,Taldo1,Dlst,Pgd,Rpia,Ogdh,H6pd,Gpd1l,Mpc1,Hk2,Shpk,Mdh2,Ldhb,Eno2,Aldoa,Gpd1,Tkt,Pdhx,Cyb5r4,Fdxr,Nnt,Pgam1,Idh3g,Nmnat3,Dld,Gpi1,Fdx1,Pfkl,Pkm,Gpd2,Nadk2,Aldob,Pgk1,Bpgm,Mpc2,Haao,Nadk,Pdha1,Dlat,Mdh1,Nampt,Pgam2,Idh3a,Idh3b,Pdhb,Eno1b,Rpe
GO:1902100	negative regulation of metaphase/anaphase transition of cell cycle	0.000115685	-9.06464	25	17	0.00267422	6357	20933	1.22352e+87	Bub1,Mos,Tex14,Mtbp,Bub1b,Mad2l1,Csnk2a2,Bub3,Cep192,Ttk,Terf1,Mad1l1,Stil,Psmg2,Zw10,Klhl22,Apc
GO:0048741	skeletal muscle fiber development	0.000115685	-9.06464	25	17	0.00267422	6357	20933	7.23301e+88	Klhl40,Cacna1s,Ski,Smo,Cav2,Homer1,Acta1,Klhl41,Fam65b,Stac3,Myog,Rcan1,Xk,Ryr1,Gpx1,Nfatc3,Ppp3ca
GO:0007519	skeletal muscle tissue development	0.000115725	-9.06429	133	61	0.00959572	6357	20933	70417,215031,17261,26443,74182,208258,114142,228019,72949,11910,13405,18741,56758,65256,18021,17295,108655,244923,72330,26556,30928,20481,17878,53318,56642,328572,17928,12224,54720,56198,66354,56771,22439,56504,12389,77578,14775,20190,57810,17260,224640,13813,11819,380664,19055,12848,18740,12292,12390,319757,12922,26416,71960,11459,17684,237611,193385,228003,217082,14236,14281	Megf10,Vgll2,Mef2d,Psma6,Gpcpd1,Ankrd33,Foxp2,Mettl8,Ccnt2,Atf3,Dmd,Pitx2,Mbnl1,Asb2,Nfatc3,Met,Foxp1,Klhl31,Klhl40,Homer1,Zbtb18,Ski,Myf6,Pdlim3,Ankrd2,Ep300,Myog,Klf5,Rcan1,Heyl,Snw1,Med20,Xk,Srpk3,Cav1,Bcl9,Gpx1,Ryr1,Cdon,Mef2c,Lemd2,Eomes,Nr2f2,Lemd3,Ppp3ca,Cops2,Pitx1,Cacna1s,Cav2,Smo,Crhr2,Mapk14,Myh14,Acta1,Cited2,Stac3,Fam65b,Klhl41,Hlf,Foxn2,Fos
GO:0060538	skeletal muscle organ development	0.000116238	-9.05987	141	64	0.0100676	6357	20933	18021,11910,228019,208258,26443,17261,70417,56198,16795,17928,53318,68897,77578,14775,20190,57810,66354,22439,56504,228003,14281,237611,71960,26416,18740,12292,56758,65256,18741,13405,114142,72949,74182,215031,328572,12224,54720,12804,17878,56642,30928,20481,26556,72330,17295,108655,244923,380664,19055,12848,11819,17260,13813,224640,12389,56771,14236,217082,193385,17684,11459,12922,12390,319757	Nfatc3,Atf3,Mettl8,Ankrd33,Psma6,Mef2d,Megf10,Heyl,Large1,Myog,Pdlim3,Disp1,Bcl9,Gpx1,Ryr1,Cdon,Snw1,Xk,Srpk3,Klhl41,Fos,Stac3,Myh14,Mapk14,Pitx1,Cacna1s,Mbnl1,Asb2,Pitx2,Dmd,Foxp2,Ccnt2,Gpcpd1,Vgll2,Ep300,Klf5,Rcan1,Cntfr,Myf6,Ankrd2,Zbtb18,Ski,Homer1,Klhl40,Met,Foxp1,Klhl31,Lemd3,Ppp3ca,Cops2,Nr2f2,Mef2c,Eomes,Lemd2,Cav1,Med20,Foxn2,Hlf,Fam65b,Cited2,Acta1,Crhr2,Cav2,Smo
GO:0006895	Golgi to endosome transport	0.000118002	-9.04481	17	13	0.00204499	6357	20933	7.00282e+69	Dopey2,Sort1,Klhl20,Tgoln2,Kif16b,Ap1ar,Sys1,Gbf1,Eps15,Slc30a6,Rab14,Rab29,Rbsn
GO:2000641	regulation of early endosome to late endosome transport	0.000118002	-9.04481	17	13	0.00204499	6357	20933	2.07792e+67	Src,Dnajc13,Map2k1,Snx3,Ezr,Mapk1,Chmp3,Rdx,Rab21,Dab2,Mtmr2,Ptpn23,Snx12
GO:0019079	viral genome replication	0.000118002	-9.04481	17	13	0.00204499	6357	20933	7.70407e+69	Atg16l1,Atg16l2,Rock2,Atg5,Rab5a,Atg7,Rab29,Lamtor5,Eea1,Grk2,Pcbp2,Smarcb1,Pi4ka
GO:0006103	2-oxoglutarate metabolic process	0.000118002	-9.04481	17	13	0.00204499	6357	20933	2.08512e+67	Stat5b,Idh1,Idh3b,Idh3a,Kyat3,Mrps36,Dlst,Got2,Ogdh,Dld,Got1,Idh3g,Gpt2
GO:0017038	protein import	0.00011846	-9.04093	168	74	0.0116407	6357	20933	69482,107939,227699,13645,76582,66212,69597,18141,71844,30056,26413,19386,195236,320938,15519,19298,67669,16646,56417,233726,66169,110750,21856,108705,66449,20963,18969,68080,70699,19305,218210,66810,11865,21808,83946,16650,70572,18386,103737,238799,21854,19055,15525,258153,20742,234549,103468,16211,16476,74254,320727,19302,223513,240614,235442,18708,56535,67952,18634,227720,66069,12053,170762,67…	Nup35,Pom121,Nup188,Egf,Ipo11,Sec61b,Afg3l2,Nup50,Nupl1,Timm9,Mapk1,Ranbp2,Pom121l2,Tnpo3,Hsp90aa1,Pex19,Hikeshi,Kpna1,Adar,Ipo7,Tomm7,Cse1l,Timm44,Pttg1ip,Pam16,Syk,Pola2,Gpn3,Nup205,Pex5,Nup153,Rbm22,Arntl,Tgfb2,Phip,Kpna6,Ipo5,Oprd1,Pex12,Tnpo1,Timm17a,Ppp3ca,Hspa4,Olfr412,Sptbn1,Heatr3,Nup107,Kpnb1,Jun,Gpn1,Ipo8,Pex2,Abra,Ranbp6,Rab8b,Pik3r1,Pex3,Tomm20,Pex7,Nup214,Snupn,Bcl6,Nup155,Timm21,Zf…
GO:0000723	telomere maintenance	0.000120485	-9.02398	64	34	0.00534843	6357	20933	1.98912e+178	Rpa2,Pcna,Slx4,Rif1,Mre11a,Ercc4,Pinx1,Smg6,Ccne1,Smg1,Terf2ip,Fbxo4,Tep1,Tinf2,Brca2,Apex1,Smc6,Wrn,Terf1,Dclre1c,Tnks2,Xrn1,Hnrnpd,Pot1b,Xrcc6,Smc5,Xrcc5,Upf1,Rad51c,Dna2,Prkdc,Rtel1,Smg5,Nbn
GO:0000422	mitophagy	0.000122686	-9.00589	45	26	0.00408998	6357	20933	2.42557e+137	Atg4c,Atg4d,Hdac6,Pink1,Rb1cc1,Atg3,Atg12,Capn10,Map1lc3a,Atg7,Fbxo7,Atg13,Atg14,Tomm7,Map1lc3b,Wdr45,Cisd2,Atg2a,Wdr45b,Wipi2,Fundc2,Park2,Atg5,Fundc1,Ambra1,Becn1
GO:0061726	mitochondrion disassembly	0.000122686	-9.00589	45	26	0.00408998	6357	20933	5.08737e+137	Park2,Fundc2,Wipi2,Atg2a,Wdr45b,Cisd2,Wdr45,Map1lc3b,Becn1,Ambra1,Fundc1,Atg5,Atg3,Rb1cc1,Pink1,Hdac6,Atg4d,Atg4c,Tomm7,Atg14,Atg13,Atg12,Atg7,Capn10,Fbxo7,Map1lc3a
GO:0019220	regulation of phosphate metabolic process	0.000127702	-8.96581	1601	552	0.0868334	6357	20933	26904,243725,98496,114230,68197,12389,15467,17260,66917,241568,69131,15499,112405,67974,15259,15182,19091,53380,11977,14555,100037258,56398,74205,50501,16410,18795,67973,72949,217378,14219,252967,381921,236690,13445,114716,73086,20947,170826,19230,14178,11538,19650,170644,56013,14158,57810,17200,13383,16963,240354,19356,241035,13983,18125,21898,12954,18217,71943,26413,12021,11983,22032,52036,1523…	Sh2d1b1,Ppp1r9a,Pid1,Aipl1,Ndufc2,Cav1,Eif2ak1,Mef2c,Chordc1,Lrrc4c,Cdk12,Hsf1,Egln1,Ccny,Hipk3,Hdac2,Prkg1,Psmd10,Atp7a,Gpd1,Dnajc3,Chp1,Acsl3,Prok2,Itgav,Plcb1,Mphosph10,Ccnt2,Dnajc27,Ctgf,Ropn1l,Taok2,Nyx,Cdk2ap1,Spred2,Rps6ka5,Swap70,Ppargc1b,Twf1,Fgf7,Adnp,Rbl1,Ubn1,Srcin1,Fer,Cdon,Mc2r,Dlg1,Xcl1,Malt1,Rad17,Pkhd1,Esr2,Nos1,Tlr4,Cryaa,Ntsr2,Tom1l1,Mapk1,Bard1,Atpif1,Traf4,Ppp6r3,Hgs,Ppp5c,Ed…
GO:0051297	centrosome organization	0.000127789	-8.96513	74	38	0.00597766	6357	20933	1.98782e+201	Rock2,Haus6,Ppp1r12a,Haus5,Bbs4,Ndel1,Npm1,Sgol1,Arl2,Haus2,Slc16a1,Stil,Cep72,Xrcc2,Tubgcp3,Brca2,Cep250,Gadd45a,Haus1,Cep135,Cep68,Haus7,Haus4,Cdk2,Uvrag,Sass6,Bnip2,Cenpj,Tubgcp5,Cep192,Cep152,Kif11,Ssx2ip,Cdk5rap2,Chd3,Cntln,Ckap5,Kif3a
GO:0045839	negative regulation of mitotic nuclear division	0.000130186	-8.94655	36	22	0.00346075	6357	20933	1.07047e+113	Psmg2,Tnks,Zw10,Klhl22,Mad1l1,Stil,Tom1l1,Bmp7,Apc,Bub1,Tex14,Csnk2a2,Bub3,Cep192,Terf1,Ttk,Tom1l2,Mtbp,Chek1,Esr1,Mad2l1,Bub1b
GO:0009259	ribonucleotide metabolic process	0.000137061	-8.89508	263	108	0.0169891	6357	20933	66218,14751,18573,68550,18746,230163,12064,11717,18575,114640,18648,110446,67273,13382,56409,12862,18102,433182,17434,16434,14923,15254,67264,66052,14297,18578,18655,78038,12183,12868,67126,12861,66152,80752,210044,211347,22273,20617,11964,66725,26430,23959,11975,11637,23971,15277,12850,74167,12858,13807,407785,11564,207728,74450,28080,50799,12869,229363,51797,18641,22247,11949,21871,66416,11966,…	Ndufb9,Gpi1,Pde1a,Tefm,Pkm,Aldob,Bdnf,Ampd3,Pde1c,Pth2,Pgam1,Acat1,Ndufa10,Dld,Nudt3,Cox6a2,Nme1,Eno1b,Mocs2,Itpa,Guk1,Hint1,Ndufb8,Sdhc,Fxn,Pde4b,Pgk1,Mccc2,Bpgm,Cox8a,Atp5e,Cox6a1,Uqcr10,Fam20c,Adcy2,Pank3,Uqcrc1,Snca,Atp6v1a,Lrrk2,Parg,Nt5e,Atp6v0a1,Ak2,Papss1,Hk2,Coq7,Nudt9,Cox5a,Eno2,Ndufs6,Adsl,Pde2a,Pank2,Atp5o,Slc25a13,Cox8b,Gmps,Ctps,Pfkl,Umps,Atp5c1,Atp6v0a2,Ndufa7,Atp6v1b2,Uqcrq,Entpd4…
GO:0009790	embryo development	0.000141121	-8.86589	1066	378	0.059462	6357	20933	57810,13383,11695,56790,240641,23872,16561,13435,12946,13804,270685,211064,20336,72999,218490,244058,21679,16206,26413,12954,16348,26564,109934,12850,13382,106522,78912,15228,50776,67888,17127,19089,330409,235497,17300,14048,381695,20587,27494,30838,11481,21808,20350,11477,74143,18194,71876,11835,239719,233826,66055,17128,243931,15258,74778,544696,269275,209456,17260,68151,50523,15182,433693,1549…	Cdon,Dlg1,Alx4,Supt20,Kif20b,Ets2,Kif1b,Dnmt3a,Cr1l,Endog,Mthfd1l,Alkbh1,Exoc4,Insig2,Btf3,Rgma,Tead4,Lrig1,Mapk1,Cryaa,Invs,Ror2,Abr,Coq7,Dld,Pkdcc,Sp2,Foxg1,Polg2,Tmem100,Smad3,Prkcsh,Cecr2,Leo1,Foxc1,Eya1,N4bp2l2,Smarcb1,Amot,Fbxw4,Acvr2b,Tgfb2,Sema3f,Acvr1,Opa1,Nsdhl,Cenpu,Ar,Mkl2,Palb2,Sf3b6,Smad4,Tshz3,Hipk2,Rrp7a,Tbc1d32,Acvr1c,Trp53bp2,Mef2c,Wls,Lats2,Hdac2,Akirin2,Hsf1,Egln1,Eif4e2,Slc8a…
GO:0006261	DNA-dependent DNA replication	0.000143455	-8.84949	92	45	0.00707881	6357	20933	69263,21974,104806,12545,117599,19819,237877,26428,77782,72749,22427,18975,19704,17219,327762,269400,19290,69270,320209,69928,272158,19076,18974,212377,54380,106344,665775,235559,12447,109145,382985,225160,18538,50755,20492,98415,26429,18969,67967,12190,19718,22687,56452,66131,105377	Rfc3,Top2b,Fancm,Cdc7,Helb,Rnaseh1,Atad5,Orc4,Polq,Tonsl,Wrn,Polg,Upf1,Mcm6,Dna2,Rtel1,Pura,Gins1,Ddx11,Apitd1,Poln,Prim2,Pole2,Mms22l,Smarcal1,Rfc4,Bod1l,Topbp1,Ccne1,Gins4,Rrm2b,Thoc1,Pcna,Fbxo18,Slbp,Nucks1,Orc5,Pola2,Pold3,Brca2,Rfc2,Zpr1,Orc6,Tipin,Slf1
GO:0008610	lipid biosynthetic process	0.00014699	-8.82514	404	157	0.0246972	6357	20933	56348,71147,241447,231510,70757,74205,241113,72017,30963,13614,225845,68971,26378,12651,214932,22428,14245,66586,18704,56442,14178,15490,19012,13026,52858,68393,433931,14712,56386,16993,70316,13595,99712,60527,22234,22038,15450,321007,19223,56690,52123,212862,211666,22239,102247,17918,74596,77626,20441,17117,54613,216739,71949,74451,18194,60525,15483,19305,108097,13244,67164,67420,14137,320951,11…	Hsd17b12,Oxsm,Cers6,Agpat9,Hacd2,Acsl3,Prkag3,Cyb5r1,Hacd1,Edn1,Pla2g16,Tamm41,Decr2,Chkb,Cecr5,Dctn6,Lpin1,Crls1,Pik3c2a,Serinc1,Fgf7,Hsd17b7,Plpp1,Pcyt1a,Cdipt,Mogat1,Pigg,Gnpat,B4galt6,Lta4h,Ndufab1,Ebp,Cept1,Fads3,Ugcg,Plscr1,Lipc,Serac1,Ptgis,Mlycd,Agpat5,Chpt1,Mgst2,Ugt8a,Gpat4,Myo5a,Cds1,Smpd4,St3gal3,Amacr,St3gal6,Acsl6,Cers5,Pgs1,Nsdhl,Acss2,Hsd11b1,Pex5,Prkab2,Degs1,Lipt2,Far1,Fdft1,Pis…
GO:0051783	regulation of nuclear division	0.000148699	-8.81358	169	74	0.0116407	6357	20933	12235,105988,103733,18795,13614,77744,20112,107995,67052,13000,18763,12649,56150,230861,217232,12537,107047,26951,56208,20460,17120,67064,76959,17295,17685,327799,22137,213582,216810,68549,12236,19355,229776,16551,235661,100088,12162,12323,59126,11789,213389,26914,378430,16337,20479,12237,22629,30949,17345,13982,68942,21951,74201,105377,83946,226151,13645,16973,17451,83560,52563,70012,21749,52206…	Bub1,Espl1,Tubg1,Plcb1,Edn1,Bora,Rps6ka2,Cdc20,Ndc80,Csnk2a2,Pkd1,Chek1,Mad2l1,Eif4g3,Cdc27,Cdk11b,Psmg2,Zw10,Becn1,Stil,Mad1l1,Chmp1b,Chmp5,Met,Msh2,Usp44,Ttk,Map9,Tom1l2,Sgol2a,Bub1b,Rad1,Cdc14a,Kif11,Dync1li1,Rcc1,Bmp7,Camk2b,Nek6,Apc,Prdm9,H2afy,Nanos2,Insr,Vps4b,Bub3,Ywhah,Lcmt1,Mki67,Esr1,Chmp2b,Tnks,Cep97,Slf1,Phip,Fam178a,Egf,Lrp5,Mos,Tex14,Cdc23,Cep85,Terf1,Anapc4,Cep192,Mtbp,Kif20b,Pdxp…
GO:0031062	positive regulation of histone methylation	0.000149101	-8.81088	34	21	0.00330345	6357	20933	7.40165e+107	Phf19,Tet1,Snw1,Smad4,L3mbtl2,Mtf2,Rtf1,Nelfa,Wdr61,Jarid2,Mecp2,Paxip1,Auts2,Asxl2,Rnf20,Xbp1,Dnmt1,Ctr9,Sirt1,Paxbp1,Eed
GO:0016311	dephosphorylation	0.000150495	-8.80158	202	86	0.0135284	6357	20933	225283,67655,219024,14050,218294,19060,240892,12532,72930,76987,382051,72519,80915,14048,67857,545622,435391,237860,83493,18218,53332,57028,77116,20975,19062,19244,67916,114663,19262,19249,19042,19270,219135,19248,74302,319520,16331,13853,67311,63953,14051,71910,14208,19043,320024,218232,19243,12531,19273,72102,11431,56291,16329,19255,17931,17973,101490,235044,19267,104015,72391,19046,12530,12234…	Rprd1a,Ctdp1,Tmem55b,Eya3,Cdc14b,Ppp5c,Dusp27,Cdc25c,Ppp2r2b,Hdhd2,Pdp2,Tmem55a,Dusp12,Eya1,Ppp6c,Ptpn3,Dupd1,Ssh2,Sacm1l,Dusp8,Mtmr1,Pdxp,Mtmr2,Synj2,Inpp5k,Ptp4a2,Plpp3,Impa2,Ptpra,Ptpn13,Ppm1a,Ptprg,Mtmr6,Ptpn12,Mtmr3,Dusp4,Inpp5d,Epm2a,Nanp,Dusp10,Eya4,Plpp5,Ppm1g,Ppm1b,Nceh1,Ptpdc1,Ptp4a1,Cdc25b,Ptpru,Dusp11,Acp1,Styx,Inpp1,Ptpn2,Ppp1r12a,Nck1,Inpp5f,Plppr2,Ptpre,Synj1,Cdkn3,Ppp1cb,Cdc25a,Bt…
GO:0032502	developmental process	0.000158503	-8.74974	5195	1682	0.26459	6357	20933	20583,208727,76454,80707,192157,68083,16716,71900,26383,320772,14254,12168,210529,16392,67451,116904,18198,321008,223593,27428,230484,235402,13872,18293,81004,230796,22240,11554,140740,20851,57753,56297,69605,13559,22339,56048,68196,12912,21974,21685,224640,214899,17257,72475,19325,66999,18738,12369,11658,19735,54725,73689,19016,54422,19305,231413,76829,242584,14225,381760,218772,100986,16438,100…	Snai2,Hdac4,Fbxo31,Wwox,Socs7,Pak1ip1,Ky,Tmem106b,Fto,Mdga2,Flt1,Bmpr2,Mettl14,Isl1,Pkp2,Alpk3,Musk,6330408A02Rik,Washc5,Shroom3,Usp1,Lingo1,Ercc3,Ogdh,Tbl1xr1,Wdtc1,Dpysl3,Adrb1,Sec63,Stat5b,Noc3l,Arl6,Lnpk,E2f5,Vegfa,Lgals8,Hsbp1,Creb1,Top2b,Tef,Lemd2,Kdm5a,Mecp2,Ssbp3,Rab10,Med28,Pitpna,Casp7,Alcam,Rgs2,Cadm1,Bloc1s2,Pparg,Barhl1,Pex5,Grsf1,Dok5,Wdr78,Fkbp1a,Ssbp1,Rarb,Akap9,Itpr1,Papd4,Ndufs4…
GO:0006120	mitochondrial electron transport, NADH to ubiquinone	0.000159067	-8.74618	10	9	0.00141576	6357	20933	6.62187e+45	Ndufb9,Ndufv2,Ndufb8,Ndufs6,Ndufa7,Bdnf,Ndufc2,Dld,Ndufa10
GO:0014902	myotube differentiation	0.000159966	-8.74055	55	30	0.00471921	6357	20933	3.09632e+153	Hacd1,Pitx2,Nfatc2,Dmd,Dyrk1b,Nfatc3,Ppp3ca,Xk,Bcl9,Gpx1,Cdon,Ryr1,Sort1,Acta1,Tanc1,Myog,Stac3,Rcan1,Fam65b,Klhl41,Met,Cacna1s,Klhl40,Cav2,Smo,Neo1,Smyd3,Homer1,Barx2,Ski
GO:0051338	regulation of transferase activity	0.000163959	-8.71589	758	276	0.0434167	6357	20933	11727,21898,71943,26564,237542,26413,14828,19106,108097,56013,13383,240354,20617,21808,78832,11481,54324,77781,108679,66412,28113,19718,106504,17165,234729,94275,67468,93765,22032,15239,11789,15259,67974,50523,78600,53380,70891,243725,237847,12389,66917,69131,241568,17295,13132,381921,114716,236690,11538,19650,56398,100037258,66671,50501,72949,21929,26399,319955,227693,27220,19386,24063,396184,27…	Ang,Tlr4,Tom1l1,Ror2,Osbpl8,Mapk1,Hspa5,Eif2ak2,Prkab2,Srcin1,Dlg1,Malt1,Snca,Tgfb2,Cacul1,Acvr2b,Arhgef5,Epm2aip1,Cops8,Arrdc4,Tinf2,Rfc2,Stk38,Mapkapk5,Vac14,Maged1,Mmd,Ube2n,Traf4,Hgs,Apc,Hipk3,Ccny,Lats2,Pde6h,Psmd10,Spdya,Ppp1r9a,Rtn4rl1,Cav1,Chordc1,Cdk12,Lrrc4c,Met,Dab2,Taok2,Spred2,Nyx,Adnp,Rbl1,Chp1,Dnajc3,Ccnh,Prok2,Ccnt2,Tnfaip3,Map2k6,Ercc6,Zer1,Cartpt,Ranbp2,Spry1,Flrt1,Nbn,Prkag2,Pa…
GO:2000779	regulation of double-strand break repair	0.000168434	-8.68896	41	24	0.00377537	6357	20933	1.82942e+128	Ogg1,Klhl15,Whsc1,Mrnip,Nudt16,Twist1,Helb,Fignl1,Timeless,Kdm1a,Rpa2,Polq,Ppp4r2,Chek1,Fign,Fbxo18,Rif1,Rad51ap1,Kdm4d,Ddx11,Rtel1,Fam178a,Terf2ip,Slf1
GO:0033120	positive regulation of RNA splicing	0.000169831	-8.68071	32	20	0.00314614	6357	20933	2.21857e+104	U2af2,Rbm22,Zpr1,Snrnp70,Srsf1,Tra2a,Smn1,Hnrnpk,Khdrbs3,Pik3r1,Srsf5,Prpf19,Thrap3,Eif4a3,Zfp64,Snw1,Celf4,Rnf219,Rbm20,Hnrnpll
GO:1901988	negative regulation of cell cycle phase transition	0.000173227	-8.66091	116	54	0.00849457	6357	20933	68067,227331,235041,17535,59036,72611,12235,26914,80280,19891,12649,56150,13000,12237,52679,22061,17120,20460,67941,107047,26951,269582,76454,12366,77011,105377,14841,74996,19356,15468,69754,83560,17451,105837,234736,12236,17246,70799,22137,21749,208836,12905,27354,56190,12450,234664,19090,224023,26992,214498,15574,11789,14056,235559	Mrnip,Gigyf2,Kank2,Mre11a,Dact1,Zfp655,Bub1,H2afy,Cdk5rap3,Rpa2,Chek1,Mad2l1,Csnk2a2,Bub3,E2f7,Trp63,Mad1l1,Stil,Rps27l,Psmg2,Zw10,Clspn,Fbxo31,Casp2,Ticrr,Slf1,Gsg2,Usp47,Rad17,Prmt2,Fbxo7,Tex14,Mos,Mtbp,Rfwd3,Bub1b,Mdm2,Cep192,Ttk,Terf1,Fanci,Cradd,Nbn,Rbm38,Ccng1,Nae1,Prkdc,Klhl22,Brd7,Cdc73,Hus1,Apc,Ezh2,Topbp1
GO:0007517	muscle organ development	0.000173237	-8.66085	270	110	0.0173038	6357	20933	69852,17300,21808,15214,12166,22433,17928,21814,16795,56198,93759,17131,53318,67367,12955,17261,26443,94245,68016,208258,14225,70417,434246,18021,228019,11910,26416,71960,12292,18740,237611,24051,14281,228003,11695,15213,14775,20190,382639,13346,57810,77578,68927,22439,56504,22418,66354,68897,107589,21812,26556,18996,20481,30928,17425,244923,108655,17295,12651,14362,72330,14359,54720,12224,328572…	Tcf23,Foxc1,Tgfb2,Hey2,Bmpr1a,Xbp1,Myog,Tgfbr3,Large1,Heyl,Sirt1,Smad7,Pdlim3,Paxbp1,Cryab,Mef2d,Psma6,Dtnbp1,Murc,Ankrd33,Fkbp1a,Megf10,Trim72,Nfatc3,Mettl8,Atf3,Mapk14,Myh14,Cacna1s,Pitx1,Stac3,Sgcb,Fos,Klhl41,Alx4,Hey1,Gpx1,Ryr1,Zbtb42,Des,Cdon,Bcl9,Ptcd2,Xk,Srpk3,Wnt5a,Snw1,Disp1,Mylk,Tgfbr1,Homer1,Pou4f1,Ski,Zbtb18,Foxk1,Klhl31,Foxp1,Met,Chkb,Fzd1,Klhl40,Fxr1,Rcan1,Klf5,Ep300,Ankrd2,Cntfr,My…
GO:0044272	sulfur compound biosynthetic process	0.000177436	-8.6369	85	42	0.00660689	6357	20933	14854,79464,211666,72136,23971,29807,14043,56690,55951,58250,110175,15450,108156,58193,234356,67873,269378,238505,14629,67164,54616,100705,235534,212898,68263,76898,53374,270076,242585,60525,18597,232087,235339,70456,104923,107869,50787,78752,13382,110446,14651,27402	Gss,Lias,Mgst2,Chst14,Papss1,Tpk1,Ext2,Mlycd,Mpc1,Chst11,Ggct,Lipc,Mthfd1,Extl2,Csgalnact1,Mri1,Ahcy,Mtr,Gclc,Lipt2,Extl3,Acacb,Pxylp1,Dse,Pdhb,B3gat1,Chst3,Gcdh,Slc35d1,Acss2,Pdha1,Mat2a,Dlat,Mpc2,Adi1,Cth,Hs6st3,Csgalnact2,Dld,Acat1,Hagh,Pdhx
GO:0032200	telomere organization	0.000179365	-8.62609	65	34	0.00534843	6357	20933	3.27762e+178	Dna2,Rad51c,Upf1,Prkdc,Rtel1,Nbn,Smg5,Pot1b,Xrcc6,Xrcc5,Smc5,Xrn1,Tnks2,Hnrnpd,Smc6,Terf1,Wrn,Dclre1c,Tep1,Tinf2,Fbxo4,Brca2,Apex1,Terf2ip,Smg1,Mre11a,Pinx1,Ercc4,Smg6,Ccne1,Rpa2,Rif1,Pcna,Slx4
GO:0044767	single-organism developmental process	0.000181834	-8.61241	5150	1667	0.262231	6357	20933	104263,109305,226641,217351,66945,192170,77782,19821,21941,545156,15368,18294,11432,20692,11881,23938,20586,17308,71093,80857,17425,16661,54721,16600,218624,17527,14623,54720,654470,208647,320051,235180,20615,234740,15185,20319,26889,619289,22272,14694,319953,16401,232232,27078,207165,109145,14571,18472,13518,207728,12292,15387,18569,16331,100177,268697,23988,27008,21834,228662,56501,66354,17776,…	Kdm3a,Orai1,Atf6,Tnrc6c,Sdha,Eif4a3,Polq,Rnf2,Tnfrsf8,Kalrn,Hmox1,Ogg1,Acp2,Sparc,Arsb,Map2k5,Smarca4,Mgat1,Atoh8,Fgf20,Foxk1,Krt10,Tyk2,Klf4,Il31ra,Mpv17,Gjb6,Rcan1,Tctn1,Creb3l2,Exph5,Fez1,Snapin,Tmem231,Hdac6,Sfrp2,Cln8,Rfx8,Uqcrq,Rack1,Ttll1,Itga4,Hdac11,B9d1,Bptf,Gins4,Gpd2,Pafah1b1,Dst,Pde2a,Cacna1s,Hnrnpk,Pdcd4,Inpp5d,Zmym6,Ccnb1,Pin1,Micall1,Thrb,Btbd3,Elf4,Snw1,Mast2,Rab18,Phf19,Wrn,Ninj…
GO:0032869	cellular response to insulin stimulus	0.000185919	-8.5902	111	52	0.00817996	6357	20933	72508,14245,18759,18519,19325,68328,56017,83946,22433,19016,192157,22628,384783,20430,72993,23830,18710,19255,18746,20913,20846,20411,12927,235344,14732,16337,18795,20402,18708,12390,20588,15387,230796,231207,20683,50933,19090,17274,17918,19062,27273,22278,19246,329877,210789,14158,18605,56458,23921,19262,16591,12566	Rps6kb1,Lpin1,Prkci,Kat2b,Rab10,Rab13,Slc2a8,Phip,Xbp1,Pparg,Socs7,Ywhag,Irs2,Cyfip1,Appl1,Capn10,Pik3r3,Ptpn2,Pkm,Stxbp4,Stat1,Sorbs1,Bcar1,Sik2,Gpam,Insr,Plcb1,Zfp106,Pik3r1,Cav2,Smarcc1,Hnrnpk,Wdtc1,Cpeb2,Sp1,Uchl3,Prkdc,Rab8a,Myo5a,Inpp5k,Pdk4,Usf1,Ptpn1,Dennd4c,Tbc1d4,Fer,Enpp1,Foxo1,Sh2b2,Ptpra,Kl,Cdk2
GO:0034620	cellular response to unfolded protein	0.000190396	-8.5664	53	29	0.0045619	6357	20933	6.93102e+155	Pacrg,Amfr,Edem3,Ptpn1,Eif2ak2,Creb3l2,Dnajc3,Cdk5rap3,Edem2,Vapb,Rnf121,Tbl2,Eif2ak4,Atf3,Uggt1,Uggt2,Ero1l,Xbp1,Selenos,Bhlha15,Ep300,Hspa5,Creb3l1,Eif2ak3,Atf6,Atf4,Edem1,Derl1,Rhbdd1
GO:0051985	negative regulation of chromosome segregation	0.00019216	-8.55718	30	19	0.00298883	6357	20933	2.69512e+98	Zw10,Tnks,Klhl22,Psmg2,Mad1l1,Stil,Apc,Mos,Tex14,Bub1,Wapl,Cep192,Ttk,Terf1,Csnk2a2,Bub3,Mad2l1,Bub1b,Mtbp
GO:0031057	negative regulation of histone modification	0.000196754	-8.53356	39	23	0.00361806	6357	20933	2.44694e+119	Kdm4d,Supt6,Kdm3a,Sirt1,Atg5,Taf7,Dnmt1,Bcor,Kdm4c,Smarcb1,Kdm5a,Twist1,Mecp2,Jarid2,H2afy,Snca,Kdm4a,Atg7,Mtf2,L3mbtl2,Kdm1a,Spi1,Zfp451
GO:0044712	single-organism catabolic process	0.000197941	-8.52754	592	220	0.0346075	6357	20933	14245,17534,19063,15211,76654,66514,225845,269180,11532,192193,270076,67819,74182,72607,67464,23802,110616,217069,20322,18795,18641,140499,18293,15450,81004,77559,18475,14420,229211,11363,52538,11554,108159,72141,11992,242202,93747,74121,16889,213350,20524,26874,57357,75686,14187,223455,15368,110460,18655,229709,18578,216440,14874,12183,83965,16434,66422,66646,18624,56409,15483,19305,319625,22644…	Lpin1,Mrc2,Ppt1,Hexa,Upp2,Asrgl1,Pla2g16,Inpp4a,Adh5,Edem1,Gcdh,Derl1,Gpcpd1,Usp13,Entpd4,Amfr,Atxn3,Trim25,Sord,Plcb1,Pfkl,Ube2j2,Ogdh,Lipc,Tbl1xr1,Agl,Pafah1b2,Galc,Acad9,Acadl,Acaa2,Adrb1,Ubxn8,Adpgk,Auh,Pde5a,Echs1,Acoxl,Lipa,Pddc1,Slc25a17,Abcd2,Srd5a3,Nudt16,Akr1b8,March6,Hmox1,Acat2,Pgk1,Ahcyl1,Pde4b,Os9,Gstz1,Bpgm,Enpp5,Itpa,Dctpp1,Rpe,Pepd,Nudt3,Hsd11b1,Pex5,Galm,Rnf103,Pla2g10,Pde1c,Der…
[truncated: 14,391 more rows]

## Sheet: MYOD1_Circadian_GO
TermID	Term	Enrichment	logP	Genes in Term	Target Genes in Term	Fraction of Targets in Term	Total Target Genes	Total Genes	Entrez Gene IDs	Gene Symbols
[truncated: 14,904 more rows]
