# Supplementary material for: MYOD1 functions as a clock amplifier as well as a critical co-factor for downstream circadian gene expression in muscle
Source: eLife. 2019 Feb 21;8:e43017. doi: 10.7554/eLife.43017 (PMC6398978; doi:10.7554/eLife.43017)
Supplement: Supplementary file 3. [file elife-43017-supp3.xlsx]

## Sheet: Sheet1
Entrez ID	PeakID (cmd=annotatePeaks.pl /Users/brianhodge/Desktop/Tapscott_Data/MYOD1_TAGS/peaks_L6.txt mm10 -gene /Users/brianhodge/Desktop/Tapscott_Data/Hogenesch_Gene_Info.txt)	Chr	Start	End	Strand	Peak Score	Focus Ratio/Region Size	Annotation	Detailed Annotation	Distance to TSS	Nearest PromoterID	Nearest Unigene	Nearest Refseq	Nearest Ensembl	Gene Name	Gene Alias	Gene Description	Gene Type	Gene.Symbol	Hogenesch	BH.Q	ADJ.P	PER	LAG	AMP	t18	t22	t26	t30	t34	t38
11865	chr7-11	chr7	113207115	113207385	+	52.5	0.648	promoter-TSS (NM_007489)	promoter-TSS (NM_007489)	-215	NM_007489	Mm.33970	NM_007489	ENSMUSG00000055116	Arntl	Arnt3|BMAL1b|Bmal1|MOP3|bHLHe5|bmal1b'	aryl hydrocarbon receptor nuclear translocator-like	protein-coding	Arntl	10556463	6.4e-07	1.47e-10	24	5	0.840008	294.575	401.393	394.724	229.176	104.819	165.45
69635	chr13-355	chr13	60455227	60455497	+	13.1	0.667	Intergenic	Intergenic	-146585	NM_001285917	Mm.24103	NM_029653	ENSMUSG00000021559	Dapk1	D13Ucla1|DAP-Kinase	death associated protein kinase 1	protein-coding	Dapk1	10405693	2.18e-06	9.83e-10	24	6	0.297749	7.48395	8.05535	7.61446	7.49092	7.25109	7.28627
78889	chr11-282	chr11	79253912	79254182	+	18.2	0.667	intron (NM_019653, intron 1 of 8)	CpG	648	NM_019653	Mm.307022	NM_019653	ENSMUSG00000017677	Wsb1	1110056B13Rik|2700038M07Rik	WD repeat and SOCS box-containing 1	protein-coding	Wsb1	10388938	4.68e-06	3.16e-09	24	5	0.412611	239.968	327.945	286.545	199.263	146.48	187.298
229599	chr3-107	chr3	95882477	95882747	+	19	0.692	promoter-TSS (NM_001033302)	promoter-TSS (NM_001033302)	-384	NM_001033302	Mm.331218	NM_001033302	ENSMUSG00000038550	Ciart	Chrono|Gm129	circadian associated repressor of transcription	protein-coding	Gm129	10373452	1.04e-05	9.47e-09	24	15	0.924973	6.35416	6.36097	6.82138	8.43278	8.47137	7.17753
67876	chr1-284	chr1	55052583	55052853	+	17.5	0.623	promoter-TSS (NM_001039710)	promoter-TSS (NM_001039710)	-52	NM_026424	Mm.281019	NM_026424	ENSMUSG00000025981	Coq10b	1500041J02Rik|1700030I21Rik|9530077A17Rik|AV002237|AW742641	coenzyme Q10B	protein-coding	Coq10b	10346298	1.04e-05	9.47e-09	24	15	0.554117	245.08	165.969	272.664	463.64	446.569	344.311
65256	chr12-10	chr12	103359460	103359730	+	51.8	0.76	Intergenic	Intergenic	-3594	NM_023049	Mm.27159	NM_023049	ENSMUSG00000021200	Asb2	1110008E15Rik	ankyrin repeat and SOCS box-containing 2	protein-coding	Asb2	10402325	1.46e-05	1.6e-08	24	4	0.263609	3243.42	3469.23	3124.48	2652.8	2118.31	2504.84
18628	chr4-397	chr4	151044446	151044716	+	15.3	0.575	promoter-TSS (NM_001289878)	promoter-TSS (NM_001289878)	84	NM_001289877	Mm.121361	NM_011067	ENSMUSG00000028957	Per3	2810049O06Rik|mPer3	period circadian clock 3	protein-coding	Per3	10518781	1.46e-05	1.6e-08	24	16.5	0.498595	7.72594	7.23998	7.63246	8.18914	8.47723	8.21352
192287	chr9-151	chr9	97110650	97110920	+	18.2	0.711	intron (NM_138756, intron 1 of 6)	CpG	256	NM_138756	Mm.228067	NM_138756	ENSMUSG00000032449	Slc25a36	C330005L02Rik	solute carrier family 25, member 36	protein-coding	Slc25a36	10479979	1.46e-05	1.6e-08	24	5	0.209176	1127.1	1254.68	1177.74	1022.07	763.561	861.024
18712	chr17-15	chr17	29455526	29455796	+	45.2	0.8	Intergenic	Intergenic	-35384	NM_008842	Mm.405293	NM_008842	ENSMUSG00000024014	Pim1	Pim-1	proviral integration site 1	protein-coding	Pim1	10443527	2.1e-05	2.67e-08	24	4.5	0.618584	368.311	356.063	309.407	214.229	183.93	194.17
12753	chr5-279	chr5	76304207	76304477	+	17.5	0.638	promoter-TSS (NM_001305222)	promoter-TSS (NM_001305222)	206	NM_007715	Mm.3552	NM_007715	ENSMUSG00000029238	Clock	5330400M04Rik|KAT13D	circadian locomotor output cycles kaput	protein-coding	Clock	10530733	2.96e-05	4.38e-08	24	7	0.236838	492.575	579.747	588.892	580.045	426.718	430.566
268903	chr16-155	chr16	76372968	76373238	+	16.8	0.574	promoter-TSS (NM_173440)	promoter-TSS (NM_173440)	-54	NM_173440	Mm.74711	NM_173440	ENSMUSG00000048490	Nrip1	6030458L20Rik|8430438I05Rik|9630050P12|AA959574|AW456757|RIP140	nuclear receptor interacting protein 1	protein-coding	Nrip1	10440406	5.83e-05	1.13e-07	24	19	0.413452	469.636	346.978	332.714	386.33	504.759	541.418
75316	chr9-428	chr9	15306153	15306423	+	13.1	0.722	promoter-TSS (NM_001199485)	promoter-TSS (NM_001199485)	74	NR_028401	Mm.354115	NM_026541	ENSMUSG00000031939	Taf1d	2810003M17Rik|4930553M18Rik|5930426I11Rik|Josd3|TAF(I)41|TAFI41	TATA-box binding protein associated factor, RNA polymerase I, D	protein-coding	Taf1d	10583316	5.83e-05	1.13e-07	24	12.5	0.0870661	9.32049	9.37726	9.40453	9.59229	9.45965	9.33488
26427	chr2-44	chr2	92093606	92093876	+	34.3	0.884	Intergenic	(CCCTAA)n|Simple_repeat|Simple_repeat	-69571	NM_011957	Mm.10353	NM_011957	ENSMUSG00000027230	Creb3l1	Oasis	cAMP responsive element binding protein 3-like 1	protein-coding	Creb3l1	10485117	7.93e-05	1.79e-07	24	8	0.502322	109.674	160.357	154.085	153.051	97.8642	81.8301
76820	chr12-473	chr12	12262243	12262513	+	10.9	0.68	intron (NM_001146119, intron 1 of 11)	CpG	239	NM_029758	Mm.440802	NM_029758	ENSMUSG00000020589	Fam49a	2410157M17Rik|9630047E15|D12Ertd553e	family with sequence similarity 49, member A	protein-coding	Fam49a	10394593	7.93e-05	1.79e-07	24	5	0.288853	114.854	168.815	130.845	119.441	113.789	98.189
328329	chr13-219	chr13	103334299	103334569	+	16.8	0.722	promoter-TSS (NM_175171)	promoter-TSS (NM_175171)	58	NM_175171	Mm.202606	NM_175171	ENSMUSG00000034751	Mast4	4930420O11Rik|AI642422|mKIAA0303	microtubule associated serine/threonine kinase family member 4	protein-coding	Mast4	10411804	7.93e-05	1.79e-07	24	8	0.231379	335.461	423.333	408.661	450.583	324.918	298.716
270110	chr8-37	chr8	126595425	126595695	+	38.6	0.779	Intergenic	Intergenic	-2124	NM_001164598	Mm.334918	NM_001164598	ENSMUSG00000051495	Irf2bp2	E130305N23Rik|IRF-2BP2	interferon regulatory factor 2 binding protein 2	protein-coding	Irf2bp2	10582811	0.00019975	6.59e-07	24	4	0.153265	376.282	436.507	363.951	310.186	275.984	302.007
240131	chr17-35	chr17	67629203	67629473	+	30.6	0.875	Intergenic	Intergenic	3385	NM_001033340	Mm.295736	NM_001033340	ENSMUSG00000073375	Lrrc30	Gm326	leucine rich repeat containing 30	protein-coding	Lrrc30	10452609	0.00019975	6.59e-07	24	2	0.275581	1284.77	1279.27	1169.03	728.482	851.481	1167.82
94212	chr3-30	chr3	9832876	9833146	+	25.5	0.741	intron (NM_001195031, intron 1 of 8)	intron (NM_001195031, intron 1 of 8)	668	NM_053182	Mm.23897	NM_053182	ENSMUSG00000027508	Pag1	Cbp|F730007C19Rik|Pag	phosphoprotein associated with glycosphingolipid microdomains 1	protein-coding	Pag1	10497237	0.00019975	6.59e-07	24	2	0.135036	59.3777	57.7316	49.7833	45.8971	48.6936	52.3153
12826	chr8-24	chr8	11348715	11348985	+	42.3	0.785	intron (NM_009932, intron 3 of 47)	intron (NM_009932, intron 3 of 47)	-36024	NM_009931	Mm.738	NM_009931	ENSMUSG00000031502	Col4a1	Bru|Col4a-1|Raw|Svc	collagen, type IV, alpha 1	protein-coding	Col4a1	10576973	0.000268293	9.96e-07	24	8.5	0.180227	211.122	249.228	267.262	240.72	210.6	205.76
16716	chr9-64	chr9	102494559	102494829	+	29.2	0.782	Intergenic	Intergenic	-11444	NM_024291	Mm.101692	NM_024291	ENSMUSG00000035606	Ky	CD1|D9Mgc44e|ky	kyphoscoliosis peptidase	protein-coding	Ky	10588203	0.000268293	9.96e-07	24	14	0.318884	735.958	764.366	891.506	1069.48	1053.66	926.239
20541	chr17-635	chr17	81669530	81669800	+	10.9	0.621	intron (NR_104580, intron 1 of 8)	intron (NR_104580, intron 1 of 8)	68722	NM_001112798	Mm.265834	NM_011406	ENSMUSG00000054640	Slc8a1	AI852629|AV344025|D930008O12Rik|Ncx1	solute carrier family 8 (sodium/calcium exchanger), member 1	protein-coding	Slc8a1	10453233	0.000268293	9.96e-07	24	9	0.286725	6.59942	6.88081	7.28994	7.1298	6.79639	6.63085
21685	chr15-12	chr15	81831528	81831798	+	38.6	0.667	Intergenic	Intergenic	20249	NM_017376	Mm.270278	NM_017376	ENSMUSG00000022389	Tef	2310028D20Rik	thyrotroph embryonic factor	protein-coding	Tef	10425601	0.000268293	9.96e-07	24	16.5	0.175978	564.042	458.482	510.572	539.856	633.324	593.49
14645	chr1-30	chr1	153899865	153900135	+	29.2	0.611	promoter-TSS (NM_008131)	promoter-TSS (NM_008131)	71	NM_008131	Mm.210745	NM_008131	ENSMUSG00000026473	Glul	GS|Glns	glutamate-ammonia ligase (glutamine synthetase)	protein-coding	Glul	10350753	0.000358582	1.49e-06	24	22	0.408496	2446.32	1922.14	1517.2	1566.69	2023.03	2372.35
353187	chr14-38	chr14	18238695	18238965	+	27	0.632	5' UTR (NM_011584, exon 1 of 8)	5' UTR (NM_011584, exon 1 of 8)	276	NM_011584	Mm.26587	NM_011584	ENSMUSG00000021775	Nr1d2	RVR|Rev-erb	nuclear receptor subfamily 1, group D, member 2	protein-coding	Nr1d2	10417734	0.000358582	1.49e-06	24	15.5	0.244235	1096.58	881.007	1069.34	1313.41	1331.28	1206.07
68149	chr12-295	chr12	103388689	103388959	+	13.1	0.639	5' UTR (NM_001177841, exon 1 of 7)	5' UTR (NM_001177841, exon 1 of 7)	142	NM_001177841	Mm.127378	NM_026580	ENSMUSG00000021203	Otub2	2010015L18Rik|4930586I02Rik|AI413508|AW557219|OTB2|OTU2	OTU domain, ubiquitin aldehyde binding 2	protein-coding	Otub2	10397966	0.000358582	1.49e-06	24	5	0.426675	8.10948	8.41844	8.40733	7.95185	7.54993	7.82951
53412	chr19-39	chr19	36731377	36731647	+	24.1	0.778	TTS (NM_016854)	TTS (NM_016854)	5092	NM_016854	Mm.24724	NM_016854	ENSMUSG00000067279	Ppp1r3c	PTG|Ppp1r5	protein phosphatase 1, regulatory (inhibitor) subunit 3C	protein-coding	Ppp1r3c	10467206	0.000358582	1.49e-06	24	2.5	0.401566	2627.73	2917.87	2337.74	1834.79	1712.04	2601.63
319974	chr5-881	chr5	132648788	132649058	+	11.7	0.696	Intergenic	Intergenic	-106580	NM_177047	Mm.409595	NM_177047	ENSMUSG00000029673	Auts2	2700063G02Rik|A730011F23Rik|D830032G16Rik	autism susceptibility candidate 2	protein-coding	Auts2	10534168	0.000475517	2.21e-06	24	8	0.368289	163.446	213.436	227.328	199.685	139.173	119.523
18708	chr13-91	chr13	101768019	101768289	+	20.4	0.695	promoter-TSS (NM_001077495)	promoter-TSS (NM_001077495)	63	NM_001077495	Mm.259333	NM_001024955	ENSMUSG00000041417	Pik3r1	PI3K|p50alpha|p55alpha|p85alpha	phosphatidylinositol 3-kinase, regulatory subunit, polypeptide 1 (p85 alpha)	protein-coding	Pik3r1	10411782	0.000475517	2.21e-06	24	1	0.291908	9.65521	10.0004	9.32028	9.22576	9.39573	9.72398
67760	chr15-120	chr15	96709540	96709810	+	17.5	0.476	Intergenic	CpG	-9977	NM_175121	Mm.46754	NM_175121	ENSMUSG00000022462	Slc38a2	5033402L14Rik|AI316867|ATA2|SAT2|mKIAA1382	solute carrier family 38, member 2	protein-coding	Slc38a2	10431894	0.000475517	2.21e-06	24	1.5	0.334391	2823.17	2791.84	2327.56	1848.58	1879.46	2543.85
77864	chr11-783	chr11	86993635	86993905	+	16	0.675	promoter-TSS (NM_001005341)	promoter-TSS (NM_001005341)	-8	NM_001005341	Mm.191894	NM_001005341	ENSMUSG00000018427	Ypel2	6430570G24|E130113K08Rik	yippee-like 2 (Drosophila)	protein-coding	Ypel2	10389581	0.000475517	2.21e-06	24	3.5	0.545073	222.167	217.654	199.387	123.515	116.395	159.311
16647	chr11-169	chr11	107012766	107013036	+	24.8	0.643	Intergenic	tRNA-Arg-AGG|tRNA|tRNA	-13376	NM_010655	Mm.12508	NM_010655	ENSMUSG00000018362	Kpna2	2410044B12Rik|IPOA1|PTAC58|Rch1	karyopherin (importin) alpha 2	protein-coding	Kpna2	10392284	0.000626016	3.24e-06	24	17	0.326648	301.159	280.25	267.334	342.035	411.886	386.017
68041	chrX-63	chrX	10717317	10717587	+	11.7	0.769	promoter-TSS (NM_001166635)	promoter-TSS (NM_001166635)	87	NM_026524	Mm.29429	NM_026524	ENSMUSG00000008035	Mid1ip1	3110038L01Rik|Mig12|S14R	Mid1 interacting protein 1 (gastrulation specific G12-like (zebrafish))	protein-coding	Mid1ip1	10598638	0.000626016	3.24e-06	24	20	0.330544	246.385	153.604	142.278	202.318	279.867	301.152
59028	chr19-300	chr19	29100917	29101187	+	13.9	0.59	promoter-TSS (NM_021525)	promoter-TSS (NM_021525)	-323	NM_021525	Mm.28630	NM_021525	ENSMUSG00000024785	Rcl1	2310040A02Rik|AI789745|C76567|RPCL1|Rnac	RNA terminal phosphate cyclase-like 1	protein-coding	Rcl1	10462346	0.000626016	3.24e-06	24	14	0.28343	201.457	169.488	197.737	256.953	223.77	201.919
240064	chr17-1001	chr17	32829855	32830125	+	9.48	0.565	intron (NM_177359, intron 1 of 3)	intron (NM_177359, intron 1 of 3)	271	NM_177359	Mm.476307	NM_177359	ENSMUSG00000095253	Zfp799	6030490I01Rik	zinc finger protein 799	protein-coding	Zfp799	10449926	0.000626016	3.24e-06	24	12	0.0938826	117.715	139.983	146.141	180.637	144.257	133.292
208104	chr5-78	chr5	123417176	123417446	+	25.5	0.837	intron (NM_133917, intron 1 of 16)	intron (NM_133917, intron 1 of 16)	22513	NM_133917	Mm.83277	NM_133917	ENSMUSG00000038342	Mlxip	AW228700|Mir|bHLHe36	MLX interacting protein	protein-coding	Mlxip	10525555	0.00104816	6.8e-06	24	5.5	0.0871156	850.861	929.641	896.6	858.718	739.471	774.268
19258	chr1-290	chr1	119837451	119837721	+	19	0.547	promoter-TSS (NM_019933)	promoter-TSS (NM_019933)	-515	NM_019933	Mm.458796	NM_019933	ENSMUSG00000026384	Ptpn4	PTPMEG|Ptn4|TEP|TEP/mPTPMEG|hPTP-MEG	protein tyrosine phosphatase, non-receptor type 4	protein-coding	Ptpn4	10357191	0.00104816	6.8e-06	24	7	0.348646	275.873	424.859	395.252	407.883	255.491	274.861
99929	chr3-242	chr3	65528147	65528417	+	16	0.547	promoter-TSS (NM_178892)	promoter-TSS (NM_178892)	-165	NM_178892	Mm.246398	NM_178892	ENSMUSG00000034640	Tiparp	ARTD14|AW558171|PARP7	TCDD-inducible poly(ADP-ribose) polymerase	protein-coding	Tiparp	10492428	0.00104816	6.8e-06	24	14	0.302373	264.954	315.027	324.022	454.479	448.101	376.29
217082	chr11-1270	chr11	90390743	90391013	+	10.9	0.692	promoter-TSS (NM_172563)	promoter-TSS (NM_172563)	39	NM_172563	Mm.158903	NM_172563	ENSMUSG00000003949	Hlf	E230015K02Rik	hepatic leukemia factor	protein-coding	Hlf	10389786	0.00134283	9.73e-06	24	17	0.32662	225.695	172.75	200.379	234.49	278.254	271.719
53318	chr8-208	chr8	45877741	45878011	+	17.5	0.771	Intergenic	MLT1G3|LTR|ERVL-MaLR	-7609	NM_016798	Mm.282900	NM_016798	ENSMUSG00000031636	Pdlim3	AI463105|ALP|Actn2lp	PDZ and LIM domain 3	protein-coding	Pdlim3	10571601	0.00134283	9.73e-06	24	4	0.0271529	5141.59	5495.75	5402.46	5007.93	4711.92	5202.9
170768	chr2-106	chr2	11535525	11535795	+	23.3	0.63	intron (NM_001177758, intron 1 of 14)	CpG	18269	NM_001177758	Mm.19669	NM_133232	ENSMUSG00000026773	Pfkfb3	E330010H22Rik|iPFK-2|uPFK-2	6-phosphofructo-2-kinase/fructose-2,6-biphosphatase 3	protein-coding	Pfkfb3	10480035	0.00134283	9.73e-06	24	10.5	0.668322	9.45114	10.374	10.6569	10.9508	10.2322	9.52062
19696	chr11-80	chr11	23770642	23770912	+	27	0.623	5' UTR (NM_009044, exon 1 of 10)	5' UTR (NM_009044, exon 1 of 10)	193	NM_009044	Mm.4869	NM_009044	ENSMUSG00000020275	Rel	c-Rel	reticuloendotheliosis oncogene	protein-coding	Rel	10384725	0.00134283	9.73e-06	24	4	0.269386	317.92	361.768	318.07	264.734	236.737	307.135
81879	chr1-579	chr1	118627642	118627912	+	13.9	0.852	promoter-TSS (NM_023755)	promoter-TSS (NM_023755)	-168	NM_023755	Mm.24621	NM_023755	ENSMUSG00000026380	Tfcp2l1	1810030F05Rik|4932442M07Rik|AA575098|Cp2l1|Crtr-1|D930018N21Rik|LBP-9|Tcfcp2l1	transcription factor CP2-like 1	protein-coding	Tfcp2l1	10349295	0.00134283	9.73e-06	24	20.5	0.427602	373.196	260.049	234.249	245.413	369.654	504.535
387609	chr15-41	chr15	57719319	57719589	+	28.4	0.687	intron (NM_199449, intron 1 of 3)	LTR79|LTR|ERVL	24787	NM_199449	Mm.36557	NM_199449	ENSMUSG00000071757	Zhx2	Afr-1|Afr1|Raf|mKIAA0854	zinc fingers and homeoboxes 2	protein-coding	Zhx2	10424213	0.00134283	9.73e-06	24	7	0.307577	462.375	511.199	528.669	454.728	378.136	356.332
329154	chr1-430	chr1	54830335	54830605	+	15.3	0.658	intron (NM_001081433, intron 1 of 27)	intron (NM_001081433, intron 1 of 27)	95917	NM_001081433	Mm.397910	NM_001081433	ENSMUSG00000052331	Ankrd44	4930444A19Rik|A130096K20|E130014H08Rik|PP6-ARS-B	ankyrin repeat domain 44	protein-coding	Ankrd44	10354677	0.00172794	1.38e-05	24	5.5	0.398936	94.9503	158.222	104.348	119.798	80.8665	79.539
29815	chr3-887	chr3	122413828	122414098	+	8.75	0.789	Intergenic	(CCTG)n|Simple_repeat|Simple_repeat	-5817	NM_013867	Mm.45815	NM_013867	ENSMUSG00000028121	Bcar3	AI131758|AND-34	breast cancer anti-estrogen resistance 3	protein-coding	Bcar3	10495781	0.00172794	1.38e-05	24	6	0.0700743	6.26012	6.38199	6.35156	6.33164	6.10012	6.26611
234678	chr8-140	chr8	105225037	105225307	+	20.4	0.674	promoter-TSS (NM_145604)	promoter-TSS (NM_145604)	-16	NM_145604	Mm.27186	NM_145604	ENSMUSG00000031889	D230025D16Rik	BC006874|Lin10	RIKEN cDNA D230025D16 gene	protein-coding	D230025D16Rik	10574641	0.00172794	1.38e-05	24	7.5	0.139364	529.233	592.237	607.883	620.411	516.613	493.618
16438	chr6-307	chr6	108213101	108213371	+	14.6	0.639	5' UTR (NM_010585, exon 1 of 62)	5' UTR (NM_010585, exon 1 of 62)	140	NM_010585	Mm.227912	NM_010585	ENSMUSG00000030102	Itpr1	D6Pas2|ENSMUSG00000072853|Gm10429|IP3R 1|IP3R1|InsP3R|Ip3r|Itpr-1|P400|Pcp-1|Pcp1|insP3R1|opt|wblo	inositol 1,4,5-trisphosphate receptor 1	protein-coding	Itpr1	10540408	0.00172794	1.38e-05	24	6.5	0.197955	184.833	209.73	205.004	197.359	166.192	161.998
108829	chr10-285	chr10	67185607	67185877	+	16.8	0.667	promoter-TSS (NM_001242396)	promoter-TSS (NM_001242396)	-8	NM_001242396	Mm.23846	NM_207221	ENSMUSG00000037876	Jmjd1c	5430433L24Rik|D630035I23Rik|Jmjdic|TRIP8	jumonji domain containing 1C	protein-coding	Jmjd1c	10363706	0.00172794	1.38e-05	24	3	0.084973	8.7963	8.79514	8.58988	8.57748	8.58537	8.59661
11796	chr9-379	chr9	7872738	7873008	+	15.3	0.675	5' UTR (NM_007464, exon 1 of 9)	5' UTR (NM_007464, exon 1 of 9)	297	NM_007464	Mm.2026	NM_007464	ENSMUSG00000032000	Birc3	AW107670|Api1|Api2|Birc2|C-IAP2|HIAP2|IAP1|IAP2|MIAP1|MIAP2|MIHB|MIHC|RNF49|cIAP-1|cIAP-2|cIAP1|cIAP2	baculoviral IAP repeat-containing 3	protein-coding	Birc3	10590801	0.00220262	1.94e-05	24	5.5	0.16774	108.656	137.656	109.421	111.549	110.754	93.6658
12402	chr9-273	chr9	44233454	44233724	+	16.8	0.628	intron (NM_007619, intron 1 of 15)	intron (NM_007619, intron 1 of 15)	457	NM_007619	Mm.266871	NM_007619	ENSMUSG00000034342	Cbl	4732447J05Rik|Cbl-2|c-Cbl|cbl	Casitas B-lineage lymphoma	protein-coding	Cbl	10592734	0.00220262	1.94e-05	24	5	0.104489	221.062	265.048	220.677	231.245	203.926	210.308
231070	chr5-174	chr5	28071455	28071725	+	20.4	0.63	exon (NM_153526, exon 1 of 5)	exon (NM_153526, exon 1 of 5)	178	NM_153526	Mm.30221	NM_153526	ENSMUSG00000045294	Insig1	1810013C12Rik|Insig-1	insulin induced gene 1	protein-coding	Insig1	10520362	0.00220262	1.94e-05	24	7	0.231981	246.965	335.321	327.656	311.541	287.435	239.511
16468	chr13-775	chr13	44775558	44775828	+	9.48	0.824	intron (NM_001205044, intron 2 of 18)	MTD|LTR|ERVL-MaLR	44422	NM_001205043	Mm.25059	NM_021878	ENSMUSG00000038518	Jarid2	Jmj|jumonji	jumonji, AT rich interactive domain 2	protein-coding	Jarid2	10404848	0.00220262	1.94e-05	24	14.5	0.227299	9.29462	9.08077	9.26525	9.49212	9.51638	9.28698
22390	chr7-506	chr7	110164886	110165156	+	13.1	0.733	Intergenic	Intergenic	42962	NM_009516	Mm.287173	NM_009516	ENSMUSG00000031016	Wee1	Wee1A	WEE 1 homolog 1 (S. pombe)	protein-coding	Wee1	10556266	0.00220262	1.94e-05	24	19	0.397189	158.25	152.512	118.819	160.875	208.241	196.192
14369	chr1-360	chr1	59409596	59409866	+	16	0.765	Intergenic	Intergenic	-72416	NM_008057	Mm.297906	NM_008057	ENSMUSG00000041075	Fzd7	Fz7	frizzled class receptor 7	protein-coding	Fzd7	10346607	0.00276041	2.72e-05	24	13	0.267187	387.867	435.452	427.251	608.68	514.694	401.735
18578	chr4-90	chr4	102511629	102511899	+	22.6	0.653	intron (NM_019840, intron 5 of 14)	intron (NM_019840, intron 5 of 14)	-58296	NM_001177980	Mm.20181	NM_019840	ENSMUSG00000028525	Pde4b	Dpde4|R74983|dunce	phosphodiesterase 4B, cAMP specific	protein-coding	Pde4b	10506335	0.00276041	2.72e-05	24	4	0.174295	9.16943	9.16995	9.01668	8.85309	8.59659	8.95213
20975	chr17-158	chr17	5997545	5997815	+	19.7	0.75	intron (NM_001113352, intron 5 of 25)	intron (NM_001113352, intron 5 of 25)	-9900	NM_001290698	Mm.236068	NM_011523	ENSMUSG00000023805	Synj2	AI481647|SJ2|mKIAA0348	synaptojanin 2	protein-coding	Synj2	10441456	0.00276041	2.72e-05	24	14	0.250556	7.50102	7.34315	7.72536	7.8973	7.79027	7.59139
193385	chr13-835	chr13	24610892	24611162	+	8.75	0.857	intron (NM_001286100, intron 1 of 22)	ORR1E|LTR|ERVL-MaLR	-3579	NM_178658	Mm.217319	NM_029679	ENSMUSG00000036006	Fam65b	-	family with sequence similarity 65, member B	protein-coding	Fam65b	10404152	0.00348877	3.77e-05	24	4.5	0.181613	7.15827	7.75353	6.89519	7.1286	6.77881	6.93038
228850	chr2-341	chr2	158409748	158410018	+	17.5	0.609	promoter-TSS (NM_001291138)	promoter-TSS (NM_001291138)	30	NM_001291138	Mm.398185	NM_177227	ENSMUSG00000027652	Ralgapb	AI507211|B230339M05Rik|p170	Ral GTPase activating protein, beta subunit (non-catalytic)	protein-coding	Ralgapb	10478077	0.00348877	3.77e-05	24	6.5	0.0438477	9.53796	9.55377	9.55557	9.53284	9.45843	9.44819
21679	chr6-36	chr6	128265062	128265332	+	32.1	0.609	intron (NM_011567, intron 2 of 11)	intron (NM_011567, intron 2 of 11)	35616	NM_011567	Mm.14774	NM_011567	ENSMUSG00000030353	Tead4	ETFR-2|Etfr2|FR-19|Rtef1|TEAD-4|TEF-3|Tcf13r1|Tef3|Tefr|Tefr1|Tefr1a	TEA domain family member 4	protein-coding	Tead4	10548146	0.00348877	3.77e-05	24	6	0.233027	223.776	220.089	252.868	220.195	172.341	164.589
109676	chr3-749	chr3	127019217	127019487	+	10.2	0.824	intron (NM_001327938, intron 14 of 47)	intron (NM_001327938, intron 14 of 47)	-20900	NM_178655	Mm.220242	NM_178655	ENSMUSG00000032826	Ank2	100043364|AI835472|AW491075|Ank-2|Gm4392	ankyrin 2, brain	protein-coding	Ank2	10501971	0.0043622	5.2e-05	24	14	0.118313	306.984	300.779	344.734	431.017	343.503	315.302
54343	chr6-143	chr6	136468506	136468776	+	20.4	0.698	Intergenic	Intergenic	-50210	NM_019426	Mm.173271	NM_019426	ENSMUSG00000030213	Atf7ip	2610204M12Rik|AM|Mcaf1	activating transcription factor 7 interacting protein	protein-coding	Atf7ip	10542378	0.0043622	5.2e-05	24	13	0.0498227	748.76	814.929	836.569	909.633	864.936	823.377
330409	chr6-359	chr6	120666064	120666334	+	14.6	0.742	promoter-TSS (NM_001128151)	promoter-TSS (NM_001128151)	-222	NM_001128151	Mm.333357	NM_001128151	ENSMUSG00000071226	Cecr2	2610101O16Rik|2810409N01Rik|Gtl4|mKIAA1740	cat eye syndrome chromosome region, candidate 2	protein-coding	Cecr2	10541260	0.0043622	5.2e-05	24	12.5	0.237203	142.346	152.764	174.85	246.804	183.232	146.694
99712	chr3-50	chr3	106547816	106548086	+	21.9	0.679	promoter-TSS (NM_001293694)	promoter-TSS (NM_001293694)	-149	NM_133869	Mm.429443	NM_133869	ENSMUSG00000040774	Cept1	9930118K05Rik|mCEPT1	choline/ethanolaminephosphotransferase 1	protein-coding	Cept1	10501051	0.0043622	5.2e-05	24	7	0.175504	392.03	447.052	452.609	439.232	390.649	375.243
18021	chr8-114	chr8	106044214	106044484	+	21.1	0.789	intron (NM_001301176, intron 8 of 14)	intron (NM_001301176, intron 8 of 14)	-15254	NM_010901	Mm.383185	NM_010901	ENSMUSG00000031902	Nfatc3	C80703|D8Ertd281e|NFAT4|NFATx	nuclear factor of activated T cells, cytoplasmic, calcineurin dependent 3	protein-coding	Nfatc3	10574962	0.0043622	5.2e-05	24	7	0.121658	679.298	765.336	737.275	773.324	640.156	634.568
665119	chr16-171	chr16	5172698	5172968	+	16.8	0.781	intron (NM_001127725, intron 7 of 15)	MLT1K|LTR|ERVL-MaLR	25724	NM_001127725	Mm.102072	NM_001127725	ENSMUSG00000091712	Sec14l5	-	SEC14-like lipid binding 5	protein-coding	Sec14l5	10433373	0.0043622	5.2e-05	24	5	0.182285	164.008	151.256	175.651	142.232	136.058	137.215
219134	chr14-59	chr14	59626118	59626388	+	21.9	0.611	exon (NM_145463, exon 1 of 2)	exon (NM_145463, exon 1 of 2)	972	NM_145463	Mm.275409	NM_145463	ENSMUSG00000044461	Shisa2	9430059P22Rik|MAd2|Tmem46|mShisa|shisa	shisa family member 2	protein-coding	Shisa2	10415693	0.0043622	5.2e-05	24	4	0.116842	576.893	576.441	529.211	478.226	452.395	471.822
17127	chr9-1212	chr9	63832351	63832621	+	8.75	0.765	Intergenic	Intergenic	-74492	NM_016769	Mm.7320	NM_016769	ENSMUSG00000032402	Smad3	AU022421|Madh3	SMAD family member 3	protein-coding	Smad3	10594404	0.0043622	5.2e-05	24	5	0.171459	769.843	756.339	662.685	699.044	530.552	649.75
58800	chr2-328	chr2	126876181	126876451	+	18.2	0.674	promoter-TSS (NM_001164325)	promoter-TSS (NM_001164325)	-55	NM_001164325	Mm.244705	NM_021450	ENSMUSG00000027365	Trpm7	2310022G15Rik|4833414K03Rik|5033407O22Rik|CHAK|CHAK1|LTrpC-7|Ltpr7|Ltrpc7|TRPPLIK	transient receptor potential cation channel, subfamily M, member 7	protein-coding	Trpm7	10487277	0.0043622	5.2e-05	24	14.5	0.161203	8.6722	8.80865	8.84243	9.09119	9.18981	9.03998
72345	chrX-144	chrX	95444476	95444746	+	8.75	0.6	intron (NM_175179, intron 1 of 1)	intron (NM_175179, intron 1 of 1)	229	NM_175179	Mm.182867	NM_175179	ENSMUSG00000050332	Amer1	2810002O09Rik|AW492303|Fam123b|Wtx	APC membrane recruitment 1	protein-coding	Fam123b	10605811	0.00543649	7.11e-05	24	5.5	0.286237	7.63376	7.56336	7.80664	7.45029	7.2823	7.30346
320924	chr18-291	chr18	66291538	66291808	+	12.4	0.72	exon (NM_178793, exon 1 of 11)	exon (NM_178793, exon 1 of 11)	165	NM_178793	Mm.442049	NM_178793	ENSMUSG00000046318	Ccbe1	4933426F18Rik|9430093N24Rik|mKIAA1983	collagen and calcium binding EGF domains 1	protein-coding	Ccbe1	10459496	0.00543649	7.11e-05	24	17	0.151399	115.546	104.816	96.0537	121.988	134.154	102.706
229776	chr3-52	chr3	116423701	116423971	+	21.9	0.6	5' UTR (NM_001173553, exon 1 of 14)	5' UTR (NM_001173553, exon 1 of 14)	196	NM_001173553	Mm.17647	NM_001080818	ENSMUSG00000033502	Cdc14a	A830059A17Rik|CDC14A2|CDC14a1|Cdc14	CDC14 cell division cycle 14A	protein-coding	Cdc14a	10501629	0.00543649	7.11e-05	24	20	0.274605	9.47608	9.32924	8.84603	9.27621	9.50537	9.74738
12827	chr8-65	chr8	11183828	11184098	+	27.7	0.764	Intergenic	Intergenic	-128842	NM_009932	Mm.181021	NM_009932	ENSMUSG00000031503	Col4a2	Col4a-2	collagen, type IV, alpha 2	protein-coding	Col4a2	10570068	0.00543649	7.11e-05	24	9	0.238083	194.676	220.122	234.236	238.405	176.833	185.48
12894	chr19-432	chr19	3353766	3354036	+	11.7	0.704	intron (NM_013495, intron 3 of 18)	intron (NM_013495, intron 3 of 18)	30600	NM_013495	Mm.18522	NM_013495	ENSMUSG00000024900	Cpt1a	C730027G07|CPTI|Cpt1	carnitine palmitoyltransferase 1a, liver	protein-coding	Cpt1a	10460157	0.00543649	7.11e-05	24	13	0.177929	6.77394	7.40577	7.18607	7.80793	7.65589	7.1861
14245	chr12-713	chr12	16271025	16271295	+	8.75	0.6	Intergenic	Intergenic	318610	NM_001130412	Mm.153625	NM_015763	ENSMUSG00000020593	Lpin1	4631420P06|Kiaa0188|Lipin1|fld|mKIAA0188	lipin 1	protein-coding	Lpin1	10399478	0.00543649	7.11e-05	24	6	0.0451134	11.1649	11.2166	11.1323	11.1659	10.9581	11.0102
17909	chr15-311	chr15	25669925	25670195	+	15.3	0.727	intron (NM_019472, intron 2 of 40)	intron (NM_019472, intron 2 of 40)	47510	NM_019472	Mm.60590	NM_019472	ENSMUSG00000022272	Myo10	AW048724|D15Ertd600e|mKIAA0799|myosin-X	myosin X	protein-coding	Myo10	10423293	0.00543649	7.11e-05	24	8	0.114205	497.113	544.535	521.542	522.443	446.823	453.397
210544	chr15-128	chr15	57912264	57912534	+	18.2	0.681	intron (NM_001167679, intron 1 of 17)	CpG	200	NM_001167679	Mm.390835	NM_199300	ENSMUSG00000022364	Tbc1d31	4B3|D330013L20Rik|Gm85|Wdr67	TBC1 domain family, member 31	protein-coding	Wdr67	10424221	0.00543649	7.11e-05	24	4	0.129966	7.12047	7.23671	6.99957	7.03593	6.71583	6.88257
69053	chr16-33	chr16	8829192	8829462	+	24.1	0.636	promoter-TSS (NM_001081400)	promoter-TSS (NM_001081400)	-773	NM_001081400	Mm.390868	NM_001081400	ENSMUSG00000022507	1810013L24Rik	1110017P05Rik|3010002C02Rik|AA792997|AW124177|Gm19906|R74903	RIKEN cDNA 1810013L24 gene	protein-coding	1810013L24Rik	10433472	0.00639386	8.39e-05	24	15	0.188126	727.327	663.885	659.327	821.194	801.034	723.691
16764	chr1-1004	chr1	38626501	38626771	+	10.2	0.615	intron (NM_001290814, intron 1 of 21)	intron (NM_001290814, intron 1 of 21)	608	NM_001290814	Mm.336679	NM_010678	ENSMUSG00000037138	Aff3	3222402O04Rik|A730046J16|LAF-4|Laf4	AF4/FMR2 family, member 3	protein-coding	Aff3	10354111	0.00673042	9.66e-05	24	5	0.0370383	5.67828	6.01978	5.60876	5.76428	5.67688	5.51038
320790	chr4-384	chr4	8647298	8647568	+	12.4	0.7	Intergenic	CpG	-42973	NM_001277149	Mm.138792	NM_001033395	ENSMUSG00000041235	Chd7	A730019I05Rik|Cycn|Cyn|Dz|Edy|Flo|GENA 47|GENA 60|Gena 52|Lda|Mt|Obt|Todo|WBE1|Whi|metis	chromodomain helicase DNA binding protein 7	protein-coding	Chd7	10503218	0.00673042	9.66e-05	24	5	0.181528	8.34356	8.42502	8.47064	8.18429	8.02639	8.17945
230789	chr4-94	chr4	132922781	132923051	+	21.9	0.686	promoter-TSS (NM_145553)	promoter-TSS (NM_145553)	-365	NM_145553	Mm.11473	NM_145553	ENSMUSG00000028878	Fam76a	-	family with sequence similarity 76, member A	protein-coding	Fam76a	10516994	0.00673042	9.66e-05	24	18	0.132356	234.324	226.659	227.018	243.558	264.338	274.621
14674	chr11-203	chr11	109362870	109363140	+	22.6	0.524	exon (NM_010303, exon 1 of 4)	exon (NM_010303, exon 1 of 4)	211	NM_010303	Mm.193925	NM_010303	ENSMUSG00000020611	Gna13	AU024132|AU043124|Galpha13	guanine nucleotide binding protein, alpha 13	protein-coding	Gna13	10382243	0.00673042	9.66e-05	24	5	0.115435	874.861	984.795	923.412	926.02	774.14	756.596
14773	chr19-68	chr19	60924587	60924857	+	24.1	0.892	intron (NM_018869, intron 1 of 15)	IMPB_01|Satellite|Satellite	34973	NM_018869	Mm.279400	NM_018869	ENSMUSG00000003228	Grk5	Gprk5	G protein-coupled receptor kinase 5	protein-coding	Grk5	10464425	0.00673042	9.66e-05	24	6.5	0.25062	103.829	125.087	110.098	119.065	83.7699	87.4969
71567	chr10-653	chr10	53629659	53629929	+	11.7	0.613	exon (NM_027830, exon 2 of 14)	exon (NM_027830, exon 2 of 14)	645	NM_027830	Mm.278221	NM_027830	ENSMUSG00000058298	Mcm9	9030408O17Rik|Gm235|Mcmdc1	minichromosome maintenance 9 homologous recombination repair factor	protein-coding	Mcm9	10369116	0.00673042	9.66e-05	24	3	0.0955301	42.649	44.9008	39.9737	39.886	40.426	39.2027
17878	chr10-638	chr10	107494166	107494436	+	10.2	0.655	exon (NM_008657, exon 1 of 3)	exon (NM_008657, exon 1 of 3)	428	NM_008657	Mm.11	NM_008657	ENSMUSG00000035923	Myf6	MRF4|bHLHc4|herculin	myogenic factor 6	protein-coding	Myf6	10372230	0.00673042	9.66e-05	24	0	0.198061	2723.22	2137.19	2115.52	1990.48	2160.43	2417
381305	chr1-188	chr1	160906545	160906815	+	18.2	0.534	5' UTR (NM_001024952, exon 1 of 20)	5' UTR (NM_001024952, exon 1 of 20)	269	NM_001024952	Mm.329667	NM_001024952	ENSMUSG00000040423	Rc3h1	5730557L09Rik|Gm551|N28103|mKIAA2025	RING CCCH (C3H) domains 1	protein-coding	Rc3h1	10350992	0.00673042	9.66e-05	24	3	0.192588	752.308	893.479	671.983	666.703	606.969	738.826
68867	chr8-58	chr8	31121332	31121602	+	24.8	0.656	intron (NM_175136, intron 2 of 5)	intron (NM_175136, intron 2 of 5)	9621	NM_175136	Mm.29532	NM_175136	ENSMUSG00000039328	Rnf122	1110063C11Rik	ring finger protein 122	protein-coding	Rnf122	10571214	0.00673042	9.66e-05	24	4	0.189427	382.175	335.242	372.932	283.707	232.389	281.377
67213	chr9-133	chr9	114731117	114731387	+	20.4	0.711	promoter-TSS (NM_026036)	promoter-TSS (NM_026036)	49	NM_026036	Mm.28858	NM_026036	ENSMUSG00000032434	Cmtm6	2810051A14Rik|AA536733|Cklfsf6	CKLF-like MARVEL transmembrane domain containing 6	protein-coding	Cmtm6	10589929	0.00831056	0.000130539	24	6	0.21373	216.575	284.365	256.905	229.204	208.585	177.419
15519	chr12-90	chr12	110695950	110696220	+	19	0.674	intron (NM_010480, intron 1 of 10)	CpG	310	NM_010480	Mm.1843	NM_010480	ENSMUSG00000021270	Hsp90aa1	86kDa|89kDa|AL024080|AL024147|Hsp86-1|Hsp89|Hsp90|Hspca|hsp4	heat shock protein 90, alpha (cytosolic), class A member 1	protein-coding	Hsp90aa1	10378848	0.00831056	0.000130539	24	4.5	0.0942998	694.283	779.168	628.836	668.813	562.871	632.982
20403	chr12-493	chr12	4592973	4593243	+	12.4	0.545	promoter-TSS (NM_001198969)	promoter-TSS (NM_001198969)	100	NM_001198969	Mm.341204	NM_011365	ENSMUSG00000020640	Itsn2	AI327390|Ese2|Sh3d1B|Sh3p18|mKIAA1256	intersectin 2	protein-coding	Itsn2	10394288	0.00831056	0.000130539	24	5.5	0.0831911	7.81431	8.10133	7.89222	7.9457	7.85449	7.79944
235497	chr9-213	chr9	75441621	75441891	+	17.5	0.69	intron (NM_001039522, intron 1 of 11)	CpG	232	NM_001039522	Mm.41508	NM_001006122	ENSMUSG00000042487	Leo1	Gm185	Leo1, Paf1/RNA polymerase II complex component	protein-coding	Leo1	10587211	0.00831056	0.000130539	24	8	0.067762	6.57198	6.52295	6.75877	6.60131	6.55277	6.47271
70999	chr19-175	chr19	7240453	7240723	+	18.2	0.738	intron (NM_027643, intron 1 of 7)	intron (NM_027643, intron 1 of 7)	634	NM_027643	Mm.329605	NM_027643	ENSMUSG00000024764	Naa40	4931433E08Rik|AU023197|Nat11	N(alpha)-acetyltransferase 40, NatD catalytic subunit	protein-coding	Naa40	10465638	0.00831056	0.000130539	24	8	0.120526	170.626	209.409	199.317	184.508	180.501	163.947
18613	chr11-385	chr11	106674644	106674914	+	19	0.783	intron (NM_001305157, intron 13 of 15)	intron (NM_001305157, intron 13 of 15)	40502	NM_001305157	Mm.343951	NM_008816	ENSMUSG00000020717	Pecam1	C85791|Cd31|PECAM-1|Pecam	platelet/endothelial cell adhesion molecule 1	protein-coding	Pecam1	10392221	0.00831056	0.000130539	24	5	0.0962726	8.70137	8.93014	8.81954	8.85141	8.52753	8.58521
242466	chr4-586	chr4	55026173	55026443	+	11.7	0.633	intron (NM_172867, intron 7 of 12)	intron (NM_172867, intron 7 of 12)	78363	NM_172867	Mm.102904	NM_172867	ENSMUSG00000060206	Zfp462	6030417H05|9430078C22Rik|Gt4-2|Zfpip	zinc finger protein 462	protein-coding	Zfp462	10505073	0.00831056	0.000130539	24	5	0.21088	429.627	435.202	502.166	381.151	342.094	384.873
11747	chr3-183	chr3	36475723	36475993	+	15.3	0.721	promoter-TSS (NR_105976)	promoter-TSS (NR_105976)	29	NM_009673	Mm.1620	NM_009673	ENSMUSG00000027712	Anxa5	Anx5|R74653	annexin A5	protein-coding	Anxa5	10497817	0.0102047	0.000175216	24	8	0.380296	702.839	1160.31	1094.99	1127.26	757.635	706.448
12190	chr5-757	chr5	150522490	150522760	+	12.4	0.677	promoter-TSS (NM_009765)	promoter-TSS (NM_009765)	4	NM_009765	Mm.236256	NM_009765	ENSMUSG00000041147	Brca2	Fancd1|RAB163	breast cancer 2, early onset	protein-coding	Brca2	10527801	0.0102047	0.000175216	24	19	0.10555	33.3413	30.8432	30.7789	32.8951	35.6846	36.7247
228410	chr2-839	chr2	104590633	104590903	+	11.7	0.667	intron (NM_001037326, intron 1 of 1)	CpG	284	NM_145529	Mm.259876	NM_145529	ENSMUSG00000027176	Cstf3	4732468G05Rik|C79532|CstF-77	cleavage stimulation factor, 3' pre-RNA, subunit 3	protein-coding	Cstf3	10474243	0.0102047	0.000175216	24	7	0.12665	76.9724	94.5195	98.3103	90.5448	81.1129	87.4617
23893	chr1-1079	chr1	174860411	174860681	+	10.2	0.824	intron (NM_011825, intron 1 of 1)	intron (NM_011825, intron 1 of 1)	61273	NM_011825	Mm.25760	NM_011825	ENSMUSG00000050069	Grem2	Gremlin2|Prdc	gremlin 2, DAN family BMP antagonist	protein-coding	Grem2	10360415	0.0102047	0.000175216	24	3	0.0711774	168.916	155.858	149.061	139.015	131.023	144.998
12370	chr1-949	chr1	58795501	58795771	+	10.2	0.75	5' UTR (NM_009812, exon 1 of 9)	5' UTR (NM_009812, exon 1 of 9)	262	NM_009812	Mm.336851	NM_009812	ENSMUSG00000026029	Casp8	CASP-8|FLICE|MACH|Mch5	caspase 8	protein-coding	Casp8	10346564	0.0124456	0.00023376	24	6	0.245309	180.737	329.666	235.952	240.977	195.314	159.855
14219	chr10-289	chr10	24595614	24595884	+	17.5	0.705	exon (NM_010217, exon 1 of 5)	exon (NM_010217, exon 1 of 5)	307	NM_010217	Mm.390287	NM_010217	ENSMUSG00000019997	Ctgf	Ccn2|Fisp12|Hcs24|fisp-12	connective tissue growth factor	protein-coding	Ctgf	10362201	0.0124456	0.00023376	24	17	0.379561	441.546	481.292	657.515	949.905	776.305	609.491
73389	chr12-190	chr12	31926779	31927049	+	16	0.694	3' UTR (NM_153198, exon 11 of 11)	3' UTR (NM_153198, exon 11 of 11)	23621	NM_153198	Mm.390461	NM_153198	ENSMUSG00000002996	Hbp1	1700058O05Rik|BE629963|C330012F01Rik|C86454	high mobility group box transcription factor 1	protein-coding	Hbp1	10399897	0.0124456	0.00023376	24	14	0.0644316	821.553	846.373	911.659	890.258	917.306	881.863
246293	chr5-349	chr5	103910870	103911140	+	17.5	0.743	intron (NM_178741, intron 1 of 9)	CpG	224	NM_178741	Mm.179871	NM_178741	ENSMUSG00000029312	Klhl8	2310001P09Rik|D5Ertd431e	kelch-like 8	protein-coding	Klhl8	10531899	0.0124456	0.00023376	24	9.5	0.0342664	224.27	225.479	238.8	250.318	240.681	213.389
218699	chr14-77	chr14	8098023	8098293	+	19	0.7	promoter-TSS (NM_145458)	promoter-TSS (NM_145458)	-55	NM_178279	Mm.29515	NM_145458	ENSMUSG00000033885	Pxk	C230080L11Rik|D14Ertd813e|MONaKA	PX domain containing serine/threonine kinase	protein-coding	Pxk	10412624	0.0124456	0.00023376	24	5	0.0975454	8.80391	8.96648	8.77439	8.84035	8.80732	8.6983
109246	chr6-245	chr6	128143772	128144042	+	16.8	0.75	promoter-TSS (NM_175414)	promoter-TSS (NM_175414)	-329	NM_175414	Mm.21814	NM_175414	ENSMUSG00000030352	Tspan9	6720474K14Rik|9430079M16Rik|AU018597	tetraspanin 9	protein-coding	Tspan9	10548128	0.0124456	0.00023376	24	9	0.125575	224.718	237.746	257.888	246.751	224.959	223.042
235320	chr9-246	chr9	48860528	48860798	+	17.5	0.774	Intergenic	Intergenic	-24718	NM_001033324	Mm.457803	NM_001033324	ENSMUSG00000066687	Zbtb16	AI467657|PLZF|Zfp145|lu	zinc finger and BTB domain containing 16	protein-coding	Zbtb16	10593225	0.0124456	0.00023376	24	0	0.324703	1395.92	1505.78	1402.03	1049.95	1205.15	1535.93
228359	chr2-674	chr2	91674917	91675187	+	12.4	0.719	3' UTR (NM_145528, exon 16 of 16)	3' UTR (NM_145528, exon 16 of 16)	21844	NM_146124	Mm.22413	NM_146124	ENSMUSG00000027247	Arhgap1	B230365D05Rik|C76222|Cdc42GAP|p50rhoGAP	Rho GTPase activating protein 1	protein-coding	Arhgap1	10473965	0.0151421	0.00031003	24	5	0.211489	164.957	213.506	209.694	199.101	159.344	158.502
76457	chr15-31	chr15	82127672	82127942	+	30.6	0.671	promoter-TSS (NM_172428)	promoter-TSS (NM_172428)	-115	NM_001326588	Mm.440373	NM_172428	ENSMUSG00000068114	Ccdc134	2310042L06Rik|AW208859	coiled-coil domain containing 134	protein-coding	Ccdc134	10425686	0.0151421	0.00031003	24	3	0.167443	8.38495	8.27873	8.13118	7.89067	7.61039	8.20823
68142	chr2-60	chr2	119477608	119477878	+	28.4	0.739	promoter-TSS (NM_026574)	promoter-TSS (NM_026574)	-114	NM_026574	Mm.330496	NM_026574	ENSMUSG00000034154	Ino80	2310079N15Rik|4632409L19Rik|Inoc1	INO80 complex subunit	protein-coding	Ino80	10486203	0.0151421	0.00031003	24	13	0.139922	288.595	297.352	319.67	371.302	341.067	311.351
387176	chr2-616	chr2	38823957	38824227	+	13.9	0.885	intron (NM_010264, intron 3 of 10)	intron (NM_010264, intron 3 of 10)	-28643	NR_029568		NR_029568	ENSMUSG00000065423	Mir181a-2	Mirn181|Mirn181a|Mirn181a-2|miR-181|mir-181a|mir-181a-2	microRNA 181a-2	ncRNA	Mir181a-2	10471878	0.0151421	0.00031003	24	16	0.220837	76.6551	64.7371	70.2258	66.1147	92.4384	88.2779
19053	chr8-916	chr8	33599945	33600215	+	10.2	0.64	intron (NM_017374, intron 1 of 6)	CpG	459	NM_017374	Mm.29301	NM_017374	ENSMUSG00000009630	Ppp2cb	AI115466|D8Ertd766e|PP2Ac	protein phosphatase 2 (formerly 2A), catalytic subunit, beta isoform	protein-coding	Ppp2cb	10571266	0.0151421	0.00031003	24	5	0.0572332	997.844	1016.07	967.662	969.979	888.495	930.253
66585	chr4-124	chr4	130389608	130389878	+	21.1	0.821	3' UTR (NM_025645, exon 10 of 10)	3' UTR (NM_025645, exon 10 of 10)	29611	NM_025645	Mm.423019	NM_025645	ENSMUSG00000074088	Snrnp40	0610009C03Rik|Prp8bp|Wdr57	small nuclear ribonucleoprotein 40 (U5)	protein-coding	Snrnp40	10608696	0.0151421	0.00031003	24	15	0.0755614	175.011	181.595	185.633	198.75	198.882	188.824
20788	chr15-151	chr15	82147219	82147489	+	18.2	0.744	promoter-TSS (NM_033218)	promoter-TSS (NM_033218)	85	NM_033218	Mm.9002	NM_033218	ENSMUSG00000022463	Srebf2	AI608257|SREBP-2|SREBP2|SREBP2gc|bHLHd2|lop13|nuc	sterol regulatory element binding factor 2	protein-coding	Srebf2	10425695	0.0151421	0.00031003	24	6	0.0889257	189.224	228.462	222.716	212.556	177.4	189.111
21929	chr10-252	chr10	19015260	19015530	+	16.8	0.646	promoter-TSS (NM_009397)	promoter-TSS (NM_009397)	15	NM_009397	Mm.116683	NM_009397	ENSMUSG00000019850	Tnfaip3	A20|Tnfip3	tumor necrosis factor, alpha-induced protein 3	protein-coding	Tnfaip3	10368144	0.0151421	0.00031003	24	5	0.111518	89.6723	83.3147	76.662	82.8902	79.4073	76.1393
432731	chr13-507	chr13	21453437	21453707	+	10.9	0.727	intron (NM_001013786, intron 1 of 3)	intron (NM_001013786, intron 1 of 3)	155	NM_001013786	Mm.390557	NM_001013786	ENSMUSG00000022228	Zscan26	BC068174|Zfp187|Znf187	zinc finger and SCAN domain containing 26	protein-coding	Zfp187	10408032	0.0151421	0.00031003	24	12	0.046365	7.91436	8.11441	8.04799	8.29847	8.19587	8.12189
77045	chr5-79	chr5	123344341	123344611	+	22.6	0.691	promoter-TSS (NM_029850)	promoter-TSS (NM_029850)	28	NM_029850	Mm.151960	NM_029850	ENSMUSG00000029438	Bcl7a	4432415N06Rik|AI448316	B cell CLL/lymphoma 7A	protein-coding	Bcl7a	10525542	0.0183135	0.00040883	24	19	0.102036	296.18	250.723	291.975	288.749	319.325	328.714
67501	chr16-465	chr16	27389057	27389327	+	10.2	0.593	intron (NM_001025615, intron 1 of 9)	CpG	236	NM_001289436	Mm.258985	NM_026202	ENSMUSG00000038127	Ccdc50	C3orf6	coiled-coil domain containing 50	protein-coding	Ccdc50	10434869	0.0183135	0.00040883	24	11	0.0677408	10.0182	10.0955	10.1901	10.268	10.0492	10.0975
63953	chr1-199	chr1	184170972	184171242	+	19.7	0.707	Intergenic	Intergenic	136646	NM_022019	Mm.404024	NM_022019	ENSMUSG00000039384	Dusp10	2610306G15Rik|AI158871|MKP-5|MKP5	dual specificity phosphatase 10	protein-coding	Dusp10	10352448	0.0183135	0.00040883	24	10.5	0.254827	614.317	815.443	978.712	900.935	922.35	696.655
78798	chr17-807	chr17	83350701	83350971	+	12.4	0.581	promoter-TSS (NM_001114361)	promoter-TSS (NM_001114361)	-95	NM_001286567	Mm.295565	NM_199466	ENSMUSG00000032624	Eml4	4930443C24Rik|AI644019	echinoderm microtubule associated protein like 4	protein-coding	Eml4	10447141	0.0183135	0.00040883	24	5	0.160287	6.60507	7.24393	6.7383	6.73034	6.61162	6.63034
216134	chr10-178	chr10	78464733	78465003	+	21.9	0.685	promoter-TSS (NM_172134)	promoter-TSS (NM_172134)	80	NM_172134	Mm.206159	NM_172134	ENSMUSG00000032788	Pdxk	2310036D04Rik|AA119688|C77999	pyridoxal (pyridoxine, vitamin B6) kinase	protein-coding	Pdxk	10370497	0.0183135	0.00040883	24	19	0.126954	202.636	197.069	185.222	209.839	217.084	225.142
237926	chr11-546	chr11	94548939	94549209	+	16	0.568	exon (NM_001013381, exon 1 of 9)	exon (NM_001013381, exon 1 of 9)	133	NM_001013381	Mm.342275	NM_001013381	ENSMUSG00000039096	Rsad1	B430319G23|BC056485	radical S-adenosyl methionine domain containing 1	protein-coding	Rsad1	10390022	0.0183135	0.00040883	24	18	0.155047	152.175	108.321	127.604	153.249	151.959	154.684
235344	chr9-189	chr9	51008655	51008925	+	16.8	0.578	exon (NM_178710, exon 1 of 16)	exon (NM_178710, exon 1 of 16)	283	NM_178710	Mm.104932	NM_178710	ENSMUSG00000037112	Sik2	G630080D20Rik|Snf1lk2	salt inducible kinase 2	protein-coding	Sik2	10593430	0.0183135	0.00040883	24	6	0.0782484	362.948	515.45	387.263	427.073	377.481	361.723
666048	chr4-878	chr4	114578395	114578665	+	10.2	0.652	intron (NM_001085549, intron 2 of 6)	intron (NM_001085549, intron 2 of 6)	171806	NM_001085549	Mm.331779	NM_001085549	ENSMUSG00000070867	Trabd2b	Gm12824|Hkat|OTTMUSG00000008561	TraB domain containing 2B	protein-coding	Gm12824	10507099	0.0183135	0.00040883	24	6	0.179223	6.44052	6.29735	6.57553	6.36267	6.22785	6.1932
12879	chr12-350	chr12	24680534	24680804	+	13.1	0.583	exon (NM_001161807, exon 1 of 5)	exon (NM_001161807, exon 1 of 5)	1126	NM_138686	Mm.52265	NM_138686	ENSMUSG00000062563	Cys1	2900006B19Rik|AV218859|Ccap|ck|cpk	cystin 1	protein-coding	Cys1	10399680	0.0220008	0.000536109	24	18	0.129047	60.6868	40.6561	51.2887	53.215	58.205	57.2832
98363	chr1-748	chr1	87270938	87271208	+	13.9	0.655	intron (NM_028889, intron 1 of 3)	intron (NM_028889, intron 1 of 3)	6709	NM_028889	Mm.247951	NM_028889	ENSMUSG00000026255	Efhd1	4931430I01Rik|AI452351|PP3051|mitocalcin	EF hand domain containing 1	protein-coding	Efhd1	10348194	0.0220008	0.000536109	24	9	0.253017	74.637	128.433	122.466	122.715	78.7769	75.4851
384783	chr8-340	chr8	11145315	11145585	+	14.6	0.719	Intergenic	Intergenic	-137020	NM_001081212	Mm.407207	NM_001081212	ENSMUSG00000038894	Irs2	Irs-2	insulin receptor substrate 2	protein-coding	Irs2	10576971	0.0220008	0.000536109	24	13	0.206115	203.302	200.712	267.692	316.074	223.887	210.384
16401	chr2-562	chr2	79149067	79149337	+	13.1	0.815	Intergenic	Intergenic	-106224	NM_010576	Mm.31903	NM_010576	ENSMUSG00000027009	Itga4	CD49D|Itga4B	integrin alpha 4	protein-coding	Itga4	10473125	0.0220008	0.000536109	24	6	0.192333	254.047	278.565	245.061	215.052	192.939	198.715
18405	chr4-336	chr4	63338483	63338753	+	16	0.8	Intergenic	Intergenic	-5938	NM_008768	Mm.4777	NM_008768	ENSMUSG00000039196	Orm1	Agp-1|Agp-2|Orm-1	orosomucoid 1	protein-coding	Orm1	10505438	0.0220008	0.000536109	24	4	0.122358	47.5232	87.01	40.6412	39.2805	36.4941	40.0539
74315	chr11-965	chr11	44518934	44519204	+	11.7	0.656	promoter-TSS (NM_001166553)	promoter-TSS (NM_001166553)	105	NM_028862	Mm.156771	NM_028862	ENSMUSG00000019189	Rnf145	3732413I11Rik|TMRF1	ring finger protein 145	protein-coding	Rnf145	10375343	0.0220008	0.000536109	24	2	0.169359	238.322	250.24	200.81	194.573	195.585	209.313
72472	chr10-429	chr10	40141628	40141898	+	16	0.625	exon (NM_028247, exon 1 of 3)	exon (NM_028247, exon 1 of 3)	491	NM_028247	Mm.186778	NM_028247	ENSMUSG00000019838	Slc16a10	2610103N14Rik|9830169E08|Mct10|PRO0813|TAT1	solute carrier family 16 (monocarboxylic acid transporters), member 10	protein-coding	Slc16a10	10368720	0.0220008	0.000536109	24	7.5	0.107105	501.175	521.868	542.707	516.925	462.814	474.193
11988	chr8-1086	chr8	40862363	40862633	+	10.2	0.593	5' UTR (NM_001044740, exon 1 of 12)	5' UTR (NM_001044740, exon 1 of 12)	131	NM_001044740	Mm.4676	NM_007514	ENSMUSG00000031596	Slc7a2	20.5|AI158848|Atrc2|CAT-2|Cat2|Tea	solute carrier family 7 (cationic amino acid transporter, y+ system), member 2	protein-coding	Slc7a2	10571444	0.0220008	0.000536109	24	21.5	0.278826	9.58818	9.30406	9.07263	9.19386	9.54737	9.57489
57915	chr5-405	chr5	64206953	64207223	+	15.3	0.893	intron (NM_001310611, intron 2 of 21)	intron (NM_001310611, intron 2 of 21)	-23269	NM_001289514	Mm.286353	NM_019636	ENSMUSG00000029174	Tbc1d1	1110062G02Rik|AI385682|AW555803|Nob1|Nobq1|Tbc1|mKIAA1108	TBC1 domain family, member 1	protein-coding	Tbc1d1	10522024	0.0220008	0.000536109	24	1	0.366062	9.75012	9.2788	9.16677	8.78451	8.95036	9.20943
21885	chr4-935	chr4	71968912	71969182	+	10.2	0.708	Intergenic	Intergenic	231846	NM_001285529	Mm.278444	NM_011599	ENSMUSG00000008305	Tle1	C230057C06Rik|Estm14|Grg-1|Grg1|Tle4l	transducin-like enhancer of split 1	protein-coding	Tle1	10513884	0.0220008	0.000536109	24	3.5	0.137596	7.57203	7.35713	7.26305	7.11497	6.97011	7.34876
78802	chr2-771	chr2	75981446	75981716	+	14.6	0.719	exon (NM_030188, exon 1 of 1)	exon (NM_030188, exon 1 of 1)	386	NM_030188	Mm.282339	NM_030188	ENSMUSG00000075271	Ttc30a1	4930506L13Rik	tetratricopeptide repeat domain 30A1	protein-coding	Ttc30a1	10483824	0.0220008	0.000536109	24	12	0.0712976	26.4035	27.8148	28.7879	30.6837	29.4899	27.3237
231148	chr5-56	chr5	35757548	35757818	+	25.5	0.708	promoter-TSS (NM_177678)	promoter-TSS (NM_177678)	-197	NM_001177697	Mm.254446	NM_177678	ENSMUSG00000029095	Ablim2	AI606905|C230091L11	actin-binding LIM protein 2	protein-coding	Ablim2	10521415	0.0264474	0.000699194	24	13.5	0.110111	8.71284	8.6121	8.82311	8.84805	8.79979	8.79309
54208	chr7-709	chr7	118129530	118129800	+	10.9	0.6	promoter-TSS (NM_019419)	promoter-TSS (NM_019419)	-40	NM_019419	Mm.29924	NM_019419	ENSMUSG00000030654	Arl6ip1	AIP-6|AL022945|ARMER|AU042858|Aip-1|Arl6ip|C85138|mKIAA0069	ADP-ribosylation factor-like 6 interacting protein 1	protein-coding	Arl6ip1	10567219	0.0264474	0.000699194	24	5	0.07711	209.448	270.987	224.459	208.089	209.189	200.674
12952	chr10-321	chr10	85184959	85185229	+	16.8	0.592	promoter-TSS (NM_007771)	promoter-TSS (NM_007771)	-40	NM_007771	Mm.26237	NM_007771	ENSMUSG00000020038	Cry1	AU020726|AU021000|Phll1	cryptochrome 1 (photolyase-like)	protein-coding	Cry1	10371400	0.0264474	0.000699194	24	1	0.0611011	184.713	171.045	164.544	139.655	167.426	167.54
17132	chr8-51	chr8	115562439	115562709	+	28.4	0.689	Intergenic	MER94|DNA|hAT-Blackjack	144320	NM_001025577	Mm.275549	NM_001025577	ENSMUSG00000055435	Maf	2810401A20Rik|A230108G15Rik|AW047063|c-maf	avian musculoaponeurotic fibrosarcoma oncogene homolog	protein-coding	Maf	10581992	0.0264474	0.000699194	24	6	0.113986	1386.85	1350.9	1369.37	1353.33	1195.58	1258.33
238564	chr13-54	chr13	32764482	32764752	+	23.3	0.733	intron (NM_001166030, intron 1 of 11)	intron (NM_001166030, intron 1 of 11)	17162	NM_001166030	Mm.60041	NM_001166030	ENSMUSG00000044951	Mylk4	EG238564	myosin light chain kinase family, member 4	protein-coding	Mylk4	10408543	0.0264474	0.000699194	24	19	0.164897	6989.14	6111.88	5411.83	6235.55	7116.74	6856.23
18087	chr9-96	chr9	121719015	121719285	+	21.1	0.633	promoter-TSS (NM_010918)	promoter-TSS (NM_010918)	-31	NM_010918	Mm.32842	NM_010918	ENSMUSG00000032525	Nktr	5330401F18Rik|D9Wsu172e	natural killer tumor recognition sequence	protein-coding	Nktr	10590389	0.0264474	0.000699194	24	8	0.0570282	391.53	385.666	405.318	426.834	364.698	359.842
227656	chr2-245	chr2	26964319	26964589	+	15.3	0.591	promoter-TSS (NM_207234)	promoter-TSS (NM_207234)	-68	NM_207234	Mm.291874	NM_207234	ENSMUSG00000052406	Rexo4	Gm111|Rex4|Xpmc2h	REX4, 3'-5' exonuclease	protein-coding	Rexo4	10481155	0.0264474	0.000699194	24	4.5	0.0644528	267.264	264.093	251.409	259.885	224.178	242.888
70097	chr10-250	chr10	8885734	8886004	+	19	0.627	5' UTR (NM_175155, exon 1 of 20)	5' UTR (NM_175155, exon 1 of 20)	201	NM_175155	Mm.338275	NM_175155	ENSMUSG00000015305	Sash1	1100001C18Rik|2500002E12Rik|A330076K04Rik|mKIAA0790	SAM and SH3 domain containing 1	protein-coding	Sash1	10367746	0.0264474	0.000699194	24	7.5	0.213575	151.772	184.626	203.32	187.117	134.495	144.087
69354	chr15-179	chr15	96915584	96915854	+	17.5	0.758	Intergenic	Intergenic	140237	NM_027052	Mm.250980	NM_027052	ENSMUSG00000022464	Slc38a4	1110012E16Rik|1700012A18Rik|Ata3|mATA3|mNAT3	solute carrier family 38, member 4	protein-coding	Slc38a4	10431915	0.0264474	0.000699194	24	6	0.0688015	1862.98	2024.43	1841.67	1916.56	1615.09	1736.3
21888	chr19-191	chr19	14598468	14598738	+	15.3	0.703	promoter-TSS (NM_011600)	promoter-TSS (NM_011600)	-420	NM_001302947	Mm.103638	NM_011600	ENSMUSG00000024642	Tle4	5730411M05Rik|AA792082|Bce-1|Bce1|ESTM13|ESTM14|Grg4|X83332|X83333|grg-4	transducin-like enhancer of split 4	protein-coding	Tle4	10466374	0.0264474	0.000699194	24	22	0.17556	8.28729	8.04557	7.95152	8.07092	8.12179	8.44335
212448	chr10-859	chr10	29211516	29211786	+	10.9	0.882	promoter-TSS (NM_001162537)	promoter-TSS (NM_001162537)	8	NM_001162537	Mm.132789	NM_001162537	ENSMUSG00000004360	9330159F19Rik	-	RIKEN cDNA 9330159F19 gene	protein-coding	9330159F19Rik	10362372	0.0316242	0.000907061	24	9.5	0.192913	614.556	644.555	747.863	763.445	616.373	561.499
240442	chr18-241	chr18	80151172	80151442	+	13.1	0.714	intron (NM_175028, intron 1 of 3)	CpG	175	NM_175028	Mm.26594	NM_175028	ENSMUSG00000053950	Adnp2	8430420L05Rik|BC024969|Kiaa0863|Zfp508|mKIAA0863	ADNP homeobox 2	protein-coding	Adnp2	10459912	0.0316242	0.000907061	24	15.5	0.0779868	66.8405	64.8907	64.1257	68.0461	73.1918	65.3479
12389	chr6-920	chr6	17359317	17359587	+	10.2	0.789	Intergenic	Intergenic	51812	NM_001243064	Mm.28278	NM_007616	ENSMUSG00000007655	Cav1	Cav|Cav-1	caveolin 1, caveolae protein	protein-coding	Cav1	10536499	0.0316242	0.000907061	24	6	0.0537401	10.5307	10.7474	10.7395	10.7669	10.3762	10.4378
57810	chr9-635	chr9	35421180	35421450	+	12.4	0.633	Intergenic	CpG	-30761	NM_021339	Mm.80509	NM_021339	ENSMUSG00000038119	Cdon	CDO|Cd0|Orcam	cell adhesion molecule-related/down-regulated by oncogenes	protein-coding	Cdon	10584208	0.0316242	0.000907061	24	8.5	0.102856	325.19	337.492	364.047	349.789	315.919	290.632
57778	chr11-272	chr11	103159044	103159314	+	20.4	0.756	Intergenic	Intergenic	-11959	NM_019679	Mm.138913	NM_019679	ENSMUSG00000055805	Fmnl1	8030453N10Rik|AI553564|Fmnl|Fnrl|Frls	formin-like 1	protein-coding	Fmnl1	10381708	0.0316242	0.000907061	24	5	0.177052	109.55	131.817	112.575	93.6859	90.5065	89.1529
12304	chr6-372	chr6	47813088	47813358	+	14.6	0.641	exon (NM_009787, exon 1 of 10)	exon (NM_009787, exon 1 of 10)	289	NM_009787	Mm.2442	NM_009787	ENSMUSG00000025823	Pdia4	AI987846|Cai|ERp-72|Erp72	protein disulfide isomerase associated 4	protein-coding	Pdia4	10544525	0.0316242	0.000907061	24	5	0.252395	278.882	343.023	297.208	294.044	254.59	256.414
20913	chr11-92	chr11	90637950	90638220	+	26.2	0.662	promoter-TSS (NM_011505)	promoter-TSS (NM_011505)	23	NM_011505	Mm.207203	NM_011505	ENSMUSG00000020546	Stxbp4	6030470M02Rik|Synip	syntaxin binding protein 4	protein-coding	Stxbp4	10389795	0.0316242	0.000907061	24	1	0.226564	1096.36	758.077	718.637	576.753	620.419	937.458
23965	chr8-972	chr8	48555056	48555326	+	10.9	0.633	intron (NM_011857, intron 2 of 28)	CpG	119499	NM_001145937	Mm.42191	NM_011857	ENSMUSG00000031561	Tenm3	2610100B16Rik|Odz1|Odz3|Ten-m3|mKIAA1455	teneurin transmembrane protein 3	protein-coding	Odz3	10578649	0.0316242	0.000907061	24	12.5	0.117963	7.80151	7.89836	8.0743	8.25695	8.03266	8.04045
22698	chr11-224	chr11	58903777	58904047	+	18.2	0.654	intron (NM_011758, intron 1 of 4)	intron (NM_011758, intron 1 of 4)	313	NM_011758	Mm.127646	NM_011758	ENSMUSG00000037001	Zfp39	CTfin33|Zfp-39	zinc finger protein 39	protein-coding	Zfp39	10386219	0.0316242	0.000907061	24	14	0.184265	128.52	123.38	143.24	153.963	166.392	147.821
668501	chr7-732	chr7	35802967	35803237	+	12.4	0.645	promoter-TSS (NM_177739)	promoter-TSS (NM_177739)	-113	NM_177739	Mm.286296	NM_177739	ENSMUSG00000044452	Zfp507	1810022O10Rik|A230056M16Rik|AL024009|AU021817|BB105092|Gm480|Znf507|mKIAA1084	zinc finger protein 507	protein-coding	Zfp507	10562523	0.0316242	0.000907061	24	13	0.0766857	203.033	190.462	213.823	240.603	218.884	214.008
668661	chr7-204	chr7	44246180	44246450	+	16.8	0.65	promoter-TSS (NM_025880)	promoter-TSS (NM_025880)	-407	NM_025880	Mm.274492	NM_025880	ENSMUSG00000045411	2410002F23Rik	-	RIKEN cDNA 2410002F23 gene	protein-coding	2410002F23Rik	10502417	0.0373613	0.00117065	24	15	0.0612708	63.3631	74.8365	74.9637	72.7734	78.5751	77.975
20928	chr6-148	chr6	142702183	142702453	+	21.1	0.842	promoter-TSS (NM_011511)	promoter-TSS (NM_011511)	-44	NM_021042	Mm.35670	NM_011511	ENSMUSG00000030249	Abcc9	AI414027|AI449286|SUR2A|SUR2B|Sur2	ATP-binding cassette, sub-family C (CFTR/MRP), member 9	protein-coding	Abcc9	10549108	0.0373613	0.00117065	24	12	0.0379716	11.0243	11.0003	11.054	11.1126	11.033	10.9736
11461	chr5-147	chr5	142916723	142916993	+	21.9	0.738	Intergenic	Intergenic	-10104	NM_007393	Mm.328431	NM_007393	ENSMUSG00000029580	Actb	Actx|E430023M04Rik|beta-actin	actin, beta	protein-coding	Actb	10535381	0.0373613	0.00117065	24	6	0.117238	6179.61	7652.42	6907.75	6797.55	5895.1	5834.93
12331	chr4-156	chr4	122885659	122885929	+	19	0.674	intron (NM_007598, intron 1 of 12)	intron (NM_007598, intron 1 of 12)	263	NM_001301067	Mm.8687	NM_007598	ENSMUSG00000028656	Cap1	-	CAP, adenylate cyclase-associated protein 1 (yeast)	protein-coding	Cap1	10516051	0.0373613	0.00117065	24	5	0.211078	8.6043	9.13177	8.88549	8.94133	8.56144	8.63528
245026	chr9-349	chr9	105819224	105819494	+	16.8	0.632	intron (NM_001102607, intron 1 of 36)	LSU-rRNA_Hsa|rRNA|rRNA	8726	NM_001102607	Mm.482507	NM_172927	ENSMUSG00000043719	Col6a6	E330019B14|E330026B02Rik	collagen, type VI, alpha 6	protein-coding	Col6a6	10596394	0.0373613	0.00117065	24	7.5	0.165873	5.8036	6.05288	6.15427	5.90865	5.82365	5.98517
213054	chr3-251	chr3	95217771	95218041	+	16	0.718	promoter-TSS (NM_172512)	promoter-TSS (NM_172512)	36	NM_172512	Mm.224820	NM_029885	ENSMUSG00000038766	Gabpb2	1810015F01Rik|5830427M07|9430006E19Rik|A430024B14Rik|AV050852|Gabpb2-1	GA repeat binding protein, beta 2	protein-coding	Gabpb2	10500103	0.0373613	0.00117065	24	4	0.0318905	7.84655	7.91586	7.83557	7.85402	7.57139	7.70649
50709	chr13-476	chr13	23622056	23622326	+	10.9	0.567	exon (NM_015787, exon 1 of 1)	exon (NM_015787, exon 1 of 1)	367	NM_015787	Mm.170587	NM_015787	ENSMUSG00000051627	Hist1h1e	H1-4|H1.4|H1e|H1f4|H1s-4|H1var2	histone cluster 1, H1e	protein-coding	Hist1h1e///Hist1h2be	10408212	0.0373613	0.00117065	24	10	0.114332	7.40878	7.44663	7.48554	7.61479	7.43594	7.14853
22779	chr1-120	chr1	69456697	69456967	+	25.5	0.809	Intergenic	(TTAGGG)n|Simple_repeat|Simple_repeat	229128	NM_011770	Mm.106343	NM_011770	ENSMUSG00000025997	Ikzf2	A730095J18Rik|Helios|Zfpn1a2|Znfn1a2	IKAROS family zinc finger 2	protein-coding	Ikzf2	10355312	0.0373613	0.00117065	24	8	0.0499642	293.133	325.729	332.576	317.957	282.334	289.049
232087	chr6-89	chr6	72439288	72439558	+	24.1	0.563	exon (NM_145569, exon 1 of 9)	exon (NM_145569, exon 1 of 9)	135	NM_145569	Mm.29815	NM_145569	ENSMUSG00000053907	Mat2a	D630045P18Rik	methionine adenosyltransferase II, alpha	protein-coding	Mat2a	10545417	0.0373613	0.00117065	24	18	0.141916	3452.92	2918.68	2981.45	3558.37	3722.1	3760.22
231327	chr5-94	chr5	76951477	76951747	+	22.6	0.679	promoter-TSS (NM_172146)	promoter-TSS (NM_172146)	-34	NM_172146	Mm.202337	NM_172146	ENSMUSG00000029246	Ppat	5730454C12Rik|AA408689|AA675351|AI507113|C79945	phosphoribosyl pyrophosphate amidotransferase	protein-coding	Ppat	10530806	0.0373613	0.00117065	24	14.5	0.102142	402.2	319.285	381.08	431.447	464.966	406.407
73296	chr13-296	chr13	75943113	75943383	+	12.4	0.595	exon (NM_028493, exon 2 of 12)	exon (NM_028493, exon 2 of 12)	576	NM_028493	Mm.276200	NM_028493	ENSMUSG00000021589	Rhobtb3	1700040C17Rik|2610033K01Rik|4930503C18Rik|AI317148|AW208826|mKIAA0878	Rho-related BTB domain containing 3	protein-coding	Rhobtb3	10410695	0.0373613	0.00117065	24	5	0.0541502	369.953	352.534	353.587	361.026	318.553	342.901
100502698	chr16-349	chr16	32868140	32868410	+	13.9	0.595	promoter-TSS (NM_001200038)	promoter-TSS (NM_001200038)	91	NM_172615	Mm.327319	NM_172615	ENSMUSG00000035629	Rubcn	1700021K19Rik|5330403K09|Kiaa0226|Rubicon|mKIAA0226	RUN domain and cysteine-rich domain containing, Beclin 1-interacting protein	protein-coding	1700021K19Rik	10439092	0.0373613	0.00117065	24	5	0.0919946	8.39298	8.36584	8.34933	8.2934	8.05814	8.21923
271221	chr14-353	chr14	75016307	75016577	+	10.9	0.633	intron (NM_198642, intron 1 of 13)	CpG	415	NM_198642	Mm.320280	NM_198642	ENSMUSG00000034959	Rubcnl	5031414D18Rik|Gm744|Gm911|Kiaa0226l	RUN and cysteine rich domain containing beclin 1 interacting protein like	protein-coding	5031414D18Rik	10416423	0.0373613	0.00117065	24	1	0.0963787	5.00688	5.29499	4.99667	4.9196	5.04717	5.13297
78787	chr14-424	chr14	20595878	20596148	+	11.7	0.692	intron (NM_030180, intron 3 of 20)	intron (NM_030180, intron 3 of 20)	22341	NM_030180	Mm.301173	NM_030180	ENSMUSG00000034235	Usp54	4930429G18Rik|AI115571|C030002J06Rik	ubiquitin specific peptidase 54	protein-coding	Usp54	10417912	0.0373613	0.00117065	24	18	0.195642	135.904	151.09	144.355	174.873	178.248	194.2
71276	chr11-523	chr11	120932571	120932841	+	16	0.636	intron (NM_027745, intron 1 of 18)	CpG	166	NM_027745	Mm.275751	NM_027745	ENSMUSG00000048445	Ccdc57	4933434G05Rik	coiled-coil domain containing 57	protein-coding	Ccdc57	10394018	0.0442516	0.00150322	24	18	0.15736	73.8912	55.767	57.257	61.0318	62.4063	63.7609
192193	chr6-665	chr6	108938468	108938738	+	11.7	0.667	Intergenic	Intergenic	109962	NM_138677	Mm.21596	NM_138677	ENSMUSG00000030104	Edem1	A130059K23Rik|EDEM|mKIAA0212	ER degradation enhancer, mannosidase alpha-like 1	protein-coding	Edem1	10540493	0.0442516	0.00150322	24	5	0.179025	163.728	257.044	188.886	192.141	165.803	167.128
14732	chr19-19	chr19	55099350	55099620	+	29.2	0.629	promoter-TSS (NM_008149)	promoter-TSS (NM_008149)	-38	NM_008149	Mm.210196	NM_008149	ENSMUSG00000024978	Gpam	GPAT|GPAT1	glycerol-3-phosphate acyltransferase, mitochondrial	protein-coding	Gpam	10468533	0.0442516	0.00150322	24	14.5	0.0767211	1328.42	1252.33	1346.13	1468.78	1464.71	1301.45
67471	chr7-438	chr7	35318191	35318461	+	14.6	0.778	intron (NM_026181, intron 1 of 19)	CpG	114	NM_026181	Mm.358705	NM_026181	ENSMUSG00000063808	Gpatch1	1300003A17Rik|ECGP|Gpatc1	G patch domain containing 1	protein-coding	Gpatch1	10562439	0.0442516	0.00150322	24	15	0.14891	106.255	94.5863	100.263	112.143	123.552	108.11
70757	chr16-146	chr16	35022333	35022603	+	15.3	0.585	promoter-TSS (NM_023587)	promoter-TSS (NM_023587)	47	NM_023587	Mm.27286	NM_023587	ENSMUSG00000035376	Hacd2	6330408J20Rik|AI255777|AI481689|Hcad2|Ptplb	3-hydroxyacyl-CoA dehydratase 2	protein-coding	Ptplb	10435383	0.0442516	0.00150322	24	4	0.131274	6.93777	7.42188	6.98382	6.90983	6.5419	6.88897
56233	chr15-15	chr15	97812154	97812424	+	37.2	0.72	intron (NM_001204275, intron 1 of 24)	intron (NM_001204275, intron 1 of 24)	2574	NM_001204281	Mm.384027	NM_019572	ENSMUSG00000022475	Hdac7	5830434K02Rik|HD7|HD7a|Hdac7a|mFLJ00062	histone deacetylase 7	protein-coding	Hdac7	10432006	0.0442516	0.00150322	24	5	0.0493136	7.72379	7.87978	7.82271	7.68698	7.51152	7.65405
15273	chr10-248	chr10	14041621	14041891	+	17.5	0.818	intron (NM_010437, intron 1 of 8)	intron (NM_010437, intron 1 of 8)	75377	NM_010437	Mm.42157	NM_010437	ENSMUSG00000015501	Hivep2	Gm20114|MIBP1|Schnurri-2|Shn-2	human immunodeficiency virus type I enhancer binding protein 2	protein-coding	Hivep2	10361807	0.0442516	0.00150322	24	20	0.165208	1079.76	850.549	834.073	908.486	898.273	1073.35
327987	chr11-619	chr11	86358066	86358336	+	15.3	0.658	promoter-TSS (NM_001080931)	promoter-TSS (NM_001080931)	-676	NM_001080931	Mm.341886	NM_001080931	ENSMUSG00000034297	Med13	1110067M05Rik|D030023K18|Thrap1|Trap240	mediator complex subunit 13	protein-coding	Med13	10389451	0.0442516	0.00150322	24	6	0.0399515	1396.89	1392.34	1398.24	1367	1252.24	1250.16
67134	chr2-238	chr2	130274133	130274403	+	18.2	0.607	promoter-TSS (NM_024193)	promoter-TSS (NM_024193)	-144	NM_024193	Mm.29363	NM_024193	ENSMUSG00000027405	Nop56	2310044F10Rik|Nol5a	NOP56 ribonucleoprotein	protein-coding	Nop56	10476093	0.0442516	0.00150322	24	17	0.139243	484.539	447.691	475.579	500.123	536.837	563.972
14628	chr10-293	chr10	42678842	42679112	+	16.8	0.588	promoter-TSS (NM_172416)	promoter-TSS (NM_172416)	61	NM_172416	Mm.46636	NM_172416	ENSMUSG00000038280	Ostm1	1200002H13Rik|HSPC019|gl	osteopetrosis associated transmembrane protein 1	protein-coding	Ostm1	10362829	0.0442516	0.00150322	24	8	0.0751867	529.002	535.043	565.577	583.658	516.964	513.681
18442	chr7-186	chr7	101011836	101012106	+	19.7	0.554	promoter-TSS (NM_001302347)	promoter-TSS (NM_001302347)	27	NM_001302347	Mm.3000	NM_008773	ENSMUSG00000032860	P2ry2	P2U1|P2Y2	purinergic receptor P2Y, G-protein coupled 2	protein-coding	P2ry2	10565962	0.0442516	0.00150322	24	15	0.276861	9.34728	8.81441	9.36254	9.63506	9.55819	9.32045
93742	chr8-672	chr8	127318863	127319133	+	11.7	0.667	intron (NM_001309391, intron 4 of 24)	intron (NM_001309391, intron 4 of 24)	19346	NM_001013580	Mm.299254	NM_033620	ENSMUSG00000025812	Pard3	AA960621|AI256638|Asip|D8Ertd580e|Par-3|Par3|Pard-3|Pard3a|Phip	par-3 family cell polarity regulator	protein-coding	Pard3	10576610	0.0442516	0.00150322	24	9.5	0.0820244	8.10623	8.1265	8.16827	8.24906	8.05227	8.01452
207728	chr7-62	chr7	101460624	101460894	+	27.7	0.75	intron (NM_001243758, intron 2 of 30)	intron (NM_001243758, intron 2 of 30)	9507	NM_001243757	Mm.247564	NM_001008548	ENSMUSG00000030653	Pde2a	CGS-PDE|cGSPDE	phosphodiesterase 2A, cGMP-stimulated	protein-coding	Pde2a	10555510	0.0442516	0.00150322	24	8	0.194617	8.57357	8.71356	8.84186	8.78553	8.43605	8.43868
19016	chr6-1006	chr6	115361080	115361350	+	8.75	0.652	promoter-TSS (NM_001308352)	promoter-TSS (NM_001308352)	71	NM_001308352	Mm.3020	NM_011146	ENSMUSG00000000440	Pparg	Nr1c3|PPAR-gamma|PPAR-gamma2|PPARgamma|PPARgamma2	peroxisome proliferator activated receptor gamma	protein-coding	Pparg	10540897	0.0442516	0.00150322	24	6	0.160082	7.53431	8.17068	7.63545	7.73699	7.47057	7.47297
76438	chr17-539	chr17	50190211	50190481	+	14.6	0.719	5' UTR (NM_181397, exon 1 of 10)	5' UTR (NM_181397, exon 1 of 10)	151	NM_181397	Mm.41854	NM_181397	ENSMUSG00000039316	Rftn1	2310015N21Rik|AI853526	raftlin lipid raft linker 1	protein-coding	Rftn1	10451710	0.0442516	0.00150322	24	8	0.191195	145.511	176.3	157.599	168.378	137.743	126.795
56470	chr2-561	chr2	181693638	181693908	+	14.6	0.727	promoter-TSS (NM_001291208)	promoter-TSS (NM_001291208)	37	NM_001291208	Mm.274366	NM_026446	ENSMUSG00000002458	Rgs19	2610042F04Rik|AI324841|AW547781|GAIP	regulator of G-protein signaling 19	protein-coding	Rgs19	10490736	0.0442516	0.00150322	24	5	0.229838	6.79355	7.14705	6.80016	6.56632	6.46053	6.55317
227522	chr2-66	chr2	3332618	3332888	+	26.2	0.639	promoter-TSS (NM_001013376)	promoter-TSS (NM_001013376)	-125	NM_001013376	Mm.293948	NM_001013376	ENSMUSG00000049950	Rpp38	C330006A15Rik	ribonuclease P/MRP 38 subunit	protein-coding	Rpp38	10479749	0.0442516	0.00150322	24	15	0.145982	642.201	609.702	676.746	778.682	779.751	766.6
67161	chr3-147	chr3	41742301	41742571	+	16	0.707	promoter-TSS (NM_001081411)	promoter-TSS (NM_001081411)	78	NM_001081411	Mm.331001	NM_026008	ENSMUSG00000059834	Sclt1	2610207F23Rik|4931421F20Rik	sodium channel and clathrin linker 1	protein-coding	Sclt1	10497971	0.0442516	0.00150322	24	11	0.0752362	5.45978	5.43459	5.47635	5.59875	5.59655	5.47397
272589	chr9-1232	chr9	42471810	42472080	+	8.75	0.682	intron (NM_173038, intron 1 of 7)	intron (NM_173038, intron 1 of 7)	281	NM_173038	Mm.34483	NM_173038	ENSMUSG00000037287	Tbcel	D330014K23|E130107N23Rik|Lrrc35	tubulin folding cofactor E-like	protein-coding	Tbcel	10592618	0.0442516	0.00150322	24	13	0.128552	201.361	208.527	241.859	255.929	226.955	218.879
21834	chr14-525	chr14	17910584	17910854	+	10.2	0.696	intron (NM_001113417, intron 2 of 9)	intron (NM_001113417, intron 2 of 9)	-70925	NM_009380	Mm.32563	NM_009380	ENSMUSG00000021779	Thrb	Nr1a2|T3R[b]|T3Rbeta|Thrb1|Thrb2|c-erbAbeta	thyroid hormone receptor beta	protein-coding	Thrb	10412882	0.0442516	0.00150322	24	13	0.17841	216.675	224.944	233.823	292.313	256.567	232.032
29820	chr14-505	chr14	61046337	61046607	+	10.2	0.643	5' UTR (NM_013869, exon 1 of 10)	5' UTR (NM_013869, exon 1 of 10)	383	NM_013869	Mm.281356	NM_013869	ENSMUSG00000060548	Tnfrsf19	AL023044|AW123854|TAJ|TAJ-ALPHA|TRADE|Troy	tumor necrosis factor receptor superfamily, member 19	protein-coding	Tnfrsf19	10420596	0.0442516	0.00150322	24	9	0.22235	149.842	154.459	198.663	156.832	152.757	134.249
213988	chr15-73	chr15	80714310	80714580	+	21.9	0.705	intron (NM_144812, intron 1 of 24)	intron (NM_144812, intron 1 of 24)	3132	NM_144812	Mm.131328	NM_144812	ENSMUSG00000047888	Tnrc6b	2700090M07Rik|A730065C02Rik|AI848765|D230019K20Rik	trinucleotide repeat containing 6b	protein-coding	Tnrc6b	10425430	0.0442516	0.00150322	24	12	0.0139583	694.928	728.3	718.194	845.312	738.334	742.095
78751	chr2-163	chr2	128967049	128967319	+	19	0.667	promoter-TSS (NM_178404)	promoter-TSS (NM_178404)	-218	NM_178404	Mm.26377	NM_178404	ENSMUSG00000042851	Zc3h6	4631426G04Rik|4833425H18Rik|AU024389|AW060453|Zc3hdc6|mKIAA2035	zinc finger CCCH type containing 6	protein-coding	Zc3h6	10475941	0.0442516	0.00150322	24	17	0.189927	178.543	158.394	179.692	182.839	200.918	238.504
72611	chr5-403	chr5	145231448	145231718	+	15.3	0.61	promoter-TSS (NM_028298)	promoter-TSS (NM_028298)	-132	NM_001083958	Mm.206555	NM_028298	ENSMUSG00000007812	Zfp655	2700038I16Rik|9030409O18Rik|mKIAA4222	zinc finger protein 655	protein-coding	Zfp655	10527475	0.0442516	0.00150322	24	14	0.116326	7.25046	7.31841	7.30154	7.35572	7.36916	7.3825
100177	chr4-234	chr4	127077162	127077432	+	16.8	0.612	promoter-TSS (NM_177462)	promoter-TSS (NM_177462)	-86	NM_001285887	Mm.276096	NM_177462	ENSMUSG00000042408	Zmym6	9330177P20Rik|AI593204|AI661340|D4Wsu24e|Zfp258	zinc finger, MYM-type 6	protein-coding	Zmym6	10508228	0.0442516	0.00150322	24	14	0.135376	6.69758	6.76924	6.54382	6.90619	6.90417	6.83949
105501	chr14-155	chr14	54254071	54254341	+	16.8	0.532	promoter-TSS (NM_001205181)	promoter-TSS (NM_001205181)	77	NM_001205181	Mm.28771	NM_134076	ENSMUSG00000040997	Abhd4	1110035H23Rik|AI429574|Abh4	abhydrolase domain containing 4	protein-coding	Abhd4	10415021	0.0521571	0.00192078	24	12	0.0802354	7.76887	7.82758	7.85591	8.14734	7.91299	7.78685
71985	chr5-232	chr5	121660308	121660578	+	16.8	0.604	promoter-TSS (NM_001289543)	promoter-TSS (NM_001289543)	67	NM_028037	Mm.45423	NM_028037	ENSMUSG00000029456	Acad10	2410021P16Rik	acyl-Coenzyme A dehydrogenase family, member 10	protein-coding	Acad10	10533367	0.0521571	0.00192078	24	16.5	0.0989207	68.8722	65.7414	66.6905	72.0831	73.2273	71.0499
224697	chr17-794	chr17	33524095	33524365	+	11.7	0.655	non-coding (NR_137626, exon 1 of 23)	non-coding (NR_137626, exon 1 of 23)	145	NR_137627	Mm.29304	NM_172619	ENSMUSG00000024299	Adamts10	9430006O18|AW045948|Adam-ts10|Adamts-10|Znmp	a disintegrin-like and metallopeptidase (reprolysin type) with thrombospondin type 1 motif, 10	protein-coding	Adamts10	10443949	0.0521571	0.00192078	24	5	0.0192545	7.44007	7.46649	7.62035	7.33762	7.12472	7.47819
16801	chr7-279	chr7	24919720	24919990	+	16.8	0.839	intron (NM_001130150, intron 16 of 30)	intron (NM_001130150, intron 16 of 30)	15509	NM_001130152	Mm.3181	NM_008488	ENSMUSG00000040940	Arhgef1	Lbcl2|Lsc	Rho guanine nucleotide exchange factor (GEF) 1	protein-coding	Arhgef1	10551030	0.0521571	0.00192078	24	5	0.0836154	7.03659	7.15102	7.10163	6.97588	7.03714	7.05377
11881	chr13-367	chr13	93771783	93772053	+	12.4	0.7	exon (NM_009712, exon 1 of 8)	exon (NM_009712, exon 1 of 8)	239	NM_009712	Mm.300178	NM_009712	ENSMUSG00000042082	Arsb	1110007C02Rik|AI480648|As-1|As-1r|As-1s|As-1t|As1|As1-r|As1-s|As1-t|Asr-1|Ast-1	arylsulfatase B	protein-coding	Arsb	10406663	0.0521571	0.00192078	24	6	0.116715	124.102	161.973	154.754	150.584	128.411	125.288
17064	chr2-1832	chr2	148520609	148520879	+	8.02	0.75	Intergenic	Intergenic	-77209	NM_010740	Mm.681	NM_010740	ENSMUSG00000027435	Cd93	6030404G09Rik|AA145088|AA4.1|AW555904|C1qr1|C1qrp|Ly68	CD93 antigen	protein-coding	Cd93	10488382	0.0521571	0.00192078	24	9	0.32365	494.165	524.428	650.935	591.068	419.821	390.057
55985	chr5-983	chr5	95994138	95994408	+	12.4	0.9	Intergenic	L1_Mus1|LINE|L1	37334	NM_018866	Mm.10116	NM_018866	ENSMUSG00000023078	Cxcl13	4631412M08Rik|ANGIE2|Angie|BCA-1|BLC|BLR1L|Scyb13	chemokine (C-X-C motif) ligand 13	protein-coding	Cxcl13	10523359	0.0521571	0.00192078	24	4.5	0.172538	122.829	1212.69	90.4595	91.2005	88.9831	91.448
75560	chr5-129	chr5	110770403	110770673	+	20.4	0.706	5' UTR (NM_029337, exon 1 of 52)	5' UTR (NM_029337, exon 1 of 52)	179	NM_029337	Mm.270487	NM_029337	ENSMUSG00000029505	Ep400	1700020J09Rik|AU023439|mDomino|mKIAA1498|p400	E1A binding protein p400	protein-coding	Ep400	10532407	0.0521571	0.00192078	24	7	0.115166	188.282	250.589	224.878	221.454	197.754	209.482
241128	chr1-580	chr1	80224837	80225107	+	14.6	0.714	Intergenic	Intergenic	-11028	NM_173425	Mm.145511	NM_173425	ENSMUSG00000043230	Fam124b	A830043J08Rik	family with sequence similarity 124, member B	protein-coding	Fam124b	10355998	0.0521571	0.00192078	24	4	0.113844	26.8031	30.1129	28.0323	25.0723	22.9112	24.2164
71865	chr10-295	chr10	11280722	11280992	+	15.3	0.574	promoter-TSS (NM_027968)	promoter-TSS (NM_027968)	-473	NM_027968	Mm.276229	NM_027968	ENSMUSG00000047648	Fbxo30	1700026A16Rik|MUSA1	F-box protein 30	protein-coding	Fbxo30	10361748	0.0521571	0.00192078	24	12	0.130426	246.136	265.839	320.047	388.174	281.513	255.141
14236	chr17-251	chr17	88440651	88440921	+	16.8	0.544	promoter-TSS (NM_180974)	promoter-TSS (NM_180974)	74	NM_180974	Mm.112824	NM_180974	ENSMUSG00000034998	Foxn2	3230402J05Rik|6030465J18Rik|Fkh19|Foxn1|HTLF	forkhead box N2	protein-coding	Foxn2	10447431	0.0521571	0.00192078	24	10.5	0.0790899	194.589	208.343	215.344	214.907	211.148	194.218
114142	chr6-502	chr6	14901328	14901598	+	12.4	0.778	5' UTR (NM_053242, exon 1 of 19)	5' UTR (NM_053242, exon 1 of 19)	114	NM_053242	Mm.332919	NM_053242	ENSMUSG00000029563	Foxp2	2810043D05Rik|AI449000|CAG-16|D0Kist7	forkhead box P2	protein-coding	Foxp2	10536444	0.0521571	0.00192078	24	9.5	0.0490308	80.3118	84.5229	86.2056	84.7952	84.1622	82.9304
78816	chr8-814	chr8	69809110	69809380	+	10.9	0.762	intron (NM_198101, intron 1 of 20)	intron (NM_198101, intron 1 of 20)	558	NM_198101	Mm.324305	NM_198101	ENSMUSG00000036246	Gmip	5031419I10Rik	Gem-interacting protein	protein-coding	Gmip	10572212	0.0521571	0.00192078	24	4.5	0.0827704	52.3875	57.3973	48.0166	50.6138	45.6085	47.1939
76832	chr9-199	chr9	35569772	35570042	+	19	0.564	5' UTR (NM_029762, exon 1 of 4)	5' UTR (NM_029762, exon 1 of 4)	162	NM_029762	Mm.482285	NM_029762	ENSMUSG00000050555	Hyls1	3010015K02Rik	hydrolethalus syndrome 1	protein-coding	Hyls1	10592154	0.0521571	0.00192078	24	5	0.0247417	22.3263	28.9107	24.6992	24.4817	24.1035	23.5113
68016	chr4-272	chr4	48754804	48755074	+	16.8	0.793	Intergenic	Intergenic	91425	NM_026509	Mm.133444	NM_026509	ENSMUSG00000028348	Murc	2310039E09Rik	muscle-related coiled-coil protein	protein-coding	Murc	10504902	0.0521571	0.00192078	24	8.5	0.092631	720.817	743.537	796.621	817.633	692.423	689.946
67111	chr5-393	chr5	92277741	92278011	+	15.3	0.641	intron (NM_025972, intron 1 of 10)	CpG	305	NM_025972	Mm.28890	NM_025972	ENSMUSG00000029413	Naaa	2210023K21Rik|3830414F09Rik|Asahl	N-acylethanolamine acid amidase	protein-coding	Naaa	10531370	0.0521571	0.00192078	24	5	0.115223	209.857	301.742	225.047	215.17	230.755	209.876
320024	chr3-80	chr3	27182851	27183121	+	20.4	0.577	promoter-TSS (NM_178772)	promoter-TSS (NM_178772)	-18	NM_178772	Mm.24576	NM_178772	ENSMUSG00000027698	Nceh1	Aadacl1|B230106I24Rik|CPO-BP|Nceh	neutral cholesterol ester hydrolase 1	protein-coding	Nceh1	10491083	0.0521571	0.00192078	24	14.5	0.323494	345.938	383.058	495.287	744.553	533.077	447.012
94190	chrX-114	chrX	98890797	98891067	+	8.02	0.6	promoter-TSS (NM_052976)	promoter-TSS (NM_052976)	93	NM_052976	Mm.33536	NM_052976	ENSMUSG00000031214	Ophn1	C130037N19Rik|Wtgr	oligophrenin 1	protein-coding	Ophn1	10605884	0.0521571	0.00192078	24	7	0.182702	109.594	136.656	134.671	128.02	110.917	111.229
226849	chr1-40	chr1	191435484	191435754	+	30.6	0.882	Intergenic	Intergenic	-38578	NM_144880	Mm.205569	NM_144880	ENSMUSG00000026626	Ppp2r5a	PR61alpha	protein phosphatase 2, regulatory subunit B', alpha	protein-coding	Ppp2r5a	10361104	0.0521571	0.00192078	24	6	0.106547	901.448	1038.87	956.102	935.841	816.093	877.947
14057	chr13-674	chr13	54072158	54072428	+	10.2	0.531	intron (NM_027324, intron 1 of 10)	CpG	448	NM_027324	Mm.134191	NM_027324	ENSMUSG00000021474	Sfxn1	2810002O05Rik|A930015P12Rik|f	sideroflexin 1	protein-coding	Sfxn1	10405236	0.0521571	0.00192078	24	5.5	0.315483	99.2015	178.335	124.164	126.451	99.852	100.566
20623	chr9-283	chr9	122109828	122110098	+	16.8	0.735	Intergenic	Intergenic	-7303	NM_133741	Mm.257989	NM_133741	ENSMUSG00000038145	Snrk	2010012F07Rik|AI448042|AW547029|E030034B15|R74830|mKIAA0096	SNF related kinase	protein-coding	Snrk	10590445	0.0521571	0.00192078	24	17	0.176897	747.459	765.31	725.444	972.618	951.447	862.805
219189	chr14-20	chr14	78972477	78972747	+	31.3	0.878	intron (NM_173758, intron 12 of 25)	intron (NM_173758, intron 12 of 25)	123434	NM_173758	Mm.159651	NM_027906	ENSMUSG00000058997	Vwa8	1300010F03Rik|4932416F07Rik|AI957255|Kiaa0564|mKIAA0564	von Willebrand factor A domain containing 8	protein-coding	1300010F03Rik	10416588	0.0521571	0.00192078	24	13	0.056915	9.92486	9.93118	10.0302	10.0662	10.0052	9.95955
237775	chr11-529	chr11	59472156	59472426	+	16	0.727	intron (NM_178417, intron 1 of 3)	CpG	183	NM_178417	Mm.339604	NM_178417	ENSMUSG00000054519	Zfp867	-	zinc finger protein 867	protein-coding	Zfp867	10386394	0.0521571	0.00192078	24	11	0.142991	37.4346	46.0433	48.5645	56.3358	48.1806	44.0024
72949	chr1-109	chr1	127774172	127774442	+	21.9	0.581	promoter-TSS (NR_045298)	promoter-TSS (NR_045298)	143	NM_028399	Mm.268672	NM_028399	ENSMUSG00000026349	Ccnt2	2900041I18Rik|C81304|CycT2|CycT2a|CycT2b	cyclin T2	protein-coding	Ccnt2	10349442	0.0610847	0.00244254	24	15	0.151879	593.474	540.762	603.709	688.747	700.033	608.946
13350	chr15-230	chr15	76511793	76512063	+	17.5	0.593	promoter-TSS (NM_010046)	promoter-TSS (NM_010046)	-110	NM_010046	Mm.22633	NM_010046	ENSMUSG00000022555	Dgat1	ARAT|C75990|D15Ertd23e|Dgat	diacylglycerol O-acyltransferase 1	protein-coding	Dgat1	10429926	0.0610847	0.00244254	24	6.5	0.105182	228.384	259.173	229.925	229.063	208.975	212.053
14085	chr7-906	chr7	84605462	84605732	+	10.9	0.75	intron (NM_010176, intron 1 of 13)	intron (NM_010176, intron 1 of 13)	345	NM_010176	Mm.3798	NM_010176	ENSMUSG00000030630	Fah	-	fumarylacetoacetate hydrolase	protein-coding	Fah	10565315	0.0610847	0.00244254	24	5	0.13476	86.3982	136.812	96.2624	84.486	77.5653	84.3882
14360	chr10-400	chr10	39370015	39370285	+	16	0.587	5' UTR (NM_008054, exon 1 of 14)	5' UTR (NM_008054, exon 1 of 14)	351	NM_001122892	Mm.4848	NM_008054	ENSMUSG00000019843	Fyn	AI448320|AW552119	Fyn proto-oncogene	protein-coding	Fyn	10362596	0.0610847	0.00244254	24	5	0.174443	6.86723	7.45689	7.19851	7.12475	6.90664	6.86903
15976	chr16-305	chr16	91372707	91372977	+	12.4	0.75	promoter-TSS (NM_010509)	promoter-TSS (NM_010509)	59	NM_001347258	Mm.6834	NM_010509	ENSMUSG00000022971	Ifnar2	AI747302|Ifnar-2	interferon (alpha and beta) receptor 2	protein-coding	Ifnar2	10436830	0.0610847	0.00244254	24	5.5	0.141577	7.81801	8.25595	7.93698	8.00117	7.8629	7.75301
109241	chr2-340	chr2	48949930	48950200	+	16.8	0.743	promoter-TSS (NM_001177313)	promoter-TSS (NM_001177313)	557	NM_029924	Mm.440436	NM_029924	ENSMUSG00000036792	Mbd5	9430004D19Rik|AA536666|AI426407|C030040A15Rik|Gm1630|OTTMUSG00000012483	methyl-CpG binding domain protein 5	protein-coding	Mbd5	10471967	0.0610847	0.00244254	24	9	0.117528	195.897	209.041	215.302	229.912	181.579	198.855
211666	chr3-198	chr3	51701469	51701739	+	16	0.629	intron (NM_001004176, intron 2 of 4)	intron (NM_001004176, intron 2 of 4)	40425	NM_174995	Mm.24679	NM_174995	ENSMUSG00000074604	Mgst2	GST2|MGST-II	microsomal glutathione S-transferase 2	protein-coding	Mgst2	10491952	0.0610847	0.00244254	24	0	0.0390747	32.1668	31.6164	30.7461	29.3214	31.236	31.6315
380718	chr11-661	chr11	87853106	87853376	+	16	0.719	promoter-TSS (NM_001039684)	promoter-TSS (NM_001039684)	16	NM_001039684	Mm.24404	NM_001039684	ENSMUSG00000034121	Mks1	AK190930|B8d3	Meckel syndrome, type 1	protein-coding	Mks1	10380189	0.0610847	0.00244254	24	16	0.0693884	52.3581	48.8809	55.4952	51.5932	59.2113	49.8945
232157	chr6-41	chr6	83325888	83326158	+	32.1	0.729	promoter-TSS (NM_145571)	promoter-TSS (NM_145571)	-16	NM_145571	Mm.29500	NM_145571	ENSMUSG00000043131	Mob1a	4022402H07Rik|MOB1|MOB4B|Mobk1b|Mobkl1b	MOB kinase activator 1A	protein-coding	Mob1a	10539421	0.0610847	0.00244254	24	5.5	0.120477	152.624	213.51	159.146	167.822	151.744	157.124
236604	chr11-33	chr11	3100341	3100611	+	72.9	0.846	Intergenic	GSAT_MM|Satellite|Satellite	-23545	NR_003517	Mm.247625	NM_001004146		Pisd-ps1	-	phosphatidylserine decarboxylase, pseudogene 1	pseudo	Pisd-ps1///Pisd-ps3	10373702	0.0610847	0.00244254	24	2	0.119819	7.62899	7.60394	7.52822	7.38047	7.54006	7.556
19024	chr7-181	chr7	107592745	107593015	+	17.5	0.694	Intergenic	Intergenic	-2171	NM_008905	Mm.2817	NM_008905	ENSMUSG00000036528	Ppfibp2	Cclp1	PTPRF interacting protein, binding protein 2 (liprin beta 2)	protein-coding	Ppfibp2	10556082	0.0610847	0.00244254	24	9	0.239228	165.016	174.226	212.684	212.331	150.006	148.092
331004	chr9-964	chr9	94670345	94670615	+	11.7	0.696	intron (NM_177909, intron 1 of 15)	intron (NM_177909, intron 1 of 15)	588	NM_177909	Mm.326125	NM_177909	ENSMUSG00000031129	Slc9a9	5730527A11Rik|9930105B05|AI854429|Nhe9	solute carrier family 9 (sodium/hydrogen exchanger), member 9	protein-coding	Slc9a9	10587854	0.0610847	0.00244254	24	5	0.0623597	92.1052	159.203	101.635	106.008	98.709	84.9911
71900	chr6-100	chr6	13069635	13069905	+	21.1	0.714	promoter-TSS (NM_027992)	promoter-TSS (NM_027992)	11	NM_027992	Mm.27742	NM_027992	ENSMUSG00000029571	Tmem106b	2310036D22Rik|5830455K21Rik|6430519M21Rik|AI428776|AI661344	transmembrane protein 106B	protein-coding	Tmem106b	10536429	0.0610847	0.00244254	24	11	0.0998081	600.005	601.833	608.697	705.631	626.183	557.489
212167	chr5-861	chr5	21144500	21144770	+	12.4	0.708	Intergenic	MLT1N2|LTR|ERVL-MaLR	-41632	NM_175437	Mm.121705	NM_175437	ENSMUSG00000039934	Gsap	A530088I07Rik|Pion	gamma-secretase activating protein	protein-coding	Pion	10519951	0.0690653	0.002767	24	5	0.102375	5.74008	6.0566	6.00563	5.78835	5.67718	5.80984
18789	chr12-182	chr12	105784569	105784839	+	18.2	0.698	promoter-TSS (NM_001347440)	promoter-TSS (NM_001347440)	7	NM_011112	Mm.255877	NM_011112	ENSMUSG00000021111	Papola	Pap|PapIII|Plap	poly (A) polymerase alpha	protein-coding	Papola	10398147	0.0690653	0.002767	24	6	0.0828729	1341.47	1391.77	1303.7	1396.69	1228.43	1204.4
71914	chr5-566	chr5	98030356	98030626	+	12.4	0.622	exon (NM_133738, exon 1 of 17)	exon (NM_133738, exon 1 of 17)	471	NM_133738	Mm.24842	NM_133738	ENSMUSG00000029338	Antxr2	2310046B19Rik|AW561899|CMG-2|CMG2|cI-35	anthrax toxin receptor 2	protein-coding	Antxr2	10531560	0.0712878	0.00309146	24	9	0.196569	352.051	457.406	417.974	411.537	369.167	334.882
214137	chr3-117	chr3	121967731	121968001	+	19	0.732	intron (NM_172525, intron 1 of 22)	intron (NM_172525, intron 1 of 22)	14540	NM_172525	Mm.229287	NM_172525	ENSMUSG00000039831	Arhgap29	6720461J18Rik|A830014I19|AU040217|B130017I01Rik|C76601|Parg1	Rho GTPase activating protein 29	protein-coding	Arhgap29	10495685	0.0712878	0.00309146	24	6.5	0.201656	227.025	298.805	278.148	289.396	217.777	229.238
64945	chr5-444	chr5	5514339	5514609	+	14.6	0.675	intron (NM_001193660, intron 1 of 4)	CpG	315	NM_001193660	Mm.40132	NM_022890	ENSMUSG00000046798	Cldn12	-	claudin 12	protein-coding	Cldn12	10527965	0.0712878	0.00309146	24	17	0.205775	8.05557	7.76301	8.01014	8.00649	8.22767	8.28986
13876	chr16-657	chr16	95612865	95613135	+	9.48	0.75	Intergenic	(GTGTG)n|Simple_repeat|Simple_repeat	-26407	NM_001302152	Mm.164531	NM_133659	ENSMUSG00000040732	Erg	D030036I24Rik	avian erythroblastosis virus E-26 (v-ets) oncogene related	protein-coding	Erg	10441093	0.0712878	0.00309146	24	12	0.123991	6.89466	6.87443	7.16803	7.3097	7.09024	6.89858
14048	chr1-1201	chr1	14304600	14304870	+	8.75	0.6	intron (NM_001310459, intron 1 of 17)	intron (NM_001310459, intron 1 of 17)	5464	NM_001310459	Mm.250185	NM_010164	ENSMUSG00000025932	Eya1	bor	EYA transcriptional coactivator and phosphatase 1	protein-coding	Eya1	10353192	0.0712878	0.00309146	24	7	0.0661357	9.68762	9.7163	9.82775	9.7657	9.45626	9.59281
67468	chr11-64	chr11	90276639	90276909	+	33.5	0.877	exon (NM_026178, exon 7 of 7)	exon (NM_026178, exon 7 of 7)	27298	NM_026178	Mm.277518	NM_026178	ENSMUSG00000003948	Mmd	1200017E07Rik|1810073C06Rik|AA690185	monocyte to macrophage differentiation-associated	protein-coding	Mmd	10380289	0.0712878	0.00309146	24	6.5	0.235431	168.365	270.347	156.754	183.311	147.685	152.289
66234	chr8-151	chr8	64733411	64733681	+	21.1	0.755	promoter-TSS (NM_025436)	promoter-TSS (NM_025436)	32	NM_025436	Mm.30119	NM_025436	ENSMUSG00000031604	Msmo1	1500001G16Rik|C78600|DESP4|ERG25|Sc4mol	methylsterol monoxygenase 1	protein-coding	Sc4mol	10578916	0.0712878	0.00309146	24	5.5	0.215293	6.80115	7.01164	7.08727	6.93133	6.76923	6.75214
12457	chr3-108	chr3	51224570	51224840	+	17.5	0.625	5' UTR (NM_009834, exon 1 of 3)	5' UTR (NM_009834, exon 1 of 3)	258	NM_009834	Mm.86541	NM_009834	ENSMUSG00000023087	Noct	AU043840|Ccr4|Ccrn4l	nocturnin	protein-coding	Ccrn4l	10491915	0.0712878	0.00309146	24	20	0.238479	8.00595	7.61214	7.79542	7.83063	7.85195	8.17303
19223	chr2-68	chr2	167268038	167268308	+	26.2	0.788	Intergenic	PB1D7|SINE|Alu	-27636	NM_008968	Mm.2339	NM_008968	ENSMUSG00000017969	Ptgis	Cyp8|Cyp8a1|Pgis	prostaglandin I2 (prostacyclin) synthase	protein-coding	Ptgis	10489878	0.0712878	0.00309146	24	17	0.123878	112.651	123.862	127.141	130.527	139.854	133.116
66302	chr4-308	chr4	19575161	19575431	+	16	0.523	exon (NM_025476, exon 1 of 10)	exon (NM_025476, exon 1 of 10)	230	NM_025476	Mm.440686	NM_025476	ENSMUSG00000028229	Rmdn1	Fam82b|RMD-1	regulator of microtubule dynamics 1	protein-coding	Fam82b	10503484	0.0712878	0.00309146	24	13	0.110853	7.80461	7.75399	7.8818	8.07512	7.91076	7.85952
338359	chr10-270	chr10	62449707	62449977	+	16	0.538	promoter-TSS (NM_181423)	promoter-TSS (NM_181423)	-149	NM_181423	Mm.235898	NM_181423	ENSMUSG00000020079	Supv3l1	6330443E10Rik	suppressor of var1, 3-like 1 (S. cerevisiae)	protein-coding	Supv3l1	10369586	0.0712878	0.00309146	24	15	0.0771948	206.666	178.343	207.647	215.39	214.898	217.522
216198	chr10-54	chr10	84576953	84577223	+	24.1	0.646	intron (NM_146008, intron 1 of 9)	CpG	141	NM_146008	Mm.296142	NM_146008	ENSMUSG00000020034	Tcp11l2	E430026E19Rik	t-complex 11 (mouse) like 2	protein-coding	Tcp11l2	10365344	0.0712878	0.00309146	24	14	0.125985	200.218	219.364	204.865	271.363	253.155	234.867
21676	chr7-1512	chr7	112595158	112595428	+	8.75	0.632	Intergenic	Intergenic	-84027	NM_009346	Mm.24685	NM_009346	ENSMUSG00000055320	Tead1	2610024B07Rik|B230114H05Rik|Gtrgeo5|TEAD-1|TEF-1|Tcf13|mTEF-1	TEA domain family member 1	protein-coding	Tead1	10556442	0.0712878	0.00309146	24	9.5	0.106137	1641.39	1747.04	1861.05	1873.73	1633.56	1602.82
22339	chr17-22	chr17	45911487	45911757	+	39.4	0.685	Intergenic	Intergenic	113541	NM_001110268	Mm.282184	NM_009505	ENSMUSG00000023951	Vegfa	Vegf|Vpf	vascular endothelial growth factor A	protein-coding	Vegfa	10451198	0.0712878	0.00309146	24	7.5	0.043982	10.2068	10.1559	10.5025	10.433	10.0991	10.1495
99382	chr2-423	chr2	103577787	103578057	+	16	0.857	intron (NM_178890, intron 1 of 16)	intron (NM_178890, intron 1 of 16)	11612	NM_178890	Mm.35850	NM_178890	ENSMUSG00000032724	Abtb2	AW539457|BPOZ-2	ankyrin repeat and BTB (POZ) domain containing 2	protein-coding	Abtb2	10474181	0.0833197	0.00389482	24	6	0.0981323	144.14	161.914	184.847	171.232	130.93	139.314
12228	chr16-533	chr16	78427766	78428036	+	9.48	0.636	Intergenic	Intergenic	-50720	NM_001297747	Mm.392910	NM_009770	ENSMUSG00000022863	Btg3	ANA|tob5	B cell translocation gene 3	protein-coding	Btg3///Gm7334	10440419	0.0833197	0.00389482	24	8	0.053825	6.68753	6.72151	6.79374	6.74348	6.74026	6.60764
69743	chr4-91	chr4	148752807	148753077	+	22.6	0.706	Intergenic	Intergenic	-51450	NM_027195	Mm.233879	NM_027195	ENSMUSG00000028977	Casz1	2410019P08Rik|AV096627|BC040081|Cst|D4Ertd432e	castor zinc finger 1	protein-coding	Casz1	10510422	0.0833197	0.00389482	24	12.5	0.0991293	237.047	212.035	261.93	285.435	241.462	237.565
74440	chr8-443	chr8	117314611	117314881	+	13.9	0.686	intron (NM_001163262, intron 1 of 20)	intron (NM_001163262, intron 1 of 20)	-34424	NM_028941	Mm.233181	NM_028941	ENSMUSG00000034390	Cmip	4933407C03Rik|5830471E12Rik|AI314065|AI464126	c-Maf inducing protein	protein-coding	4933407C03Rik	10575777	0.0833197	0.00389482	24	6	0.138473	7.50117	7.7331	7.60712	7.5843	7.32677	7.37814
22350	chr17-565	chr17	6782647	6782917	+	12.4	0.568	promoter-TSS (NM_009510)	promoter-TSS (NM_009510)	-2	NM_009510	Mm.277812	NM_009510	ENSMUSG00000052397	Ezr	AW146364|R75297|Vil2|p81	ezrin	protein-coding	Ezr	10447602	0.0833197	0.00389482	24	4	0.087858	120.63	132.217	111.958	104.533	105.74	107.607
268709	chr14-17	chr14	8286677	8286947	+	35.7	0.829	Intergenic	Intergenic	22964	NM_183187	Mm.256058	NM_183187	ENSMUSG00000021750	Fam107a	DRR1	family with sequence similarity 107, member A	protein-coding	Fam107a	10417561	0.0833197	0.00389482	24	19	0.0936422	90.6233	89.4618	85.9306	97.6474	100.456	117.229
213056	chr1-653	chr1	58585915	58586185	+	13.9	0.667	promoter-TSS (NM_025597)	promoter-TSS (NM_025597)	104	NM_001310599	Mm.26272	NM_172513	ENSMUSG00000038174	Fam126b	C130065N10Rik|D1Ertd53e|D630010C10	family with sequence similarity 126, member B	protein-coding	Fam126b	10354868	0.0833197	0.00389482	24	19	0.133742	7.7226	7.58397	7.47959	7.60276	7.73198	7.7919
14388	chr8-116	chr8	80879468	80879738	+	23.3	0.627	exon (NM_001301298, exon 1 of 11)	exon (NM_001301298, exon 1 of 11)	876	NM_021356	Mm.277409	NM_021356	ENSMUSG00000031714	Gab1	AA408973|AW107238	growth factor receptor bound protein 2-associated protein 1	protein-coding	Gab1	10579925	0.0833197	0.00389482	24	17	0.0235113	464.962	439.811	462.372	497.309	470.881	472.457
268977	chr17-349	chr17	75005624	75005894	+	15.3	0.512	5' UTR (NM_019919, exon 1 of 34)	5' UTR (NM_019919, exon 1 of 34)	230	NM_019919	Mm.269747	NM_019919	ENSMUSG00000001870	Ltbp1	9430031G15Rik|9830146M04|Ltbp-1|Ltbp1L|TGF-beta1-BP-1|Tgfb|b2b1000Clo	latent transforming growth factor beta binding protein 1	protein-coding	Ltbp1	10446928	0.0833197	0.00389482	24	12	0.0456225	168.223	192.952	201.607	199.282	195.948	199.995
94112	chr16-316	chr16	17722511	17722781	+	12.4	0.541	intron (NM_001285886, intron 1 of 16)	CpG	254	NM_001285886	Mm.208970	NM_033609	ENSMUSG00000012114	Med15	A230074L19Rik|AW536074|Pcqap|mPcqap	mediator complex subunit 15	protein-coding	Med15	10438198	0.0833197	0.00389482	24	13	0.108308	7.84008	7.92409	7.9986	8.07219	8.04592	7.98494
56690	chr8-42	chr8	119394785	119395055	+	29.2	0.61	promoter-TSS (NM_019966)	promoter-TSS (NM_019966)	28	NM_019966	Mm.423037	NM_019966	ENSMUSG00000074064	Mlycd	AI324784|Mcd	malonyl-CoA decarboxylase	protein-coding	Mlycd	10575867	0.0833197	0.00389482	24	13.5	0.150522	204.214	179.788	212.746	248.558	219.753	190.21
102103	chr8-121	chr8	41133872	41134142	+	21.9	0.686	promoter-TSS (NM_001005863)	promoter-TSS (NM_001005863)	-281	NM_001005863	Mm.149438	NM_001005863	ENSMUSG00000045636	Mtus1	AI481402|ATBP135|Atip1|B430010I23Rik|B430305I03Rik|C85752|Cctsg1-440|MD44|MTSG1|mKIAA1288	mitochondrial tumor suppressor 1	protein-coding	Mtus1	10578324	0.0833197	0.00389482	24	14.5	0.0526901	465.52	438.56	459.235	486.427	475.928	498.787
214854	chr1-992	chr1	36287639	36287909	+	10.2	0.708	Intergenic	Intergenic	-14349	NM_153408	Mm.389110	NM_153408	ENSMUSG00000047180	Neurl3	2010300P06Rik|Lincr	neuralized E3 ubiquitin protein ligase 3	protein-coding	Neurl3	10353844	0.0833197	0.00389482	24	4	0.100317	98.7042	139.118	111.572	102.828	91.9234	97.9837
57342	chr7-1132	chr7	112427937	112428207	+	11.7	0.594	exon (NM_020606, exon 1 of 13)	exon (NM_020606, exon 1 of 13)	366	NM_020606	Mm.143763	NM_020606	ENSMUSG00000030770	Parva	2010012A22Rik|5430400F08Rik|AI225929|AU042898|Actp|CH-ILKBP|Parvin	parvin, alpha	protein-coding	Parva	10556426	0.0833197	0.00389482	24	10	0.127753	218.406	251.613	257.126	260.61	228.692	216.824
56535	chr10-339	chr10	13553027	13553297	+	15.3	0.595	promoter-TSS (NM_019961)	promoter-TSS (NM_019961)	-20	NM_001164195	Mm.282711	NM_019961	ENSMUSG00000019809	Pex3	1700014F15Rik|2810027F19Rik|2900010N04Rik	peroxisomal biogenesis factor 3	protein-coding	Pex3	10367960	0.0833197	0.00389482	24	12	0.0880843	7.81471	8.14298	8.16469	8.17822	8.12542	8.04012
108099	chr5-3	chr5	24973199	24973469	+	88.2	0.884	intron (NM_145401, intron 3 of 15)	intron (NM_145401, intron 3 of 15)	22419	NM_001310480	Mm.33649	NM_145401	ENSMUSG00000028944	Prkag2	2410051C13Rik|AAKG|AAKG2|AI854673|H91620p|WPWS	protein kinase, AMP-activated, gamma 2 non-catalytic subunit	protein-coding	Prkag2	10528702	0.0833197	0.00389482	24	5	0.0620274	7.73117	7.85555	7.67421	7.73503	7.64345	7.51904
74173	chr12-1	chr12	3109796	3110066	+	3844.1	0.684	Intergenic	GSAT_MM|Satellite|Satellite	-125860	NR_015551	Mm.309774	NM_028796	ENSMUSG00000079179	Rab10os	1700012B15Rik|1810036A22Rik	RAB10, member RAS oncogene family, opposite strand	ncRNA	1700012B15Rik	10394144	0.0833197	0.00389482	24	13.5	0.0975878	6.29658	6.31495	6.39033	6.44919	6.5143	6.3996
192786	chr11-338	chr11	54522691	54522961	+	17.5	0.612	promoter-TSS (NM_001252494)	promoter-TSS (NM_001252494)	-19	NM_001252496	Mm.254404	NM_175258	ENSMUSG00000037533	Rapgef6	A530068K01|AI844632|BB085664|C030018K18Rik|PDZ-GEF2|Pdzgef2|RA-GEF-2|Ragef2|mKIAA4052	Rap guanine nucleotide exchange factor (GEF) 6	protein-coding	Rapgef6	10376163	0.0833197	0.00389482	24	6	0.24719	7.27359	7.79344	7.48677	7.35198	7.22351	7.25758
19735	chr1-86	chr1	144003973	144004243	+	24.1	0.638	promoter-TSS (NM_009061)	promoter-TSS (NM_009061)	41	NM_009061	Mm.28262	NM_009061	ENSMUSG00000026360	Rgs2	GOS8	regulator of G-protein signaling 2	protein-coding	Rgs2	10358389	0.0833197	0.00389482	24	5.5	0.205577	92.5833	124.745	102.462	108.902	91.9552	74.7313
69780	chr4-684	chr4	121017001	121017271	+	13.1	0.647	5' UTR (NM_133716, exon 1 of 10)	5' UTR (NM_133716, exon 1 of 10)	111	NM_133716	Mm.271819	NM_133716	ENSMUSG00000032870	Smap2	1810031K02Rik|AA408614|Smap1l	small ArfGAP 2	protein-coding	Smap2	10515994	0.0833197	0.00389482	24	5	0.0248477	249.069	293.751	275.405	270.242	251.691	256.935
20868	chr11-238	chr11	32532890	32533160	+	20.4	0.694	promoter-TSS (NM_009288)	promoter-TSS (NM_009288)	-241	NM_009288	Mm.8235	NM_009288	ENSMUSG00000020272	Stk10	Gek1|Lok|mKIAA4026	serine/threonine kinase 10	protein-coding	Stk10	10375083	0.0833197	0.00389482	24	6	0.354515	91.5965	127.84	109.874	104.845	84.2783	83.3771
621976	chr13-161	chr13	41605691	41605961	+	16.8	0.647	promoter-TSS (NM_001163572)	promoter-TSS (NM_001163572)	-390	NM_001163572	Mm.259830	NM_001163572	ENSMUSG00000087370	Tmem170b	EG621976	transmembrane protein 170B	protein-coding	Tmem170b	10404763	0.0833197	0.00389482	24	7.5	0.0470085	727.342	730.581	795.308	745.751	712.166	702.478
76867	chr1-849	chr1	82316682	82316952	+	11.7	0.724	intron (NM_029777, intron 1 of 6)	CpG	238	NM_029777	Mm.226994	NM_029777	ENSMUSG00000026142	Rhbdd1	4930418P06Rik|RRP4|mRHBDD1	rhomboid domain containing 1	protein-coding	Rhbdd1	10347796	0.0936518	0.00438987	24	11	0.0749109	169.311	166.854	189.595	195.26	175.382	174.681
56752	chr1-17	chr1	167340173	167340443	+	42.3	0.841	Intergenic	LSU-rRNA_Hsa|rRNA|rRNA	-9683	NM_019993	Mm.292539	NM_019993	ENSMUSG00000026687	Aldh9a1	AA139417|Abaldh|ESTM40|TMABA-DH|Tmabadh	aldehyde dehydrogenase 9, subfamily A1	protein-coding	Aldh9a1	10351414	0.0966279	0.00488493	24	14	0.216544	150.688	170.098	179.624	209.543	194.558	167.752
12313	chr12-11	chr12	100199376	100199646	+	38.6	0.632	promoter-TSS (NM_009790)	promoter-TSS (NM_009790)	76	NM_009790	Mm.285993	NM_009790	ENSMUSG00000001175	Calm1	AI256814|AI327027|AI461935|AL024000|CaM|Calm	calmodulin 1	protein-coding	Calm1	10397752	0.0966279	0.00488493	24	6	0.0293449	4374.19	4384.21	4189.9	4243.09	3907.96	4204.45
208846	chr12-147	chr12	71831021	71831291	+	16.8	0.605	promoter-TSS (NM_026102)	promoter-TSS (NM_026102)	88	NM_172464	Mm.87417	NM_026102	ENSMUSG00000034574	Daam1	-	dishevelled associated activator of morphogenesis 1	protein-coding	Daam1	10396278	0.0966279	0.00488493	24	5	0.136677	7.8411	7.95525	7.94602	7.90067	7.503	7.51717
224014	chr16-405	chr16	16599631	16599901	+	10.9	0.533	intron (NM_001301817, intron 1 of 16)	CpG	212	NM_001301817	Mm.256131	NM_139232	ENSMUSG00000022788	Fgd4	9030023J02Rik|9330209B17Rik|Frabp|ZFYVE6	FYVE, RhoGEF and PH domain containing 4	protein-coding	Fgd4	10438017	0.0966279	0.00488493	24	9.5	0.118851	7.76281	7.85328	7.97468	8.14518	7.79281	7.73426
56458	chr3-96	chr3	52422913	52423183	+	18.2	0.737	Intergenic	Intergenic	154711	NM_019739	Mm.29891	NM_019739	ENSMUSG00000044167	Foxo1	AI876417|Afxh|FKHR|Fkhr1|Foxo1a	forkhead box O1	protein-coding	Foxo1	10491962	0.0966279	0.00488493	24	0	0.17549	378.986	400.609	342.047	345.66	316.359	464.424
110355	chr19-260	chr19	4333761	4334031	+	13.9	0.727	intron (NM_001001984, intron 12 of 20)	intron (NM_001001984, intron 12 of 20)	-27674	NM_001290818	Mm.254144	NM_130863	ENSMUSG00000024858	Grk2	Adrbk-1|Adrbk1|Bark-1|beta ARK|betaARK1	G protein-coupled receptor kinase 2	protein-coding	Adrbk1	10464704	0.0966279	0.00488493	24	5	0.0501197	8.85116	9.07327	8.85824	8.86905	8.84136	8.76572
382034	chr8-22	chr8	120449623	120449893	+	41.6	0.747	Intergenic	Intergenic	-39108	NM_198671	Mm.334856	NM_198671	ENSMUSG00000031822	Gse1	2210013I18Rik|mKIAA0182	genetic suppressor element 1, coiled-coil protein	protein-coding	Gse1	10576010	0.0966279	0.00488493	24	2.5	0.107392	289.699	246.146	226.391	239.148	218.994	247.04
208715	chr13-52	chr13	119690009	119690279	+	27.7	0.702	promoter-TSS (NM_001291439)	promoter-TSS (NM_001291439)	-207	NM_145942	Mm.61526	NM_145942	ENSMUSG00000093930	Hmgcs1	B130032C06Rik	3-hydroxy-3-methylglutaryl-Coenzyme A synthase 1	protein-coding	Hmgcs1	10412466	0.0966279	0.00488493	24	7	0.0799667	323.742	369.669	383.598	367.126	348.46	333.532
380614	chr3-264	chr3	40550178	40550448	+	16	0.658	intron (NM_175515, intron 1 of 15)	intron (NM_175515, intron 1 of 15)	9546	NM_175515	Mm.105309	NM_175515	ENSMUSG00000060798	Intu	9230116I04Rik|9430087H23Rik|Pdzd6|Pdzk6|mKIAA1284	inturned planar cell polarity protein	protein-coding	Intu	10491753	0.0966279	0.00488493	24	16	0.100897	48.5366	43.9466	45.3129	51.9132	51.5328	49.0075
16795	chr8-736	chr8	73618857	73619127	+	10.9	0.708	Intergenic	L1VL2|LINE|L1	-265452	NM_010687	Mm.324371	NM_010687	ENSMUSG00000004383	Large1	BPFD#36|Gyltl1a|Large|Mbp-1|Mbp1|enr|fg|froggy|myd	LARGE xylosyl- and glucuronyltransferase 1	protein-coding	Large	10579744	0.0966279	0.00488493	24	13	0.147333	8.63069	8.65911	8.86747	9.03783	8.73801	8.78632
100041546	chr15-1	chr15	75086656	75086926	+	258.1	0.706	Intergenic	Intergenic	25158	NM_001099217	Mm.482110	NM_001099217	ENSMUSG00000022584	Ly6c2	Ly-6C.2|Ly-6C2	lymphocyte antigen 6 complex, locus C2	protein-coding	Ly6c2	10429573	0.0966279	0.00488493	24	23	0.155634	1411.39	1473.98	1495.69	1230.9	1277.67	1518.57
240396	chr18-146	chr18	73573651	73573921	+	15.3	0.718	intron (NM_001039214, intron 1 of 1)	CpG	1081	NM_001039214	Mm.24131	NM_001039214	ENSMUSG00000037253	Mex3c	A130001D14Rik|BC035207|BM-013|Rkhd2	mex3 RNA binding family member C	protein-coding	Mex3c	10456579	0.0966279	0.00488493	24	6.5	0.0584282	487.281	501.282	463.473	510.158	438.539	477.551
18198	chr4-462	chr4	58285744	58286014	+	14.6	0.606	promoter-TSS (NM_010944)	promoter-TSS (NM_010944)	-83	NM_010944	Mm.16148	NM_010944	ENSMUSG00000057280	Musk	Mdk4|Mlk|Nsk1|Nsk2|Nsk3	muscle, skeletal, receptor tyrosine kinase	protein-coding	Musk	10505145	0.0966279	0.00488493	24	19.5	0.206942	1062.17	848.1	823.092	1038.94	1186.17	1210.51
18569	chr19-359	chr19	53867318	53867588	+	12.4	0.769	TTS (NM_001170847)	TTS (NM_001170847)	-24778	NM_011050	Mm.1605	NM_011050	ENSMUSG00000024975	Pdcd4	D19Ucla1|Ma3|Tis	programmed cell death 4	protein-coding	Pdcd4	10463997	0.0966279	0.00488493	24	13	0.262584	457.536	584.861	552.282	696.032	650.105	502.57
212127	chr3-110	chr3	53463571	53463841	+	19	0.725	promoter-TSS (NM_172501)	promoter-TSS (NM_172501)	-111	NM_173382	Mm.491292	NM_173382	ENSMUSG00000049504	Proser1	2810046L04Rik|9330161F11	proline and serine rich 1	protein-coding	2810046L04Rik	10491977	0.0966279	0.00488493	24	12	0.062289	8.71031	8.71509	8.90959	8.9131	8.73601	8.78617
69159	chr15-315	chr15	98881006	98881276	+	14.6	0.688	intron (NM_026967, intron 1 of 7)	CpG	273	NM_026967	Mm.259708	NM_026967	ENSMUSG00000023755	Rhebl1	1810036J22Rik|Rheb2	Ras homolog enriched in brain like 1	protein-coding	Rhebl1	10432362	0.0966279	0.00488493	24	16	0.166	32.2914	27.0805	33.6518	32.6894	34.6864	39.6426
114716	chr11-713	chr11	19601599	19601869	+	14.6	0.724	Intergenic	Intergenic	-322708	NM_033523	Mm.266627	NM_033523	ENSMUSG00000045671	Spred2	C79158	sprouty-related, EVH1 domain containing 2	protein-coding	Spred2	10374455	0.0966279	0.00488493	24	9.5	0.14123	196.045	204.984	229.117	236.235	182.887	189.135
20384	chr12-40	chr12	80945426	80945696	+	24.1	0.661	promoter-TSS (NM_001079694)	promoter-TSS (NM_001079694)	62	NM_001347415	Mm.43331	NM_009159	ENSMUSG00000021134	Srsf5	Sfrs5	serine/arginine-rich splicing factor 5	protein-coding	Srsf5	10508490	0.0966279	0.00488493	24	13	0.169798	8.48516	8.76692	8.81797	9.07551	9.00278	8.65785
217410	chr12-235	chr12	15979313	15979583	+	15.3	0.649	Intergenic	Intergenic	-162663	NM_144551	Mm.491136	NM_144551	ENSMUSG00000020601	Trib2	AW319517|TRB-2|TRB2	tribbles pseudokinase 2	protein-coding	Trib2	10399470	0.0966279	0.00488493	24	8	0.210796	240.633	261.789	282.883	266.223	215.028	215.064
13549	chr7-20	chr7	28180012	28180282	+	40.1	0.722	promoter-TSS (NM_001271370)	promoter-TSS (NM_001271370)	-169	NM_001271370	Mm.57249	NM_010092	ENSMUSG00000002409	Dyrk1b	Mirk	dual-specificity tyrosine-(Y)-phosphorylation regulated kinase 1b	protein-coding	Dyrk1b	10551469	0.108443	0.00549239	24	17	0.0646296	10.2633	10.002	10.0999	10.1874	10.2125	10.2107
71093	chr6-50	chr6	72254808	72255078	+	28.4	0.662	Intergenic	Intergenic	-19366	NM_153778	Mm.87449	NM_153778	ENSMUSG00000037621	Atoh8	4933425C05Rik|Hath6|Math6|bHLHa21|okadin	atonal bHLH transcription factor 8	protein-coding	Atoh8	10545372	0.111763	0.00609984	24	21	0.0831487	136.915	114.019	117.16	127.928	111.878	144.344
17470	chr16-203	chr16	45352964	45353234	+	13.9	0.722	Intergenic	(TCTG)n|Simple_repeat|Simple_repeat	55954	NM_010818	Mm.245851	NM_010818	ENSMUSG00000022661	Cd200	Mox2|OX2	CD200 antigen	protein-coding	Cd200	10439651	0.111763	0.00609984	24	20.5	0.100915	245.657	198.717	208.604	195.399	215.034	232.707
13614	chr13-53	chr13	42436639	42436909	+	22.6	0.981	Intergenic	(CCCTAA)n|Simple_repeat|Simple_repeat	135298	NM_010104	Mm.14543	NM_010104	ENSMUSG00000021367	Edn1	ET-1|PPET1|preproET	endothelin 1	protein-coding	Edn1	10404783	0.111763	0.00609984	24	0.5	0.0395061	89.9082	76.8882	88.2302	57.918	78.1449	79.5142
207375	chrX-77	chrX	151344246	151344516	+	8.75	0.529	exon (NM_198105, exon 1 of 16)	exon (NM_198105, exon 1 of 16)	158	NM_198105	Mm.391339	NM_198105	ENSMUSG00000025262	Fam120c	D930001I21Rik|ORF34	family with sequence similarity 120, member C	protein-coding	Fam120c	10602454	0.111763	0.00609984	24	11.5	0.0655276	192.869	199.609	212.851	226.068	209.685	205.274
235493	chr9-552	chr9	74952998	74953268	+	13.1	0.622	promoter-TSS (NM_001113283)	promoter-TSS (NM_001113283)	80	NM_001113283	Mm.208955	NM_153584	ENSMUSG00000034858	Fam214a	6330415I01Rik|AI553555|C130047D21Rik|Kiaa1370|mKIAA1370	family with sequence similarity 214, member A	protein-coding	BC031353	10587085	0.111763	0.00609984	24	13.5	0.21955	8.16749	8.30866	8.54535	8.72461	8.71562	8.51993
231670	chr5-606	chr5	117976763	117977033	+	12.4	0.621	exon (NM_001346588, exon 1 of 12)	exon (NM_001346588, exon 1 of 12)	128	NM_145564	Mm.21912	NM_145564	ENSMUSG00000032898	Fbxo21	2810425J22Rik|AU016673	F-box protein 21	protein-coding	Fbxo21	10524941	0.111763	0.00609984	24	13.5	0.0851074	265.813	270.972	309.928	320.884	304.378	286.408
227331	chr1-178	chr1	87327327	87327597	+	20.4	0.648	intron (NM_146112, intron 1 of 28)	CpG	464	NM_146112	Mm.23065	NM_146112	ENSMUSG00000048000	Gigyf2	2610016F01Rik|A830080H02Rik|AI852361|AW259676|BC006835|Tnrc15|mKIAA0642	GRB10 interacting GYF protein 2	protein-coding	Gigyf2	10348201	0.111763	0.00609984	24	8	0.0531532	457.732	475.579	477.048	483.499	455.479	434.505
66790	chr8-10	chr8	13213925	13214195	+	59.8	0.8	Intergenic	Intergenic	-13436	NM_025768	Mm.34901	NM_025768	ENSMUSG00000038515	Grtp1	5430401C05Rik|C81211|Tbc1d6	GH regulated TBC protein 1	protein-coding	Grtp1	10577114	0.111763	0.00609984	24	8	0.133898	145.096	150.045	166.035	148.79	128.426	126.918
382522	chr11-520	chr11	58953913	58954183	+	16.8	0.649	promoter-TSS (NM_178218)	promoter-TSS (NM_178218)	464	NR_134309	Mm.377898	NR_134309	ENSMUSG00000080712	Hist3h2bb-ps	4930534G10Rik|4933432H21|B2Hist3h2bb|Hist3h2bb|R75370	histone cluster 3, H2bb, pseudogene	pseudo	Hist3h2bb-ps	10386236	0.111763	0.00609984	24	14	0.0333684	54.6091	52.296	51.5164	55.4544	53.8622	57.4008
16195	chr13-162	chr13	112464249	112464519	+	16.8	0.562	intron (NM_010560, intron 1 of 16)	CpG	314	NM_010560	Mm.4364	NM_010560	ENSMUSG00000021756	Il6st	5133400A03Rik|AA389424|BB405851|CD130|D13Ertd699e|gp130	interleukin 6 signal transducer	protein-coding	Il6st	10407173	0.111763	0.00609984	24	10.5	0.0775696	1643.78	1688.59	1695.39	1719.65	1584.71	1563.21
15900	chr8-350	chr8	120735839	120736109	+	17.5	0.711	promoter-TSS (NM_008320)	promoter-TSS (NM_008320)	-384	NM_008320	Mm.334861	NM_008320	ENSMUSG00000041515	Irf8	AI893568|ICSBP|IRF-8|Icsbp1|Myls	interferon regulatory factor 8	protein-coding	Irf8	10576034	0.111763	0.00609984	24	5	0.092631	130.884	156.208	111.458	112.233	113.584	118.055
78286	chr7-124	chr7	49246033	49246303	+	20.4	0.72	promoter-TSS (NM_175272)	promoter-TSS (NM_175272)	-21	NM_175272	Mm.333881	NM_175272	ENSMUSG00000052512	Nav2	5330421F07Rik|AU067780|BQ960892|HELAD1|POMFIL2|RAINB1|RAINB2|Unc53H2|mKIAA3015	neuron navigator 2	protein-coding	Nav2	10553354	0.111763	0.00609984	24	8	0.187037	175.19	193.993	210.295	197.259	161.495	161.562
78928	chr2-1822	chr2	164517888	164518158	+	8.75	0.75	Intergenic	Intergenic	20498	NM_133779	Mm.28228	NM_133779	ENSMUSG00000017721	Pigt	2510012P17Rik|4930534E15Rik|CGI-06|NDAP|Ndap7	phosphatidylinositol glycan anchor biosynthesis, class T	protein-coding	Pigt	10478508	0.111763	0.00609984	24	8.5	0.0410263	560.034	573.262	582.054	618.689	571.865	520.084
56695	chr1-561	chr1	74340375	74340645	+	13.9	0.731	intron (NM_019999, intron 1 of 8)	intron (NM_019999, intron 1 of 8)	7900	NM_019999	Mm.384726	NM_019999	ENSMUSG00000026179	Pnkd	2210013N15Rik|2810403H05Rik|AI854243|Brp17|MNCb-5687|MR-1|Tahccp2	paroxysmal nonkinesiogenic dyskinesia	protein-coding	Pnkd	10347310	0.111763	0.00609984	24	8	0.0838417	194.616	202.185	253.756	206.384	175.318	189.414
71607	chr8-133	chr8	88587252	88587522	+	31.3	0.917	intron (NM_001163660, intron 4 of 7)	(CCCTAA)n|Simple_repeat|Simple_repeat	48741	NM_027840	Mm.270607	NM_027840	ENSMUSG00000031662	Snx20	9130017C17Rik	sorting nexin 20	protein-coding	Snx20	10580504	0.111763	0.00609984	24	6	0.144985	71.9199	77.0835	70.9869	70.4926	62.3916	60.6443
20683	chr15-43	chr15	102391191	102391461	+	28.4	0.824	Intergenic	4.5SRNA|scRNA|scRNA	-14990	NM_013672	Mm.4618	NM_013672	ENSMUSG00000001280	Sp1	1110003E12Rik|AA450830|AI845540|Sp1-1	trans-acting transcription factor 1	protein-coding	Sp1	10427214	0.111763	0.00609984	24	11.5	0.111447	198.005	225.303	229.088	244.868	205.095	213.88
20846	chr1-599	chr1	52113701	52113971	+	14.6	0.656	Intergenic	CpG	-5602	NM_001205314	Mm.277406	NM_009283	ENSMUSG00000026104	Stat1	2010005J02Rik|AA408197	signal transducer and activator of transcription 1	protein-coding	Stat1	10346191	0.111763	0.00609984	24	5	0.189936	7.41376	7.79394	7.5777	7.76058	7.48179	7.25389
21881	chr14-11	chr14	30559324	30559594	+	35.7	0.778	intron (NM_009388, intron 2 of 13)	intron (NM_009388, intron 2 of 13)	10328	NM_009388	Mm.290692	NM_009388	ENSMUSG00000021957	Tkt	p68	transketolase	protein-coding	Tkt	10413542	0.111763	0.00609984	24	5.5	0.144151	80.3519	126.993	79.4409	78.7659	70.3632	74.5827
83921	chr19-185	chr19	21778300	21778570	+	16	0.574	promoter-TSS (NM_031997)	promoter-TSS (NM_031997)	95	NM_001033759	Mm.329776	NM_031997	ENSMUSG00000024754	Tmem2	-	transmembrane protein 2	protein-coding	Tmem2	10462005	0.111763	0.00609984	24	10	0.0559958	7.50898	7.46501	7.64086	7.75944	7.5161	7.53726
94185	chr17-533	chr17	43016533	43016803	+	13.1	0.561	5' UTR (NM_178589, exon 1 of 6)	5' UTR (NM_178589, exon 1 of 6)	113	NM_178589	Mm.200792	NM_178589	ENSMUSG00000023915	Tnfrsf21	AA959878|DR6|R74815|TR7	tumor necrosis factor receptor superfamily, member 21	protein-coding	Tnfrsf21	10445241	0.111763	0.00609984	24	16	0.156483	844.867	717.92	866.106	952.001	862.308	907.674
94092	chr11-164	chr11	62820708	62820978	+	21.9	0.607	exon (NM_053169, exon 1 of 6)	exon (NM_053169, exon 1 of 6)	590	NM_053169	Mm.117087	NM_053169	ENSMUSG00000047821	Trim16	9130006M08Rik|AI482483|EBBP	tripartite motif-containing 16	protein-coding	Trim16	10376899	0.111763	0.00609984	24	16	0.0808506	525.691	433.976	506.922	537.723	543.381	554.606
53424	chr8-203	chr8	125012681	125012951	+	18.2	0.592	promoter-TSS (NM_016909)	promoter-TSS (NM_016909)	-181	NM_016909	Mm.5248	NM_016909	ENSMUSG00000056820	Tsnax	R74833|Trax	translin-associated factor X	protein-coding	Tsnax	10576532	0.111763	0.00609984	24	12.5	0.036469	383.523	385.709	420.462	461.325	388.214	383.109
227449	chr1-1375	chr1	105971594	105971864	+	9.48	0.773	Intergenic	Intergenic	-18677	NM_001122676	Mm.210188	NM_001122675	ENSMUSG00000038866	Zcchc2	9930114B20Rik|AW212015	zinc finger, CCHC domain containing 2	protein-coding	Zcchc2	10349065	0.111763	0.00609984	24	3.5	0.0673307	8.33987	8.35408	8.15515	8.27558	8.08308	8.41239
71163	chr7-1156	chr7	27804600	27804870	+	10.2	0.792	Intergenic	Intergenic	-2461	NM_027703	Mm.440493	NM_027703	ENSMUSG00000030604	Zfp626	4833408D11Rik|4933426I21Rik|7630402I04Rik	zinc finger protein 626	protein-coding	Zfp626	10551423	0.111763	0.00609984	24	13	0.0965554	101.363	117.622	113.407	132.931	124.149	128.161
11477	chr2-93	chr2	58532304	58532574	+	24.8	0.818	intron (NM_007394, intron 2 of 11)	intron (NM_007394, intron 2 of 11)	34389	NM_001110204	Mm.689	NM_007394	ENSMUSG00000026836	Acvr1	ALK2|ActR-I|ActRIA|Acvr|Acvrlk2|Alk-2|Alk8|D330013D15Rik|SKR1|Tsk7L	activin A receptor, type 1	protein-coding	Acvr1	10482824	0.128197	0.00758419	24	5	0.0738149	8.40682	8.43338	8.57277	8.34394	8.16828	8.30243
100504663	chr14-443	chr14	47568259	47568529	+	9.48	0.515	promoter-TSS (NM_172599)	promoter-TSS (NM_172599)	40	NM_172599	Mm.287279	NM_172599	ENSMUSG00000037526	Atg14	4832427M01|Atg14L|D14Ertd114e|D14Ertd436e	autophagy related 14	protein-coding	Atg14	10419343	0.128197	0.00758419	24	13	0.141252	98.9666	105.425	109.301	133.816	109.634	114.489
12804	chr4-18	chr4	41700077	41700347	+	35	0.725	Intergenic	Intergenic	-3121	NM_016673	Mm.425178	NM_016673	ENSMUSG00000028444	Cntfr	Cntfralpha	ciliary neurotrophic factor receptor	protein-coding	Cntfr	10512279	0.128197	0.00758419	24	1	0.0842942	618.414	471.629	389.308	425.304	380.906	454.353
67579	chr11-454	chr11	31870550	31870820	+	16	0.744	promoter-TSS (NM_026252)	promoter-TSS (NM_026252)	-255	NM_001290676	Mm.339792	NM_026252	ENSMUSG00000020300	Cpeb4	Cpe-bp4|Cpeb-4|mCPEB-4	cytoplasmic polyadenylation element binding protein 4	protein-coding	Cpeb4	10375002	0.128197	0.00758419	24	6	0.0881974	9.85471	9.70352	9.84256	9.81528	9.54811	9.70783
99480	chr3-303	chr3	122274349	122274619	+	14.6	0.605	promoter-TSS (NM_153806)	promoter-TSS (NM_153806)	70	NM_153806	Mm.398647	NM_153806	ENSMUSG00000039756	Dnttip2	4930588M11Rik|AA408582|AU014960|HSU15552	deoxynucleotidyltransferase, terminal, interacting protein 2	protein-coding	Dnttip2	10495773	0.128197	0.00758419	24	13.5	0.143917	220.681	208.514	214.351	258.342	254.117	212.034
13177	chr17-95	chr17	24426751	24427021	+	20.4	0.74	TTS (NM_001080128)	TTS (NM_001080128)	203	NM_010023	Mm.291743	NM_010023	ENSMUSG00000024132	Eci1	Dci|eci	enoyl-Coenzyme A delta isomerase 1	protein-coding	Eci1	10442445	0.128197	0.00758419	24	14	0.0637598	718.961	658.715	765.331	848.711	756.743	745.079
78749	chr16-3	chr16	57391365	57391635	+	154.6	0.603	intron (NM_001040397, intron 1 of 4)	LSU-rRNA_Hsa|rRNA|rRNA	38223	NM_001040397	Mm.328360	NM_001040397	ENSMUSG00000043336	Filip1l	4631422O05Rik|Doc1	filamin A interacting protein 1-like	protein-coding	Filip1l	10436363	0.128197	0.00758419	24	13	0.175695	872.13	712.477	957.866	1085.17	991.762	912.341
56722	chr16-9	chr16	10974984	10975254	+	56.9	0.858	intron (NM_019980, intron 1 of 3)	GSAT_MM|Satellite|Satellite	18002	NM_019980	Mm.294753	NM_019980	ENSMUSG00000022500	Litaf	3222402J11Rik|C85531|N4WBP3|TBX1	LPS-induced TN factor	protein-coding	Litaf	10437687	0.128197	0.00758419	24	7	0.227773	176.746	202.923	219.359	215.652	165.753	149.162
17295	chr6-211	chr6	17463922	17464192	+	16.8	0.694	promoter-TSS (NM_008591)	promoter-TSS (NM_008591)	100	NM_008591	Mm.86844	NM_008591	ENSMUSG00000009376	Met	AI838057|HGF|HGFR|Par4|c-Met	met proto-oncogene	protein-coding	Met	10536505	0.128197	0.00758419	24	15	0.120643	268.184	242.929	249.516	292.798	320.422	293.403
67768	chr16-65	chr16	87354081	87354351	+	19	0.789	promoter-TSS (NM_001159331)	promoter-TSS (NM_001159331)	31	NM_026366	Mm.296532	NM_026366	ENSMUSG00000044442	N6amt1	5830445C04Rik|Hemk2|Pred28	N-6 adenine-specific DNA methyltransferase 1 (putative)	protein-coding	N6amt1	10436698	0.128197	0.00758419	24	14.5	0.12747	173.635	148.075	191.412	196.247	184.64	186.856
244879	chr9-523	chr9	53537038	53537308	+	13.1	0.525	promoter-TSS (NM_007499)	promoter-TSS (NM_007499)	126	NM_001081152	Mm.116713	NM_001081152	ENSMUSG00000033054	Npat	6820401K01|AI427561|BB112559	nuclear protein in the AT region	protein-coding	Npat	10585358	0.128197	0.00758419	24	12	0.0523259	131.3	158.187	148.398	188.61	150.079	142.858
67963	chr12-241	chr12	84772712	84772982	+	15.3	0.65	promoter-TSS (NM_028863)	promoter-TSS (NM_028863)	265	NM_023409	Mm.282556	NM_023409	ENSMUSG00000021242	Npc2	2700012J19Rik|AA408070|AU045843|HE1	Niemann-Pick type C2	protein-coding	Npc2	10401519	0.128197	0.00758419	24	5	0.109602	218.229	245.493	241.059	222.233	211.098	231.327
27273	chr6-241	chr6	5496098	5496368	+	19.7	0.582	promoter-TSS (NM_013743)	promoter-TSS (NM_013743)	45	NM_013743	Mm.235547	NM_013743	ENSMUSG00000019577	Pdk4	AV005916	pyruvate dehydrogenase kinase, isoenzyme 4	protein-coding	Pdk4	10543017	0.128197	0.00758419	24	12	0.447669	1981.39	3879.08	3140.11	4646.73	4207.07	2617.91
382051	chr8-801	chr8	104591585	104591855	+	10.9	0.556	intron (NM_001024606, intron 1 of 1)	CpG	252	NM_001024606	Mm.290750	NM_001024606	ENSMUSG00000048371	Pdp2	4833426J09Rik|Gm1705|mKIAA1348	pyruvate dehyrogenase phosphatase catalytic subunit 2	protein-coding	Pdp2	10574488	0.128197	0.00758419	24	14.5	0.156762	62.0892	57.381	56.6023	67.4156	64.3371	48.0642
98496	chr1-912	chr1	84284212	84284482	+	9.48	0.762	exon (NM_001003948, exon 1 of 3)	exon (NM_001003948, exon 1 of 3)	298	NM_001003948	Mm.187470	NM_001003948	ENSMUSG00000045658	Pid1	5033414K04Rik|NYGGF4	phosphotyrosine interaction domain containing 1	protein-coding	Pid1	10356172	0.128197	0.00758419	24	6.5	0.0641629	127.748	143.746	138.272	125.403	128.488	122.501
56210	chr1-922	chr1	38241990	38242260	+	10.9	0.652	intron (NM_001290814, intron 10 of 21)	intron (NM_001290814, intron 10 of 21)	-112463	NM_019570	Mm.389103	NM_019570	ENSMUSG00000026082	Rev1	1110027I23Rik|AU022044|Rev1l	REV1, DNA directed polymerase	protein-coding	Rev1	10354085	0.128197	0.00758419	24	20	0.209905	321.232	233.923	239.1	258.844	287.526	301.98
70599	chr2-336	chr2	79635624	79635894	+	15.3	0.698	intron (NM_080558, intron 1 of 17)	CpG	334	NM_080558	Mm.272881	NM_080558	ENSMUSG00000027007	Ssfa2	5730488C15Rik|CS-1|CS1|KRAP|SPAG13|mKIAA1927	sperm specific antigen 2	protein-coding	Ssfa2	10473160	0.128197	0.00758419	24	6	0.0924542	240.531	261.495	247.269	248.288	231.807	230.413
52463	chr10-326	chr10	62865492	62865762	+	17.5	0.684	intron (NM_027384, intron 1 of 10)	intron (NM_027384, intron 1 of 10)	14387	NM_001253857	Mm.17774	NM_027384	ENSMUSG00000047146	Tet1	2510010B09Rik|AA517754|BB001228|Cxxc6|D10Ertd17e|LCX|mKIAA1676	tet methylcytosine dioxygenase 1	protein-coding	Tet1	10369688	0.128197	0.00758419	24	14	0.12718	5.76993	5.76834	5.72439	6.08904	6.02455	5.79826
66597	chr14-189	chr14	61599530	61599800	+	16.8	0.686	intron (NM_023233, intron 1 of 2)	CpG	153	NM_023233	Mm.491258	NM_023233	ENSMUSG00000035235	Trim13	3110001L12Rik|CAR|LEU5|RNF77|Rfp2	tripartite motif-containing 13	protein-coding	Trim13	10415784	0.128197	0.00758419	24	12	0.152841	485.04	460.3	613.258	652.082	579.912	499.043
70355	chr11-27	chr11	114844183	114844453	+	39.4	0.779	Intergenic	Intergenic	-7214	NM_001110337	Mm.242413	NM_147217	ENSMUSG00000051043	Gprc5c	1110028I06Rik|3200002M13Rik|Raig3	G protein-coupled receptor, family C, group 5, member C	protein-coding	Gprc5c	10382435	0.14308	0.00848713	24	7	0.15707	9.34444	9.71773	9.70685	9.42121	9.25426	9.18945
27027	chr7-530	chr7	143008111	143008381	+	16	0.684	intron (NM_001128081, intron 2 of 6)	intron (NM_001128081, intron 2 of 6)	2587	NM_020286	Mm.28172	NM_020286	ENSMUSG00000000244	Tspan32	AW208513|Art-1|BB235973|D7Wsu37e|Phemx|Tssc6	tetraspanin 32	protein-coding	Tspan32	10559248	0.14308	0.00848713	24	4	0.0541149	27.632	37.4473	28.3452	25.4852	26.0637	28.0837
110446	chr9-230	chr9	53610134	53610404	+	17.5	0.674	promoter-TSS (NM_144784)	promoter-TSS (NM_144784)	81	NM_144784	Mm.293233	NM_144784	ENSMUSG00000032047	Acat1	6330585C21Rik|Acat	acetyl-Coenzyme A acetyltransferase 1	protein-coding	Acat1	10593591	0.146865	0.00939007	24	13	0.0788424	1439.65	1477.97	1584.16	1821.23	1563.54	1494.04
27360	chr19-711	chr19	53181544	53181814	+	10.2	0.727	intron (NM_013758, intron 1 of 15)	intron (NM_013758, intron 1 of 15)	37682	NM_013758	Mm.426080	NM_013758	ENSMUSG00000025026	Add3	AI463285|R75380	adducin 3 (gamma)	protein-coding	Add3	10463911	0.146865	0.00939007	24	7	0.125557	300.883	338.281	369.239	346.891	293.084	306.247
66253	chr10-259	chr10	13843015	13843285	+	19	0.794	intron (NM_001347362, intron 1 of 5)	intron (NM_001347362, intron 1 of 5)	25807	NM_025446	Mm.45755	NM_025446	ENSMUSG00000019806	Aig1	1500031O19Rik|AV064870|AW413422|CGI-103	androgen-induced 1	protein-coding	Aig1	10367973	0.146865	0.00939007	24	11	0.121637	140.241	144.156	146.593	164.383	141.708	128.922
11641	chr4-951	chr4	57782134	57782404	+	9.48	0.714	intron (NM_001304544, intron 6 of 8)	CpG	-62979	NM_001035532	Mm.467752	NM_009649	ENSMUSG00000038729	Akap2	AA959716|AI649048|Akap-2|Akap-kl|B230340M18Rik|Prka2	A kinase (PRKA) anchor protein 2	protein-coding	Akap2	10505132	0.146865	0.00939007	24	9	0.0781636	6.68792	6.75524	6.76318	6.91217	6.70046	6.51494
11829	chr18-633	chr18	15526194	15526464	+	8.75	0.8	intron (NM_199055, intron 2 of 3)	intron (NM_199055, intron 2 of 3)	-115347	NM_001308643	Mm.250786	NM_009700	ENSMUSG00000024411	Aqp4	WCH4	aquaporin 4	protein-coding	Aqp4	10457614	0.146865	0.00939007	24	7	0.122004	8.43285	8.3734	8.41553	8.50067	8.23412	8.10878
65973	chr4-75	chr4	9668888	9669158	+	22.6	0.618	5' UTR (NM_001177850, exon 1 of 14)	5' UTR (NM_001177850, exon 1 of 14)	139	NM_001177851	Mm.222206	NM_023066	ENSMUSG00000028207	Asph	2310005F16Rik|3110001L23Rik|AI848629|AW261690|AW561901|BAH|C79816|cI-37	aspartate-beta-hydroxylase	protein-coding	Asph	10511446	0.146865	0.00939007	24	7	0.0675216	9.23641	9.40713	9.47199	9.43999	9.31164	9.35856
11964	chr16-414	chr16	44126403	44126673	+	10.9	0.842	intron (NM_007508, intron 1 of 14)	intron (NM_007508, intron 1 of 14)	12481	NM_007508	Mm.217787	NM_007508	ENSMUSG00000052459	Atp6v1a	AI647066|Atp6a1|Atp6a2|Atp6v1a1|VA68|VPP2	ATPase, H+ transporting, lysosomal V1 subunit A	protein-coding	Atp6v1a	10439566	0.146865	0.00939007	24	11.5	0.111482	251.259	296.945	342.4	364.698	301.422	286.43
12167	chr3-485	chr3	141982092	141982362	+	11.7	0.692	promoter-TSS (NM_007560)	promoter-TSS (NM_007560)	37	NM_007560	Mm.39089	NM_007560	ENSMUSG00000052430	Bmpr1b	AI385617|ALK-6|AV355320|Acvrlk6|Alk6|BMPR-1B|BMPR-IB|CFK-43a|SKR6	bone morphogenetic protein receptor, type 1B	protein-coding	Bmpr1b	10502451	0.146865	0.00939007	24	14	0.200132	96.9198	104.864	128.546	133.699	126.415	126.568
170786	chr8-99	chr8	3754332	3754602	+	29.9	0.809	Intergenic	SSU-rRNA_Hsa|rRNA|rRNA	-5483	NM_133238	Mm.32510	NM_133238	ENSMUSG00000031494	Cd209a	CD209|CDSIGN|CIRE|DC-SIGN|DC-SIGN1|Dcsign|SIGN-R1|SIGNR5	CD209a antigen	protein-coding	Cd209a	10576784	0.146865	0.00939007	24	5	0.196788	65.2285	99.6971	73.9593	69.5742	75.5882	66.2556
12562	chr8-1350	chr8	104046468	104046738	+	9.48	0.56	Intergenic	Intergenic	-55022	NM_009868	Mm.21767	NM_009868	ENSMUSG00000031871	Cdh5	7B4|AA408225|Cd144|VE-Cad|VECD|VEcad|Vec	cadherin 5	protein-coding	Cdh5	10574438	0.146865	0.00939007	24	8	0.263327	946.685	1157.02	1305.06	1316.96	918.426	898.908
76779	chr16-202	chr16	3908893	3909163	+	15.3	0.5	promoter-TSS (NM_029738)	promoter-TSS (NM_029738)	19	NM_029738	Mm.458921	NM_029738	ENSMUSG00000014232	Cluap1	2310030D15Rik|2610111M03Rik	clusterin associated protein 1	protein-coding	Cluap1	10433228	0.146865	0.00939007	24	12	0.0118794	142.703	135.509	148.013	173.15	145.505	150.858
102294	chr8-1187	chr8	45333231	45333501	+	10.2	0.571	promoter-TSS (NM_133969)	promoter-TSS (NM_133969)	-170	NM_133969	Mm.245297	NM_133969	ENSMUSG00000079057	Cyp4v3	AU043077|AW111961|Cyp4v2	cytochrome P450, family 4, subfamily v, polypeptide 3	protein-coding	Cyp4v3///Klkb1	10578448	0.146865	0.00939007	24	3	0.0350866	5.26279	5.61945	5.22228	5.34742	5.28654	5.21325
380921	chr14-306	chr14	78732838	78733108	+	12.4	0.69	Intergenic	CpG	-7884	NM_001081336	Mm.89591	NM_001081336	ENSMUSG00000034731	Dgkh	5930402B05Rik|D130015C16|DGK	diacylglycerol kinase, eta	protein-coding	Dgkh	10421774	0.146865	0.00939007	24	13.5	0.109927	109.595	118.541	122.934	139.138	113.522	113.674
230935	chr4-118	chr4	151933650	151933920	+	19.7	0.652	promoter-TSS (NM_172704)	promoter-TSS (NM_172704)	65	NM_172704	Mm.21353	NM_172704	ENSMUSG00000039768	Dnajc11	E030019A03Rik	DnaJ heat shock protein family (Hsp40) member C11	protein-coding	Dnajc11	10510604	0.146865	0.00939007	24	14	0.0715804	173.796	157.536	166.829	180.346	173.425	171.88
66632	chr2-589	chr2	114654850	114655120	+	13.1	0.622	promoter-TSS (NM_025675)	promoter-TSS (NM_025675)	-57	NM_025675	Mm.117809	NM_025675	ENSMUSG00000057147	Dph6	5730421E18Rik|Atpbd4	diphthamine biosynthesis 6	protein-coding	Atpbd4	10486029	0.146865	0.00939007	24	12	0.0844993	7.67591	7.79674	8.09407	8.10265	7.99347	8.01836
13560	chr17-425	chr17	24454631	24454901	+	16	0.647	intron (NR_125990, intron 1 of 13)	CpG	626	NM_001301784	Mm.163132	NM_007893	ENSMUSG00000024137	E4f1	p120E4F|phi-AP3	E4F transcription factor 1	protein-coding	E4f1	10448563	0.146865	0.00939007	24	14	0.082682	7.08832	7.05473	7.11361	7.11518	7.17166	7.13077
13855	chr11-488	chr11	61579281	61579551	+	14.6	0.622	intron (NM_001252188, intron 1 of 10)	CpG	271	NM_001252189	Mm.139695	NM_010148	ENSMUSG00000001036	Epn2	9530051D10Rik|AA536924|Ibp2	epsin 2	protein-coding	Epn2	10386743	0.146865	0.00939007	24	12	0.000304056	8.13765	8.24339	8.20748	8.24413	8.2009	8.20724
14200	chr1-29	chr1	43259951	43260221	+	37.9	0.889	Intergenic	Intergenic	-63325	NM_001289533	Mm.6799	NM_010212	ENSMUSG00000008136	Fhl2	FHL-2|SLIM-3|SLIM3	four and a half LIM domains 2	protein-coding	Fhl2	10354247	0.146865	0.00939007	24	17.5	0.172039	6.08634	6.29132	6.4587	6.61108	6.50576	6.67031
27055	chr6-572	chr6	56832255	56832525	+	10.9	0.528	exon (NM_012056, exon 1 of 10)	exon (NM_012056, exon 1 of 10)	331	NM_012056	Mm.20943	NM_012056	ENSMUSG00000029781	Fkbp9	1810014L23|AW549641|FKBP-63|FKBP-9|FKBP60|FKBP63|FKBP65RS	FK506 binding protein 9	protein-coding	Fkbp9	10538547	0.146865	0.00939007	24	10	0.0841316	395.828	435.443	450.393	454.46	432.852	391.286
74782	chr10-1005	chr10	82690526	82690796	+	9.48	0.762	promoter-TSS (NM_029102)	promoter-TSS (NM_029102)	-11	NM_029102	Mm.191281	NM_029102	ENSMUSG00000020251	Glt8d2	1110021D20Rik	glycosyltransferase 8 domain containing 2	protein-coding	Glt8d2	10371296	0.146865	0.00939007	24	0	0.0540442	74.5936	60.129	57.2705	59.7307	57.6956	59.4481
15002	chr17-812	chr17	34235073	34235343	+	9.48	0.889	Intergenic	MTD|LTR|ERVL-MaLR	-3697	NM_010389	Mm.327358	NM_010389	ENSMUSG00000041538	H2-Ob	A-beta-2|A-beta2|H-2Ab|H-2I|H-2Ob|H2-Ab|H2-Ab2|H2-IAb2|Ob	histocompatibility 2, O region beta locus	protein-coding	H2-Ob	10444284	0.146865	0.00939007	24	1.5	0.20161	48.5759	152.075	47.6449	47.4422	51.7623	56.7571
218454	chr13-44	chr13	93941096	93941366	+	23.3	0.929	3' UTR (NM_009712, exon 8 of 8)	3' UTR (NM_009712, exon 8 of 8)	-116565	NM_172589	Mm.316553	NM_172589	ENSMUSG00000045312	Lhfpl2	6030465B15|AI447312|AW050335|mKIAA0206|vgim	lipoma HMGIC fusion partner-like 2	protein-coding	Lhfpl2	10406676	0.146865	0.00939007	24	7	0.0902693	75.9075	74.8173	93.6236	76.4	69.93	68.3434
240354	chr18-90	chr18	65431080	65431350	+	19	0.643	exon (NM_172833, exon 1 of 16)	exon (NM_172833, exon 1 of 16)	218	NM_172833	Mm.132613	NM_172833	ENSMUSG00000032688	Malt1	A630046N12|D430033E09Rik|Pcasp1	MALT1 paracaspase	protein-coding	Malt1	10456296	0.146865	0.00939007	24	5.5	0.206044	78.4619	109.132	101.971	93.422	81.8505	83.3459
100978	chr5-762	chr5	72559313	72559583	+	13.1	0.605	intron (NM_133921, intron 1 of 22)	CpG	197	NM_133921	Mm.187453	NM_133921	ENSMUSG00000072889	Nfxl1	1700012H24Rik|AW538212|D430033A06Rik|DNABF|GCF|Gm1058|TCF9	nuclear transcription factor, X-box binding-like 1	protein-coding	Nfxl1	10530467	0.146865	0.00939007	24	3.5	0.0541644	54.2293	62.1753	56.303	52.8972	48.1359	53.0525
101187	chr6-634	chr6	127453764	127454034	+	10.9	0.655	intron (NM_001346512, intron 1 of 5)	CpG	176	NM_181402	Mm.110818	NM_181402	ENSMUSG00000037997	Parp11	5330431N24Rik|AI851877|ARTD11|HIN1L|PARP-11	poly (ADP-ribose) polymerase family, member 11	protein-coding	Parp11	10542040	0.146865	0.00939007	24	5	0.0741331	68.6106	85.8889	72.0487	72.7674	69.9014	68.4429
55983	chr6-895	chr6	101473468	101473738	+	9.48	0.875	Intergenic	Intergenic	-95706	NM_018884	Mm.321654	NM_018884	ENSMUSG00000035357	Pdzrn3	1110020C07Rik|AI429718|AL023082|LNX3|SEMACAP3|Semcap3	PDZ domain containing RING finger 3	protein-coding	Pdzrn3	10546725	0.146865	0.00939007	24	12	0.0762685	871.895	959.886	970.302	1092.03	995.978	924.231
110208	chr4-363	chr4	149166312	149166582	+	16.8	0.625	intron (NM_001081274, intron 1 of 12)	CpG	260	NM_001081274	Mm.252080	NM_025801	ENSMUSG00000028961	Pgd	0610042A05Rik|AU019875|C78335	phosphogluconate dehydrogenase	protein-coding	Pgd	10518570	0.146865	0.00939007	24	4	0.0701874	7.3466	7.60828	7.39152	7.25806	7.15751	7.35097
69675	chr12-236	chr12	29937950	29938220	+	13.9	0.743	promoter-TSS (NM_181395)	promoter-TSS (NM_181395)	49	NM_181395	Mm.251774	NM_181395	ENSMUSG00000020674	Pxdn	2310075M15Rik|C85409|E330004E07|VPO1|mKIAA0230	peroxidasin	protein-coding	Pxdn	10395103	0.146865	0.00939007	24	7	0.206991	213.158	327.448	306.47	283.875	207.536	186.702
381626	chr5-437	chr5	28316628	28316898	+	13.9	0.706	promoter-TSS (NM_028234)	promoter-TSS (NM_028234)	-426	NM_028234	Mm.304075	NM_028234	ENSMUSG00000048271	Rbm33	3200001K10Rik|6430512A10Rik|AA386890|Prr8	RNA binding motif protein 33	protein-coding	Rbm33	10520371	0.146865	0.00939007	24	12.5	0.0284752	532.427	521.148	541.144	549.258	522.628	545.46
17131	chr18-194	chr18	75342748	75343018	+	14.6	0.595	Intergenic	CpG	-24482	NM_001042660	Mm.34407	NM_008543	ENSMUSG00000025880	Smad7	Madh7	SMAD family member 7	protein-coding	Smad7	10456745	0.146865	0.00939007	24	1.5	0.169098	7.1404	6.99924	6.97393	6.7483	6.80057	6.98558
66661	chr5-565	chr5	76974794	76975064	+	12.4	0.564	intron (NM_025691, intron 1 of 18)	CpG	228	NM_025691	Mm.296976	NM_025691	ENSMUSG00000036323	Srp72	5730576P14Rik|72kDa|AI132477|BC019196|C77589	signal recognition particle 72	protein-coding	Srp72	10522676	0.146865	0.00939007	24	17	0.0843366	628.688	604.517	627.447	699.413	666.703	693.225
66513	chr15-239	chr15	80133137	80133407	+	16	0.59	intron (NM_025609, intron 1 of 10)	CpG	118	NM_025609	Mm.288245	NM_025609	ENSMUSG00000022414	Tab1	2310012M03Rik|Map3k7ip1|b2b449Clo	TGF-beta activated kinase 1/MAP3K7 binding protein 1	protein-coding	Tab1	10425341	0.146865	0.00939007	24	14	0.127187	157.134	145.882	161.717	168.319	167.023	148.589
269831	chr6-509	chr6	21852054	21852324	+	13.1	0.625	intron (NM_173007, intron 1 of 8)	(A)n|Simple_repeat|Simple_repeat	326	NM_173007	Mm.21950	NM_173007	ENSMUSG00000029669	Tspan12	9030619E17|AI426782|AI663988|AW111457|Tm4sf12	tetraspanin 12	protein-coding	Tspan12	10543306	0.146865	0.00939007	24	8	0.204686	101.352	103.111	120.507	89.7332	85.4305	90.9921
58203	chr2-381	chr2	173243608	173243878	+	18.2	0.595	intron (NM_022995, intron 1 of 3)	intron (NM_022995, intron 1 of 3)	-24821	NM_021394	Mm.116687	NM_021394	ENSMUSG00000027514	Zbp1	2010010H03Rik|Dai|Dlm1|mZaDLM	Z-DNA binding protein 1	protein-coding	Zbp1	10490150	0.146865	0.00939007	24	1.5	0.123977	68.3041	65.7687	63.5368	54.7573	63.2832	59.3012
22661	chr16-720	chr16	33400217	33400487	+	8.75	0.65	intron (NM_011749, intron 1 of 8)	intron (NM_011749, intron 1 of 8)	19577	NM_011749	Mm.392667	NM_011749	ENSMUSG00000022811	Zfp148	2210405J08Rik|AI480666|AW045217|BERF-1|BFCOL1|ZBP-89|Znf148	zinc finger protein 148	protein-coding	Zfp148	10435237	0.146865	0.00939007	24	8.5	0.0438972	483.855	567.552	512.835	561.277	524.94	506.318
73233	chr17-260	chr17	21962334	21962604	+	15.3	0.628	promoter-TSS (NM_001025373)	promoter-TSS (NM_001025373)	-5	NM_001199048	Mm.311219	NM_001199048	ENSMUSG00000071267	Zfp942	3110048L19Rik	zinc finger protein 942	protein-coding	Zfp942	10448195	0.146865	0.00939007	24	9.5	0.0333542	152.568	172.91	174.083	195.392	168.799	150.544
211914	chr12-433	chr12	21111411	21111681	+	11.7	0.733	promoter-TSS (NM_001098168)	promoter-TSS (NM_001098168)	-210	NM_001004364	Mm.358946	NM_001004364	ENSMUSG00000052632	Asap2	6530401G17Rik|Ddef2|Gm1523|Gm592|PAG3|PAP	ArfGAP with SH3 domain, ankyrin repeat and PH domain 2	protein-coding	Asap2	10394862	0.16358	0.010484	24	11	0.118356	124.044	124.896	131.255	132.554	121.479	118.269
52538	chr18-156	chr18	74779242	74779512	+	16	0.625	promoter-TSS (NR_028560)	promoter-TSS (NR_028560)	165	NM_177470	Mm.245724	NM_177470	ENSMUSG00000036880	Acaa2	0610011L04Rik|AI255831|AI265397|D18Ertd240e	acetyl-Coenzyme A acyltransferase 2 (mitochondrial 3-oxoacyl-Coenzyme A thiolase)	protein-coding	Acaa2	10456699	0.167635	0.011578	24	15	0.153371	1671	1608.39	1943.85	2243.76	1911.91	1832.5
99633	chr3-8	chr3	149052696	149052966	+	62.7	0.717	Intergenic	(TTAGGG)n|Simple_repeat|Simple_repeat	-98196	NM_001081298	Mm.9776	NM_001081298	ENSMUSG00000028184	Adgrl2	AI450192|CIRL-2|Gm619|Lec1|Lphh1|Lphn2|mKIAA0786	adhesion G protein-coupled receptor L2	protein-coding	Lphn2	10502748	0.167635	0.011578	24	11	0.194469	7.527	7.69539	7.89426	7.93132	7.56314	7.54195
75547	chr7-65	chr7	75612137	75612407	+	26.2	0.848	intron (NM_029332, intron 7 of 36)	intron (NM_029332, intron 7 of 36)	156738	NM_029332	Mm.216107	NM_029332	ENSMUSG00000066406	Akap13	1700026G02Rik|5730522G15Rik|5830460E08Rik|AKAP-13|AKAP-Lbc|BRX|Ht31|LBC|PROTO-LB|PROTO-LBC	A kinase (PRKA) anchor protein 13	protein-coding	Akap13	10554166	0.167635	0.011578	24	11.5	0.195727	261.261	304.247	303.274	341.093	311.766	249.675
20239	chr5-150	chr5	121711174	121711444	+	22.6	0.756	promoter-TSS (NM_009125)	promoter-TSS (NM_009125)	-300	NM_009125	Mm.260900	NM_009125	ENSMUSG00000042605	Atxn2	9630045M23Rik|ATX2|AW544490|Sca2	ataxin 2	protein-coding	Atxn2	10525313	0.167635	0.011578	24	9.5	0.090743	603.814	626.734	718.762	701.17	626.109	598.642
53374	chr10-146	chr10	60209295	60209565	+	19	0.674	intron (NM_016803, intron 1 of 3)	intron (NM_016803, intron 1 of 3)	9830	NM_016803	Mm.12866	NM_016803	ENSMUSG00000057337	Chst3	C6ST|C6ST-1|GST-0	carbohydrate (chondroitin 6/keratan) sulfotransferase 3	protein-coding	Chst3	10369301	0.167635	0.011578	24	2.5	0.102184	48.1248	49.6999	49.3046	39.8407	43.8374	43.9137
114874	chr14-598	chr14	45690834	45691104	+	9.48	0.737	Intergenic	Intergenic	-32826	NM_001039106	Mm.121918	NM_176845	ENSMUSG00000037697	Ddhd1	Mir5131|PA-PLA1	DDHD domain containing 1	protein-coding	Ddhd1	10419240	0.167635	0.011578	24	5.5	0.149603	7.15788	7.57106	7.41167	7.42519	7.22576	7.27866
105841	chr15-384	chr15	73512758	73513028	+	13.1	0.741	intron (NM_001081066, intron 1 of 22)	intron (NM_001081066, intron 1 of 22)	333	NM_001081066	Mm.322557	NM_001081066	ENSMUSG00000036661	Dennd3	AI447457|E030003N15Rik	DENN/MADD domain containing 3	protein-coding	Dennd3	10424584	0.167635	0.011578	24	6	0.0815011	98.7754	102.182	103.267	99.4073	82.0005	94.4874
208440	chr13-270	chr13	9350793	9351063	+	14.6	0.7	intron (NM_001081426, intron 1 of 36)	intron (NM_001081426, intron 1 of 36)	74403	NM_001081426	Mm.217326	NM_172459	ENSMUSG00000048264	Dip2c	2900024P20Rik|9630044M06|mKIAA0934	disco interacting protein 2 homolog C	protein-coding	Dip2c	10403466	0.167635	0.011578	24	12	0.098698	7.24466	7.42859	7.6905	7.71852	7.47392	7.42124
108655	chr6-725	chr6	99027677	99027947	+	10.9	0.586	intron (NM_001347345, intron 6 of 19)	intron (NM_001347345, intron 6 of 19)	486	NM_001197322	Mm.234965	NM_053202	ENSMUSG00000030067	Foxp1	3110052D19Rik|4932443N09Rik|AI461938|AW494214	forkhead box P1	protein-coding	Foxp1	10546661	0.167635	0.011578	24	5	0.0646578	7.12703	7.68427	7.19781	7.28724	7.16027	7.15282
241391	chr2-6	chr2	57629441	57629711	+	99.9	0.673	Intergenic	(TTAGGG)n|Simple_repeat|Simple_repeat	-368579	NM_172855	Mm.484118	NM_172855	ENSMUSG00000026828	Galnt5	4832424J23	UDP-N-acetyl-alpha-D-galactosamine:polypeptide N-acetylgalactosaminyltransferase 5	protein-coding	Galnt5	10472181	0.167635	0.011578	24	19	0.026071	30.0464	30.2648	28.3029	27.4985	30.3823	29.7959
14677	chr5-1520	chr5	18359857	18360127	+	8.75	0.714	intron (NM_010305, intron 1 of 7)	CpG	421	NM_010305	Mm.254629	NM_010305	ENSMUSG00000057614	Gnai1	AU046200|Gialpha1|Gnai-1	guanine nucleotide binding protein (G protein), alpha inhibiting 1	protein-coding	Gnai1	10528227	0.167635	0.011578	24	6	0.182002	84.3953	165.795	112.626	121.982	100.119	85.4051
227753	chr2-904	chr2	35256619	35256889	+	16	0.722	intron (NM_001206368, intron 1 of 16)	CpG	395	NM_001206367	Mm.443	NM_146120	ENSMUSG00000026879	Gsn	ADF	gelsolin	protein-coding	Gsn	10471655	0.167635	0.011578	24	6	0.095813	10.9633	11.2109	10.8686	10.8645	10.9555	10.837
30949	chr7-759	chr7	123378017	123378287	+	11.7	0.611	exon (NM_025304, exon 1 of 11)	exon (NM_025304, exon 1 of 11)	170	NM_025304	Mm.260527	NM_025304	ENSMUSG00000030763	Lcmt1	AL033290|LCMT-1|Lcmt	leucine carboxyl methyltransferase 1	protein-coding	Lcmt1	10557285	0.167635	0.011578	24	12	0.0394	229.61	229.978	240.301	241.199	248.494	233.933
72568	chr1-343	chr1	180641172	180641442	+	16	0.65	non-coding (NR_120498, exon 1 of 15)	non-coding (NR_120498, exon 1 of 15)	157	NR_120498	Mm.275044	NM_175186	ENSMUSG00000058729	Lin9	2700022J23Rik|Bara|Lin-9|TGS|TGS1|mLin-9	lin-9 homolog (C. elegans)	protein-coding	Lin9	10352267	0.167635	0.011578	24	20	0.118398	5.05802	4.8091	4.91694	4.98807	4.92168	5.10565
17436	chr9-356	chr9	86658515	86658785	+	14.6	0.733	intron (NM_008615, intron 3 of 13)	MER47B|DNA|TcMar-Tigger	28627	NM_001198933	Mm.148155	NM_008615	ENSMUSG00000032418	Me1	D9Ertd267e|Mdh-1|Mod-1|Mod1	malic enzyme 1, NADP(+)-dependent, cytosolic	protein-coding	Me1	10595480	0.167635	0.011578	24	5	0.0444063	11.0735	11.1133	10.8259	10.9639	11.0049	10.8936
67938	chr17-60	chr17	70963617	70963887	+	24.1	0.661	Intergenic	LSU-rRNA_Hsa|rRNA|rRNA	26764	NM_023402	Mm.261329	NM_023402	ENSMUSG00000034868	Myl12b	1500001M02Rik|C77744|Mylc2b|RLC-B	myosin, light chain 12B, regulatory	protein-coding	Myl12b	10452639	0.167635	0.011578	24	4.5	0.0662206	443.531	505.995	424.856	442.284	386.48	411.489
68375	chr2-267	chr2	36049054	36049324	+	16.8	0.558	promoter-TSS (NM_029309)	promoter-TSS (NM_029309)	103	NM_026703	Mm.19834	NM_026703	ENSMUSG00000026895	Ndufa8	0610033L03Rik|AW261656	NADH dehydrogenase (ubiquinone) 1 alpha subcomplex, 8	protein-coding	Ndufa8	10482089	0.167635	0.011578	24	9	0.0819537	1892.92	1884.02	2098	2015.47	1810.41	1749.47
14536	chr2-1700	chr2	38906217	38906487	+	8.02	0.667	intron (NM_010264, intron 1 of 10)	RMER19B|LTR|ERVK	20109	NM_010264	Mm.439703	NM_010264	ENSMUSG00000063972	Nr6a1	1700113M01Rik|Gcnf|NCNF|RTR	nuclear receptor subfamily 6, group A, member 1	protein-coding	Nr6a1	10482249	0.167635	0.011578	24	14	0.0428153	188.925	194.58	208.512	205.904	208.598	206.55
18451	chr10-70	chr10	59323256	59323526	+	26.2	0.69	promoter-TSS (NM_011030)	promoter-TSS (NM_011030)	95	NM_001316371	Mm.2212	NM_011030	ENSMUSG00000019916	P4ha1	AL022634|P4ha	procollagen-proline, 2-oxoglutarate 4-dioxygenase (proline 4-hydroxylase), alpha 1 polypeptide	protein-coding	P4ha1	10363350	0.167635	0.011578	24	7	0.0303349	8.74901	8.70305	8.64008	8.82455	8.54009	8.5593
67784	chr6-481	chr6	116072955	116073225	+	13.1	0.8	intron (NM_177412, intron 3 of 5)	intron (NM_177412, intron 3 of 5)	-78085	NM_026376	Mm.3085	NM_026376	ENSMUSG00000030123	Plxnd1	6230425C21Rik|b2b1863Clo|b2b553Clo	plexin D1	protein-coding	Plxnd1	10547100	0.167635	0.011578	24	8.5	0.207752	342.31	387.499	437.937	413.972	297.344	321.7
666794	chr13-27	chr13	46418173	46418443	+	29.2	0.662	promoter-TSS (NM_001081425)	promoter-TSS (NM_001081425)	8	NM_001081425	Mm.38269	NM_001081425	ENSMUSG00000038132	Rbm24	6330546B05Rik|AI606861	RNA binding motif protein 24	protein-coding	Rbm24	10404904	0.167635	0.011578	24	16	0.0549422	1623.4	1533.59	1686.48	1659.23	1713.23	1853.32
52250	chr6-101	chr6	71757339	71757609	+	25.5	0.709	intron (NM_178608, intron 2 of 6)	MamRep605|LTR?|LTR?	49793	NM_178608	Mm.146332	NM_178608	ENSMUSG00000052852	Reep1	D6Ertd253e	receptor accessory protein 1	protein-coding	Reep1	10539017	0.167635	0.011578	24	8	0.0292671	552.791	532.948	568.052	531.734	526.369	523.153
66940	chr9-187	chr9	109027330	109027600	+	18.2	0.667	intron (NM_173019, intron 10 of 13)	intron (NM_173019, intron 10 of 13)	-11102	NM_001284332	Mm.196533	NM_025858	ENSMUSG00000025647	Shisa5	2310008D10Rik|6430628I05Rik|Scotin|mShisa5	shisa family member 5	protein-coding	Shisa5	10589350	0.167635	0.011578	24	5	0.171155	7.82419	8.61947	7.99235	8.04331	7.87178	7.7503
73102	chr13-439	chr13	34345200	34345470	+	11.7	0.545	promoter-TSS (NM_001033167)	promoter-TSS (NM_001033167)	-153	NM_001033167	Mm.23932	NM_001033167	ENSMUSG00000038267	Slc22a23	3110004L20Rik	solute carrier family 22, member 23	protein-coding	Slc22a23	10408616	0.167635	0.011578	24	9	0.131564	223.827	234.782	246.31	274.452	217.75	203.082
226999	chr1-527	chr1	40694277	40694547	+	13.1	0.704	intron (NM_001033289, intron 1 of 11)	intron (NM_001033289, intron 1 of 11)	12700	NM_001033289	Mm.256414	NM_001033289	ENSMUSG00000026062	Slc9a2	2210416H12Rik|4932415O19Rik|AV333884|NHE2	solute carrier family 9 (sodium/hydrogen exchanger), member 2	protein-coding	Slc9a2	10345855	0.167635	0.011578	24	9.5	0.134195	386.853	402.164	510.42	505.792	384.727	405.509
20660	chr9-236	chr9	41984425	41984695	+	16.8	0.771	intron (NM_011436, intron 39 of 47)	intron (NM_011436, intron 39 of 47)	139729	NM_011436	Mm.121920	NM_011436	ENSMUSG00000049313	Sorl1	2900010L19Rik|AI596264|AW261561|LR11|SorLA|gp250|mSorLA	sortilin-related receptor, LDLR class A repeats-containing	protein-coding	Sorl1	10592535	0.167635	0.011578	24	6.5	0.0671645	448.701	474.798	527.092	503.068	438.411	442.839
20851	chr11-386	chr11	100850349	100850619	+	17.5	0.591	5' UTR (NM_001113563, exon 1 of 19)	5' UTR (NM_001113563, exon 1 of 19)	101	NM_001113563	Mm.34064	NM_011489	ENSMUSG00000020919	Stat5b	-	signal transducer and activator of transcription 5B	protein-coding	Stat5b	10391286	0.167635	0.011578	24	11	0.052538	10.4124	10.4355	10.4557	10.4867	10.4554	10.3692
58231	chr2-225	chr2	164082194	164082464	+	17.5	0.765	intron (NM_021420, intron 2 of 10)	intron (NM_021420, intron 2 of 10)	8151	NM_021420	Mm.234472	NM_021420	ENSMUSG00000018209	Stk4	AI447339|AU020804|Kas-2|Mst1|Ysk3	serine/threonine kinase 4	protein-coding	Stk4	10478447	0.167635	0.011578	24	6	0.0136472	191.708	258.351	208.417	226.978	208.754	205.648
21809	chr12-196	chr12	85970218	85970488	+	16	0.719	intron (NM_001347395, intron 29 of 32)	intron (NM_001347395, intron 29 of 32)	108688	NM_009368	Mm.3992	NM_009368	ENSMUSG00000021253	Tgfb3	TGF-beta-3|Tgfb-3	transforming growth factor, beta 3	protein-coding	Tgfb3	10401673	0.167635	0.011578	24	12	0.0674226	459.181	502.883	547.733	609.178	461.955	476.499
240832	chr1-49	chr1	156046801	156047071	+	24.8	0.822	intron (NM_172843, intron 2 of 6)	intron (NM_172843, intron 2 of 6)	6075	NM_001160181	Mm.253335	NM_022329	ENSMUSG00000050565	Tor1aip2	1110020D10Rik|15kDa|A130072J07|AA103493|AW060462|AW610675|C77739|Ifrg15|Lull1	torsin A interacting protein 2	protein-coding	Tor1aip2	10350800	0.167635	0.011578	24	15	0.0991717	7.22604	6.97948	7.04923	7.26	7.18308	7.19838
208820	chr4-1583	chr4	12840901	12841171	+	8.75	0.765	Intergenic	L1Md_T|LINE|L1	-65801	NM_173746	Mm.12057	NM_173746	ENSMUSG00000055963	Triqk	C130086A10|Gm11818|OTTMUSG00000004461	triple QxxK/R motif containing	protein-coding	Gm11818	10503376	0.167635	0.011578	24	11.5	0.0664893	4.60785	4.61204	4.5903	4.6479	4.66282	4.53977
21417	chr18-160	chr18	5591428	5591698	+	16	0.556	promoter-TSS (NM_011546)	promoter-TSS (NM_011546)	-297	NM_011546	Mm.3929	NM_011546	ENSMUSG00000024238	Zeb1	3110032K11Rik|AREB6|BZP|MEB1|Nil2|TCF-8|Tcf18|Tcf8|Tw|ZEB|Zfhep|Zfhx1a|Zfx1a|Zfx1ha|[delta]EF1	zinc finger E-box binding homeobox 1	protein-coding	Zeb1	10453678	0.167635	0.011578	24	11	0.0460539	635.025	654.904	676.952	711.757	668.401	630.573
216345	chr10-175	chr10	115384724	115384994	+	21.1	0.569	promoter-TSS (NM_025780)	promoter-TSS (NM_025780)	-100	NM_001033261	Mm.207621	NM_001033261	ENSMUSG00000034163	Zfc3h1	BC033596|Ccdc131|Psrc2	zinc finger, C3H1-type containing	protein-coding	Zfc3h1	10366409	0.167635	0.011578	24	6	0.0674721	243.116	304.885	267.088	279.242	234.291	257.407
240068	chr17-242	chr17	33089401	33089671	+	16.8	0.686	intron (NM_001024950, intron 1 of 3)	intron (NM_001024950, intron 1 of 3)	169	NM_001024950	Mm.121392	NM_001024950	ENSMUSG00000067424	Zfp563	D10628|D130054H01|NTfin7|Zfp413	zinc finger protein 563	protein-coding	Zfp563	10443926	0.167635	0.011578	24	11	0.021991	87.323	94.7149	95.2403	113.908	93.0613	82.2595
238692	chr13-643	chr13	67451392	67451662	+	9.48	0.583	promoter-TSS (NM_177712)	promoter-TSS (NM_177712)	97	NM_177712	Mm.486478	NM_177712	ENSMUSG00000069206	Zfp874a	C330011K17Rik|Rslcan15|Zfp874	zinc finger protein 874a	protein-coding	Zfp874a	10410321	0.167635	0.011578	24	10	0.0761483	116.287	130.842	137.506	134.476	124.803	123.979
237411	chr10-330	chr10	82241055	82241325	+	15.3	0.667	promoter-TSS (NM_001105557)	promoter-TSS (NM_001105557)	85	NM_001105557		NM_172789	ENSMUSG00000062931	Zfp938	B230315N10Rik	zinc finger protein 938	protein-coding	Zfp938	10371277	0.167635	0.011578	24	14	0.126558	9.51485	9.56072	9.77652	9.67527	9.67268	9.67953
22759	chr17-611	chr17	17179200	17179470	+	11.7	0.571	Intergenic	Intergenic	57952	NM_011765	Mm.436633	NM_011765	ENSMUSG00000095990	Zfp97	NGD16-4	zinc finger protein 97	protein-coding	Zfp97///Zfp960///BC002059	10442037	0.167635	0.011578	24	13	0.117952	8.25866	8.30916	8.35291	8.59945	8.47597	8.38873
26897	chr12-738	chr12	84009517	84009787	+	10.2	0.654	exon (NM_012006, exon 1 of 3)	exon (NM_012006, exon 1 of 3)	150	NM_012006	Mm.1978	NM_012006	ENSMUSG00000072949	Acot1	ACH2|CTE-1|CTE-I|Cte1|D12Ucla1	acyl-CoA thioesterase 1	protein-coding	Acot1	10397148	0.186349	0.0128981	24	15	0.0849801	26.0281	24.9708	28.9596	31.2125	28.7763	26.4437
26878	chr1-437	chr1	142652527	142652797	+	27.7	0.886	Intergenic	(TC)n|Simple_repeat|Simple_repeat	-988035	NM_020025	Mm.285580	NM_020025	ENSMUSG00000033849	B3galt2	-	UDP-Gal:betaGlcNAc beta 1,3-galactosyltransferase, polypeptide 2	protein-coding	B3galt2	10350473	0.186349	0.0128981	24	6	0.301157	97.9416	208.118	125.633	141.44	125.321	113.538
52662	chr18-149	chr18	67933465	67933735	+	15.3	0.69	intron (NM_172631, intron 1 of 5)	CpG	343	NM_172631	Mm.440183	NM_172631	ENSMUSG00000024544	Ldlrad4	8230401C20Rik|A430083H02|A430108L08Rik|C18orf1|D18Ertd653e|D330030L18Rik	low density lipoprotein receptor class A domain containing 4	protein-coding	D18Ertd653e	10456492	0.186349	0.0128981	24	9	0.160344	7.52606	7.86172	7.78048	7.81638	7.54903	7.49751
74355	chr17-467	chr17	71474799	71475069	+	13.1	0.676	intron (NM_028887, intron 1 of 47)	CpG	409	NM_028887	Mm.194450	NM_028887	ENSMUSG00000024054	Smchd1	4931400A14Rik|AW554188|MommeD1|mKIAA0650	SMC hinge domain containing 1	protein-coding	Smchd1	10452658	0.186349	0.0128981	24	5.5	0.101385	209.438	268.787	235.526	256.233	221.596	211.634
56399	chr17-58	chr17	32321026	32321296	+	22.6	0.532	promoter-TSS (NM_019774)	promoter-TSS (NM_019774)	77	NR_131218	Mm.328945	NM_019774	ENSMUSG00000024045	Akap8	1200016A02Rik|AA673585|AKAP-8|AKAP95|AU015639	A kinase (PRKA) anchor protein 8	protein-coding	Akap8	10449839	0.190788	0.0142182	24	11	0.0845629	8.85465	8.80739	9.06195	9.07946	8.90173	8.91466
78541	chr15-106	chr15	98145721	98145991	+	19.7	0.705	promoter-TSS (NM_030121)	promoter-TSS (NM_030121)	-154	NM_001170710	Mm.200766	NM_030121	ENSMUSG00000048175	Asb8	4930539L19Rik|AI788835|C430011H06Rik	ankyrin repeat and SOCS box-containing 8	protein-coding	Asb8	10432122	0.190788	0.0142182	24	16	0.162627	9.91377	9.86821	10.0682	10.1232	10.0452	10.1294
51897	chr2-382	chr2	91710310	91710580	+	16	0.667	promoter-TSS (NM_178724)	promoter-TSS (NM_178724)	147	NM_145528	Mm.28492	NM_145528	ENSMUSG00000027244	Atg13	1110053A20Rik|D2Ertd391e|Harbi1	autophagy related 13	protein-coding	Atg13	10485048	0.190788	0.0142182	24	14	0.114134	805.047	760.978	844.352	914.659	869.041	846.708
12369	chr19-280	chr19	56406627	56406897	+	16	0.676	intron (NM_007611, intron 2 of 6)	intron (NM_007611, intron 2 of 6)	9633	NM_007611	Mm.35687	NM_007611	ENSMUSG00000025076	Casp7	AI314680|CMH-1|ICE-IAP3|Mch3|caspase-7|mCASP-7	caspase 7	protein-coding	Casp7	10464128	0.190788	0.0142182	24	11	0.170384	83.1071	81.8347	106.876	94.4311	89.9175	89.3856
12398	chr8-1	chr8	122651461	122651731	+	126.1	0.701	intron (NM_009824, intron 1 of 11)	intron (NM_009824, intron 1 of 11)	26579	NM_001109873	Mm.194339	NM_009824	ENSMUSG00000006362	Cbfa2t3	A630044F12Rik|AI465270|AW229127|Cbfa2t3h|ETO-2|Eto2|MTGR2	core-binding factor, runt domain, alpha subunit 2, translocated to, 3 (human)	protein-coding	Cbfa2t3	10582429	0.190788	0.0142182	24	3.5	0.0907006	8.32215	7.8825	8.16344	7.98947	7.64706	7.94995
12723	chr6-517	chr6	42286394	42286664	+	13.1	0.731	promoter-TSS (NM_013491)	promoter-TSS (NM_013491)	-156	NM_013491	Mm.386757	NM_013491	ENSMUSG00000029862	Clcn1	Clc-1|Clc1|SMCC1|adr|mto|myotonia|nmf355	chloride channel, voltage-sensitive 1	protein-coding	Clcn1	10537742	0.190788	0.0142182	24	14	0.0689924	929.512	819.523	948.287	943.514	969.865	981.619
14066	chr3-608	chr3	121736489	121736759	+	10.2	0.762	Intergenic	Intergenic	13087	NM_010171	Mm.273188	NM_010171	ENSMUSG00000028128	F3	AA409063|CD142|Cf-3|Cf3|TF	coagulation factor III	protein-coding	F3	10495675	0.190788	0.0142182	24	8.5	0.197127	99.8901	114.968	119.948	123.674	92.2707	91.6612
71721	chr10-494	chr10	70440597	70440867	+	14.6	0.684	promoter-TSS (NM_001143777)	promoter-TSS (NM_001143777)	64	NM_001143777	Mm.477813	NM_024244	ENSMUSG00000043259	Fam13c	1200015N20Rik|C030038O19Rik|mKIAA1796	family with sequence similarity 13, member C	protein-coding	Fam13c	10363868	0.190788	0.0142182	24	5	0.0701026	7.46891	7.40096	7.53094	7.36125	7.29189	7.45493
14229	chr17-270	chr17	28486033	28486303	+	16	0.587	promoter-TSS (NM_010220)	promoter-TSS (NM_010220)	-19	NM_010220	Mm.276405	NM_010220	ENSMUSG00000024222	Fkbp5	D17Ertd592e|Dit1|FKBP-5|FKBP51	FK506 binding protein 5	protein-coding	Fkbp5	10449452	0.190788	0.0142182	24	22	0.258327	357.946	341.521	250.079	294.322	318.273	401.037
14409	chr4-14	chr4	33058325	33058595	+	38.6	0.742	Intergenic	Intergenic	-4652	NM_008076	Mm.6227	NM_008076	ENSMUSG00000023267	Gabrr2	-	gamma-aminobutyric acid (GABA) C receptor, subunit rho 2	protein-coding	Gabrr2	10503856	0.190788	0.0142182	24	19	0.167853	70.8674	63.4206	54.2003	67.2145	75.6255	72.1601
16558	chr2-603	chr2	142901420	142901690	+	14.6	0.622	promoter-TSS (NM_001081133)	promoter-TSS (NM_001081133)	-91	NM_001081133	Mm.251934	NM_001081133	ENSMUSG00000038844	Kif16b	8430434E15Rik|AA623607|AI789011|C80253|C80902|mKIAA1590	kinesin family member 16B	protein-coding	Kif16b	10488156	0.190788	0.0142182	24	11	0.0896046	589.239	603.709	643.337	712.69	624.185	531.719
67207	chr8-61	chr8	25785348	25785618	+	25.5	0.611	promoter-TSS (NM_026032)	promoter-TSS (NM_026032)	-108	NM_026032	Mm.30198	NM_026032	ENSMUSG00000037296	Lsm1	2810025O06Rik|CASM	LSM1 homolog, mRNA degradation associated	protein-coding	Lsm1	10571048	0.190788	0.0142182	24	9	0.0905662	94.5274	102.874	107.901	110.039	90.7182	85.5953
26407	chr17-138	chr17	12268601	12268871	+	21.1	0.714	intron (NM_011948, intron 3 of 26)	intron (NM_011948, intron 3 of 26)	49924	NM_011948	Mm.28587	NM_011948	ENSMUSG00000014426	Map3k4	D17Rp17|D17Rp17e|MAPKKK4|MEKK 4|MTK1|Mek4b|Mekk4|RP17|Rp17a|Tas|mKIAA0213	mitogen-activated protein kinase kinase kinase 4	protein-coding	Map3k4	10447742	0.190788	0.0142182	24	9	0.0568302	338.546	315.91	361.126	364.216	338.758	334.627
71449	chr1-607	chr1	162548430	162548700	+	13.9	0.636	promoter-TSS (NM_144877)	promoter-TSS (NM_144877)	-220	NM_144877	Mm.270569	NM_144877	ENSMUSG00000026694	Mettl13	5630401D24Rik	methyltransferase like 13	protein-coding	Mettl13	10359506	0.190788	0.0142182	24	16	0.130801	92.3826	88.8586	87.2026	99.3116	100.038	104.336
18028	chr4-955	chr4	82360277	82360547	+	10.2	0.727	intron (NM_001113210, intron 3 of 11)	Lx2|LINE|L1	145367	NM_001286131	Mm.317947	NM_008687	ENSMUSG00000008575	Nfib	6720429L07Rik|CTF|E030026I10Rik|NF-I/B|NF1-B|NFI-B	nuclear factor I/B	protein-coding	Nfib	10514054	0.190788	0.0142182	24	11	0.0173241	10.8412	10.9102	10.9016	10.9351	10.8039	10.8883
170826	chr18-5	chr18	61346309	61346579	+	49.6	0.885	intron (NM_133249, intron 1 of 11)	intron (NM_133249, intron 1 of 11)	53987	NM_133249	Mm.415302	NM_133249	ENSMUSG00000033871	Ppargc1b	4631412G21Rik|Perc	peroxisome proliferative activated receptor, gamma, coactivator 1 beta	protein-coding	Ppargc1b	10459193	0.190788	0.0142182	24	12.5	0.192591	166.531	134.858	190.135	208.248	173.827	153.671
19288	chr3-182	chr3	66220595	66220865	+	17.5	0.714	exon (NM_008987, exon 2 of 3)	exon (NM_008987, exon 2 of 3)	843	NM_008987	Mm.276776	NM_008987	ENSMUSG00000027832	Ptx3	AI607804|TSG-14	pentraxin related gene	protein-coding	Ptx3	10492448	0.190788	0.0142182	24	14.5	0.114806	53.8282	51.7544	57.7636	56.3249	63.1872	58.42
67804	chr18-133	chr18	53176408	53176678	+	16.8	0.6	intron (NM_026386, intron 1 of 14)	CpG	178	NM_026386	Mm.252171	NM_026386	ENSMUSG00000034484	Snx2	0610030A03Rik	sorting nexin 2	protein-coding	Snx2	10455738	0.190788	0.0142182	24	5	0.10468	270.796	334.177	285.323	298.993	269.431	269.317
116873	chr5-205	chr5	53933714	53933984	+	19	0.935	Intergenic	Intergenic	-64674	NM_001081103	Mm.265985	NM_054083	ENSMUSG00000039156	Stim2	-	stromal interaction molecule 2	protein-coding	Stim2	10521950	0.190788	0.0142182	24	1	0.0520148	9.59294	9.37321	9.32685	9.19838	9.29965	9.51466
319880	chr10-141	chr10	94515211	94515481	+	19.7	0.548	intron (NM_172051, intron 1 of 3)	CpG	489	NM_172051	Mm.23047	NM_172051	ENSMUSG00000020023	Tmcc3	AW488095|C630016B22Rik|C88213|Tmcc1	transmembrane and coiled coil domains 3	protein-coding	Tmcc3	10365891	0.190788	0.0142182	24	9	0.0822507	181.362	178.164	209.138	213.241	179.882	174.538
56363	chr1-584	chr1	50370247	50370517	+	21.9	0.886	Intergenic	MERVL-int|LTR|ERVL	-557141	NM_019790	Mm.245154	NM_019790	ENSMUSG00000026109	Tmeff2	4832418D20Rik|7630402F16Rik|TR-2	transmembrane protein with EGF-like and two follistatin-like domains 2	protein-coding	Tmeff2	10346150	0.190788	0.0142182	24	5	0.0865852	124.225	137.793	120.82	138.81	126.644	107.46
223435	chr15-35	chr15	27931977	27932247	+	27	0.851	intron (NM_001081302, intron 1 of 56)	intron (NM_001081302, intron 1 of 56)	93736	NM_001081302	Mm.485422	NM_001081302	ENSMUSG00000022263	Trio	6720464I07Rik|AA408740|Solo	triple functional domain (PTPRF interacting)	protein-coding	Trio	10427928	0.190788	0.0142182	24	9.5	0.150387	216.702	202.535	227.292	233.317	197.314	183.298
170644	chr16-447	chr16	5070234	5070504	+	10.9	0.8	intron (NM_026666, intron 8 of 18)	intron (NM_026666, intron 8 of 18)	20301	NM_026666	Mm.66356	NM_026666	ENSMUSG00000039473	Ubn1	1110029L11Rik|2610108L02Rik|AA673476|AW124741	ubinuclein 1	protein-coding	Ubn1	10433352	0.190788	0.0142182	24	10.5	0.0636396	174.824	192.501	191.683	216.072	185.199	182.219
54401	chr2-769	chr2	163994742	163995012	+	13.1	0.6	promoter-TSS (NM_018753)	promoter-TSS (NM_018753)	-320	NM_018753	Mm.34319	NM_018753	ENSMUSG00000018326	Ywhab	1300003C17Rik|14-3-3b	tyrosine 3-monooxygenase/tryptophan 5-monooxygenase activation protein, beta polypeptide	protein-coding	Ywhab	10478424	0.190788	0.0142182	24	5	0.0595525	615.523	751.584	636.087	673.858	585.904	623.225
66218	chr15-53	chr15	58986536	58986806	+	24.1	0.804	intron (NM_001146180, intron 3 of 13)	intron (NM_001146180, intron 3 of 13)	52861	NM_023172	Mm.322294	NM_023172	ENSMUSG00000022354	Ndufb9	1190008J14Rik	NADH dehydrogenase (ubiquinone) 1 beta subcomplex, 9	protein-coding	Ndufb9	10424340	0.211585	0.0158047	24	13	0.0432042	4505.9	4307.99	4474.78	4718.13	4325.05	4277.35
272347	chr6-95	chr6	47835598	47835868	+	22.6	0.717	promoter-TSS (NM_027477)	promoter-TSS (NM_027477)	72	NM_173034	Mm.169059	NM_027477	ENSMUSG00000062519	Zfp398	5730513I23Rik	zinc finger protein 398	protein-coding	Zfp398	10537911	0.211585	0.0158047	24	7.5	0.11337	7.04283	7.14104	7.19752	7.20905	6.96368	6.87866
78896	chr1-350	chr1	43778539	43778809	+	16	0.706	intron (NM_026430, intron 7 of 14)	intron (NM_026430, intron 7 of 14)	48072	NM_024283	Mm.50109	NM_024283	ENSMUSG00000026051	1500015O10Rik	Ecrg4	RIKEN cDNA 1500015O10 gene	protein-coding	1500015O10Rik	10345921	0.215927	0.0173912	24	14	0.156667	49.3237	49.3019	59.655	58.6151	56.8993	51.8503
70808	chr3-348	chr3	19895043	19895313	+	13.1	0.786	non-coding (NR_027985, exon 1 of 1)	non-coding (NR_027985, exon 1 of 1)	307	NR_027985	Mm.427103	NR_027985	ENSMUSG00000048106	4632415L05Rik	AI662792	RRS1 ribosome biogenesis regulator homolog pseudogene	pseudo	4632415L05Rik	10490986	0.215927	0.0173912	24	20	0.0572544	118.309	106.18	96.9024	102.933	102.347	120.947
11745	chr5-818	chr5	96793473	96793743	+	12.4	0.741	intron (NM_013470, intron 1 of 12)	intron (NM_013470, intron 1 of 12)	223	NM_013470	Mm.7214	NM_013470	ENSMUSG00000029484	Anxa3	Anx3	annexin A3	protein-coding	Anxa3	10523451	0.215927	0.0173912	24	7	0.218298	281.437	348.591	358.257	311.159	308.108	266.587
11792	chr14-126	chr14	50924843	50925113	+	21.9	0.68	promoter-TSS (NM_009687)	promoter-TSS (NM_009687)	29	NM_009687	Mm.203	NM_009687	ENSMUSG00000035960	Apex1	APE|Apex|HAP1|Ref-1	apurinic/apyrimidinic endonuclease 1	protein-coding	Apex1	10414522	0.215927	0.0173912	24	17	0.0709299	216.248	203.013	201.728	209.746	217.631	228.264
12490	chr1-932	chr1	194879488	194879758	+	10.9	0.679	Intergenic	Intergenic	-59198	NM_133654	Mm.29798	NM_133654	ENSMUSG00000016494	Cd34	AU040960	CD34 antigen	protein-coding	Cd34	10352905	0.215927	0.0173912	24	12	0.110676	934.227	1055.35	1047.55	1096.51	1042.62	852.384
241447	chr2-617	chr2	68861376	68861646	+	14.6	0.636	promoter-TSS (NM_001347161)	promoter-TSS (NM_001347161)	70	NM_172856	Mm.222222	NM_172856	ENSMUSG00000027035	Cers6	4732462C07Rik|AW544719|Lass6|T1L	ceramide synthase 6	protein-coding	Lass6	10472501	0.215927	0.0173912	24	6	0.11569	5.83347	6.3741	6.0652	6.08907	5.97167	5.75558
13482	chr2-1843	chr2	62411601	62411871	+	9.48	0.722	intron (NM_001159543, intron 1 of 24)	intron (NM_001159543, intron 1 of 24)	495	NM_010074	Mm.1151	NM_010074	ENSMUSG00000035000	Dpp4	Cd26|Dpp-4|THAM	dipeptidylpeptidase 4	protein-coding	Dpp4	10483046	0.215927	0.0173912	24	6.5	0.0851215	94.3009	175.464	105.354	117.454	116.765	90.6905
80752	chr5-894	chr5	138694258	138694528	+	10.2	0.652	Intergenic	Intergenic	-60688	NM_030565	Mm.320355	NM_030565	ENSMUSG00000025854	Fam20c	C76981|DMP-4|DMP4|GEF-CK|mKIAA4081	family with sequence similarity 20, member C	protein-coding	Fam20c	10526853	0.215927	0.0173912	24	9	0.124373	130.878	134.858	177.622	156.44	113.1	120.528
14775	chr9-145	chr9	108339290	108339560	+	19.7	0.604	exon (NM_008160, exon 1 of 2)	exon (NM_008160, exon 1 of 2)	345	NM_001329527	Mm.1090	NM_008160	ENSMUSG00000063856	Gpx1	AI195024|AL033363|CGPx|GPx-1|GSHPx-1|Gpx	glutathione peroxidase 1	protein-coding	Gpx1	10588899	0.215927	0.0173912	24	2.5	0.0401354	8.8371	9.08504	8.71454	8.87721	8.55815	8.82397
15015	chr17-692	chr17	35379455	35379725	+	12.4	0.613	promoter-TSS (NM_001143689)	promoter-TSS (NM_001143689)	-27	NM_001143689	Mm.464284	NM_001143689	ENSMUSG00000035929	H2-Q4	H-2Q4|H2-Gs10|Qa-4|Qa4|Qat-4|Qb-1|Qb1	histocompatibility 2, Q region locus 4	protein-coding	H2-Q4	10444814	0.215927	0.0173912	24	5	0.25668	85.789	140.272	91.789	107.86	91.6581	69.6036
16403	chr2-1842	chr2	71787124	71787394	+	9.48	0.615	exon (NM_008397, exon 1 of 26)	exon (NM_008397, exon 1 of 26)	320	NM_008397	Mm.225096	NM_008397	ENSMUSG00000027111	Itga6	5033401O05Rik|AI115430|Cd49f|VLA-6	integrin alpha 6	protein-coding	Itga6	10472820	0.215927	0.0173912	24	11	0.285014	229.686	348.308	347.375	455.21	269.102	249.693
226519	chr1-648	chr1	153308217	153308487	+	14.6	0.629	intron (NM_010683, intron 1 of 27)	intron (NM_010683, intron 1 of 27)	24434	NM_010683	Mm.1249	NM_010683	ENSMUSG00000026478	Lamc1	Lamb2	laminin, gamma 1	protein-coding	Lamc1	10358816	0.215927	0.0173912	24	9	0.0986343	591.117	664.723	651.125	649.578	603.542	551.574
380836	chr13-31	chr13	25020203	25020473	+	29.9	0.712	promoter-TSS (NM_001013389)	promoter-TSS (NM_001013389)	-21	NM_001013389	Mm.387097	NM_001013389	ENSMUSG00000021339	Mrs2	Gm902|HPT|Mrs2l|RPT	MRS2 magnesium transporter	protein-coding	Mrs2	10408348	0.215927	0.0173912	24	10	0.0671893	278.563	306.922	298.544	316.21	275.561	305.496
18844	chr6-107	chr6	89328088	89328358	+	23.3	0.679	intron (NM_008881, intron 23 of 31)	intron (NM_008881, intron 23 of 31)	34390	NM_008881	Mm.3789	NM_008881	ENSMUSG00000030084	Plxna1	2600013D04Rik|NOV|PlexA1|Plxn1|mKIAA4053	plexin A1	protein-coding	Plxna1	10546184	0.215927	0.0173912	24	7	0.0478004	271.491	284.894	277.638	293.631	237.211	265.239
241694	chr2-605	chr2	146512021	146512291	+	12.4	0.625	promoter-TSS (NM_001033348)	promoter-TSS (NM_001033348)	-152	NM_001033348	Mm.222310	NM_001033348	ENSMUSG00000037110	Ralgapa2	A230067G21Rik|AS250|BC053994|RGC2|pp250	Ral GTPase activating protein, alpha subunit 2 (catalytic)	protein-coding	Ralgapa2	10488322	0.215927	0.0173912	24	6	0.0429992	178.79	227.695	167.365	191.968	166.98	172.739
67889	chr2-268	chr2	36136657	36136927	+	18.2	0.667	promoter-TSS (NM_026434)	promoter-TSS (NM_026434)	-88	NM_026434	Mm.205937	NM_026434	ENSMUSG00000026889	Rbm18	2010004P11Rik|AU015530	RNA binding motif protein 18	protein-coding	Rbm18	10482109	0.215927	0.0173912	24	7	0.0303066	552.53	580.479	578.743	590.192	563.488	531.358
218215	chr13-145	chr13	47224226	47224496	+	16.8	0.758	intron (NM_001170643, intron 3 of 7)	intron (NM_001170643, intron 3 of 7)	30358	NM_001170643	Mm.287609	NM_146042	ENSMUSG00000038068	Rnf144b	BC025007|E130105P19Rik|Ibrdc2|Pir2	ring finger protein 144B	protein-coding	Rnf144b	10404965	0.215927	0.0173912	24	17	0.218418	8.82795	8.75089	9.02149	9.07188	9.05326	9.13542
215615	chr1-88	chr1	135283861	135284131	+	21.1	0.714	promoter-TSS (NM_145417)	promoter-TSS (NM_145417)	88	NM_001159624	Mm.291048	NM_145417	ENSMUSG00000041926	Rnpep	-	arginyl aminopeptidase (aminopeptidase B)	protein-coding	Rnpep	10358038	0.215927	0.0173912	24	6	0.0759008	7.5897	7.712	7.45946	7.55259	7.43909	7.48236
20112	chr17-47	chr17	7187102	7187372	+	27	0.792	intron (NM_011299, intron 1 of 20)	intron (NM_011299, intron 1 of 20)	17122	NM_011299	Mm.268383	NM_011299	ENSMUSG00000023809	Rps6ka2	90kDa|D17Wsu134e|Rps6ka-rs1|Rsk3|p90rsk|pp90rsk	ribosomal protein S6 kinase, polypeptide 2	protein-coding	Rps6ka2	10441565	0.215927	0.0173912	24	11	0.0596798	1431.29	1378.42	1535.4	1643.78	1461.47	1399.6
54353	chr6-898	chr6	51857864	51858134	+	8.75	0.812	Intergenic	Intergenic	154550	NM_018773	Mm.221479	NM_018773	ENSMUSG00000059182	Skap2	2610021A10Rik|AA960083|BB137539|RA70|SKAP-HOM|Saps|Scap2|mSKAP55R	src family associated phosphoprotein 2	protein-coding	Skap2	10544732	0.215927	0.0173912	24	4	0.097807	78.3407	104.84	84.9369	82.9586	67.1144	77.7241
20524	chr15-275	chr15	81360683	81360953	+	15.3	0.585	promoter-TSS (NM_011399)	promoter-TSS (NM_011399)	-53	NM_011399	Mm.222536	NM_011399	ENSMUSG00000022404	Slc25a17	34kDa|47kDa|PMP34|Pmp47	solute carrier family 25 (mitochondrial carrier, peroxisomal membrane protein), member 17	protein-coding	Slc25a17	10430711	0.215927	0.0173912	24	13	0.122252	256.355	286.472	322.944	325.33	301.595	293.362
76630	chr19-151	chr19	34192507	34192777	+	16.8	0.658	intron (NM_029682, intron 1 of 10)	CpG	372	NM_029682	Mm.130952	NM_029682	ENSMUSG00000024776	Stambpl1	1700095N21Rik|8230401J17Rik|ALMalpha|AMSH-FP	STAM binding protein like 1	protein-coding	Stambpl1	10462587	0.215927	0.0173912	24	4.5	0.105734	67.4815	100.721	82.3433	77.2857	72.3078	75.0599
214133	chr3-279	chr3	133673157	133673427	+	14.6	0.605	Intergenic	LTR33B|LTR|ERVL	-128902	NM_001346736	Mm.347816	NM_145989	ENSMUSG00000040943	Tet2	Ayu17-449|E130014J05Rik|mKIAA1546	tet methylcytosine dioxygenase 2	protein-coding	Tet2	10502284	0.215927	0.0173912	24	5	0.12479	7.94962	8.21587	8.49402	8.11957	7.79129	8.17626
21812	chr4-247	chr4	47293741	47294011	+	19	0.737	intron (NM_009928, intron 28 of 39)	MIR3|SINE|MIR	-59346	NM_009370	Mm.197552	NM_009370	ENSMUSG00000007613	Tgfbr1	ALK5|AU017191|Alk-5|ESK2|TGFR-1|TbetaR-I|TbetaRI	transforming growth factor, beta receptor I	protein-coding	Tgfbr1	10504817	0.215927	0.0173912	24	3.5	0.0893076	477.511	482.893	449.906	437.485	420.706	463.286
235135	chr9-266	chr9	31595110	31595380	+	17.5	0.619	Intergenic	MIRc|SINE|MIR	-131007	NM_144936	Mm.390134	NM_144936	ENSMUSG00000041737	Tmem45b	BC018222	transmembrane protein 45b	protein-coding	Tmem45b	10592044	0.215927	0.0173912	24	5	0.145876	53.9387	163.67	52.5883	69.0232	51.6165	63.9477
22224	chr8-49	chr8	119910876	119911146	+	29.9	0.641	intron (NM_001310630, intron 1 of 13)	CpG	651	NM_001310630	Mm.256910	NM_009462	ENSMUSG00000031826	Usp10	2610014N07Rik|UBPO|Uchrp|mKIAA0190	ubiquitin specific peptidase 10	protein-coding	Usp10	10575961	0.215927	0.0173912	24	7	0.0670054	9.29158	9.25129	9.22155	9.41995	9.114	9.099
68980	chr16-191	chr16	32247097	32247367	+	15.3	0.676	promoter-TSS (NM_026898)	promoter-TSS (NM_026898)	5	NM_001185162	Mm.159860	NM_026898	ENSMUSG00000022787	Wdr53	1500002B03Rik|AI848860	WD repeat domain 53	protein-coding	Wdr53	10435015	0.215927	0.0173912	24	16	0.0883813	6.10874	6.39551	6.3225	6.43056	6.51795	6.46558
668923	chr2-1000	chr2	150451265	150451535	+	11.7	0.704	intron (NM_001310645, intron 1 of 3)	intron (NM_001310645, intron 1 of 3)	101	NM_001310645	Mm.393876	NM_001177550	ENSMUSG00000068130	Zfp442	OTTMUSG00000015730|ZIPO-II	zinc finger protein 442	protein-coding	Zfp442	10488459	0.215927	0.0173912	24	10	0.0458276	4.66604	4.60486	4.5872	4.89156	4.56118	4.46869
101197	chr6-739	chr6	47978860	47979130	+	10.9	0.714	Intergenic	Intergenic	25605	NM_178898	Mm.241063	NM_178898	ENSMUSG00000045466	Zfp956	AI894139	zinc finger protein 956	protein-coding	Zfp956	10537938	0.215927	0.0173912	24	16.5	0.0605743	85.8461	83.5461	83.9443	84.4245	97.4655	88.834
240613	chr19-341	chr19	29804898	29805168	+	12.4	0.714	intron (NM_172836, intron 1 of 7)	intron (NM_172836, intron 1 of 7)	976	NM_172836	Mm.313351	NM_172836	ENSMUSG00000046138	9930021J03Rik	ENSMUSG00000048936|Gm9832|mKIAA2026	RIKEN cDNA 9930021J03 gene	protein-coding	9930021J03Rik	10466963	0.242857	0.0211898	24	8	0.0928148	378.22	413.175	413.703	434.593	387.123	395.54
216725	chr11-93	chr11	50672958	50673228	+	25.5	0.69	intron (NM_175643, intron 3 of 21)	intron (NM_175643, intron 3 of 21)	71008	NM_175643	Mm.110597	NM_175643	ENSMUSG00000036545	Adamts2	ADAM-TS 2|ADAM-TS2|ADAMTS-2|PC I-NP|PCINP|pNPI	a disintegrin-like and metallopeptidase (reprolysin type) with thrombospondin type 1 motif, 2	protein-coding	Adamts2	10375751	0.242857	0.0211898	24	9	0.144681	229.665	273.749	253.818	251.813	225.221	217.021
78560	chr8-676	chr8	27073600	27073870	+	13.1	0.667	Intergenic	(TG)n|Simple_repeat|Simple_repeat	-12106	NM_054044	Mm.87046	NM_054044	ENSMUSG00000031486	Adgra2	8430414O08Rik|9530074E10Rik|Gpr124|Tem5|mKIAA1531	adhesion G protein-coupled receptor A2	protein-coding	Gpr124	10571142	0.242857	0.0211898	24	12	0.0596657	6.09109	6.13549	6.37544	6.36906	6.04786	6.04732
11640	chr11-1329	chr11	88823095	88823365	+	10.9	0.857	Intergenic	Intergenic	28273	NM_009648	Mm.2969	NM_009648	ENSMUSG00000018428	Akap1	AKAP121|AKAP84|Akap|C76494|C81186|DAKAP1|S-AKAP84	A kinase (PRKA) anchor protein 1	protein-coding	Akap1	10389701	0.242857	0.0211898	24	13	0.177272	354.881	361.81	501.846	498.974	369.044	396.949
54194	chr17-223	chr17	32350244	32350514	+	19	0.623	intron (NM_017476, intron 1 of 13)	intron (NM_017476, intron 1 of 13)	198	NM_017476	Mm.281005	NM_017476	ENSMUSG00000002625	Akap8l	HAP95|Nakap95	A kinase (PRKA) anchor protein 8-like	protein-coding	Akap8l	10449854	0.242857	0.0211898	24	12	0.0349405	252.413	264.585	261.314	272.963	278.289	266.81
407823	chr2-587	chr2	60071828	60072098	+	12.4	0.71	intron (NM_001001182, intron 2 of 35)	intron (NM_001001182, intron 2 of 35)	53777	NM_001001182	Mm.228071	NM_001001182	ENSMUSG00000026987	Baz2b	5830435C13Rik|BC053917|D2Ertd794e	bromodomain adjacent to zinc finger domain, 2B	protein-coding	Baz2b	10482880	0.242857	0.0211898	24	7.5	0.0570706	247.305	273.154	271.419	285.111	251.813	247.738
207165	chr11-771	chr11	107131189	107131459	+	14.6	0.71	exon (NM_176850, exon 1 of 28)	exon (NM_176850, exon 1 of 28)	598	NM_176850	Mm.343986	NM_176850	ENSMUSG00000040481	Bptf	9430093H17Rik|Falz	bromodomain PHD finger transcription factor	protein-coding	Bptf	10392300	0.242857	0.0211898	24	5	0.0749462	309.582	327.198	333.527	322.324	277.53	311.518
217207	chr11-646	chr11	101740242	101740512	+	14.6	0.545	intron (NM_144831, intron 7 of 22)	intron (NM_144831, intron 7 of 22)	7421	NM_144831	Mm.28186	NM_144831	ENSMUSG00000034931	Dhx8	Ddx8|mDEAH6|mKIAA4096	DEAH (Asp-Glu-Ala-His) box polypeptide 8	protein-coding	Dhx8	10381477	0.242857	0.0211898	24	11.5	0.0344502	201.555	209.097	208.478	220.56	196.547	202.933
100037258	chr14-248	chr14	118938128	118938398	+	15.3	0.757	intron (NM_008929, intron 1 of 11)	CpG	331	NM_008929	Mm.12616	NM_008929	ENSMUSG00000022136	Dnajc3	AA408985|AU067833|Dnajc3a|Dnajc3b|Prkri|mp58|p58|p58IPK	DnaJ heat shock protein family (Hsp40) member C3	protein-coding	Dnajc3	10417013	0.242857	0.0211898	24	5.5	0.000141421	347.604	394.852	349.932	361.592	351.556	350.565
13690	chr7-59	chr7	111082830	111083100	+	24.8	0.632	promoter-TSS (NM_013507)	promoter-TSS (NM_013507)	65	NM_013507	Mm.185453	NM_013507	ENSMUSG00000005610	Eif4g2	DAP-5|E130105L11Rik|Nat1|Natm1|p97	eukaryotic translation initiation factor 4, gamma 2	protein-coding	Eif4g2	10566966	0.242857	0.0211898	24	8	0.026163	2892.5	2937.96	2878.7	2885.09	2730.03	2735.33
75320	chr6-37	chr6	143167005	143167275	+	30.6	0.596	promoter-TSS (NM_029250)	promoter-TSS (NM_029250)	-90	NM_029250	Mm.272548	NM_029250	ENSMUSG00000030275	Etnk1	1110061E11Rik|4930555L11Rik|AI195356|AI841245|C80956|D6Ertd3e|EKI1	ethanolamine kinase 1	protein-coding	Etnk1	10542677	0.242857	0.0211898	24	5.5	0.111094	230.008	267.759	259.734	268.8	228.437	211.002
218850	chr14-417	chr14	27428529	27428799	+	10.9	0.516	promoter-TSS (NM_001114879)	promoter-TSS (NM_001114879)	-183	NM_028945	Mm.247767	NM_028945	ENSMUSG00000040651	Fam208a	4732418E12|4933409E02Rik|D14Abb1e|MommeD6	family with sequence similarity 208, member A	protein-coding	D14Abb1e	10413434	0.242857	0.0211898	24	5.5	0.0868115	7.1114	7.51596	7.35607	7.38935	7.10356	7.2023
14782	chr8-725	chr8	33653488	33653758	+	11.7	0.688	exon (NM_010344, exon 1 of 13)	exon (NM_010344, exon 1 of 13)	385	NM_010344	Mm.283573	NM_010344	ENSMUSG00000031584	Gsr	AI325518|D8Ertd238e|Gr-1|Gr1	glutathione reductase	protein-coding	Gsr	10571274	0.242857	0.0211898	24	10.5	0.0766362	375.024	378.424	399.131	421.91	407.142	375.578
12282	chr9-80	chr9	44379243	44379513	+	25.5	0.574	promoter-TSS (NM_021395)	promoter-TSS (NM_021395)	-112	NM_021395	Mm.116721	NM_021395	ENSMUSG00000032115	Hyou1	AI415631|CBP-140|Cab140|Grp170|Orp150	hypoxia up-regulated 1	protein-coding	Hyou1	10584712	0.242857	0.0211898	24	6	0.0194172	207.974	204.386	203.082	208.741	204.053	207.375
319765	chr16-328	chr16	22163330	22163600	+	11.7	0.724	promoter-TSS (NM_183029)	promoter-TSS (NM_183029)	-166	NM_183029	Mm.489442	NM_183029	ENSMUSG00000033581	Igf2bp2	C330012H03Rik|IMP-2|Imp2|Neilsen	insulin-like growth factor 2 mRNA binding protein 2	protein-coding	Igf2bp2	10438603	0.242857	0.0211898	24	5.5	0.0571342	44.4145	42.5548	48.9196	43.5681	37.5758	38.3366
16348	chr4-1016	chr4	48279613	48279883	+	10.9	0.556	promoter-TSS (NM_029572)	promoter-TSS (NM_029572)	-12	NM_010569	Mm.317706	NM_010569	ENSMUSG00000028344	Invs	Nphp2|inv	inversin	protein-coding	Invs	10504865	0.242857	0.0211898	24	21	0.080398	100.404	92.9215	89.1875	83.2466	93.8913	97.3109
73473	chr18-248	chr18	32067826	32068096	+	13.9	0.714	5' UTR (NM_173441, exon 1 of 14)	5' UTR (NM_173441, exon 1 of 14)	227	NM_173441	Mm.66853	NM_173441	ENSMUSG00000024384	Iws1	1700069O15Rik|3000008H23|AL117927|AW214353	IWS1, SUPT6 interacting protein	protein-coding	Iws1	10454525	0.242857	0.0211898	24	8	0.00952473	331.446	318.376	348.129	345.088	321.267	312.894
17155	chr10-258	chr10	54075518	54075788	+	17.5	0.529	promoter-TSS (NR_038016)	promoter-TSS (NR_038016)	143	NM_008548	Mm.117294	NM_008548	ENSMUSG00000003746	Man1a	Man1a1|PCR1	mannosidase 1, alpha	protein-coding	Man1a	10369154	0.242857	0.0211898	24	4.5	0.0799808	196.947	338.38	208.512	198.329	220.066	177.902
17158	chr17-830	chr17	64630502	64630772	+	9.48	0.667	intron (NM_008549, intron 3 of 21)	intron (NM_008549, intron 3 of 21)	28988	NM_008549	Mm.2433	NM_008549	ENSMUSG00000024085	Man2a1	Mana-2|Mana2|Map-2	mannosidase 2, alpha 1	protein-coding	Man2a1	10446376	0.242857	0.0211898	24	2	0.0791677	290.932	333.033	261.314	293.951	280.857	266.487
17200	chr18-533	chr18	68474857	68475127	+	8.75	0.765	Intergenic	Intergenic	-45672	NM_008560	Mm.426053	NM_008560	ENSMUSG00000045569	Mc2r	ACTH-R|ACTHR|MC2-R	melanocortin 2 receptor	protein-coding	Mc2r	10459611	0.242857	0.0211898	24	4	0.0565261	17.1421	19.9966	17.5772	16.694	16.3425	17.2142
207911	chr15-588	chr15	81219066	81219336	+	10.9	0.762	Intergenic	Intergenic	-16298	NM_145132	Mm.323523	NM_145132	ENSMUSG00000050164	Mchr1	AW049955|Gpr24|Mch1r	melanin-concentrating hormone receptor 1	protein-coding	Mchr1	10425507	0.242857	0.0211898	24	18	0.030045	134.545	126.465	139.101	121.917	142.458	149.42
100019	chr4-747	chr4	32656980	32657250	+	12.4	0.559	promoter-TSS (NM_001081392)	promoter-TSS (NM_001081392)	-4	NM_001081392	Mm.24627	NM_133874	ENSMUSG00000058006	Mdn1	4833432B22Rik|A130070M06|AA958993|D4Abb1e|Gm135	midasin AAA ATPase 1	protein-coding	Mdn1	10503723	0.242857	0.0211898	24	5	0.0387707	7.07068	7.21526	7.19387	7.23872	7.08542	7.17807
17342	chr6-405	chr6	97807051	97807321	+	13.9	0.625	exon (NM_001113198, exon 1 of 10)	exon (NM_001113198, exon 1 of 10)	128	NM_001113198	Mm.333284	NM_008601	ENSMUSG00000035158	Mitf	BCC2|Bhlhe32|Gsfbcc2|Vitiligo|Wh|bw|mi|vit	microphthalmia-associated transcription factor	protein-coding	Mitf	10540248	0.242857	0.0211898	24	4.5	0.0508975	8.41459	8.42941	8.40234	8.39594	8.20269	8.30024
17380	chr3-947	chr3	63516345	63516615	+	8.75	0.6	Intergenic	Intergenic	220385	NM_001289463	Mm.296022	NM_008604	ENSMUSG00000027820	Mme	6030454K05Rik|C85356|CALLA|CD10|NEP|SFE	membrane metallo endopeptidase	protein-coding	Mme	10492355	0.242857	0.0211898	24	3	0.145353	6.58773	6.98701	6.47543	6.46118	6.50645	6.66587
210356	chr1-554	chr1	126484849	126485119	+	13.9	0.778	intron (NM_001081756, intron 3 of 16)	intron (NM_001081756, intron 3 of 16)	7943	NM_172484	Mm.377234	NM_172484	ENSMUSG00000049690	Nckap5	8430408F21|D130011D22Rik|E030049G20Rik|Erih1|Erih2|Gm1548|Nap5	NCK-associated protein 5	protein-coding	Nckap5	10357345	0.242857	0.0211898	24	14	0.131642	46.4553	56.0651	58.9561	60.787	53.9922	59.022
27057	chr14-153	chr14	32160063	32160333	+	16.8	0.463	intron (NM_001033988, intron 1 of 9)	CpG	311	NM_001033988	Mm.371598	NM_019744	ENSMUSG00000056234	Ncoa4	ARA70|Rfg	nuclear receptor coactivator 4	protein-coding	Ncoa4	10399198	0.242857	0.0211898	24	6	0	8.82113	9.0924	8.84916	9.03728	8.8748	8.84235
664883	chr12-389	chr12	46707823	46708093	+	11.7	0.513	intron (NM_021361, intron 4 of 4)	intron (NM_021361, intron 4 of 4)	110817	NM_021361	Mm.247195	NM_021361	ENSMUSG00000021047	Nova1	9430099M15Rik|G630039L02|Nova-1	neuro-oncological ventral antigen 1	protein-coding	Nova1	10400155	0.242857	0.0211898	24	6	0.133308	209.548	400.018	263.059	262.19	268.798	219.228
70699	chr6-215	chr6	35177429	35177699	+	16	0.651	promoter-TSS (NM_027513)	promoter-TSS (NM_027513)	-52	NM_027513	Mm.261208	NM_027513	ENSMUSG00000038759	Nup205	3830404O05Rik|AV248391|mKIAA0225	nucleoporin 205	protein-coding	Nup205	10537246	0.242857	0.0211898	24	7	0.0769898	209.755	235.532	242.308	238.352	207.049	228.043
64291	chr18-369	chr18	12955917	12956187	+	10.9	0.76	Intergenic	Intergenic	-14211	NM_207530	Mm.259470	NM_020573	ENSMUSG00000044252	Osbpl1a	G430090F17Rik|Gm753|ORP-1|Osbpl1b	oxysterol binding protein-like 1A	protein-coding	Osbpl1a	10457546	0.242857	0.0211898	24	13	0.105514	7.6073	7.6375	7.77939	7.77508	7.71055	7.64811
18711	chr1-237	chr1	65186641	65186911	+	17.5	0.681	promoter-TSS (NM_001310624)	promoter-TSS (NM_001310624)	91	NM_001310624	Mm.38370	NM_011086	ENSMUSG00000025949	Pikfyve	5230400C17Rik|Pip5k|Pip5k3|Pipk5k3|PipkIII|p235	phosphoinositide kinase, FYVE finger containing	protein-coding	Pikfyve	10346970	0.242857	0.0211898	24	5	0.0660155	6.88118	7.06835	7.05921	7.01323	6.92117	6.95467
353047	chr11-801	chr11	103412287	103412557	+	14.6	0.583	intron (NM_183034, intron 1 of 11)	CpG	242	NM_183034	Mm.18556	NM_183034	ENSMUSG00000034247	Plekhm1	AP162|B2|BC038943|D330036J23Rik	pleckstrin homology domain containing, family M (with RUN domain) member 1	protein-coding	Plekhm1	10391918	0.242857	0.0211898	24	8	0.0676913	182.094	213.139	204.114	207.184	177.88	179.61
59029	chr2-1251	chr2	61711787	61712057	+	10.9	0.773	intron (NM_021526, intron 1 of 11)	CpG	228	NM_021526	Mm.218198	NM_021526	ENSMUSG00000026914	Psmd14	2610312C03Rik|3200001M20Rik|AA986732|Pad1|Poh1|rpm11	proteasome (prosome, macropain) 26S subunit, non-ATPase, 14	protein-coding	Psmd14	10472300	0.242857	0.0211898	24	15	0.0130815	1345.48	1255.29	1367	1362.84	1360.86	1393.12
208768	chr1-114	chr1	180850715	180850985	+	21.9	0.565	promoter-TSS (NM_145943)	promoter-TSS (NM_145943)	-301	NM_145943	Mm.272625	NM_145943	ENSMUSG00000038806	Sde2	-	SDE2 telomere maintenance homolog (S. pombe)	protein-coding	BC031781	10352294	0.242857	0.0211898	24	14	0.149666	170.908	164.571	201.569	206.171	202.846	197.422
68549	chr1-302	chr1	57996017	57996287	+	16.8	0.583	5' UTR (NM_199007, exon 1 of 9)	5' UTR (NM_199007, exon 1 of 9)	178	NM_199007	Mm.32800	NM_199007	ENSMUSG00000026039	Sgol2a	1110007N04Rik|4932411A20Rik|5730576N04Rik|AU018846|AV008062|D1Ertd8e|Sgol2|Tripin	shugoshin-like 2a (S. pombe)	protein-coding	Sgol2	10346365	0.242857	0.0211898	24	15.5	6.28e-16	5.2427	5.30934	5.74291	5.82878	5.57512	5.88092
70661	chr9-103	chr9	46015353	46015623	+	22.6	0.767	intron (NM_027498, intron 1 of 24)	intron (NM_027498, intron 1 of 24)	2668	NM_027498	Mm.219459	NM_027498	ENSMUSG00000034135	Sik3	5730525O22Rik|9030204A07Rik|AI447252|AI846254|AI849445|Qsk|SIK-3|mKIAA0999	SIK family kinase 3	protein-coding	Sik3	10584977	0.242857	0.0211898	24	13	0.0806667	393.287	379.025	424.312	420.695	398.435	405.203
384309	chr5-99	chr5	137152267	137152537	+	25.5	0.647	Intergenic	Intergenic	-36195	NM_201373	Mm.100647	NM_201373	ENSMUSG00000043279	Trim56	A130009K11Rik|Gm452|RNF109	tripartite motif-containing 56	protein-coding	Trim56	10534679	0.242857	0.0211898	24	12	0.0148351	218.297	243.571	244.798	239.307	237.216	221.838
380912	chr14-100	chr14	65358322	65358592	+	19.7	0.62	promoter-TSS (NM_199029)	promoter-TSS (NM_199029)	-219	NM_199029	Mm.270087	NM_199029	ENSMUSG00000034522	Zfp395	BC053701|Gm910	zinc finger protein 395	protein-coding	Zfp395	10415991	0.242857	0.0211898	24	7	0.0511521	165.516	158.096	191.09	173.467	152.155	169.864
242109	chr3-358	chr3	98382324	98382594	+	13.9	0.647	promoter-TSS (NM_172863)	promoter-TSS (NM_172863)	-22	NM_172863	Mm.358911	NM_172863	ENSMUSG00000050064	Zfp697	9430053K19|AI467503|Znf697	zinc finger protein 697	protein-coding	Zfp697	10494655	0.242857	0.0211898	24	17	0.0802213	71.5188	69.0878	68.6296	80.8721	77.2509	70.8148
67157	chr4-516	chr4	10874005	10874275	+	13.9	0.548	promoter-TSS (NM_026005)	promoter-TSS (NM_026005)	-358	NM_026005	Mm.440552	NM_026005	ENSMUSG00000059482	2610301B20Rik	AI428449	RIKEN cDNA 2610301B20 gene	protein-coding	2610301B20Rik	10503251	0.271867	0.0257197	24	18	0.0589656	170.112	169.927	164.058	194.24	179.904	190.945
233103	chr7-1174	chr7	34277737	34278007	+	10.2	0.842	intron (NM_172741, intron 1 of 12)	intron (NM_172741, intron 1 of 12)	7737	NM_172741	Mm.491097	NM_172741	ENSMUSG00000066571	4931406P16Rik	AA553327|mKIAA0355	RIKEN cDNA 4931406P16 gene	protein-coding	4931406P16Rik	10562368	0.271867	0.0257197	24	10	0.0737159	698.807	701.875	754.543	751.646	694.745	680.636
75894	chr2-747	chr2	121139895	121140165	+	13.1	0.512	promoter-TSS (NM_001290812)	promoter-TSS (NM_001290812)	-398	NM_001290811	Mm.384805	NM_029475	ENSMUSG00000027259	Adal	4930578F03Rik	adenosine deaminase-like	protein-coding	Adal	10475280	0.271867	0.0257197	24	7	0.0721885	8.07113	7.90525	8.0905	8.0778	7.9609	7.89691
72569	chr2-86	chr2	69647176	69647446	+	24.1	0.774	promoter-TSS (NM_028284)	promoter-TSS (NM_028284)	56	NM_028284	Mm.252136	NM_028284	ENSMUSG00000063145	Bbs5	1700049I01Rik|2700023J09Rik	Bardet-Biedl syndrome 5 (human)	protein-coding	Bbs5	10472549	0.271867	0.0257197	24	19	0.134265	63.8122	59.3609	57.2979	62.0513	67.7111	69.8511
67118	chr16-77	chr16	13671946	13672216	+	19	0.745	intron (NM_025976, intron 1 of 7)	CpG	223	NM_025976	Mm.223689	NM_025653	ENSMUSG00000022684	Bfar	3010001A07Rik|3110001I22Rik|AI666707|AW107665|Bar|Rnf47	bifunctional apoptosis regulator	protein-coding	Bfar///3110001I22Rik	10433660	0.271867	0.0257197	24	13.5	0.0978777	7.70714	7.69401	7.79271	7.85404	7.83622	7.81319
73230	chr9-186	chr9	23222740	23223010	+	18.2	0.688	promoter-TSS (NM_028472)	promoter-TSS (NM_028472)	-201	NM_028472	Mm.335020	NM_028472	ENSMUSG00000031963	Bmper	3110056H04Rik|CV-2|Crim3|Cv2	BMP-binding endothelial regulator	protein-coding	Bmper	10583870	0.271867	0.0257197	24	17.5	0.0740482	147.417	129.764	138.121	143.282	159.123	155.198
218294	chr13-56	chr13	64267182	64267452	+	23.3	0.786	non-coding (NR_045798, exon 3 of 3)	non-coding (NR_045798, exon 3 of 3)	7671	NM_172587	Mm.25335	NM_172587	ENSMUSG00000033102	Cdc14b	2810432N10Rik|A530086E13Rik|AA472821|CDC14B3|Cdc14B1	CDC14 cell division cycle 14B	protein-coding	Cdc14b	10410099	0.271867	0.0257197	24	13.5	0.0890247	173.621	153.404	169.563	187.322	178.521	163.602
12626	chr13-325	chr13	81783481	81783751	+	11.7	0.564	intron (NM_007684, intron 1 of 4)	CpG	324	NM_007684	Mm.12481	NM_007684	ENSMUSG00000021537	Cetn3	MmCEN3	centrin 3	protein-coding	Cetn3	10406426	0.271867	0.0257197	24	14.5	0.122273	232.315	210.698	234.664	254.001	251.803	238.052
231600	chr5-575	chr5	110135551	110135821	+	12.4	0.647	promoter-TSS (NM_172717)	promoter-TSS (NM_172717)	-144	NM_001289577	Mm.30264	NM_172717	ENSMUSG00000014668	Chfr	5730484M20Rik|C230082M18|RNF116	checkpoint with forkhead and ring finger domains	protein-coding	Chfr	10524105	0.271867	0.0257197	24	9	0.0839619	7.7296	7.87384	7.794	7.90483	7.75816	7.79306
12909	chr5-321	chr5	130029350	130029620	+	16.8	0.771	intron (NM_007761, intron 1 of 5)	CpG	179	NM_007761	Mm.18072	NM_007761	ENSMUSG00000025532	Crcp	AL022669	calcitonin gene-related peptide-receptor component protein	protein-coding	Crcp	10526113	0.271867	0.0257197	24	10.5	0.0691904	181.959	181.052	187.199	214.326	191.832	180.982
22592	chr1-365	chr1	44147836	44148106	+	16.8	0.587	5' UTR (NM_011729, exon 1 of 15)	5' UTR (NM_011729, exon 1 of 15)	227	NM_011729	Mm.2213	NM_011729	ENSMUSG00000026048	Ercc5	Xpg	excision repair cross-complementing rodent repair deficiency, complementation group 5	protein-coding	Ercc5	10345981	0.271867	0.0257197	24	18	0.11907	234.121	210.384	217.168	272.071	251.076	249.259
107371	chr19-137	chr19	37550496	37550766	+	16.8	0.595	intron (NM_175353, intron 1 of 21)	CpG	213	NM_175353	Mm.24865	NM_175353	ENSMUSG00000053799	Exoc6	4833405E05Rik|AW413330|C430002C19|Sec15|Sec15l1|hbd|msec15	exocyst complex component 6	protein-coding	Exoc6	10462822	0.271867	0.0257197	24	11.5	0.0743806	987.612	961.191	1071.79	1148.47	1077.22	1007.67
106581	chr17-123	chr17	26243828	26244098	+	20.4	0.636	intron (NM_001206335, intron 1 of 12)	CpG	279	NM_001206335	Mm.28844	NM_207217	ENSMUSG00000024187	Fam234a	Itfg3	family with sequence similarity 234, member A	protein-coding	Itfg3	10449266	0.271867	0.0257197	24	12	0.0617728	8.62546	8.67938	8.80175	8.88325	8.67047	8.67072
229593	chr3-583	chr3	95588520	95588790	+	11.7	0.552	promoter-TSS (NM_001177669)	promoter-TSS (NM_001177669)	-279	NM_001177670	Mm.245830	NM_146133	ENSMUSG00000046519	Golph3l	2010204I15Rik|AU015439|AW549227|C77637|Gpp34r	golgi phosphoprotein 3-like	protein-coding	Golph3l	10494288	0.271867	0.0257197	24	13	0.162656	8.71451	8.6878	8.72699	8.95249	8.9507	8.81395
70676	chr1-1296	chr1	44551848	44552118	+	10.2	0.581	intron (NM_028450, intron 1 of 10)	CpG	312	NM_028450	Mm.133132	NM_027506	ENSMUSG00000056870	Gulp1	3110030A04Rik|5730529O06Rik|CED-6|Ced6|GULP|Gulp-2	GULP, engulfment adaptor PTB domain containing 1	protein-coding	Gulp1	10346000	0.271867	0.0257197	24	7	0.143203	5.33697	5.78388	5.65226	5.65078	5.51154	5.58121
14792	chr6-695	chr6	124662741	124663011	+	10.9	0.655	promoter-TSS (NM_145130)	promoter-TSS (NM_145130)	-228	NM_145130	Mm.273915	NM_145130	ENSMUSG00000004270	Lpcat3	C3f|Grcc3f|Lpcat|Lpeat|Lplat5|Lpsat|Mboat5|Moact5|Oact5|PTG	lysophosphatidylcholine acyltransferase 3	protein-coding	Lpcat3	10541695	0.271867	0.0257197	24	8.5	0.103093	481.64	496.225	544.384	535.213	493.703	466.699
321000	chr3-261	chr3	106722079	106722349	+	16.8	0.684	intron (NM_028081, intron 1 of 2)	CpG	532	NM_001286685	Mm.259638	NM_028081	ENSMUSG00000056260	Lrif1	2010012G17Rik|4933421E11Rik|AI450568	ligand dependent nuclear receptor interacting factor 1	protein-coding	4933421E11Rik	10495173	0.271867	0.0257197	24	11	0.0657821	7.13433	7.23564	7.27331	7.3743	7.2788	7.15564
225028	chr17-780	chr17	80662492	80662762	+	11.7	0.727	intron (NM_001290345, intron 3 of 33)	intron (NM_001290345, intron 3 of 33)	65398	NM_001290345	Mm.311948	NM_001081357	ENSMUSG00000024242	Map4k3	4833416M01Rik|4833416M07Rik|9530052P13Rik|Glk|MAPKKKK3|MEKKK 3|MEKKK3|RAB8IPL1	mitogen-activated protein kinase kinase kinase kinase 3	protein-coding	Map4k3	10453178	0.271867	0.0257197	24	13	0.12042	8.40317	8.34264	8.56911	8.65092	8.55142	8.40257
26936	chr11-236	chr11	59662137	59662407	+	19	0.744	promoter-TSS (NM_201245)	promoter-TSS (NM_201245)	-223	NM_201245	Mm.2402	NM_012027	ENSMUSG00000005417	Mprip	9530046C02|AA536749|AI647711|C76423|RIP3|Rhoip3|mKIAA0864|p116Rip	myosin phosphatase Rho interacting protein	protein-coding	Mprip	10376534	0.271867	0.0257197	24	8	0.0509965	9.28548	9.28564	9.35787	9.32585	9.17314	9.25373
381038	chr16-381	chr16	20301985	20302255	+	11.7	0.72	intron (NM_001005767, intron 1 of 9)	CpG	242	NM_001005767	Mm.371737	NM_001005767	ENSMUSG00000033918	Parl	D16Ertd607e|PRO2207|PSARL1|PSENIP2|Psarl	presenilin associated, rhomboid-like	protein-coding	Parl	10438460	0.271867	0.0257197	24	12	0.0397394	406.587	414.955	432.78	450.181	452.414	423.594
208177	chr16-7	chr16	45796882	45797152	+	45.2	0.873	intron (NM_001252442, intron 5 of 18)	intron (NM_001252442, intron 5 of 18)	47361	NM_001252442	Mm.211477	NM_153412	ENSMUSG00000033149	Phldb2	AV253284|C820004H04Rik|LL5b|LL5beta	pleckstrin homology like domain, family B, member 2	protein-coding	Phldb2	10439710	0.271867	0.0257197	24	14	0.0599556	7.30315	7.26681	7.44327	7.49663	7.40788	7.44074
217864	chr12-445	chr12	111069276	111069546	+	12.4	0.957	intron (NM_198023, intron 2 of 11)	(TG)n|Simple_repeat|Simple_repeat	29613	NM_198023	Mm.23808	NM_198023	ENSMUSG00000037896	Rcor1	5730409O11|6720480E22Rik|AU042633|D12Wsu95e|Rocr1|mKIAA0071	REST corepressor 1	protein-coding	Rcor1	10398601	0.271867	0.0257197	24	6	0.0197848	284.261	269.531	288.205	277.946	245.894	264.354
100532	chr5-19	chr5	63957666	63957936	+	36.5	0.73	intron (NM_145923, intron 1 of 6)	intron (NM_145923, intron 1 of 6)	11096	NM_145923	Mm.243632	NM_145923	ENSMUSG00000047881	Rell1	AA536743	RELT-like 1	protein-coding	Rell1	10530130	0.271867	0.0257197	24	21	0.0469307	286.242	278.994	279.207	278.671	255.605	303.567
66922	chr7-398	chr7	114117620	114117890	+	15.3	0.641	promoter-TSS (NM_025846)	promoter-TSS (NM_025846)	26	NM_025846	Mm.276572	NM_025846	ENSMUSG00000055723	Rras2	2610016H24Rik|C86394|TC21	related RAS viral (r-ras) oncogene 2	protein-coding	Rras2	10567043	0.271867	0.0257197	24	6	0.137391	406.872	401.27	404.667	421.565	354.217	346.238
68750	chr13-59	chr13	37678272	37678542	+	24.1	0.75	Intergenic	Intergenic	-147631	NM_026830	Mm.491109	NM_026830	ENSMUSG00000039087	Rreb1	1110037N09Rik|AA414966|B930013M22Rik	ras responsive element binding protein 1	protein-coding	Rreb1	10404612	0.271867	0.0257197	24	7	0.0480762	388.772	408.349	411.86	401.668	380.676	406.587
20324	chr1-798	chr1	51289408	51289678	+	11.7	0.559	exon (NM_138741, exon 1 of 2)	exon (NM_138741, exon 1 of 2)	417	NM_138741	Mm.398690	NM_138741	ENSMUSG00000045954	Sdpr	-	serum deprivation response	protein-coding	Sdpr	10346164	0.271867	0.0257197	24	7	0.113194	190.243	229.971	228.008	230.994	191.974	190.603
72504	chr18-151	chr18	14783539	14783809	+	16	0.61	exon (NM_001100449, exon 1 of 15)	exon (NM_001100449, exon 1 of 15)	429	NM_001100449	Mm.312233	NM_001100449	ENSMUSG00000054321	Taf4b	105kDa|2610524B04Rik|4932409F03Rik|AW987595|TAFII-105|TAFII105|Taf2c2	TATA-box binding protein associated factor 4b	protein-coding	Taf4b	10454077	0.271867	0.0257197	24	14	0.0552604	117.139	102.805	111.22	145.064	117.241	117.124
100855	chr5-340	chr5	36530353	36530623	+	16	0.684	5' UTR (NM_001113364, exon 1 of 12)	5' UTR (NM_001113364, exon 1 of 12)	135	NM_001113364	Mm.486203	NM_133910	ENSMUSG00000029192	Tbc1d14	2810413P16Rik|AU043625|C86258|D5Ertd110e|mKIAA1322	TBC1 domain family, member 14	protein-coding	Tbc1d14	10529549	0.271867	0.0257197	24	7	0.134704	6.5539	6.8016	6.69075	6.61278	6.5503	6.50714
215243	chr1-116	chr1	193197903	193198173	+	24.8	0.643	5' UTR (NM_153137, exon 3 of 16)	5' UTR (NM_153137, exon 3 of 16)	3508	NM_153137	Mm.261259	NM_153137	ENSMUSG00000037318	Traf3ip3	6030423D04Rik|AI115021|T3jam	TRAF3 interacting protein 3	protein-coding	Traf3ip3	10361215	0.271867	0.0257197	24	1.5	0.064976	27.2781	35.9311	26.4521	25.8729	26.4958	27.0197
80914	chr1-689	chr1	167284643	167284913	+	11.7	0.6	exon (NM_030724, exon 1 of 7)	exon (NM_030724, exon 1 of 7)	349	NM_030724	Mm.280895	NM_030724	ENSMUSG00000026558	Uck2	AA407809|AI481316|AU018180|AU020720|TSA903|UK|UMK|Umpk	uridine-cytidine kinase 2	protein-coding	Uck2	10359851	0.271867	0.0257197	24	19.5	0.128234	556.86	467.541	457.856	501.109	502.73	537.932
216825	chr11-322	chr11	61174801	61175071	+	17.5	0.579	5' UTR (NM_001004143, exon 1 of 13)	5' UTR (NM_001004143, exon 1 of 13)	123	NM_001004143	Mm.30602	NM_001004143	ENSMUSG00000042506	Usp22	AI427806	ubiquitin specific peptidase 22	protein-coding	Usp22	10386636	0.271867	0.0257197	24	14	0.061787	230.38	253.247	266.097	280.96	287.144	256.686
245007	chr9-355	chr9	96719501	96719771	+	16	0.638	intron (NM_175537, intron 1 of 2)	CpG	12039	NM_175537	Mm.485954	NM_175537	ENSMUSG00000040433	Zbtb38	A930014K01Rik|CIBZ	zinc finger and BTB domain containing 38	protein-coding	Zbtb38	10595831	0.271867	0.0257197	24	12	0.0461529	545.154	543.471	564.082	595.187	541.771	539.13
56220	chr12-406	chr12	115978451	115978721	+	26.2	0.973	Intergenic	L1_Mus2|LINE|L1	-69138	NM_019565	Mm.254997	NM_019565	ENSMUSG00000042063	Zfp386	Kzf1|mKIAA4205	zinc finger protein 386 (Kruppel-like)	protein-coding	Zfp386	10399038	0.271867	0.0257197	24	11	0.0570352	358.013	368.267	366.376	425.525	402.85	378.539
240067	chr17-230	chr17	32993200	32993470	+	17.5	0.771	intron (NM_001045559, intron 1 of 3)	intron (NM_001045559, intron 1 of 3)	196	NM_001045559	Mm.246667	NM_199020	ENSMUSG00000053390	Zfp952	BC057593|C920016K16Rik	zinc finger protein 952	protein-coding	Zfp952	10443918	0.271867	0.0257197	24	14	0.0801152	5.69417	5.6984	5.68708	5.91914	5.79411	5.72136
