# Supplementary material for: MYOD1 functions as a clock amplifier as well as a critical co-factor for downstream circadian gene expression in muscle
Source: eLife. 2019 Feb 21;8:e43017. doi: 10.7554/eLife.43017 (PMC6398978; doi:10.7554/eLife.43017)
Supplement: Supplementary file 4. [file elife-43017-supp4.xlsx]

## Sheet: MYOD1_Bound_Circ_genes
gene	Circadian	ID	Probe Set ID	Gene Symbol	CE26-30_092309.mas5-Signal	CE38-42_092309.mas5-Signal	CE average	WT26-30_092309.mas5-Signal	WT38-42_092309.mas5-Signal	CE/WT 26	CE/WT 38	Average	WT average	CoreEnhance/Wildtype	Representative Public ID	Gene Title	Gene Ontology Biological Process	Gene Ontology Cellular Component	Gene Ontology Molecular Function	Pathway
Rhobtb3	0.00117065	10410695	1453227	Rhobtb3	5.77555	19.0859	12.4307	123.811	195.263	0.0466482	0.0977445	0.0721964	159.537	0.0779175	BG801497	Rho-related BTB domain containing 3	---	---	0005515 // protein binding // inferred from electronic annotation	---
Ppp1r3c	1.49e-06	10467206	1425631	Ppp1r3c	117.257	1101.4	609.329	2098.25	8866.92	0.0558832	0.124215	0.0900489	5482.58	0.111139	U89924	protein phosphatase 1, regulatory (inhibitor) subunit 3C	0005975 // carbohydrate metabolic process // inferred from electronic annotation /// 0005977 // glycogen metabolic process // inferred from direct assay /// 0005977 // glycogen metabolic process // inferred from electronic annotation /// 0005978 // glycogen biosynthetic process // inferred from mutant phenotype /// 0006605 // protein targeting // traceable author statement	---	0005515 // protein binding // traceable author statement	Circadian_Exercise // GenMAPP
Met	0.00758419	10536505	1422990	Met	4.68504	38.596	21.6405	56.0791	278.289	0.0835433	0.138691	0.111117	167.184	0.129441	NM_008591	met proto-oncogene	0000187 // activation of MAPK activity // inferred from physical interaction /// 0001764 // neuron migration // inferred from electronic annotation /// 0006468 // protein amino acid phosphorylation // inferred from electronic annotation /// 0007275 // multicellular organismal development // inferred from electronic annotation /// 0007420 // brain development // inferred from mutant phenotype /// …	0005624 // membrane fraction // inferred from direct assay /// 0009925 // basal plasma membrane // not recorded /// 0016020 // membrane // inferred from electronic annotation /// 0016021 // integral to membrane // inferred from electronic annotation /// 0019861 // flagellum // inferred from electronic annotation	0000166 // nucleotide binding // inferred from electronic annotation /// 0004672 // protein kinase activity // inferred from electronic annotation /// 0004713 // protein tyrosine kinase activity // inferred from electronic annotation /// 0004714 // transmembrane receptor protein tyrosine kinase activity // inferred from electronic annotation /// 0004872 // receptor activity // inferred from elect…	---
Map3k4	0.0142182	10447742	1450253	Map3k4	4.41708	43.3602	23.8886	71.0473	225.004	0.062171	0.192709	0.12744	148.026	0.161382	U11548	mitogen-activated protein kinase kinase kinase 4	0006468 // protein amino acid phosphorylation // inferred from electronic annotation	0005737 // cytoplasm // inferred from electronic annotation	0000166 // nucleotide binding // inferred from electronic annotation /// 0000287 // magnesium ion binding // inferred from electronic annotation /// 0004672 // protein kinase activity // inferred from electronic annotation /// 0004674 // protein serine/threonine kinase activity // inferred from electronic annotation /// 0004709 // MAP kinase kinase kinase activity // inferred from electronic anno…	G13_Signaling_Pathway // GenMAPP
Tbc1d1	0.000536109	10522024	1419446	Tbc1d1	10.8957	19.9941	15.4449	75.9919	114.695	0.14338	0.174324	0.158852	95.3433	0.161992	BB501891	TBC1 domain family, member 1	0032313 // regulation of Rab GTPase activity // inferred from electronic annotation	0005622 // intracellular // inferred from electronic annotation /// 0005634 // nucleus // inferred from electronic annotation	0005096 // GTPase activator activity // inferred from electronic annotation /// 0005097 // Rab GTPase activator activity // inferred from electronic annotation	---
Slc8a1	9.96e-07	10453233	1425817	Slc8a1	4.45933	9.80014	7.12973	27.0835	58.8861	0.164651	0.166425	0.165538	42.9848	0.165866	U70033	solute carrier family 8 (sodium/calcium exchanger), member 1	0002026 // regulation of the force of heart contraction // inferred from mutant phenotype /// 0002028 // regulation of sodium ion transport // inferred from electronic annotation /// 0006810 // transport // inferred from electronic annotation /// 0006811 // ion transport // inferred from electronic annotation /// 0006814 // sodium ion transport // inferred from direct assay /// 0006814 // sodium …	0005886 // plasma membrane // inferred from direct assay /// 0005886 // plasma membrane // inferred from electronic annotation /// 0016020 // membrane // inferred from electronic annotation /// 0016021 // integral to membrane // traceable author statement /// 0016021 // integral to membrane // inferred from electronic annotation /// 0030315 // T-tubule // inferred from direct assay /// 0042383 //…	0005432 // calcium:sodium antiporter activity // inferred from direct assay /// 0005432 // calcium:sodium antiporter activity // inferred from electronic annotation /// 0005509 // calcium ion binding // inferred from electronic annotation /// 0005515 // protein binding // inferred from physical interaction /// 0005516 // calmodulin binding // inferred from electronic annotation /// 0015297 // ant…	Calcium_regulation_in_cardiac_cells // GenMAPP /// Smooth_muscle_contraction // GenMAPP
Pde2a	0.00150322	10555510	1452202	Pde2a	21.6147	30.2269	25.9208	101.435	222.973	0.213089	0.135563	0.174326	162.204	0.159804	BG069616	phosphodiesterase 2A, cGMP-stimulated	0007165 // signal transduction // inferred from electronic annotation	0016020 // membrane // inferred from electronic annotation	0003824 // catalytic activity // inferred from electronic annotation /// 0004114 // 3',5'-cyclic-nucleotide phosphodiesterase activity // inferred from electronic annotation /// 0016787 // hydrolase activity // inferred from electronic annotation	---
Tmcc3	0.0142182	10365891	1451794	Tmcc3	33.431	64.8954	49.1632	134.079	520.037	0.249338	0.12479	0.187064	327.058	0.15032	BC026867	transmembrane and coiled coil domains 3	---	0016020 // membrane // inferred from electronic annotation /// 0016021 // integral to membrane // inferred from electronic annotation	---	---
Atg13	0.0142182	10485048	1423793	D2Ertd391e	21.5534	112.281	66.9171	259.236	376.851	0.0831419	0.297945	0.190543	318.044	0.210402	BM231455	DNA segment, Chr 2, ERATO Doi 391, expressed	---	---	---	---
Itga4	0.000536109	10473125	1421194	Cerkl /// Itga4	9.18251	29.0873	19.1349	68.4247	116.963	0.134199	0.248688	0.191444	92.6937	0.206431	NM_010576	ceramide kinase-like /// integrin alpha 4	0001974 // blood vessel remodeling // inferred from mutant phenotype /// 0007155 // cell adhesion // inferred from mutant phenotype /// 0007155 // cell adhesion // inferred from electronic annotation /// 0007157 // heterophilic cell adhesion // inferred from mutant phenotype /// 0007159 // leukocyte adhesion // inferred from mutant phenotype /// 0007159 // leukocyte adhesion // inferred from elec…	0008305 // integrin complex // inferred from electronic annotation /// 0009897 // external side of plasma membrane // inferred from direct assay /// 0009986 // cell surface // inferred from electronic annotation /// 0016020 // membrane // inferred from electronic annotation /// 0016021 // integral to membrane // inferred from electronic annotation	0001968 // fibronectin binding // inferred from mutant phenotype /// 0004872 // receptor activity // inferred from electronic annotation /// 0005509 // calcium ion binding // inferred from electronic annotation /// 0005515 // protein binding // inferred from electronic annotation /// 0016301 // kinase activity // inferred from electronic annotation /// 0042802 // identical protein binding // infe…	Integrin-mediated_cell_adhesion_KEGG // GenMAPP
Golph3l	0.0257197	10494288	1451619	Golph3l	12.9595	86.2786	49.619	143.128	246.033	0.0905444	0.350679	0.220612	194.581	0.255005	BC027194	golgi phosphoprotein 3-like	---	0005737 // cytoplasm // inferred from electronic annotation /// 0005794 // Golgi apparatus // not recorded /// 0005794 // Golgi apparatus // inferred from electronic annotation /// 0016020 // membrane // inferred from electronic annotation	---	---
Tnfrsf21	0.00609984	10445241	1422740	Tnfrsf21	35.2472	139.181	87.2139	306.98	391.082	0.114819	0.355886	0.235353	349.031	0.249874	BG972377	tumor necrosis factor receptor superfamily, member 21	0006915 // apoptosis // inferred from electronic annotation /// 0007165 // signal transduction // inferred from electronic annotation	0016020 // membrane // inferred from electronic annotation /// 0016021 // integral to membrane // inferred from electronic annotation	0004872 // receptor activity // inferred from electronic annotation /// 0005515 // protein binding // inferred from electronic annotation	Apoptosis // GenMAPP
Dgkh	0.00939007	10421774	1457213	Dgkh	15.1371	21.2263	18.1817	70.6191	79.284	0.214349	0.267726	0.241037	74.9515	0.24258	AV276089	diacylglycerol kinase, eta	0007205 // activation of protein kinase C activity // inferred from electronic annotation /// 0007242 // intracellular signaling cascade // inferred from electronic annotation /// 0046339 // diacylglycerol metabolic process // not recorded	0005737 // cytoplasm // not recorded /// 0005768 // endosome // not recorded	0004143 // diacylglycerol kinase activity // not recorded /// 0004143 // diacylglycerol kinase activity // inferred from electronic annotation /// 0042803 // protein homodimerization activity // not recorded	---
Tgfb3	0.011578	10401673	1417455	Tgfb3	87.8567	99.0754	93.4661	254.533	693.849	0.345168	0.142791	0.243979	474.191	0.197106	BC014690	transforming growth factor, beta 3	0000187 // activation of MAPK activity // inferred from electronic annotation /// 0001666 // response to hypoxia // inferred from electronic annotation /// 0001701 // in utero embryonic development // inferred from mutant phenotype /// 0006917 // induction of apoptosis // inferred from mutant phenotype /// 0007184 // SMAD protein nuclear translocation // inferred from electronic annotation /// 00…	0005576 // extracellular region // inferred from electronic annotation /// 0005615 // extracellular space // inferred from electronic annotation /// 0005634 // nucleus // inferred from electronic annotation /// 0005737 // cytoplasm // inferred from electronic annotation /// 0030141 // secretory granule // inferred from electronic annotation /// 0030315 // T-tubule // inferred from electronic anno…	0005160 // transforming growth factor beta receptor binding // inferred from electronic annotation /// 0005515 // protein binding // inferred from electronic annotation /// 0008083 // growth factor activity // inferred from electronic annotation	---
Usp22	0.0257197	10386636	1456043	Usp22	3.85051	2.7393	3.29491	10	23.1753	0.385051	0.118199	0.251625	16.5876	0.198636	BE951601	ubiquitin specific peptidase 22	0006511 // ubiquitin-dependent protein catabolic process // inferred by curator /// 0006511 // ubiquitin-dependent protein catabolic process // inferred from electronic annotation /// 0016578 // histone deubiquitination // inferred from electronic annotation /// 0016579 // protein deubiquitination // inferred from direct assay /// 0045931 // positive regulation of mitotic cell cycle // inferred f…	0000124 // SAGA complex // inferred from electronic annotation /// 0005634 // nucleus // inferred from electronic annotation	0004221 // ubiquitin thiolesterase activity // inferred from electronic annotation /// 0004843 // ubiquitin-specific protease activity // inferred from direct assay /// 0008233 // peptidase activity // inferred from electronic annotation /// 0008234 // cysteine-type peptidase activity // inferred from electronic annotation /// 0008270 // zinc ion binding // inferred from electronic annotation ///…	---
Klhl8	0.00023376	10531899	1433526	Klhl8	93.0831	100.214	96.6483	267.808	538.077	0.347574	0.186244	0.266909	402.943	0.239856	BM942651	kelch-like 8 (Drosophila)	---	---	0005515 // protein binding // inferred from electronic annotation	---
Atoh8	0.00609984	10545372	1426418	Atoh8	5.94177	21.501	13.7214	15.1524	146.25	0.392134	0.147015	0.269574	80.7014	0.170026	AK016909	atonal homolog 8 (Drosophila)	0006350 // transcription // inferred from electronic annotation /// 0006355 // regulation of transcription, DNA-dependent // inferred from electronic annotation /// 0007275 // multicellular organismal development // inferred from electronic annotation /// 0007399 // nervous system development // inferred from electronic annotation /// 0030154 // cell differentiation // inferred from electronic an…	0005634 // nucleus // inferred from electronic annotation	0003677 // DNA binding // inferred from electronic annotation /// 0030528 // transcription regulator activity // inferred from electronic annotation	---
Vegfa	0.00309146	10451198	1451959	Vegfa	29.7782	28.8962	29.3372	83.1419	157.096	0.358161	0.18394	0.27105	120.119	0.244235	U50279	vascular endothelial growth factor A	0001525 // angiogenesis // inferred from direct assay /// 0001525 // angiogenesis // inferred from genetic interaction /// 0001525 // angiogenesis // inferred from mutant phenotype /// 0001525 // angiogenesis // inferred from electronic annotation /// 0001541 // ovarian follicle development // inferred from mutant phenotype /// 0001568 // blood vessel development // inferred from mutant phenotype…	0005576 // extracellular region // inferred from electronic annotation /// 0005615 // extracellular space // inferred from direct assay /// 0005737 // cytoplasm // inferred from direct assay /// 0005886 // plasma membrane // inferred from electronic annotation /// 0016020 // membrane // inferred from electronic annotation	0005515 // protein binding // inferred from physical interaction /// 0008083 // growth factor activity // inferred from electronic annotation /// 0008201 // heparin binding // inferred from electronic annotation	---
Asb2	1.6e-08	10402325	1428444	Asb2	1740.85	5766.98	3753.91	11403.6	13603.1	0.152658	0.423944	0.288301	12503.4	0.300232	AK003566	ankyrin repeat and SOCS box-containing 2	0006511 // ubiquitin-dependent protein catabolic process // inferred from electronic annotation /// 0007242 // intracellular signaling cascade // inferred from electronic annotation	---	---	---
Wdr53	0.0173912	10435015	1428839	Wdr53	57.7403	93.466	75.6032	233.971	275.739	0.246784	0.338966	0.292875	254.855	0.296652	AK005105	WD repeat domain 53	---	---	---	---
Arhgef1	0.00192078	10551030	1421164	Arhgef1	64.3071	68.7694	66.5383	275.297	190.825	0.233592	0.36038	0.296986	233.061	0.285497	NM_008488	Rho guanine nucleotide exchange factor (GEF) 1	0007242 // intracellular signaling cascade // inferred from electronic annotation /// 0035023 // regulation of Rho protein signal transduction // inferred from electronic annotation	0005622 // intracellular // inferred from electronic annotation /// 0005737 // cytoplasm // inferred from electronic annotation /// 0016020 // membrane // inferred from electronic annotation	0005085 // guanyl-nucleotide exchange factor activity // inferred from electronic annotation /// 0005089 // Rho guanyl-nucleotide exchange factor activity // inferred from electronic annotation /// 0005096 // GTPase activator activity // inferred from electronic annotation /// 0005515 // protein binding // inferred from physical interaction	G13_Signaling_Pathway // GenMAPP /// G_Protein_Signaling // GenMAPP
Rnpep	0.0173912	10358038	1451243	Rnpep	19.0773	112.254	65.6659	155.949	225.167	0.122331	0.498539	0.310435	190.558	0.344598	BC019200	arginyl aminopeptidase (aminopeptidase B)	0006508 // proteolysis // inferred from electronic annotation /// 0019370 // leukotriene biosynthetic process // inferred from electronic annotation	0005576 // extracellular region // inferred from electronic annotation /// 0005576 // extracellular region // inferred from sequence or structural similarity /// 0005615 // extracellular space // inferred from electronic annotation /// 0005886 // plasma membrane // inferred from sequence or structural similarity	0004177 // aminopeptidase activity // inferred from electronic annotation /// 0004177 // aminopeptidase activity // inferred from sequence or structural similarity /// 0005488 // binding // inferred from electronic annotation /// 0008233 // peptidase activity // inferred from electronic annotation /// 0008237 // metallopeptidase activity // inferred from electronic annotation /// 0008270 // zinc …	mRNA_processing_binding_Reactome // GenMAPP
Pecam1	0.000130539	10392221	1421287	Pecam1	156.178	449.739	302.958	740.466	1093.42	0.210918	0.411312	0.311115	916.945	0.330399	NM_008816	platelet/endothelial cell adhesion molecule 1	0007155 // cell adhesion // inferred from electronic annotation /// 0007266 // Rho protein signal transduction // inferred from mutant phenotype /// 0030334 // regulation of cell migration // inferred from mutant phenotype /// 0042060 // wound healing // inferred from mutant phenotype	0005886 // plasma membrane // inferred from direct assay /// 0016020 // membrane // inferred from electronic annotation /// 0016021 // integral to membrane // inferred from electronic annotation /// 0045121 // membrane raft // inferred from direct assay	0005515 // protein binding // inferred from electronic annotation	---
Mob1a	0.00244254	10539421	1424483	Mobkl1b	187.189	297.294	242.241	666.27	846.777	0.28095	0.351088	0.316019	756.523	0.320203	AV226922	MOB1, Mps One Binder kinase activator-like 1B (yeast)	---	---	0005515 // protein binding // inferred from electronic annotation /// 0008270 // zinc ion binding // inferred from electronic annotation /// 0046872 // metal ion binding // inferred from electronic annotation	---
Cmip	0.00389482	10575777	1427980	4933407C03Rik	75.2848	23.9472	49.616	176.951	102.629	0.425456	0.233339	0.329397	139.79	0.354933	BB324697	RIKEN cDNA 4933407C03 gene	---	0005634 // nucleus // inferred from electronic annotation /// 0005737 // cytoplasm // inferred from electronic annotation	---	---
Arsb	0.00192078	10406663	1429190	Arsb	9.79215	2.16352	5.97784	19.2538	13.8831	0.508584	0.155839	0.332211	16.5684	0.360797	BI440651	arylsulfatase B	0008152 // metabolic process // inferred from electronic annotation	0005764 // lysosome // inferred from electronic annotation	0003824 // catalytic activity // inferred from electronic annotation /// 0003943 // N-acetylgalactosamine-4-sulfatase activity // inferred from electronic annotation /// 0004065 // arylsulfatase activity // inferred from direct assay /// 0005509 // calcium ion binding // inferred from electronic annotation /// 0008484 // sulfuric ester hydrolase activity // inferred from electronic annotation ///…	---
Col4a2	7.11e-05	10570068	1424051	Col4a2	811.042	512.188	661.615	2040.34	1895.32	0.397504	0.270238	0.333871	1967.83	0.336215	BC013560	collagen, type IV, alpha 2	0016525 // negative regulation of angiogenesis // inferred from sequence or structural similarity	0005576 // extracellular region // inferred from electronic annotation /// 0005578 // proteinaceous extracellular matrix // inferred from electronic annotation /// 0005581 // collagen // inferred from electronic annotation /// 0005587 // collagen type IV // inferred from direct assay /// 0005604 // basement membrane // inferred from direct assay /// 0005604 // basement membrane // inferred from e…	0005201 // extracellular matrix structural constituent // inferred from electronic annotation /// 0005488 // binding // inferred from electronic annotation	---
Pdxk	0.00040883	10370497	1427930	Pdxk	3.83139	41.3548	22.5931	18.8851	84.9529	0.202879	0.486796	0.344838	51.919	0.43516	BG063905	pyridoxal (pyridoxine, vitamin B6) kinase	0008615 // pyridoxine biosynthetic process // inferred from electronic annotation	0005737 // cytoplasm // inferred from electronic annotation	0000166 // nucleotide binding // inferred from electronic annotation /// 0005524 // ATP binding // inferred from electronic annotation /// 0008270 // zinc ion binding // inferred from electronic annotation /// 0008478 // pyridoxal kinase activity // inferred from electronic annotation /// 0016301 // kinase activity // inferred from electronic annotation /// 0016740 // transferase activity // infe…	---
Gprc5c	0.00848713	10382435	1424450	Gprc5c	22.2243	217.367	119.796	213.698	360.653	0.103998	0.602703	0.353351	287.176	0.417151	BC008228	G protein-coupled receptor, family C, group 5, member C	0007165 // signal transduction // inferred from electronic annotation /// 0007186 // G-protein coupled receptor protein signaling pathway // inferred from electronic annotation /// 0007601 // visual perception // inferred from electronic annotation	0005739 // mitochondrion // inferred from direct assay /// 0005886 // plasma membrane // inferred from electronic annotation /// 0016020 // membrane // inferred from electronic annotation /// 0016021 // integral to membrane // inferred from electronic annotation	0004871 // signal transducer activity // inferred from electronic annotation /// 0004872 // receptor activity // inferred from electronic annotation /// 0004930 // G-protein coupled receptor activity // inferred from electronic annotation /// 0005118 // sevenless binding // inferred from electronic annotation /// 0005515 // protein binding // inferred from electronic annotation	---
Adamts10	0.00192078	10443949	1427139	Adamts10	69.7846	13.2787	41.5316	113.543	141.465	0.61461	0.0938649	0.354238	127.504	0.325728	BG064835	a disintegrin-like and metallopeptidase (reprolysin type) with thrombospondin type 1 motif, 10	0006508 // proteolysis // inferred from electronic annotation	0005576 // extracellular region // inferred from electronic annotation /// 0005578 // proteinaceous extracellular matrix // inferred from electronic annotation /// 0031012 // extracellular matrix // inferred from electronic annotation	0004222 // metalloendopeptidase activity // inferred from electronic annotation /// 0008233 // peptidase activity // inferred from electronic annotation /// 0008237 // metallopeptidase activity // inferred from electronic annotation /// 0008270 // zinc ion binding // inferred from electronic annotation /// 0016787 // hydrolase activity // inferred from electronic annotation /// 0046872 // metal i…	---
Akap8l	0.0211898	10449854	1417734	Akap8l	123.932	183.108	153.52	353.661	498.772	0.350426	0.367118	0.358772	426.216	0.360193	NM_017476	A kinase (PRKA) anchor protein 8-like	---	0005622 // intracellular // inferred from electronic annotation /// 0005634 // nucleus // inferred from electronic annotation /// 0005694 // chromosome // inferred from electronic annotation /// 0005737 // cytoplasm // inferred from electronic annotation /// 0016363 // nuclear matrix // inferred from electronic annotation	0003677 // DNA binding // inferred from electronic annotation /// 0005515 // protein binding // inferred from electronic annotation /// 0008270 // zinc ion binding // inferred from electronic annotation /// 0016301 // kinase activity // inferred from electronic annotation /// 0046872 // metal ion binding // inferred from electronic annotation	---
Pnkd	0.00609984	10347310	1418746	Pnkd	49.4147	72.4921	60.9534	131.399	210.302	0.376066	0.344704	0.360385	170.851	0.356764	NM_019999	paroxysmal nonkinesiogenic dyskinesia	---	0005634 // nucleus // inferred from electronic annotation /// 0005737 // cytoplasm // inferred from electronic annotation /// 0005739 // mitochondrion // inferred from electronic annotation /// 0016020 // membrane // inferred from electronic annotation	0008270 // zinc ion binding // inferred from electronic annotation /// 0016787 // hydrolase activity // inferred from electronic annotation /// 0046872 // metal ion binding // inferred from electronic annotation	---
Dhx8	0.0211898	10381477	1426629	Dhx8	104.565	183.669	144.117	301.568	490.615	0.346738	0.374364	0.360551	396.092	0.363847	BB667274	DEAH (Asp-Glu-Ala-His) box polypeptide 8	0006397 // mRNA processing // inferred from electronic annotation /// 0008380 // RNA splicing // inferred from electronic annotation	0005634 // nucleus // inferred from electronic annotation /// 0005681 // spliceosome // inferred from electronic annotation	0000166 // nucleotide binding // inferred from electronic annotation /// 0003676 // nucleic acid binding // inferred from electronic annotation /// 0003723 // RNA binding // inferred from electronic annotation /// 0004386 // helicase activity // inferred from electronic annotation /// 0005524 // ATP binding // inferred from electronic annotation /// 0008026 // ATP-dependent helicase activity // i…	mRNA_processing_binding_Reactome // GenMAPP
Rexo4	0.000699194	10481155	1434114	Rexo4	48.9632	88.4452	68.7042	123.33	268.654	0.397009	0.329217	0.363113	195.992	0.350546	BG076284	REX4, RNA exonuclease 4 homolog (S. cerevisiae)	---	0005622 // intracellular // inferred from electronic annotation /// 0005634 // nucleus // inferred from electronic annotation	0003676 // nucleic acid binding // inferred from electronic annotation /// 0004518 // nuclease activity // inferred from electronic annotation /// 0004527 // exonuclease activity // inferred from electronic annotation /// 0016787 // hydrolase activity // inferred from electronic annotation	---
Lpcat3	0.0257197	10541695	1423960	Lpcat3	226.753	385.02	305.887	676.933	968.761	0.334971	0.397435	0.366203	822.847	0.371742	BC006753	lysophosphatidylcholine acyltransferase 3	0008654 // phospholipid biosynthetic process // inferred from electronic annotation	0005783 // endoplasmic reticulum // inferred from electronic annotation /// 0005789 // endoplasmic reticulum membrane // inferred from electronic annotation /// 0016020 // membrane // inferred from electronic annotation /// 0016021 // integral to membrane // inferred from electronic annotation	0008415 // acyltransferase activity // inferred from electronic annotation /// 0016740 // transferase activity // inferred from electronic annotation /// 0047184 // 1-acylglycerophosphocholine O-acyltransferase activity // inferred from electronic annotation	---
Ccdc57	0.00150322	10394018	1429852	Ccdc57	39.5344	8.04952	23.7919	67.3049	52.4313	0.587392	0.153525	0.370458	59.8681	0.397406	AK017054	coiled-coil domain containing 57	---	---	---	---
Plxnd1	0.011578	10547100	1451475	Plxnd1	248.494	245.179	246.837	660.575	637.9	0.376179	0.384353	0.380266	649.238	0.380194	BC019530	plexin D1	0001569 // patterning of blood vessels // inferred from mutant phenotype /// 0007165 // signal transduction // inferred from electronic annotation /// 0007275 // multicellular organismal development // inferred from electronic annotation	0005622 // intracellular // inferred from electronic annotation /// 0005886 // plasma membrane // inferred by curator /// 0016020 // membrane // inferred from electronic annotation /// 0016021 // integral to membrane // inferred from electronic annotation	0004872 // receptor activity // inferred from electronic annotation /// 0005515 // protein binding // inferred from physical interaction /// 0017154 // semaphorin receptor activity // inferred from physical interaction	---
Mlycd	0.00389482	10575867	1449964	Mlycd	350.304	731.031	540.668	1146.87	1593.73	0.305445	0.458692	0.382068	1370.3	0.394562	NM_019966	malonyl-CoA decarboxylase	0006085 // acetyl-CoA biosynthetic process // inferred from electronic annotation /// 0006633 // fatty acid biosynthetic process // inferred from electronic annotation /// 0008610 // lipid biosynthetic process // inferred from electronic annotation /// 0031998 // regulation of fatty acid beta-oxidation // inferred from electronic annotation	0005737 // cytoplasm // inferred from electronic annotation /// 0005739 // mitochondrion // inferred from direct assay /// 0005739 // mitochondrion // inferred from electronic annotation /// 0005777 // peroxisome // inferred from electronic annotation /// 0005829 // cytosol // inferred from electronic annotation	0016829 // lyase activity // inferred from electronic annotation /// 0016831 // carboxy-lyase activity // inferred from electronic annotation /// 0050080 // malonyl-CoA decarboxylase activity // inferred from electronic annotation	---
Gab1	0.00389482	10579925	1448814	Gab1	82.2112	160.45	121.331	243.159	376.13	0.338096	0.426583	0.382339	309.644	0.391839	NM_021356	growth factor receptor bound protein 2-associated protein 1	0000187 // activation of MAPK activity // inferred from direct assay /// 0006979 // response to oxidative stress // inferred from direct assay /// 0007165 // signal transduction // inferred from direct assay /// 0007257 // activation of JNK activity // inferred from mutant phenotype /// 0030334 // regulation of cell migration // inferred from genetic interaction	0005737 // cytoplasm // inferred from direct assay	0004871 // signal transducer activity // inferred from direct assay /// 0004872 // receptor activity // inferred from electronic annotation /// 0005515 // protein binding // inferred from physical interaction	---
Tef	9.96e-07	10425601	1424175	Tef	1097.06	2644.57	1870.81	3467.51	5711.23	0.316382	0.463047	0.389715	4589.37	0.407641	BC017689	thyrotroph embryonic factor	0006350 // transcription // inferred from electronic annotation /// 0006355 // regulation of transcription, DNA-dependent // inferred from electronic annotation /// 0045944 // positive regulation of transcription from RNA polymerase II promoter // inferred from direct assay /// 0048511 // rhythmic process // inferred from electronic annotation	0005634 // nucleus // inferred by curator /// 0005634 // nucleus // inferred from electronic annotation	0003677 // DNA binding // inferred from electronic annotation /// 0003690 // double-stranded DNA binding // inferred from direct assay /// 0003700 // transcription factor activity // inferred from electronic annotation /// 0005515 // protein binding // inferred from physical interaction /// 0016563 // transcription activator activity // inferred from direct assay /// 0043565 // sequence-specific …	---
Rnf122	9.66e-05	10571214	1454857	Rnf122	20.3782	22.1329	21.2555	34.698	113.253	0.587301	0.195428	0.391365	73.9756	0.287332	AW551457	ring finger protein 122	---	0005783 // endoplasmic reticulum // inferred from electronic annotation /// 0005794 // Golgi apparatus // inferred from electronic annotation /// 0016020 // membrane // inferred from electronic annotation /// 0016021 // integral to membrane // inferred from electronic annotation	0005515 // protein binding // inferred from electronic annotation /// 0008270 // zinc ion binding // inferred from electronic annotation /// 0046872 // metal ion binding // inferred from electronic annotation	---
Rcor1	0.0257197	10398601	1437545	Rcor1	57.6398	110.808	84.2237	191.787	225.718	0.30054	0.490911	0.395726	208.753	0.403461	BM194994	REST corepressor 1	0006350 // transcription // inferred from electronic annotation /// 0006355 // regulation of transcription, DNA-dependent // inferred from electronic annotation /// 0016568 // chromatin modification // inferred from electronic annotation	0005634 // nucleus // inferred from electronic annotation	0003677 // DNA binding // inferred from electronic annotation	---
Cd93	0.00192078	10488382	1449521	Cd93	36.8119	14.8564	25.8341	68.7366	56.6643	0.53555	0.262182	0.398866	62.7004	0.412024	BB039247	CD93 antigen	0007155 // cell adhesion // inferred from electronic annotation /// 0016337 // cell-cell adhesion // inferred from sequence or structural similarity /// 0016337 // cell-cell adhesion // inferred from electronic annotation	0005886 // plasma membrane // inferred from direct assay /// 0016020 // membrane // inferred from electronic annotation /// 0016021 // integral to membrane // inferred from electronic annotation /// 0016023 // cytoplasmic membrane-bounded vesicle // inferred from direct assay	0001849 // complement component C1q binding // inferred from electronic annotation /// 0004872 // receptor activity // inferred from electronic annotation /// 0005488 // binding // inferred from electronic annotation /// 0005509 // calcium ion binding // inferred from electronic annotation /// 0005515 // protein binding // inferred from electronic annotation /// 0005529 // sugar binding // inferr…	---
Arl6ip1	0.000699194	10567219	1451131	Arl6ip1	148.242	170.558	159.4	332.896	476.237	0.44531	0.358136	0.401723	404.567	0.394001	AF133669	ADP-ribosylation factor-like 6 interacting protein 1	0006613 // cotranslational protein targeting to membrane // inferred from physical interaction	0005737 // cytoplasm // inferred from direct assay /// 0005783 // endoplasmic reticulum // inferred from electronic annotation /// 0005784 // translocon complex // inferred from physical interaction /// 0005829 // cytosol // inferred from direct assay /// 0016020 // membrane // inferred from electronic annotation /// 0016021 // integral to membrane // inferred from direct assay /// 0016021 // int…	0005515 // protein binding // inferred from physical interaction	---
Stk4	0.011578	10478447	1421107	Stk4	19.107	56.913	38.01	102.944	87.923	0.185606	0.647305	0.416455	95.4333	0.398288	NM_021420	serine/threonine kinase 4	0000902 // cell morphogenesis // not recorded /// 0000902 // cell morphogenesis // inferred from electronic annotation /// 0006468 // protein amino acid phosphorylation // not recorded /// 0006468 // protein amino acid phosphorylation // inferred from electronic annotation /// 0006915 // apoptosis // inferred from electronic annotation /// 0007165 // signal transduction // inferred from electroni…	0005634 // nucleus // inferred from direct assay /// 0005634 // nucleus // inferred from electronic annotation /// 0005737 // cytoplasm // inferred from direct assay /// 0005737 // cytoplasm // inferred from electronic annotation	0000166 // nucleotide binding // inferred from electronic annotation /// 0000287 // magnesium ion binding // inferred from electronic annotation /// 0004672 // protein kinase activity // inferred from electronic annotation /// 0004674 // protein serine/threonine kinase activity // not recorded /// 0004674 // protein serine/threonine kinase activity // inferred from electronic annotation /// 00055…	---
Ino80	0.00031003	10486203	1448965	Ino80	37.9812	4.45817	21.2197	51.2715	45.7244	0.740784	0.097501	0.419143	48.498	0.437537	BM238259	INO80 homolog (S. cerevisiae)	0006338 // chromatin remodeling // inferred from electronic annotation /// 0006338 // chromatin remodeling // inferred from sequence or structural similarity	0005634 // nucleus // inferred from electronic annotation /// 0005634 // nucleus // inferred from sequence or structural similarity	0000166 // nucleotide binding // inferred from electronic annotation /// 0003676 // nucleic acid binding // inferred from electronic annotation /// 0003677 // DNA binding // inferred from electronic annotation /// 0003677 // DNA binding // inferred from sequence or structural similarity /// 0003678 // DNA helicase activity // inferred from electronic annotation /// 0003678 // DNA helicase activit…	---
Trib2	0.00488493	10399470	1426641	Trib2	44.9673	52.8109	48.8891	105.241	126.744	0.427278	0.416675	0.421976	115.993	0.421485	BB354684	tribbles homolog 2 (Drosophila)	0006468 // protein amino acid phosphorylation // inferred from electronic annotation /// 0006468 // protein amino acid phosphorylation // inferred from sequence or structural similarity /// 0043405 // regulation of MAP kinase activity // inferred from sequence or structural similarity	0005737 // cytoplasm // inferred from electronic annotation /// 0005737 // cytoplasm // inferred from sequence or structural similarity /// 0005856 // cytoskeleton // inferred from electronic annotation	0000166 // nucleotide binding // inferred from sequence or structural similarity /// 0004672 // protein kinase activity // inferred from electronic annotation /// 0004672 // protein kinase activity // inferred from sequence or structural similarity /// 0004860 // protein kinase inhibitor activity // inferred from electronic annotation /// 0005515 // protein binding // inferred from physical inter…	---
Abhd4	0.00192078	10415021	1416315	Abhd4	187.562	332.191	259.877	494.516	706.375	0.379285	0.470276	0.42478	600.446	0.432806	NM_134076	abhydrolase domain containing 4	0006508 // proteolysis // inferred from electronic annotation /// 0016042 // lipid catabolic process // inferred from electronic annotation	---	0004177 // aminopeptidase activity // inferred from electronic annotation /// 0016787 // hydrolase activity // inferred from electronic annotation	---
Naa40	0.000130539	10465638	1452120	Nat11	125.584	189.376	157.48	274.653	479.883	0.457246	0.39463	0.425938	377.268	0.417423	AV277760	N-acetyltransferase 11	0008152 // metabolic process // inferred from electronic annotation	---	0008080 // N-acetyltransferase activity // inferred from electronic annotation /// 0008415 // acyltransferase activity // inferred from electronic annotation /// 0016740 // transferase activity // inferred from electronic annotation	---
Baz2b	0.0211898	10482880	1440984	Baz2b	19.486	24.1066	21.7963	45.4333	53.8351	0.428892	0.447786	0.438339	49.6342	0.439138	BE943712	bromodomain adjacent to zinc finger domain, 2B	---	0005634 // nucleus // inferred from electronic annotation	0003677 // DNA binding // inferred from electronic annotation /// 0005515 // protein binding // inferred from electronic annotation /// 0008270 // zinc ion binding // inferred from electronic annotation /// 0046872 // metal ion binding // inferred from electronic annotation	---
Smap2	0.00389482	10515994	1450675	Smap2	115.948	124.974	120.461	293.147	254.9	0.395529	0.490285	0.442907	274.024	0.4396	NM_133716	stromal membrane-associated GTPase-activating protein 2	0032312 // regulation of ARF GTPase activity // inferred from electronic annotation	0005737 // cytoplasm // inferred from electronic annotation	0005096 // GTPase activator activity // inferred from electronic annotation /// 0008060 // ARF GTPase activator activity // inferred from electronic annotation /// 0008270 // zinc ion binding // inferred from electronic annotation /// 0046872 // metal ion binding // inferred from electronic annotation	---
Akap1	0.0211898	10389701	1449019	Akap1	576.494	582.457	579.475	1161.67	1492.78	0.496261	0.390183	0.443222	1327.23	0.436606	BG067335	A kinase (PRKA) anchor protein 1	---	0005739 // mitochondrion // inferred from direct assay /// 0005739 // mitochondrion // inferred from electronic annotation /// 0005741 // mitochondrial outer membrane // inferred from electronic annotation /// 0005783 // endoplasmic reticulum // inferred from electronic annotation /// 0016020 // membrane // inferred from electronic annotation /// 0016021 // integral to membrane // inferred from e…	0003676 // nucleic acid binding // inferred from electronic annotation /// 0003723 // RNA binding // inferred from electronic annotation /// 0016301 // kinase activity // inferred from electronic annotation	G_Protein_Signaling // GenMAPP /// mRNA_processing_binding_Reactome // GenMAPP
Smad3	5.2e-05	10594404	1450471	Smad3	5.8546	17.2678	11.5612	10.3338	51.7471	0.566548	0.333695	0.450122	31.0404	0.372455	BI150236	MAD homolog 3 (Drosophila)	0000122 // negative regulation of transcription from RNA polymerase II promoter // inferred from direct assay /// 0001707 // mesoderm formation // inferred from mutant phenotype /// 0002076 // osteoblast development // inferred from genetic interaction /// 0006350 // transcription // inferred from electronic annotation /// 0006355 // regulation of transcription, DNA-dependent // inferred from ele…	0005622 // intracellular // inferred from electronic annotation /// 0005634 // nucleus // inferred from direct assay /// 0005634 // nucleus // inferred from electronic annotation /// 0005667 // transcription factor complex // inferred from electronic annotation /// 0005737 // cytoplasm // inferred from electronic annotation /// 0005886 // plasma membrane // inferred from direct assay	0003690 // double-stranded DNA binding // inferred from direct assay /// 0003700 // transcription factor activity // inferred from direct assay /// 0003700 // transcription factor activity // inferred from electronic annotation /// 0003700 // transcription factor activity // traceable author statement /// 0005515 // protein binding // inferred from direct assay /// 0005515 // protein binding // i…	Cell_Cycle_KEGG // GenMAPP /// Ovarian_Infertility_Genes // GenMAPP /// TGF_Beta_Signaling_Pathway // GenMAPP
Zbtb16	0.00023376	10593225	1427638	Zbtb16	58.8715	78.4719	68.6717	159.777	143.868	0.368461	0.545445	0.456953	151.822	0.452317	Z47205	zinc finger and BTB domain containing 16	0001501 // skeletal system development // inferred from mutant phenotype /// 0001823 // mesonephros development // inferred from direct assay /// 0007417 // central nervous system development // inferred from direct assay /// 0008285 // negative regulation of cell proliferation // inferred from mutant phenotype /// 0009880 // embryonic pattern specification // inferred from mutant phenotype /// 0…	0005622 // intracellular // inferred from electronic annotation /// 0005634 // nucleus // inferred from direct assay /// 0005634 // nucleus // not recorded /// 0005634 // nucleus // inferred from sequence or structural similarity /// 0005829 // cytosol // inferred from electronic annotation /// 0005886 // plasma membrane // inferred from electronic annotation /// 0016607 // nuclear speck // infer…	0003676 // nucleic acid binding // inferred from electronic annotation /// 0003677 // DNA binding // not recorded /// 0003690 // double-stranded DNA binding // inferred from electronic annotation /// 0003700 // transcription factor activity // inferred from electronic annotation /// 0005515 // protein binding // inferred from physical interaction /// 0005515 // protein binding // not recorded ///…	---
Ablim2	0.000699194	10521415	1455313	Ablim2	16.3868	49.2028	32.7948	28.7379	140.008	0.570216	0.351428	0.460822	84.3732	0.388688	BB336053	actin-binding LIM protein 2	0007010 // cytoskeleton organization // inferred from electronic annotation /// 0045944 // positive regulation of transcription from RNA polymerase II promoter // inferred from mutant phenotype	0005737 // cytoplasm // inferred from electronic annotation /// 0015629 // actin cytoskeleton // not recorded /// 0030016 // myofibril // inferred from direct assay	0003779 // actin binding // inferred from electronic annotation /// 0008270 // zinc ion binding // inferred from electronic annotation /// 0046872 // metal ion binding // inferred from electronic annotation	---
Papola	0.002767	10398147	1455836	Papola	271.966	380.618	326.292	731.22	688.572	0.371935	0.552764	0.462349	709.896	0.459633	BM230222	poly (A) polymerase alpha	0006350 // transcription // inferred from electronic annotation /// 0006397 // mRNA processing // inferred from electronic annotation /// 0031123 // RNA 3'-end processing // inferred from electronic annotation /// 0043631 // RNA polyadenylation // inferred from electronic annotation	0005634 // nucleus // inferred from electronic annotation	0003723 // RNA binding // inferred from electronic annotation /// 0004652 // polynucleotide adenylyltransferase activity // inferred from electronic annotation /// 0016740 // transferase activity // inferred from electronic annotation /// 0016779 // nucleotidyltransferase activity // inferred from electronic annotation	mRNA_processing_binding_Reactome // GenMAPP
Tiparp	6.8e-06	10492428	1452161	Tiparp	229.725	360.568	295.147	574.991	649.632	0.399527	0.555035	0.477281	612.312	0.48202	BB707122	TCDD-inducible poly(ADP-ribose) polymerase	0006471 // protein amino acid ADP-ribosylation // inferred from direct assay	0005634 // nucleus // inferred from electronic annotation	0003676 // nucleic acid binding // inferred from electronic annotation /// 0003950 // NAD+ ADP-ribosyltransferase activity // inferred from electronic annotation /// 0005515 // protein binding // inferred from electronic annotation /// 0008270 // zinc ion binding // inferred from electronic annotation /// 0016740 // transferase activity // inferred from electronic annotation /// 0016757 // transf…	---
Ddhd1	0.011578	10419240	1427289	Ddhd1	30.002	3.11169	16.5568	34.1357	34.1926	0.878903	0.0910046	0.484954	34.1642	0.484626	AV265534	DDHD domain containing 1	0016042 // lipid catabolic process // inferred from electronic annotation	0005737 // cytoplasm // inferred from electronic annotation	0016787 // hydrolase activity // inferred from electronic annotation /// 0046872 // metal ion binding // inferred from electronic annotation	---
Nrip1	1.13e-07	10440406	1418469	Nrip1	230.158	1096.52	663.34	839.537	1552.78	0.274148	0.70617	0.490159	1196.16	0.55456	NM_008735	nuclear receptor interacting protein 1	0000122 // negative regulation of transcription from RNA polymerase II promoter // inferred from direct assay /// 0000122 // negative regulation of transcription from RNA polymerase II promoter // inferred from electronic annotation /// 0001543 // ovarian follicle rupture // inferred from mutant phenotype /// 0006350 // transcription // inferred from electronic annotation /// 0006355 // regulatio…	0000118 // histone deacetylase complex // inferred from physical interaction /// 0005634 // nucleus // inferred from direct assay /// 0005634 // nucleus // inferred from electronic annotation	0003713 // transcription coactivator activity // inferred from electronic annotation /// 0003714 // transcription corepressor activity // inferred from direct assay /// 0003714 // transcription corepressor activity // inferred from electronic annotation /// 0004872 // receptor activity // inferred from electronic annotation /// 0005102 // receptor binding // inferred from physical interaction ///…	Ovarian_Infertility_Genes // GenMAPP
Fam65b	3.77e-05	10404152	1460555	Fam65b	634.558	614.814	624.686	1908.21	936.972	0.332541	0.656171	0.494356	1422.59	0.439118	BM242294	family with sequence similarity 65, member B	---	---	0005488 // binding // inferred from electronic annotation	---
Hyou1	0.0211898	10584712	1423290	Hyou1	15.0158	35.5979	25.3069	62.4719	47.5633	0.240362	0.748432	0.494397	55.0176	0.459978	BM231738	hypoxia up-regulated 1	0001666 // response to hypoxia // inferred from electronic annotation /// 0006950 // response to stress // traceable author statement /// 0006950 // response to stress // inferred from electronic annotation	0005783 // endoplasmic reticulum // inferred from electronic annotation /// 0005788 // endoplasmic reticulum lumen // inferred from electronic annotation	0000166 // nucleotide binding // inferred from electronic annotation /// 0005515 // protein binding // inferred from electronic annotation /// 0005524 // ATP binding // inferred from electronic annotation	---
Tfcp2l1	9.73e-06	10349295	1418091	Tcfcp2l1	146.241	349.029	247.635	274.359	764.264	0.533027	0.456687	0.494857	519.312	0.476852	NM_023755	transcription factor CP2-like 1	0000122 // negative regulation of transcription from RNA polymerase II promoter // inferred from direct assay /// 0000902 // cell morphogenesis // inferred from mutant phenotype /// 0002070 // epithelial cell maturation // inferred from mutant phenotype /// 0006350 // transcription // inferred from electronic annotation /// 0006355 // regulation of transcription, DNA-dependent // inferred from el…	0005634 // nucleus // inferred from direct assay /// 0005634 // nucleus // inferred from electronic annotation /// 0005667 // transcription factor complex // not recorded /// 0005737 // cytoplasm // inferred from direct assay /// 0016020 // membrane // inferred from direct assay	0003677 // DNA binding // inferred from electronic annotation /// 0016565 // general transcriptional repressor activity // inferred from direct assay	---
Zfp956	0.0173912	10537938	1434857	A230106D06Rik	62.3853	47.5289	54.9571	134.827	87.7822	0.462707	0.541442	0.502074	111.305	0.493755	BB183320	RIKEN cDNA A230106D06 gene	---	0005622 // intracellular // inferred from electronic annotation	0008270 // zinc ion binding // inferred from electronic annotation	---
D230025D16Rik	1.38e-05	10574641	1426521	D230025D16Rik	203.357	575.555	389.456	893.498	730.107	0.227597	0.788316	0.507957	811.803	0.479743	BG065702	RIKEN cDNA D230025D16 gene	0043001 // Golgi to plasma membrane protein transport // not recorded	0005624 // membrane fraction // not recorded /// 0005802 // trans-Golgi network // not recorded /// 0030425 // dendrite // not recorded /// 0030672 // synaptic vesicle membrane // not recorded	0005102 // receptor binding // not recorded	---
P2ry2	0.00150322	10565962	1450318	P2ry2	41.9807	193.257	117.619	105.138	311.792	0.399293	0.619825	0.509559	208.465	0.564213	NM_008773	purinergic receptor P2Y, G-protein coupled 2	0007165 // signal transduction // inferred from electronic annotation /// 0007186 // G-protein coupled receptor protein signaling pathway // inferred from electronic annotation	0005886 // plasma membrane // inferred from electronic annotation /// 0016020 // membrane // inferred from electronic annotation /// 0016021 // integral to membrane // inferred from electronic annotation	0004871 // signal transducer activity // inferred from electronic annotation /// 0004872 // receptor activity // inferred from electronic annotation /// 0004930 // G-protein coupled receptor activity // inferred from electronic annotation /// 0045028 // purinergic nucleotide receptor activity, G-protein coupled // inferred from electronic annotation	GPCRDB_Class_A_Rhodopsin-like // GenMAPP /// Nucleotide_GPCRs // GenMAPP
Tle4	0.000699194	10466374	1425650	Tle4	59.6979	181.363	120.531	140.448	302.283	0.425055	0.599979	0.512517	221.365	0.544487	AF229633	transducin-like enhancer of split 4, homolog of Drosophila E(spl)	0000122 // negative regulation of transcription from RNA polymerase II promoter // inferred from direct assay /// 0006350 // transcription // inferred from electronic annotation /// 0006355 // regulation of transcription, DNA-dependent // inferred from electronic annotation /// 0016055 // Wnt receptor signaling pathway // inferred from direct assay /// 0016055 // Wnt receptor signaling pathway //…	0005634 // nucleus // inferred by curator /// 0005634 // nucleus // inferred from electronic annotation	0003682 // chromatin binding // inferred from direct assay /// 0003705 // RNA polymerase II transcription factor activity, enhancer binding // inferred from genetic interaction /// 0003714 // transcription corepressor activity // inferred from direct assay /// 0003714 // transcription corepressor activity // inferred from genetic interaction /// 0005515 // protein binding // inferred from physica…	---
Pdp2	0.00758419	10574488	1428996	4833426J09Rik	79.5963	88.5499	84.0731	125.612	222.516	0.633665	0.397949	0.515807	174.064	0.483	AK014774	RIKEN cDNA 4833426J09 gene	0006470 // protein amino acid dephosphorylation // inferred from electronic annotation	0008287 // protein serine/threonine phosphatase complex // inferred from electronic annotation	0000287 // magnesium ion binding // inferred from electronic annotation /// 0003824 // catalytic activity // inferred from electronic annotation /// 0004721 // phosphoprotein phosphatase activity // inferred from electronic annotation /// 0004722 // protein serine/threonine phosphatase activity // inferred from electronic annotation /// 0016787 // hydrolase activity // inferred from electronic an…	---
Tead4	3.77e-05	10548146	1460683	Tead4	10.3353	8.14538	9.24035	12.5365	38.6778	0.824417	0.210595	0.517506	25.6072	0.36085	D87966	TEA domain family member 4	0001701 // in utero embryonic development // inferred from mutant phenotype /// 0001708 // cell fate specification // inferred from mutant phenotype /// 0001825 // blastocyst formation // inferred from mutant phenotype /// 0001830 // trophectodermal cell fate commitment // inferred from mutant phenotype /// 0006350 // transcription // inferred from electronic annotation /// 0006355 // regulation …	0005634 // nucleus // inferred from electronic annotation /// 0005667 // transcription factor complex // inferred from direct assay	0003677 // DNA binding // inferred from direct assay /// 0003677 // DNA binding // inferred from electronic annotation /// 0003700 // transcription factor activity // inferred from electronic annotation /// 0016563 // transcription activator activity // inferred from genetic interaction	---
Mks1	0.00244254	10380189	1435835	Mks1	26.0428	100.486	63.2644	85.6795	135.886	0.303955	0.73949	0.521723	110.783	0.571068	BB033151	Meckel syndrome, type 1	---	---	---	---
Slc38a4	0.000699194	10431915	1448889	Slc38a4	1021.08	2307.4	1664.24	3004.41	3229.9	0.339859	0.714386	0.527122	3117.16	0.533896	NM_027052	solute carrier family 38, member 4	0006810 // transport // inferred from electronic annotation /// 0006811 // ion transport // inferred from electronic annotation /// 0006814 // sodium ion transport // inferred from electronic annotation /// 0006865 // amino acid transport // inferred from electronic annotation	0005886 // plasma membrane // inferred from electronic annotation /// 0016020 // membrane // inferred from electronic annotation /// 0016021 // integral to membrane // inferred from electronic annotation	0015293 // symporter activity // inferred from electronic annotation /// 0031402 // sodium ion binding // inferred from electronic annotation	---
Amer1	7.11e-05	10605811	1453774	Fam123b	193.595	124.531	159.063	270.904	361.975	0.714628	0.344031	0.52933	316.439	0.502665	BG088695	family with sequence similarity 123, member B	---	---	---	---
Cecr2	5.2e-05	10541260	1431014	Cecr2	99.4885	37.3005	68.3945	138.429	109.387	0.718698	0.340995	0.529846	123.908	0.551978	AK013061	cat eye syndrome chromosome region, candidate 2 homolog (human)	---	---	---	---
Tnrc6b	0.00150322	10425430	1426545	Tnrc6b	220.893	394.001	307.447	439.524	700.484	0.502574	0.56247	0.532522	570.004	0.539378	BG067897	trinucleotide repeat containing 6b	---	---	0000166 // nucleotide binding // inferred from electronic annotation /// 0005488 // binding // inferred from electronic annotation	---
Dyrk1b	0.00549239	10551469	1422254	Dyrk1b	128.648	100.192	114.42	248.579	182.757	0.517534	0.548227	0.532881	215.668	0.530539	NM_010092	dual-specificity tyrosine-(Y)-phosphorylation regulated kinase 1b	0006468 // protein amino acid phosphorylation // inferred from electronic annotation /// 0007520 // myoblast fusion // inferred from mutant phenotype /// 0045893 // positive regulation of transcription, DNA-dependent // inferred from electronic annotation	0005634 // nucleus // inferred from electronic annotation	0000166 // nucleotide binding // inferred from electronic annotation /// 0003713 // transcription coactivator activity // inferred from electronic annotation /// 0004672 // protein kinase activity // inferred from electronic annotation /// 0004674 // protein serine/threonine kinase activity // inferred from electronic annotation /// 0004713 // protein tyrosine kinase activity // inferred from ele…	---
Dgat1	0.00244254	10429926	1418295	Dgat1	94.9966	163.632	129.314	165.518	327.294	0.573937	0.499956	0.536946	246.406	0.524803	BC003717	diacylglycerol O-acyltransferase 1	0019432 // triacylglycerol biosynthetic process // inferred from electronic annotation /// 0030073 // insulin secretion // inferred from electronic annotation /// 0046486 // glycerolipid metabolic process // inferred from electronic annotation	0005624 // membrane fraction // inferred from direct assay /// 0005783 // endoplasmic reticulum // inferred from electronic annotation /// 0005789 // endoplasmic reticulum membrane // inferred from electronic annotation /// 0005792 // microsome // inferred from electronic annotation /// 0016020 // membrane // inferred from electronic annotation /// 0016021 // integral to membrane // inferred from…	0003846 // 2-acylglycerol O-acyltransferase activity // inferred from direct assay /// 0004144 // diacylglycerol O-acyltransferase activity // inferred from electronic annotation /// 0005504 // fatty acid binding // inferred from electronic annotation /// 0008415 // acyltransferase activity // inferred from electronic annotation /// 0016740 // transferase activity // inferred from electronic anno…	Statin_Pathway_PharmGKB // GenMAPP
Per3	1.6e-08	10518781	1460662	Per3	17.7941	3.96839	10.8812	18.0092	45.8799	0.988057	0.0864951	0.537276	31.9446	0.340629	NM_011067	period homolog 3 (Drosophila)	0000160 // two-component signal transduction system (phosphorelay) // inferred from electronic annotation /// 0006350 // transcription // inferred from electronic annotation /// 0006355 // regulation of transcription, DNA-dependent // inferred from electronic annotation /// 0007165 // signal transduction // inferred from electronic annotation /// 0007623 // circadian rhythm // inferred from direc…	0005634 // nucleus // inferred from electronic annotation /// 0005737 // cytoplasm // inferred from electronic annotation	0000155 // two-component sensor activity // inferred from electronic annotation /// 0004871 // signal transducer activity // inferred from electronic annotation	---
Mast4	1.79e-07	10411804	1437404	Mast4	415.89	445.642	430.766	1257.97	597.348	0.330604	0.746033	0.538319	927.66	0.464358	AI642422	microtubule associated serine/threonine kinase family member 4	0006468 // protein amino acid phosphorylation // inferred from electronic annotation	0005737 // cytoplasm // inferred from electronic annotation	0000166 // nucleotide binding // inferred from electronic annotation /// 0000287 // magnesium ion binding // inferred from electronic annotation /// 0004672 // protein kinase activity // inferred from electronic annotation /// 0004674 // protein serine/threonine kinase activity // inferred from electronic annotation /// 0005515 // protein binding // inferred from electronic annotation /// 0005524…	---
Irf8	0.00609984	10576034	1416714	Irf8	87.3693	217.887	152.628	309.192	272.344	0.282573	0.800046	0.54131	290.768	0.524915	BG069095	interferon regulatory factor 8	0006350 // transcription // inferred from electronic annotation /// 0006355 // regulation of transcription, DNA-dependent // traceable author statement /// 0006355 // regulation of transcription, DNA-dependent // inferred from electronic annotation /// 0006955 // immune response // inferred from mutant phenotype /// 0030099 // myeloid cell differentiation // inferred from mutant phenotype	0005634 // nucleus // inferred from electronic annotation	0003677 // DNA binding // inferred from electronic annotation /// 0003700 // transcription factor activity // traceable author statement /// 0003700 // transcription factor activity // inferred from electronic annotation	---
Ubn1	0.0142182	10433352	1438401	Ubn1	606.641	647.398	627.019	1121.76	1194.55	0.540796	0.541958	0.541377	1158.15	0.541395	AW124741	ubinuclein 1	0030216 // keratinocyte differentiation // traceable author statement	0005634 // nucleus // not recorded	0008134 // transcription factor binding // not recorded	---
Pfkfb3	9.73e-06	10480035	1416432	Pfkfb3	1915.53	1453.73	1684.63	6089.17	1889.39	0.31458	0.769418	0.541999	3989.28	0.42229	NM_133232	6-phosphofructo-2-kinase/fructose-2,6-biphosphatase 3	0006000 // fructose metabolic process // inferred from electronic annotation /// 0006003 // fructose 2,6-bisphosphate metabolic process // inferred from electronic annotation /// 0008152 // metabolic process // inferred from electronic annotation	---	0003824 // catalytic activity // inferred from electronic annotation /// 0003873 // 6-phosphofructo-2-kinase activity // inferred from electronic annotation /// 0004331 // fructose-2,6-bisphosphate 2-phosphatase activity // inferred from electronic annotation /// 0005524 // ATP binding // inferred from electronic annotation /// 0016301 // kinase activity // inferred from electronic annotation ///…	---
Fam120c	0.00609984	10602454	1441123	ORF34	37.5592	7.4005	22.4799	40.6864	43.6913	0.923139	0.169382	0.54626	42.1889	0.532838	BB023801	open reading frame 34	---	---	---	---
Fam76a	9.66e-05	10516994	1425327	Fam76a	314.706	499.61	407.158	683.329	782.922	0.460549	0.638135	0.549342	733.126	0.555373	AU067643	family with sequence similarity 76, member A	---	---	---	---
Prkag2	0.00389482	10528702	1423831	Prkag2	85.7189	211.842	148.781	214.818	298.493	0.399031	0.709706	0.554368	256.655	0.57969	BB756794	protein kinase, AMP-activated, gamma 2 non-catalytic subunit	0006633 // fatty acid biosynthetic process // inferred from electronic annotation /// 0006950 // response to stress // traceable author statement /// 0008610 // lipid biosynthetic process // inferred from electronic annotation /// 0050790 // regulation of catalytic activity // inferred from electronic annotation	0031588 // AMP-activated protein kinase complex // inferred from electronic annotation	0004679 // AMP-activated protein kinase activity // traceable author statement /// 0004679 // AMP-activated protein kinase activity // inferred from electronic annotation /// 0016208 // AMP binding // inferred from electronic annotation /// 0016301 // kinase activity // inferred from electronic annotation /// 0019901 // protein kinase binding // inferred from electronic annotation	---
Ccdc134	0.00031003	10425686	1428261	Ccdc134	134.993	289.716	212.354	298.934	434.718	0.451582	0.666445	0.559013	366.826	0.578897	AK009756	coiled-coil domain containing 134	---	0005576 // extracellular region // inferred from electronic annotation	---	---
Etnk1	0.0211898	10542677	1430996	Etnk1	38.0304	6.47847	22.2544	49.3617	17.4313	0.770444	0.371656	0.57105	33.3965	0.66637	BG867902	ethanolamine kinase 1	0006646 // phosphatidylethanolamine biosynthetic process // inferred from electronic annotation	0005737 // cytoplasm // inferred from electronic annotation	0004305 // ethanolamine kinase activity // inferred from electronic annotation /// 0016301 // kinase activity // inferred from electronic annotation /// 0016740 // transferase activity // inferred from electronic annotation	---
Abtb2	0.00389482	10474181	1433454	Abtb2	9.60289	38.1497	23.8763	13.1021	92.272	0.732927	0.413449	0.573188	52.6871	0.453172	BB621938	ankyrin repeat and BTB (POZ) domain containing 2	---	---	0003677 // DNA binding // inferred from electronic annotation /// 0005515 // protein binding // inferred from electronic annotation	---
Slc22a23	0.011578	10408616	1453004	Slc22a23	494.45	354.031	424.241	824.622	643.411	0.599608	0.550242	0.574925	734.016	0.577972	BM234253	solute carrier family 22, member 23	0006810 // transport // inferred from electronic annotation /// 0006811 // ion transport // inferred from electronic annotation	0016020 // membrane // inferred from electronic annotation /// 0016021 // integral to membrane // inferred from electronic annotation	0005215 // transporter activity // inferred from electronic annotation	---
Rbm18	0.0173912	10482109	1420607	Rbm18	357.435	641.958	499.697	769.834	925.385	0.464302	0.693719	0.579011	847.61	0.589536	AV116216	RNA binding motif protein 18	---	---	0000166 // nucleotide binding // inferred from electronic annotation /// 0003676 // nucleic acid binding // inferred from electronic annotation /// 0003723 // RNA binding // inferred from electronic annotation	mRNA_processing_binding_Reactome // GenMAPP
Tsnax	0.00609984	10576532	1423395	LOC100039215 /// Tsnax	1418.41	3432.72	2425.57	4005.04	4172.11	0.354156	0.822779	0.588467	4088.58	0.593254	BM021706	similar to translin associated protein X /// translin-associated factor X	0007275 // multicellular organismal development // inferred from electronic annotation /// 0007283 // spermatogenesis // inferred from electronic annotation /// 0030154 // cell differentiation // inferred from electronic annotation	0005634 // nucleus // inferred from electronic annotation /// 0005737 // cytoplasm // inferred from direct assay /// 0005737 // cytoplasm // inferred from electronic annotation	0005515 // protein binding // inferred from physical interaction /// 0043565 // sequence-specific DNA binding // inferred from electronic annotation	---
Creb3l1	1.79e-07	10485117	1419295	Creb3l1	80.106	107.143	93.6245	164.014	155.347	0.48841	0.6897	0.589055	159.681	0.586324	BC016447	cAMP responsive element binding protein 3-like 1	0006350 // transcription // inferred from electronic annotation /// 0006355 // regulation of transcription, DNA-dependent // inferred from electronic annotation /// 0006986 // response to unfolded protein // inferred from electronic annotation /// 0045449 // regulation of transcription // inferred from electronic annotation	0005634 // nucleus // inferred from electronic annotation /// 0005783 // endoplasmic reticulum // inferred from electronic annotation /// 0005789 // endoplasmic reticulum membrane // inferred from electronic annotation /// 0016020 // membrane // inferred from electronic annotation /// 0016021 // integral to membrane // inferred from electronic annotation	0003677 // DNA binding // inferred from electronic annotation /// 0003700 // transcription factor activity // inferred from sequence or structural similarity /// 0003700 // transcription factor activity // inferred from electronic annotation /// 0043565 // sequence-specific DNA binding // inferred from electronic annotation /// 0046983 // protein dimerization activity // inferred from electronic …	G1_to_S_cell_cycle_Reactome // GenMAPP
Slc7a2	0.000536109	10571444	1436555	Slc7a2	953.885	2063.78	1508.83	1888.16	3064.97	0.505191	0.673345	0.589268	2476.57	0.609244	AV244175	solute carrier family 7 (cationic amino acid transporter, y+ system), member 2	0002537 // production of nitric oxide during acute inflammatory response // inferred from mutant phenotype /// 0006809 // nitric oxide biosynthetic process // inferred from mutant phenotype /// 0006810 // transport // inferred from electronic annotation /// 0006865 // amino acid transport // inferred from electronic annotation /// 0015807 // L-amino acid transport // inferred from direct assay //…	0016020 // membrane // inferred from electronic annotation /// 0016021 // integral to membrane // inferred by curator /// 0016021 // integral to membrane // inferred from direct assay /// 0016021 // integral to membrane // inferred from electronic annotation	0000064 // L-ornithine transmembrane transporter activity // inferred from direct assay /// 0005289 // high affinity arginine transmembrane transporter activity // inferred from direct assay /// 0015171 // amino acid transmembrane transporter activity // inferred from electronic annotation /// 0015179 // L-amino acid transmembrane transporter activity // inferred from direct assay /// 0015179 // …	---
Lpin1	7.11e-05	10399478	1418288	Lpin1	8584.55	9168.5	8876.53	16712.9	13735.5	0.513649	0.667505	0.590577	15224.2	0.583055	NM_015763	lipin 1	0006629 // lipid metabolic process // inferred from mutant phenotype /// 0031529 // ruffle organization // inferred from mutant phenotype /// 0031532 // actin cytoskeleton reorganization // inferred from mutant phenotype /// 0032869 // cellular response to insulin stimulus // inferred from mutant phenotype /// 0045444 // fat cell differentiation // non-traceable author statement /// 0045598 // re…	0005634 // nucleus // inferred from direct assay /// 0005634 // nucleus // inferred from electronic annotation	0008195 // phosphatidate phosphatase activity // inferred from direct assay	---
Nktr	0.000699194	10590389	1423248	Nktr	495.436	825.854	660.645	1089.23	1132.9	0.45485	0.728972	0.591911	1111.07	0.594605	BB317504	natural killer tumor recognition sequence	0006457 // protein folding // inferred from electronic annotation	---	0003755 // peptidyl-prolyl cis-trans isomerase activity // inferred from electronic annotation /// 0016853 // isomerase activity // inferred from electronic annotation /// 0042277 // peptide binding // inferred from electronic annotation	---
Myo10	7.11e-05	10423293	1422544	Myo10	468.405	630.631	549.518	979.386	893.677	0.478263	0.705659	0.591961	936.532	0.586759	AV297945	myosin X	0007165 // signal transduction // inferred from electronic annotation	0005856 // cytoskeleton // inferred from electronic annotation /// 0016459 // myosin complex // inferred from electronic annotation	0000166 // nucleotide binding // inferred from electronic annotation /// 0003774 // motor activity // inferred from electronic annotation /// 0005488 // binding // inferred from electronic annotation /// 0005524 // ATP binding // inferred from electronic annotation	---
Shisa5	0.011578	10589350	1423986	Shisa5	162.046	373.471	267.758	498.056	432.093	0.325357	0.864328	0.594843	465.075	0.575732	BC010238	shisa homolog 5 (Xenopus laevis)	0006915 // apoptosis // inferred from electronic annotation /// 0006917 // induction of apoptosis // inferred from direct assay /// 0008632 // apoptotic program // inferred from direct assay	0005634 // nucleus // inferred from electronic annotation /// 0005635 // nuclear envelope // inferred from direct assay /// 0005783 // endoplasmic reticulum // inferred from direct assay /// 0005783 // endoplasmic reticulum // inferred from electronic annotation /// 0005789 // endoplasmic reticulum membrane // inferred from electronic annotation /// 0016020 // membrane // inferred from electronic…	---	---
Asb8	0.0142182	10432122	1424224	Asb8	1661.22	2920.05	2290.64	2979.74	4592.57	0.557505	0.635821	0.596663	3786.15	0.605004	AF398969	ankyrin repeat and SOCS box-containing 8	0006511 // ubiquitin-dependent protein catabolic process // inferred from electronic annotation /// 0007242 // intracellular signaling cascade // inferred from electronic annotation	0005737 // cytoplasm // inferred from electronic annotation	---	---
Foxp1	0.011578	10546661	1421140	Foxp1	187.561	310.971	249.266	392.921	432.577	0.477349	0.718879	0.598114	412.749	0.603916	BG962849	forkhead box P1	0000122 // negative regulation of transcription from RNA polymerase II promoter // inferred from direct assay /// 0002053 // positive regulation of mesenchymal cell proliferation // inferred from genetic interaction /// 0002329 // pre-B cell differentiation // inferred from mutant phenotype /// 0002639 // positive regulation of immunoglobulin production // inferred from mutant phenotype /// 00063…	0005622 // intracellular // inferred from electronic annotation /// 0005634 // nucleus // inferred by curator /// 0005634 // nucleus // inferred from direct assay /// 0005634 // nucleus // inferred from electronic annotation	0003677 // DNA binding // inferred from direct assay /// 0003677 // DNA binding // inferred from electronic annotation /// 0003700 // transcription factor activity // inferred from direct assay /// 0003700 // transcription factor activity // inferred from electronic annotation /// 0003705 // RNA polymerase II transcription factor activity, enhancer binding // inferred from direct assay /// 000551…	---
Aldh9a1	0.00488493	10351414	1437398	Aldh9a1	139.387	148.063	143.725	236.226	239.294	0.590059	0.61875	0.604405	237.76	0.604497	BB703752	aldehyde dehydrogenase 9, subfamily A1	0006081 // cellular aldehyde metabolic process // inferred from electronic annotation /// 0008152 // metabolic process // inferred from electronic annotation /// 0009437 // carnitine metabolic process // inferred from direct assay /// 0042136 // neurotransmitter biosynthetic process // inferred from electronic annotation /// 0055114 // oxidation reduction // inferred from electronic annotation	0005737 // cytoplasm // inferred from electronic annotation /// 0005829 // cytosol // inferred from direct assay	0004029 // aldehyde dehydrogenase (NAD) activity // inferred from electronic annotation /// 0016491 // oxidoreductase activity // inferred from electronic annotation /// 0016620 // oxidoreductase activity, acting on the aldehyde or oxo group of donors, NAD or NADP as acceptor // inferred from direct assay /// 0019145 // aminobutyraldehyde dehydrogenase activity // inferred from electronic annotat…	---
Rubcn	0.00117065	10439092	1428243	1700021K19Rik	284.697	515.217	399.957	577.421	716.348	0.493049	0.719227	0.606138	646.884	0.618282	AK006217	RIKEN cDNA 1700021K19 gene	---	---	---	---
Itga6	0.0173912	10472820	1422444	Itga6	364.376	363.468	363.922	573.658	619.603	0.63518	0.586615	0.610898	596.63	0.609963	BM935811	integrin alpha 6	0007155 // cell adhesion // inferred from electronic annotation /// 0007160 // cell-matrix adhesion // inferred from mutant phenotype /// 0007229 // integrin-mediated signaling pathway // inferred from electronic annotation /// 0016337 // cell-cell adhesion // inferred from electronic annotation /// 0022409 // positive regulation of cell-cell adhesion // inferred from direct assay /// 0031668 // …	0005886 // plasma membrane // inferred from direct assay /// 0005913 // cell-cell adherens junction // inferred from electronic annotation /// 0008305 // integrin complex // inferred from direct assay /// 0008305 // integrin complex // inferred from electronic annotation /// 0009897 // external side of plasma membrane // inferred from direct assay /// 0009986 // cell surface // inferred from dire…	0004872 // receptor activity // inferred from electronic annotation /// 0005178 // integrin binding // inferred from physical interaction /// 0005509 // calcium ion binding // inferred from electronic annotation /// 0005515 // protein binding // inferred from electronic annotation /// 0043236 // laminin binding // inferred from electronic annotation	Integrin-mediated_cell_adhesion_KEGG // GenMAPP
Epn2	0.00939007	10386743	1427225	Epn2	58.5535	84.6389	71.5962	83.9597	161.251	0.6974	0.524888	0.611144	122.606	0.583956	AF057286	epsin 2	0006897 // endocytosis // inferred from electronic annotation /// 0030100 // regulation of endocytosis // inferred from electronic annotation	0005737 // cytoplasm // inferred from electronic annotation /// 0030128 // clathrin coat of endocytic vesicle // inferred from electronic annotation	0008289 // lipid binding // inferred from electronic annotation	---
Zfp507	0.000907061	10562523	1435002	Zfp507	542.984	673.793	608.389	964.011	1019.45	0.563255	0.66094	0.612098	991.728	0.613463	BM249415	zinc finger protein 507	0006350 // transcription // inferred from electronic annotation /// 0006355 // regulation of transcription, DNA-dependent // inferred from electronic annotation	0005622 // intracellular // inferred from electronic annotation /// 0005634 // nucleus // inferred from electronic annotation	0003677 // DNA binding // inferred from electronic annotation /// 0008270 // zinc ion binding // inferred from electronic annotation /// 0046872 // metal ion binding // inferred from electronic annotation	---
Smad7	0.00939007	10456745	1423389	Smad7	100.925	149.582	125.253	149.95	269.801	0.673055	0.554416	0.613736	209.876	0.596798	BF226166	MAD homolog 7 (Drosophila)	0006350 // transcription // inferred from electronic annotation /// 0006355 // regulation of transcription, DNA-dependent // inferred from electronic annotation /// 0007179 // transforming growth factor beta receptor signaling pathway // inferred from direct assay /// 0007179 // transforming growth factor beta receptor signaling pathway // inferred from electronic annotation	0005622 // intracellular // inferred from electronic annotation /// 0005634 // nucleus // inferred from electronic annotation /// 0005667 // transcription factor complex // inferred from electronic annotation /// 0005737 // cytoplasm // inferred from electronic annotation	0003700 // transcription factor activity // inferred from electronic annotation /// 0005515 // protein binding // inferred from electronic annotation /// 0005518 // collagen binding // inferred from physical interaction	TGF_Beta_Signaling_Pathway // GenMAPP
Igf2bp2	0.0211898	10438603	1437103	Igf2bp2	95.2439	12.3554	53.7997	169.931	18.4566	0.560486	0.669428	0.614957	94.1939	0.571159	AV293532	insulin-like growth factor 2 mRNA binding protein 2	0006417 // regulation of translation // inferred from electronic annotation	0005634 // nucleus // inferred from electronic annotation /// 0005737 // cytoplasm // inferred from electronic annotation /// 0044430 // cytoskeletal part // inferred from electronic annotation	0000166 // nucleotide binding // inferred from electronic annotation /// 0003676 // nucleic acid binding // inferred from electronic annotation /// 0003723 // RNA binding // inferred from electronic annotation /// 0005515 // protein binding // inferred from electronic annotation /// 0048027 // mRNA 5'-UTR binding // inferred from electronic annotation	---
Pigt	0.00609984	10478508	1428740	LOC100046871 /// Pigt	141.804	121.729	131.767	194.472	238.064	0.729175	0.51133	0.620253	216.268	0.609275	AK019717	similar to GPI transamidase component PIG-T precursor (Phosphatidylinositol-glycan biosynthesis class T protein) (Neuronal development-associated protein 7) /// phosphatidylinositol glycan anchor biosynthesis, class T	0006506 // GPI anchor biosynthetic process // inferred from electronic annotation /// 0016255 // attachment of GPI anchor to protein // traceable author statement /// 0030182 // neuron differentiation // inferred from direct assay /// 0051402 // neuron apoptosis // inferred from direct assay	0005737 // cytoplasm // inferred from direct assay /// 0005783 // endoplasmic reticulum // inferred from electronic annotation /// 0005789 // endoplasmic reticulum membrane // inferred from electronic annotation /// 0016020 // membrane // inferred from electronic annotation /// 0016021 // integral to membrane // inferred from electronic annotation /// 0016023 // cytoplasmic membrane-bounded vesic…	0003923 // GPI-anchor transamidase activity // inferred from mutant phenotype /// 0005515 // protein binding // inferred from sequence or structural similarity	---
Col4a1	9.96e-07	10576973	1452035	Col4a1	6413.14	5707.45	6060.3	12166.5	7998.6	0.527117	0.713556	0.620336	10082.5	0.601069	BF158638	collagen, type IV, alpha 1	---	0005576 // extracellular region // inferred from electronic annotation /// 0005578 // proteinaceous extracellular matrix // inferred from electronic annotation /// 0005581 // collagen // inferred from electronic annotation /// 0005587 // collagen type IV // inferred from direct assay /// 0005604 // basement membrane // inferred from direct assay /// 0005604 // basement membrane // inferred from e…	0005201 // extracellular matrix structural constituent // inferred from electronic annotation /// 0005488 // binding // inferred from electronic annotation /// 0048407 // platelet-derived growth factor binding // not recorded	---
Tspan9	0.00023376	10548128	1428197	Tspan9	408.813	483.003	445.908	692.761	742.113	0.590121	0.650849	0.620485	717.437	0.62153	AK020159	tetraspanin 9	---	0016020 // membrane // inferred from electronic annotation /// 0016021 // integral to membrane // inferred from electronic annotation	---	---
Atxn2	0.011578	10525313	1460653	Atxn2 /// LOC100047323	159.368	157.985	158.676	205.669	336.268	0.774874	0.469818	0.622346	270.969	0.585589	NM_009125	ataxin 2 /// similar to ataxin 2	0040015 // negative regulation of multicellular organism growth // inferred from mutant phenotype	0005737 // cytoplasm // inferred from electronic annotation /// 0048471 // perinuclear region of cytoplasm // inferred from direct assay	0050692 // DBD domain binding // inferred from direct assay	---
Sik3	0.0211898	10584977	1455437	BC033915	821.59	964.631	893.11	1474.85	1401.79	0.557067	0.688144	0.622606	1438.32	0.620941	AV369969	cDNA sequence BC033915	0006468 // protein amino acid phosphorylation // inferred from electronic annotation /// 0006468 // protein amino acid phosphorylation // inferred from sequence or structural similarity	0005737 // cytoplasm // inferred from electronic annotation	0000166 // nucleotide binding // inferred from electronic annotation /// 0000287 // magnesium ion binding // inferred from electronic annotation /// 0000287 // magnesium ion binding // inferred from sequence or structural similarity /// 0004672 // protein kinase activity // inferred from electronic annotation /// 0004674 // protein serine/threonine kinase activity // inferred from electronic anno…	---
Synj2	2.72e-05	10441456	1427685	Synj2	337.83	201.318	269.574	431.124	426.407	0.783604	0.472127	0.627865	428.765	0.628722	AF041858	synaptojanin 2	0016311 // dephosphorylation // inferred from electronic annotation	0005737 // cytoplasm // inferred from electronic annotation /// 0016020 // membrane // inferred from electronic annotation	0003676 // nucleic acid binding // inferred from electronic annotation /// 0003723 // RNA binding // inferred from electronic annotation /// 0004437 // inositol or phosphatidylinositol phosphatase activity // traceable author statement /// 0004437 // inositol or phosphatidylinositol phosphatase activity // inferred from electronic annotation /// 0004439 // phosphatidylinositol-4,5-bisphosphate 5-…	mRNA_processing_binding_Reactome // GenMAPP
Akap13	0.011578	10554166	1443923	Akap13	96.0703	104.202	100.136	164.095	154.889	0.585455	0.672757	0.629106	159.492	0.627846	BB011550	A kinase (PRKA) anchor protein 13	0007242 // intracellular signaling cascade // inferred from electronic annotation /// 0035023 // regulation of Rho protein signal transduction // inferred from electronic annotation	0005622 // intracellular // inferred from electronic annotation	0005089 // Rho guanyl-nucleotide exchange factor activity // inferred from electronic annotation /// 0008270 // zinc ion binding // inferred from electronic annotation /// 0016301 // kinase activity // inferred from electronic annotation /// 0046872 // metal ion binding // inferred from electronic annotation	---
Mbd5	0.00244254	10471967	1456423	Mbd5	142.432	130.749	136.591	225.05	208.86	0.632891	0.626012	0.629452	216.955	0.62958	AV298746	methyl-CpG binding domain protein 5	---	0005634 // nucleus // inferred from electronic annotation	0003677 // DNA binding // inferred from electronic annotation	---
Rsad1	0.00040883	10390022	1437449	Rsad1	188.013	372.166	280.089	336.04	530.384	0.559495	0.701691	0.630593	433.212	0.646541	BB818348	radical S-adenosyl methionine domain containing 1	0006779 // porphyrin biosynthetic process // inferred from electronic annotation /// 0055114 // oxidation reduction // inferred from electronic annotation	0005737 // cytoplasm // inferred from electronic annotation /// 0005739 // mitochondrion // inferred from electronic annotation	0003824 // catalytic activity // inferred from electronic annotation /// 0004109 // coproporphyrinogen oxidase activity // inferred from electronic annotation /// 0005506 // iron ion binding // inferred from electronic annotation /// 0016491 // oxidoreductase activity // inferred from electronic annotation /// 0046872 // metal ion binding // inferred from electronic annotation /// 0051536 // iron…	---
Ywhab	0.0142182	10478424	1420878	Ywhab	175.628	313.986	244.807	366.267	400.125	0.479507	0.784718	0.632112	383.196	0.638854	NM_018753	tyrosine 3-monooxygenase/tryptophan 5-monooxygenase activation protein, beta polypeptide	0006605 // protein targeting // inferred from direct assay	0005737 // cytoplasm // inferred from electronic annotation /// 0042470 // melanosome // inferred from electronic annotation /// 0048471 // perinuclear region of cytoplasm // inferred from electronic annotation	0004497 // monooxygenase activity // inferred from electronic annotation /// 0005515 // protein binding // inferred from physical interaction /// 0019904 // protein domain specific binding // inferred from direct assay /// 0019904 // protein domain specific binding // inferred from electronic annotation	Calcium_regulation_in_cardiac_cells // GenMAPP /// Smooth_muscle_contraction // GenMAPP
Pdk4	0.00758419	10543017	1417273	Pdk4	12565.4	5472.93	9019.17	16942.1	10284.7	0.74167	0.532142	0.636906	13613.4	0.662522	NM_013743	pyruvate dehydrogenase kinase, isoenzyme 4	0005975 // carbohydrate metabolic process // inferred from electronic annotation /// 0006006 // glucose metabolic process // inferred from electronic annotation /// 0006086 // acetyl-CoA biosynthetic process from pyruvate // traceable author statement /// 0007165 // signal transduction // inferred from electronic annotation /// 0016310 // phosphorylation // inferred from electronic annotation ///…	0005739 // mitochondrion // inferred from direct assay /// 0005739 // mitochondrion // inferred from electronic annotation /// 0005743 // mitochondrial inner membrane // inferred from direct assay /// 0005759 // mitochondrial matrix // inferred from electronic annotation	0000155 // two-component sensor activity // inferred from electronic annotation /// 0004673 // protein histidine kinase activity // inferred from electronic annotation /// 0004712 // protein serine/threonine/tyrosine kinase activity // traceable author statement /// 0004740 // pyruvate dehydrogenase (acetyl-transferring) kinase activity // inferred from electronic annotation /// 0005524 // ATP bi…	Krebs-TCA_Cycle // GenMAPP
Zmym6	0.00150322	10508228	1438685	Zmym6	396.838	377.54	387.189	572.965	648.754	0.692604	0.581946	0.637275	610.86	0.633842	BB375580	zinc finger, MYM-type 6	---	0005634 // nucleus // inferred from electronic annotation	0008270 // zinc ion binding // inferred from electronic annotation	---
Fkbp5	0.0142182	10449452	1448231	Fkbp5	83.2259	205.713	144.469	126.455	326.752	0.658146	0.629568	0.643857	226.603	0.637542	U16959	FK506 binding protein 5	0006457 // protein folding // inferred from electronic annotation	0005634 // nucleus // inferred from electronic annotation /// 0005737 // cytoplasm // inferred from electronic annotation	0003755 // peptidyl-prolyl cis-trans isomerase activity // inferred from electronic annotation /// 0005488 // binding // inferred from electronic annotation /// 0005515 // protein binding // inferred from physical interaction /// 0005515 // protein binding // inferred from electronic annotation /// 0016853 // isomerase activity // inferred from electronic annotation	---
Zhx2	9.73e-06	10424213	1455210	Zhx2	658.123	996.037	827.08	1728.45	1096.37	0.380759	0.908485	0.644622	1412.41	0.585581	BQ174722	zinc fingers and homeoboxes 2	0000122 // negative regulation of transcription from RNA polymerase II promoter // inferred from mutant phenotype /// 0006350 // transcription // inferred from electronic annotation /// 0006355 // regulation of transcription, DNA-dependent // inferred from electronic annotation /// 0006357 // regulation of transcription from RNA polymerase II promoter // inferred from mutant phenotype /// 0006402…	0005622 // intracellular // inferred from electronic annotation /// 0005634 // nucleus // inferred from electronic annotation /// 0005634 // nucleus // inferred from sequence or structural similarity	0003677 // DNA binding // inferred from electronic annotation /// 0003700 // transcription factor activity // inferred from electronic annotation /// 0003700 // transcription factor activity // inferred from sequence or structural similarity /// 0005515 // protein binding // inferred from physical interaction /// 0005515 // protein binding // inferred from electronic annotation /// 0005515 // pro…	---
Sorl1	0.011578	10592535	1426258	Sorl1	1928.83	3810.09	2869.46	3793.05	4879.64	0.508518	0.780814	0.644666	4336.34	0.661724	BI648081	sortilin-related receptor, LDLR class A repeats-containing	0006629 // lipid metabolic process // inferred from electronic annotation /// 0006810 // transport // inferred from electronic annotation /// 0006869 // lipid transport // inferred from electronic annotation /// 0006897 // endocytosis // inferred from electronic annotation /// 0007275 // multicellular organismal development // inferred from electronic annotation /// 0008202 // steroid metabolic p…	0016020 // membrane // inferred from electronic annotation /// 0016021 // integral to membrane // inferred from electronic annotation	0004872 // receptor activity // inferred from electronic annotation /// 0005319 // lipid transporter activity // inferred from electronic annotation /// 0030169 // low-density lipoprotein binding // inferred from electronic annotation	---
Cys1	0.000536109	10399680	1419070	Cys1	184.767	410.172	297.47	256.092	714.907	0.721488	0.573742	0.647615	485.499	0.612709	BF466918	cystin 1	---	0005929 // cilium // inferred from electronic annotation /// 0005932 // microtubule basal body // inferred from direct assay /// 0035085 // cilium axoneme // inferred from direct assay /// 0042995 // cell projection // inferred from electronic annotation	---	---
Adnp2	0.000907061	10459912	1452002	Adnp2	88.2601	114.201	101.231	187.43	138.015	0.470896	0.827453	0.649174	162.723	0.622105	BC024969	ADNP homeobox 2	0006350 // transcription // inferred from electronic annotation /// 0006355 // regulation of transcription, DNA-dependent // inferred from electronic annotation	0005622 // intracellular // inferred from electronic annotation /// 0005634 // nucleus // inferred from electronic annotation	0003677 // DNA binding // inferred from electronic annotation /// 0003700 // transcription factor activity // inferred from electronic annotation /// 0008270 // zinc ion binding // inferred from electronic annotation /// 0043565 // sequence-specific DNA binding // inferred from electronic annotation /// 0046872 // metal ion binding // inferred from electronic annotation	---
Rps6ka2	0.0173912	10441565	1417542	Rps6ka2	5087.67	4940.06	5013.87	7121.37	8342.84	0.714423	0.592132	0.653278	7732.1	0.648448	BB737182	ribosomal protein S6 kinase, polypeptide 2	0000089 // mitotic metaphase // inferred from direct assay /// 0001556 // oocyte maturation // inferred from direct assay /// 0006468 // protein amino acid phosphorylation // inferred from direct assay /// 0006468 // protein amino acid phosphorylation // inferred from electronic annotation /// 0007243 // protein kinase cascade // inferred from electronic annotation /// 0018105 // peptidyl-serine …	0005634 // nucleus // inferred from electronic annotation /// 0005737 // cytoplasm // inferred from direct assay /// 0005819 // spindle // inferred from direct assay /// 0005840 // ribosome // inferred from electronic annotation	0000166 // nucleotide binding // inferred from electronic annotation /// 0000287 // magnesium ion binding // inferred from electronic annotation /// 0004672 // protein kinase activity // inferred from direct assay /// 0004672 // protein kinase activity // inferred from electronic annotation /// 0004674 // protein serine/threonine kinase activity // inferred from direct assay /// 0004674 // protei…	Ribosomal_Proteins // GenMAPP
Pgd	0.00939007	10518570	1423706	Pgd	251.067	274.855	262.961	360.251	450.568	0.696922	0.610018	0.65347	405.41	0.64863	BC014793	phosphogluconate dehydrogenase	0006098 // pentose-phosphate shunt // inferred from electronic annotation /// 0008152 // metabolic process // inferred from electronic annotation /// 0009051 // pentose-phosphate shunt, oxidative branch // inferred from electronic annotation /// 0019322 // pentose biosynthetic process // inferred from direct assay /// 0055114 // oxidation reduction // inferred from electronic annotation	---	0003824 // catalytic activity // inferred from electronic annotation /// 0004616 // phosphogluconate dehydrogenase (decarboxylating) activity // inferred from direct assay /// 0004616 // phosphogluconate dehydrogenase (decarboxylating) activity // inferred from electronic annotation /// 0005488 // binding // inferred from electronic annotation /// 0005515 // protein binding // inferred from elect…	Pentose_Phosphate_Pathway // GenMAPP
Mtus1	0.00389482	10578324	1436501	Mtus1	981.712	1547.27	1264.49	1674.74	2144.89	0.586188	0.721373	0.65378	1909.82	0.6621	BB747681	mitochondrial tumor suppressor 1	0007049 // cell cycle // inferred from electronic annotation	0005634 // nucleus // inferred from electronic annotation /// 0005739 // mitochondrion // inferred from electronic annotation /// 0005794 // Golgi apparatus // inferred from electronic annotation /// 0005886 // plasma membrane // inferred from electronic annotation /// 0016020 // membrane // inferred from electronic annotation	---	---
Arhgap1	0.00031003	10473965	1451309	Arhgap1	179.97	258.614	219.292	469.899	278.31	0.382998	0.929227	0.656113	374.105	0.586178	BC006592	Rho GTPase activating protein 1	0007165 // signal transduction // inferred from electronic annotation /// 0007264 // small GTPase mediated signal transduction // not recorded /// 0043087 // regulation of GTPase activity // inferred from direct assay	0001726 // ruffle // inferred from direct assay /// 0005622 // intracellular // inferred from electronic annotation /// 0005737 // cytoplasm // inferred from electronic annotation /// 0005886 // plasma membrane // inferred from direct assay	0005096 // GTPase activator activity // inferred from electronic annotation /// 0005100 // Rho GTPase activator activity // inferred from direct assay /// 0005100 // Rho GTPase activator activity // not recorded /// 0017124 // SH3 domain binding // inferred from electronic annotation /// 0030675 // Rac GTPase activator activity // inferred from direct assay	---
Sp1	0.00609984	10427214	1418180	Sp1	386.786	599.199	492.993	814.304	714.398	0.47499	0.838747	0.656868	764.351	0.644982	BG916549	trans-acting transcription factor 1	0001503 // ossification // inferred from genetic interaction /// 0001701 // in utero embryonic development // inferred from genetic interaction /// 0001829 // trophectodermal cell differentiation // inferred from genetic interaction /// 0001889 // liver development // inferred from genetic interaction /// 0001892 // embryonic placenta development // inferred from genetic interaction /// 0006350 /…	0005622 // intracellular // inferred from electronic annotation /// 0005634 // nucleus // inferred from direct assay /// 0005634 // nucleus // inferred from electronic annotation	0003676 // nucleic acid binding // inferred from electronic annotation /// 0003677 // DNA binding // inferred from direct assay /// 0003677 // DNA binding // inferred from sequence or structural similarity /// 0003677 // DNA binding // inferred from electronic annotation /// 0003690 // double-stranded DNA binding // inferred from direct assay /// 0003700 // transcription factor activity // inferr…	Smooth_muscle_contraction // GenMAPP
Musk	0.00488493	10505145	1450511	Musk	148.285	297.835	223.06	224.867	434.351	0.659436	0.6857	0.672568	329.609	0.676741	U37709	muscle, skeletal, receptor tyrosine kinase	0006355 // regulation of transcription, DNA-dependent // inferred from mutant phenotype /// 0006468 // protein amino acid phosphorylation // inferred from electronic annotation /// 0007528 // neuromuscular junction development // inferred from genetic interaction /// 0008582 // regulation of synaptic growth at neuromuscular junction // inferred from mutant phenotype /// 0043113 // receptor cluste…	0005886 // plasma membrane // inferred from direct assay /// 0005887 // integral to plasma membrane // traceable author statement /// 0016020 // membrane // inferred from electronic annotation /// 0016021 // integral to membrane // inferred from electronic annotation /// 0031594 // neuromuscular junction // inferred from direct assay	0000166 // nucleotide binding // inferred from electronic annotation /// 0004672 // protein kinase activity // inferred from electronic annotation /// 0004713 // protein tyrosine kinase activity // inferred from electronic annotation /// 0004714 // transmembrane receptor protein tyrosine kinase activity // traceable author statement /// 0004714 // transmembrane receptor protein tyrosine kinase ac…	---
Tab1	0.00939007	10425341	1426898	Map3k7ip1	107.763	100.471	104.117	176.968	136.459	0.60894	0.736272	0.672606	156.714	0.664377	AK009321	mitogen-activated protein kinase kinase kinase 7 interacting protein 1	0000185 // activation of MAPKKK activity // inferred from mutant phenotype /// 0001701 // in utero embryonic development // inferred from mutant phenotype /// 0003007 // heart morphogenesis // inferred from mutant phenotype /// 0007179 // transforming growth factor beta receptor signaling pathway // inferred from mutant phenotype /// 0030324 // lung development // inferred from mutant phenotype	---	0003824 // catalytic activity // inferred from electronic annotation /// 0019209 // kinase activator activity // inferred from mutant phenotype	---
Fam234a	0.0257197	10449266	1434387	Itfg3	589.317	743.423	666.37	867.181	1107.08	0.679578	0.671516	0.675547	987.132	0.675057	AV251853	integrin alpha FG-GAP repeat containing 3	---	0016020 // membrane // inferred from electronic annotation /// 0016021 // integral to membrane // inferred from electronic annotation	---	---
Usp10	0.0173912	10575961	1448230	Usp10	904.146	1118.94	1011.54	1444.25	1541.48	0.626031	0.72589	0.67596	1492.87	0.677586	NM_009462	ubiquitin specific peptidase 10	0006511 // ubiquitin-dependent protein catabolic process // inferred from electronic annotation	---	0004221 // ubiquitin thiolesterase activity // inferred from electronic annotation /// 0008233 // peptidase activity // inferred from electronic annotation /// 0008234 // cysteine-type peptidase activity // inferred from electronic annotation /// 0016787 // hydrolase activity // inferred from electronic annotation	---
Tmem2	0.00609984	10462005	1424711	Tmem2	351.048	471.052	411.05	533.332	670.595	0.658217	0.702439	0.680328	601.964	0.682849	BC019745	transmembrane protein 2	---	0016020 // membrane // inferred from electronic annotation /// 0016021 // integral to membrane // inferred from electronic annotation	---	---
2410002F23Rik	0.00117065	10502417	1460672	2410002F23Rik	89.753	161.101	125.427	168.673	194.42	0.532113	0.828624	0.680369	181.546	0.690882	BC016099	RIKEN cDNA 2410002F23 gene	---	---	---	---
Mitf	0.0211898	10540248	1422025	Mitf	77.2063	66.1738	71.6901	91.738	126.825	0.841595	0.521773	0.681684	109.282	0.656013	NM_008601	microphthalmia-associated transcription factor	0006350 // transcription // inferred from electronic annotation /// 0006355 // regulation of transcription, DNA-dependent // inferred from direct assay /// 0006355 // regulation of transcription, DNA-dependent // inferred from electronic annotation /// 0007275 // multicellular organismal development // inferred from electronic annotation /// 0007605 // sensory perception of sound // inferred from…	0005634 // nucleus // inferred by curator /// 0005634 // nucleus // inferred from direct assay /// 0005634 // nucleus // inferred from electronic annotation	0003677 // DNA binding // inferred from direct assay /// 0003677 // DNA binding // inferred from electronic annotation /// 0003682 // chromatin binding // inferred from direct assay /// 0003700 // transcription factor activity // inferred from direct assay /// 0003705 // RNA polymerase II transcription factor activity, enhancer binding // inferred from direct assay /// 0016563 // transcription ac…	---
Auts2	2.21e-06	10534168	1452379	Auts2	7.32714	74.5516	40.9393	15.8971	82.3626	0.460912	0.905163	0.683037	49.1298	0.833289	AK012475	autism susceptibility candidate 2	---	---	---	---
Ccnt2	0.00244254	10349442	1427088	Ccnt2	229.966	220.767	225.366	313.753	345.804	0.732952	0.638416	0.685684	329.779	0.683387	BI872151	cyclin T2	---	0005634 // nucleus // not recorded	0005515 // protein binding // not recorded	---
Jarid2	1.94e-05	10404848	1450710	Jarid2	105.612	212.922	159.267	308.248	206.553	0.342619	1.03083	0.686726	257.401	0.61875	NM_021878	jumonji, AT rich interactive domain 2	0000122 // negative regulation of transcription from RNA polymerase II promoter // inferred from genetic interaction /// 0001889 // liver development // inferred from mutant phenotype /// 0006350 // transcription // inferred from electronic annotation /// 0006355 // regulation of transcription, DNA-dependent // inferred from electronic annotation /// 0007275 // multicellular organismal developmen…	0005622 // intracellular // inferred from electronic annotation /// 0005634 // nucleus // inferred from direct assay /// 0005634 // nucleus // inferred from electronic annotation	0003677 // DNA binding // inferred from direct assay /// 0003677 // DNA binding // inferred from electronic annotation /// 0005515 // protein binding // inferred from physical interaction /// 0016564 // transcription repressor activity // inferred from direct assay	---
Pdlim3	9.73e-06	10571601	1449178	Pdlim3	11926.3	18361.6	15144	19994.1	23509.7	0.596493	0.781023	0.688758	21751.9	0.696214	NM_016798	PDZ and LIM domain 3	0007015 // actin filament organization // inferred from direct assay /// 0007507 // heart development // inferred from mutant phenotype /// 0007519 // skeletal muscle development // inferred from mutant phenotype	0005737 // cytoplasm // inferred from electronic annotation /// 0015629 // actin cytoskeleton // inferred from physical interaction /// 0030018 // Z disc // traceable author statement	0005515 // protein binding // traceable author statement /// 0005515 // protein binding // inferred from electronic annotation /// 0008092 // cytoskeletal protein binding // inferred from physical interaction /// 0008270 // zinc ion binding // inferred from electronic annotation /// 0008307 // structural constituent of muscle // inferred from direct assay /// 0008307 // structural constituent of …	---
9330159F19Rik	0.000907061	10362372	1458379	9330159F19Rik	658.814	300.008	479.411	865.447	476.807	0.761241	0.629203	0.695222	671.127	0.714337	BB079733	RIKEN cDNA 9330159F19 gene	---	---	---	---
Cbfa2t3	0.0142182	10582429	1418582	Cbfa2t3	368.423	328.421	348.422	510.05	490.777	0.722327	0.669186	0.695756	500.414	0.696268	NM_009824	core-binding factor, runt domain, alpha subunit 2, translocated to, 3 (human)	0006350 // transcription // inferred from electronic annotation /// 0006355 // regulation of transcription, DNA-dependent // inferred from electronic annotation /// 0030154 // cell differentiation // inferred from electronic annotation /// 0030851 // granulocyte differentiation // not recorded	0000139 // Golgi membrane // inferred from electronic annotation /// 0005622 // intracellular // inferred from direct assay /// 0005634 // nucleus // inferred from electronic annotation /// 0005794 // Golgi apparatus // inferred from electronic annotation /// 0016020 // membrane // inferred from electronic annotation	0003700 // transcription factor activity // inferred from electronic annotation /// 0008270 // zinc ion binding // inferred from electronic annotation /// 0046872 // metal ion binding // inferred from electronic annotation	---
Cdh5	0.00939007	10574438	1422047	Cdh5	74.0429	5.86735	39.9551	62.069	29.3223	1.19291	0.200099	0.696505	45.6957	0.874375	NM_009868	cadherin 5	0001955 // blood vessel maturation // inferred from mutant phenotype /// 0007155 // cell adhesion // inferred from electronic annotation /// 0007156 // homophilic cell adhesion // inferred from electronic annotation /// 0008285 // negative regulation of cell proliferation // inferred from genetic interaction /// 0016337 // cell-cell adhesion // inferred by curator	0005886 // plasma membrane // inferred from electronic annotation /// 0005911 // cell-cell junction // inferred from direct assay /// 0005923 // tight junction // inferred from direct assay /// 0016020 // membrane // inferred from electronic annotation /// 0016021 // integral to membrane // inferred from electronic annotation	0005509 // calcium ion binding // inferred from electronic annotation /// 0005515 // protein binding // inferred from physical interaction /// 0005515 // protein binding // inferred from electronic annotation /// 0019903 // protein phosphatase binding // inferred from physical interaction /// 0042153 // RPTP-like protein binding // inferred from physical interaction	---
Fzd7	2.72e-05	10346607	1450043	Fzd7	12.1918	13.3631	12.7774	23.0212	15.37	0.529589	0.869423	0.699506	19.1956	0.665643	NM_008057	frizzled homolog 7 (Drosophila)	0007165 // signal transduction // inferred from electronic annotation /// 0007166 // cell surface receptor linked signal transduction // inferred from electronic annotation /// 0007186 // G-protein coupled receptor protein signaling pathway // inferred from electronic annotation /// 0007275 // multicellular organismal development // inferred from electronic annotation /// 0016055 // Wnt receptor …	0016020 // membrane // inferred from electronic annotation /// 0016021 // integral to membrane // inferred from electronic annotation	0004871 // signal transducer activity // inferred from electronic annotation /// 0004872 // receptor activity // inferred from electronic annotation /// 0004888 // transmembrane receptor activity // inferred from electronic annotation /// 0004926 // non-G-protein coupled 7TM receptor activity // inferred from electronic annotation /// 0004930 // G-protein coupled receptor activity // inferred fro…	GPCRDB_Other // GenMAPP /// Wnt_Signaling // GenMAPP
Thrb	0.00150322	10412882	1422202	Thrb	51.7027	14.1145	32.9086	46.8291	47.4328	1.10407	0.297568	0.70082	47.131	0.698237	NM_009380	thyroid hormone receptor beta	0006350 // transcription // inferred from electronic annotation /// 0006355 // regulation of transcription, DNA-dependent // traceable author statement /// 0006355 // regulation of transcription, DNA-dependent // inferred from electronic annotation /// 0007605 // sensory perception of sound // inferred from mutant phenotype /// 0008016 // regulation of heart contraction // inferred from mutant ph…	0005634 // nucleus // traceable author statement /// 0005634 // nucleus // inferred from electronic annotation	0003677 // DNA binding // inferred from electronic annotation /// 0003690 // double-stranded DNA binding // inferred from electronic annotation /// 0003700 // transcription factor activity // traceable author statement /// 0003700 // transcription factor activity // inferred from electronic annotation /// 0003707 // steroid hormone receptor activity // inferred from electronic annotation /// 0004…	Nuclear_Receptors // GenMAPP
P4ha1	0.011578	10363350	1452094	P4ha1	772.021	1213.84	992.928	1643.98	1300.84	0.469605	0.933119	0.701362	1472.41	0.674357	AI314028	procollagen-proline, 2-oxoglutarate 4-dioxygenase (proline 4-hydroxylase), alpha 1 polypeptide	0018401 // peptidyl-proline hydroxylation to 4-hydroxy-L-proline // inferred from direct assay /// 0019538 // protein metabolic process // inferred from electronic annotation /// 0030199 // collagen fibril organization // inferred from mutant phenotype /// 0055114 // oxidation reduction // inferred from electronic annotation	0005783 // endoplasmic reticulum // inferred from electronic annotation /// 0005788 // endoplasmic reticulum lumen // inferred from electronic annotation	0004656 // procollagen-proline 4-dioxygenase activity // inferred from direct assay /// 0004656 // procollagen-proline 4-dioxygenase activity // inferred from mutant phenotype /// 0004656 // procollagen-proline 4-dioxygenase activity // inferred from electronic annotation /// 0005488 // binding // inferred from electronic annotation /// 0005506 // iron ion binding // inferred from electronic anno…	---
Otub2	1.49e-06	10397966	1417575	Otub2	443.522	383.11	413.316	637.998	537.826	0.695177	0.712331	0.703754	587.912	0.703023	AK006346	OTU domain, ubiquitin aldehyde binding 2	0006511 // ubiquitin-dependent protein catabolic process // inferred from electronic annotation /// 0006519 // cellular amino acid and derivative metabolic process // inferred from electronic annotation /// 0006519 // cellular amino acid and derivative metabolic process // inferred from sequence or structural similarity	---	0008233 // peptidase activity // inferred from electronic annotation /// 0008234 // cysteine-type peptidase activity // inferred from electronic annotation /// 0016289 // CoA hydrolase activity // inferred from electronic annotation /// 0016289 // CoA hydrolase activity // inferred from sequence or structural similarity /// 0016787 // hydrolase activity // inferred from electronic annotation	---
Rbm33	0.00939007	10520371	1453566	Prr8	210.123	261.593	235.858	375.755	307.947	0.559202	0.849474	0.704338	341.851	0.689943	AK014289	proline rich 8	---	---	0003676 // nucleic acid binding // inferred from electronic annotation	mRNA_processing_binding_Reactome // GenMAPP
Hsp90aa1	0.000130539	10378848	1438902	Hsp90aa1	4100.11	3278.4	3689.25	7050.68	3909.52	0.581519	0.838567	0.710043	5480.1	0.673209	C77287	heat shock protein 90, alpha (cytosolic), class A member 1	0006457 // protein folding // inferred from electronic annotation /// 0006809 // nitric oxide biosynthetic process // traceable author statement /// 0006950 // response to stress // inferred from electronic annotation /// 0006986 // response to unfolded protein // traceable author statement /// 0042026 // protein refolding // traceable author statement /// 0045429 // positive regulation of nitric…	0005622 // intracellular // inferred from direct assay /// 0005737 // cytoplasm // inferred from direct assay /// 0005737 // cytoplasm // inferred from electronic annotation /// 0005829 // cytosol // traceable author statement /// 0042470 // melanosome // inferred from electronic annotation	0000166 // nucleotide binding // inferred from electronic annotation /// 0005515 // protein binding // inferred from physical interaction /// 0005515 // protein binding // inferred from sequence or structural similarity /// 0005524 // ATP binding // inferred from electronic annotation /// 0030235 // nitric-oxide synthase regulator activity // inferred from direct assay /// 0030235 // nitric-oxide…	---
Med15	0.00389482	10438198	1448435	Med15	546.439	665.799	606.119	889.741	821.882	0.614156	0.810092	0.712124	855.811	0.70824	NM_033609	mediator complex subunit 15	0006350 // transcription // inferred from electronic annotation /// 0006355 // regulation of transcription, DNA-dependent // inferred from electronic annotation	0005634 // nucleus // inferred from electronic annotation /// 0005737 // cytoplasm // inferred from electronic annotation	0005515 // protein binding // inferred from electronic annotation	---
Fbxo30	0.00192078	10361748	1453136	Fbxo30	162.364	74.7714	118.568	198.849	121.66	0.816519	0.614595	0.715557	160.254	0.739872	AK006369	F-box protein 30	0006511 // ubiquitin-dependent protein catabolic process // inferred from electronic annotation	---	0008270 // zinc ion binding // inferred from electronic annotation /// 0046872 // metal ion binding // inferred from electronic annotation	---
Nop56	0.00150322	10476093	1426533	Nol5a	274.503	530.767	402.635	438.139	641.847	0.626522	0.826936	0.726729	539.993	0.74563	BF660256	nucleolar protein 5A	0042254 // ribosome biogenesis // inferred from electronic annotation	0005634 // nucleus // inferred from electronic annotation	---	---
Arhgap29	0.00309146	10495685	1444512	Arhgap29	17.0602	7.86885	12.4645	29.6744	8.91874	0.574915	0.882283	0.728599	19.2965	0.645946	AI643890	Rho GTPase activating protein 29	0007165 // signal transduction // inferred from electronic annotation /// 0007242 // intracellular signaling cascade // inferred from electronic annotation	0005622 // intracellular // inferred from electronic annotation	0005096 // GTPase activator activity // inferred from electronic annotation /// 0008270 // zinc ion binding // inferred from electronic annotation /// 0019992 // diacylglycerol binding // inferred from electronic annotation /// 0046872 // metal ion binding // inferred from electronic annotation	---
Dusp10	0.00040883	10352448	1417163	Dusp10	577.248	556.114	566.681	858.814	705.304	0.672146	0.788474	0.73031	782.059	0.724602	NM_022019	dual specificity phosphatase 10	0006470 // protein amino acid dephosphorylation // inferred from electronic annotation /// 0016311 // dephosphorylation // inferred from electronic annotation	0005634 // nucleus // inferred from electronic annotation /// 0005737 // cytoplasm // inferred from electronic annotation	0004721 // phosphoprotein phosphatase activity // inferred from electronic annotation /// 0004725 // protein tyrosine phosphatase activity // inferred from electronic annotation /// 0008138 // protein tyrosine/serine/threonine phosphatase activity // inferred from electronic annotation /// 0016787 // hydrolase activity // inferred from electronic annotation /// 0016791 // phosphatase activity // …	---
Fam20c	0.0173912	10526853	1417688	Fam20c	384.549	336.034	360.292	713.34	364.273	0.539083	0.922479	0.730781	538.806	0.668685	NM_030565	family with sequence similarity 20, member C	---	0005576 // extracellular region // inferred from electronic annotation	0005509 // calcium ion binding // inferred from electronic annotation	---
Grk2	0.00488493	10464704	1426249	Adrbk1	251.411	349.367	300.389	448.658	386.138	0.560361	0.904773	0.732567	417.398	0.71967	AF333028	adrenergic receptor kinase, beta 1	0002026 // regulation of the force of heart contraction // inferred from genetic interaction /// 0002029 // desensitization of G-protein coupled receptor protein signaling pathway // inferred from genetic interaction /// 0002029 // desensitization of G-protein coupled receptor protein signaling pathway // inferred from mutant phenotype /// 0003108 // negative regulation of the force of heart cont…	0005737 // cytoplasm // inferred from electronic annotation /// 0016020 // membrane // inferred from direct assay	0000166 // nucleotide binding // inferred from electronic annotation /// 0004672 // protein kinase activity // inferred from direct assay /// 0004672 // protein kinase activity // inferred from electronic annotation /// 0004674 // protein serine/threonine kinase activity // inferred from direct assay /// 0004674 // protein serine/threonine kinase activity // inferred from electronic annotation //…	---
Pisd-ps1	0.00244254	10373702	1434975	4933439C20Rik	757.479	852.539	805.009	1234.62	985.752	0.613535	0.864862	0.739198	1110.18	0.725114	AA673371	RIKEN cDNA 4933439C20 gene	0008654 // phospholipid biosynthetic process // inferred from electronic annotation	---	0004609 // phosphatidylserine decarboxylase activity // inferred from electronic annotation	---
Ky	9.96e-07	10588203	1440435	Ky	2555.7	4046.75	3301.23	4056.4	4753.19	0.630043	0.851375	0.740709	4404.79	0.749462	BB126077	kyphoscoliosis peptidase	0007517 // muscle development // inferred from mutant phenotype /// 0007528 // neuromuscular junction development // inferred from mutant phenotype	0005737 // cytoplasm // inferred from electronic annotation /// 0005856 // cytoskeleton // inferred from electronic annotation	0008233 // peptidase activity // inferred from electronic annotation /// 0016787 // hydrolase activity // inferred from electronic annotation	---
Ppp2r5a	0.00192078	10361104	1440189	Ppp2r5a	12.0518	4.1289	8.09035	11.3716	9.78949	1.05982	0.421769	0.740793	10.5805	0.764645	BE852777	protein phosphatase 2, regulatory subunit B (B56), alpha isoform	0007165 // signal transduction // inferred from electronic annotation	0000159 // protein phosphatase type 2A complex // inferred from electronic annotation /// 0005737 // cytoplasm // inferred from electronic annotation	0005515 // protein binding // inferred from electronic annotation /// 0008601 // protein phosphatase type 2A regulator activity // inferred from electronic annotation	---
Mat2a	0.00117065	10545417	1423667	Mat2a	7151.86	10162.8	8657.31	9767.18	13479.6	0.732234	0.753937	0.743085	11623.4	0.744818	BC003451	methionine adenosyltransferase II, alpha	0006556 // S-adenosylmethionine biosynthetic process // inferred from direct assay /// 0006730 // one-carbon compound metabolic process // inferred from electronic annotation /// 0007623 // circadian rhythm // inferred from electronic annotation /// 0009416 // response to light stimulus // inferred from electronic annotation /// 0009725 // response to hormone stimulus // inferred from electronic …	---	0000166 // nucleotide binding // inferred from electronic annotation /// 0000287 // magnesium ion binding // inferred from electronic annotation /// 0004478 // methionine adenosyltransferase activity // inferred from direct assay /// 0004478 // methionine adenosyltransferase activity // inferred from electronic annotation /// 0005515 // protein binding // inferred from physical interaction /// 00…	---
Adgrl2	0.011578	10502748	1434111	LOC100048050 /// Lphn2	465.35	409.262	437.306	553.011	631.945	0.841484	0.647623	0.744554	592.478	0.738097	BG966339	similar to calcium-independent alpha-latrotoxin receptor homolog 2 /// latrophilin 2	0007165 // signal transduction // inferred from electronic annotation /// 0007166 // cell surface receptor linked signal transduction // inferred from electronic annotation /// 0007186 // G-protein coupled receptor protein signaling pathway // inferred from electronic annotation /// 0007218 // neuropeptide signaling pathway // inferred from electronic annotation	0005886 // plasma membrane // inferred from electronic annotation /// 0016020 // membrane // inferred from electronic annotation /// 0016021 // integral to membrane // inferred from electronic annotation	0004871 // signal transducer activity // inferred from electronic annotation /// 0004872 // receptor activity // inferred from electronic annotation /// 0004888 // transmembrane receptor activity // inferred from electronic annotation /// 0004930 // G-protein coupled receptor activity // inferred from electronic annotation /// 0005529 // sugar binding // inferred from electronic annotation	---
Man2a1	0.0211898	10446376	1448647	Man2a1	618.427	1039.93	829.179	1041.6	1160.5	0.59373	0.896105	0.744918	1101.05	0.753081	NM_008549	mannosidase 2, alpha 1	0001701 // in utero embryonic development // inferred from genetic interaction /// 0001889 // liver development // inferred from genetic interaction /// 0005975 // carbohydrate metabolic process // inferred from electronic annotation /// 0006013 // mannose metabolic process // inferred from electronic annotation /// 0006491 // N-glycan processing // inferred from genetic interaction /// 0007005 /…	0000139 // Golgi membrane // inferred from direct assay /// 0000139 // Golgi membrane // inferred from electronic annotation /// 0005794 // Golgi apparatus // inferred from direct assay /// 0005794 // Golgi apparatus // inferred from electronic annotation /// 0016020 // membrane // inferred from electronic annotation /// 0016021 // integral to membrane // inferred from electronic annotation	0003824 // catalytic activity // inferred from electronic annotation /// 0004559 // alpha-mannosidase activity // inferred from electronic annotation /// 0004572 // mannosyl-oligosaccharide 1,3-1,6-alpha-mannosidase activity // inferred from electronic annotation /// 0008270 // zinc ion binding // inferred from electronic annotation /// 0015923 // mannosidase activity // inferred from direct assa…	---
Foxo1	0.00488493	10491962	1416981	Foxo1	408.882	1258.47	833.678	1052.46	1140.83	0.388501	1.10312	0.745811	1096.64	0.760208	AI462296	forkhead box O1	0001568 // blood vessel development // inferred from mutant phenotype /// 0006350 // transcription // inferred from electronic annotation /// 0006355 // regulation of transcription, DNA-dependent // inferred from direct assay /// 0006355 // regulation of transcription, DNA-dependent // inferred from electronic annotation /// 0006916 // anti-apoptosis // inferred from electronic annotation /// 000…	0005634 // nucleus // inferred from direct assay /// 0005634 // nucleus // inferred from electronic annotation /// 0005634 // nucleus // inferred from sequence or structural similarity /// 0005737 // cytoplasm // inferred from direct assay /// 0005737 // cytoplasm // inferred from electronic annotation /// 0005737 // cytoplasm // inferred from sequence or structural similarity	0003677 // DNA binding // inferred from direct assay /// 0003677 // DNA binding // inferred from electronic annotation /// 0003700 // transcription factor activity // inferred from direct assay /// 0003700 // transcription factor activity // inferred from electronic annotation /// 0005515 // protein binding // inferred from physical interaction /// 0005515 // protein binding // inferred from elec…	---
Uck2	0.0257197	10359851	1448604	Uck2	452.832	410.481	431.656	501.366	687.906	0.903196	0.596711	0.749953	594.636	0.725917	NM_030724	uridine-cytidine kinase 2	0008152 // metabolic process // inferred from electronic annotation	---	0000166 // nucleotide binding // inferred from electronic annotation /// 0004849 // uridine kinase activity // inferred from electronic annotation /// 0005524 // ATP binding // inferred from electronic annotation /// 0016301 // kinase activity // inferred from electronic annotation /// 0016740 // transferase activity // inferred from electronic annotation /// 0016773 // phosphotransferase activit…	---
Edem1	0.00150322	10540493	1451218	Edem1	290.097	313.504	301.801	376.028	430.233	0.771478	0.728684	0.750081	403.131	0.748642	BG064496	ER degradation enhancer, mannosidase alpha-like 1	0006986 // response to unfolded protein // inferred from electronic annotation /// 0030433 // ER-associated protein catabolic process // inferred from direct assay	0005783 // endoplasmic reticulum // inferred from electronic annotation /// 0005789 // endoplasmic reticulum membrane // inferred from electronic annotation /// 0016020 // membrane // inferred from electronic annotation /// 0016021 // integral to membrane // inferred from electronic annotation /// 0030176 // integral to endoplasmic reticulum membrane // inferred from direct assay	0004559 // alpha-mannosidase activity // inferred from direct assay /// 0004571 // mannosyl-oligosaccharide 1,2-alpha-mannosidase activity // inferred from electronic annotation /// 0005509 // calcium ion binding // inferred from electronic annotation /// 0005515 // protein binding // inferred from electronic annotation	---
Mettl13	0.0142182	10359506	1423761	5630401D24Rik	4.28329	48.0985	26.1909	16.3335	38.4329	0.262239	1.25149	0.756866	27.3832	0.956458	BC014872	RIKEN cDNA 5630401D24 gene	0008152 // metabolic process // inferred from electronic annotation	---	0008168 // methyltransferase activity // inferred from electronic annotation /// 0016740 // transferase activity // inferred from electronic annotation	---
Ypel2	2.21e-06	10389581	1453414	Ypel2	2.63651	39.4146	21.0256	14.8857	29.3272	0.177116	1.34396	0.760538	22.1065	0.951104	BB133023	yippee-like 2 (Drosophila)	---	0005634 // nucleus // inferred from electronic annotation	---	---
Akap2	0.00939007	10505132	1455870	Akap2 /// Palm2 /// Palm2-akap2	1707.79	1735.6	1721.69	2402.82	2137.2	0.710742	0.812093	0.761418	2270.01	0.758453	AI649048	A kinase (PRKA) anchor protein 2 /// paralemmin 2 /// Palm2-Akap2 protein	0007015 // actin filament organization // inferred from direct assay /// 0007178 // transmembrane receptor protein serine/threonine kinase signaling pathway // inferred from physical interaction /// 0008104 // protein localization // inferred from physical interaction /// 0008360 // regulation of cell shape // inferred from electronic annotation	0005886 // plasma membrane // inferred from electronic annotation /// 0016020 // membrane // inferred from electronic annotation	0005515 // protein binding // inferred from physical interaction /// 0016301 // kinase activity // inferred from electronic annotation /// 0051018 // protein kinase A binding // inferred from physical interaction	G_Protein_Signaling // GenMAPP
Leo1	0.000130539	10587211	1455293	Leo1	592.144	556.588	574.366	821.52	692.624	0.720791	0.803594	0.762192	757.072	0.758668	BG065311	Leo1, Paf1/RNA polymerase II complex component, homolog (S. cerevisiae)	0006350 // transcription // inferred from electronic annotation /// 0006355 // regulation of transcription, DNA-dependent // inferred from electronic annotation	0005634 // nucleus // inferred from electronic annotation	0005515 // protein binding // inferred from electronic annotation	---
Aff3	9.66e-05	10354111	1430435	Aff3	106.576	73.6358	90.1058	153.51	88.6734	0.694261	0.830416	0.762338	121.092	0.744113	AK014322	AF4/FMR2 family, member 3	0006350 // transcription // traceable author statement /// 0006350 // transcription // inferred from electronic annotation /// 0006355 // regulation of transcription, DNA-dependent // inferred from electronic annotation	0005634 // nucleus // inferred from electronic annotation	0003677 // DNA binding // inferred from electronic annotation /// 0003700 // transcription factor activity // traceable author statement	---
Fyn	0.00244254	10362596	1417558	Fyn	443.142	428.796	435.969	541.189	605.974	0.818831	0.707615	0.763223	573.582	0.760082	NM_008054	Fyn proto-oncogene	0001764 // neuron migration // inferred from genetic interaction /// 0001764 // neuron migration // inferred from mutant phenotype /// 0006468 // protein amino acid phosphorylation // inferred from mutant phenotype /// 0006468 // protein amino acid phosphorylation // inferred from electronic annotation /// 0007166 // cell surface receptor linked signal transduction // inferred from direct assay /…	0005886 // plasma membrane // inferred from electronic annotation /// 0016020 // membrane // inferred from electronic annotation	0000166 // nucleotide binding // inferred from electronic annotation /// 0004672 // protein kinase activity // inferred from direct assay /// 0004672 // protein kinase activity // inferred from electronic annotation /// 0004713 // protein tyrosine kinase activity // inferred from direct assay /// 0004713 // protein tyrosine kinase activity // inferred from electronic annotation /// 0004715 // non…	Integrin-mediated_cell_adhesion_KEGG // GenMAPP
Plekhm1	0.0211898	10391918	1454746	Plekhm1	490.225	518.838	504.532	685.537	633.705	0.715096	0.818738	0.766917	659.621	0.764881	BB528702	pleckstrin homology domain containing, family M (with RUN domain) member 1	0007242 // intracellular signaling cascade // inferred from electronic annotation	0005737 // cytoplasm // inferred from electronic annotation	0008270 // zinc ion binding // inferred from electronic annotation /// 0019992 // diacylglycerol binding // inferred from electronic annotation /// 0046872 // metal ion binding // inferred from electronic annotation	---
Zbp1	0.00939007	10490150	1419604	Zbp1	7.32539	20.9174	14.1214	52.155	14.9387	0.140454	1.40022	0.770336	33.5468	0.420945	NM_021394	Z-DNA binding protein 1	---	---	0003677 // DNA binding // inferred from electronic annotation /// 0003692 // left-handed Z-DNA binding // inferred from direct assay /// 0003723 // RNA binding // inferred from electronic annotation /// 0003726 // double-stranded RNA adenosine deaminase activity // inferred from electronic annotation	mRNA_processing_binding_Reactome // GenMAPP
Mmd	0.00309146	10380289	1423488	Mmd	1109.57	1385.58	1247.58	1758.76	1515.66	0.630881	0.914177	0.772529	1637.21	0.762013	BC021914	monocyte to macrophage differentiation-associated	0019835 // cytolysis // inferred from electronic annotation	0005764 // lysosome // inferred from electronic annotation /// 0005765 // lysosomal membrane // inferred from electronic annotation /// 0005768 // endosome // inferred from electronic annotation /// 0016020 // membrane // inferred from electronic annotation /// 0016021 // integral to membrane // inferred from electronic annotation /// 0031902 // late endosome membrane // inferred from electronic …	0004872 // receptor activity // inferred from electronic annotation	---
Lin9	0.011578	10352267	1443984	Lin9	34.8127	33.0775	33.9451	36.3111	56.3819	0.958732	0.586669	0.7727	46.3465	0.732419	BB241089	lin-9 homolog (C. elegans)	0006260 // DNA replication // inferred from electronic annotation /// 0007049 // cell cycle // inferred from electronic annotation /// 0045786 // negative regulation of cell cycle // inferred from electronic annotation	0005634 // nucleus // inferred from electronic annotation	---	---
Zbtb38	0.0257197	10595831	1438269	Zbtb38	7.3056	47.4892	27.3974	7.26781	87.7643	1.0052	0.541099	0.77315	47.516	0.576593	BB278987	zinc finger and BTB domain containing 38	0045944 // positive regulation of transcription from RNA polymerase II promoter // inferred from electronic annotation /// 0045944 // positive regulation of transcription from RNA polymerase II promoter // inferred from sequence or structural similarity	0005622 // intracellular // inferred from electronic annotation /// 0005634 // nucleus // inferred from electronic annotation /// 0005634 // nucleus // inferred from sequence or structural similarity	0003676 // nucleic acid binding // inferred from electronic annotation /// 0003700 // transcription factor activity // inferred from electronic annotation /// 0003700 // transcription factor activity // inferred from sequence or structural similarity /// 0005515 // protein binding // inferred from electronic annotation /// 0008270 // zinc ion binding // inferred from electronic annotation /// 004…	---
E4f1	0.00939007	10448563	1450464	E4f1	74.8703	146.778	110.824	143.022	143.381	0.523488	1.02369	0.773587	143.202	0.773901	NM_007893	E4F transcription factor 1	0001558 // regulation of cell growth // inferred from electronic annotation /// 0006260 // DNA replication // inferred from mutant phenotype /// 0006350 // transcription // inferred from electronic annotation /// 0006355 // regulation of transcription, DNA-dependent // inferred from electronic annotation /// 0006511 // ubiquitin-dependent protein catabolic process // inferred from electronic anno…	0005622 // intracellular // inferred from electronic annotation /// 0005634 // nucleus // inferred from direct assay /// 0005634 // nucleus // inferred from electronic annotation /// 0005737 // cytoplasm // inferred from electronic annotation /// 0005819 // spindle // inferred from direct assay	0003676 // nucleic acid binding // inferred from electronic annotation /// 0003677 // DNA binding // inferred from direct assay /// 0003677 // DNA binding // inferred from electronic annotation /// 0008270 // zinc ion binding // inferred from electronic annotation /// 0016874 // ligase activity // inferred from electronic annotation /// 0030528 // transcription regulator activity // traceable aut…	---
Nceh1	0.00192078	10491083	1435134	Aadacl1	65.3916	75.6123	70.5019	71.5086	119.462	0.914458	0.632941	0.773699	95.4852	0.738355	AV369935	arylacetamide deacetylase-like 1	0006470 // protein amino acid dephosphorylation // inferred from direct assay /// 0006805 // xenobiotic metabolic process // inferred from mutant phenotype /// 0008152 // metabolic process // inferred from electronic annotation /// 0016042 // lipid catabolic process // inferred from electronic annotation	0005783 // endoplasmic reticulum // inferred from electronic annotation /// 0005792 // microsome // inferred from electronic annotation /// 0016020 // membrane // inferred from direct assay /// 0016020 // membrane // inferred from electronic annotation /// 0016021 // integral to membrane // inferred from electronic annotation	0004091 // carboxylesterase activity // inferred from electronic annotation /// 0016787 // hydrolase activity // inferred from electronic annotation /// 0017171 // serine hydrolase activity // inferred from direct assay /// 0042301 // phosphate binding // inferred from direct assay	---
Cdc14a	7.11e-05	10501629	1436913	Cdc14a	593.922	826.278	710.1	873.894	947.414	0.679627	0.872139	0.775883	910.654	0.779769	BB479310	CDC14 cell division cycle 14 homolog A (S. cerevisiae)	0006470 // protein amino acid dephosphorylation // inferred from electronic annotation /// 0007049 // cell cycle // inferred from electronic annotation /// 0016311 // dephosphorylation // inferred from electronic annotation /// 0051301 // cell division // inferred from electronic annotation	0005634 // nucleus // inferred from electronic annotation /// 0005813 // centrosome // inferred from electronic annotation /// 0005819 // spindle // inferred from electronic annotation	0004721 // phosphoprotein phosphatase activity // inferred from electronic annotation /// 0004725 // protein tyrosine phosphatase activity // inferred from electronic annotation /// 0008138 // protein tyrosine/serine/threonine phosphatase activity // inferred from electronic annotation /// 0016787 // hydrolase activity // inferred from electronic annotation /// 0016791 // phosphatase activity // …	---
Tbc1d31	7.11e-05	10424221	1444689	Wdr67	8.66886	7.22217	7.94551	10.2622	10.214	0.844737	0.707089	0.775913	10.2381	0.776075	BM240057	WD repeat domain 67	0032313 // regulation of Rab GTPase activity // inferred from electronic annotation	0005622 // intracellular // inferred from electronic annotation	0005097 // Rab GTPase activator activity // inferred from electronic annotation	---
Edn1	0.00609984	10404783	1451924	Edn1	175.672	155.32	165.496	159.162	335.466	1.10373	0.462998	0.783364	247.314	0.669174	D43775	endothelin 1	0001501 // skeletal system development // inferred from mutant phenotype /// 0001569 // patterning of blood vessels // inferred from mutant phenotype /// 0001666 // response to hypoxia // inferred from mutant phenotype /// 0001701 // in utero embryonic development // inferred from mutant phenotype /// 0006885 // regulation of pH // inferred from direct assay /// 0007186 // G-protein coupled recep…	0005576 // extracellular region // inferred from electronic annotation /// 0005615 // extracellular space // inferred from direct assay /// 0005615 // extracellular space // inferred from electronic annotation /// 0005737 // cytoplasm // inferred from electronic annotation	0005102 // receptor binding // inferred from direct assay /// 0005179 // hormone activity // inferred from electronic annotation /// 0005515 // protein binding // inferred from physical interaction /// 0031707 // endothelin A receptor binding // inferred from physical interaction /// 0031708 // endothelin B receptor binding // inferred from electronic annotation	Prostaglandin_synthesis_regulation // GenMAPP
Crcp	0.0257197	10526113	1418249	Crcp	370.301	364.854	367.577	428.359	517.709	0.864464	0.704747	0.784606	473.034	0.777063	NM_007761	calcitonin gene-related peptide-receptor component protein	0006350 // transcription // inferred from electronic annotation /// 0006383 // transcription from RNA polymerase III promoter // inferred from sequence or structural similarity /// 0007218 // neuropeptide signaling pathway // inferred from direct assay /// 0044237 // cellular metabolic process // inferred from electronic annotation	0001669 // acrosome // inferred from direct assay /// 0005634 // nucleus // inferred from electronic annotation /// 0005886 // plasma membrane // inferred from electronic annotation /// 0009360 // DNA polymerase III complex // inferred from sequence or structural similarity /// 0016020 // membrane // inferred from electronic annotation	0000166 // nucleotide binding // inferred from electronic annotation /// 0001635 // calcitonin gene-related polypeptide receptor activity // inferred from direct assay /// 0003824 // catalytic activity // inferred from electronic annotation /// 0003899 // DNA-directed RNA polymerase activity // inferred from electronic annotation /// 0003899 // DNA-directed RNA polymerase activity // inferred fro…	Smooth_muscle_contraction // GenMAPP
Usp54	0.00117065	10417912	1428731	Usp54	130.586	364.158	247.372	205.521	389.265	0.635391	0.935501	0.785446	297.393	0.831802	AK019588	ubiquitin specific peptidase 54	0006511 // ubiquitin-dependent protein catabolic process // inferred from electronic annotation /// 0006810 // transport // inferred from electronic annotation	0016020 // membrane // inferred from electronic annotation	0004221 // ubiquitin thiolesterase activity // inferred from electronic annotation /// 0005215 // transporter activity // inferred from electronic annotation	---
Pxdn	0.00939007	10395103	1428259	Pxdn	1034.81	886.268	960.538	1555.94	969.4	0.66507	0.914244	0.789657	1262.67	0.76072	AK010185	peroxidasin homolog (Drosophila)	0006979 // response to oxidative stress // inferred from electronic annotation /// 0042744 // hydrogen peroxide catabolic process // inferred from electronic annotation /// 0055114 // oxidation reduction // inferred from electronic annotation	0005576 // extracellular region // inferred from electronic annotation	0004601 // peroxidase activity // inferred from electronic annotation /// 0005506 // iron ion binding // inferred from electronic annotation /// 0005509 // calcium ion binding // inferred from electronic annotation /// 0005515 // protein binding // inferred from electronic annotation /// 0016491 // oxidoreductase activity // inferred from electronic annotation /// 0020037 // heme binding // infer…	---
Fkbp9	0.00939007	10538547	1423677	Fkbp9	1644.55	1716.12	1680.33	2011.34	2249.4	0.817635	0.762923	0.790279	2130.37	0.788751	AF279263	FK506 binding protein 9	0006457 // protein folding // inferred from direct assay /// 0006457 // protein folding // inferred from electronic annotation	0005783 // endoplasmic reticulum // inferred from direct assay /// 0005783 // endoplasmic reticulum // inferred from electronic annotation /// 0005788 // endoplasmic reticulum lumen // inferred from electronic annotation	0003755 // peptidyl-prolyl cis-trans isomerase activity // inferred from electronic annotation /// 0005509 // calcium ion binding // inferred from direct assay /// 0005509 // calcium ion binding // inferred from electronic annotation /// 0016853 // isomerase activity // inferred from electronic annotation	---
Fmnl1	0.000907061	10381708	1450212	Fmnl1	6.95632	73.0053	39.9808	58.5603	49.6634	0.118789	1.47	0.794396	54.1118	0.738856	NM_019679	formin-like 1	0006929 // substrate-bound cell migration // inferred from mutant phenotype /// 0009987 // cellular process // inferred from mutant phenotype /// 0016043 // cellular component organization // inferred from electronic annotation /// 0030036 // actin cytoskeleton organization // inferred from electronic annotation	0005737 // cytoplasm // inferred from electronic annotation /// 0005829 // cytosol // inferred from direct assay	0003779 // actin binding // inferred from electronic annotation /// 0005522 // profilin binding // inferred from direct assay /// 0017048 // Rho GTPase binding // inferred from electronic annotation	---
Eml4	0.00040883	10447141	1429612	Eml4	104.678	282.92	193.799	292.941	229.661	0.357335	1.2319	0.79462	261.301	0.741671	AK019611	echinoderm microtubule associated protein like 4	---	0005737 // cytoplasm // inferred from electronic annotation /// 0005874 // microtubule // inferred from electronic annotation	0005515 // protein binding // inferred from electronic annotation	---
Pag1	6.59e-07	10497237	1423002	Pag1	24.6959	11.3445	18.0202	28.6339	15.5128	0.862472	0.731301	0.796887	22.0733	0.81638	NM_053182	phosphoprotein associated with glycosphingolipid microdomains 1	0006955 // immune response // inferred from electronic annotation /// 0007242 // intracellular signaling cascade // traceable author statement /// 0007242 // intracellular signaling cascade // inferred from electronic annotation /// 0050863 // regulation of T cell activation // traceable author statement /// 0050868 // negative regulation of T cell activation // inferred from direct assay	0005886 // plasma membrane // traceable author statement /// 0005886 // plasma membrane // inferred from electronic annotation /// 0016020 // membrane // inferred from electronic annotation /// 0016021 // integral to membrane // inferred from electronic annotation /// 0045121 // membrane raft // traceable author statement /// 0045121 // membrane raft // inferred from electronic annotation	0005515 // protein binding // inferred from physical interaction /// 0005515 // protein binding // inferred from electronic annotation /// 0042169 // SH2 domain binding // inferred from electronic annotation	---
Atf7ip	5.2e-05	10542378	1449192	Atf7ip	160.782	259.221	210.002	272.147	257.797	0.590794	1.00552	0.798158	264.972	0.792543	NM_019426	activating transcription factor 7 interacting protein	0000122 // negative regulation of transcription from RNA polymerase II promoter // inferred from direct assay /// 0006306 // DNA methylation // inferred from electronic annotation /// 0006306 // DNA methylation // inferred from sequence or structural similarity /// 0006350 // transcription // inferred from electronic annotation /// 0006355 // regulation of transcription, DNA-dependent // inferred…	0005634 // nucleus // inferred from electronic annotation /// 0005634 // nucleus // inferred from sequence or structural similarity /// 0005667 // transcription factor complex // inferred from direct assay	0003714 // transcription corepressor activity // inferred from direct assay /// 0005515 // protein binding // inferred from electronic annotation /// 0005515 // protein binding // inferred from sequence or structural similarity /// 0016887 // ATPase activity // inferred from direct assay	---
4931406P16Rik	0.0257197	10562368	1433993	4931406P16Rik	1942.35	1979.54	1960.94	2634.96	2295.18	0.737147	0.862475	0.799811	2465.07	0.795492	BG067664	RIKEN cDNA 4931406P16 gene	---	---	---	---
Rnf144b	0.0173912	10404965	1425282	Rnf144b	36.0387	21.3334	28.686	27.3032	74.5241	1.31994	0.286262	0.803102	50.9137	0.563425	BC025007	ring finger protein 144B	0006511 // ubiquitin-dependent protein catabolic process // inferred from electronic annotation /// 0006915 // apoptosis // inferred from electronic annotation	0016020 // membrane // inferred from electronic annotation /// 0016021 // integral to membrane // inferred from electronic annotation	0005515 // protein binding // inferred from electronic annotation /// 0008270 // zinc ion binding // inferred from electronic annotation /// 0016874 // ligase activity // inferred from electronic annotation /// 0046872 // metal ion binding // inferred from electronic annotation	---
Chfr	0.0257197	10524105	1433550	Chfr	960.47	900.161	930.315	1227.22	1091.24	0.782641	0.824896	0.803768	1159.23	0.802529	AW553385	checkpoint with forkhead and ring finger domains	0000209 // protein polyubiquitination // inferred from direct assay /// 0000278 // mitotic cell cycle // inferred from mutant phenotype /// 0006511 // ubiquitin-dependent protein catabolic process // inferred from direct assay /// 0006511 // ubiquitin-dependent protein catabolic process // inferred from electronic annotation /// 0007049 // cell cycle // inferred from electronic annotation /// 000…	0005634 // nucleus // inferred from electronic annotation	0004842 // ubiquitin-protein ligase activity // inferred from mutant phenotype /// 0005515 // protein binding // inferred from physical interaction /// 0005515 // protein binding // inferred from electronic annotation /// 0008270 // zinc ion binding // inferred from electronic annotation /// 0016874 // ligase activity // inferred from electronic annotation /// 0046872 // metal ion binding // infe…	---
Tbcel	0.00150322	10592618	1454930	Tbcel	847.296	940.609	893.953	1126.61	1093.62	0.752074	0.860089	0.806082	1110.12	0.805279	BB540721	tubulin folding cofactor E-like	0006464 // protein modification process // inferred from electronic annotation	0005737 // cytoplasm // inferred from electronic annotation /// 0005856 // cytoskeleton // inferred from electronic annotation	0005515 // protein binding // inferred from electronic annotation	---
Proser1	0.00488493	10491977	1455524	2810046L04Rik	182.587	289.9	236.243	233.545	345.501	0.781806	0.839072	0.810439	289.523	0.815975	BB080131	RIKEN cDNA 2810046L04 gene	---	---	---	---
Slc9a2	0.011578	10345855	1437259	Slc9a2	1215.56	807.01	1011.28	1335.3	1125.88	0.910328	0.71678	0.813554	1230.59	0.821788	AV274006	solute carrier family 9 (sodium/hydrogen exchanger), member 2	0006814 // sodium ion transport // inferred from direct assay /// 0006814 // sodium ion transport // inferred from electronic annotation /// 0006885 // regulation of pH // inferred from direct assay /// 0006885 // regulation of pH // inferred from electronic annotation /// 0008104 // protein localization // inferred from mutant phenotype	0005903 // brush border // traceable author statement /// 0016021 // integral to membrane // inferred from electronic annotation	0015299 // solute:hydrogen antiporter activity // inferred from electronic annotation /// 0015385 // sodium:hydrogen antiporter activity // inferred from direct assay /// 0015385 // sodium:hydrogen antiporter activity // inferred from electronic annotation	---
Cpt1a	7.11e-05	10460157	1460409	Cpt1a	333.474	460.043	396.758	537.09	457.1	0.620889	1.00644	0.813663	497.095	0.798153	AI987925	carnitine palmitoyltransferase 1a, liver	0006006 // glucose metabolic process // inferred from electronic annotation /// 0006629 // lipid metabolic process // inferred from electronic annotation /// 0006631 // fatty acid metabolic process // inferred from electronic annotation /// 0006810 // transport // inferred from electronic annotation /// 0042755 // eating behavior // inferred from electronic annotation /// 0050796 // regulation of…	0005739 // mitochondrion // inferred from direct assay /// 0005739 // mitochondrion // inferred from electronic annotation /// 0005741 // mitochondrial outer membrane // inferred from electronic annotation /// 0005743 // mitochondrial inner membrane // inferred from direct assay /// 0005792 // microsome // inferred from electronic annotation /// 0016020 // membrane // inferred from electronic ann…	0004095 // carnitine O-palmitoyltransferase activity // inferred from electronic annotation /// 0008415 // acyltransferase activity // inferred from electronic annotation /// 0016740 // transferase activity // inferred from electronic annotation	Fatty_Acid_Degradation // GenMAPP /// Mitochondrial_fatty_acid_betaoxidation // GenMAPP
Zfp462	0.000130539	10505073	1439106	Zfp462	489.31	388.366	438.838	551.741	519.964	0.886847	0.74691	0.816879	535.852	0.818954	AV320128	zinc finger protein 462	0043392 // negative regulation of DNA binding // inferred from direct assay /// 0045944 // positive regulation of transcription from RNA polymerase II promoter // inferred from direct assay	0005622 // intracellular // inferred from electronic annotation /// 0005634 // nucleus // inferred from direct assay	0008270 // zinc ion binding // inferred from electronic annotation	---
Atp6v1a	0.00939007	10439566	1450634	Atp6v1a	812.465	662.144	737.304	987.321	815.076	0.822898	0.812371	0.817635	901.198	0.818138	NM_007508	ATPase, H+ transporting, lysosomal V1 subunit A	0006810 // transport // inferred from electronic annotation /// 0006811 // ion transport // inferred from electronic annotation /// 0015986 // ATP synthesis coupled proton transport // inferred from electronic annotation /// 0015992 // proton transport // inferred from electronic annotation /// 0046034 // ATP metabolic process // inferred from electronic annotation	0005739 // mitochondrion // inferred from direct assay /// 0016469 // proton-transporting two-sector ATPase complex // inferred from electronic annotation /// 0033178 // proton-transporting two-sector ATPase complex, catalytic domain // inferred from electronic annotation /// 0033180 // proton-transporting V-type ATPase, V1 domain // inferred from electronic annotation	0000166 // nucleotide binding // inferred from electronic annotation /// 0005524 // ATP binding // inferred from electronic annotation /// 0015078 // hydrogen ion transmembrane transporter activity // inferred from electronic annotation /// 0016787 // hydrolase activity // inferred from electronic annotation /// 0016820 // hydrolase activity, acting on acid anhydrides, catalyzing transmembrane mo…	---
Pxk	0.00023376	10412624	1451253	Pxk	412.534	691.756	552.145	562.903	760.162	0.732868	0.910011	0.82144	661.533	0.834645	BC016131	PX domain containing serine/threonine kinase	0006468 // protein amino acid phosphorylation // inferred from electronic annotation /// 0006954 // inflammatory response // inferred from electronic annotation /// 0007154 // cell communication // inferred from electronic annotation /// 0050804 // regulation of synaptic transmission // inferred from expression pattern	0005634 // nucleus // inferred from electronic annotation /// 0005737 // cytoplasm // inferred from direct assay /// 0005737 // cytoplasm // inferred from electronic annotation /// 0005737 // cytoplasm // inferred from sequence or structural similarity /// 0005886 // plasma membrane // inferred from direct assay /// 0005886 // plasma membrane // inferred from electronic annotation /// 0016020 // …	0003779 // actin binding // inferred from electronic annotation /// 0004672 // protein kinase activity // inferred from electronic annotation /// 0004713 // protein tyrosine kinase activity // inferred from electronic annotation /// 0005515 // protein binding // inferred from electronic annotation /// 0005524 // ATP binding // inferred from electronic annotation /// 0035091 // phosphoinositide bi…	---
Pard3	0.00150322	10576610	1420391	Pard3	2.4075	70.6503	36.5289	14.2133	47.8249	0.169384	1.47727	0.823327	31.0191	1.17763	NM_033620	par-3 (partitioning defective 3) homolog (C. elegans)	0007049 // cell cycle // inferred from electronic annotation /// 0007163 // establishment or maintenance of cell polarity // traceable author statement /// 0016337 // cell-cell adhesion // inferred by curator /// 0051301 // cell division // inferred from electronic annotation	0005737 // cytoplasm // inferred from direct assay /// 0005737 // cytoplasm // inferred from electronic annotation /// 0005819 // spindle // inferred from direct assay /// 0005912 // adherens junction // inferred from direct assay /// 0005913 // cell-cell adherens junction // inferred from direct assay /// 0005923 // tight junction // inferred from direct assay /// 0005923 // tight junction // in…	0005515 // protein binding // inferred from physical interaction /// 0005515 // protein binding // inferred from electronic annotation	---
Daam1	0.00488493	10396278	1431035	Daam1	44.7015	61.998	53.3498	77.2352	57.6121	0.578772	1.07613	0.82745	67.4236	0.791262	AW988556	dishevelled associated activator of morphogenesis 1	0016043 // cellular component organization // inferred from electronic annotation /// 0030036 // actin cytoskeleton organization // inferred from electronic annotation	0005737 // cytoplasm // inferred from electronic annotation	0003779 // actin binding // inferred from electronic annotation /// 0017048 // Rho GTPase binding // inferred from electronic annotation	---
Shisa2	5.2e-05	10415693	1423852	Shisa2	4096.25	3668.71	3882.48	5587.47	3970.5	0.733114	0.923991	0.828553	4778.98	0.812407	BC024118	shisa homolog 2 (Xenopus laevis)	0007275 // multicellular organismal development // inferred from electronic annotation	0005783 // endoplasmic reticulum // inferred from electronic annotation /// 0005789 // endoplasmic reticulum membrane // inferred from electronic annotation /// 0016020 // membrane // inferred from electronic annotation /// 0016021 // integral to membrane // inferred from electronic annotation	---	---
Hivep2	0.00150322	10361807	1422018	Hivep2	498.588	608.385	553.486	407.402	1367.33	1.22382	0.444945	0.834384	887.363	0.623742	NM_010437	human immunodeficiency virus type I enhancer binding protein 2	0006350 // transcription // traceable author statement /// 0006350 // transcription // inferred from electronic annotation /// 0006355 // regulation of transcription, DNA-dependent // inferred from electronic annotation /// 0007165 // signal transduction // traceable author statement	0005622 // intracellular // inferred from electronic annotation /// 0005634 // nucleus // inferred from electronic annotation /// 0005667 // transcription factor complex // traceable author statement	0003676 // nucleic acid binding // inferred from electronic annotation /// 0003677 // DNA binding // inferred from electronic annotation /// 0003700 // transcription factor activity // traceable author statement /// 0008270 // zinc ion binding // inferred from electronic annotation /// 0046872 // metal ion binding // traceable author statement /// 0046872 // metal ion binding // inferred from ele…	---
Gpatch1	0.00150322	10562439	1419013	Gpatch1	332.42	362.859	347.64	439.938	393.73	0.755606	0.921594	0.8386	416.834	0.834	NM_026181	G patch domain containing 1	---	0005622 // intracellular // inferred from electronic annotation	0003676 // nucleic acid binding // inferred from electronic annotation	---
Gsn	0.011578	10471655	1415812	Gsn	20349.8	21946.6	21148.2	25038.3	25383	0.812746	0.864617	0.838682	25210.7	0.838859	NM_010354	gelsolin	0016192 // vesicle-mediated transport // inferred from mutant phenotype /// 0030041 // actin filament polymerization // inferred from electronic annotation /// 0030041 // actin filament polymerization // inferred from sequence or structural similarity /// 0051014 // actin filament severing // inferred from electronic annotation /// 0051014 // actin filament severing // inferred from sequence or s…	0005576 // extracellular region // inferred from electronic annotation /// 0005576 // extracellular region // inferred from sequence or structural similarity /// 0005737 // cytoplasm // inferred from electronic annotation /// 0005829 // cytosol // inferred from electronic annotation /// 0005829 // cytosol // inferred from sequence or structural similarity /// 0005856 // cytoskeleton // inferred f…	0003779 // actin binding // inferred from electronic annotation /// 0005509 // calcium ion binding // inferred from electronic annotation /// 0005515 // protein binding // inferred from electronic annotation	---
Antxr2	0.00309146	10531560	1426708	Antxr2	1358.46	809.397	1083.93	1427.06	1113.62	0.951933	0.726819	0.839376	1270.34	0.853262	BC003908	anthrax toxin receptor 2	---	0016020 // membrane // inferred from electronic annotation /// 0016021 // integral to membrane // inferred from electronic annotation	0004872 // receptor activity // inferred from electronic annotation /// 0046872 // metal ion binding // inferred from electronic annotation	---
Tle1	0.000536109	10513884	1422751	Tle1	305.727	580.871	443.299	435.296	587.106	0.702343	0.989381	0.845862	511.201	0.867172	NM_011599	transducin-like enhancer of split 1, homolog of Drosophila E(spl)	0000122 // negative regulation of transcription from RNA polymerase II promoter // inferred from direct assay /// 0006350 // transcription // inferred from electronic annotation /// 0006355 // regulation of transcription, DNA-dependent // inferred from direct assay /// 0006355 // regulation of transcription, DNA-dependent // inferred from electronic annotation /// 0006357 // regulation of transcr…	0005634 // nucleus // inferred from direct assay /// 0005634 // nucleus // inferred from electronic annotation /// 0005667 // transcription factor complex // inferred from direct assay /// 0005737 // cytoplasm // inferred from electronic annotation	0003682 // chromatin binding // inferred from direct assay /// 0003714 // transcription corepressor activity // inferred from direct assay /// 0005515 // protein binding // inferred from physical interaction	---
Apex1	0.0173912	10414522	1416135	Apex1	1012.76	1876.31	1444.53	1566.06	1794.94	0.646693	1.04533	0.846012	1680.5	0.859586	NM_009687	apurinic/apyrimidinic endonuclease 1	0006281 // DNA repair // inferred from electronic annotation /// 0006974 // response to DNA damage stimulus // inferred from electronic annotation /// 0045454 // cell redox homeostasis // inferred from direct assay /// 0051101 // regulation of DNA binding // inferred from electronic annotation	0005622 // intracellular // inferred from electronic annotation /// 0005634 // nucleus // inferred from direct assay /// 0005634 // nucleus // inferred from electronic annotation /// 0005634 // nucleus // inferred from sequence or structural similarity /// 0005737 // cytoplasm // inferred from direct assay /// 0048471 // perinuclear region of cytoplasm // inferred from electronic annotation /// 0…	0000287 // magnesium ion binding // inferred from electronic annotation /// 0003677 // DNA binding // inferred from electronic annotation /// 0003677 // DNA binding // inferred from sequence or structural similarity /// 0003713 // transcription coactivator activity // inferred from electronic annotation /// 0003713 // transcription coactivator activity // inferred from sequence or structural simi…	---
Iws1	0.0211898	10454525	1453010	Iws1	479.422	451.037	465.229	600.569	504.15	0.79828	0.894647	0.846464	552.36	0.842258	AK006925	IWS1 homolog (S. cerevisiae)	---	0005634 // nucleus // inferred from electronic annotation	---	---
Eya1	0.00309146	10353192	1457424	Eya1	1563.84	1270.65	1417.25	1997.32	1396.29	0.782972	0.910024	0.846498	1696.8	0.835247	BB760085	eyes absent 1 homolog (Drosophila)	0001656 // metanephros development // inferred from mutant phenotype /// 0001657 // ureteric bud development // inferred from genetic interaction /// 0001658 // ureteric bud branching // inferred from genetic interaction /// 0006350 // transcription // inferred from electronic annotation /// 0006355 // regulation of transcription, DNA-dependent // inferred from electronic annotation /// 0006470 /…	0005634 // nucleus // inferred from direct assay /// 0005634 // nucleus // inferred from electronic annotation /// 0005737 // cytoplasm // inferred from direct assay /// 0005737 // cytoplasm // inferred from electronic annotation	0000287 // magnesium ion binding // inferred from electronic annotation /// 0003824 // catalytic activity // inferred from electronic annotation /// 0004721 // phosphoprotein phosphatase activity // inferred from electronic annotation /// 0004725 // protein tyrosine phosphatase activity // inferred from direct assay /// 0004725 // protein tyrosine phosphatase activity // inferred from electronic …	---
Casp8	0.00023376	10346564	1424552	Casp8	372.336	322.131	347.233	467.734	358.998	0.796042	0.897305	0.846673	413.366	0.840014	BC006737	caspase 8	0001525 // angiogenesis // inferred from mutant phenotype /// 0001841 // neural tube formation // inferred from mutant phenotype /// 0006508 // proteolysis // inferred from electronic annotation /// 0006915 // apoptosis // inferred from direct assay /// 0006915 // apoptosis // inferred from mutant phenotype /// 0006915 // apoptosis // inferred from electronic annotation /// 0007507 // heart devel…	0005634 // nucleus // inferred from direct assay /// 0005737 // cytoplasm // inferred from direct assay /// 0030690 // Noc1p-Noc2p complex // inferred from mutant phenotype	0004197 // cysteine-type endopeptidase activity // inferred from electronic annotation /// 0005515 // protein binding // inferred from physical interaction /// 0005515 // protein binding // inferred from electronic annotation /// 0008233 // peptidase activity // inferred from direct assay /// 0008233 // peptidase activity // inferred from mutant phenotype /// 0008233 // peptidase activity // infe…	Apoptosis // GenMAPP /// Apoptosis_GenMAPP // GenMAPP /// Apoptosis_KEGG // GenMAPP
Hist1h1e	0.00117065	10408212	1422398	Hist1h1e	2.77843	62.9326	32.8555	9.47838	44.864	0.293134	1.40274	0.847938	27.1712	1.2092	NM_015787	histone cluster 1, H1e	0006334 // nucleosome assembly // inferred from electronic annotation /// 0016584 // nucleosome positioning // inferred from mutant phenotype	0000786 // nucleosome // inferred from electronic annotation /// 0005634 // nucleus // inferred from electronic annotation /// 0005694 // chromosome // inferred from electronic annotation	0003677 // DNA binding // inferred from direct assay /// 0003677 // DNA binding // inferred from electronic annotation /// 0005515 // protein binding // inferred from physical interaction /// 0005515 // protein binding // inferred from electronic annotation	---
Gsr	0.0211898	10571274	1421817	Gsr	784.757	783.879	784.318	1003.47	853.831	0.782046	0.918073	0.85006	928.649	0.84458	AK019177	glutathione reductase	0006749 // glutathione metabolic process // inferred by curator /// 0006749 // glutathione metabolic process // inferred from electronic annotation /// 0045454 // cell redox homeostasis // inferred from electronic annotation /// 0055114 // oxidation reduction // inferred from electronic annotation	0005737 // cytoplasm // inferred from electronic annotation /// 0005739 // mitochondrion // inferred from direct assay /// 0005739 // mitochondrion // inferred from electronic annotation /// 0009897 // external side of plasma membrane // inferred from direct assay	0004362 // glutathione-disulfide reductase activity // inferred from direct assay /// 0004362 // glutathione-disulfide reductase activity // inferred from electronic annotation /// 0009055 // electron carrier activity // inferred from electronic annotation /// 0016491 // oxidoreductase activity // inferred from electronic annotation /// 0050660 // FAD binding // inferred from electronic annotatio…	---
Nfatc3	5.2e-05	10574962	1419976	Nfatc3	1231.48	1427.73	1329.6	1734.96	1440.08	0.709803	0.991427	0.850615	1587.52	0.837537	C79787	nuclear factor of activated T-cells, cytoplasmic, calcineurin-dependent 3	0006350 // transcription // inferred from electronic annotation /// 0006355 // regulation of transcription, DNA-dependent // inferred from direct assay /// 0006355 // regulation of transcription, DNA-dependent // inferred from mutant phenotype /// 0006355 // regulation of transcription, DNA-dependent // inferred from electronic annotation /// 0007507 // heart development // inferred from genetic …	0005634 // nucleus // inferred from direct assay /// 0005634 // nucleus // inferred from electronic annotation /// 0005737 // cytoplasm // inferred from direct assay /// 0005737 // cytoplasm // inferred from electronic annotation	0003677 // DNA binding // inferred from direct assay /// 0003677 // DNA binding // inferred from electronic annotation /// 0003700 // transcription factor activity // inferred from direct assay /// 0003700 // transcription factor activity // inferred from electronic annotation /// 0005515 // protein binding // inferred from physical interaction	---
Nfib	0.0142182	10514054	1427680	Nfib	3556.2	4764.18	4160.19	4311.56	5432.14	0.824805	0.877035	0.85092	4871.85	0.853923	Y07687	nuclear factor I/B	0006260 // DNA replication // inferred from electronic annotation /// 0006350 // transcription // inferred from electronic annotation /// 0006355 // regulation of transcription, DNA-dependent // inferred from electronic annotation /// 0008285 // negative regulation of cell proliferation // inferred from mutant phenotype /// 0030324 // lung development // inferred from mutant phenotype /// 0030900…	0005622 // intracellular // inferred from electronic annotation /// 0005634 // nucleus // inferred from electronic annotation	0003677 // DNA binding // inferred from electronic annotation /// 0003700 // transcription factor activity // inferred from electronic annotation /// 0016563 // transcription activator activity // inferred from direct assay	---
Aig1	0.00939007	10367973	1420679	Aig1	446.272	424.651	435.461	566.578	463.959	0.787661	0.915278	0.851469	515.269	0.845116	NM_025446	androgen-induced 1	---	0016020 // membrane // inferred from electronic annotation /// 0016021 // integral to membrane // inferred from electronic annotation	---	---
Stat5b	0.011578	10391286	1422102	Stat5b	209.558	125.521	167.539	189.535	209.245	1.10564	0.599873	0.852757	199.39	0.840258	BC024319	signal transducer and activator of transcription 5B	0000255 // allantoin metabolic process // inferred from mutant phenotype /// 0001553 // luteinization // inferred from genetic interaction /// 0001779 // natural killer cell differentiation // inferred from genetic interaction /// 0006101 // citrate metabolic process // inferred from mutant phenotype /// 0006103 // 2-oxoglutarate metabolic process // inferred from mutant phenotype /// 0006105 // …	0005634 // nucleus // inferred from direct assay /// 0005634 // nucleus // inferred from electronic annotation /// 0005737 // cytoplasm // inferred from direct assay /// 0005737 // cytoplasm // inferred from electronic annotation	0003677 // DNA binding // inferred from direct assay /// 0003677 // DNA binding // inferred from electronic annotation /// 0003700 // transcription factor activity // inferred from electronic annotation /// 0004871 // signal transducer activity // inferred from genetic interaction /// 0004871 // signal transducer activity // inferred from electronic annotation /// 0005509 // calcium ion binding /…	---
Sik2	0.00040883	10593430	1457276	Sik2	225.891	305.404	265.647	382.859	271.113	0.590011	1.12648	0.858247	326.986	0.812413	AI315692	salt inducible kinase 2	0006468 // protein amino acid phosphorylation // inferred from direct assay /// 0006468 // protein amino acid phosphorylation // inferred from electronic annotation /// 0007243 // protein kinase cascade // inferred from direct assay /// 0007243 // protein kinase cascade // inferred from electronic annotation /// 0008286 // insulin receptor signaling pathway // inferred from direct assay /// 00466…	0005634 // nucleus // inferred from direct assay /// 0005737 // cytoplasm // inferred from direct assay /// 0005737 // cytoplasm // inferred from electronic annotation	0000166 // nucleotide binding // inferred from electronic annotation /// 0000287 // magnesium ion binding // inferred from direct assay /// 0000287 // magnesium ion binding // inferred from electronic annotation /// 0004672 // protein kinase activity // inferred from electronic annotation /// 0004674 // protein serine/threonine kinase activity // inferred from direct assay /// 0004674 // protein …	---
Tmem45b	0.0173912	10592044	1424357	Tmem45b	823.82	531.972	677.896	853.166	703.35	0.965604	0.75634	0.860972	778.258	0.871043	BC026654	transmembrane protein 45b	---	0016020 // membrane // inferred from electronic annotation /// 0016021 // integral to membrane // inferred from electronic annotation	---	---
Birc3	1.94e-05	10590801	1425223	Birc3	28.035	28.1815	28.1083	27.7979	39.2929	1.00853	0.717216	0.862873	33.5454	0.837917	BC011338	baculoviral IAP repeat-containing 3	0006915 // apoptosis // inferred from electronic annotation /// 0042981 // regulation of apoptosis // inferred from electronic annotation	0005622 // intracellular // inferred from electronic annotation /// 0005634 // nucleus // inferred from electronic annotation /// 0005737 // cytoplasm // inferred from electronic annotation	0004842 // ubiquitin-protein ligase activity // inferred from electronic annotation /// 0005515 // protein binding // inferred from physical interaction /// 0005515 // protein binding // inferred from electronic annotation /// 0008270 // zinc ion binding // inferred from electronic annotation /// 0046872 // metal ion binding // inferred from electronic annotation	Apoptosis // GenMAPP /// Apoptosis_GenMAPP // GenMAPP
Supv3l1	0.00309146	10369586	1460557	Supv3l1	786.879	1114.39	950.635	938.993	1253.01	0.838003	0.889374	0.863688	1096	0.867368	AI452098	suppressor of var1, 3-like 1 (S. cerevisiae)	0032508 // DNA duplex unwinding // inferred from electronic annotation /// 0032508 // DNA duplex unwinding // inferred from sequence or structural similarity	0005634 // nucleus // inferred from electronic annotation /// 0005739 // mitochondrion // inferred from electronic annotation /// 0005759 // mitochondrial matrix // inferred from electronic annotation /// 0005759 // mitochondrial matrix // inferred from sequence or structural similarity	0000166 // nucleotide binding // inferred from electronic annotation /// 0003676 // nucleic acid binding // inferred from electronic annotation /// 0003677 // DNA binding // inferred from electronic annotation /// 0003677 // DNA binding // inferred from sequence or structural similarity /// 0003678 // DNA helicase activity // inferred from electronic annotation /// 0003678 // DNA helicase activit…	---
Gse1	0.00488493	10576010	1429653	Gse1	58.3944	61.8373	60.1159	71.5206	67.8693	0.81647	0.911124	0.863797	69.6949	0.862557	BE863648	genetic suppressor element 1	---	---	---	---
Snx20	0.00609984	10580504	1426299	Snx20	41.1358	120.563	80.8495	105.742	90.008	0.389022	1.33947	0.864248	97.8747	0.826051	AF395844	sorting nexin 20	0006810 // transport // inferred from electronic annotation /// 0007154 // cell communication // inferred from electronic annotation /// 0015031 // protein transport // inferred from electronic annotation	0005634 // nucleus // inferred from electronic annotation /// 0005737 // cytoplasm // inferred from electronic annotation /// 0005768 // endosome // inferred from electronic annotation /// 0005886 // plasma membrane // inferred from electronic annotation /// 0016020 // membrane // inferred from electronic annotation	0005515 // protein binding // inferred from electronic annotation /// 0035091 // phosphoinositide binding // inferred from electronic annotation	---
Ppargc1b	0.0142182	10459193	1449945	Ppargc1b	930.818	762.622	846.72	974.256	985.584	0.955415	0.773777	0.864596	979.92	0.864071	NM_133249	peroxisome proliferative activated receptor, gamma, coactivator 1 beta	0006350 // transcription // inferred from electronic annotation /// 0006355 // regulation of transcription, DNA-dependent // inferred from electronic annotation /// 0030520 // estrogen receptor signaling pathway // inferred from sequence or structural similarity /// 0045944 // positive regulation of transcription from RNA polymerase II promoter // inferred from sequence or structural similarity	0005634 // nucleus // inferred from electronic annotation /// 0005634 // nucleus // inferred from sequence or structural similarity	0000166 // nucleotide binding // inferred from electronic annotation /// 0003676 // nucleic acid binding // inferred from electronic annotation /// 0003723 // RNA binding // inferred from electronic annotation /// 0004872 // receptor activity // inferred from electronic annotation /// 0005515 // protein binding // inferred from physical interaction /// 0030374 // ligand-dependent nuclear receptor…	mRNA_processing_binding_Reactome // GenMAPP
Slc38a2	2.21e-06	10431894	1426722	Slc38a2	8877.89	8560.54	8719.22	11814.7	8727.11	0.751426	0.980914	0.86617	10270.9	0.848923	BM248527	solute carrier family 38, member 2	0006810 // transport // inferred from electronic annotation /// 0006811 // ion transport // inferred from electronic annotation /// 0006814 // sodium ion transport // inferred from electronic annotation /// 0006865 // amino acid transport // inferred from direct assay /// 0006865 // amino acid transport // inferred from electronic annotation	0005886 // plasma membrane // inferred from direct assay /// 0005886 // plasma membrane // inferred from electronic annotation /// 0016020 // membrane // inferred from electronic annotation /// 0016021 // integral to membrane // inferred from electronic annotation	0015171 // amino acid transmembrane transporter activity // inferred from direct assay /// 0015293 // symporter activity // inferred from electronic annotation /// 0031402 // sodium ion binding // inferred from electronic annotation	---
Ppat	0.00117065	10530806	1428543	Ppat	330.76	479.603	405.182	377.378	559.13	0.876469	0.857766	0.867118	468.254	0.865303	AV305746	phosphoribosyl pyrophosphate amidotransferase	0008152 // metabolic process // inferred from electronic annotation /// 0009113 // purine base biosynthetic process // inferred from electronic annotation /// 0009116 // nucleoside metabolic process // inferred from electronic annotation	---	0004044 // amidophosphoribosyltransferase activity // inferred from electronic annotation /// 0016740 // transferase activity // inferred from electronic annotation	---
Rcl1	3.24e-06	10462346	1416730	Rcl1	371.449	329.386	350.417	367.558	447.957	1.01059	0.735307	0.872947	407.757	0.859377	BC004574	RNA terminal phosphate cyclase-like 1	0006364 // rRNA processing // not recorded /// 0042254 // ribosome biogenesis // inferred from electronic annotation	0005634 // nucleus // inferred from electronic annotation /// 0005730 // nucleolus // inferred from direct assay	0003824 // catalytic activity // inferred from electronic annotation /// 0003963 // RNA-3'-phosphate cyclase activity // not recorded	---
Dapk1	9.83e-10	10405693	1426915	Dapk1	601.13	478.817	539.974	706.112	534.972	0.851324	0.895033	0.873179	620.542	0.870165	BC021490	death associated protein kinase 1	0006468 // protein amino acid phosphorylation // inferred from direct assay /// 0006468 // protein amino acid phosphorylation // inferred from electronic annotation /// 0006915 // apoptosis // inferred from electronic annotation /// 0006916 // anti-apoptosis // inferred from mutant phenotype /// 0007165 // signal transduction // inferred from electronic annotation /// 0007243 // protein kinase ca…	0005737 // cytoplasm // inferred from direct assay	0000166 // nucleotide binding // inferred from electronic annotation /// 0004672 // protein kinase activity // inferred from electronic annotation /// 0004674 // protein serine/threonine kinase activity // inferred from electronic annotation /// 0005515 // protein binding // inferred from electronic annotation /// 0005516 // calmodulin binding // inferred from direct assay /// 0005516 // calmodul…	---
Tcp11l2	0.00309146	10365344	1454646	Tcp11l2	2609.84	2897.22	2753.53	3103.09	3195.65	0.841045	0.906614	0.873829	3149.37	0.874311	BM245221	t-complex 11 (mouse) like 2	---	---	---	---
Zfp563	0.011578	10443926	1442648	Zfp563	168.569	100.606	134.587	167.267	134.94	1.00779	0.74556	0.876674	151.103	0.890699	BB457951	zinc finger protein 563	0006355 // regulation of transcription, DNA-dependent // inferred from electronic annotation	0005622 // intracellular // inferred from electronic annotation /// 0005634 // nucleus // inferred from electronic annotation	0003676 // nucleic acid binding // inferred from electronic annotation /// 0008270 // zinc ion binding // inferred from electronic annotation /// 0046872 // metal ion binding // inferred from electronic annotation	---
Tenm3	0.000907061	10578649	1449315	Odz3	419.244	341.275	380.26	362.438	561.362	1.15673	0.607941	0.882337	461.9	0.82325	NM_011857	odd Oz/ten-m homolog 3 (Drosophila)	0007165 // signal transduction // inferred from electronic annotation	0005887 // integral to plasma membrane // inferred from sequence or structural similarity /// 0016020 // membrane // inferred from electronic annotation /// 0016021 // integral to membrane // inferred from electronic annotation	---	---
Abcc9	0.00117065	10549108	1435751	Abcc9	4314.69	4263.75	4289.22	4610.89	5117.63	0.935761	0.833149	0.884455	4864.26	0.881783	BG791642	ATP-binding cassette, sub-family C (CFTR/MRP), member 9	0006810 // transport // inferred from electronic annotation /// 0006813 // potassium ion transport // inferred from electronic annotation /// 0051607 // defense response to virus // not recorded	0005886 // plasma membrane // inferred from direct assay /// 0016020 // membrane // inferred from electronic annotation /// 0016021 // integral to membrane // inferred from electronic annotation /// 0030017 // sarcomere // inferred from direct assay	0000166 // nucleotide binding // inferred from electronic annotation /// 0004872 // receptor activity // inferred from electronic annotation /// 0005524 // ATP binding // inferred from electronic annotation /// 0008281 // sulfonylurea receptor activity // inferred from electronic annotation /// 0016887 // ATPase activity // inferred from electronic annotation /// 0017111 // nucleoside-triphosphat…	---
Ralgapb	3.77e-05	10478077	1434656	B230339M05Rik	1108.86	1053.94	1081.4	1267.28	1177.08	0.874989	0.895386	0.885187	1222.18	0.884811	BE989070	RIKEN cDNA B230339M05 gene	0051056 // regulation of small GTPase mediated signal transduction // inferred from electronic annotation	0005622 // intracellular // inferred from electronic annotation	0005096 // GTPase activator activity // inferred from electronic annotation	---
Mrs2	0.0173912	10408348	1435548	Mrs2	213.081	262.404	237.743	267.528	268.98	0.796481	0.975554	0.886017	268.254	0.886259	BB015377	MRS2 magnesium homeostasis factor homolog (S. cerevisiae)	0006810 // transport // inferred from electronic annotation /// 0006811 // ion transport // inferred from electronic annotation /// 0030001 // metal ion transport // inferred from electronic annotation	0005739 // mitochondrion // inferred from electronic annotation /// 0005743 // mitochondrial inner membrane // inferred from electronic annotation /// 0016020 // membrane // inferred from electronic annotation /// 0016021 // integral to membrane // inferred from electronic annotation	0000287 // magnesium ion binding // inferred from electronic annotation /// 0046873 // metal ion transmembrane transporter activity // inferred from electronic annotation	---
Tet2	0.0173912	10502284	1455300	Tet2	542.927	349.286	446.107	521.549	473.332	1.04099	0.737931	0.88946	497.441	0.896804	AV381006	tet oncogene family member 2	---	---	---	---
Asph	0.00939007	10511446	1420959	Asph	344.25	573.546	458.898	503.192	522.082	0.684134	1.09858	0.891355	512.637	0.895172	NM_023066	aspartate-beta-hydroxylase	0007389 // pattern specification process // inferred from mutant phenotype /// 0008285 // negative regulation of cell proliferation // inferred from genetic interaction /// 0018193 // peptidyl-amino acid modification // inferred from electronic annotation /// 0035108 // limb morphogenesis // inferred from mutant phenotype /// 0042264 // peptidyl-aspartic acid hydroxylation // inferred from direct…	0005783 // endoplasmic reticulum // inferred from electronic annotation /// 0005789 // endoplasmic reticulum membrane // inferred from electronic annotation /// 0016020 // membrane // inferred from electronic annotation /// 0016021 // integral to membrane // inferred from sequence or structural similarity /// 0016021 // integral to membrane // inferred from electronic annotation /// 0030176 // in…	0004597 // peptide-aspartate beta-dioxygenase activity // inferred from sequence or structural similarity /// 0004597 // peptide-aspartate beta-dioxygenase activity // inferred from electronic annotation /// 0005488 // binding // inferred from electronic annotation /// 0005506 // iron ion binding // inferred from electronic annotation /// 0016491 // oxidoreductase activity // inferred from electr…	---
Parva	0.00389482	10556426	1431375	Parva	460.104	268.261	364.182	394.989	428.363	1.16485	0.626246	0.895549	411.676	0.884633	BI690209	parvin, alpha	0007155 // cell adhesion // inferred from direct assay /// 0007155 // cell adhesion // inferred from electronic annotation	0005634 // nucleus // inferred from direct assay /// 0005737 // cytoplasm // inferred from direct assay /// 0005737 // cytoplasm // inferred from electronic annotation /// 0005856 // cytoskeleton // inferred from electronic annotation /// 0005886 // plasma membrane // inferred from electronic annotation /// 0005925 // focal adhesion // inferred from direct assay /// 0016020 // membrane // inferre…	0003779 // actin binding // inferred from direct assay /// 0003779 // actin binding // inferred from electronic annotation /// 0005515 // protein binding // inferred from physical interaction /// 0005515 // protein binding // inferred from electronic annotation	---
Calm1	0.00488493	10397752	1433592	Calm1	10660.2	10874.4	10767.3	13709.8	10657.9	0.77756	1.02031	0.898936	12183.9	0.883735	AW543361	calmodulin 1	0007049 // cell cycle // inferred from direct assay /// 0043388 // positive regulation of DNA binding // inferred from direct assay	0005819 // spindle // inferred from electronic annotation	0005509 // calcium ion binding // traceable author statement /// 0005509 // calcium ion binding // inferred from electronic annotation /// 0005515 // protein binding // inferred from electronic annotation /// 0005515 // protein binding // inferred from physical interaction /// 0019904 // protein domain specific binding // inferred from electronic annotation /// 0031997 // N-terminal myristoylatio…	---
Ltbp1	0.00389482	10446928	1448870	Ltbp1	398.808	581.03	489.919	678.144	475.035	0.588087	1.22313	0.905609	576.59	0.849684	AF022889	latent transforming growth factor beta binding protein 1	0007179 // transforming growth factor beta receptor signaling pathway // traceable author statement	0005576 // extracellular region // inferred from electronic annotation /// 0005578 // proteinaceous extracellular matrix // inferred from direct assay	0005488 // binding // inferred from electronic annotation /// 0005509 // calcium ion binding // inferred from electronic annotation /// 0019838 // growth factor binding // inferred from electronic annotation	TGF_Beta_Signaling_Pathway // GenMAPP
Rab10os	0.00389482	10394144	1431818	1700012B15Rik	444.387	554.002	499.194	680.845	477.815	0.652699	1.15945	0.906074	579.33	0.861675	AK005891	RIKEN cDNA 1700012B15 gene	---	0005737 // cytoplasm // inferred from electronic annotation	---	---
Orm1	0.000536109	10505438	1451054	Orm1	453.787	373.596	413.691	478.684	432.13	0.947989	0.864543	0.906266	455.407	0.908399	BE628912	orosomucoid 1	0002682 // regulation of immune system process // inferred from electronic annotation /// 0006810 // transport // inferred from electronic annotation /// 0006953 // acute-phase response // inferred from electronic annotation	0005576 // extracellular region // inferred from electronic annotation /// 0005615 // extracellular space // inferred from electronic annotation	0005215 // transporter activity // inferred from electronic annotation /// 0005488 // binding // inferred from electronic annotation	---
Cldn12	0.00309146	10527965	1433782	Cldn12	521.646	871.004	696.325	767.184	767.955	0.679949	1.13419	0.907068	767.569	0.907182	AW554231	claudin 12	0016338 // calcium-independent cell-cell adhesion // inferred from sequence or structural similarity	0005886 // plasma membrane // inferred from electronic annotation /// 0005923 // tight junction // inferred from electronic annotation /// 0005923 // tight junction // inferred from sequence or structural similarity /// 0016020 // membrane // inferred from electronic annotation /// 0016021 // integral to membrane // inferred from electronic annotation /// 0030054 // cell junction // inferred from…	0005198 // structural molecule activity // inferred from electronic annotation /// 0005515 // protein binding // inferred from sequence or structural similarity /// 0042802 // identical protein binding // inferred from sequence or structural similarity	---
Itpr1	1.38e-05	10540408	1417279	Itpr1	3365.43	3636.91	3501.18	3991.91	3740.45	0.843065	0.972321	0.907693	3866.18	0.905591	NM_010585	inositol 1,4,5-triphosphate receptor 1	0006810 // transport // inferred from electronic annotation /// 0006811 // ion transport // inferred from electronic annotation /// 0006816 // calcium ion transport // inferred from direct assay /// 0006816 // calcium ion transport // inferred from electronic annotation /// 0009791 // post-embryonic development // inferred from mutant phenotype /// 0032469 // endoplasmic reticulum calcium ion hom…	0005635 // nuclear envelope // inferred from direct assay /// 0005637 // nuclear inner membrane // inferred from direct assay /// 0005730 // nucleolus // inferred from direct assay /// 0005737 // cytoplasm // inferred from direct assay /// 0005783 // endoplasmic reticulum // traceable author statement /// 0005783 // endoplasmic reticulum // inferred from electronic annotation /// 0005789 // endop…	0004872 // receptor activity // inferred from electronic annotation /// 0005216 // ion channel activity // inferred from electronic annotation /// 0005220 // inositol 1,4,5-triphosphate-sensitive calcium-release channel activity // inferred from electronic annotation /// 0005262 // calcium channel activity // inferred from electronic annotation /// 0005509 // calcium ion binding // inferred from …	Calcium_regulation_in_cardiac_cells // GenMAPP /// G_Protein_Signaling // GenMAPP /// Smooth_muscle_contraction // GenMAPP
Wee1	1.94e-05	10556266	1416773	Wee1	152.875	413.623	283.249	249.737	342.864	0.612147	1.20637	0.909261	296.3	0.955952	NM_009516	WEE 1 homolog (S. pombe)	0006468 // protein amino acid phosphorylation // inferred from electronic annotation /// 0007049 // cell cycle // inferred from electronic annotation /// 0007067 // mitosis // inferred from electronic annotation /// 0051301 // cell division // inferred from electronic annotation	0005634 // nucleus // inferred from electronic annotation	0000166 // nucleotide binding // inferred from electronic annotation /// 0000287 // magnesium ion binding // inferred from electronic annotation /// 0004672 // protein kinase activity // inferred from electronic annotation /// 0004674 // protein serine/threonine kinase activity // inferred from electronic annotation /// 0004713 // protein tyrosine kinase activity // inferred from electronic annot…	Cell_Cycle_KEGG // GenMAPP /// G1_to_S_cell_cycle_Reactome // GenMAPP
Pik3r1	2.21e-06	10411782	1425514	Pik3r1	253.139	384.726	318.933	270.521	435.557	0.935749	0.883295	0.909522	353.039	0.903392	M60651	phosphatidylinositol 3-kinase, regulatory subunit, polypeptide 1 (p85 alpha)	0001953 // negative regulation of cell-matrix adhesion // inferred from genetic interaction /// 0006468 // protein amino acid phosphorylation // inferred from direct assay /// 0007165 // signal transduction // inferred from electronic annotation /// 0008286 // insulin receptor signaling pathway // inferred from sequence or structural similarity /// 0030183 // B cell differentiation // inferred fr…	0005622 // intracellular // inferred from electronic annotation /// 0005737 // cytoplasm // inferred from direct assay /// 0005829 // cytosol // inferred from direct assay /// 0005942 // phosphoinositide 3-kinase complex // traceable author statement /// 0005942 // phosphoinositide 3-kinase complex // inferred from electronic annotation /// 0005943 // 1-phosphatidylinositol-4-phosphate 3-kinase, …	0005158 // insulin receptor binding // inferred from sequence or structural similarity /// 0005159 // insulin-like growth factor receptor binding // inferred from sequence or structural similarity /// 0005515 // protein binding // inferred from physical interaction /// 0005515 // protein binding // inferred from electronic annotation /// 0005515 // protein binding // inferred from sequence or str…	---
Cbl	1.94e-05	10592734	1455886	Cbl /// LOC100048010	101.228	87.7855	94.5069	128.006	85.326	0.79081	1.02882	0.909817	106.666	0.886008	BB385581	Casitas B-lineage lymphoma /// similar to Casitas B-lineage lymphoma	0006511 // ubiquitin-dependent protein catabolic process // inferred from electronic annotation /// 0007166 // cell surface receptor linked signal transduction // inferred from electronic annotation	0005634 // nucleus // inferred from electronic annotation /// 0005737 // cytoplasm // inferred from electronic annotation	0004871 // signal transducer activity // inferred from electronic annotation /// 0005509 // calcium ion binding // inferred from electronic annotation /// 0005515 // protein binding // inferred from physical interaction /// 0005515 // protein binding // inferred from electronic annotation /// 0008270 // zinc ion binding // inferred from electronic annotation /// 0016874 // ligase activity // infe…	---
Sde2	0.0211898	10352294	1436511	BC031781	583.727	699.572	641.65	846.828	615.775	0.689311	1.13608	0.912697	731.302	0.877408	BM935102	cDNA sequence BC031781	---	---	---	---
Bmpr1b	0.00939007	10502451	1422872	Bmpr1b	39.467	34.1533	36.8102	48.0063	33.1466	0.822121	1.03037	0.926246	40.5765	0.90718	NM_007560	bone morphogenetic protein receptor, type 1B	0001501 // skeletal system development // inferred from electronic annotation /// 0001502 // cartilage condensation // inferred from mutant phenotype /// 0001550 // ovarian cumulus expansion // inferred from mutant phenotype /// 0001654 // eye development // inferred from mutant phenotype /// 0006468 // protein amino acid phosphorylation // inferred from electronic annotation /// 0006703 // estro…	0016020 // membrane // inferred from electronic annotation /// 0016021 // integral to membrane // inferred from electronic annotation	0000166 // nucleotide binding // inferred from electronic annotation /// 0000287 // magnesium ion binding // inferred from electronic annotation /// 0004672 // protein kinase activity // inferred from electronic annotation /// 0004674 // protein serine/threonine kinase activity // inferred from electronic annotation /// 0004675 // transmembrane receptor protein serine/threonine kinase activity //…	Ovarian_Infertility_Genes // GenMAPP
Ercc5	0.0257197	10345981	1450935	Ercc5	560.95	781.148	671.049	828.819	659.984	0.676806	1.18359	0.930197	744.401	0.901461	BM198879	excision repair cross-complementing rodent repair deficiency, complementation group 5	0006281 // DNA repair // inferred from mutant phenotype /// 0006281 // DNA repair // inferred from electronic annotation /// 0006283 // transcription-coupled nucleotide-excision repair // inferred from electronic annotation /// 0006289 // nucleotide-excision repair // inferred from mutant phenotype /// 0006289 // nucleotide-excision repair // inferred from electronic annotation /// 0006295 // nuc…	0005634 // nucleus // inferred from electronic annotation /// 0005675 // holo TFIIH complex // inferred from electronic annotation	0000405 // bubble DNA binding // inferred from electronic annotation /// 0003677 // DNA binding // inferred from electronic annotation /// 0003690 // double-stranded DNA binding // inferred from electronic annotation /// 0003697 // single-stranded DNA binding // inferred from electronic annotation /// 0003824 // catalytic activity // inferred from electronic annotation /// 0004518 // nuclease act…	---
Large1	0.00488493	10579744	1417435	Large	2296.84	1554.55	1925.69	2197.04	1870.18	1.04542	0.831232	0.938327	2033.61	0.946934	BG261907	like-glycosyltransferase	0009101 // glycoprotein biosynthetic process // non-traceable author statement /// 0046716 // muscle maintenance // inferred from mutant phenotype /// 0046716 // muscle maintenance // inferred from sequence or structural similarity	0000139 // Golgi membrane // inferred from electronic annotation /// 0005794 // Golgi apparatus // inferred from electronic annotation /// 0016020 // membrane // inferred from electronic annotation /// 0016021 // integral to membrane // inferred from electronic annotation	0016740 // transferase activity // inferred from electronic annotation /// 0016757 // transferase activity, transferring glycosyl groups // non-traceable author statement /// 0016757 // transferase activity, transferring glycosyl groups // inferred from electronic annotation	---
Zfc3h1	0.011578	10366409	1454975	Zfc3h1	866.192	829.409	847.8	1118.25	752.389	0.774595	1.10237	0.938481	935.321	0.906428	BG075935	zinc finger, C3H1-type containing	0006396 // RNA processing // inferred from electronic annotation	0005622 // intracellular // inferred from electronic annotation	0005488 // binding // inferred from electronic annotation	---
4632415L05Rik	0.0173912	10490986	1419611	4632415L05Rik	87.0148	44.2725	65.6437	82.7916	53.3329	1.05101	0.830116	0.940563	68.0623	0.964465	BC023403	RIKEN cDNA 4632415L05 gene	---	---	---	---
Cd34	0.0173912	10352905	1416072	Cd34	1642.56	2533.06	2087.81	2274.42	2185.03	0.722188	1.15928	0.940734	2229.73	0.936353	NM_133654	CD34 antigen	0007155 // cell adhesion // inferred from electronic annotation /// 0050900 // leukocyte migration // inferred from mutant phenotype	0009897 // external side of plasma membrane // inferred from direct assay /// 0016020 // membrane // inferred from electronic annotation /// 0016021 // integral to membrane // inferred from electronic annotation	0005515 // protein binding // inferred from electronic annotation	---
Rhebl1	0.00488493	10432362	1451516	Rhebl1	128.939	233.69	181.315	255.306	169.397	0.505036	1.37954	0.942289	212.352	0.853841	BC016521	Ras homolog enriched in brain like 1	0007264 // small GTPase mediated signal transduction // inferred from electronic annotation	0005622 // intracellular // inferred from electronic annotation /// 0005737 // cytoplasm // inferred from electronic annotation /// 0005886 // plasma membrane // inferred from electronic annotation /// 0016020 // membrane // inferred from electronic annotation	0000166 // nucleotide binding // inferred from electronic annotation /// 0005525 // GTP binding // inferred from electronic annotation	---
Rev1	0.00758419	10354085	1422624	Rev1	994.494	1073.36	1033.93	1002.73	1181.68	0.991782	0.908332	0.950057	1092.21	0.946639	NM_019570	REV1 homolog (S. cerevisiae)	0006260 // DNA replication // inferred from electronic annotation /// 0006281 // DNA repair // inferred from electronic annotation /// 0006974 // response to DNA damage stimulus // inferred from electronic annotation /// 0009411 // response to UV // inferred from electronic annotation /// 0042276 // error-prone postreplication DNA repair // inferred from direct assay	0005622 // intracellular // inferred from electronic annotation /// 0005634 // nucleus // inferred from electronic annotation	0000287 // magnesium ion binding // inferred from electronic annotation /// 0003677 // DNA binding // inferred from electronic annotation /// 0003684 // damaged DNA binding // inferred from electronic annotation /// 0003887 // DNA-directed DNA polymerase activity // inferred from electronic annotation /// 0005515 // protein binding // inferred from electronic annotation /// 0005515 // protein bin…	---
Aqp4	0.00939007	10457614	1425382	Aqp4	173.872	341.697	257.785	232.568	296.166	0.747617	1.15374	0.950677	264.367	0.975101	U48399	aquaporin 4	0006810 // transport // inferred from electronic annotation /// 0006833 // water transport // traceable author statement /// 0030104 // water homeostasis // non-traceable author statement	0005887 // integral to plasma membrane // traceable author statement /// 0016020 // membrane // inferred from electronic annotation /// 0016021 // integral to membrane // inferred from electronic annotation /// 0016021 // integral to membrane // non-traceable author statement	0005215 // transporter activity // inferred from electronic annotation /// 0015250 // water channel activity // inferred from direct assay	---
Dph6	0.00939007	10486029	1426548	Atpbd4	686.255	599.802	643.028	688.647	658.045	0.996526	0.91149	0.954008	673.346	0.954974	BG070516	ATP binding domain 4	---	---	---	---
Gabrr2	0.0142182	10503856	1420735	Gabrr2	53.3882	62.9133	58.1507	61.071	60.7826	0.874199	1.03505	0.954626	60.9268	0.954436	AF024621	gamma-aminobutyric acid (GABA-C) receptor, subunit rho 2	0006810 // transport // inferred from electronic annotation /// 0006811 // ion transport // inferred from electronic annotation /// 0006821 // chloride transport // traceable author statement /// 0007214 // gamma-aminobutyric acid signaling pathway // inferred from mutant phenotype /// 0007601 // visual perception // inferred from mutant phenotype /// 0042462 // eye photoreceptor cell development…	0005886 // plasma membrane // inferred from electronic annotation /// 0016020 // membrane // inferred from electronic annotation /// 0016021 // integral to membrane // inferred from electronic annotation /// 0030054 // cell junction // inferred from electronic annotation /// 0030424 // axon // traceable author statement /// 0045202 // synapse // inferred from electronic annotation /// 0045211 // …	0004872 // receptor activity // inferred from electronic annotation /// 0004890 // GABA-A receptor activity // inferred from mutant phenotype /// 0004890 // GABA-A receptor activity // inferred from electronic annotation /// 0005216 // ion channel activity // inferred from electronic annotation /// 0005230 // extracellular ligand-gated ion channel activity // inferred from electronic annotation /…	---
Reep1	0.011578	10539017	1433509	Reep1	6351.49	7258.33	6804.91	7449.16	6758.08	0.852645	1.07402	0.963334	7103.62	0.95795	BQ174328	receptor accessory protein 1	0051205 // protein insertion into membrane // inferred from electronic annotation	0005737 // cytoplasm // inferred from electronic annotation /// 0005739 // mitochondrion // inferred from electronic annotation /// 0016020 // membrane // inferred from electronic annotation /// 0016021 // integral to membrane // inferred from electronic annotation /// 0031966 // mitochondrial membrane // inferred from electronic annotation	0031849 // olfactory receptor binding // inferred from electronic annotation	---
Invs	0.0211898	10504865	1419308	Invs	180.396	191.845	186.121	209.387	177.479	0.861547	1.08094	0.971246	193.433	0.962198	NM_010569	inversin	0001822 // kidney development // inferred from mutant phenotype /// 0007275 // multicellular organismal development // inferred from electronic annotation /// 0009791 // post-embryonic development // inferred from mutant phenotype /// 0016055 // Wnt receptor signaling pathway // inferred from electronic annotation /// 0031016 // pancreas development // inferred from mutant phenotype /// 0048513 /…	0005634 // nucleus // inferred from electronic annotation /// 0005737 // cytoplasm // inferred from electronic annotation /// 0005856 // cytoskeleton // inferred from electronic annotation /// 0005874 // microtubule // inferred from electronic annotation /// 0016020 // membrane // inferred from electronic annotation	0005516 // calmodulin binding // inferred from electronic annotation	---
Ptx3	0.0142182	10492448	1418666	Ptx3	842.798	1125.89	984.342	897.994	1113.06	0.938534	1.01153	0.975029	1005.53	0.978932	NM_008987	pentraxin related gene	0001878 // response to yeast // inferred from mutant phenotype /// 0008228 // opsonization // inferred from mutant phenotype /// 0045429 // positive regulation of nitric oxide biosynthetic process // inferred from mutant phenotype /// 0050766 // positive regulation of phagocytosis // inferred from mutant phenotype	0005576 // extracellular region // inferred from electronic annotation	0001872 // zymosan binding // inferred from mutant phenotype	---
Foxp2	0.00192078	10536444	1422014	Foxp2	65.8193	29.5623	47.6908	46.4087	54.6043	1.41825	0.541392	0.979823	50.5065	0.944251	AY079003	forkhead box P2	0000122 // negative regulation of transcription from RNA polymerase II promoter // inferred from direct assay /// 0002053 // positive regulation of mesenchymal cell proliferation // inferred from genetic interaction /// 0006350 // transcription // inferred from electronic annotation /// 0006355 // regulation of transcription, DNA-dependent // inferred from electronic annotation /// 0007519 // ske…	0005622 // intracellular // inferred from electronic annotation /// 0005634 // nucleus // inferred from electronic annotation	0003677 // DNA binding // inferred from direct assay /// 0003677 // DNA binding // inferred from electronic annotation /// 0003677 // DNA binding // inferred from sequence or structural similarity /// 0003700 // transcription factor activity // inferred from direct assay /// 0003700 // transcription factor activity // inferred from electronic annotation /// 0005515 // protein binding // inferred …	---
Ly6c2	0.00488493	10429573	1421571	LOC100041546 /// LOC100045833 /// Ly6c1 /// Ly6c2	5432.32	6531.02	5981.67	6011.64	6182.44	0.903634	1.05638	0.980009	6097.04	0.981078	NM_010741	similar to Lymphocyte antigen 6C precursor (Ly-6C) /// similar to Lymphocyte antigen 6C precursor (Ly-6C) /// lymphocyte antigen 6 complex, locus C1 /// lymphocyte antigen 6 complex, locus C2	---	0005886 // plasma membrane // inferred from electronic annotation /// 0009897 // external side of plasma membrane // inferred from direct assay /// 0016020 // membrane // inferred from electronic annotation /// 0031225 // anchored to membrane // inferred from electronic annotation	---	---
Chst3	0.011578	10369301	1460322	Chst3	44.543	12.1405	28.3417	32.2419	20.9827	1.38152	0.578596	0.98006	26.6123	1.06499	NM_016803	carbohydrate (chondroitin 6/keratan) sulfotransferase 3	0005975 // carbohydrate metabolic process // inferred from electronic annotation /// 0006790 // sulfur metabolic process // inferred from electronic annotation /// 0030206 // chondroitin sulfate biosynthetic process // inferred from electronic annotation	0000139 // Golgi membrane // inferred from electronic annotation /// 0005794 // Golgi apparatus // inferred from electronic annotation /// 0016020 // membrane // inferred from electronic annotation /// 0016021 // integral to membrane // inferred from electronic annotation	0008146 // sulfotransferase activity // inferred from electronic annotation /// 0008459 // chondroitin 6-sulfotransferase activity // inferred from electronic annotation /// 0016740 // transferase activity // inferred from electronic annotation /// 0034482 // chondroitin 2-O-sulfotransferase activity // inferred from electronic annotation	---
Rbm24	0.011578	10404904	1458624	Rbm24	114.38	6.86195	60.621	59.6754	147.396	1.9167	0.0465545	0.981629	103.536	0.585508	AW125876	RNA binding motif protein 24	---	---	0000166 // nucleotide binding // inferred from electronic annotation /// 0003676 // nucleic acid binding // inferred from electronic annotation	---
Arntl	1.47e-10	10556463	1425099	Arntl	1961.72	628.114	1294.92	2439.77	531.819	0.804061	1.18107	0.992564	1485.79	0.871533	BC011080	aryl hydrocarbon receptor nuclear translocator-like	0000060 // protein import into nucleus, translocation // inferred from direct assay /// 0000160 // two-component signal transduction system (phosphorelay) // inferred from electronic annotation /// 0006350 // transcription // inferred from electronic annotation /// 0006355 // regulation of transcription, DNA-dependent // inferred from direct assay /// 0006355 // regulation of transcription, DNA-d…	0005634 // nucleus // inferred from direct assay /// 0005634 // nucleus // inferred from electronic annotation /// 0005667 // transcription factor complex // inferred from direct assay /// 0005667 // transcription factor complex // not recorded	0000155 // two-component sensor activity // inferred from electronic annotation /// 0003677 // DNA binding // inferred from physical interaction /// 0003677 // DNA binding // not recorded /// 0003677 // DNA binding // inferred from electronic annotation /// 0003700 // transcription factor activity // inferred from direct assay /// 0003700 // transcription factor activity // not recorded /// 00037…	---
Rhbdd1	0.00438987	10347796	1423918	Rhbdd1	933.761	946.575	940.168	1134.83	811.894	0.822817	1.16589	0.994351	973.364	0.965896	BC005518	rhomboid domain containing 1	---	0016020 // membrane // inferred from electronic annotation /// 0016021 // integral to membrane // inferred from electronic annotation	0008233 // peptidase activity // inferred from electronic annotation /// 0008236 // serine-type peptidase activity // inferred from electronic annotation /// 0016787 // hydrolase activity // inferred from electronic annotation	---
Acad10	0.00192078	10533367	1429339	Acad10	92.9996	65.9634	79.4815	77.4433	81.9309	1.20087	0.805109	1.00299	79.6871	0.99742	AK010568	acyl-Coenzyme A dehydrogenase family, member 10	0008152 // metabolic process // inferred from electronic annotation	0005739 // mitochondrion // inferred from direct assay	0003824 // catalytic activity // inferred from electronic annotation /// 0003995 // acyl-CoA dehydrogenase activity // inferred from electronic annotation /// 0009055 // electron carrier activity // inferred from electronic annotation /// 0016491 // oxidoreductase activity // inferred from electronic annotation /// 0016627 // oxidoreductase activity, acting on the CH-CH group of donors // inferre…	---
Bcl7a	0.00040883	10525542	1428207	Bcl7a	420.151	657.586	538.868	474.203	583.975	0.886015	1.12605	1.00603	529.089	1.01848	AK014498	B-cell CLL/lymphoma 7A	---	---	---	---
Ostm1	0.00150322	10362829	1428334	Ostm1	2803.75	2984.26	2894	3109.78	2653.46	0.901594	1.12467	1.01313	2881.62	1.0043	AK004546	osteopetrosis associated transmembrane protein 1	0030316 // osteoclast differentiation // inferred from mutant phenotype	0005829 // cytosol // inferred from direct assay /// 0016020 // membrane // inferred from electronic annotation /// 0016021 // integral to membrane // inferred from electronic annotation	0005515 // protein binding // inferred from physical interaction	---
Rras2	0.0257197	10567043	1417398	Rras2	816.688	1215.79	1016.24	1135.78	929.822	0.719054	1.30755	1.0133	1032.8	0.983963	NM_025846	related RAS viral (r-ras) oncogene homolog 2	0007264 // small GTPase mediated signal transduction // inferred from electronic annotation /// 0007265 // Ras protein signal transduction // inferred from direct assay /// 0009987 // cellular process // inferred from direct assay /// 0009987 // cellular process // inferred from physical interaction /// 0030335 // positive regulation of cell migration // inferred from genetic interaction	0005622 // intracellular // inferred from direct assay /// 0005622 // intracellular // inferred from electronic annotation /// 0005886 // plasma membrane // inferred from electronic annotation /// 0016020 // membrane // inferred from electronic annotation	0000166 // nucleotide binding // inferred from electronic annotation /// 0005515 // protein binding // inferred from physical interaction /// 0005515 // protein binding // inferred from electronic annotation /// 0005525 // GTP binding // inferred from electronic annotation	---
Zfp148	0.00939007	10435237	1449068	Zfp148	712.759	888.686	800.722	885.312	726.708	0.805094	1.22289	1.01399	806.01	0.99344	X98096	zinc finger protein 148	0006350 // transcription // inferred from electronic annotation /// 0006355 // regulation of transcription, DNA-dependent // inferred from electronic annotation /// 0007276 // gamete generation // inferred from mutant phenotype /// 0045944 // positive regulation of transcription from RNA polymerase II promoter // inferred from direct assay	0005622 // intracellular // inferred from electronic annotation /// 0005634 // nucleus // inferred from direct assay /// 0005634 // nucleus // inferred from electronic annotation	0003676 // nucleic acid binding // inferred from electronic annotation /// 0003677 // DNA binding // inferred from direct assay /// 0003677 // DNA binding // inferred from electronic annotation /// 0003700 // transcription factor activity // inferred from direct assay /// 0008270 // zinc ion binding // inferred from electronic annotation /// 0046872 // metal ion binding // inferred from electroni…	---
Dennd3	0.011578	10424584	1435927	Dennd3	253.145	190.93	222.038	260.387	179.854	0.972187	1.06159	1.01689	220.121	1.00871	BI557237	DENN/MADD domain containing 3	---	---	---	---
Eif4g2	0.0211898	10566966	1428362	Eif4g2	15162.7	13879.5	14521.1	14712	13724	1.03063	1.01133	1.02098	14218	1.02131	AU015377	eukaryotic translation initiation factor 4, gamma 2	0006412 // translation // inferred from electronic annotation /// 0006417 // regulation of translation // inferred from electronic annotation /// 0006446 // regulation of translational initiation // inferred from direct assay /// 0006446 // regulation of translational initiation // inferred from sequence or structural similarity /// 0016070 // RNA metabolic process // inferred from electronic ann…	0005737 // cytoplasm // inferred from direct assay /// 0016281 // eukaryotic translation initiation factor 4F complex // inferred from sequence or structural similarity	0003743 // translation initiation factor activity // inferred from direct assay /// 0003743 // translation initiation factor activity // inferred from electronic annotation /// 0003743 // translation initiation factor activity // inferred from sequence or structural similarity /// 0005488 // binding // inferred from electronic annotation /// 0005515 // protein binding // inferred from physical in…	Circadian_Exercise // GenMAPP /// mRNA_processing_binding_Reactome // GenMAPP /// Translation_Factors // GenMAPP
Cd209a	0.00939007	10576784	1426172	Cd209a	253.481	267.838	260.659	297.485	224.836	0.852081	1.19126	1.02167	261.16	0.998082	AF374470	CD209a antigen	0006897 // endocytosis // inferred from electronic annotation	0016020 // membrane // inferred from electronic annotation /// 0016021 // integral to membrane // inferred from sequence or structural similarity /// 0016021 // integral to membrane // inferred from electronic annotation	0004872 // receptor activity // inferred from electronic annotation /// 0005488 // binding // inferred from electronic annotation /// 0005509 // calcium ion binding // inferred from electronic annotation /// 0005529 // sugar binding // inferred from sequence or structural similarity /// 0005529 // sugar binding // inferred from electronic annotation /// 0005537 // mannose binding // inferred from…	---
Bptf	0.0211898	10392300	1456615	Bptf	2006.69	1801.71	1904.2	1960.29	1740.56	1.02367	1.03513	1.0294	1850.42	1.02906	AA867746	bromodomain PHD finger transcription factor	0000122 // negative regulation of transcription from RNA polymerase II promoter // not recorded /// 0006338 // chromatin remodeling // inferred from sequence or structural similarity /// 0007420 // brain development // inferred from sequence or structural similarity /// 0045449 // regulation of transcription // inferred from sequence or structural similarity	0005634 // nucleus // inferred from sequence or structural similarity	0005515 // protein binding // inferred from electronic annotation /// 0008094 // DNA-dependent ATPase activity // inferred from sequence or structural similarity /// 0008134 // transcription factor binding // not recorded /// 0008270 // zinc ion binding // inferred from electronic annotation /// 0030528 // transcription regulator activity // inferred from sequence or structural similarity /// 004…	---
Ccbe1	7.11e-05	10459496	1445127	Ccbe1	20.7743	57.3773	39.0758	30.3676	41.7372	0.684096	1.37473	1.02941	36.0524	1.08386	AV225567	collagen and calcium binding EGF domains 1	---	0005576 // extracellular region // inferred from electronic annotation	0005509 // calcium ion binding // inferred from electronic annotation	---
Stk10	0.00389482	10375083	1417751	Stk10	456.175	535.966	496.07	503.913	462.178	0.905264	1.15965	1.03246	483.045	1.02696	NM_009288	serine/threonine kinase 10	0006468 // protein amino acid phosphorylation // inferred from electronic annotation	---	0000166 // nucleotide binding // inferred from electronic annotation /// 0004672 // protein kinase activity // inferred from electronic annotation /// 0004674 // protein serine/threonine kinase activity // traceable author statement /// 0004674 // protein serine/threonine kinase activity // inferred from electronic annotation /// 0005524 // ATP binding // inferred from electronic annotation /// 0…	---
Naaa	0.00192078	10531370	1452067	Naaa	622.503	548.365	585.434	647.495	495.355	0.961401	1.10701	1.03421	571.425	1.02452	BI106821	N-acylethanolamine acid amidase	0006629 // lipid metabolic process // inferred from electronic annotation	0005737 // cytoplasm // not recorded /// 0005764 // lysosome // inferred from electronic annotation	0016787 // hydrolase activity // inferred from electronic annotation	---
Pdzrn3	0.00939007	10546725	1416846	Pdzrn3	7513.99	5993.18	6753.59	6460.66	6612.46	1.16304	0.906347	1.03469	6536.56	1.0332	NM_018884	PDZ domain containing RING finger 3	---	---	0005515 // protein binding // inferred from electronic annotation /// 0008270 // zinc ion binding // inferred from electronic annotation /// 0046872 // metal ion binding // inferred from electronic annotation	---
Rnf145	0.000536109	10375343	1452769	Rnf145	1193.31	1700.16	1446.73	1346.36	1436.38	0.886322	1.18364	1.03498	1391.37	1.03979	AK014408	ring finger protein 145	---	0016020 // membrane // inferred from electronic annotation /// 0016021 // integral to membrane // inferred from electronic annotation	0005515 // protein binding // inferred from electronic annotation /// 0008270 // zinc ion binding // inferred from electronic annotation /// 0046872 // metal ion binding // inferred from electronic annotation	---
Acot1	0.0128981	10397148	1449065	Acot1 /// LOC100044830	48.4579	64.7666	56.6123	75.3791	45.0921	0.642857	1.43632	1.03959	60.2356	0.939848	NM_012006	acyl-CoA thioesterase 1 /// similar to acyl-CoA thioesterase	0001676 // long-chain fatty acid metabolic process // inferred from direct assay /// 0006629 // lipid metabolic process // inferred from electronic annotation /// 0006637 // acyl-CoA metabolic process // traceable author statement /// 0006637 // acyl-CoA metabolic process // inferred from electronic annotation	0005737 // cytoplasm // traceable author statement /// 0005737 // cytoplasm // inferred from electronic annotation	0004091 // carboxylesterase activity // inferred from electronic annotation /// 0016290 // palmitoyl-CoA hydrolase activity // inferred from electronic annotation /// 0016291 // acyl-CoA thioesterase activity // inferred from direct assay /// 0016291 // acyl-CoA thioesterase activity // traceable author statement /// 0016787 // hydrolase activity // inferred from electronic annotation /// 0016790…	---
Fam13c	0.0142182	10363868	1448557	Fam13c	1059.33	811.557	935.442	1051.6	756.626	1.00735	1.0726	1.03998	904.112	1.03465	NM_024244	family with sequence similarity 13, member C	---	---	---	---
Man1a	0.0211898	10369154	1417110	Man1a	502.797	600.758	551.778	561.889	503.769	0.894834	1.19253	1.04368	532.829	1.03556	BB070019	mannosidase 1, alpha	0008152 // metabolic process // inferred from electronic annotation	0000139 // Golgi membrane // inferred from direct assay /// 0000139 // Golgi membrane // inferred from electronic annotation /// 0005793 // ER-Golgi intermediate compartment // inferred from electronic annotation /// 0005794 // Golgi apparatus // inferred from electronic annotation /// 0016020 // membrane // inferred from electronic annotation /// 0016021 // integral to membrane // inferred from …	0004571 // mannosyl-oligosaccharide 1,2-alpha-mannosidase activity // inferred from electronic annotation /// 0005509 // calcium ion binding // inferred from electronic annotation /// 0016787 // hydrolase activity // inferred from electronic annotation /// 0016798 // hydrolase activity, acting on glycosyl bonds // inferred from electronic annotation /// 0046872 // metal ion binding // inferred fr…	---
Gpx1	0.0173912	10588899	1460671	Gpx1	4319.53	5043.25	4681.39	4799.81	4224.43	0.899937	1.19383	1.04688	4512.12	1.03751	BI219063	glutathione peroxidase 1	0000302 // response to reactive oxygen species // inferred from mutant phenotype /// 0001659 // temperature homeostasis // inferred from genetic interaction /// 0001836 // release of cytochrome c from mitochondria // inferred from electronic annotation /// 0001885 // endothelial cell development // inferred from mutant phenotype /// 0002862 // negative regulation of inflammatory response to antig…	0005737 // cytoplasm // inferred from electronic annotation /// 0005737 // cytoplasm // inferred from sequence or structural similarity /// 0005739 // mitochondrion // inferred from direct assay /// 0005739 // mitochondrion // inferred from mutant phenotype	0004601 // peroxidase activity // inferred from electronic annotation /// 0004602 // glutathione peroxidase activity // inferred from direct assay /// 0004602 // glutathione peroxidase activity // inferred from mutant phenotype /// 0004602 // glutathione peroxidase activity // inferred from electronic annotation /// 0008430 // selenium binding // inferred from electronic annotation /// 0008539 //…	---
Atg14	0.00758419	10419343	1426780	D14Ertd436e	656.237	462.15	559.194	601.982	457.258	1.09013	1.0107	1.05041	529.62	1.05584	AV247381	DNA segment, Chr 14, ERATO Doi 436, expressed	---	---	---	---
Ptpn4	6.8e-06	10357191	1421330	Ptpn4	170.199	96.6627	133.431	133.203	117.428	1.27774	0.823167	1.05045	125.316	1.06476	NM_019933	protein tyrosine phosphatase, non-receptor type 4	0006470 // protein amino acid dephosphorylation // inferred from electronic annotation /// 0016311 // dephosphorylation // inferred from electronic annotation	0005737 // cytoplasm // inferred from electronic annotation /// 0005856 // cytoskeleton // inferred from electronic annotation /// 0005886 // plasma membrane // inferred from electronic annotation /// 0016020 // membrane // inferred from electronic annotation /// 0019898 // extrinsic to membrane // inferred from electronic annotation	0004721 // phosphoprotein phosphatase activity // inferred from electronic annotation /// 0004725 // protein tyrosine phosphatase activity // inferred from electronic annotation /// 0004726 // non-membrane spanning protein tyrosine phosphatase activity // inferred from direct assay /// 0005488 // binding // inferred from electronic annotation /// 0005515 // protein binding // inferred from electr…	---
Anxa5	0.000175216	10497817	1425567	Anxa5	3907.11	2416.58	3161.84	3915.97	2188.27	0.997737	1.10433	1.05103	3052.12	1.03595	D63423	annexin A5	0007596 // blood coagulation // inferred from electronic annotation /// 0010033 // response to organic substance // inferred from direct assay /// 0050819 // negative regulation of coagulation // inferred from electronic annotation /// 0051260 // protein homooligomerization // inferred from electronic annotation	0005622 // intracellular // inferred from electronic annotation	0005509 // calcium ion binding // inferred from electronic annotation /// 0005515 // protein binding // inferred from electronic annotation /// 0005544 // calcium-dependent phospholipid binding // inferred from electronic annotation /// 0043499 // eukaryotic cell surface binding // inferred from direct assay	Prostaglandin_synthesis_regulation // GenMAPP
Litaf	0.00758419	10437687	1448294	100040872 /// ENSMUSG00000051848 /// Litaf	77.8549	71.2845	74.5697	89.1921	57.9122	0.87289	1.23091	1.0519	73.5522	1.01383	AV360881	predicted gene, 100040872 /// predicted gene, ENSMUSG00000051848 /// LPS-induced TN factor	0006350 // transcription // inferred from electronic annotation /// 0006355 // regulation of transcription, DNA-dependent // inferred from electronic annotation /// 0006915 // apoptosis // inferred from electronic annotation	0005764 // lysosome // inferred from electronic annotation /// 0005765 // lysosomal membrane // inferred from electronic annotation /// 0016020 // membrane // inferred from electronic annotation	0005515 // protein binding // inferred from physical interaction	---
Lrif1	0.0257197	10495173	1428162	4933421E11Rik	354.873	372.502	363.687	370.672	324.367	0.957375	1.1484	1.05289	347.52	1.04652	AK008209	RIKEN cDNA 4933421E11 gene	---	---	---	---
Grem2	0.000175216	10360415	1418492	Grem2	1012.03	1057.58	1034.81	1342.65	775.163	0.753753	1.36434	1.05905	1058.91	0.977239	NM_011825	gremlin 2 homolog, cysteine knot superfamily (Xenopus laevis)	---	0005576 // extracellular region // inferred from electronic annotation /// 0005615 // extracellular space // inferred from electronic annotation	0005125 // cytokine activity // inferred from electronic annotation	---
Cyp4v3	0.00939007	10578448	1417070	Cyp4v3	110.284	118.738	114.511	162.822	82.2296	0.677333	1.44398	1.06066	122.526	0.93459	NM_133969	cytochrome P450, family 4, subfamily v, polypeptide 3	0006508 // proteolysis // inferred from electronic annotation /// 0006954 // inflammatory response // inferred from electronic annotation /// 0007596 // blood coagulation // inferred from electronic annotation /// 0042730 // fibrinolysis // inferred from electronic annotation /// 0055114 // oxidation reduction // inferred from electronic annotation	0005576 // extracellular region // inferred from electronic annotation /// 0005783 // endoplasmic reticulum // inferred from electronic annotation /// 0005789 // endoplasmic reticulum membrane // inferred from electronic annotation /// 0016020 // membrane // inferred from electronic annotation /// 0016021 // integral to membrane // inferred from electronic annotation	0003824 // catalytic activity // inferred from electronic annotation /// 0004252 // serine-type endopeptidase activity // inferred from electronic annotation /// 0004497 // monooxygenase activity // inferred from electronic annotation /// 0005506 // iron ion binding // inferred from electronic annotation /// 0008233 // peptidase activity // inferred from electronic annotation /// 0008236 // serin…	---
Glt8d2	0.00939007	10371296	1429402	Glt8d2	85.0975	173.772	129.435	110.571	127.685	0.76962	1.36094	1.06528	119.128	1.08652	AK003894	glycosyltransferase 8 domain containing 2	---	0016020 // membrane // inferred from electronic annotation /// 0016021 // integral to membrane // inferred from electronic annotation	0016740 // transferase activity // inferred from electronic annotation /// 0016757 // transferase activity, transferring glycosyl groups // inferred from electronic annotation	---
Mex3c	0.00488493	10456579	1454612	Mex3c	1805.71	1576.43	1691.07	1635.04	1523.83	1.10439	1.03452	1.06945	1579.44	1.07068	BI656279	mex3 homolog C (C. elegans)	---	0005634 // nucleus // inferred from electronic annotation /// 0005737 // cytoplasm // inferred from electronic annotation	0003723 // RNA binding // inferred from electronic annotation /// 0005515 // protein binding // inferred from electronic annotation /// 0008270 // zinc ion binding // inferred from electronic annotation /// 0046872 // metal ion binding // inferred from electronic annotation	---
Adal	0.0257197	10475280	1428198	Adal	955.678	1256.02	1105.85	1146.73	956.295	0.833397	1.31343	1.07341	1051.51	1.05168	AK016299	adenosine deaminase-like	0009117 // nucleotide metabolic process // inferred from electronic annotation /// 0009168 // purine ribonucleoside monophosphate biosynthetic process // inferred from electronic annotation	---	0016787 // hydrolase activity // inferred from electronic annotation /// 0019239 // deaminase activity // inferred from electronic annotation	---
Skap2	0.0173912	10544732	1418895	Skap2	639.727	385.084	512.405	520.673	417.849	1.22865	0.921586	1.07512	469.261	1.09194	NM_018773	src family associated phosphoprotein 2	0008285 // negative regulation of cell proliferation // inferred from mutant phenotype /// 0042113 // B cell activation // inferred from electronic annotation	0005737 // cytoplasm // inferred from direct assay /// 0005737 // cytoplasm // inferred from electronic annotation /// 0005886 // plasma membrane // not recorded /// 0005886 // plasma membrane // inferred from electronic annotation	---	---
Snrk	0.00192078	10590445	1448864	Snrk	2757.83	3984.67	3371.25	3086.23	3164.86	0.893593	1.25904	1.07631	3125.54	1.07861	NM_133741	SNF related kinase	0006468 // protein amino acid phosphorylation // inferred from electronic annotation /// 0006468 // protein amino acid phosphorylation // inferred from sequence or structural similarity	0005634 // nucleus // inferred from electronic annotation /// 0005634 // nucleus // inferred from sequence or structural similarity	0000166 // nucleotide binding // inferred from electronic annotation /// 0000287 // magnesium ion binding // inferred from electronic annotation /// 0000287 // magnesium ion binding // inferred from sequence or structural similarity /// 0004672 // protein kinase activity // inferred from electronic annotation /// 0004674 // protein serine/threonine kinase activity // inferred from electronic anno…	---
Casz1	0.00389482	10510422	1453349	Casz1	94.3911	46.6967	70.5439	72.0152	55.3609	1.31071	0.843496	1.0771	63.688	1.10765	AK010559	castor homolog 1, zinc finger (Drosophila)	0006350 // transcription // inferred from electronic annotation /// 0006355 // regulation of transcription, DNA-dependent // inferred from electronic annotation	0005622 // intracellular // inferred from electronic annotation /// 0005634 // nucleus // inferred from electronic annotation	0003677 // DNA binding // inferred from electronic annotation /// 0008270 // zinc ion binding // inferred from electronic annotation /// 0046872 // metal ion binding // inferred from electronic annotation	---
Pde4b	2.72e-05	10506335	1422474	Pde4b	5303.11	5045.73	5174.42	6472.55	3763.27	0.819324	1.34079	1.08006	5117.91	1.01104	BM246564	phosphodiesterase 4B, cAMP specific	0006939 // smooth muscle contraction // inferred from mutant phenotype /// 0007165 // signal transduction // inferred from electronic annotation	---	0003824 // catalytic activity // inferred from electronic annotation /// 0004114 // 3',5'-cyclic-nucleotide phosphodiesterase activity // inferred from electronic annotation /// 0004115 // 3',5'-cyclic-AMP phosphodiesterase activity // inferred from sequence or structural similarity	Smooth_muscle_contraction // GenMAPP
Mme	0.0211898	10492355	1422975	Mme	110.379	94.6184	102.498	85.7825	108.155	1.28673	0.874842	1.08078	96.9686	1.05703	NM_008604	membrane metallo endopeptidase	0006508 // proteolysis // inferred from electronic annotation	0016020 // membrane // inferred from direct assay /// 0016020 // membrane // inferred from electronic annotation /// 0016021 // integral to membrane // inferred from electronic annotation	0004222 // metalloendopeptidase activity // inferred from electronic annotation /// 0008233 // peptidase activity // inferred from direct assay /// 0008233 // peptidase activity // inferred from electronic annotation /// 0008237 // metallopeptidase activity // inferred from electronic annotation /// 0008270 // zinc ion binding // inferred from electronic annotation /// 0016787 // hydrolase activi…	---
Fah	0.00244254	10565315	1417220	Fah	250.37	264.294	257.332	366.772	178.069	0.68263	1.48422	1.08343	272.421	0.944612	NM_010176	fumarylacetoacetate hydrolase	0006527 // arginine catabolic process // inferred from mutant phenotype /// 0006559 // L-phenylalanine catabolic process // inferred from electronic annotation /// 0006572 // tyrosine catabolic process // inferred from electronic annotation /// 0008152 // metabolic process // inferred from electronic annotation /// 0009072 // aromatic amino acid family metabolic process // inferred from electroni…	---	0000287 // magnesium ion binding // inferred from electronic annotation /// 0003824 // catalytic activity // inferred from electronic annotation /// 0004334 // fumarylacetoacetase activity // inferred from mutant phenotype /// 0004334 // fumarylacetoacetase activity // inferred from electronic annotation /// 0005509 // calcium ion binding // inferred from electronic annotation /// 0016787 // hydr…	---
Ppp2cb	0.00031003	10571266	1421823	LOC100044385 /// Ppp2cb	2053.53	2767.03	2410.28	2227.39	2213.35	0.921945	1.25016	1.08605	2220.37	1.08553	AI323685	similar to protein phosphatase 2a, catalytic subunit, beta isoform /// protein phosphatase 2 (formerly 2A), catalytic subunit, beta isoform	0010468 // regulation of gene expression // inferred from mutant phenotype /// 0042221 // response to chemical stimulus // inferred from mutant phenotype /// 0042542 // response to hydrogen peroxide // inferred from mutant phenotype /// 0043066 // negative regulation of apoptosis // inferred from mutant phenotype /// 0043161 // proteasomal ubiquitin-dependent protein catabolic process // inferred…	0000159 // protein phosphatase type 2A complex // inferred from direct assay /// 0005634 // nucleus // traceable author statement /// 0005737 // cytoplasm // inferred from direct assay /// 0005737 // cytoplasm // inferred from electronic annotation	0004721 // phosphoprotein phosphatase activity // inferred from electronic annotation /// 0005506 // iron ion binding // inferred from electronic annotation /// 0005515 // protein binding // inferred from physical interaction /// 0005515 // protein binding // inferred from electronic annotation /// 0016787 // hydrolase activity // inferred from electronic annotation /// 0030145 // manganese ion b…	Circadian_Exercise // GenMAPP /// Glycogen_Metabolism // GenMAPP
Tbc1d14	0.0257197	10529549	1420196	Tbc1d14	1093.96	889.651	991.804	1081.6	764.606	1.01142	1.16354	1.08748	923.104	1.07442	C77429	TBC1 domain family, member 14	0032313 // regulation of Rab GTPase activity // inferred from electronic annotation	0005622 // intracellular // inferred from electronic annotation	0000166 // nucleotide binding // inferred from electronic annotation /// 0005096 // GTPase activator activity // inferred from electronic annotation /// 0005097 // Rab GTPase activator activity // inferred from electronic annotation /// 0005524 // ATP binding // inferred from electronic annotation	---
Fam49a	1.79e-07	10394593	1431045	Fam49a	8.14563	25.7983	16.972	9.4795	19.4871	0.85929	1.32387	1.09158	14.4833	1.17183	BB629037	family with sequence similarity 49, member B	---	0005622 // intracellular // inferred from electronic annotation	---	---
Parp11	0.00939007	10542040	1434139	Parp11	193.484	147.226	170.355	112.011	313.118	1.72735	0.470194	1.09877	212.565	0.801425	BB026163	poly (ADP-ribose) polymerase family, member 11	---	0005634 // nucleus // inferred from electronic annotation	0003950 // NAD+ ADP-ribosyltransferase activity // inferred from electronic annotation /// 0016740 // transferase activity // inferred from electronic annotation /// 0016757 // transferase activity, transferring glycosyl groups // inferred from electronic annotation	---
Vwa8	0.00192078	10416588	1424904	1300010F03Rik	954.418	693.071	823.744	678.553	862.05	1.40655	0.80398	1.10526	770.301	1.06938	BC019143	RIKEN cDNA 1300010F03 gene	---	0005576 // extracellular region // inferred from electronic annotation /// 0005739 // mitochondrion // inferred from direct assay	0000166 // nucleotide binding // inferred from electronic annotation /// 0005524 // ATP binding // inferred from electronic annotation /// 0016887 // ATPase activity // inferred from electronic annotation /// 0017111 // nucleoside-triphosphatase activity // inferred from electronic annotation	---
Cdc14b	0.0257197	10410099	1437070	Cdc14b	461.124	443.021	452.073	453.07	371.097	1.01778	1.19381	1.1058	412.084	1.09704	BB224362	CDC14 cell division cycle 14 homolog B (S. cerevisiae)	0006470 // protein amino acid dephosphorylation // inferred from electronic annotation /// 0016311 // dephosphorylation // inferred from electronic annotation	0005634 // nucleus // inferred from electronic annotation	0004721 // phosphoprotein phosphatase activity // inferred from electronic annotation /// 0004725 // protein tyrosine phosphatase activity // inferred from electronic annotation /// 0008138 // protein tyrosine/serine/threonine phosphatase activity // inferred from electronic annotation /// 0016787 // hydrolase activity // inferred from electronic annotation /// 0016791 // phosphatase activity // …	---
Rftn1	0.00150322	10451710	1428696	Rftn1	762.73	792.818	777.774	792.414	627.682	0.962539	1.26309	1.11281	710.048	1.09538	AK009372	raftlin lipid raft linker 1	---	0005886 // plasma membrane // inferred from electronic annotation /// 0016020 // membrane // inferred from electronic annotation	---	---
Stim2	0.0142182	10521950	1434219	Stim2	2427.04	3035.83	2731.44	2403.28	2488.77	1.00989	1.21981	1.11485	2446.03	1.11668	BB004503	stromal interaction molecule 2	0006810 // transport // inferred from electronic annotation /// 0006811 // ion transport // inferred from electronic annotation /// 0006816 // calcium ion transport // inferred from electronic annotation /// 0032235 // negative regulation of calcium ion transport via store-operated calcium channel // inferred from sequence or structural similarity /// 0032235 // negative regulation of calcium ion…	0005783 // endoplasmic reticulum // inferred from electronic annotation /// 0005789 // endoplasmic reticulum membrane // inferred from electronic annotation /// 0016020 // membrane // inferred from electronic annotation /// 0016021 // integral to membrane // not recorded /// 0016021 // integral to membrane // inferred from electronic annotation	0005509 // calcium ion binding // inferred from electronic annotation /// 0005515 // protein binding // inferred from physical interaction /// 0005515 // protein binding // inferred from electronic annotation	---
Slc9a9	0.00244254	10587854	1433719	Slc9a9	122.463	93.1566	107.81	96.4018	96.0492	1.27034	0.969884	1.12011	96.2255	1.12039	AI854429	solute carrier family 9 (sodium/hydrogen exchanger), member 9	0006810 // transport // inferred from electronic annotation /// 0006811 // ion transport // inferred from electronic annotation /// 0006814 // sodium ion transport // inferred from electronic annotation /// 0006885 // regulation of pH // inferred from electronic annotation	0005768 // endosome // inferred from electronic annotation /// 0016020 // membrane // inferred from electronic annotation /// 0016021 // integral to membrane // inferred from electronic annotation /// 0031902 // late endosome membrane // inferred from electronic annotation /// 0055037 // recycling endosome // inferred from electronic annotation	0015297 // antiporter activity // inferred from electronic annotation /// 0015299 // solute:hydrogen antiporter activity // inferred from electronic annotation /// 0015385 // sodium:hydrogen antiporter activity // inferred from electronic annotation /// 0031402 // sodium ion binding // inferred from electronic annotation	---
Bcar3	1.38e-05	10495781	1415936	Bcar3	460.694	381.985	421.339	400.462	344.013	1.15041	1.11038	1.13039	372.237	1.13191	NM_013867	breast cancer anti-estrogen resistance 3	0007264 // small GTPase mediated signal transduction // inferred from electronic annotation	0005622 // intracellular // inferred from electronic annotation	0005085 // guanyl-nucleotide exchange factor activity // inferred from electronic annotation /// 0005515 // protein binding // inferred from electronic annotation	---
Zeb1	0.011578	10453678	1418926	Zeb1	5278.19	4806.2	5042.19	5138.86	3892.19	1.02711	1.23483	1.13097	4515.53	1.11663	NM_011546	zinc finger E-box binding homeobox 1	0000122 // negative regulation of transcription from RNA polymerase II promoter // inferred from mutant phenotype /// 0006350 // transcription // inferred from electronic annotation /// 0006355 // regulation of transcription, DNA-dependent // inferred from electronic annotation /// 0007389 // pattern specification process // inferred from mutant phenotype /// 0007417 // central nervous system dev…	0005622 // intracellular // inferred from electronic annotation /// 0005634 // nucleus // inferred from direct assay /// 0005634 // nucleus // inferred from electronic annotation /// 0005667 // transcription factor complex // inferred from direct assay	0003676 // nucleic acid binding // inferred from electronic annotation /// 0003677 // DNA binding // inferred from electronic annotation /// 0003682 // chromatin binding // inferred from direct assay /// 0003690 // double-stranded DNA binding // inferred from electronic annotation /// 0003700 // transcription factor activity // inferred from direct assay /// 0003700 // transcription factor activi…	---
Cpeb4	0.00758419	10375002	1420617	Cpeb4	6750.92	6984.27	6867.59	7171.78	5278.21	0.941318	1.32323	1.13227	6224.99	1.10323	NM_026252	cytoplasmic polyadenylation element binding protein 4	---	---	0000166 // nucleotide binding // inferred from electronic annotation /// 0003676 // nucleic acid binding // inferred from electronic annotation /// 0003723 // RNA binding // inferred from electronic annotation	mRNA_processing_binding_Reactome // GenMAPP
Nfxl1	0.00939007	10530467	1417145	Nfxl1	415.353	509.428	462.391	543.382	339.199	0.764385	1.50186	1.13312	441.291	1.04781	NM_133921	nuclear transcription factor, X-box binding-like 1	0006355 // regulation of transcription, DNA-dependent // inferred from electronic annotation	0005634 // nucleus // inferred from electronic annotation	0003700 // transcription factor activity // inferred from electronic annotation /// 0008270 // zinc ion binding // inferred from electronic annotation	---
Sash1	0.000699194	10367746	1448005	Sash1	3085.77	1737.83	2411.8	2532.82	1625	1.21832	1.06943	1.14388	2078.91	1.16013	BI658899	SAM and SH3 domain containing 1	0007049 // cell cycle // inferred from electronic annotation /// 0045786 // negative regulation of cell cycle // inferred from electronic annotation	---	---	---
Phldb2	0.0257197	10439710	1454862	Phldb2	1080.95	725.078	903.017	868.872	688.085	1.24409	1.05376	1.14893	778.478	1.15998	AV253284	pleckstrin homology-like domain, family B, member 2	---	0005737 // cytoplasm // inferred from electronic annotation /// 0016020 // membrane // inferred from electronic annotation	---	---
Maf	0.000699194	10581992	1456060	Maf	7380.1	7637.43	7508.77	6229.1	6853.58	1.18478	1.11437	1.14957	6541.34	1.14789	AV284857	avian musculoaponeurotic fibrosarcoma (v-maf) AS42 oncogene homolog	0001816 // cytokine production // inferred from direct assay /// 0002088 // lens development in camera-type eye // inferred from mutant phenotype /// 0006350 // transcription // inferred from electronic annotation /// 0006355 // regulation of transcription, DNA-dependent // inferred from electronic annotation /// 0032330 // regulation of chondrocyte differentiation // inferred from mutant phenoty…	0005634 // nucleus // inferred from direct assay /// 0005634 // nucleus // inferred from electronic annotation /// 0005737 // cytoplasm // inferred from direct assay	0003677 // DNA binding // inferred from direct assay /// 0003677 // DNA binding // inferred from electronic annotation /// 0003700 // transcription factor activity // inferred from electronic annotation /// 0005515 // protein binding // inferred from physical interaction /// 0043565 // sequence-specific DNA binding // inferred from direct assay /// 0043565 // sequence-specific DNA binding // infe…	---
Tor1aip2	0.011578	10350800	1435526	Tor1aip2	1312.32	1135.32	1223.82	1073.5	1054.18	1.22247	1.07697	1.14972	1063.84	1.15038	BM248600	torsin A interacting protein 2	---	0005783 // endoplasmic reticulum // inferred from direct assay /// 0005783 // endoplasmic reticulum // inferred from electronic annotation /// 0005789 // endoplasmic reticulum membrane // inferred from electronic annotation /// 0016020 // membrane // inferred from electronic annotation /// 0016021 // integral to membrane // inferred from electronic annotation	0005515 // protein binding // inferred from physical interaction /// 0005515 // protein binding // inferred from electronic annotation	---
Stat1	0.00609984	10346191	1420915	Stat1	270.857	333.977	302.417	278.842	250.143	0.971366	1.33515	1.15326	264.492	1.14339	AW214029	signal transducer and activator of transcription 1	0006350 // transcription // inferred from mutant phenotype /// 0006350 // transcription // inferred from electronic annotation /// 0006355 // regulation of transcription, DNA-dependent // inferred from electronic annotation /// 0007165 // signal transduction // inferred from electronic annotation /// 0019221 // cytokine-mediated signaling pathway // inferred from direct assay /// 0031663 // lipop…	0005634 // nucleus // inferred from direct assay /// 0005634 // nucleus // inferred from electronic annotation /// 0005737 // cytoplasm // inferred from direct assay /// 0005737 // cytoplasm // inferred from electronic annotation	0003677 // DNA binding // inferred from electronic annotation /// 0003700 // transcription factor activity // inferred from mutant phenotype /// 0003700 // transcription factor activity // inferred from electronic annotation /// 0004871 // signal transducer activity // inferred from electronic annotation /// 0005509 // calcium ion binding // inferred from electronic annotation /// 0005515 // prot…	TGF_Beta_Signaling_Pathway // GenMAPP
Cmtm6	0.000130539	10589929	1451114	Cmtm6	554.756	500.563	527.66	596.212	362.869	0.930468	1.37946	1.15496	479.54	1.10034	BC027248	CKLF-like MARVEL transmembrane domain containing 6	0006935 // chemotaxis // inferred from electronic annotation	0005615 // extracellular space // inferred from electronic annotation /// 0016020 // membrane // inferred from electronic annotation /// 0016021 // integral to membrane // inferred from electronic annotation	0005125 // cytokine activity // inferred from electronic annotation	---
Dnttip2	0.00758419	10495773	1427881	Dnttip2	1385.53	1437.11	1411.32	1345.77	1121.34	1.02954	1.2816	1.15557	1233.55	1.14411	AK016368	deoxynucleotidyltransferase, terminal, interacting protein 2	0006350 // transcription // inferred from electronic annotation /// 0006355 // regulation of transcription, DNA-dependent // inferred from electronic annotation	0005634 // nucleus // inferred from electronic annotation	---	---
Ttc30a1	0.000536109	10483824	1424012	Ttc30a1	231.702	230.634	231.168	246.759	165.895	0.938981	1.39023	1.16461	206.327	1.12039	BC004773	tetratricopeptide repeat domain 30A1	0030030 // cell projection organization // inferred from electronic annotation	0005929 // cilium // inferred from electronic annotation /// 0042995 // cell projection // inferred from electronic annotation	0005488 // binding // inferred from electronic annotation	---
Foxn2	0.00192078	10447431	1441138	Foxn2	49.4583	42.4965	45.9774	34.7556	46.5214	1.42303	0.913484	1.16826	40.6385	1.13138	AV295543	forkhead box N2	0006355 // regulation of transcription, DNA-dependent // inferred from electronic annotation	0005634 // nucleus // inferred from electronic annotation	0003677 // DNA binding // inferred from electronic annotation /// 0003700 // transcription factor activity // inferred from electronic annotation /// 0043565 // sequence-specific DNA binding // inferred from electronic annotation	---
Fam107a	0.00389482	10417561	1434203	Fam107a	89.1965	307.633	198.415	67.7697	299.016	1.31617	1.02882	1.17249	183.393	1.08191	BF682848	family with sequence similarity 107, member A	0001558 // regulation of cell growth // inferred from electronic annotation	0005634 // nucleus // inferred from electronic annotation	0005515 // protein binding // inferred from electronic annotation	---
Cntfr	0.00758419	10512279	1419429	Cntfr	208.727	504.737	356.732	265.279	323.698	0.786819	1.55929	1.17305	294.488	1.21136	NM_016673	ciliary neurotrophic factor receptor	0008284 // positive regulation of cell proliferation // inferred from genetic interaction	0005886 // plasma membrane // inferred from electronic annotation /// 0016020 // membrane // inferred from electronic annotation /// 0031225 // anchored to membrane // inferred from electronic annotation	0004872 // receptor activity // inferred from electronic annotation /// 0004896 // cytokine receptor activity // inferred from electronic annotation /// 0005515 // protein binding // inferred from physical interaction /// 0019955 // cytokine binding // inferred from electronic annotation	---
Srp72	0.00939007	10522676	1428876	Srp72	2882.29	3430.84	3156.57	2690.62	2689.24	1.07124	1.27577	1.1735	2689.93	1.17348	BM942773	signal recognition particle 72	0006614 // SRP-dependent cotranslational protein targeting to membrane // not recorded /// 0006614 // SRP-dependent cotranslational protein targeting to membrane // inferred from electronic annotation	0005730 // nucleolus // not recorded /// 0005730 // nucleolus // inferred from electronic annotation /// 0005786 // signal recognition particle, endoplasmic reticulum targeting // not recorded /// 0048500 // signal recognition particle // inferred from electronic annotation	0005488 // binding // inferred from electronic annotation /// 0008312 // 7S RNA binding // inferred from electronic annotation	---
Tgfbr1	0.0173912	10504817	1420895	Tgfbr1	3614.37	3584.94	3599.65	3458.61	2753.23	1.04504	1.30208	1.17356	3105.92	1.15897	BM248342	transforming growth factor, beta receptor I	0001501 // skeletal system development // inferred from genetic interaction /// 0001701 // in utero embryonic development // inferred from mutant phenotype /// 0001822 // kidney development // inferred from genetic interaction /// 0006468 // protein amino acid phosphorylation // inferred from electronic annotation /// 0006917 // induction of apoptosis // inferred from mutant phenotype /// 0007165…	0016020 // membrane // inferred from electronic annotation /// 0016021 // integral to membrane // inferred from electronic annotation /// 0016323 // basolateral plasma membrane // inferred from electronic annotation /// 0016324 // apical plasma membrane // inferred from electronic annotation /// 0043235 // receptor complex // inferred from electronic annotation	0000166 // nucleotide binding // inferred from electronic annotation /// 0000287 // magnesium ion binding // inferred from electronic annotation /// 0004672 // protein kinase activity // inferred from electronic annotation /// 0004674 // protein serine/threonine kinase activity // inferred from electronic annotation /// 0004675 // transmembrane receptor protein serine/threonine kinase activity //…	TGF_Beta_Signaling_Pathway // GenMAPP
Ifnar2	0.00244254	10436830	1427691	Ifnar2	420.159	355.717	387.938	397.291	274.73	1.05756	1.29479	1.17617	336.011	1.15454	Y09864	interferon (alpha and beta) receptor 2	0006357 // regulation of transcription from RNA polymerase II promoter // inferred from direct assay /// 0008283 // cell proliferation // inferred from direct assay	0005615 // extracellular space // inferred from direct assay /// 0016020 // membrane // inferred from electronic annotation /// 0016021 // integral to membrane // traceable author statement /// 0016021 // integral to membrane // inferred from electronic annotation	0004872 // receptor activity // inferred from electronic annotation /// 0004905 // type I interferon receptor activity // inferred from direct assay /// 0005515 // protein binding // inferred from physical interaction	---
Ndufa8	0.011578	10482089	1423692	Ndufa8	23163.1	18362.5	20762.8	18110.6	17028.7	1.27898	1.07833	1.17865	17569.6	1.18174	BC012416	NADH dehydrogenase (ubiquinone) 1 alpha subcomplex, 8	0006810 // transport // inferred from electronic annotation /// 0022900 // electron transport chain // inferred from electronic annotation	0005739 // mitochondrion // inferred from direct assay /// 0005739 // mitochondrion // inferred from electronic annotation /// 0005743 // mitochondrial inner membrane // inferred from direct assay /// 0005746 // mitochondrial respiratory chain // inferred from electronic annotation	---	Electron_Transport_Chain // GenMAPP
Gpam	0.00150322	10468533	1419499	Gpam	14249.9	12398.1	13324	11350.2	11236.2	1.25548	1.10341	1.17944	11293.2	1.17983	NM_008149	glycerol-3-phosphate acyltransferase, mitochondrial	0006631 // fatty acid metabolic process // inferred from mutant phenotype /// 0008152 // metabolic process // inferred from electronic annotation /// 0008654 // phospholipid biosynthetic process // inferred from electronic annotation /// 0040018 // positive regulation of multicellular organism growth // inferred from mutant phenotype	0005739 // mitochondrion // inferred from direct assay /// 0005739 // mitochondrion // inferred from electronic annotation /// 0005741 // mitochondrial outer membrane // inferred from electronic annotation /// 0005743 // mitochondrial inner membrane // inferred from direct assay /// 0016020 // membrane // inferred from electronic annotation /// 0016021 // integral to membrane // inferred from ele…	0004366 // glycerol-3-phosphate O-acyltransferase activity // inferred from direct assay /// 0004366 // glycerol-3-phosphate O-acyltransferase activity // inferred from electronic annotation /// 0008415 // acyltransferase activity // inferred from electronic annotation /// 0016740 // transferase activity // inferred from electronic annotation	---
Noct	0.00309146	10491915	1425837	Ccrn4l /// LOC100047134	1995.36	3870	2932.68	2058.7	2765.51	0.969232	1.39938	1.1843	2412.11	1.21582	AF199491	CCR4 carbon catabolite repression 4-like (S. cerevisiae) /// similar to carbon catabolite repression 4 protein homolog	0048511 // rhythmic process // inferred from electronic annotation	---	---	---
Tead1	0.00309146	10556442	1423434	Tead1	281.553	80.5299	181.041	186.109	94.097	1.51284	0.855818	1.18433	140.103	1.2922	BB546942	TEA domain family member 1	0006350 // transcription // inferred from electronic annotation /// 0006355 // regulation of transcription, DNA-dependent // inferred from direct assay /// 0006355 // regulation of transcription, DNA-dependent // inferred from electronic annotation /// 0007507 // heart development // inferred from mutant phenotype /// 0045944 // positive regulation of transcription from RNA polymerase II promoter…	0005634 // nucleus // inferred from electronic annotation /// 0005667 // transcription factor complex // inferred by curator /// 0005667 // transcription factor complex // inferred from direct assay	0003677 // DNA binding // inferred from direct assay /// 0003677 // DNA binding // inferred from electronic annotation /// 0003700 // transcription factor activity // inferred from direct assay /// 0003700 // transcription factor activity // inferred from electronic annotation /// 0005515 // protein binding // inferred from physical interaction /// 0005515 // protein binding // inferred from elec…	---
Ikzf2	0.00117065	10355312	1456956	Ikzf2	838.641	1089.94	964.29	875.88	770.9	0.957484	1.41385	1.18567	823.39	1.17112	BB291816	IKAROS family zinc finger 2	0006350 // transcription // inferred from electronic annotation /// 0006355 // regulation of transcription, DNA-dependent // inferred from electronic annotation	0005622 // intracellular // inferred from electronic annotation /// 0005634 // nucleus // inferred from electronic annotation	0003676 // nucleic acid binding // inferred from electronic annotation /// 0003677 // DNA binding // inferred from electronic annotation /// 0008270 // zinc ion binding // inferred from electronic annotation /// 0046872 // metal ion binding // inferred from electronic annotation	---
Fam126b	0.00389482	10354868	1456320	Fam126b	611.349	658.593	634.971	597.65	488.399	1.02292	1.34847	1.1857	543.024	1.16932	BB701297	family with sequence similarity 126, member B	---	0005622 // intracellular // inferred from electronic annotation	---	---
Bfar	0.0257197	10433660	1426488	Bfar	1881.55	1838.51	1860.03	1665.14	1460.91	1.12996	1.25846	1.19421	1563.03	1.19001	AK013874	bifunctional apoptosis regulator	0006915 // apoptosis // inferred from electronic annotation /// 0006916 // anti-apoptosis // not recorded	0005624 // membrane fraction // not recorded /// 0005783 // endoplasmic reticulum // inferred from electronic annotation /// 0005789 // endoplasmic reticulum membrane // inferred from electronic annotation /// 0016020 // membrane // inferred from electronic annotation /// 0016021 // integral to membrane // inferred from electronic annotation	0005515 // protein binding // inferred from electronic annotation /// 0008270 // zinc ion binding // inferred from electronic annotation /// 0046872 // metal ion binding // inferred from electronic annotation	---
Casp7	0.0142182	10464128	1448659	Casp7	377.662	354.081	365.871	266.05	357.691	1.41952	0.989906	1.20471	311.87	1.17315	NM_007611	caspase 7	0001836 // release of cytochrome c from mitochondria // inferred from genetic interaction /// 0006508 // proteolysis // inferred from reviewed computational analysis /// 0006508 // proteolysis // inferred from electronic annotation /// 0006915 // apoptosis // inferred from electronic annotation /// 0006917 // induction of apoptosis // inferred from genetic interaction /// 0006917 // induction of …	0005737 // cytoplasm // inferred from electronic annotation	0004197 // cysteine-type endopeptidase activity // inferred from electronic annotation /// 0008233 // peptidase activity // inferred from direct assay /// 0008233 // peptidase activity // inferred from reviewed computational analysis /// 0008233 // peptidase activity // inferred from electronic annotation /// 0008234 // cysteine-type peptidase activity // inferred from electronic annotation /// 0…	Apoptosis // GenMAPP /// Apoptosis_GenMAPP // GenMAPP /// Apoptosis_KEGG // GenMAPP
Sfxn1	0.00192078	10405236	1417559	Sfxn1	203.285	323.13	263.207	289.202	189.137	0.702915	1.70845	1.20568	239.169	1.10051	BB478992	sideroflexin 1	0006810 // transport // inferred from electronic annotation /// 0006811 // ion transport // inferred from electronic annotation /// 0006812 // cation transport // inferred from electronic annotation /// 0006826 // iron ion transport // inferred from mutant phenotype /// 0006826 // iron ion transport // traceable author statement /// 0006826 // iron ion transport // inferred from electronic annota…	0005739 // mitochondrion // inferred from direct assay /// 0005739 // mitochondrion // inferred from electronic annotation /// 0005743 // mitochondrial inner membrane // inferred from direct assay /// 0016020 // membrane // inferred from electronic annotation /// 0016021 // integral to membrane // inferred from electronic annotation /// 0031966 // mitochondrial membrane // inferred from electroni…	0005506 // iron ion binding // inferred from electronic annotation /// 0005515 // protein binding // inferred from electronic annotation /// 0008324 // cation transmembrane transporter activity // inferred from electronic annotation	---
Hyls1	0.00192078	10592154	1431315	Hyls1	57.7797	40.7615	49.2706	51.5765	31.3479	1.12027	1.30029	1.21028	41.4622	1.18833	BM570636	hydrolethalus syndrome 1	---	0005634 // nucleus // not recorded /// 0005737 // cytoplasm // not recorded /// 0005737 // cytoplasm // inferred from electronic annotation	---	---
Trim16	0.00609984	10376899	1460629	Fbxw10 /// Trim16	1362.42	1344.91	1353.66	1056.25	1188.2	1.28987	1.13188	1.21087	1122.23	1.20623	BB033733	F-box and WD-40 domain protein 10 /// tripartite motif-containing 16	---	0005622 // intracellular // inferred from electronic annotation /// 0005737 // cytoplasm // inferred from direct assay /// 0005737 // cytoplasm // inferred from electronic annotation	0008270 // zinc ion binding // inferred from electronic annotation /// 0046872 // metal ion binding // inferred from electronic annotation	---
Zfp655	0.00150322	10527475	1429217	Zfp655	266.788	499.885	383.337	292.846	330.374	0.911018	1.51309	1.21205	311.61	1.23018	AK018500	zinc finger protein 655	0006355 // regulation of transcription, DNA-dependent // inferred from electronic annotation	0005622 // intracellular // inferred from electronic annotation	0003676 // nucleic acid binding // inferred from electronic annotation /// 0005515 // protein binding // inferred from electronic annotation /// 0008270 // zinc ion binding // inferred from electronic annotation	---
Cry1	0.000699194	10371400	1433733	Cry1	421.02	391.011	406.015	330.116	339.759	1.27537	1.15085	1.21311	334.937	1.21221	BG069864	cryptochrome 1 (photolyase-like)	0006281 // DNA repair // inferred from electronic annotation /// 0006350 // transcription // inferred from electronic annotation /// 0006355 // regulation of transcription, DNA-dependent // inferred from electronic annotation /// 0007623 // circadian rhythm // inferred from direct assay /// 0007623 // circadian rhythm // inferred from mutant phenotype /// 0018298 // protein-chromophore linkage //…	0005634 // nucleus // inferred from direct assay /// 0005634 // nucleus // inferred from electronic annotation /// 0005737 // cytoplasm // inferred from electronic annotation	0000166 // nucleotide binding // inferred from electronic annotation /// 0003913 // DNA photolyase activity // inferred from electronic annotation /// 0004872 // receptor activity // inferred from electronic annotation /// 0005515 // protein binding // inferred from physical interaction /// 0009881 // photoreceptor activity // inferred from electronic annotation	Circadian_Exercise // GenMAPP
Srebf2	0.00031003	10425695	1426744	Srebf2	72.8731	12.1899	42.5315	34.0231	42.3653	2.14187	0.287734	1.2148	38.1942	1.11356	BM123132	sterol regulatory element binding factor 2	0006350 // transcription // inferred from electronic annotation /// 0006355 // regulation of transcription, DNA-dependent // inferred from electronic annotation /// 0006629 // lipid metabolic process // inferred from electronic annotation /// 0008202 // steroid metabolic process // inferred from electronic annotation /// 0008203 // cholesterol metabolic process // inferred from electronic annotat…	0000139 // Golgi membrane // inferred from electronic annotation /// 0005634 // nucleus // inferred from direct assay /// 0005634 // nucleus // inferred from electronic annotation /// 0005783 // endoplasmic reticulum // inferred from electronic annotation /// 0005789 // endoplasmic reticulum membrane // inferred from electronic annotation /// 0005794 // Golgi apparatus // inferred from electronic…	0003677 // DNA binding // inferred from direct assay /// 0003677 // DNA binding // inferred from electronic annotation /// 0003700 // transcription factor activity // inferred from direct assay /// 0005515 // protein binding // inferred from physical interaction /// 0030528 // transcription regulator activity // inferred from electronic annotation	---
Parl	0.0257197	10438460	1433478	Parl	4829.56	4373.89	4601.72	3930.65	3635.74	1.22869	1.20302	1.21586	3783.2	1.21636	BQ174254	presenilin associated, rhomboid-like	---	0005634 // nucleus // inferred from electronic annotation /// 0005739 // mitochondrion // inferred from electronic annotation /// 0005743 // mitochondrial inner membrane // inferred from electronic annotation /// 0016020 // membrane // inferred from electronic annotation /// 0016021 // integral to membrane // inferred from electronic annotation	0008233 // peptidase activity // inferred from electronic annotation /// 0008236 // serine-type peptidase activity // inferred from electronic annotation /// 0016787 // hydrolase activity // inferred from electronic annotation	---
Ppfibp2	0.00244254	10556082	1417801	Ppfibp2	243.15	255.345	249.248	270.858	164.856	0.897702	1.5489	1.2233	217.857	1.14409	NM_008905	protein tyrosine phosphatase, receptor-type, F interacting protein, binding protein 2	0015074 // DNA integration // inferred from electronic annotation	0005634 // nucleus // inferred from electronic annotation	0003677 // DNA binding // inferred from electronic annotation /// 0008907 // integrase activity // inferred from electronic annotation	---
Gna13	9.66e-05	10382243	1433749	Gna13	3992.16	2921.64	3456.9	3471.44	2250.71	1.15	1.2981	1.22405	2861.08	1.20825	BG073165	guanine nucleotide binding protein, alpha 13	0001525 // angiogenesis // inferred from mutant phenotype /// 0001569 // patterning of blood vessels // inferred from mutant phenotype /// 0001701 // in utero embryonic development // inferred from genetic interaction /// 0007165 // signal transduction // inferred from electronic annotation /// 0007186 // G-protein coupled receptor protein signaling pathway // not recorded /// 0007186 // G-protei…	0005834 // heterotrimeric G-protein complex // not recorded /// 0005834 // heterotrimeric G-protein complex // traceable author statement /// 0016020 // membrane // inferred from electronic annotation /// 0042470 // melanosome // inferred from electronic annotation	0000166 // nucleotide binding // inferred from electronic annotation /// 0003924 // GTPase activity // not recorded /// 0003924 // GTPase activity // traceable author statement /// 0004871 // signal transducer activity // inferred from electronic annotation /// 0005515 // protein binding // inferred from electronic annotation /// 0005525 // GTP binding // inferred from electronic annotation /// 0…	G13_Signaling_Pathway // GenMAPP /// G_Protein_Signaling // GenMAPP
Pdia4	0.000907061	10544525	1416497	Pdia4	150.786	142.353	146.569	140.737	102.81	1.0714	1.38462	1.22801	121.774	1.20362	J05186	protein disulfide isomerase associated 4	0045454 // cell redox homeostasis // inferred from electronic annotation	0005783 // endoplasmic reticulum // inferred from direct assay /// 0005783 // endoplasmic reticulum // inferred from electronic annotation /// 0005788 // endoplasmic reticulum lumen // inferred from electronic annotation /// 0042470 // melanosome // inferred from electronic annotation	0003756 // protein disulfide isomerase activity // inferred from electronic annotation /// 0005515 // protein binding // inferred from electronic annotation /// 0016853 // isomerase activity // inferred from electronic annotation	---
Ep400	0.00192078	10532407	1453130	Ep400	83.3096	69.5993	76.4544	136.804	37.6491	0.608973	1.84863	1.2288	87.2263	0.876507	AK006168	E1A binding protein p400	0016568 // chromatin modification // inferred from electronic annotation	0005634 // nucleus // inferred from electronic annotation	0000166 // nucleotide binding // inferred from electronic annotation /// 0003676 // nucleic acid binding // inferred from electronic annotation /// 0003677 // DNA binding // inferred from electronic annotation /// 0004386 // helicase activity // inferred from electronic annotation /// 0005524 // ATP binding // inferred from electronic annotation /// 0016787 // hydrolase activity // inferred from …	---
Slc25a17	0.0173912	10430711	1424912	Slc25a17	475.501	464.991	470.246	428.34	341.119	1.1101	1.36314	1.23662	384.73	1.22228	BC011292	solute carrier family 25 (mitochondrial carrier, peroxisomal membrane protein), member 17	0006810 // transport // inferred from electronic annotation /// 0006839 // mitochondrial transport // inferred from electronic annotation	0005739 // mitochondrion // inferred from direct assay /// 0005743 // mitochondrial inner membrane // inferred from electronic annotation /// 0005777 // peroxisome // inferred from electronic annotation /// 0005778 // peroxisomal membrane // inferred from direct assay /// 0005778 // peroxisomal membrane // inferred from electronic annotation /// 0016020 // membrane // inferred from electronic ann…	0005215 // transporter activity // inferred from electronic annotation /// 0005488 // binding // inferred from electronic annotation /// 0005515 // protein binding // inferred from electronic annotation	---
Bbs5	0.0257197	10472549	1429762	Bbs5	477.521	602.094	539.808	465.315	415.11	1.02623	1.45045	1.23834	440.212	1.22624	AV260123	Bardet-Biedl syndrome 5 (human)	---	0005737 // cytoplasm // inferred from electronic annotation /// 0005886 // plasma membrane // inferred from electronic annotation /// 0005929 // cilium // inferred from electronic annotation /// 0005932 // microtubule basal body // inferred from direct assay /// 0016020 // membrane // inferred from electronic annotation /// 0042995 // cell projection // inferred from electronic annotation	---	---
Hlf	9.73e-06	10389786	1434736	Hlf	334.901	635.077	484.989	280.101	495.511	1.19565	1.28166	1.23865	387.806	1.2506	BB744589	hepatic leukemia factor	0006350 // transcription // inferred from electronic annotation /// 0006355 // regulation of transcription, DNA-dependent // inferred from electronic annotation /// 0048511 // rhythmic process // inferred from electronic annotation	0005634 // nucleus // inferred from electronic annotation	0003677 // DNA binding // inferred from electronic annotation /// 0003700 // transcription factor activity // inferred from electronic annotation /// 0043565 // sequence-specific DNA binding // inferred from electronic annotation /// 0046983 // protein dimerization activity // inferred from electronic annotation	---
Cluap1	0.00939007	10433228	1424388	Cluap1	702.552	757.725	730.139	651.123	539.083	1.07899	1.40558	1.24228	595.103	1.22691	BC024910	clusterin associated protein 1	---	0005634 // nucleus // inferred from electronic annotation	0005515 // protein binding // inferred from electronic annotation	---
Erg	0.00309146	10441093	1425370	Erg	13.9772	13.7717	13.8744	9.86285	12.7095	1.41715	1.08357	1.25036	11.2862	1.22933	AB073079	avian erythroblastosis virus E-26 (v-ets) oncogene related	0006350 // transcription // inferred from electronic annotation /// 0006355 // regulation of transcription, DNA-dependent // inferred from electronic annotation	0005634 // nucleus // inferred from electronic annotation	0003677 // DNA binding // inferred from electronic annotation /// 0003700 // transcription factor activity // inferred from electronic annotation /// 0005515 // protein binding // inferred from physical interaction /// 0043565 // sequence-specific DNA binding // inferred from electronic annotation	---
Cept1	5.2e-05	10501051	1416471	Cept1	5188.64	4345.99	4767.31	4804	3058.2	1.08007	1.4211	1.25058	3931.1	1.21272	NM_133869	choline/ethanolaminephosphotransferase 1	0008654 // phospholipid biosynthetic process // inferred from electronic annotation	0005634 // nucleus // inferred from electronic annotation /// 0005783 // endoplasmic reticulum // inferred from electronic annotation /// 0005789 // endoplasmic reticulum membrane // inferred from direct assay /// 0005789 // endoplasmic reticulum membrane // inferred from electronic annotation /// 0016020 // membrane // inferred from electronic annotation /// 0016021 // integral to membrane // in…	0000287 // magnesium ion binding // inferred from electronic annotation /// 0004142 // diacylglycerol cholinephosphotransferase activity // inferred from electronic annotation /// 0004307 // ethanolaminephosphotransferase activity // inferred from electronic annotation /// 0016740 // transferase activity // inferred from electronic annotation /// 0016780 // phosphotransferase activity, for other …	---
B3galt2	0.0128981	10350473	1423084	B3galt2	89.1768	5.56487	47.3708	38.7421	27.457	2.30181	0.202676	1.25224	33.0995	1.43116	BB223909	UDP-Gal:betaGlcNAc beta 1,3-galactosyltransferase, polypeptide 2	0006486 // protein amino acid glycosylation // inferred from electronic annotation /// 0009312 // oligosaccharide biosynthetic process // inferred from direct assay	0000139 // Golgi membrane // inferred from electronic annotation /// 0005794 // Golgi apparatus // inferred from electronic annotation /// 0016020 // membrane // inferred from electronic annotation /// 0016021 // integral to membrane // inferred from electronic annotation	0008378 // galactosyltransferase activity // inferred from electronic annotation /// 0008499 // UDP-galactose:beta-N-acetylglucosamine beta-1,3-galactosyltransferase activity // inferred from direct assay /// 0016740 // transferase activity // inferred from electronic annotation /// 0016757 // transferase activity, transferring glycosyl groups // inferred from electronic annotation /// 0030145 //…	---
Wsb1	3.16e-09	10388938	1425241	Wsb1	564.956	271.831	418.393	483.52	202.364	1.16842	1.34328	1.25585	342.942	1.22001	BC019601	WD repeat and SOCS box-containing 1	0006511 // ubiquitin-dependent protein catabolic process // inferred from electronic annotation /// 0007242 // intracellular signaling cascade // inferred from electronic annotation	0005622 // intracellular // inferred from electronic annotation	0005515 // protein binding // inferred from physical interaction	---
Fam124b	0.00192078	10355998	1440676	Fam124b	77.8679	51.0327	64.4503	52.3022	49.7745	1.48881	1.02528	1.25704	51.0384	1.26278	BB269760	family with sequence similarity 124, member B	---	---	---	---
Tnfaip3	0.00031003	10368144	1433699	Tnfaip3	466.788	530.953	498.87	505.311	333.303	0.923765	1.593	1.25838	419.307	1.18975	BM241351	tumor necrosis factor, alpha-induced protein 3	0006511 // ubiquitin-dependent protein catabolic process // inferred from electronic annotation /// 0006915 // apoptosis // inferred from electronic annotation /// 0043124 // negative regulation of I-kappaB kinase/NF-kappaB cascade // inferred from electronic annotation	0005634 // nucleus // inferred from electronic annotation /// 0005737 // cytoplasm // inferred from direct assay /// 0005737 // cytoplasm // inferred from electronic annotation	0003677 // DNA binding // inferred from electronic annotation /// 0005515 // protein binding // inferred from physical interaction /// 0005515 // protein binding // inferred from electronic annotation /// 0008233 // peptidase activity // inferred from electronic annotation /// 0008234 // cysteine-type peptidase activity // inferred from electronic annotation /// 0008270 // zinc ion binding // inf…	---
Zscan26	0.00031003	10408032	1457285	Zfp187	2059.31	1526.74	1793.02	1618.89	1226.46	1.27205	1.24484	1.25844	1422.67	1.26032	BB354728	zinc finger protein 187	0006350 // transcription // inferred from electronic annotation /// 0006355 // regulation of transcription, DNA-dependent // inferred from electronic annotation	0005622 // intracellular // inferred from electronic annotation /// 0005634 // nucleus // inferred from electronic annotation	0003676 // nucleic acid binding // inferred from electronic annotation /// 0003700 // transcription factor activity // inferred from electronic annotation /// 0008270 // zinc ion binding // inferred from electronic annotation /// 0046872 // metal ion binding // inferred from electronic annotation	---
Smchd1	0.0128981	10452658	1428251	Smchd1	966.543	758.731	862.637	686.587	673.637	1.40775	1.12632	1.26703	680.112	1.26837	AK016419	SMC hinge domain containing 1	0051276 // chromosome organization // inferred from electronic annotation	0005694 // chromosome // inferred from electronic annotation	0005515 // protein binding // inferred from electronic annotation /// 0005524 // ATP binding // inferred from electronic annotation	---
Myf6	9.66e-05	10372230	1419150	Myf6	10290.6	11283	10786.8	8009.23	9001.16	1.28484	1.25351	1.26917	8505.2	1.26826	NM_008657	myogenic factor 6	0001756 // somitogenesis // inferred from mutant phenotype /// 0006355 // regulation of transcription, DNA-dependent // inferred from electronic annotation /// 0007275 // multicellular organismal development // inferred from electronic annotation /// 0007517 // muscle development // inferred from electronic annotation /// 0007519 // skeletal muscle development // inferred from mutant phenotype //…	0005634 // nucleus // traceable author statement /// 0005634 // nucleus // inferred from electronic annotation	0003677 // DNA binding // inferred from electronic annotation /// 0003705 // RNA polymerase II transcription factor activity, enhancer binding // traceable author statement /// 0030528 // transcription regulator activity // inferred from electronic annotation	Circadian_Exercise // GenMAPP
Hmgcs1	0.00488493	10412466	1441536	Hmgcs1	35.9738	22.2174	29.0956	20.1156	29.0379	1.78836	0.765115	1.27674	24.5768	1.18387	AV362707	3-hydroxy-3-methylglutaryl-Coenzyme A synthase 1	0006694 // steroid biosynthetic process // inferred from electronic annotation /// 0006695 // cholesterol biosynthetic process // inferred from electronic annotation /// 0008152 // metabolic process // inferred from electronic annotation /// 0008299 // isoprenoid biosynthetic process // inferred from electronic annotation /// 0008610 // lipid biosynthetic process // inferred from electronic annot…	0005737 // cytoplasm // inferred from electronic annotation	0003824 // catalytic activity // inferred from electronic annotation /// 0004421 // hydroxymethylglutaryl-CoA synthase activity // inferred from electronic annotation /// 0016740 // transferase activity // inferred from electronic annotation	Cholesterol_Biosynthesis // GenMAPP
Rreb1	0.0257197	10404612	1428657	Rreb1	1457.23	1518.15	1487.69	1250.89	1089.49	1.16496	1.39345	1.2792	1170.19	1.27132	BE197381	ras responsive element binding protein 1	0006350 // transcription // inferred from electronic annotation /// 0006355 // regulation of transcription, DNA-dependent // inferred from electronic annotation	0005622 // intracellular // inferred from electronic annotation /// 0005634 // nucleus // inferred from electronic annotation /// 0016607 // nuclear speck // inferred from electronic annotation	0003676 // nucleic acid binding // inferred from electronic annotation /// 0003677 // DNA binding // inferred from electronic annotation /// 0008270 // zinc ion binding // inferred from electronic annotation /// 0046872 // metal ion binding // inferred from electronic annotation	---
Rel	9.73e-06	10384725	1420710	Rel	130.188	126.153	128.17	83.624	125.326	1.55682	1.0066	1.28171	104.475	1.2268	NM_009044	reticuloendotheliosis oncogene	0001816 // cytokine production // inferred from mutant phenotype /// 0006350 // transcription // inferred from electronic annotation /// 0006355 // regulation of transcription, DNA-dependent // inferred from electronic annotation /// 0043123 // positive regulation of I-kappaB kinase/NF-kappaB cascade // inferred from electronic annotation /// 0045084 // positive regulation of interleukin-12 biosy…	0005634 // nucleus // inferred by curator /// 0005634 // nucleus // inferred from direct assay /// 0005634 // nucleus // inferred from electronic annotation	0003677 // DNA binding // inferred from electronic annotation /// 0003700 // transcription factor activity // inferred from direct assay /// 0003700 // transcription factor activity // inferred from electronic annotation /// 0005515 // protein binding // inferred from physical interaction /// 0005515 // protein binding // inferred from electronic annotation	---
Npc2	0.00758419	10401519	1416901	Npc2	4247.56	4966.62	4607.09	4345.27	3131.16	0.977515	1.58619	1.28185	3738.22	1.23243	BC007190	Niemann Pick type C2	0030301 // cholesterol transport // inferred from sequence or structural similarity /// 0032366 // intracellular sterol transport // inferred from sequence or structural similarity /// 0032367 // intracellular cholesterol transport // inferred from mutant phenotype /// 0032367 // intracellular cholesterol transport // inferred from electronic annotation /// 0042632 // cholesterol homeostasis // i…	0005576 // extracellular region // inferred from electronic annotation /// 0005764 // lysosome // inferred from sequence or structural similarity /// 0005764 // lysosome // inferred from electronic annotation	0015485 // cholesterol binding // inferred from sequence or structural similarity /// 0015485 // cholesterol binding // inferred from electronic annotation /// 0019899 // enzyme binding // inferred from electronic annotation	---
Ezr	0.00389482	10447602	1450850	Ezr /// LOC100044177	75.2378	210.099	142.669	172.863	97.7977	0.435245	2.1483	1.29177	135.331	1.05422	BM119387	ezrin /// hypothetical protein LOC100044177	0008360 // regulation of cell shape // inferred from electronic annotation /// 0035088 // establishment or maintenance of apical/basal cell polarity // inferred from mutant phenotype /// 0051017 // actin filament bundle formation // inferred from sequence or structural similarity	0001931 // uropod // inferred from direct assay /// 0005737 // cytoplasm // inferred from electronic annotation /// 0005856 // cytoskeleton // inferred from electronic annotation /// 0005884 // actin filament // inferred from sequence or structural similarity /// 0005886 // plasma membrane // inferred from electronic annotation /// 0005902 // microvillus // inferred from direct assay /// 0005932 …	0005488 // binding // inferred from electronic annotation /// 0005515 // protein binding // inferred from physical interaction /// 0005515 // protein binding // inferred from sequence or structural similarity /// 0008092 // cytoskeletal protein binding // inferred from electronic annotation /// 0043621 // protein self-association // inferred from sequence or structural similarity /// 0050839 // c…	---
Dpp4	0.0173912	10483046	1416697	Dpp4	490.817	525.722	508.269	369.452	416.264	1.3285	1.26295	1.29573	392.858	1.29377	NM_010074	dipeptidylpeptidase 4	0001666 // response to hypoxia // inferred from electronic annotation /// 0006508 // proteolysis // inferred from electronic annotation /// 0033632 // regulation of cell-cell adhesion mediated by integrin // inferred from electronic annotation /// 0042110 // T cell activation // inferred from electronic annotation	0005576 // extracellular region // inferred from electronic annotation /// 0005886 // plasma membrane // inferred from electronic annotation /// 0009986 // cell surface // inferred from electronic annotation /// 0016020 // membrane // inferred from electronic annotation /// 0016021 // integral to membrane // inferred from electronic annotation /// 0046581 // intercellular canaliculus // inferred …	0004177 // aminopeptidase activity // inferred from electronic annotation /// 0004252 // serine-type endopeptidase activity // inferred from electronic annotation /// 0005515 // protein binding // inferred from electronic annotation /// 0008233 // peptidase activity // inferred from electronic annotation /// 0008236 // serine-type peptidase activity // inferred from electronic annotation /// 0016…	---
Intu	0.00488493	10491753	1444272	Intu	10.7309	24.8756	17.8032	49.7429	10.457	0.215727	2.37885	1.29729	30.0999	0.591471	BB207089	inturned planar cell polarity effector homolog (Drosophila)	---	---	0005515 // protein binding // inferred from electronic annotation	---
Cstf3	0.000175216	10474243	1424723	Cstf3	1488.94	876.81	1182.88	958.653	838.798	1.55316	1.04532	1.29924	898.725	1.31617	BC003241	cleavage stimulation factor, 3' pre-RNA, subunit 3	0006396 // RNA processing // inferred from electronic annotation /// 0006397 // mRNA processing // inferred from electronic annotation	0005622 // intracellular // inferred from electronic annotation /// 0005634 // nucleus // inferred from electronic annotation	0005515 // protein binding // inferred from electronic annotation	mRNA_processing_binding_Reactome // GenMAPP
Jmjd1c	1.38e-05	10363706	1426900	Jmjd1c	3190.78	2515.37	2853.07	2318.2	2056.16	1.3764	1.22334	1.29987	2187.18	1.30445	AV293164	jumonji domain containing 1C	0006350 // transcription // inferred from electronic annotation /// 0006355 // regulation of transcription, DNA-dependent // inferred from electronic annotation /// 0016568 // chromatin modification // inferred from electronic annotation /// 0055114 // oxidation reduction // inferred from electronic annotation	0005634 // nucleus // inferred from electronic annotation	0005506 // iron ion binding // inferred from electronic annotation /// 0008270 // zinc ion binding // inferred from electronic annotation /// 0016491 // oxidoreductase activity // inferred from electronic annotation /// 0016702 // oxidoreductase activity, acting on single donors with incorporation of molecular oxygen, incorporation of two atoms of oxygen // inferred from electronic annotation ///…	---
Fam214a	0.00609984	10587085	1436033	BC031353	1681.45	1829.73	1755.59	1312.44	1379.97	1.28117	1.32592	1.30354	1346.2	1.30411	BG276629	cDNA sequence BC031353	---	---	---	---
Taf4b	0.0257197	10454077	1435302	Taf4b	369.978	230.234	300.106	264.261	187.255	1.40005	1.22952	1.31479	225.758	1.32933	AV373814	TAF4B RNA polymerase II, TATA box binding protein (TBP)-associated factor	0006352 // transcription initiation // inferred from electronic annotation /// 0006366 // transcription from RNA polymerase II promoter // traceable author statement	0005667 // transcription factor complex // traceable author statement /// 0005669 // transcription factor TFIID complex // inferred from electronic annotation	0016251 // general RNA polymerase II transcription factor activity // traceable author statement /// 0016986 // transcription initiation factor activity // inferred from electronic annotation	---
F3	0.0142182	10495675	1417408	F3	291.442	319.866	305.654	244.918	221.31	1.18996	1.44533	1.31764	233.114	1.31118	BC024886	coagulation factor III	0007596 // blood coagulation // traceable author statement /// 0007596 // blood coagulation // inferred from electronic annotation	0016020 // membrane // inferred from electronic annotation /// 0016021 // integral to membrane // inferred from electronic annotation	---	---
Psmd14	0.0211898	10472300	1421751	Psmd14	9423.53	7424.59	8424.06	6698.26	5978.84	1.40686	1.24181	1.32434	6338.55	1.32902	NM_021526	proteasome (prosome, macropain) 26S subunit, non-ATPase, 14	---	0000502 // proteasome complex // inferred from sequence or structural similarity /// 0005829 // cytosol // inferred from electronic annotation /// 0043234 // protein complex // inferred from electronic annotation	0004175 // endopeptidase activity // inferred from sequence or structural similarity /// 0005515 // protein binding // inferred from electronic annotation	---
Akap8	0.0142182	10449839	1433669	Akap8	2117.07	1964.06	2040.56	1685.1	1392.65	1.25634	1.4103	1.33332	1538.88	1.32601	BB037566	A kinase (PRKA) anchor protein 8	0007076 // mitotic chromosome condensation // inferred from direct assay /// 0007076 // mitotic chromosome condensation // not recorded	0000790 // nuclear chromatin // not recorded /// 0000793 // condensed chromosome // inferred from direct assay /// 0000793 // condensed chromosome // not recorded /// 0001939 // female pronucleus // inferred from direct assay /// 0005622 // intracellular // inferred from electronic annotation /// 0005634 // nucleus // inferred from direct assay /// 0005634 // nucleus // inferred from electronic a…	0003677 // DNA binding // inferred from electronic annotation /// 0003682 // chromatin binding // not recorded /// 0008270 // zinc ion binding // inferred from electronic annotation /// 0016301 // kinase activity // inferred from electronic annotation /// 0019901 // protein kinase binding // inferred from electronic annotation /// 0046872 // metal ion binding // inferred from electronic annotation	G_Protein_Signaling // GenMAPP
Tnfrsf19	0.00150322	10420596	1448147	Tnfrsf19	1061.45	553.777	807.616	713.899	468.392	1.48684	1.18229	1.33457	591.145	1.36619	NM_013869	tumor necrosis factor receptor superfamily, member 19	---	0005576 // extracellular region // inferred from electronic annotation /// 0005886 // plasma membrane // inferred from electronic annotation /// 0016020 // membrane // inferred from electronic annotation /// 0016021 // integral to membrane // inferred from electronic annotation	0004872 // receptor activity // inferred from electronic annotation	---
Nr1d2	1.49e-06	10417734	1416958	Nr1d2	13857.5	14087.7	13972.6	9535	11448.5	1.45333	1.23052	1.34192	10491.8	1.33177	NM_011584	nuclear receptor subfamily 1, group D, member 2	0006350 // transcription // inferred from electronic annotation /// 0006355 // regulation of transcription, DNA-dependent // inferred from direct assay /// 0006355 // regulation of transcription, DNA-dependent // inferred from electronic annotation	0005634 // nucleus // inferred from electronic annotation	0003677 // DNA binding // inferred from direct assay /// 0003677 // DNA binding // inferred from electronic annotation /// 0003700 // transcription factor activity // inferred from direct assay /// 0003700 // transcription factor activity // inferred from electronic annotation /// 0003707 // steroid hormone receptor activity // inferred from electronic annotation /// 0004872 // receptor activity …	Circadian_Exercise // GenMAPP /// Nuclear_Receptors // GenMAPP
Pex3	0.00389482	10367960	1417442	Pex3	831.246	669.734	750.49	545.838	574.737	1.52288	1.16529	1.34408	560.287	1.33947	AK012827	peroxisomal biogenesis factor 3	0007031 // peroxisome organization // inferred from electronic annotation	0005777 // peroxisome // not recorded /// 0005777 // peroxisome // inferred from electronic annotation /// 0005778 // peroxisomal membrane // inferred from electronic annotation /// 0005779 // integral to peroxisomal membrane // inferred from electronic annotation /// 0005887 // integral to plasma membrane // inferred from sequence or structural similarity /// 0016020 // membrane // inferred from…	---	---
Ccdc50	0.00040883	10434869	1431072	Ccdc50	864.119	647.406	755.763	662.255	460.009	1.30481	1.40738	1.35609	561.132	1.34685	BB865814	coiled-coil domain containing 50	---	0005737 // cytoplasm // inferred from electronic annotation	0005515 // protein binding // inferred from electronic annotation	---
Lhfpl2	0.00939007	10406676	1454847	Lhfpl2	318.203	369.08	343.641	333.333	209.894	0.954611	1.75841	1.35651	271.613	1.26519	BG917242	lipoma HMGIC fusion partner-like 2	---	0016020 // membrane // inferred from electronic annotation /// 0016021 // integral to membrane // inferred from electronic annotation	---	---
Acvr1	0.00758419	10482824	1448460	Acvr1	2179.49	1300.18	1739.84	1310.88	1225.47	1.66261	1.06096	1.36179	1268.18	1.37192	NM_007394	activin A receptor, type 1	0000082 // G1/S transition of mitotic cell cycle // inferred from electronic annotation /// 0001569 // patterning of blood vessels // inferred from mutant phenotype /// 0001655 // urogenital system development // not recorded /// 0001655 // urogenital system development // inferred from electronic annotation /// 0001701 // in utero embryonic development // inferred from mutant phenotype /// 00017…	0005887 // integral to plasma membrane // inferred from direct assay /// 0016020 // membrane // inferred from electronic annotation /// 0016021 // integral to membrane // inferred from electronic annotation /// 0045177 // apical part of cell // inferred from direct assay /// 0048179 // activin receptor complex // inferred from electronic annotation	0000166 // nucleotide binding // inferred from electronic annotation /// 0000287 // magnesium ion binding // inferred from electronic annotation /// 0004672 // protein kinase activity // inferred from electronic annotation /// 0004674 // protein serine/threonine kinase activity // inferred from electronic annotation /// 0004675 // transmembrane receptor protein serine/threonine kinase activity //…	---
Ndufb9	0.0158047	10424340	1452184	Ndufb9	50581.5	41979.9	46280.7	35547.8	31934.7	1.42291	1.31455	1.36873	33741.3	1.37163	W29413	NADH dehydrogenase (ubiquinone) 1 beta subcomplex, 9	0006810 // transport // inferred from electronic annotation /// 0022900 // electron transport chain // inferred from electronic annotation	0005739 // mitochondrion // inferred from direct assay /// 0005739 // mitochondrion // inferred from electronic annotation /// 0005743 // mitochondrial inner membrane // inferred from direct assay /// 0005743 // mitochondrial inner membrane // inferred from electronic annotation /// 0005746 // mitochondrial respiratory chain // inferred from electronic annotation /// 0016020 // membrane // inferr…	---	Electron_Transport_Chain // GenMAPP
Grk5	9.66e-05	10464425	1449514	Grk5	553.143	359.669	456.406	416.83	254.944	1.32702	1.41078	1.3689	335.887	1.35881	BC019379	G protein-coupled receptor kinase 5	0006468 // protein amino acid phosphorylation // inferred from electronic annotation /// 0007165 // signal transduction // inferred from electronic annotation /// 0008277 // regulation of G-protein coupled receptor protein signaling pathway // inferred from electronic annotation /// 0042493 // response to drug // inferred from electronic annotation	---	0000166 // nucleotide binding // inferred from electronic annotation /// 0004672 // protein kinase activity // inferred from electronic annotation /// 0004674 // protein serine/threonine kinase activity // inferred from electronic annotation /// 0004703 // G-protein coupled receptor kinase activity // inferred from electronic annotation /// 0004871 // signal transducer activity // inferred from e…	Calcium_regulation_in_cardiac_cells // GenMAPP /// Smooth_muscle_contraction // GenMAPP
Ptgis	0.00309146	10489878	1448816	Ptgis	618.51	749.498	684.004	481.477	514.535	1.28461	1.45665	1.37063	498.006	1.37348	NM_008968	prostaglandin I2 (prostacyclin) synthase	0001516 // prostaglandin biosynthetic process // inferred from electronic annotation /// 0006633 // fatty acid biosynthetic process // inferred from electronic annotation /// 0008610 // lipid biosynthetic process // inferred from electronic annotation	0005783 // endoplasmic reticulum // inferred from electronic annotation /// 0005789 // endoplasmic reticulum membrane // inferred from electronic annotation /// 0016020 // membrane // inferred from electronic annotation /// 0016021 // integral to membrane // inferred from electronic annotation	0004497 // monooxygenase activity // inferred from electronic annotation /// 0005506 // iron ion binding // inferred from electronic annotation /// 0008116 // prostaglandin-I synthase activity // inferred from electronic annotation /// 0009055 // electron carrier activity // inferred from electronic annotation /// 0016853 // isomerase activity // inferred from electronic annotation /// 0020037 //…	Eicosanoid_Synthesis // GenMAPP /// Prostaglandin_synthesis_regulation // GenMAPP
Osbpl1a	0.0211898	10457546	1460192	Osbpl1a	4539.87	3110.57	3825.22	3172.76	2369.57	1.43089	1.31272	1.3718	2771.16	1.38037	NM_020573	oxysterol binding protein-like 1A	0006810 // transport // inferred from electronic annotation /// 0006869 // lipid transport // inferred from electronic annotation /// 0008202 // steroid metabolic process // inferred from electronic annotation	---	---	---
Clock	4.38e-08	10530733	1418659	Clock	3277.14	1552.85	2414.99	2218.58	1222.27	1.47713	1.27047	1.3738	1720.43	1.40372	BB203106	circadian locomoter output cycles kaput	0000160 // two-component signal transduction system (phosphorelay) // inferred from electronic annotation /// 0006350 // transcription // inferred from electronic annotation /// 0006355 // regulation of transcription, DNA-dependent // inferred from direct assay /// 0006355 // regulation of transcription, DNA-dependent // inferred from electronic annotation /// 0007165 // signal transduction // in…	0005634 // nucleus // inferred from direct assay /// 0005634 // nucleus // inferred from electronic annotation /// 0005667 // transcription factor complex // inferred from direct assay /// 0005667 // transcription factor complex // not recorded /// 0005667 // transcription factor complex // inferred from electronic annotation /// 0005737 // cytoplasm // inferred from direct assay /// 0005737 // c…	0000155 // two-component sensor activity // inferred from electronic annotation /// 0003677 // DNA binding // inferred from electronic annotation /// 0003700 // transcription factor activity // inferred from direct assay /// 0003700 // transcription factor activity // not recorded /// 0003700 // transcription factor activity // inferred from electronic annotation /// 0004402 // histone acetyltran…	Circadian_Exercise // GenMAPP
Slc16a10	0.000536109	10368720	1440569	Slc16a10	279.994	672.384	476.189	306.001	365.517	0.91501	1.83954	1.37728	335.759	1.41825	BB667628	solute carrier family 16 (monocarboxylic acid transporters), member 10	0006810 // transport // inferred from electronic annotation	0005886 // plasma membrane // inferred from electronic annotation /// 0016020 // membrane // inferred from electronic annotation /// 0016021 // integral to membrane // inferred from electronic annotation /// 0016323 // basolateral plasma membrane // inferred from electronic annotation	0005215 // transporter activity // inferred from electronic annotation	---
Hacd2	0.00150322	10435383	1449342	Ptplb	788.258	1198.34	993.296	898.359	632.159	0.877442	1.89562	1.38653	765.259	1.29799	NM_023587	protein tyrosine phosphatase-like (proline instead of catalytic arginine), member b	0016311 // dephosphorylation // inferred from electronic annotation	0005783 // endoplasmic reticulum // inferred from electronic annotation /// 0005789 // endoplasmic reticulum membrane // inferred from electronic annotation /// 0016020 // membrane // inferred from electronic annotation /// 0016021 // integral to membrane // inferred from electronic annotation	0004725 // protein tyrosine phosphatase activity // inferred from electronic annotation /// 0005515 // protein binding // inferred from electronic annotation /// 0016791 // phosphatase activity // inferred from electronic annotation	---
Brca2	0.000175216	10527801	1419076	Brca2	113.578	111.818	112.698	75.73	86.8585	1.49977	1.28736	1.39357	81.2943	1.3863	NM_009765	breast cancer 2	0000724 // double-strand break repair via homologous recombination // inferred from mutant phenotype /// 0000724 // double-strand break repair via homologous recombination // inferred from electronic annotation /// 0001556 // oocyte maturation // inferred from mutant phenotype /// 0001833 // inner cell mass cell proliferation // inferred from mutant phenotype /// 0006281 // DNA repair // inferred…	0005634 // nucleus // inferred from direct assay /// 0005634 // nucleus // inferred from electronic annotation /// 0005737 // cytoplasm // inferred from direct assay /// 0005813 // centrosome // inferred from electronic annotation /// 0030141 // secretory granule // inferred from electronic annotation /// 0033593 // BRCA2-MAGE-D1 complex // inferred from electronic annotation	0003697 // single-stranded DNA binding // inferred from electronic annotation /// 0005515 // protein binding // inferred from sequence or structural similarity /// 0005515 // protein binding // inferred from electronic annotation /// 0005515 // protein binding // inferred from physical interaction /// 0016563 // transcription activator activity // inferred from electronic annotation /// 0043015 /…	---
Gnai1	0.011578	10528227	1434440	Gnai1	1065.18	848.09	956.638	916.841	519.747	1.1618	1.63174	1.39677	718.294	1.33182	BQ174580	guanine nucleotide binding protein (G protein), alpha inhibiting 1	0007165 // signal transduction // inferred from electronic annotation /// 0007186 // G-protein coupled receptor protein signaling pathway // traceable author statement /// 0007186 // G-protein coupled receptor protein signaling pathway // inferred from electronic annotation	0005622 // intracellular // inferred from direct assay	0000166 // nucleotide binding // inferred from electronic annotation /// 0003924 // GTPase activity // traceable author statement /// 0004871 // signal transducer activity // inferred from electronic annotation /// 0005515 // protein binding // inferred from electronic annotation /// 0005525 // GTP binding // inferred from electronic annotation /// 0019001 // guanyl nucleotide binding // inferred…	Calcium_regulation_in_cardiac_cells // GenMAPP /// G_Protein_Signaling // GenMAPP /// S1P_Signaling // GenMAPP
Snx2	0.0142182	10455738	1460224	Snx2	2847.02	2891.97	2869.5	2294.85	1860.13	1.24061	1.55472	1.39766	2077.49	1.38123	BC006960	sorting nexin 2	0006810 // transport // inferred from electronic annotation /// 0006886 // intracellular protein transport // inferred from electronic annotation /// 0007154 // cell communication // inferred from electronic annotation /// 0015031 // protein transport // inferred from electronic annotation	0005737 // cytoplasm // inferred from electronic annotation	0005515 // protein binding // inferred from electronic annotation /// 0008565 // protein transporter activity // inferred from electronic annotation /// 0035091 // phosphoinositide binding // inferred from electronic annotation	---
Lcmt1	0.011578	10557285	1417044	Lcmt1	1789.99	2055.92	1922.96	1474.46	1292.84	1.214	1.59023	1.40212	1383.65	1.38977	NM_025304	leucine carboxyl methyltransferase 1	0006481 // C-terminal protein amino acid methylation // not recorded /// 0006481 // C-terminal protein amino acid methylation // inferred from electronic annotation	---	0003880 // C-terminal protein carboxyl methyltransferase activity // not recorded /// 0003880 // C-terminal protein carboxyl methyltransferase activity // inferred from electronic annotation /// 0005515 // protein binding // inferred from electronic annotation /// 0008168 // methyltransferase activity // inferred from electronic annotation /// 0016740 // transferase activity // inferred from elec…	---
Rapgef6	0.00389482	10376163	1434509	Rapgef6	1036.83	909.981	973.405	914.965	543.267	1.13319	1.67502	1.4041	729.116	1.33505	BM250883	Rap guanine nucleotide exchange factor (GEF) 6	0007165 // signal transduction // inferred from electronic annotation /// 0007264 // small GTPase mediated signal transduction // inferred from electronic annotation /// 0051056 // regulation of small GTPase mediated signal transduction // inferred from electronic annotation	0005622 // intracellular // inferred from electronic annotation	0005085 // guanyl-nucleotide exchange factor activity // inferred from electronic annotation /// 0005515 // protein binding // inferred from electronic annotation	---
Murc	0.00192078	10504902	1420551	2310039E09Rik	6792.25	3977.12	5384.68	4079.17	3461.13	1.66511	1.14908	1.40709	3770.15	1.42824	NM_026509	RIKEN cDNA 2310039E09 gene	---	---	---	---
Cav1	0.000907061	10536499	1449145	Cav1	14088.3	13661.4	13874.9	11845.7	8397.24	1.18931	1.6269	1.4081	10121.5	1.37083	AB029929	caveolin 1, caveolae protein	0000165 // MAPKKK cascade // inferred from mutant phenotype /// 0000188 // inactivation of MAPK activity // inferred from mutant phenotype /// 0001570 // vasculogenesis // inferred from mutant phenotype /// 0001666 // response to hypoxia // inferred from mutant phenotype /// 0001937 // negative regulation of endothelial cell proliferation // inferred from mutant phenotype /// 0001960 // negative …	0000139 // Golgi membrane // inferred from electronic annotation /// 0000139 // Golgi membrane // inferred from sequence or structural similarity /// 0000299 // integral to membrane of membrane fraction // inferred from direct assay /// 0005783 // endoplasmic reticulum // inferred from sequence or structural similarity /// 0005794 // Golgi apparatus // inferred from electronic annotation /// 0005…	0005515 // protein binding // inferred from physical interaction /// 0016504 // protease activator activity // inferred from mutant phenotype	Integrin-mediated_cell_adhesion_KEGG // GenMAPP
Sdpr	0.0257197	10346164	1416778	Sdpr	7950.61	5233.88	6592.25	5347.5	3919.05	1.48679	1.3355	1.41114	4633.28	1.42281	BE197945	serum deprivation response	---	0005737 // cytoplasm // inferred from electronic annotation /// 0005829 // cytosol // inferred from electronic annotation /// 0005829 // cytosol // inferred from sequence or structural similarity	0001786 // phosphatidylserine binding // inferred from electronic annotation /// 0001786 // phosphatidylserine binding // inferred from sequence or structural similarity /// 0005515 // protein binding // inferred from electronic annotation /// 0005515 // protein binding // inferred from sequence or structural similarity /// 0008289 // lipid binding // inferred from electronic annotation	---
Zfp386	0.0257197	10399038	1451146	Zfp386	1918.46	1546.72	1732.59	1230.14	1224.6	1.55954	1.26304	1.41129	1227.37	1.41162	BC004747	zinc finger protein 386 (Kruppel-like)	0006355 // regulation of transcription, DNA-dependent // inferred from electronic annotation	0005622 // intracellular // inferred from electronic annotation /// 0005634 // nucleus // inferred from electronic annotation	0003676 // nucleic acid binding // inferred from electronic annotation /// 0003682 // chromatin binding // inferred from direct assay /// 0008270 // zinc ion binding // inferred from electronic annotation /// 0046872 // metal ion binding // inferred from electronic annotation	---
Adgra2	0.0211898	10571142	1418379	Gpr124	122.963	96.0684	109.516	87.0941	67.2317	1.41184	1.42892	1.42038	77.1629	1.41928	NM_054044	G protein-coupled receptor 124	0007165 // signal transduction // inferred from electronic annotation /// 0007166 // cell surface receptor linked signal transduction // inferred from electronic annotation /// 0007186 // G-protein coupled receptor protein signaling pathway // inferred from electronic annotation /// 0007218 // neuropeptide signaling pathway // inferred from electronic annotation	0005886 // plasma membrane // not recorded /// 0005886 // plasma membrane // inferred from electronic annotation /// 0016020 // membrane // inferred from electronic annotation /// 0016021 // integral to membrane // inferred from electronic annotation	0004871 // signal transducer activity // inferred from electronic annotation /// 0004872 // receptor activity // inferred from electronic annotation /// 0004888 // transmembrane receptor activity // inferred from electronic annotation /// 0004930 // G-protein coupled receptor activity // inferred from electronic annotation /// 0005515 // protein binding // inferred from electronic annotation	---
Gigyf2	0.00609984	10348201	1451856	Gigyf2	82.4446	144.53	113.487	125.195	66.1939	0.658531	2.18344	1.42098	95.6943	1.18594	BC006835	GRB10 interacting GYF protein 2	---	---	0005515 // protein binding // inferred from electronic annotation	---
Insig1	1.94e-05	10520362	1454671	Insig1	828.724	624.99	726.857	672.99	387.095	1.23141	1.61456	1.42298	530.043	1.37132	BB005488	insulin induced gene 1	0006629 // lipid metabolic process // inferred from electronic annotation /// 0006991 // response to sterol depletion // inferred from direct assay /// 0008202 // steroid metabolic process // inferred from electronic annotation /// 0008203 // cholesterol metabolic process // inferred from electronic annotation	0005783 // endoplasmic reticulum // traceable author statement /// 0005783 // endoplasmic reticulum // inferred from electronic annotation /// 0005789 // endoplasmic reticulum membrane // inferred from electronic annotation /// 0016020 // membrane // inferred from electronic annotation /// 0016021 // integral to membrane // inferred from electronic annotation	0005515 // protein binding // inferred from physical interaction	---
Mid1ip1	3.24e-06	10598638	1416840	Mid1ip1	4705.86	10627.6	7666.75	3249.7	7601.67	1.44809	1.39807	1.42308	5425.69	1.41305	NM_026524	Mid1 interacting protein 1 (gastrulation specific G12-like (zebrafish))	0007026 // negative regulation of microtubule depolymerization // inferred from genetic interaction	0005634 // nucleus // inferred from direct assay /// 0005634 // nucleus // inferred from electronic annotation /// 0005737 // cytoplasm // inferred from direct assay /// 0005737 // cytoplasm // inferred from electronic annotation /// 0005874 // microtubule // inferred from electronic annotation /// 0015630 // microtubule cytoskeleton // inferred from direct assay	0005515 // protein binding // inferred from physical interaction /// 0008022 // protein C-terminus binding // inferred from physical interaction	---
Ophn1	0.00192078	10605884	1419107	Ophn1	88.465	101.273	94.8692	76.4044	59.7106	1.15785	1.69607	1.42696	68.0575	1.39396	BI134110	oligophrenin 1	0007165 // signal transduction // inferred from electronic annotation /// 0030036 // actin cytoskeleton organization // inferred from direct assay	0005622 // intracellular // inferred from electronic annotation /// 0015629 // actin cytoskeleton // inferred from direct assay	0003779 // actin binding // inferred from direct assay /// 0005096 // GTPase activator activity // inferred from electronic annotation	---
Stambpl1	0.0173912	10462587	1418546	Stambpl1	197.126	148.047	172.586	163.955	89.1888	1.20231	1.65992	1.43112	126.572	1.36354	NM_029682	Stam binding protein like 1	0006511 // ubiquitin-dependent protein catabolic process // inferred from electronic annotation	---	0004221 // ubiquitin thiolesterase activity // inferred from electronic annotation /// 0008233 // peptidase activity // inferred from electronic annotation /// 0008237 // metallopeptidase activity // inferred from electronic annotation /// 0008270 // zinc ion binding // inferred from electronic annotation /// 0016787 // hydrolase activity // inferred from electronic annotation /// 0046872 // meta…	Smooth_muscle_contraction // GenMAPP /// Striated_muscle_contraction // GenMAPP
Pdcd4	0.00488493	10463997	1418840	Pdcd4	1533.72	930.15	1231.93	847.324	866.968	1.81007	1.07288	1.44147	857.146	1.43725	NM_011050	programmed cell death 4	0006915 // apoptosis // inferred from electronic annotation /// 0007049 // cell cycle // inferred from electronic annotation /// 0007569 // cell aging // inferred from sequence or structural similarity /// 0016481 // negative regulation of transcription // inferred from sequence or structural similarity /// 0043508 // negative regulation of JNK activity // inferred from sequence or structural sim…	0005634 // nucleus // inferred from electronic annotation /// 0005634 // nucleus // inferred from sequence or structural similarity /// 0005737 // cytoplasm // inferred from electronic annotation /// 0005737 // cytoplasm // inferred from sequence or structural similarity /// 0005829 // cytosol // inferred from sequence or structural similarity	0003723 // RNA binding // inferred from electronic annotation /// 0005515 // protein binding // inferred from physical interaction /// 0005515 // protein binding // inferred from sequence or structural similarity	---
Zfp867	0.00192078	10386394	1438079	BC050078	271.389	178.498	224.944	204.804	114.447	1.32512	1.55966	1.44239	159.625	1.4092	AV290754	cDNA sequence BC050078	0006355 // regulation of transcription, DNA-dependent // inferred from electronic annotation	0005622 // intracellular // inferred from electronic annotation /// 0005634 // nucleus // inferred from electronic annotation	0003676 // nucleic acid binding // inferred from electronic annotation /// 0008270 // zinc ion binding // inferred from electronic annotation /// 0046872 // metal ion binding // inferred from electronic annotation	---
Efhd1	0.000536109	10348194	1448507	Efhd1	428.434	263.049	345.741	312.207	173.672	1.37227	1.51463	1.44345	242.939	1.42316	BC019531	EF hand domain containing 1	0031175 // neurite development // inferred from mutant phenotype	0005743 // mitochondrial inner membrane // inferred from direct assay	0005509 // calcium ion binding // inferred from electronic annotation /// 0005515 // protein binding // inferred from electronic annotation	---
Zfp799	3.24e-06	10449926	1437873	Zfp799	328.304	247.365	287.834	197.683	199.242	1.66076	1.24153	1.45115	198.462	1.45032	BB044772	zinc finger protein 799	0006355 // regulation of transcription, DNA-dependent // inferred from electronic annotation /// 0006508 // proteolysis // inferred from electronic annotation	0005622 // intracellular // inferred from electronic annotation /// 0005634 // nucleus // inferred from electronic annotation	0003676 // nucleic acid binding // inferred from electronic annotation /// 0008237 // metallopeptidase activity // inferred from electronic annotation /// 0008270 // zinc ion binding // inferred from electronic annotation /// 0046872 // metal ion binding // inferred from electronic annotation	---
Zfp97	0.011578	10442037	1449972	BC018101 /// Zfp97	762.881	393.874	578.377	401.237	390.606	1.90132	1.00837	1.45484	395.922	1.46084	NM_011765	cDNA sequence BC018101 /// zinc finger protein 97	0006355 // regulation of transcription, DNA-dependent // inferred from electronic annotation	0005622 // intracellular // inferred from electronic annotation /// 0005634 // nucleus // inferred from direct assay /// 0005634 // nucleus // inferred from electronic annotation	0003676 // nucleic acid binding // inferred from electronic annotation /// 0003677 // DNA binding // inferred from electronic annotation /// 0008270 // zinc ion binding // inferred from electronic annotation /// 0046872 // metal ion binding // inferred from electronic annotation	---
Ssfa2	0.00758419	10473160	1423613	Ssfa2	1413.62	1678.3	1545.96	1229.79	952.892	1.14949	1.76127	1.45538	1091.34	1.41657	BB033597	sperm specific antigen 2	---	0005737 // cytoplasm // inferred from electronic annotation	---	---
Zfp874a	0.011578	10410321	1434171	C330011K17Rik	412.337	432.725	422.531	311.721	272.346	1.32277	1.58888	1.45583	292.033	1.44686	BB398891	RIKEN cDNA C330011K17 gene	0006355 // regulation of transcription, DNA-dependent // inferred from electronic annotation	0005622 // intracellular // inferred from electronic annotation /// 0005634 // nucleus // inferred from electronic annotation	0003676 // nucleic acid binding // inferred from electronic annotation /// 0008270 // zinc ion binding // inferred from electronic annotation /// 0046872 // metal ion binding // inferred from electronic annotation	---
Pikfyve	0.0211898	10346970	1452994	Pip5k3	581.021	543.603	562.312	417.716	348.246	1.39095	1.56098	1.47596	382.981	1.46825	AK017225	phosphatidylinositol-3-phosphate/phosphatidylinositol 5-kinase, type III	0007242 // intracellular signaling cascade // inferred from direct assay /// 0007242 // intracellular signaling cascade // inferred from electronic annotation /// 0044267 // cellular protein metabolic process // inferred from electronic annotation /// 0046488 // phosphatidylinositol metabolic process // inferred from electronic annotation	0005829 // cytosol // inferred from direct assay /// 0012506 // vesicle membrane // inferred from direct assay /// 0016020 // membrane // inferred from electronic annotation /// 0030659 // cytoplasmic vesicle membrane // inferred from electronic annotation /// 0031410 // cytoplasmic vesicle // inferred from direct assay /// 0031410 // cytoplasmic vesicle // inferred from electronic annotation ///…	0005515 // protein binding // inferred from physical interaction /// 0005515 // protein binding // inferred from electronic annotation /// 0005524 // ATP binding // inferred from electronic annotation /// 0008270 // zinc ion binding // inferred from direct assay /// 0008270 // zinc ion binding // inferred from electronic annotation /// 0016301 // kinase activity // inferred from electronic annota…	---
Rell1	0.0257197	10530130	1452359	Rell1	1256.47	1322.16	1289.32	807.968	940.671	1.5551	1.40556	1.48033	874.32	1.47465	BI248354	RELT-like 1	---	0016020 // membrane // inferred from electronic annotation /// 0016021 // integral to membrane // inferred from electronic annotation	---	---
Map4k3	0.0257197	10453178	1426759	Map4k3	3164.1	2693.29	2928.7	2043.41	1897.09	1.54844	1.4197	1.48407	1970.25	1.48646	BF165548	mitogen-activated protein kinase kinase kinase kinase 3	0006468 // protein amino acid phosphorylation // inferred from electronic annotation /// 0006468 // protein amino acid phosphorylation // inferred from sequence or structural similarity /// 0006950 // response to stress // inferred from electronic annotation /// 0006950 // response to stress // inferred from sequence or structural similarity /// 0007243 // protein kinase cascade // inferred from …	---	0000166 // nucleotide binding // inferred from electronic annotation /// 0004672 // protein kinase activity // inferred from electronic annotation /// 0004674 // protein serine/threonine kinase activity // inferred from electronic annotation /// 0004674 // protein serine/threonine kinase activity // inferred from sequence or structural similarity /// 0005083 // small GTPase regulator activity // …	---
Zfp39	0.000907061	10386219	1441198	Zfp39	378.737	263.905	321.321	239.784	189.071	1.57949	1.39579	1.48764	214.428	1.4985	BB311524	zinc finger protein 39	0006350 // transcription // inferred from electronic annotation /// 0006355 // regulation of transcription, DNA-dependent // inferred from electronic annotation /// 0007275 // multicellular organismal development // inferred from electronic annotation /// 0007283 // spermatogenesis // inferred from electronic annotation /// 0030154 // cell differentiation // inferred from electronic annotation	0005622 // intracellular // inferred from electronic annotation /// 0005634 // nucleus // inferred from electronic annotation	0003676 // nucleic acid binding // inferred from electronic annotation /// 0003677 // DNA binding // inferred from electronic annotation /// 0008270 // zinc ion binding // inferred from electronic annotation /// 0046872 // metal ion binding // inferred from electronic annotation	---
Tspan12	0.00939007	10543306	1454604	Tspan12	251.442	178.724	215.083	184.637	110.326	1.36182	1.61997	1.49089	147.481	1.45837	BB072896	tetraspanin 12	---	0016020 // membrane // inferred from electronic annotation /// 0016021 // integral to membrane // inferred from electronic annotation	---	---
Fgd4	0.00488493	10438017	1425037	Fgd4	134.002	81.2472	107.625	62.8335	92.5169	2.13265	0.878187	1.50542	77.6752	1.38557	AF402611	FYVE, RhoGEF and PH domain containing 4	0007257 // activation of JNK activity // not recorded /// 0030032 // lamellipodium assembly // inferred from direct assay /// 0030035 // microspike assembly // inferred from direct assay /// 0035023 // regulation of Rho protein signal transduction // inferred from electronic annotation	0005622 // intracellular // inferred from electronic annotation /// 0005737 // cytoplasm // inferred from electronic annotation /// 0005856 // cytoskeleton // inferred from electronic annotation /// 0030027 // lamellipodium // inferred from direct assay /// 0030175 // filopodium // inferred from direct assay /// 0042995 // cell projection // inferred from electronic annotation	0003779 // actin binding // not recorded /// 0003779 // actin binding // inferred from electronic annotation /// 0005085 // guanyl-nucleotide exchange factor activity // inferred from electronic annotation /// 0005089 // Rho guanyl-nucleotide exchange factor activity // inferred from electronic annotation /// 0008270 // zinc ion binding // inferred from electronic annotation /// 0046872 // metal …	---
Trpm7	5.2e-05	10487277	1416799	Trpm7	1644.61	1977.98	1811.3	1150.81	1249.85	1.42909	1.58257	1.50583	1200.33	1.509	AV320241	transient receptor potential cation channel, subfamily M, member 7	0006468 // protein amino acid phosphorylation // inferred from direct assay /// 0006468 // protein amino acid phosphorylation // inferred from electronic annotation /// 0006810 // transport // inferred from electronic annotation /// 0006811 // ion transport // inferred from electronic annotation /// 0006816 // calcium ion transport // inferred from direct assay /// 0006816 // calcium ion transpor…	0001726 // ruffle // inferred from direct assay /// 0005886 // plasma membrane // inferred from direct assay /// 0016020 // membrane // inferred from electronic annotation /// 0016021 // integral to membrane // inferred from electronic annotation	0000166 // nucleotide binding // inferred from electronic annotation /// 0003779 // actin binding // inferred from direct assay /// 0004674 // protein serine/threonine kinase activity // inferred from electronic annotation /// 0004872 // receptor activity // inferred from electronic annotation /// 0005216 // ion channel activity // inferred from electronic annotation /// 0005262 // calcium channe…	---
Hbp1	0.00023376	10399897	1446269	Hbp1	63.5981	64.1754	63.8867	57.4886	33.0153	1.10627	1.94381	1.52504	45.2519	1.4118	BB399042	high mobility group box transcription factor 1	0006350 // transcription // inferred from electronic annotation /// 0006355 // regulation of transcription, DNA-dependent // inferred from electronic annotation /// 0016055 // Wnt receptor signaling pathway // inferred from electronic annotation	0005634 // nucleus // inferred from electronic annotation	0003677 // DNA binding // inferred from electronic annotation /// 0005488 // binding // inferred from electronic annotation /// 0005515 // protein binding // inferred from physical interaction	---
2610301B20Rik	0.0257197	10503251	1429451	2610301B20Rik	310.893	304.671	307.782	250.634	166.766	1.24042	1.82694	1.53368	208.7	1.47476	AK011950	RIKEN cDNA 2610301B20 gene	---	---	---	---
Zfp942	0.00939007	10448195	1455433	3110048L19Rik	352.222	237.564	294.893	185.894	202.12	1.89475	1.17536	1.53505	194.007	1.52001	BM241540	RIKEN cDNA 3110048L19 gene	0006355 // regulation of transcription, DNA-dependent // inferred from electronic annotation	0005622 // intracellular // inferred from electronic annotation /// 0005634 // nucleus // inferred from electronic annotation	0003676 // nucleic acid binding // inferred from electronic annotation /// 0008270 // zinc ion binding // inferred from electronic annotation /// 0046872 // metal ion binding // inferred from electronic annotation	---
Malt1	0.00939007	10456296	1456126	Malt1	110.113	101.199	105.656	123.513	45.9985	0.891507	2.20005	1.54578	84.7559	1.24659	BB485735	mucosa associated lymphoid tissue lymphoma translocation gene 1	0001923 // B-1 B cell differentiation // inferred from mutant phenotype /// 0002237 // response to molecule of bacterial origin // inferred from expression pattern /// 0002726 // positive regulation of T cell cytokine production // inferred from electronic annotation /// 0006508 // proteolysis // inferred from electronic annotation /// 0006511 // ubiquitin-dependent protein catabolic process // i…	0005634 // nucleus // inferred from electronic annotation /// 0005737 // cytoplasm // inferred from electronic annotation /// 0005829 // cytosol // inferred from direct assay	0004197 // cysteine-type endopeptidase activity // inferred from electronic annotation /// 0004842 // ubiquitin-protein ligase activity // inferred from electronic annotation /// 0004871 // signal transducer activity // inferred from electronic annotation /// 0005515 // protein binding // inferred from physical interaction /// 0005515 // protein binding // inferred from electronic annotation /// …	---
Bmper	0.0257197	10583870	1429273	Bmper	585.409	752.776	669.093	429.567	434.951	1.36279	1.73071	1.54675	432.259	1.5479	AK014221	BMP-binding endothelial regulator	0030514 // negative regulation of BMP signaling pathway // inferred from direct assay	0005576 // extracellular region // inferred from direct assay /// 0005576 // extracellular region // inferred from electronic annotation	0005515 // protein binding // inferred from physical interaction	---
Exoc6	0.0257197	10462822	1424230	Exoc6	751.511	445.303	598.407	397.232	365.991	1.89187	1.2167	1.55429	381.611	1.5681	BC026859	exocyst complex component 6	0006810 // transport // inferred from electronic annotation /// 0006887 // exocytosis // inferred from electronic annotation /// 0006904 // vesicle docking during exocytosis // inferred from electronic annotation /// 0015031 // protein transport // inferred from electronic annotation	0000145 // exocyst // inferred from electronic annotation	---	---
Add3	0.00939007	10463911	1423298	Add3	4537.71	3519.65	4028.68	3130.68	2111.79	1.44943	1.66667	1.55805	2621.23	1.53694	BM239842	adducin 3 (gamma)	---	0000794 // condensed nuclear chromosome // inferred from direct assay /// 0005737 // cytoplasm // inferred from direct assay /// 0005737 // cytoplasm // inferred from electronic annotation /// 0005856 // cytoskeleton // inferred from direct assay /// 0005856 // cytoskeleton // inferred from electronic annotation /// 0005886 // plasma membrane // inferred from electronic annotation /// 0005911 // …	0003779 // actin binding // inferred from electronic annotation /// 0005198 // structural molecule activity // inferred from direct assay /// 0005516 // calmodulin binding // inferred from electronic annotation /// 0046872 // metal ion binding // inferred from electronic annotation	---
Pparg	0.00150322	10540897	1420715	Pparg	367.142	500.279	433.711	332.38	248.251	1.10458	2.01521	1.5599	290.316	1.49393	NM_011146	peroxisome proliferator activated receptor gamma	0000122 // negative regulation of transcription from RNA polymerase II promoter // inferred from direct assay /// 0001890 // placenta development // inferred from mutant phenotype /// 0006350 // transcription // inferred from electronic annotation /// 0006355 // regulation of transcription, DNA-dependent // inferred from electronic annotation /// 0006954 // inflammatory response // traceable auth…	0005634 // nucleus // inferred from direct assay /// 0005634 // nucleus // inferred from electronic annotation /// 0005829 // cytosol // inferred from direct assay /// 0017053 // transcriptional repressor complex // inferred by curator	0003677 // DNA binding // inferred from direct assay /// 0003677 // DNA binding // inferred from physical interaction /// 0003677 // DNA binding // inferred from electronic annotation /// 0003700 // transcription factor activity // inferred from direct assay /// 0003700 // transcription factor activity // inferred from electronic annotation /// 0003707 // steroid hormone receptor activity // infe…	Nuclear_Receptors // GenMAPP
H2-Q4	0.0173912	10444814	1451644	0610037M15Rik /// H2-gs10 /// H2-L /// H2-Q1 /// H2-Q6 /// LOC100044307 /// LOC676708	71.7178	77.9204	74.8191	49.7883	46.0573	1.44045	1.69182	1.56614	47.9228	1.56124	BC010602	RIKEN cDNA 0610037M15 gene /// MHC class I like protein GS10 /// histocompatibility 2, D region /// histocompatibility 2, Q region locus 1 /// histocompatibility 2, Q region locus 6 /// hypothetical protein LOC100044307 /// similar to H-2 class I histocompatibility antigen, L-D alpha chain precursor	0002474 // antigen processing and presentation of peptide antigen via MHC class I // inferred from electronic annotation /// 0006952 // defense response // traceable author statement /// 0006955 // immune response // inferred from electronic annotation /// 0019882 // antigen processing and presentation // inferred from electronic annotation /// 0019885 // antigen processing and presentation of en…	0009986 // cell surface // inferred from direct assay /// 0016020 // membrane // inferred from electronic annotation /// 0016021 // integral to membrane // inferred from electronic annotation /// 0042612 // MHC class I protein complex // inferred from electronic annotation	0042605 // peptide antigen binding // inferred by curator /// 0042605 // peptide antigen binding // inferred from direct assay	---
Lsm1	0.0142182	10571048	1423873	Lsm1	1682.22	1137.07	1409.64	907.565	880.429	1.85355	1.29149	1.57252	893.997	1.57679	BC021460	LSM1 homolog, U6 small nuclear RNA associated (S. cerevisiae)	0006397 // mRNA processing // inferred from electronic annotation /// 0008380 // RNA splicing // inferred from electronic annotation	0005634 // nucleus // inferred from sequence or structural similarity /// 0005634 // nucleus // inferred from electronic annotation /// 0005737 // cytoplasm // inferred from sequence or structural similarity /// 0030529 // ribonucleoprotein complex // inferred from electronic annotation	0003723 // RNA binding // inferred from electronic annotation /// 0005515 // protein binding // inferred from electronic annotation	mRNA_processing_binding_Reactome // GenMAPP
Cap1	0.00117065	10516051	1417461	Cap1	53.8142	58.742	56.2781	32.0414	39.6041	1.67952	1.48323	1.58138	35.8227	1.57102	NM_007598	CAP, adenylate cyclase-associated protein 1 (yeast)	0000902 // cell morphogenesis // inferred from genetic interaction /// 0001667 // ameboidal cell migration // inferred from mutant phenotype /// 0006898 // receptor-mediated endocytosis // inferred from mutant phenotype /// 0007010 // cytoskeleton organization // inferred from electronic annotation /// 0030036 // actin cytoskeleton organization // inferred from mutant phenotype	0005737 // cytoplasm // inferred from direct assay /// 0005886 // plasma membrane // inferred from electronic annotation /// 0016020 // membrane // inferred from electronic annotation /// 0030864 // cortical actin cytoskeleton // inferred from direct assay	0003779 // actin binding // inferred from electronic annotation /// 0005488 // binding // inferred from electronic annotation	---
Anxa3	0.0173912	10523451	1460330	Anxa3	3695.52	2859.97	3277.74	2423.53	1718.05	1.52485	1.66466	1.59475	2070.79	1.58285	AW702161	annexin A3	---	---	0004859 // phospholipase inhibitor activity // inferred from electronic annotation /// 0005509 // calcium ion binding // inferred from electronic annotation /// 0005544 // calcium-dependent phospholipid binding // inferred from electronic annotation /// 0019834 // phospholipase A2 inhibitor activity // inferred from electronic annotation	Prostaglandin_synthesis_regulation // GenMAPP
Cd200	0.00609984	10439651	1448788	Cd200	2055.77	1546.11	1800.94	1091.53	1170.72	1.88338	1.32065	1.60201	1131.12	1.59216	AF004023	CD200 antigen	---	0005886 // plasma membrane // inferred from electronic annotation /// 0016020 // membrane // inferred from electronic annotation /// 0016021 // integral to membrane // inferred from electronic annotation	0005515 // protein binding // inferred from physical interaction	---
Rgs19	0.00150322	10490736	1417786	Rgs19	306.925	529.985	418.455	363.761	222.168	0.843753	2.38552	1.61463	292.965	1.42835	BC003838	regulator of G-protein signaling 19	0009968 // negative regulation of signal transduction // inferred from electronic annotation	0016020 // membrane // inferred from electronic annotation	0004871 // signal transducer activity // inferred from electronic annotation /// 0005515 // protein binding // inferred from physical interaction /// 0005515 // protein binding // inferred from electronic annotation	Calcium_regulation_in_cardiac_cells // GenMAPP /// Smooth_muscle_contraction // GenMAPP
Gulp1	0.0257197	10346000	1453771	Gulp1	535.745	518.732	527.239	493.911	241.002	1.0847	2.1524	1.61855	367.457	1.43483	BF144687	GULP, engulfment adaptor PTB domain containing 1	0006810 // transport // inferred from electronic annotation /// 0006869 // lipid transport // inferred from electronic annotation /// 0006909 // phagocytosis // inferred from electronic annotation /// 0006911 // phagocytosis, engulfment // not recorded /// 0006911 // phagocytosis, engulfment // inferred from electronic annotation /// 0006915 // apoptosis // inferred from electronic annotation ///…	0005737 // cytoplasm // inferred from electronic annotation	0005515 // protein binding // not recorded /// 0005515 // protein binding // inferred from electronic annotation /// 0016491 // oxidoreductase activity // inferred from electronic annotation	---
Msmo1	0.00309146	10578916	1423078	Sc4mol	673.005	436.076	554.541	444.759	239.797	1.51319	1.81852	1.66586	342.278	1.62015	AK005441	sterol-C4-methyl oxidase-like	0006633 // fatty acid biosynthetic process // inferred from electronic annotation /// 0006694 // steroid biosynthetic process // inferred from electronic annotation /// 0008610 // lipid biosynthetic process // inferred from electronic annotation /// 0016126 // sterol biosynthetic process // inferred from electronic annotation /// 0055114 // oxidation reduction // inferred from electronic annotati…	0005783 // endoplasmic reticulum // inferred from electronic annotation /// 0005789 // endoplasmic reticulum membrane // inferred from electronic annotation /// 0016020 // membrane // inferred from electronic annotation /// 0016021 // integral to membrane // inferred from electronic annotation	0000254 // C-4 methylsterol oxidase activity // inferred from electronic annotation /// 0005506 // iron ion binding // inferred from electronic annotation /// 0016491 // oxidoreductase activity // inferred from electronic annotation	Cholesterol_Biosynthesis // GenMAPP
Myl12b	0.011578	10452639	1428608	Mylc2b	4525.23	3765.8	4145.51	3049.55	2028.53	1.4839	1.85641	1.67016	2539.04	1.63271	AW494458	myosin light chain, regulatory B	---	0016459 // myosin complex // inferred from electronic annotation /// 0043234 // protein complex // inferred from electronic annotation /// 0045177 // apical part of cell // inferred from direct assay	0003774 // motor activity // inferred from electronic annotation /// 0005509 // calcium ion binding // inferred from electronic annotation	---
Cetn3	0.0257197	10406426	1417239	Cetn3	2770.33	2092.48	2431.4	1448.17	1427.19	1.91299	1.46615	1.68957	1437.68	1.6912	BC002162	centrin 3	0007049 // cell cycle // inferred from electronic annotation /// 0007067 // mitosis // inferred from electronic annotation /// 0051301 // cell division // inferred from electronic annotation	0005813 // centrosome // inferred from electronic annotation /// 0005814 // centriole // inferred from direct assay /// 0005932 // microtubule basal body // inferred from direct assay /// 0032391 // photoreceptor connecting cilium // inferred from direct assay	0005509 // calcium ion binding // inferred from electronic annotation /// 0031683 // G-protein beta/gamma-subunit binding // inferred from direct assay	---
Tmem106b	0.00244254	10536429	1452290	Tmem106b	1996.45	1522.52	1759.48	1202.18	882.795	1.66068	1.72466	1.69267	1042.49	1.68777	AK009646	transmembrane protein 106B	---	0016020 // membrane // inferred from electronic annotation /// 0016021 // integral to membrane // inferred from electronic annotation	---	---
Eci1	0.00758419	10442445	1418321	Dci	9178.99	8723.74	8951.37	5371.91	5163.73	1.7087	1.68943	1.69906	5267.82	1.69925	NM_010023	dodecenoyl-Coenzyme A delta isomerase (3,2 trans-enoyl-Coenyme A isomerase)	0006629 // lipid metabolic process // inferred from electronic annotation /// 0006631 // fatty acid metabolic process // inferred from electronic annotation /// 0006635 // fatty acid beta-oxidation // inferred from mutant phenotype /// 0008152 // metabolic process // inferred from electronic annotation	0005739 // mitochondrion // inferred from direct assay /// 0005739 // mitochondrion // traceable author statement /// 0005739 // mitochondrion // inferred from electronic annotation /// 0005743 // mitochondrial inner membrane // inferred from direct assay /// 0005759 // mitochondrial matrix // inferred from electronic annotation	0003824 // catalytic activity // inferred from electronic annotation /// 0004165 // dodecenoyl-CoA delta-isomerase activity // inferred from direct assay /// 0004165 // dodecenoyl-CoA delta-isomerase activity // inferred from electronic annotation /// 0016853 // isomerase activity // inferred from electronic annotation	Mitochondrial_fatty_acid_betaoxidation // GenMAPP
Grtp1	0.00609984	10577114	1425891	Grtp1	658.01	365.041	511.525	302.144	287.466	2.1778	1.26986	1.72383	294.805	1.73513	AF329833	GH regulated TBC protein 1	0032313 // regulation of Rab GTPase activity // inferred from electronic annotation	0005622 // intracellular // inferred from electronic annotation	0005096 // GTPase activator activity // inferred from electronic annotation /// 0005097 // Rab GTPase activator activity // inferred from electronic annotation	---
Asap2	0.010484	10394862	1431369	Ddef2	66.3308	43.5046	54.9177	55.2401	19.3231	1.20077	2.25143	1.7261	37.2816	1.47305	BM944240	development and differentiation enhancing factor 2	0032312 // regulation of ARF GTPase activity // inferred from electronic annotation	0005737 // cytoplasm // inferred from electronic annotation /// 0005794 // Golgi apparatus // inferred from electronic annotation /// 0005886 // plasma membrane // inferred from electronic annotation /// 0016020 // membrane // inferred from electronic annotation	0005096 // GTPase activator activity // inferred from electronic annotation /// 0008060 // ARF GTPase activator activity // inferred from electronic annotation /// 0008270 // zinc ion binding // inferred from electronic annotation /// 0046872 // metal ion binding // inferred from electronic annotation	---
Zfp952	0.0257197	10443918	1457677	C920016K16Rik	308.033	343.342	325.688	255.374	145.921	1.20621	2.35293	1.77957	200.647	1.62319	BM938122	RIKEN cDNA C920016K16 gene	0006355 // regulation of transcription, DNA-dependent // inferred from electronic annotation	0005622 // intracellular // inferred from electronic annotation /// 0005634 // nucleus // inferred from electronic annotation	0003676 // nucleic acid binding // inferred from electronic annotation /// 0008270 // zinc ion binding // inferred from electronic annotation /// 0046872 // metal ion binding // inferred from electronic annotation	---
Rmdn1	0.00309146	10503484	1418658	Fam82b	7335.5	4240.61	5788.06	3279.38	3167.73	2.23685	1.33869	1.78777	3223.56	1.79555	BC025158	family with sequence similarity 82, member B	---	0005737 // cytoplasm // inferred from electronic annotation /// 0005874 // microtubule // inferred from electronic annotation	0005488 // binding // inferred from electronic annotation	---
Pid1	0.00758419	10356172	1436999	5033414K04Rik	1497.49	1065.21	1281.35	895.795	559.129	1.67169	1.90513	1.78841	727.462	1.7614	AI504908	RIKEN cDNA 5033414K04 gene	---	0005737 // cytoplasm // inferred from electronic annotation	---	---
N6amt1	0.00758419	10436698	1453821	N6amt1	365.63	253.891	309.76	219.562	130.129	1.66527	1.95106	1.80816	174.846	1.77162	BQ033064	N-6 adenine-specific DNA methyltransferase 1 (putative)	0032259 // methylation // inferred from electronic annotation	---	0003676 // nucleic acid binding // inferred from electronic annotation /// 0008168 // methyltransferase activity // inferred from electronic annotation /// 0016740 // transferase activity // inferred from electronic annotation	---
Actb	0.00117065	10535381	1419734	Actb	4564.96	4244.62	4404.79	2409.59	2425.25	1.89449	1.75018	1.82234	2417.42	1.8221	NM_007393	actin, beta	0051592 // response to calcium ion // inferred from electronic annotation	0005625 // soluble fraction // inferred from direct assay /// 0005737 // cytoplasm // inferred from electronic annotation /// 0005829 // cytosol // inferred from direct assay /// 0005856 // cytoskeleton // inferred from electronic annotation /// 0030863 // cortical cytoskeleton // inferred from direct assay /// 0035267 // NuA4 histone acetyltransferase complex // inferred from electronic annotati…	0000166 // nucleotide binding // inferred from electronic annotation /// 0005515 // protein binding // inferred from electronic annotation /// 0005524 // ATP binding // inferred from electronic annotation /// 0042802 // identical protein binding // inferred from electronic annotation	Smooth_muscle_contraction // GenMAPP
Acaa2	0.011578	10456699	1428145	Acaa2	5377.76	3985.75	4681.75	2352.81	2932.55	2.28567	1.35914	1.82241	2642.68	1.77159	AK002555	acetyl-Coenzyme A acyltransferase 2 (mitochondrial 3-oxoacyl-Coenzyme A thiolase)	0006629 // lipid metabolic process // inferred from electronic annotation /// 0006631 // fatty acid metabolic process // inferred from electronic annotation /// 0008152 // metabolic process // inferred from electronic annotation	0005739 // mitochondrion // inferred from direct assay /// 0005739 // mitochondrion // inferred from electronic annotation /// 0005743 // mitochondrial inner membrane // inferred from direct assay	0003824 // catalytic activity // inferred from electronic annotation /// 0003988 // acetyl-CoA C-acyltransferase activity // inferred from electronic annotation /// 0008415 // acyltransferase activity // inferred from electronic annotation /// 0016740 // transferase activity // inferred from electronic annotation	---
Zfp398	0.0158047	10537911	1457688	Zfp398	5.7494	99.4933	52.6214	6.45995	33.8374	0.890007	2.94034	1.91517	20.1487	2.61166	AV343776	zinc finger protein 398	0006355 // regulation of transcription, DNA-dependent // inferred from electronic annotation	0005622 // intracellular // inferred from electronic annotation /// 0005634 // nucleus // inferred from electronic annotation	0003676 // nucleic acid binding // inferred from electronic annotation /// 0008270 // zinc ion binding // inferred from electronic annotation /// 0046872 // metal ion binding // inferred from electronic annotation	---
Mc2r	0.0211898	10459611	1422926	Mc2r	109.664	87.525	98.5945	87.7292	32.6552	1.25003	2.68028	1.96515	60.1922	1.638	NM_008560	melanocortin 2 receptor	0007165 // signal transduction // inferred from electronic annotation /// 0007186 // G-protein coupled receptor protein signaling pathway // inferred from electronic annotation	0005886 // plasma membrane // inferred from electronic annotation /// 0016020 // membrane // inferred from electronic annotation /// 0016021 // integral to membrane // inferred from electronic annotation	0004871 // signal transducer activity // inferred from electronic annotation /// 0004872 // receptor activity // inferred from electronic annotation /// 0004930 // G-protein coupled receptor activity // inferred from electronic annotation /// 0004977 // melanocortin receptor activity // inferred from electronic annotation /// 0004978 // adrenocorticotropin receptor activity // inferred from elect…	GPCRDB_Class_A_Rhodopsin-like // GenMAPP /// Peptide_GPCRs // GenMAPP
Trim13	0.00758419	10415784	1417888	Trim13	1985.89	1133.12	1559.51	782.181	761.98	2.53892	1.48708	2.013	772.08	2.01988	NM_023233	tripartite motif-containing 13	0007049 // cell cycle // inferred from electronic annotation /// 0043123 // positive regulation of I-kappaB kinase/NF-kappaB cascade // inferred from electronic annotation /// 0045786 // negative regulation of cell cycle // inferred from electronic annotation	0005622 // intracellular // inferred from electronic annotation /// 0005737 // cytoplasm // inferred from direct assay	0004871 // signal transducer activity // inferred from electronic annotation /// 0005515 // protein binding // inferred from electronic annotation /// 0008270 // zinc ion binding // inferred from electronic annotation /// 0046872 // metal ion binding // inferred from electronic annotation	---
Gabpb2	0.00117065	10500103	1440868	Gabpb2	28.2508	50.1291	39.1899	16.9878	20.6502	1.66301	2.42754	2.04527	18.819	2.08247	BB287989	GA repeat binding protein, beta 2	0006350 // transcription // inferred from electronic annotation /// 0006355 // regulation of transcription, DNA-dependent // inferred from electronic annotation	0005634 // nucleus // inferred from electronic annotation	0042803 // protein homodimerization activity // inferred from direct assay	---
Hdac7	0.00150322	10432006	1420812	Hdac7	63.2024	109.093	86.1477	19.4568	124.843	3.24835	0.873844	2.0611	72.1497	1.19401	BB277517	histone deacetylase 7	0000122 // negative regulation of transcription from RNA polymerase II promoter // inferred from direct assay /// 0006350 // transcription // inferred from electronic annotation /// 0006355 // regulation of transcription, DNA-dependent // inferred from electronic annotation /// 0006954 // inflammatory response // traceable author statement /// 0007399 // nervous system development // traceable au…	0000118 // histone deacetylase complex // traceable author statement /// 0000118 // histone deacetylase complex // inferred from electronic annotation /// 0005634 // nucleus // traceable author statement /// 0005634 // nucleus // inferred from electronic annotation /// 0005737 // cytoplasm // traceable author statement /// 0005737 // cytoplasm // inferred from electronic annotation	0003714 // transcription corepressor activity // inferred from direct assay /// 0004407 // histone deacetylase activity // traceable author statement /// 0004407 // histone deacetylase activity // inferred from electronic annotation /// 0005515 // protein binding // inferred from physical interaction /// 0005515 // protein binding // not recorded /// 0005515 // protein binding // traceable author…	Cell_Cycle_KEGG // GenMAPP
Ctgf	0.00023376	10362201	1416953	Ctgf	3269.27	3031.12	3150.2	1319.93	1793.55	2.47686	1.69002	2.08344	1556.74	2.02359	NM_010217	connective tissue growth factor	0001502 // cartilage condensation // inferred from direct assay /// 0001503 // ossification // inferred from mutant phenotype /// 0001525 // angiogenesis // inferred from direct assay /// 0001525 // angiogenesis // inferred from mutant phenotype /// 0001558 // regulation of cell growth // inferred from electronic annotation /// 0006260 // DNA replication // inferred from electronic annotation ///…	0005576 // extracellular region // inferred from direct assay /// 0005576 // extracellular region // inferred from electronic annotation /// 0005578 // proteinaceous extracellular matrix // inferred from direct assay /// 0005578 // proteinaceous extracellular matrix // inferred from electronic annotation	0005178 // integrin binding // inferred from direct assay /// 0005515 // protein binding // inferred from electronic annotation /// 0005520 // insulin-like growth factor binding // inferred from electronic annotation /// 0008083 // growth factor activity // inferred from electronic annotation /// 0008201 // heparin binding // inferred from direct assay /// 0008201 // heparin binding // inferred f…	---
Nr6a1	0.011578	10482249	1421515	Nr6a1	5.44962	9.79383	7.62173	1.62267	10.168	3.35843	0.963198	2.16082	5.89535	1.29284	U09563	nuclear receptor subfamily 6, group A, member 1	0000122 // negative regulation of transcription from RNA polymerase II promoter // inferred from direct assay /// 0000122 // negative regulation of transcription from RNA polymerase II promoter // inferred from mutant phenotype /// 0006350 // transcription // inferred from electronic annotation /// 0006355 // regulation of transcription, DNA-dependent // inferred from electronic annotation /// 00…	0005634 // nucleus // inferred from electronic annotation /// 0005667 // transcription factor complex // inferred from direct assay	0003677 // DNA binding // inferred from direct assay /// 0003677 // DNA binding // inferred from electronic annotation /// 0003700 // transcription factor activity // inferred from electronic annotation /// 0003707 // steroid hormone receptor activity // inferred from electronic annotation /// 0004872 // receptor activity // inferred from electronic annotation /// 0004879 // ligand-dependent nucl…	---
Coq10b	9.47e-09	10346298	1428487	Coq10b	811.118	706.071	758.594	296.423	435.213	2.73635	1.62236	2.17936	365.818	2.0737	AK002294	coenzyme Q10 homolog B (S. cerevisiae)	---	0005739 // mitochondrion // inferred from electronic annotation	---	---
Acat1	0.00939007	10593591	1424182	Acat1	8687.11	5993.17	7340.14	3832.05	2809.85	2.26696	2.13291	2.19994	3320.95	2.21025	BG070487	acetyl-Coenzyme A acetyltransferase 1	0008152 // metabolic process // inferred from electronic annotation	0005739 // mitochondrion // inferred from direct assay /// 0005739 // mitochondrion // inferred from electronic annotation /// 0005743 // mitochondrial inner membrane // inferred from direct assay	0003824 // catalytic activity // inferred from electronic annotation /// 0003985 // acetyl-CoA C-acetyltransferase activity // inferred from direct assay /// 0003985 // acetyl-CoA C-acetyltransferase activity // inferred from electronic annotation /// 0005515 // protein binding // inferred from electronic annotation /// 0008415 // acyltransferase activity // inferred from electronic annotation //…	---
Fbxo21	0.00609984	10524941	1451543	Fbxo21	68.1628	32.7427	50.4528	48.8496	10.7924	1.39536	3.03387	2.21462	29.821	1.69185	BC021871	F-box protein 21	0006511 // ubiquitin-dependent protein catabolic process // inferred from electronic annotation	---	---	Apoptosis // GenMAPP /// Apoptosis_KEGG // GenMAPP
Irs2	0.000536109	10576971	1443969	Irs2	63.2929	68.0347	65.6638	16.9356	76.2073	3.73727	0.892758	2.31501	46.5715	1.40996	BE199054	insulin receptor substrate 2	0002053 // positive regulation of mesenchymal cell proliferation // inferred from genetic interaction /// 0007165 // signal transduction // inferred from electronic annotation /// 0007420 // brain development // inferred from mutant phenotype /// 0008283 // cell proliferation // inferred from mutant phenotype /// 0008286 // insulin receptor signaling pathway // inferred from mutant phenotype /// …	0005829 // cytosol // not recorded	0004871 // signal transducer activity // inferred from electronic annotation /// 0004872 // receptor activity // inferred from electronic annotation /// 0005158 // insulin receptor binding // inferred from electronic annotation /// 0005515 // protein binding // inferred from physical interaction /// 0019901 // protein kinase binding // inferred from direct assay	---
Itsn2	0.000130539	10394288	1423184	Itsn2	34.2003	106.541	70.3707	50.7279	26.4211	0.674192	4.03243	2.35331	38.5745	1.82428	AI326108	intersectin 2	0006897 // endocytosis // inferred from electronic annotation /// 0035023 // regulation of Rho protein signal transduction // inferred from electronic annotation	0005622 // intracellular // inferred from electronic annotation /// 0005737 // cytoplasm // inferred from electronic annotation	0005089 // Rho guanyl-nucleotide exchange factor activity // inferred from electronic annotation /// 0005509 // calcium ion binding // inferred from electronic annotation /// 0005515 // protein binding // inferred from electronic annotation	---
Dnajc11	0.00939007	10510604	1447055	Dnajc11	47.8982	114.941	81.4196	74.9863	27.5838	0.638759	4.16698	2.40287	51.285	1.58759	BB769600	DnaJ (Hsp40) homolog, subfamily C, member 11	---	0005743 // mitochondrial inner membrane // inferred from direct assay	0031072 // heat shock protein binding // inferred from electronic annotation	---
Nav2	0.00609984	10553354	1442467	Nav2	4.9744	47.0975	26.0359	27.8399	9.9749	0.178679	4.7216	2.45014	18.9074	1.37703	AU067780	neuron navigator 2	---	0005614 // interstitial matrix // inferred from direct assay /// 0031012 // extracellular matrix // inferred from direct assay	0008201 // heparin binding // inferred from direct assay	---
Nckap5	0.0211898	10357345	1444086	E030049G20Rik	109.984	64.2769	87.1305	31.7385	42.0752	3.46532	1.52767	2.49649	36.9069	2.36082	BB536333	RIKEN cDNA E030049G20 gene	---	---	---	---
Med13	0.00150322	10389451	1436904	Med13	21.3235	62.5915	41.9575	15.7303	16.9448	1.35557	3.69384	2.52471	16.3376	2.56816	BB667559	mediator complex subunit 13	0006350 // transcription // inferred from electronic annotation /// 0006355 // regulation of transcription, DNA-dependent // inferred from electronic annotation /// 0045944 // positive regulation of transcription from RNA polymerase II promoter // not recorded	0000119 // mediator complex // not recorded /// 0005634 // nucleus // inferred from electronic annotation	0003713 // transcription coactivator activity // not recorded	---
Rgs2	0.00389482	10358389	1447830	Rgs2	1379.28	394.293	886.785	407.781	230.957	3.38239	1.70721	2.5448	319.369	2.77668	BB034265	regulator of G-protein signaling 2	0007049 // cell cycle // inferred from electronic annotation /// 0007169 // transmembrane receptor protein tyrosine kinase signaling pathway // non-traceable author statement /// 0007186 // G-protein coupled receptor protein signaling pathway // traceable author statement /// 0007283 // spermatogenesis // inferred from reviewed computational analysis /// 0009968 // negative regulation of signal t…	0005634 // nucleus // traceable author statement	0004871 // signal transducer activity // inferred from electronic annotation /// 0005096 // GTPase activator activity // traceable author statement	Calcium_regulation_in_cardiac_cells // GenMAPP /// Smooth_muscle_contraction // GenMAPP
Triqk	0.011578	10503376	1440215	OTTMUSG00000004461	189.885	89.6526	139.769	59.6442	46.5291	3.18363	1.92681	2.55522	53.0867	2.63284	BG068916	predicted gene, OTTMUSG00000004461	0006508 // proteolysis // inferred from electronic annotation	---	0004197 // cysteine-type endopeptidase activity // inferred from electronic annotation	---
Spred2	0.00488493	10374455	1423001	Spred2	23.1236	176.431	99.7772	20.8477	39.7147	1.10917	4.44245	2.77581	30.2812	3.29502	NM_033523	sprouty-related, EVH1 domain containing 2	0000188 // inactivation of MAPK activity // inferred from mutant phenotype /// 0007275 // multicellular organismal development // inferred from electronic annotation /// 0009966 // regulation of signal transduction // inferred from electronic annotation	0005737 // cytoplasm // inferred from electronic annotation /// 0005886 // plasma membrane // inferred from direct assay /// 0016020 // membrane // inferred from electronic annotation /// 0031410 // cytoplasmic vesicle // inferred from direct assay /// 0031410 // cytoplasmic vesicle // inferred from electronic annotation	0005173 // stem cell factor receptor binding // inferred from physical interaction /// 0005515 // protein binding // inferred from physical interaction	---
Ank2	5.2e-05	10501971	1440042	Ank2	5.35795	1.6281	3.49303	0.983274	8.63437	5.44909	0.188561	2.81883	4.80882	0.726379	BB427897	ankyrin 2, brain	0006915 // apoptosis // inferred from reviewed computational analysis /// 0007165 // signal transduction // inferred from electronic annotation /// 0008104 // protein localization // inferred from mutant phenotype /// 0042981 // regulation of apoptosis // inferred from reviewed computational analysis /// 0060048 // cardiac muscle contraction // inferred from mutant phenotype	0005737 // cytoplasm // inferred from direct assay	0005515 // protein binding // inferred from physical interaction /// 0005515 // protein binding // inferred from electronic annotation	---
H2-Ob	0.00939007	10444284	1440837	H2-Ob	6.47881	168.513	87.4957	110.371	29.8616	0.0587003	5.64313	2.85091	70.1163	1.24787	BG144448	histocompatibility 2, O region beta locus	0002504 // antigen processing and presentation of peptide or polysaccharide antigen via MHC class II // inferred from electronic annotation /// 0006955 // immune response // inferred from electronic annotation /// 0019882 // antigen processing and presentation // inferred from electronic annotation	0005622 // intracellular // inferred from direct assay /// 0005764 // lysosome // not recorded /// 0005764 // lysosome // inferred from electronic annotation /// 0016020 // membrane // inferred from electronic annotation /// 0016021 // integral to membrane // inferred from electronic annotation /// 0042613 // MHC class II protein complex // inferred from electronic annotation /// 0042825 // TAP c…	0000166 // nucleotide binding // inferred from electronic annotation /// 0005524 // ATP binding // inferred from electronic annotation /// 0042277 // peptide binding // inferred from electronic annotation /// 0042288 // MHC class I protein binding // inferred from electronic annotation	---
Tmeff2	0.0142182	10346150	1441598	Tmeff2	46.5245	81.6953	64.1099	10.7785	49.312	4.3164	1.6567	2.98655	30.0453	2.13378	AV246773	transmembrane protein with EGF-like and two follistatin-like domains 2	---	0016020 // membrane // inferred from electronic annotation /// 0016021 // integral to membrane // inferred from electronic annotation	---	---
1500015O10Rik	0.0173912	10345921	1423261	1500015O10Rik	853.902	688.941	771.421	289.201	225.672	2.95263	3.05284	3.00273	257.437	2.99655	BB426248	RIKEN cDNA 1500015O10 gene	---	0005576 // extracellular region // inferred from electronic annotation	---	---
Lamc1	0.0173912	10358816	1423886	Lamc1	88.9405	31.6553	60.2979	17.6429	18.5592	5.04115	1.70564	3.3734	18.101	3.33119	BG066605	laminin, gamma 1	0006461 // protein complex assembly // inferred from electronic annotation /// 0006461 // protein complex assembly // inferred from sequence or structural similarity /// 0007155 // cell adhesion // inferred from electronic annotation /// 0007155 // cell adhesion // inferred from sequence or structural similarity /// 0016477 // cell migration // inferred from electronic annotation /// 0016477 // c…	0005576 // extracellular region // inferred from electronic annotation /// 0005578 // proteinaceous extracellular matrix // inferred from electronic annotation /// 0005604 // basement membrane // inferred from direct assay /// 0005604 // basement membrane // inferred from electronic annotation /// 0005604 // basement membrane // inferred from sequence or structural similarity /// 0005605 // basal…	0005201 // extracellular matrix structural constituent // inferred from electronic annotation /// 0005201 // extracellular matrix structural constituent // inferred from sequence or structural similarity /// 0005515 // protein binding // inferred from physical interaction /// 0005515 // protein binding // inferred from electronic annotation	Inflammatory_Response_Pathway // GenMAPP
Plxna1	0.0173912	10546184	1421232	Plxna1	6.60722	29.3832	17.9952	11.644	4.5867	0.567436	6.40618	3.48681	8.11534	2.21743	NM_008881	plexin A1	0007165 // signal transduction // inferred from electronic annotation /// 0007275 // multicellular organismal development // inferred from electronic annotation	0005622 // intracellular // inferred from electronic annotation /// 0005624 // membrane fraction // inferred from direct assay /// 0005886 // plasma membrane // inferred by curator /// 0016020 // membrane // inferred from electronic annotation /// 0016021 // integral to membrane // inferred from electronic annotation	0004872 // receptor activity // inferred from electronic annotation /// 0005515 // protein binding // inferred from physical interaction /// 0017154 // semaphorin receptor activity // inferred from physical interaction	---
Il6st	0.00609984	10407173	1421239	Il6st	50.6165	9.00512	29.8108	7.67673	22.0078	6.59349	0.409178	3.50134	14.8423	2.0085	AA717838	interleukin 6 signal transducer	0005977 // glycogen metabolic process // inferred from mutant phenotype /// 0007165 // signal transduction // inferred from direct assay /// 0008284 // positive regulation of cell proliferation // inferred from genetic interaction /// 0008593 // regulation of Notch signaling pathway // inferred from direct assay /// 0019221 // cytokine-mediated signaling pathway // inferred from direct assay	0009897 // external side of plasma membrane // inferred from direct assay /// 0016020 // membrane // inferred from electronic annotation /// 0016021 // integral to membrane // inferred from electronic annotation	0004872 // receptor activity // inferred from electronic annotation /// 0004896 // cytokine receptor activity // inferred from electronic annotation /// 0004921 // interleukin-11 receptor activity // inferred from direct assay /// 0005515 // protein binding // inferred from physical interaction /// 0005515 // protein binding // inferred from electronic annotation /// 0019970 // interleukin-11 bin…	---
Gmip	0.00192078	10572212	1428784	Gmip	33.3121	64.2904	48.8013	9.65007	17.4934	3.452	3.67513	3.56357	13.5717	3.5958	BB474868	Gem-interacting protein	0007165 // signal transduction // inferred from electronic annotation /// 0007242 // intracellular signaling cascade // inferred from electronic annotation	0005622 // intracellular // inferred from electronic annotation	0005096 // GTPase activator activity // inferred from electronic annotation /// 0005100 // Rho GTPase activator activity // inferred from electronic annotation /// 0005515 // protein binding // inferred from electronic annotation /// 0008270 // zinc ion binding // inferred from electronic annotation /// 0019992 // diacylglycerol binding // inferred from electronic annotation /// 0046872 // metal …	---
Cxcl13	0.00192078	10523359	1417851	Cxcl13	224.64	1148.77	686.704	751.288	159.933	0.299007	7.1828	3.7409	455.611	1.50722	AF030636	chemokine (C-X-C motif) ligand 13	0006935 // chemotaxis // inferred from electronic annotation /// 0006954 // inflammatory response // inferred from electronic annotation /// 0006955 // immune response // inferred from electronic annotation /// 0048535 // lymph node development // inferred from mutant phenotype	0005576 // extracellular region // inferred from electronic annotation /// 0005615 // extracellular space // inferred from electronic annotation	0005125 // cytokine activity // inferred from electronic annotation /// 0008009 // chemokine activity // inferred from electronic annotation	---
Fhl2	0.00939007	10354247	1419184	Fhl2	899.45	283.395	591.422	155.639	158.061	5.77909	1.79294	3.78601	156.85	3.77062	NM_010212	four and a half LIM domains 2	0001649 // osteoblast differentiation // inferred from expression pattern /// 0006350 // transcription // inferred from electronic annotation /// 0006355 // regulation of transcription, DNA-dependent // inferred from electronic annotation /// 0006357 // regulation of transcription from RNA polymerase II promoter // inferred from direct assay	0005634 // nucleus // inferred from direct assay /// 0005634 // nucleus // inferred from electronic annotation /// 0005737 // cytoplasm // inferred from electronic annotation	0005515 // protein binding // inferred from physical interaction /// 0008270 // zinc ion binding // inferred from electronic annotation /// 0042802 // identical protein binding // inferred from electronic annotation /// 0046872 // metal ion binding // inferred from electronic annotation	---
Ldlrad4	0.0128981	10456492	1427181	D18Ertd653e	18.9546	29.6704	24.3125	3.23935	15.0339	5.85134	1.97357	3.91245	9.13662	2.66099	BQ032363	DNA segment, Chr 18, ERATO Doi 653, expressed	---	0005886 // plasma membrane // inferred from electronic annotation /// 0016020 // membrane // inferred from electronic annotation /// 0016021 // integral to membrane // inferred from electronic annotation	---	---
Cdon	0.000907061	10584208	1421452	Cdon	38.8261	6.97956	22.9028	4.81543	51.3152	8.06285	0.136014	4.09943	28.0653	0.816055	NM_021339	cell adhesion molecule-related/down-regulated by oncogenes	0001708 // cell fate specification // inferred from genetic interaction /// 0007224 // smoothened signaling pathway // inferred from genetic interaction /// 0007224 // smoothened signaling pathway // not recorded /// 0007224 // smoothened signaling pathway // inferred from electronic annotation /// 0007520 // myoblast fusion // inferred from mutant phenotype /// 0010172 // embryonic body morphoge…	0005887 // integral to plasma membrane // not recorded /// 0009986 // cell surface // traceable author statement /// 0016020 // membrane // inferred from electronic annotation /// 0016021 // integral to membrane // inferred from electronic annotation	0005515 // protein binding // inferred from physical interaction	---
Sgol2a	0.0211898	10346365	1437370	Sgol2	187.323	87.9626	137.643	23.5947	67.0704	7.93921	1.3115	4.62535	45.3326	3.0363	AV316937	shugoshin-like 2 (S. pombe)	0007049 // cell cycle // inferred from electronic annotation /// 0007059 // chromosome segregation // inferred from electronic annotation /// 0008104 // protein localization // inferred from mutant phenotype /// 0045132 // meiotic chromosome segregation // inferred from electronic annotation /// 0051301 // cell division // inferred from electronic annotation /// 0051754 // meiotic sister chromati…	0000775 // chromosome, centromeric region // inferred from electronic annotation /// 0000780 // condensed nuclear chromosome, centromeric region // inferred from direct assay /// 0005634 // nucleus // inferred from electronic annotation /// 0030892 // mitotic cohesin complex // not recorded /// 0030892 // mitotic cohesin complex // inferred from electronic annotation	0005515 // protein binding // inferred from electronic annotation	---
Pim1	2.67e-08	10443527	1423006	Pim1	52.6056	39.0055	45.8055	7.8699	14.6346	6.6844	2.6653	4.67485	11.2522	4.07079	NM_008842	proviral integration site 1	0006468 // protein amino acid phosphorylation // inferred from direct assay /// 0006468 // protein amino acid phosphorylation // inferred from electronic annotation /// 0008283 // cell proliferation // inferred from electronic annotation /// 0008283 // cell proliferation // inferred from sequence or structural similarity /// 0043066 // negative regulation of apoptosis // inferred from electronic …	0005634 // nucleus // inferred from electronic annotation /// 0005737 // cytoplasm // inferred from electronic annotation	0000166 // nucleotide binding // inferred from electronic annotation /// 0004672 // protein kinase activity // inferred from electronic annotation /// 0004674 // protein serine/threonine kinase activity // inferred from direct assay /// 0004674 // protein serine/threonine kinase activity // inferred from electronic annotation /// 0005515 // protein binding // inferred from electronic annotation /…	---
Mcm9	9.66e-05	10369116	1455117	Mcm9	9.36895	41.1373	25.2531	61.1632	4.10422	0.15318	10.0232	5.08817	32.6337	0.773836	AV274182	minichromosome maintenance complex component 9	---	---	0000166 // nucleotide binding // inferred from electronic annotation /// 0003677 // DNA binding // inferred from electronic annotation /// 0005524 // ATP binding // inferred from electronic annotation /// 0017111 // nucleoside-triphosphatase activity // inferred from electronic annotation	---
Mchr1	0.0211898	10425507	1428031	Mchr1	44.5539	11.8652	28.2096	7.18987	2.57109	6.19677	4.61484	5.4058	4.88048	5.78008	BE647763	melanin-concentrating hormone receptor 1	0007165 // signal transduction // inferred from electronic annotation /// 0007186 // G-protein coupled receptor protein signaling pathway // inferred from electronic annotation /// 0007218 // neuropeptide signaling pathway // inferred from electronic annotation /// 0060259 // regulation of feeding behavior // traceable author statement	0005886 // plasma membrane // inferred from direct assay /// 0005886 // plasma membrane // inferred from electronic annotation /// 0016020 // membrane // inferred from electronic annotation /// 0016021 // integral to membrane // inferred from electronic annotation /// 0031513 // nonmotile primary cilium // inferred from direct assay	0004871 // signal transducer activity // inferred from electronic annotation /// 0004872 // receptor activity // inferred from electronic annotation /// 0004930 // G-protein coupled receptor activity // inferred from electronic annotation /// 0030273 // melanin-concentrating hormone receptor activity // inferred from electronic annotation	---
Trio	0.0142182	10427928	1438099	Trio	38.7068	29.8427	34.2747	3.98059	16.0233	9.72388	1.86246	5.79317	10.0019	3.42681	BB322971	triple functional domain (PTPRF interacting)	0006468 // protein amino acid phosphorylation // inferred from electronic annotation /// 0007242 // intracellular signaling cascade // inferred from electronic annotation /// 0035023 // regulation of Rho protein signal transduction // inferred from electronic annotation	0005622 // intracellular // inferred from electronic annotation /// 0005737 // cytoplasm // inferred from electronic annotation	0000166 // nucleotide binding // inferred from electronic annotation /// 0004672 // protein kinase activity // inferred from electronic annotation /// 0004674 // protein serine/threonine kinase activity // inferred from electronic annotation /// 0005085 // guanyl-nucleotide exchange factor activity // inferred from electronic annotation /// 0005089 // Rho guanyl-nucleotide exchange factor activit…	---
Tspan32	0.00848713	10559248	1418398	Tspan32	5.31992	75.3071	40.3135	83.1199	6.05805	0.064003	12.4309	6.24746	44.589	0.904114	AF175771	tetraspanin 32	---	0005622 // intracellular // inferred from direct assay /// 0016020 // membrane // inferred from electronic annotation /// 0016021 // integral to membrane // inferred from electronic annotation /// 0016021 // integral to membrane // non-traceable author statement	---	---
Zfp697	0.0211898	10494655	1429101	Gja5	37.1542	3.93234	20.5433	2.73488	61.5411	13.5853	0.0638978	6.8246	32.138	0.63922	AK017840	gap junction membrane channel protein alpha 5	0001501 // skeletal system development // inferred from mutant phenotype /// 0001568 // blood vessel development // inferred from mutant phenotype /// 0007154 // cell communication // inferred from electronic annotation /// 0030326 // embryonic limb morphogenesis // inferred from mutant phenotype /// 0035050 // embryonic heart tube development // inferred from mutant phenotype	0005886 // plasma membrane // inferred from electronic annotation /// 0005921 // gap junction // inferred from electronic annotation /// 0005922 // connexon complex // inferred from electronic annotation /// 0016020 // membrane // inferred from electronic annotation /// 0016021 // integral to membrane // inferred from electronic annotation /// 0030054 // cell junction // inferred from electronic …	---	Calcium_regulation_in_cardiac_cells // GenMAPP
Gsap	0.002767	10519951	1435596	Pion	66.0651	99.7795	82.9223	47.2224	7.61493	1.39902	13.1031	7.25108	27.4187	3.0243	BB820613	pigeon homolog (Drosophila)	0006508 // proteolysis // inferred from electronic annotation	---	0004197 // cysteine-type endopeptidase activity // inferred from electronic annotation	---
Mprip	0.0257197	10376534	1456675	Mprip	23.2124	8.74766	15.98	1.95393	2.36815	11.8799	3.69389	7.78687	2.16104	7.39461	BB279458	myosin phosphatase Rho interacting protein	---	0005737 // cytoplasm // inferred from electronic annotation /// 0005856 // cytoskeleton // inferred from electronic annotation	0003779 // actin binding // inferred from electronic annotation	---
Nup205	0.0211898	10537246	1430343	Nup205	3.67033	66.1484	34.9094	27.2985	2.40952	0.134452	27.4529	13.7937	14.854	2.35016	AK014419	nucleoporin 205	---	0016020 // membrane // inferred from electronic annotation	0005515 // protein binding // inferred from electronic annotation	---
Tkt	0.00609984	10413542	1436605	Tkt	70.4629	56.8797	63.6713	2.36036	27.6659	29.8526	2.05595	15.9543	15.0132	4.24103	BB022982	transketolase	0008152 // metabolic process // inferred from electronic annotation /// 0040008 // regulation of growth // inferred from mutant phenotype	---	0003824 // catalytic activity // inferred from electronic annotation /// 0004802 // transketolase activity // inferred from direct assay /// 0004802 // transketolase activity // inferred from electronic annotation /// 0005509 // calcium ion binding // inferred from electronic annotation /// 0005515 // protein binding // inferred from electronic annotation /// 0016740 // transferase activity // in…	Pentose_Phosphate_Pathway // GenMAPP
Traf3ip3	0.0257197	10361215	1434573	Traf3ip3	42.9005	85.8685	64.3845	56.8699	2.42646	0.754363	35.3884	18.0714	29.6482	2.17162	BE986588	TRAF3 interacting protein 3	0006508 // proteolysis // inferred from electronic annotation	0016020 // membrane // inferred from electronic annotation /// 0016021 // integral to membrane // inferred from electronic annotation	0003824 // catalytic activity // inferred from electronic annotation /// 0004252 // serine-type endopeptidase activity // inferred from electronic annotation	---

## Sheet: Down 50%
gene	Circadian	ID	Probe Set ID	Gene Symbol	CE26-30_092309.mas5-Signal	CE38-42_092309.mas5-Signal	CE average	CE amp/CE wt	WT26-30_092309.mas5-Signal	WT38-42_092309.mas5-Signal	CE/WT 26	CE/WT 38	WT average	Fold Change CE?WT	CoreEnhance/Wildtype	Representative Public ID	Gene Title	Gene Ontology Biological Process	Gene Ontology Cellular Component	Gene Ontology Molecular Function	Pathway
Rhobtb3	0.00117065	10410695	1453227	Rhobtb3	5.77555	19.0859	12.4307	0.186283	123.811	195.263	0.0466482	0.0977445	159.537	0.0721964	0.0779175	BG801497	Rho-related BTB domain containing 3	---	---	0005515 // protein binding // inferred from electronic annotation	---
Ppp1r3c	1.49e-06	10467206	1425631	Ppp1r3c	117.257	1101.4	609.329	0.145397	2098.25	8866.92	0.0558832	0.124215	5482.58	0.0900489	0.111139	U89924	protein phosphatase 1, regulatory (inhibitor) subunit 3C	0005975 // carbohydrate metabolic process // inferred from electronic annotation /// 0005977 // glycogen metabolic process // inferred from direct assay /// 0005977 // glycogen metabolic process // inferred from electronic annotation /// 0005978 // glycogen biosynthetic process // inferred from mutant phenotype /// 0006605 // protein targeting // traceable author statement	---	0005515 // protein binding // traceable author statement	Circadian_Exercise // GenMAPP
Met	0.00758419	10536505	1422990	Met	4.68504	38.596	21.6405	0.152608	56.0791	278.289	0.0835433	0.138691	167.184	0.111117	0.129441	NM_008591	met proto-oncogene	0000187 // activation of MAPK activity // inferred from physical interaction /// 0001764 // neuron migration // inferred from electronic annotation /// 0006468 // protein amino acid phosphorylation // inferred from electronic annotation /// 0007275 // multicellular organismal development // inferred from electronic annotation /// 0007420 // brain development // inferred from mutant phenotype /// …	0005624 // membrane fraction // inferred from direct assay /// 0009925 // basal plasma membrane // not recorded /// 0016020 // membrane // inferred from electronic annotation /// 0016021 // integral to membrane // inferred from electronic annotation /// 0019861 // flagellum // inferred from electronic annotation	0000166 // nucleotide binding // inferred from electronic annotation /// 0004672 // protein kinase activity // inferred from electronic annotation /// 0004713 // protein tyrosine kinase activity // inferred from electronic annotation /// 0004714 // transmembrane receptor protein tyrosine kinase activity // inferred from electronic annotation /// 0004872 // receptor activity // inferred from elect…	---
Map3k4	0.0142182	10447742	1450253	Map3k4	4.41708	43.3602	23.8886	0.252949	71.0473	225.004	0.062171	0.192709	148.026	0.12744	0.161382	U11548	mitogen-activated protein kinase kinase kinase 4	0006468 // protein amino acid phosphorylation // inferred from electronic annotation	0005737 // cytoplasm // inferred from electronic annotation	0000166 // nucleotide binding // inferred from electronic annotation /// 0000287 // magnesium ion binding // inferred from electronic annotation /// 0004672 // protein kinase activity // inferred from electronic annotation /// 0004674 // protein serine/threonine kinase activity // inferred from electronic annotation /// 0004709 // MAP kinase kinase kinase activity // inferred from electronic anno…	G13_Signaling_Pathway // GenMAPP
Tbc1d1	0.000536109	10522024	1419446	Tbc1d1	10.8957	19.9941	15.4449	0.235083	75.9919	114.695	0.14338	0.174324	95.3433	0.158852	0.161992	BB501891	TBC1 domain family, member 1	0032313 // regulation of Rab GTPase activity // inferred from electronic annotation	0005622 // intracellular // inferred from electronic annotation /// 0005634 // nucleus // inferred from electronic annotation	0005096 // GTPase activator activity // inferred from electronic annotation /// 0005097 // Rab GTPase activator activity // inferred from electronic annotation	---
Slc8a1	9.96e-07	10453233	1425817	Slc8a1	4.45933	9.80014	7.12973	0.167936	27.0835	58.8861	0.164651	0.166425	42.9848	0.165538	0.165866	U70033	solute carrier family 8 (sodium/calcium exchanger), member 1	0002026 // regulation of the force of heart contraction // inferred from mutant phenotype /// 0002028 // regulation of sodium ion transport // inferred from electronic annotation /// 0006810 // transport // inferred from electronic annotation /// 0006811 // ion transport // inferred from electronic annotation /// 0006814 // sodium ion transport // inferred from direct assay /// 0006814 // sodium …	0005886 // plasma membrane // inferred from direct assay /// 0005886 // plasma membrane // inferred from electronic annotation /// 0016020 // membrane // inferred from electronic annotation /// 0016021 // integral to membrane // traceable author statement /// 0016021 // integral to membrane // inferred from electronic annotation /// 0030315 // T-tubule // inferred from direct assay /// 0042383 //…	0005432 // calcium:sodium antiporter activity // inferred from direct assay /// 0005432 // calcium:sodium antiporter activity // inferred from electronic annotation /// 0005509 // calcium ion binding // inferred from electronic annotation /// 0005515 // protein binding // inferred from physical interaction /// 0005516 // calmodulin binding // inferred from electronic annotation /// 0015297 // ant…	Calcium_regulation_in_cardiac_cells // GenMAPP /// Smooth_muscle_contraction // GenMAPP
Pde2a	0.00150322	10555510	1452202	Pde2a	21.6147	30.2269	25.9208	0.0708599	101.435	222.973	0.213089	0.135563	162.204	0.174326	0.159804	BG069616	phosphodiesterase 2A, cGMP-stimulated	0007165 // signal transduction // inferred from electronic annotation	0016020 // membrane // inferred from electronic annotation	0003824 // catalytic activity // inferred from electronic annotation /// 0004114 // 3',5'-cyclic-nucleotide phosphodiesterase activity // inferred from electronic annotation /// 0016787 // hydrolase activity // inferred from electronic annotation	---
Tmcc3	0.0142182	10365891	1451794	Tmcc3	33.431	64.8954	49.1632	0.081523	134.079	520.037	0.249338	0.12479	327.058	0.187064	0.15032	BC026867	transmembrane and coiled coil domains 3	---	0016020 // membrane // inferred from electronic annotation /// 0016021 // integral to membrane // inferred from electronic annotation	---	---
Atg13	0.0142182	10485048	1423793	D2Ertd391e	21.5534	112.281	66.9171	0.771395	259.236	376.851	0.0831419	0.297945	318.044	0.190543	0.210402	BM231455	DNA segment, Chr 2, ERATO Doi 391, expressed	---	---	---	---
Itga4	0.000536109	10473125	1421194	Cerkl /// Itga4	9.18251	29.0873	19.1349	0.410086	68.4247	116.963	0.134199	0.248688	92.6937	0.191444	0.206431	NM_010576	ceramide kinase-like /// integrin alpha 4	0001974 // blood vessel remodeling // inferred from mutant phenotype /// 0007155 // cell adhesion // inferred from mutant phenotype /// 0007155 // cell adhesion // inferred from electronic annotation /// 0007157 // heterophilic cell adhesion // inferred from mutant phenotype /// 0007159 // leukocyte adhesion // inferred from mutant phenotype /// 0007159 // leukocyte adhesion // inferred from elec…	0008305 // integrin complex // inferred from electronic annotation /// 0009897 // external side of plasma membrane // inferred from direct assay /// 0009986 // cell surface // inferred from electronic annotation /// 0016020 // membrane // inferred from electronic annotation /// 0016021 // integral to membrane // inferred from electronic annotation	0001968 // fibronectin binding // inferred from mutant phenotype /// 0004872 // receptor activity // inferred from electronic annotation /// 0005509 // calcium ion binding // inferred from electronic annotation /// 0005515 // protein binding // inferred from electronic annotation /// 0016301 // kinase activity // inferred from electronic annotation /// 0042802 // identical protein binding // infe…	Integrin-mediated_cell_adhesion_KEGG // GenMAPP
Golph3l	0.0257197	10494288	1451619	Golph3l	12.9595	86.2786	49.619	0.712494	143.128	246.033	0.0905444	0.350679	194.581	0.220612	0.255005	BC027194	golgi phosphoprotein 3-like	---	0005737 // cytoplasm // inferred from electronic annotation /// 0005794 // Golgi apparatus // not recorded /// 0005794 // Golgi apparatus // inferred from electronic annotation /// 0016020 // membrane // inferred from electronic annotation	---	---
Tnfrsf21	0.00609984	10445241	1422740	Tnfrsf21	35.2472	139.181	87.2139	1.2358	306.98	391.082	0.114819	0.355886	349.031	0.235353	0.249874	BG972377	tumor necrosis factor receptor superfamily, member 21	0006915 // apoptosis // inferred from electronic annotation /// 0007165 // signal transduction // inferred from electronic annotation	0016020 // membrane // inferred from electronic annotation /// 0016021 // integral to membrane // inferred from electronic annotation	0004872 // receptor activity // inferred from electronic annotation /// 0005515 // protein binding // inferred from electronic annotation	Apoptosis // GenMAPP
Dgkh	0.00939007	10421774	1457213	Dgkh	15.1371	21.2263	18.1817	0.702748	70.6191	79.284	0.214349	0.267726	74.9515	0.241037	0.24258	AV276089	diacylglycerol kinase, eta	0007205 // activation of protein kinase C activity // inferred from electronic annotation /// 0007242 // intracellular signaling cascade // inferred from electronic annotation /// 0046339 // diacylglycerol metabolic process // not recorded	0005737 // cytoplasm // not recorded /// 0005768 // endosome // not recorded	0004143 // diacylglycerol kinase activity // not recorded /// 0004143 // diacylglycerol kinase activity // inferred from electronic annotation /// 0042803 // protein homodimerization activity // not recorded	---
Tgfb3	0.011578	10401673	1417455	Tgfb3	87.8567	99.0754	93.4661	0.0255369	254.533	693.849	0.345168	0.142791	474.191	0.243979	0.197106	BC014690	transforming growth factor, beta 3	0000187 // activation of MAPK activity // inferred from electronic annotation /// 0001666 // response to hypoxia // inferred from electronic annotation /// 0001701 // in utero embryonic development // inferred from mutant phenotype /// 0006917 // induction of apoptosis // inferred from mutant phenotype /// 0007184 // SMAD protein nuclear translocation // inferred from electronic annotation /// 00…	0005576 // extracellular region // inferred from electronic annotation /// 0005615 // extracellular space // inferred from electronic annotation /// 0005634 // nucleus // inferred from electronic annotation /// 0005737 // cytoplasm // inferred from electronic annotation /// 0030141 // secretory granule // inferred from electronic annotation /// 0030315 // T-tubule // inferred from electronic anno…	0005160 // transforming growth factor beta receptor binding // inferred from electronic annotation /// 0005515 // protein binding // inferred from electronic annotation /// 0008083 // growth factor activity // inferred from electronic annotation	---
Usp22	0.0257197	10386636	1456043	Usp22	3.85051	2.7393	3.29491	0.0843403	10	23.1753	0.385051	0.118199	16.5876	0.251625	0.198636	BE951601	ubiquitin specific peptidase 22	0006511 // ubiquitin-dependent protein catabolic process // inferred by curator /// 0006511 // ubiquitin-dependent protein catabolic process // inferred from electronic annotation /// 0016578 // histone deubiquitination // inferred from electronic annotation /// 0016579 // protein deubiquitination // inferred from direct assay /// 0045931 // positive regulation of mitotic cell cycle // inferred f…	0000124 // SAGA complex // inferred from electronic annotation /// 0005634 // nucleus // inferred from electronic annotation	0004221 // ubiquitin thiolesterase activity // inferred from electronic annotation /// 0004843 // ubiquitin-specific protease activity // inferred from direct assay /// 0008233 // peptidase activity // inferred from electronic annotation /// 0008234 // cysteine-type peptidase activity // inferred from electronic annotation /// 0008270 // zinc ion binding // inferred from electronic annotation ///…	---
Klhl8	0.00023376	10531899	1433526	Klhl8	93.0831	100.214	96.6483	0.0263831	267.808	538.077	0.347574	0.186244	402.943	0.266909	0.239856	BM942651	kelch-like 8 (Drosophila)	---	---	0005515 // protein binding // inferred from electronic annotation	---
Atoh8	0.00609984	10545372	1426418	Atoh8	5.94177	21.501	13.7214	0.118684	15.1524	146.25	0.392134	0.147015	80.7014	0.269574	0.170026	AK016909	atonal homolog 8 (Drosophila)	0006350 // transcription // inferred from electronic annotation /// 0006355 // regulation of transcription, DNA-dependent // inferred from electronic annotation /// 0007275 // multicellular organismal development // inferred from electronic annotation /// 0007399 // nervous system development // inferred from electronic annotation /// 0030154 // cell differentiation // inferred from electronic an…	0005634 // nucleus // inferred from electronic annotation	0003677 // DNA binding // inferred from electronic annotation /// 0030528 // transcription regulator activity // inferred from electronic annotation	---
Vegfa	0.00309146	10451198	1451959	Vegfa	29.7782	28.8962	29.3372	0.0119266	83.1419	157.096	0.358161	0.18394	120.119	0.27105	0.244235	U50279	vascular endothelial growth factor A	0001525 // angiogenesis // inferred from direct assay /// 0001525 // angiogenesis // inferred from genetic interaction /// 0001525 // angiogenesis // inferred from mutant phenotype /// 0001525 // angiogenesis // inferred from electronic annotation /// 0001541 // ovarian follicle development // inferred from mutant phenotype /// 0001568 // blood vessel development // inferred from mutant phenotype…	0005576 // extracellular region // inferred from electronic annotation /// 0005615 // extracellular space // inferred from direct assay /// 0005737 // cytoplasm // inferred from direct assay /// 0005886 // plasma membrane // inferred from electronic annotation /// 0016020 // membrane // inferred from electronic annotation	0005515 // protein binding // inferred from physical interaction /// 0008083 // growth factor activity // inferred from electronic annotation /// 0008201 // heparin binding // inferred from electronic annotation	---
Asb2	1.6e-08	10402325	1428444	Asb2	1740.85	5766.98	3753.91	1.83043	11403.6	13603.1	0.152658	0.423944	12503.4	0.288301	0.300232	AK003566	ankyrin repeat and SOCS box-containing 2	0006511 // ubiquitin-dependent protein catabolic process // inferred from electronic annotation /// 0007242 // intracellular signaling cascade // inferred from electronic annotation	---	---	---
Wdr53	0.0173912	10435015	1428839	Wdr53	57.7403	93.466	75.6032	0.855329	233.971	275.739	0.246784	0.338966	254.855	0.292875	0.296652	AK005105	WD repeat domain 53	---	---	---	---
Arhgef1	0.00192078	10551030	1421164	Arhgef1	64.3071	68.7694	66.5383	0.0528254	275.297	190.825	0.233592	0.36038	233.061	0.296986	0.285497	NM_008488	Rho guanine nucleotide exchange factor (GEF) 1	0007242 // intracellular signaling cascade // inferred from electronic annotation /// 0035023 // regulation of Rho protein signal transduction // inferred from electronic annotation	0005622 // intracellular // inferred from electronic annotation /// 0005737 // cytoplasm // inferred from electronic annotation /// 0016020 // membrane // inferred from electronic annotation	0005085 // guanyl-nucleotide exchange factor activity // inferred from electronic annotation /// 0005089 // Rho guanyl-nucleotide exchange factor activity // inferred from electronic annotation /// 0005096 // GTPase activator activity // inferred from electronic annotation /// 0005515 // protein binding // inferred from physical interaction	G13_Signaling_Pathway // GenMAPP /// G_Protein_Signaling // GenMAPP
Rnpep	0.0173912	10358038	1451243	Rnpep	19.0773	112.254	65.6659	1.34613	155.949	225.167	0.122331	0.498539	190.558	0.310435	0.344598	BC019200	arginyl aminopeptidase (aminopeptidase B)	0006508 // proteolysis // inferred from electronic annotation /// 0019370 // leukotriene biosynthetic process // inferred from electronic annotation	0005576 // extracellular region // inferred from electronic annotation /// 0005576 // extracellular region // inferred from sequence or structural similarity /// 0005615 // extracellular space // inferred from electronic annotation /// 0005886 // plasma membrane // inferred from sequence or structural similarity	0004177 // aminopeptidase activity // inferred from electronic annotation /// 0004177 // aminopeptidase activity // inferred from sequence or structural similarity /// 0005488 // binding // inferred from electronic annotation /// 0008233 // peptidase activity // inferred from electronic annotation /// 0008237 // metallopeptidase activity // inferred from electronic annotation /// 0008270 // zinc …	mRNA_processing_binding_Reactome // GenMAPP
Pecam1	0.000130539	10392221	1421287	Pecam1	156.178	449.739	302.958	0.831713	740.466	1093.42	0.210918	0.411312	916.945	0.311115	0.330399	NM_008816	platelet/endothelial cell adhesion molecule 1	0007155 // cell adhesion // inferred from electronic annotation /// 0007266 // Rho protein signal transduction // inferred from mutant phenotype /// 0030334 // regulation of cell migration // inferred from mutant phenotype /// 0042060 // wound healing // inferred from mutant phenotype	0005886 // plasma membrane // inferred from direct assay /// 0016020 // membrane // inferred from electronic annotation /// 0016021 // integral to membrane // inferred from electronic annotation /// 0045121 // membrane raft // inferred from direct assay	0005515 // protein binding // inferred from electronic annotation	---
Mob1a	0.00244254	10539421	1424483	Mobkl1b	187.189	297.294	242.241	0.609975	666.27	846.777	0.28095	0.351088	756.523	0.316019	0.320203	AV226922	MOB1, Mps One Binder kinase activator-like 1B (yeast)	---	---	0005515 // protein binding // inferred from electronic annotation /// 0008270 // zinc ion binding // inferred from electronic annotation /// 0046872 // metal ion binding // inferred from electronic annotation	---
Cmip	0.00389482	10575777	1427980	4933407C03Rik	75.2848	23.9472	49.616	0.69074	176.951	102.629	0.425456	0.233339	139.79	0.329397	0.354933	BB324697	RIKEN cDNA 4933407C03 gene	---	0005634 // nucleus // inferred from electronic annotation /// 0005737 // cytoplasm // inferred from electronic annotation	---	---
Arsb	0.00192078	10406663	1429190	Arsb	9.79215	2.16352	5.97784	1.42042	19.2538	13.8831	0.508584	0.155839	16.5684	0.332211	0.360797	BI440651	arylsulfatase B	0008152 // metabolic process // inferred from electronic annotation	0005764 // lysosome // inferred from electronic annotation	0003824 // catalytic activity // inferred from electronic annotation /// 0003943 // N-acetylgalactosamine-4-sulfatase activity // inferred from electronic annotation /// 0004065 // arylsulfatase activity // inferred from direct assay /// 0005509 // calcium ion binding // inferred from electronic annotation /// 0008484 // sulfuric ester hydrolase activity // inferred from electronic annotation ///…	---
Col4a2	7.11e-05	10570068	1424051	Col4a2	811.042	512.188	661.615	2.06084	2040.34	1895.32	0.397504	0.270238	1967.83	0.333871	0.336215	BC013560	collagen, type IV, alpha 2	0016525 // negative regulation of angiogenesis // inferred from sequence or structural similarity	0005576 // extracellular region // inferred from electronic annotation /// 0005578 // proteinaceous extracellular matrix // inferred from electronic annotation /// 0005581 // collagen // inferred from electronic annotation /// 0005587 // collagen type IV // inferred from direct assay /// 0005604 // basement membrane // inferred from direct assay /// 0005604 // basement membrane // inferred from e…	0005201 // extracellular matrix structural constituent // inferred from electronic annotation /// 0005488 // binding // inferred from electronic annotation	---
Pdxk	0.00040883	10370497	1427930	Pdxk	3.83139	41.3548	22.5931	0.567952	18.8851	84.9529	0.202879	0.486796	51.919	0.344838	0.43516	BG063905	pyridoxal (pyridoxine, vitamin B6) kinase	0008615 // pyridoxine biosynthetic process // inferred from electronic annotation	0005737 // cytoplasm // inferred from electronic annotation	0000166 // nucleotide binding // inferred from electronic annotation /// 0005524 // ATP binding // inferred from electronic annotation /// 0008270 // zinc ion binding // inferred from electronic annotation /// 0008478 // pyridoxal kinase activity // inferred from electronic annotation /// 0016301 // kinase activity // inferred from electronic annotation /// 0016740 // transferase activity // infe…	---
Gprc5c	0.00848713	10382435	1424450	Gprc5c	22.2243	217.367	119.796	1.32791	213.698	360.653	0.103998	0.602703	287.176	0.353351	0.417151	BC008228	G protein-coupled receptor, family C, group 5, member C	0007165 // signal transduction // inferred from electronic annotation /// 0007186 // G-protein coupled receptor protein signaling pathway // inferred from electronic annotation /// 0007601 // visual perception // inferred from electronic annotation	0005739 // mitochondrion // inferred from direct assay /// 0005886 // plasma membrane // inferred from electronic annotation /// 0016020 // membrane // inferred from electronic annotation /// 0016021 // integral to membrane // inferred from electronic annotation	0004871 // signal transducer activity // inferred from electronic annotation /// 0004872 // receptor activity // inferred from electronic annotation /// 0004930 // G-protein coupled receptor activity // inferred from electronic annotation /// 0005118 // sevenless binding // inferred from electronic annotation /// 0005515 // protein binding // inferred from electronic annotation	---
Adamts10	0.00192078	10443949	1427139	Adamts10	69.7846	13.2787	41.5316	2.02366	113.543	141.465	0.61461	0.0938649	127.504	0.354238	0.325728	BG064835	a disintegrin-like and metallopeptidase (reprolysin type) with thrombospondin type 1 motif, 10	0006508 // proteolysis // inferred from electronic annotation	0005576 // extracellular region // inferred from electronic annotation /// 0005578 // proteinaceous extracellular matrix // inferred from electronic annotation /// 0031012 // extracellular matrix // inferred from electronic annotation	0004222 // metalloendopeptidase activity // inferred from electronic annotation /// 0008233 // peptidase activity // inferred from electronic annotation /// 0008237 // metallopeptidase activity // inferred from electronic annotation /// 0008270 // zinc ion binding // inferred from electronic annotation /// 0016787 // hydrolase activity // inferred from electronic annotation /// 0046872 // metal i…	---
Akap8l	0.0211898	10449854	1417734	Akap8l	123.932	183.108	153.52	0.4078	353.661	498.772	0.350426	0.367118	426.216	0.358772	0.360193	NM_017476	A kinase (PRKA) anchor protein 8-like	---	0005622 // intracellular // inferred from electronic annotation /// 0005634 // nucleus // inferred from electronic annotation /// 0005694 // chromosome // inferred from electronic annotation /// 0005737 // cytoplasm // inferred from electronic annotation /// 0016363 // nuclear matrix // inferred from electronic annotation	0003677 // DNA binding // inferred from electronic annotation /// 0005515 // protein binding // inferred from electronic annotation /// 0008270 // zinc ion binding // inferred from electronic annotation /// 0016301 // kinase activity // inferred from electronic annotation /// 0046872 // metal ion binding // inferred from electronic annotation	---
Pnkd	0.00609984	10347310	1418746	Pnkd	49.4147	72.4921	60.9534	0.292477	131.399	210.302	0.376066	0.344704	170.851	0.360385	0.356764	NM_019999	paroxysmal nonkinesiogenic dyskinesia	---	0005634 // nucleus // inferred from electronic annotation /// 0005737 // cytoplasm // inferred from electronic annotation /// 0005739 // mitochondrion // inferred from electronic annotation /// 0016020 // membrane // inferred from electronic annotation	0008270 // zinc ion binding // inferred from electronic annotation /// 0016787 // hydrolase activity // inferred from electronic annotation /// 0046872 // metal ion binding // inferred from electronic annotation	---
Dhx8	0.0211898	10381477	1426629	Dhx8	104.565	183.669	144.117	0.418434	301.568	490.615	0.346738	0.374364	396.092	0.360551	0.363847	BB667274	DEAH (Asp-Glu-Ala-His) box polypeptide 8	0006397 // mRNA processing // inferred from electronic annotation /// 0008380 // RNA splicing // inferred from electronic annotation	0005634 // nucleus // inferred from electronic annotation /// 0005681 // spliceosome // inferred from electronic annotation	0000166 // nucleotide binding // inferred from electronic annotation /// 0003676 // nucleic acid binding // inferred from electronic annotation /// 0003723 // RNA binding // inferred from electronic annotation /// 0004386 // helicase activity // inferred from electronic annotation /// 0005524 // ATP binding // inferred from electronic annotation /// 0008026 // ATP-dependent helicase activity // i…	mRNA_processing_binding_Reactome // GenMAPP
Rexo4	0.000699194	10481155	1434114	Rexo4	48.9632	88.4452	68.7042	0.271684	123.33	268.654	0.397009	0.329217	195.992	0.363113	0.350546	BG076284	REX4, RNA exonuclease 4 homolog (S. cerevisiae)	---	0005622 // intracellular // inferred from electronic annotation /// 0005634 // nucleus // inferred from electronic annotation	0003676 // nucleic acid binding // inferred from electronic annotation /// 0004518 // nuclease activity // inferred from electronic annotation /// 0004527 // exonuclease activity // inferred from electronic annotation /// 0016787 // hydrolase activity // inferred from electronic annotation	---
Lpcat3	0.0257197	10541695	1423960	Lpcat3	226.753	385.02	305.887	0.542329	676.933	968.761	0.334971	0.397435	822.847	0.366203	0.371742	BC006753	lysophosphatidylcholine acyltransferase 3	0008654 // phospholipid biosynthetic process // inferred from electronic annotation	0005783 // endoplasmic reticulum // inferred from electronic annotation /// 0005789 // endoplasmic reticulum membrane // inferred from electronic annotation /// 0016020 // membrane // inferred from electronic annotation /// 0016021 // integral to membrane // inferred from electronic annotation	0008415 // acyltransferase activity // inferred from electronic annotation /// 0016740 // transferase activity // inferred from electronic annotation /// 0047184 // 1-acylglycerophosphocholine O-acyltransferase activity // inferred from electronic annotation	---
Ccdc57	0.00150322	10394018	1429852	Ccdc57	39.5344	8.04952	23.7919	2.11683	67.3049	52.4313	0.587392	0.153525	59.8681	0.370458	0.397406	AK017054	coiled-coil domain containing 57	---	---	---	---
Plxnd1	0.011578	10547100	1451475	Plxnd1	248.494	245.179	246.837	0.14621	660.575	637.9	0.376179	0.384353	649.238	0.380266	0.380194	BC019530	plexin D1	0001569 // patterning of blood vessels // inferred from mutant phenotype /// 0007165 // signal transduction // inferred from electronic annotation /// 0007275 // multicellular organismal development // inferred from electronic annotation	0005622 // intracellular // inferred from electronic annotation /// 0005886 // plasma membrane // inferred by curator /// 0016020 // membrane // inferred from electronic annotation /// 0016021 // integral to membrane // inferred from electronic annotation	0004872 // receptor activity // inferred from electronic annotation /// 0005515 // protein binding // inferred from physical interaction /// 0017154 // semaphorin receptor activity // inferred from physical interaction	---
Mlycd	0.00389482	10575867	1449964	Mlycd	350.304	731.031	540.668	0.851994	1146.87	1593.73	0.305445	0.458692	1370.3	0.382068	0.394562	NM_019966	malonyl-CoA decarboxylase	0006085 // acetyl-CoA biosynthetic process // inferred from electronic annotation /// 0006633 // fatty acid biosynthetic process // inferred from electronic annotation /// 0008610 // lipid biosynthetic process // inferred from electronic annotation /// 0031998 // regulation of fatty acid beta-oxidation // inferred from electronic annotation	0005737 // cytoplasm // inferred from electronic annotation /// 0005739 // mitochondrion // inferred from direct assay /// 0005739 // mitochondrion // inferred from electronic annotation /// 0005777 // peroxisome // inferred from electronic annotation /// 0005829 // cytosol // inferred from electronic annotation	0016829 // lyase activity // inferred from electronic annotation /// 0016831 // carboxy-lyase activity // inferred from electronic annotation /// 0050080 // malonyl-CoA decarboxylase activity // inferred from electronic annotation	---
Gab1	0.00389482	10579925	1448814	Gab1	82.2112	160.45	121.331	0.588397	243.159	376.13	0.338096	0.426583	309.644	0.382339	0.391839	NM_021356	growth factor receptor bound protein 2-associated protein 1	0000187 // activation of MAPK activity // inferred from direct assay /// 0006979 // response to oxidative stress // inferred from direct assay /// 0007165 // signal transduction // inferred from direct assay /// 0007257 // activation of JNK activity // inferred from mutant phenotype /// 0030334 // regulation of cell migration // inferred from genetic interaction	0005737 // cytoplasm // inferred from direct assay	0004871 // signal transducer activity // inferred from direct assay /// 0004872 // receptor activity // inferred from electronic annotation /// 0005515 // protein binding // inferred from physical interaction	---
Tef	9.96e-07	10425601	1424175	Tef	1097.06	2644.57	1870.81	0.689708	3467.51	5711.23	0.316382	0.463047	4589.37	0.389715	0.407641	BC017689	thyrotroph embryonic factor	0006350 // transcription // inferred from electronic annotation /// 0006355 // regulation of transcription, DNA-dependent // inferred from electronic annotation /// 0045944 // positive regulation of transcription from RNA polymerase II promoter // inferred from direct assay /// 0048511 // rhythmic process // inferred from electronic annotation	0005634 // nucleus // inferred by curator /// 0005634 // nucleus // inferred from electronic annotation	0003677 // DNA binding // inferred from electronic annotation /// 0003690 // double-stranded DNA binding // inferred from direct assay /// 0003700 // transcription factor activity // inferred from electronic annotation /// 0005515 // protein binding // inferred from physical interaction /// 0016563 // transcription activator activity // inferred from direct assay /// 0043565 // sequence-specific …	---
Rnf122	9.66e-05	10571214	1454857	Rnf122	20.3782	22.1329	21.2555	0.0223378	34.698	113.253	0.587301	0.195428	73.9756	0.391365	0.287332	AW551457	ring finger protein 122	---	0005783 // endoplasmic reticulum // inferred from electronic annotation /// 0005794 // Golgi apparatus // inferred from electronic annotation /// 0016020 // membrane // inferred from electronic annotation /// 0016021 // integral to membrane // inferred from electronic annotation	0005515 // protein binding // inferred from electronic annotation /// 0008270 // zinc ion binding // inferred from electronic annotation /// 0046872 // metal ion binding // inferred from electronic annotation	---
[truncated: 21 more rows]
