# Supplementary material for: MYOD1 functions as a clock amplifier as well as a critical co-factor for downstream circadian gene expression in muscle
Source: eLife. 2019 Feb 21;8:e43017. doi: 10.7554/eLife.43017 (PMC6398978; doi:10.7554/eLife.43017)
Supplement: Supplementary file 6. [file elife-43017-supp6.xlsx]

## Sheet: Sheet1
Supplementary file 6. Primer sequences used in RT-PCR of adult skeletal muscle.
Gene	Forward Primer Sequence 5'->3'			Reverse Primer Sequence 5'->3'
Asb2	CAACGTGCCATCGGACATGA			GCATGACCCCTTGGAACAGA
Nrip1	AGACCAGAACTTTAACCTCTCGG			CGATGGAATCAGACAGCCTCT
Ppp1r3c	TGATCCATGTGCTAGATCCACG			CAGAGGTGGTGAATGAGCCAA
Vegfa	CTGCCGTCCGATTGAGACC			CCCCTCCTTGTACCACTGTC
Tcap	GATGCGCCTGGGTATCCTC			GATCGAGACAGGGTACGG
Rpl26	CGAGTCCAGCGAGAGAAGG			CAGAGGTGGTGAATGAGCCAA
