# Supplementary material for: MYOD1 functions as a clock amplifier as well as a critical co-factor for downstream circadian gene expression in muscle
Source: eLife. 2019 Feb 21;8:e43017. doi: 10.7554/eLife.43017 (PMC6398978; doi:10.7554/eLife.43017)
Supplement: Supplementary file 7. [file elife-43017-supp7.xlsx]

## Sheet: Sheet1
Supplementary file 7. Primer sequences used in ChIP-PCR.
Gene	Forward Primer Sequence 5'->3'			Reverse Primer Sequence 5'->3'
Tcap Tandem E-box	TACAGACAAGCTGCTGTCCTCCCT			GTCAGCTTTCAAAGCCTGCAAG
Tcap E1 E-box	GGAGCAACCAGAATCTGGGTA			AAATAGCCCCTTCTTCCCCCT
