# Supplementary material for: MYOD1 functions as a clock amplifier as well as a critical co-factor for downstream circadian gene expression in muscle
Source: eLife. 2019 Feb 21;8:e43017. doi: 10.7554/eLife.43017 (PMC6398978; doi:10.7554/eLife.43017)
Supplement: Supplementary file 8. [file elife-43017-supp8.xlsx]

## Sheet: Sheet1
Supplementary file 8. Primer sequences used in site-directed mutagenesis.
Gene	Forward Primer Sequence 5'->3'			Reverse Primer Sequence 5'->3'
Bmal1	CAGAAAGTAGGTATCTAACGGAGGTGCC			GGCACCTCCGTTAGATACCTACTTTCTG
Tcap E1	CTCTGCTTATAGTGCATGACGCCAGAGGG			CCCTCTGGCGTCATGCACTATAAGCAGAG
Tcap E2 5'	GACAGTGCCAAGGTGGGTGCAGGCTGCCCATGTGCC			GGCACATGGGCAGCCTGCACCCACCTTGGCACTGTC
Tcap E2 3'	GCACGAGGCTGCCTGCATGCCTGGTCCGAGG			CCTCGGACCAGGCATGCAGGCAGCCTCGTGC
pRLnull	GCCTTTCTCTCCAAGTATGTCCACTCCCAG			CTGGGAGTGGACATACTTGGAGAGAAAGGC
