# Supplementary material for: MYOD1 functions as a clock amplifier as well as a critical co-factor for downstream circadian gene expression in muscle
Source: eLife. 2019 Feb 21;8:e43017. doi: 10.7554/eLife.43017 (PMC6398978; doi:10.7554/eLife.43017)
Supplement: Supplementary file 9. [file elife-43017-supp9.xlsx]

## Sheet: Sheet1
Supplementary file 9. Primer sequences used in RT-PCR in C2C12 myotubes.
Gene	Forward Primer Sequence 5'->3'			Reverse Primer Sequence 5'->3'
Bmal1	AGCGGATTGGTCGGAAAGTA			GGGTTCCACATTTGAAGCCT
MyoD1	ATGGATTACAGCGGCCCC			TGTGGAGATGCGCTCCACTA
Tcap	GATGCGCCTGGGTATCCTC			GATCGAGACAGGGTACGG
Rpl26	CGAGTCCAGCGAGAGAAGG			GCAGTCTTTAATGAAAGCCGTG
