# Supplementary figures and images for: MYOD1 functions as a clock amplifier as well as a critical co-factor for downstream circadian gene expression in muscle
Source: eLife journal article supplement (doi:10.7554/elife.43017), 2019-02-21

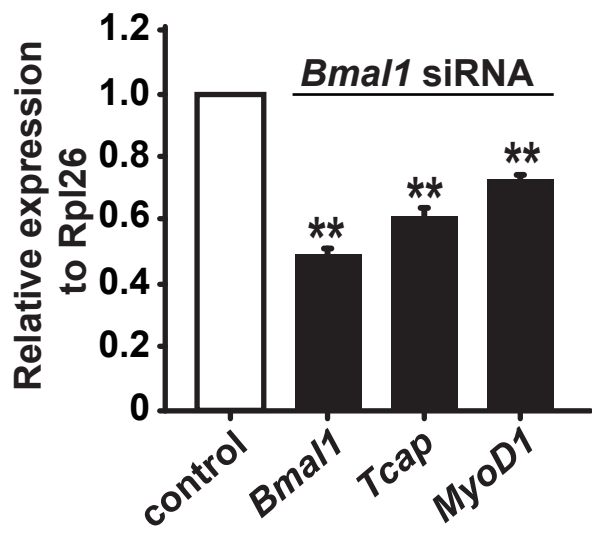

Supplement: supp [file elife-43017-supp-v1.zip]
